# Supplementary material for: Alterations in the LRRK2-Rab pathway in urinary extracellular vesicles as Parkinson’s disease and pharmacodynamic biomarkers
Source: PubMed Central journal article supplement (PMC9905493; doi:10.1038/s41531-023-00445-9), 2023-02-07

Supplementary Information file with full, uncropped western blots  
(Figure 1d, 5a, 5b, 5c, 6a, and supplementary figures: 1b, 3a, 5a, 5b, 6, 7,  
10, 11a, 13a, 13b, 14a, 14b)

Title: Alterations in the LRRK2-Rab pathway in urinary extracellular vesicles as  
Parkinson's disease and pharmacodynamic biomarkers

Authors: Jean-Marc Taymans, Eugenie Mutez, William Sibrán, Laurine Vandewynckel,  
Claire Deldycke, Séverine Bleuse, Antoine Marchand, Alessia Sarchione, Alexandre  
Kreisler, Clémence Simonin, James Koprach, Guillaume Baille, Luc Defebvre, Kathy  
Dujardin, Alain Destée, and Marie-Christine Chartier-Harlin

Figure 1d

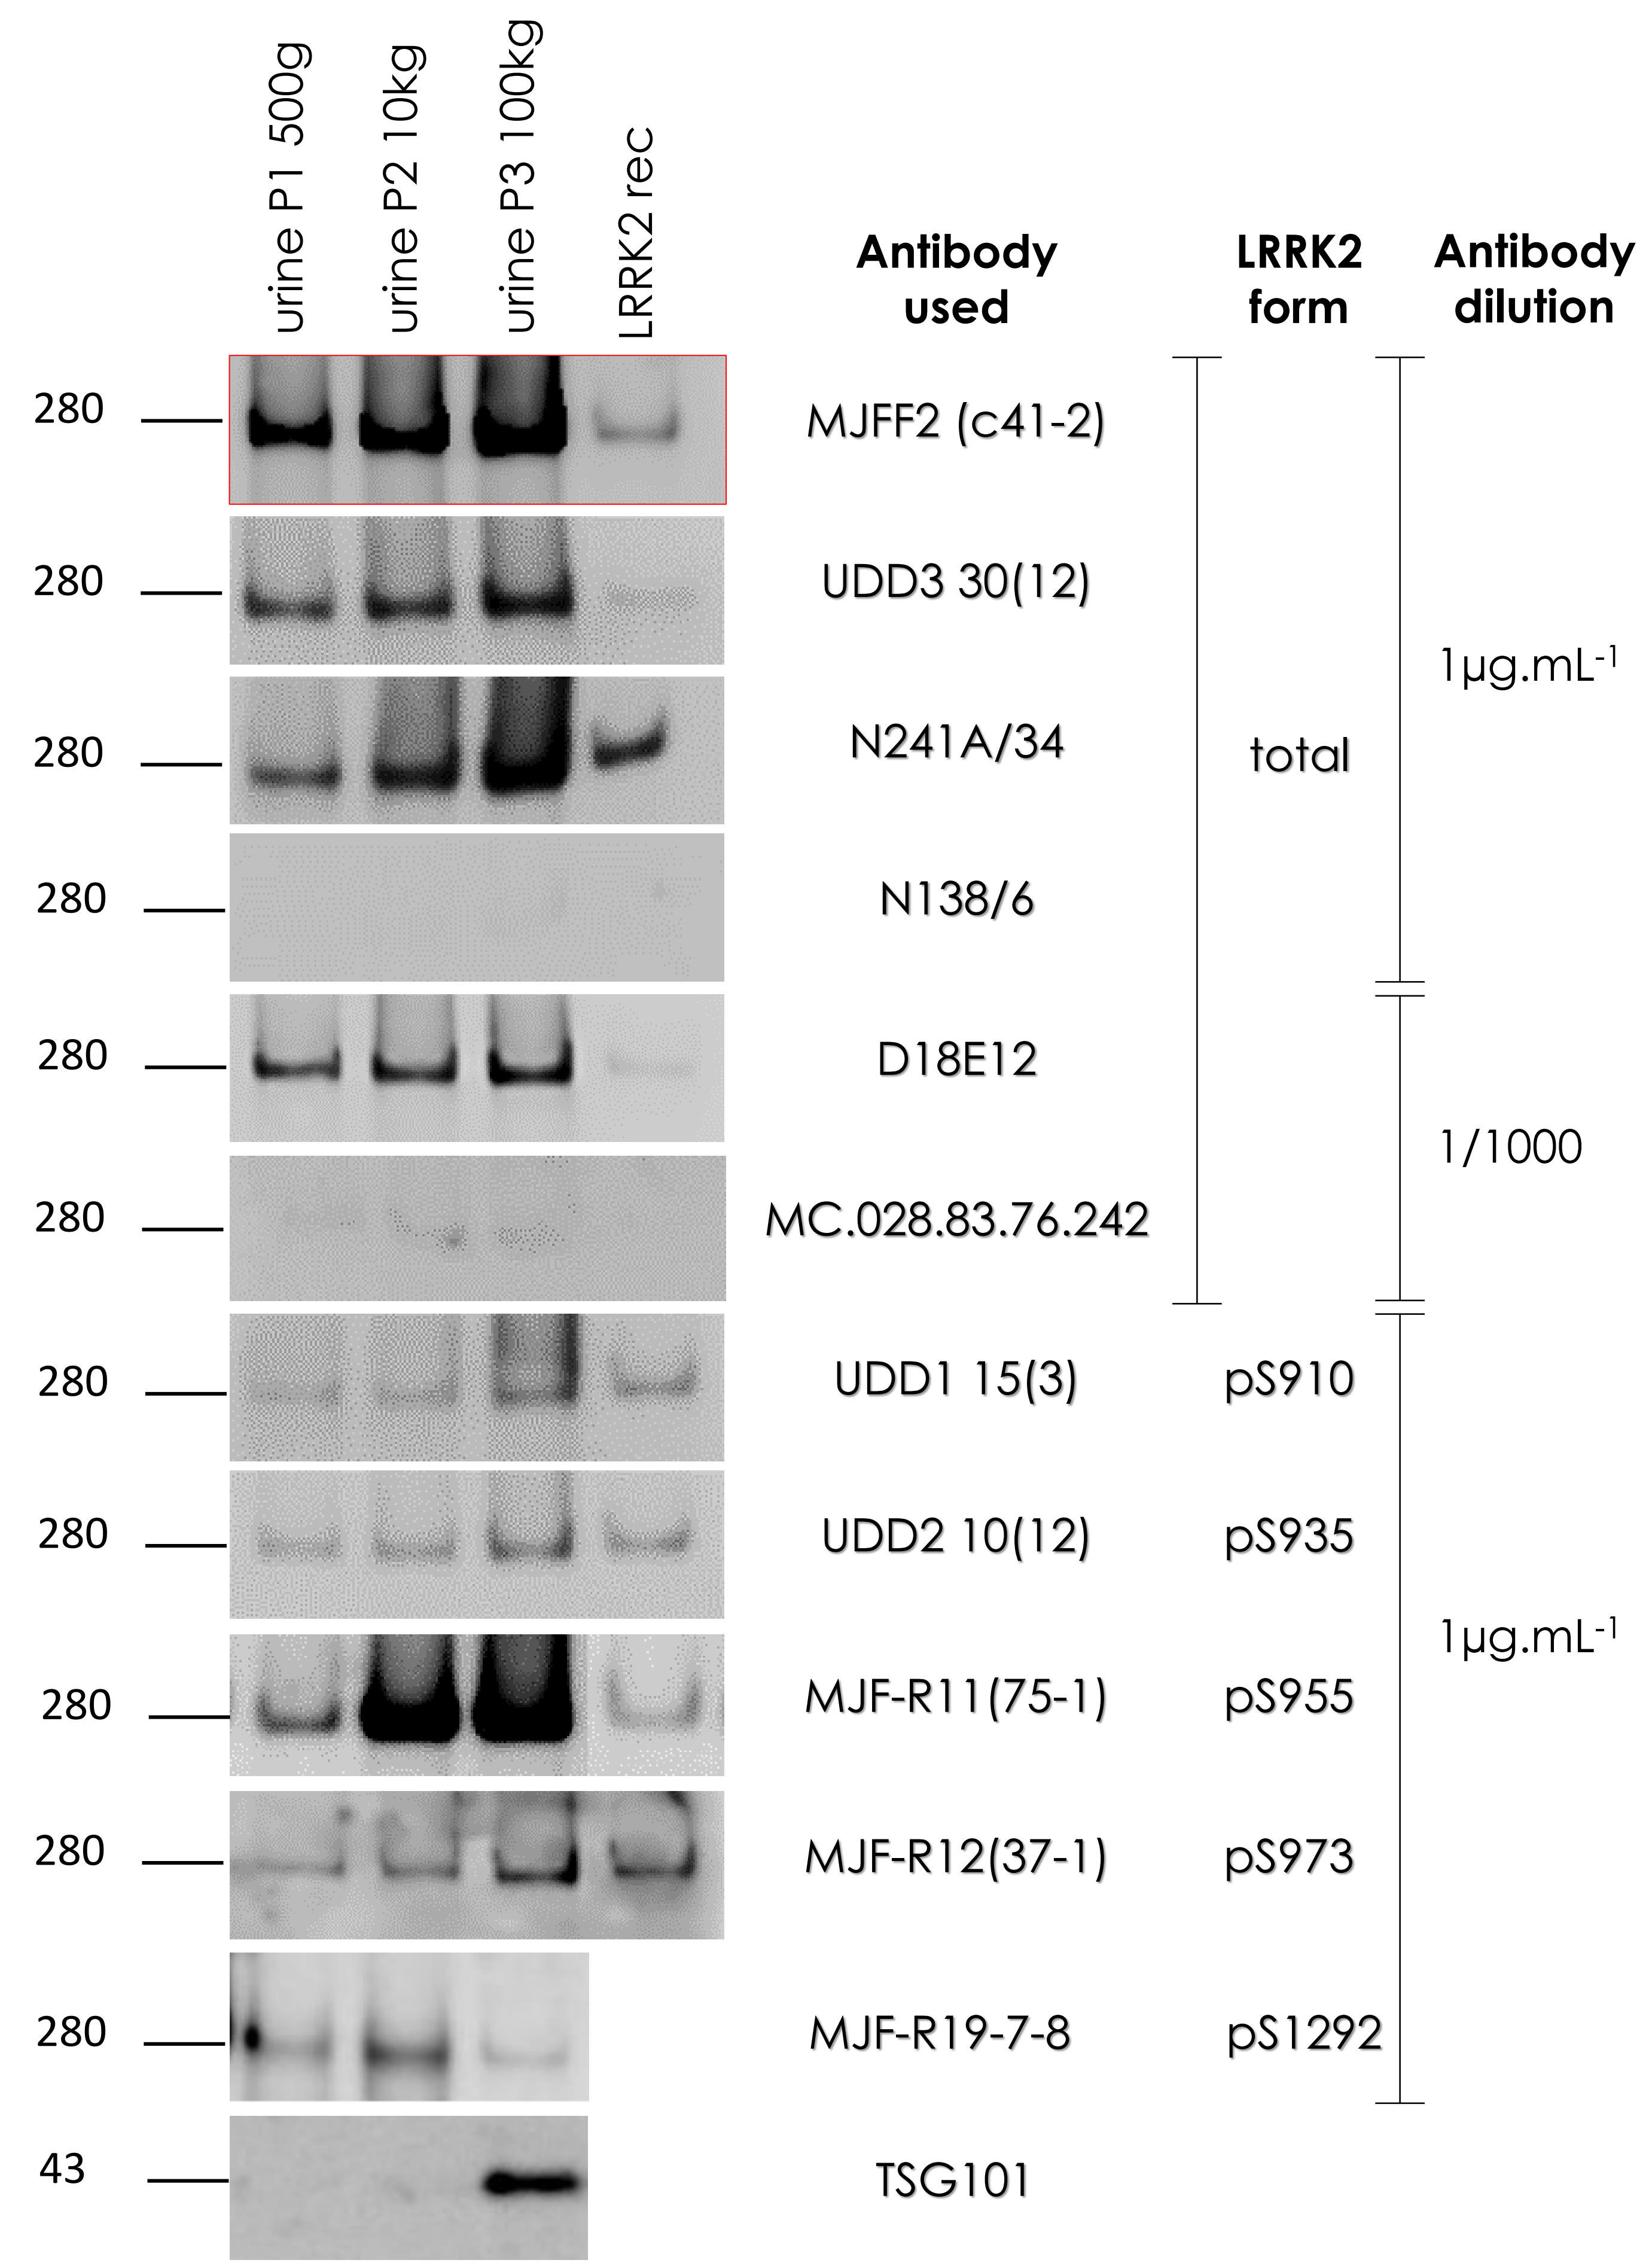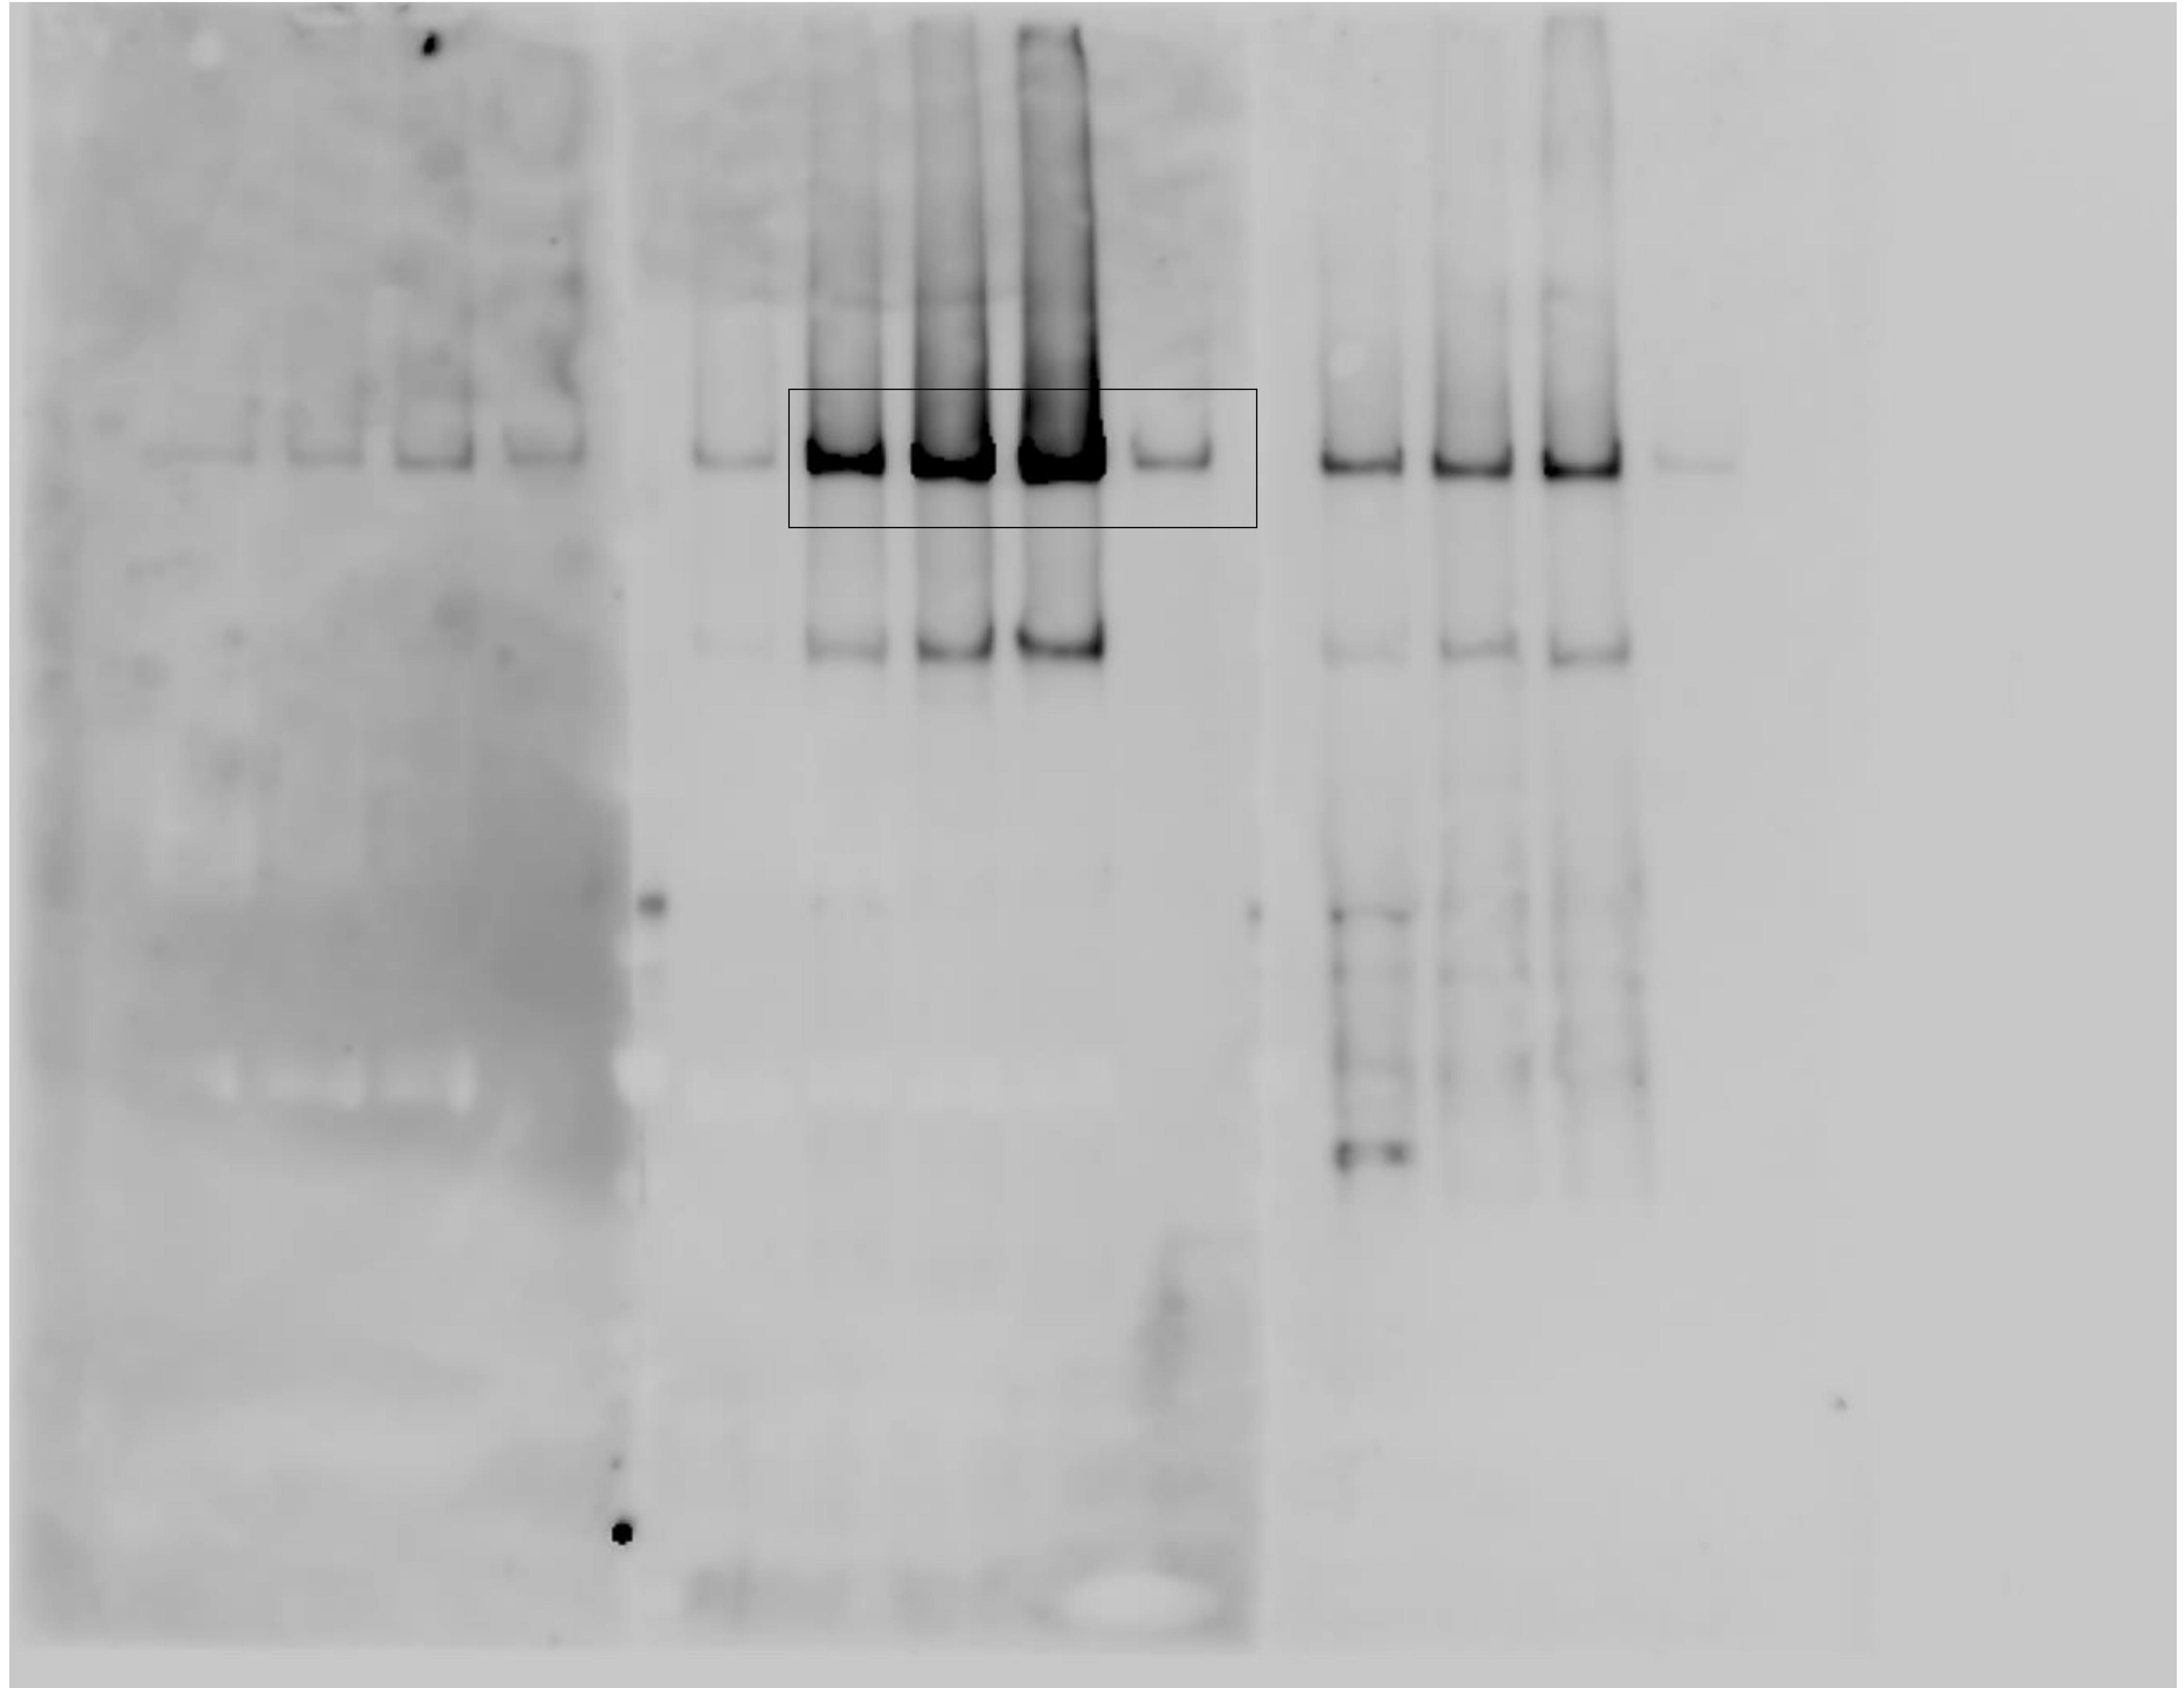

Figure 1d

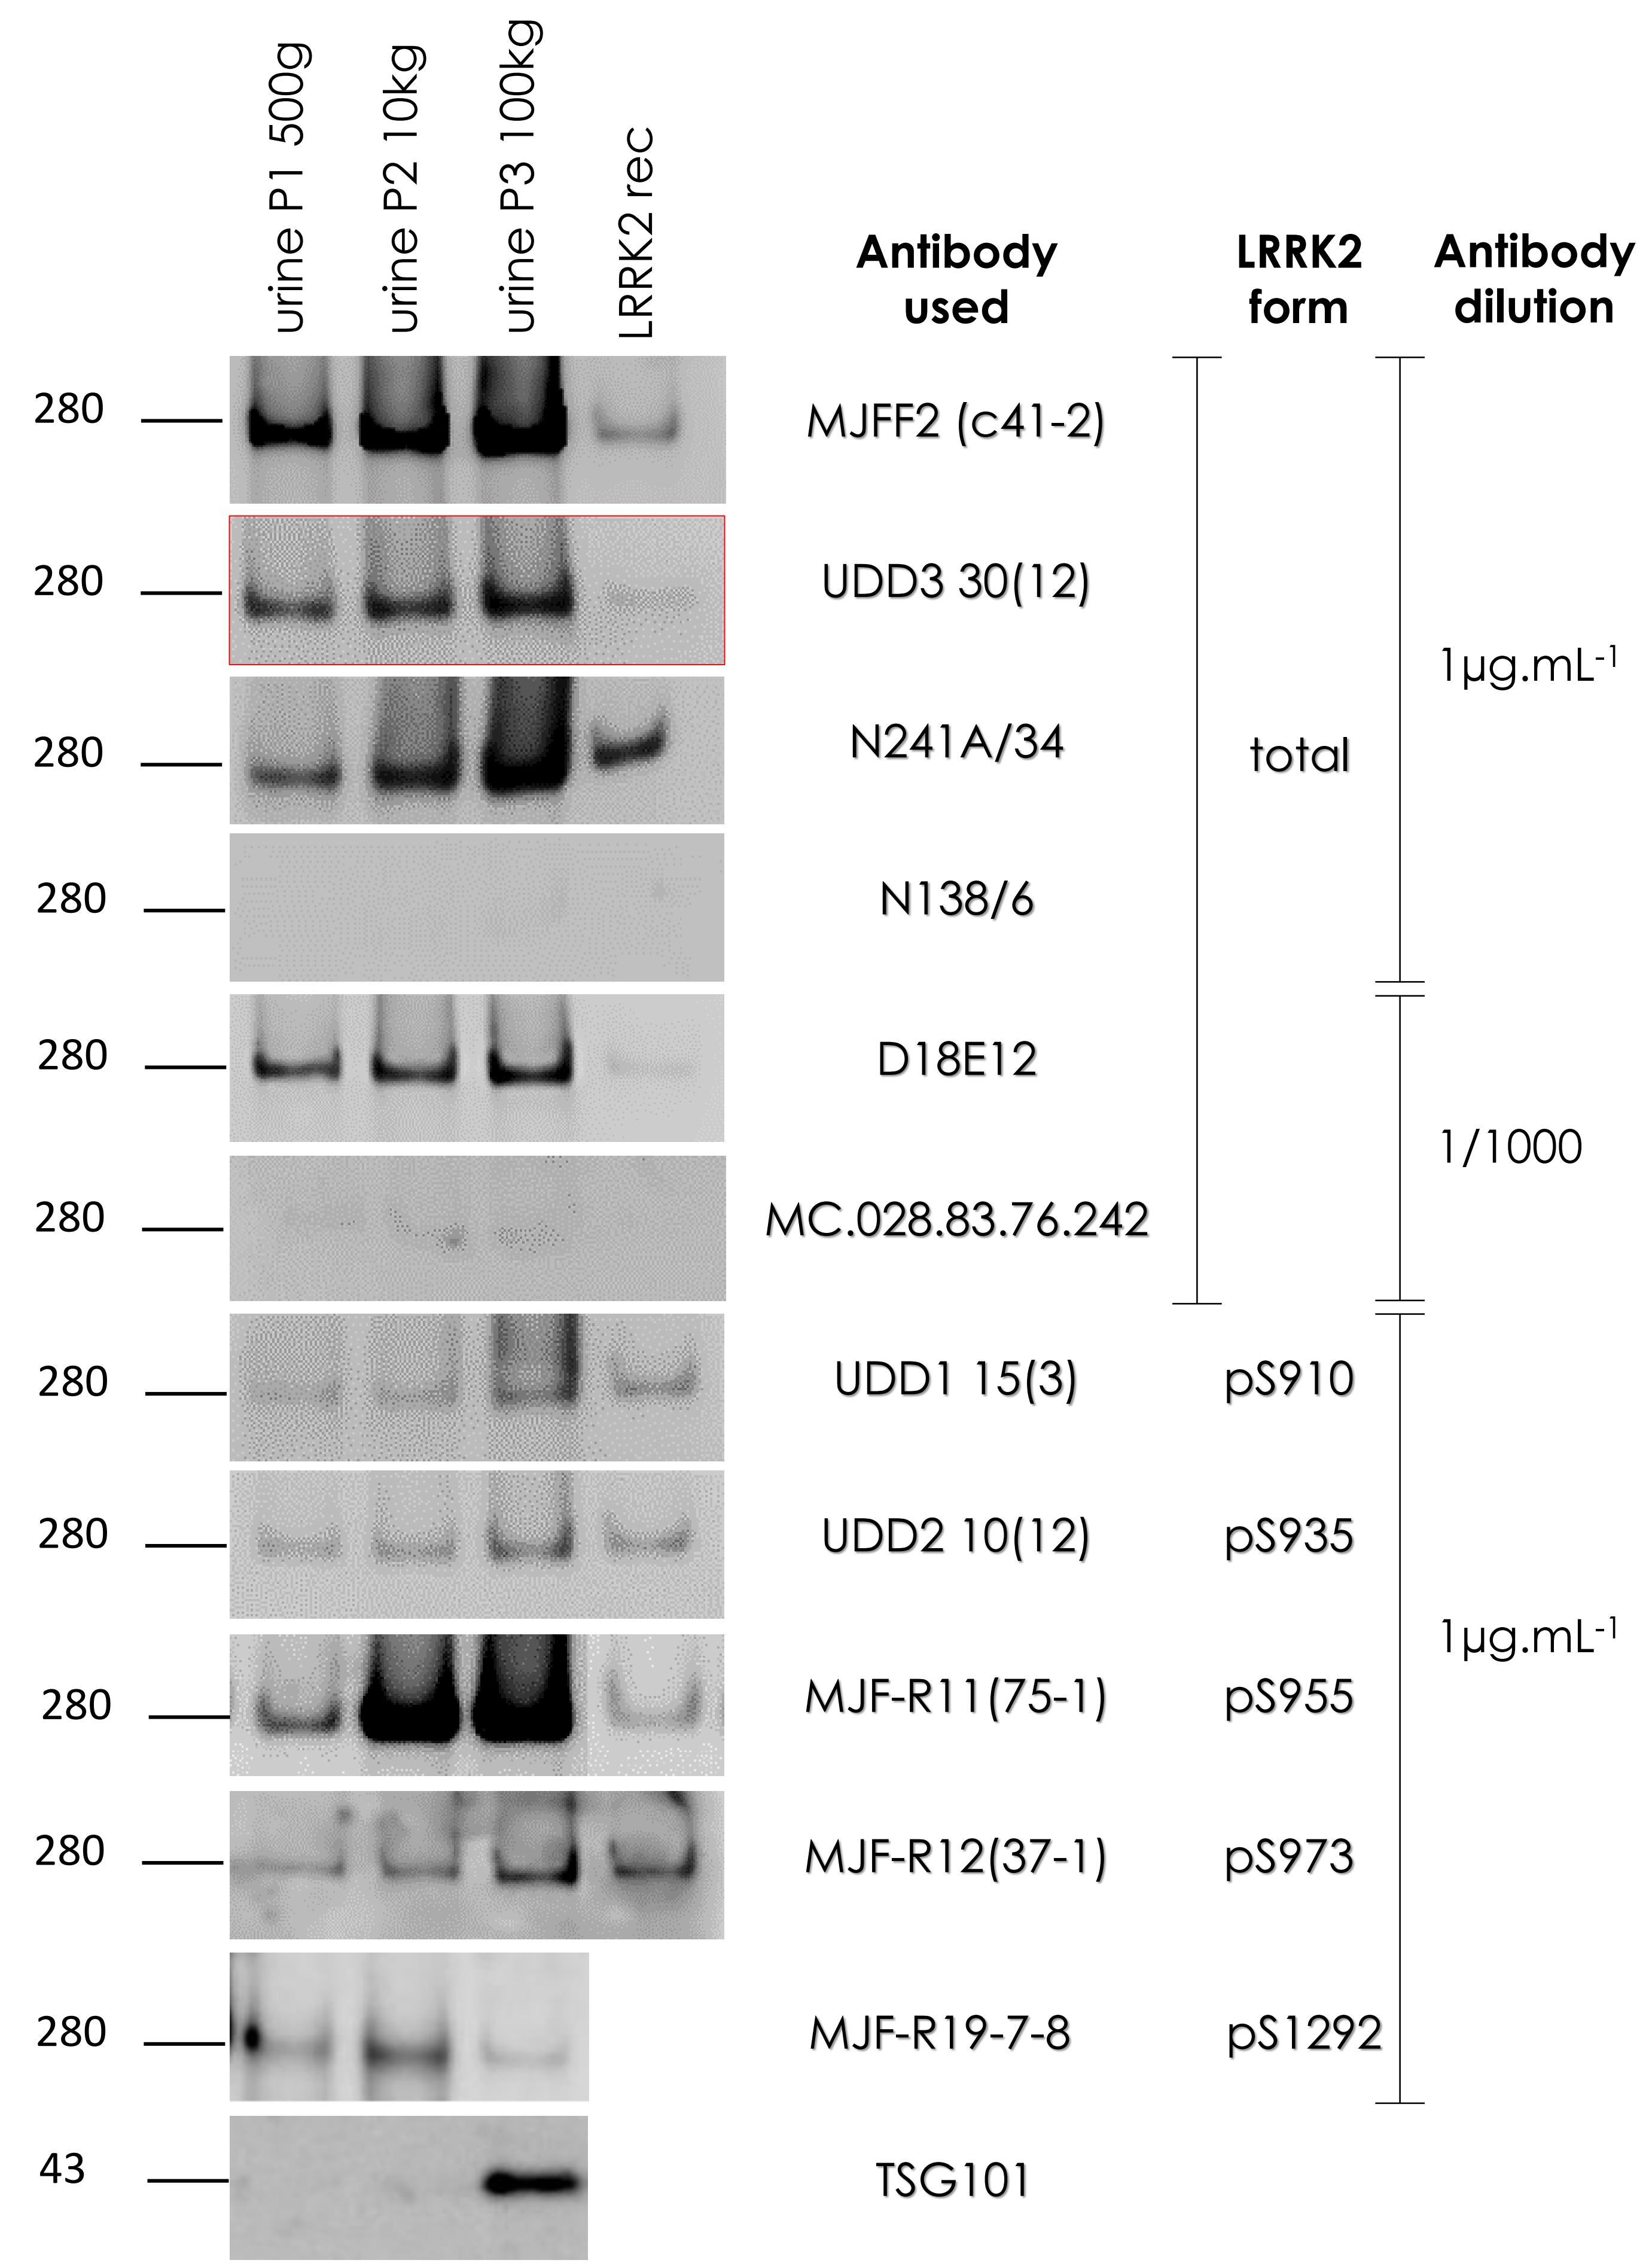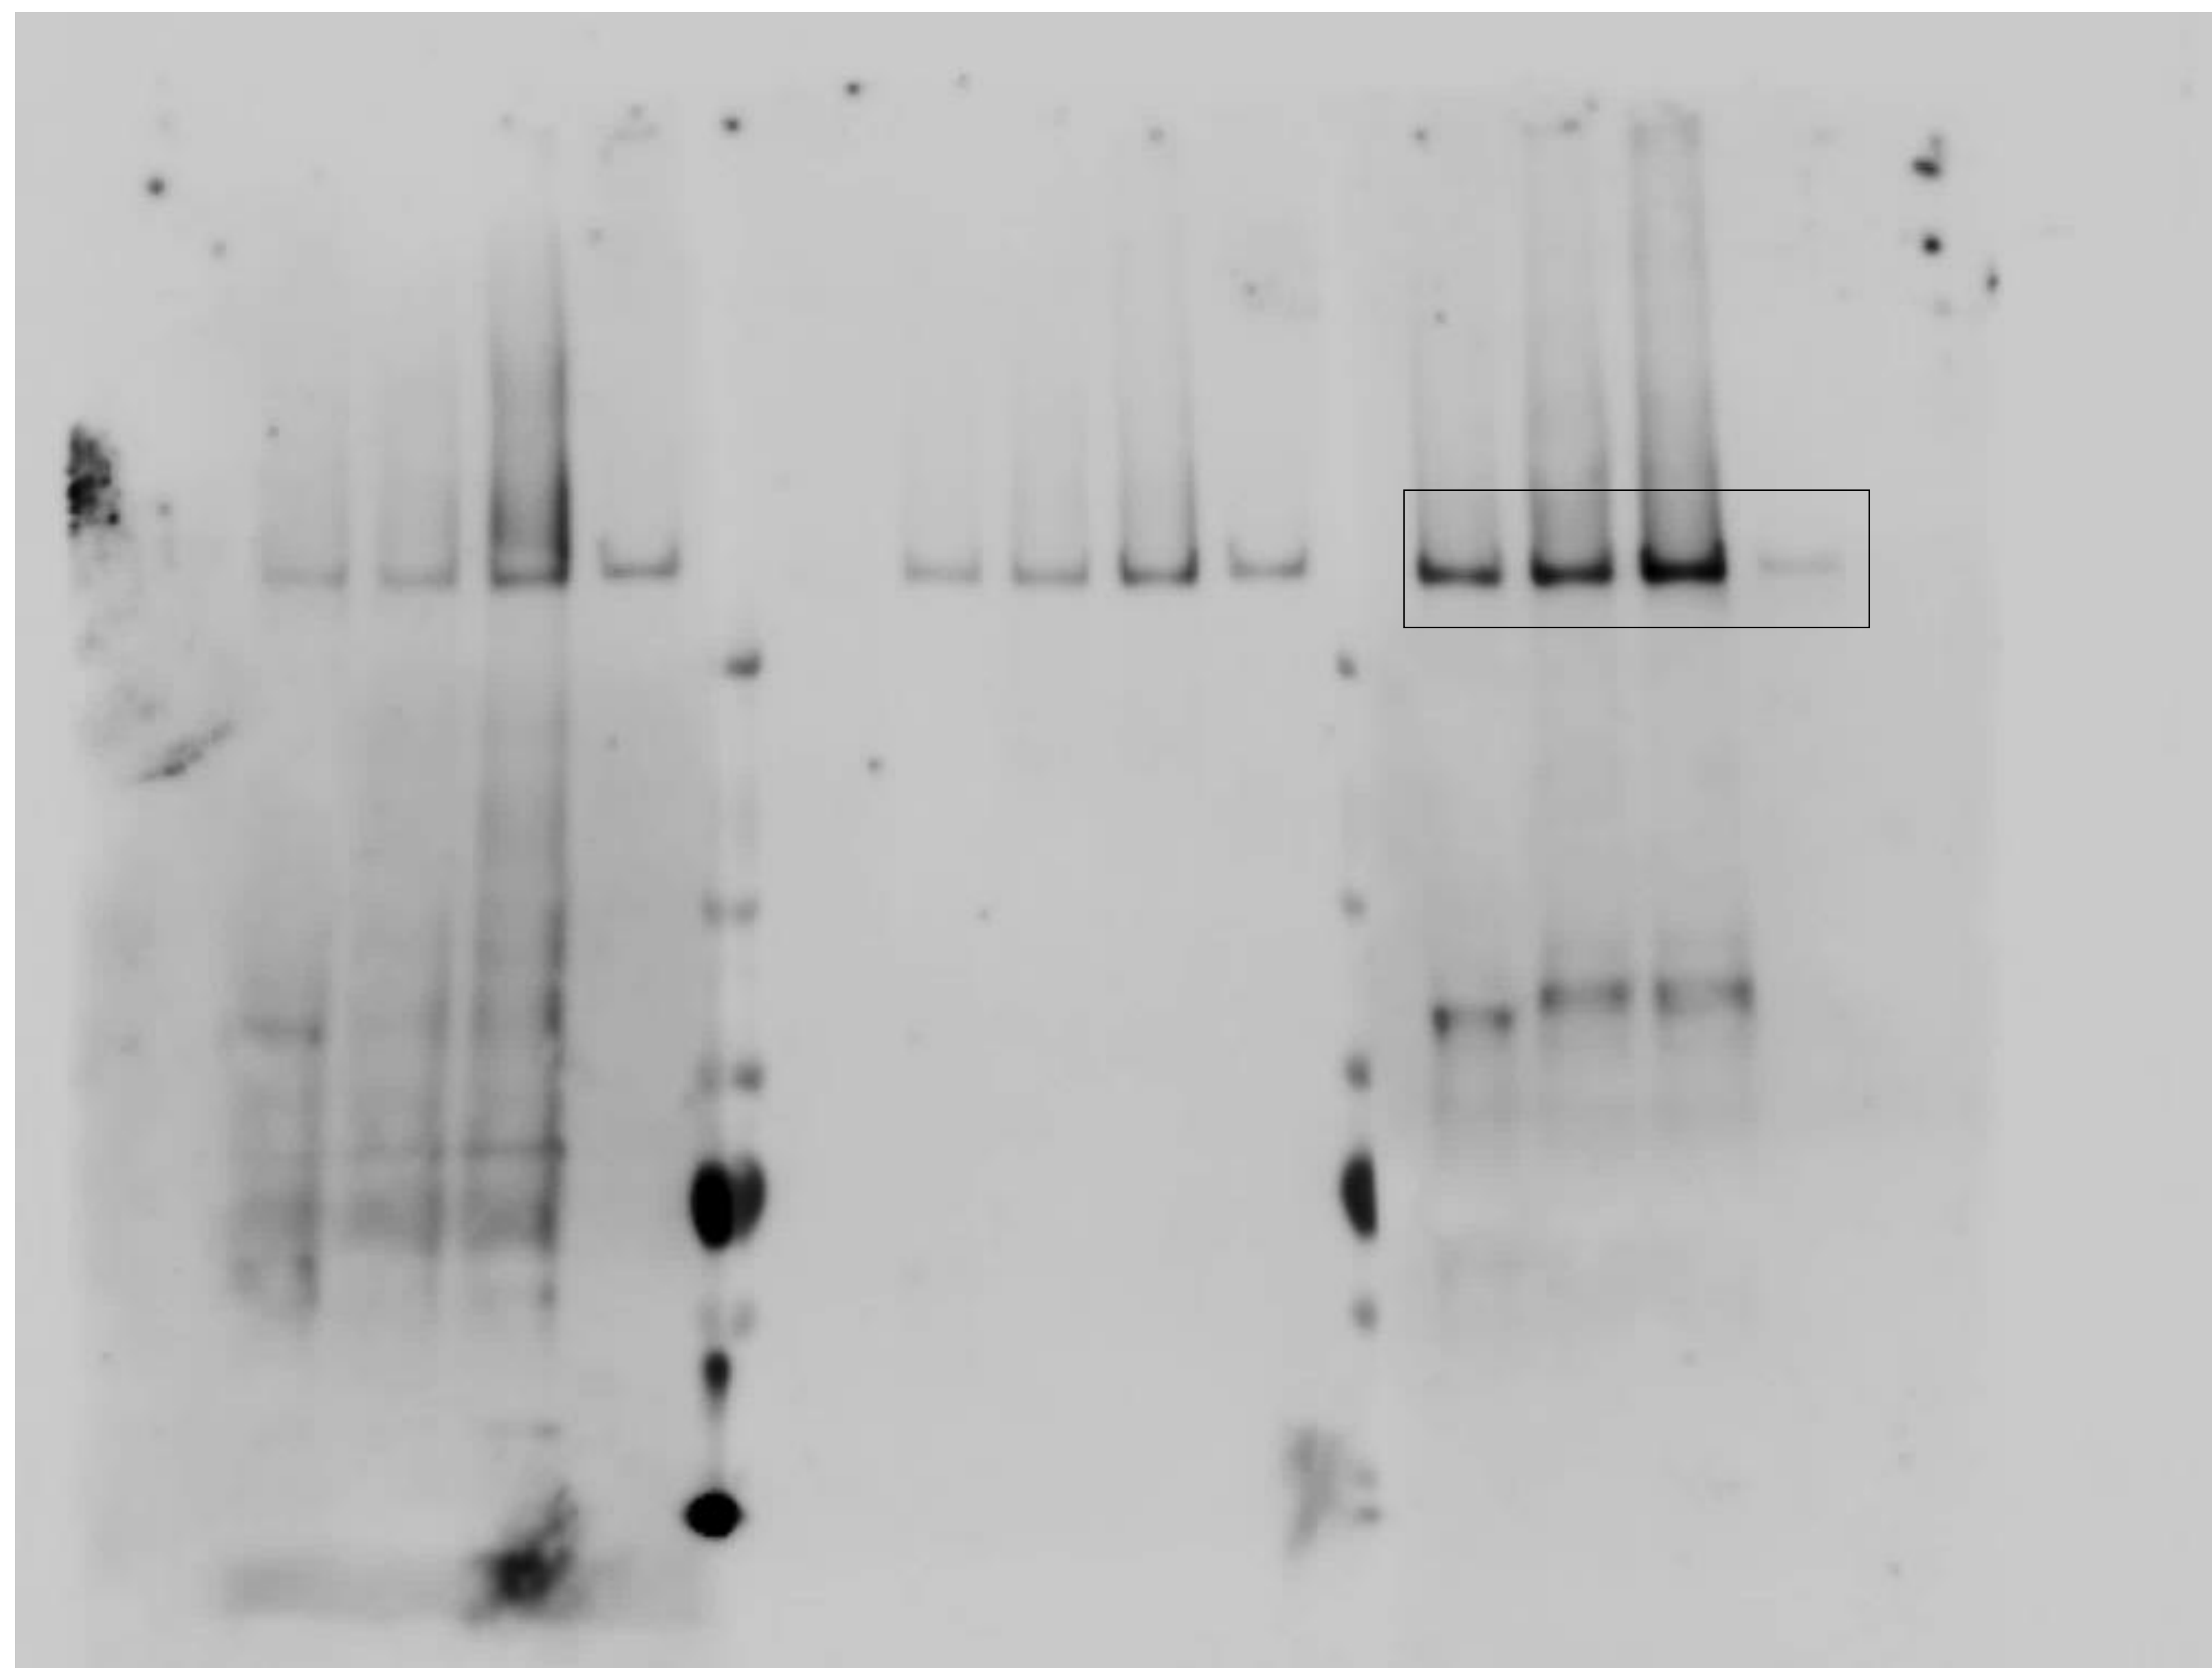

Figure 1d

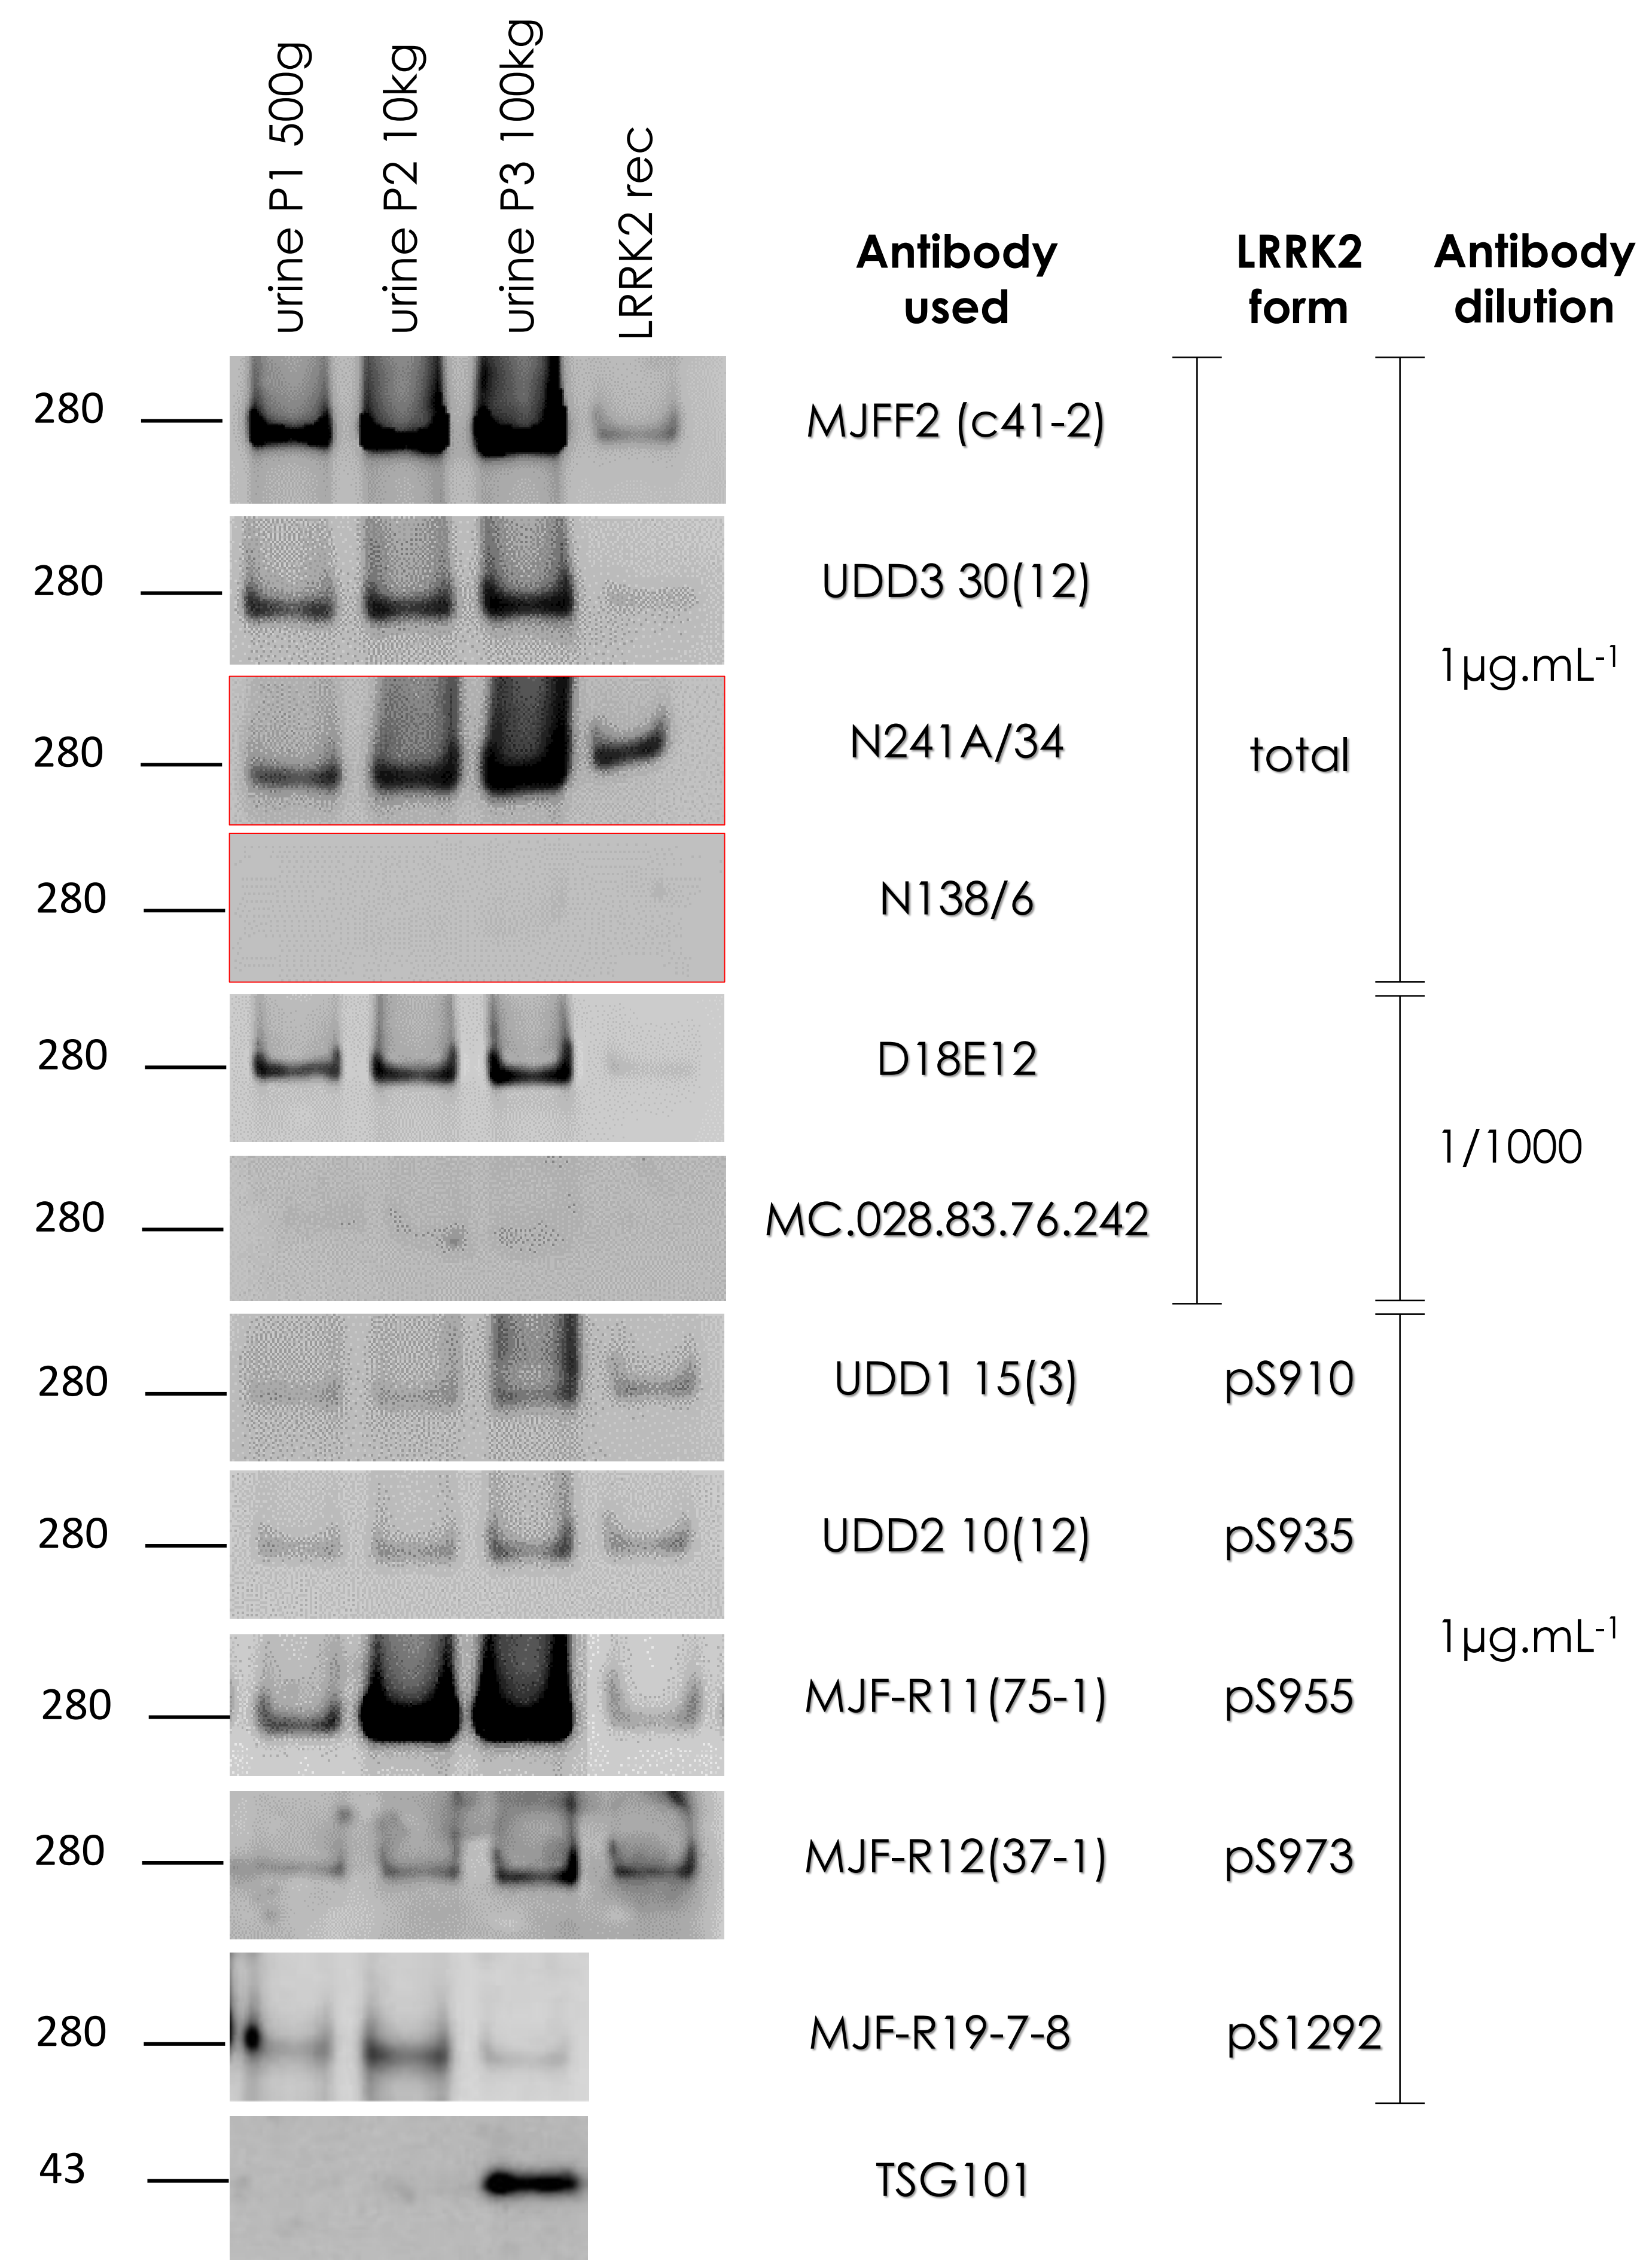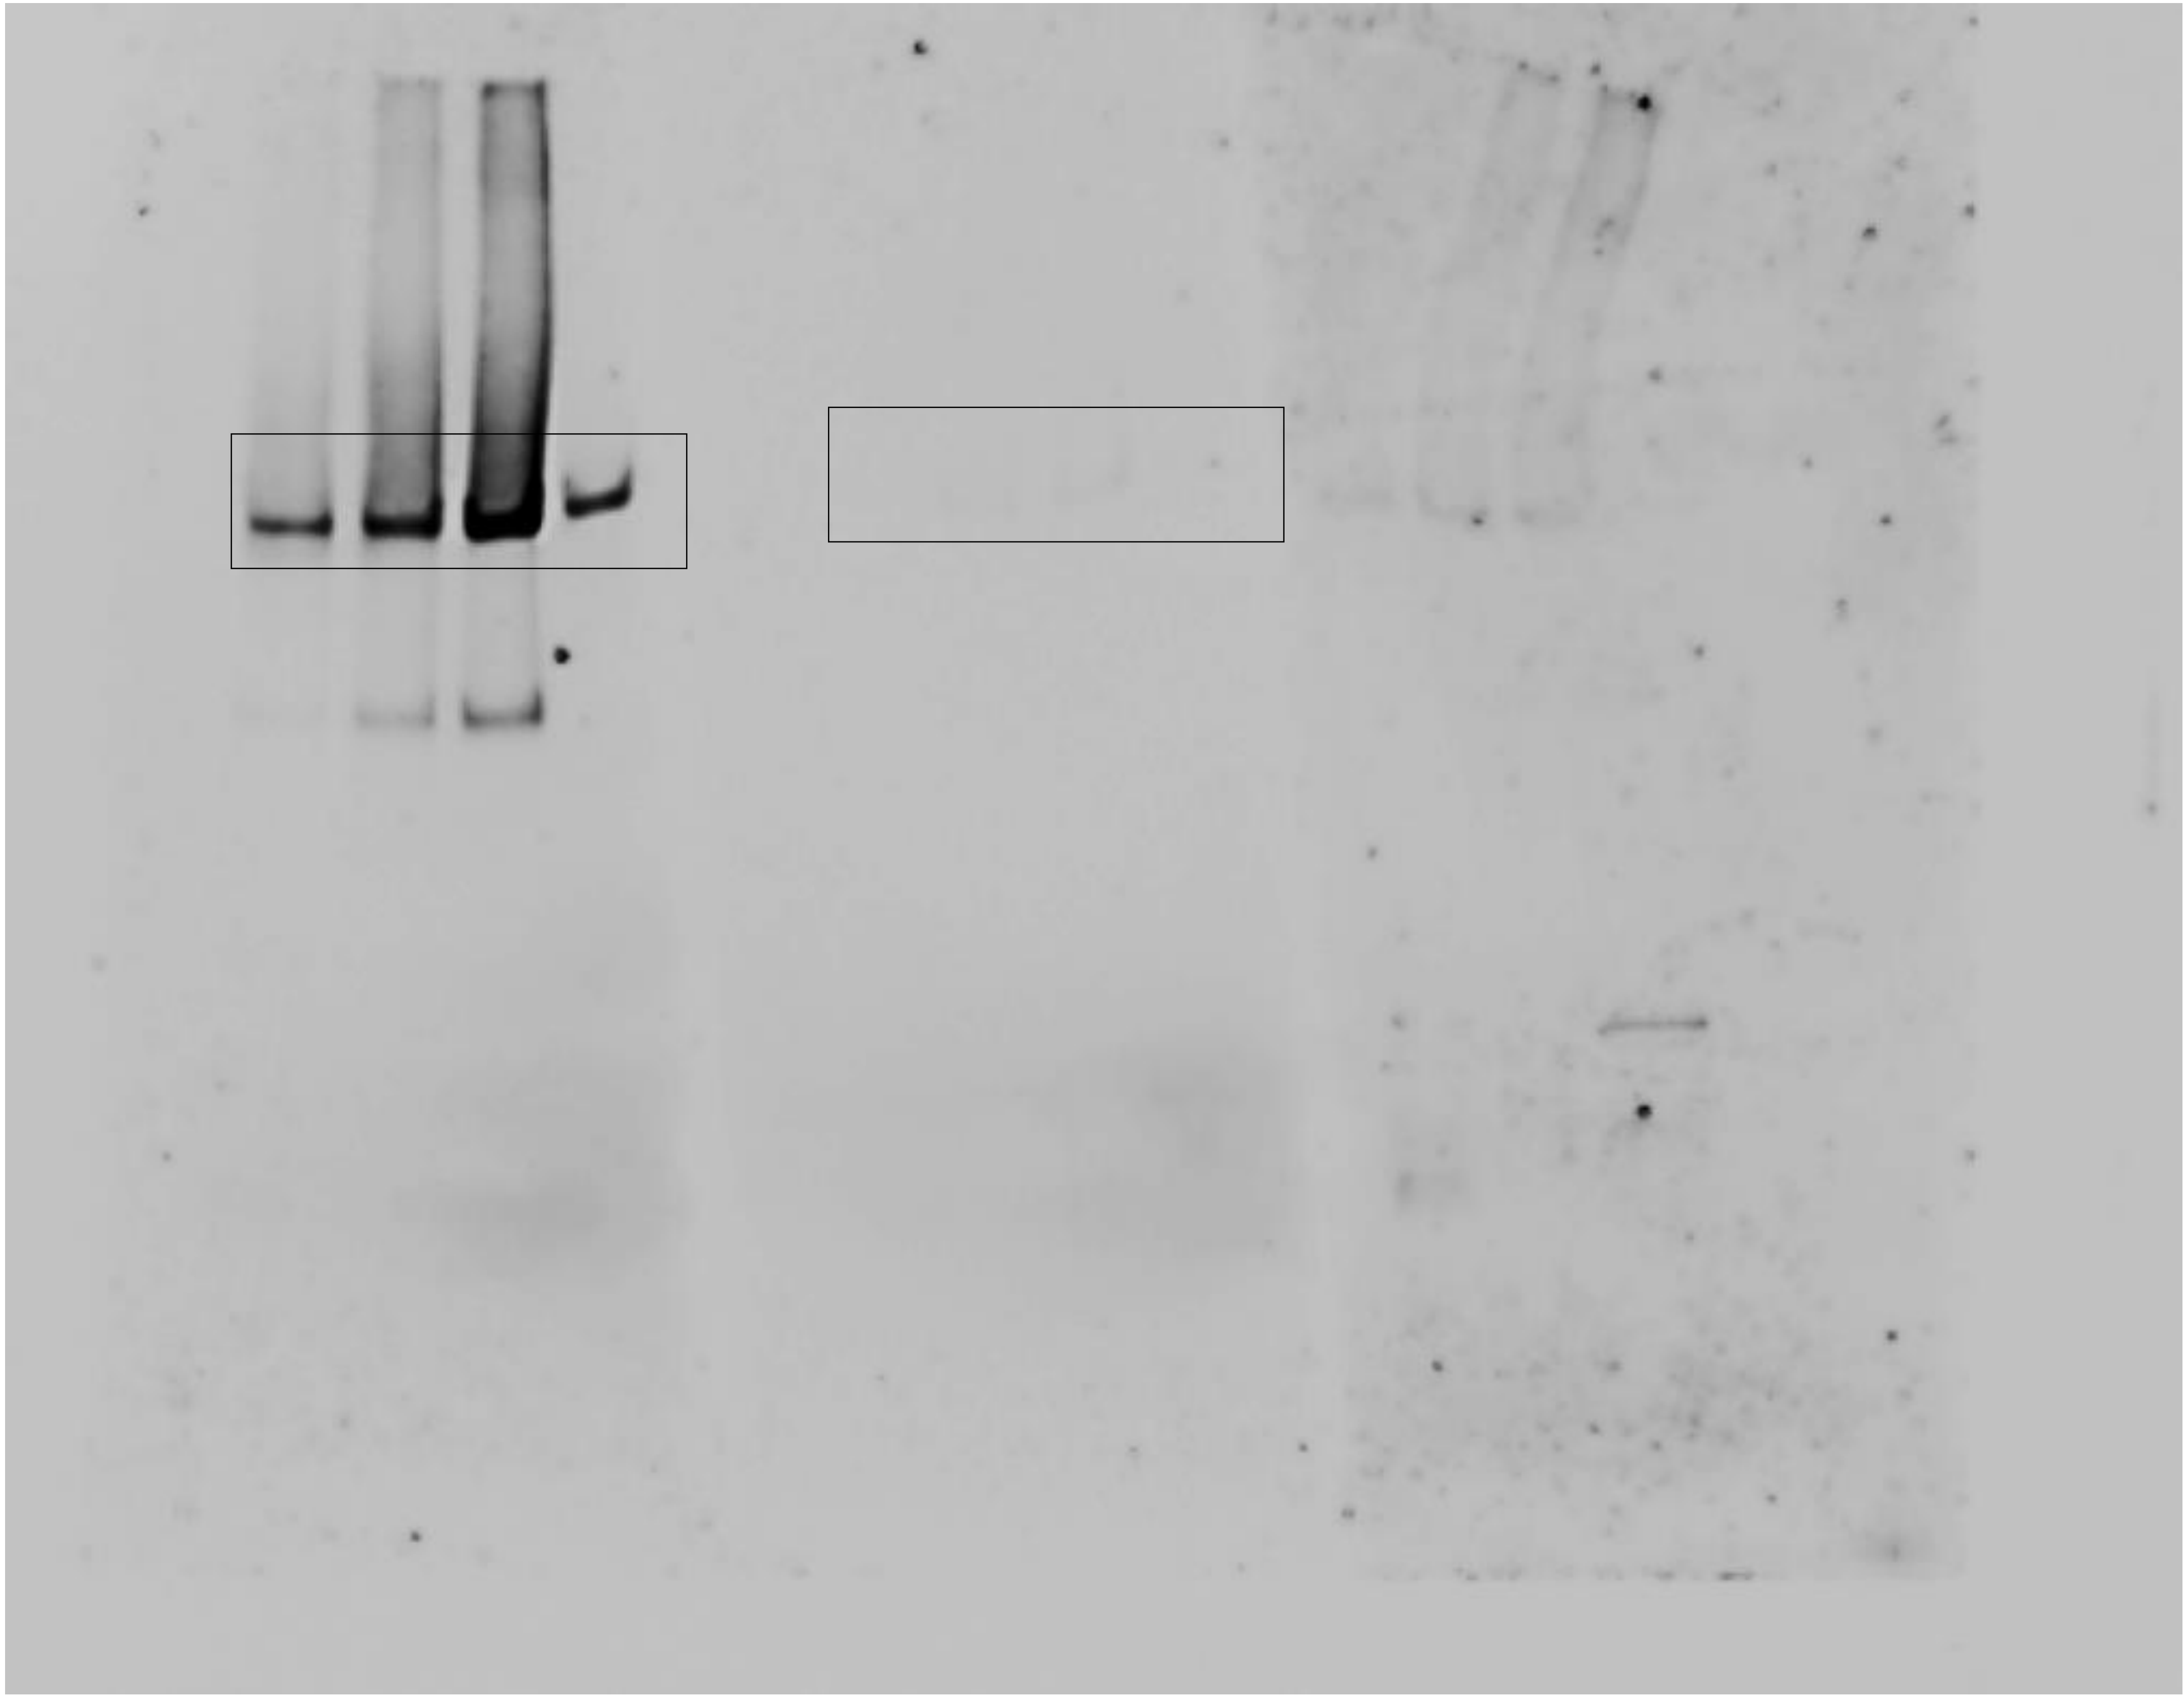

Figure 1d

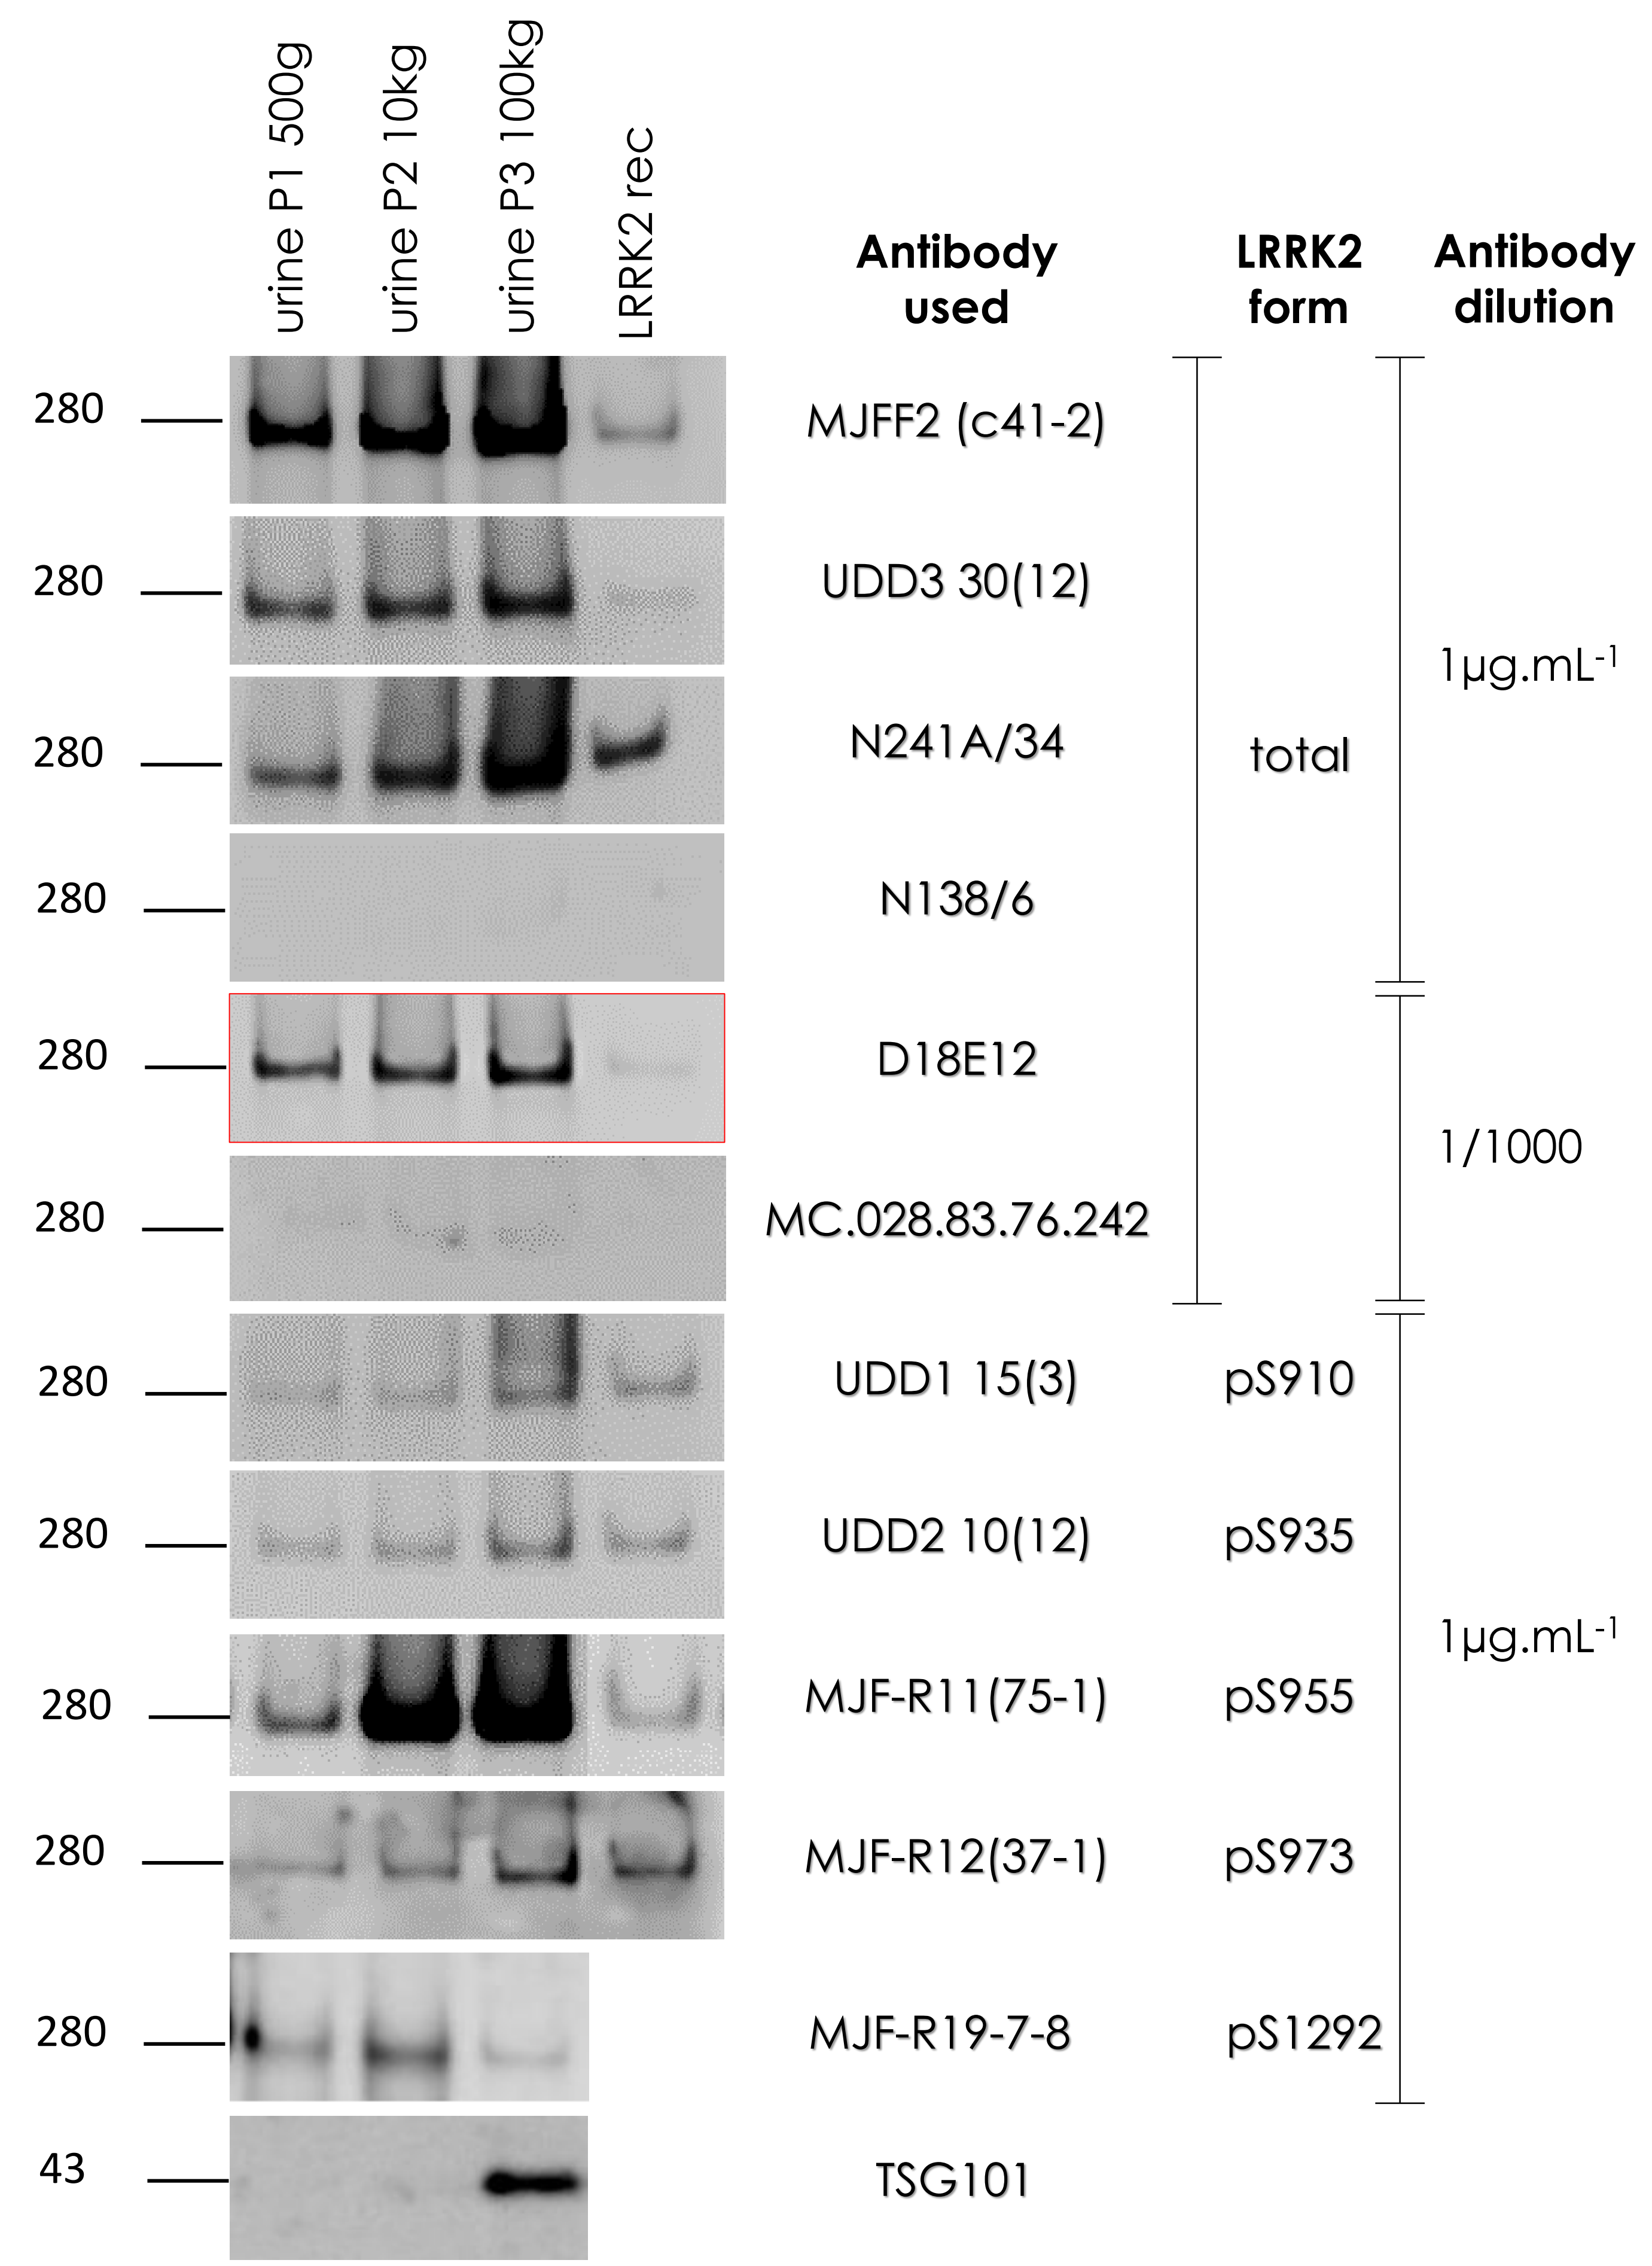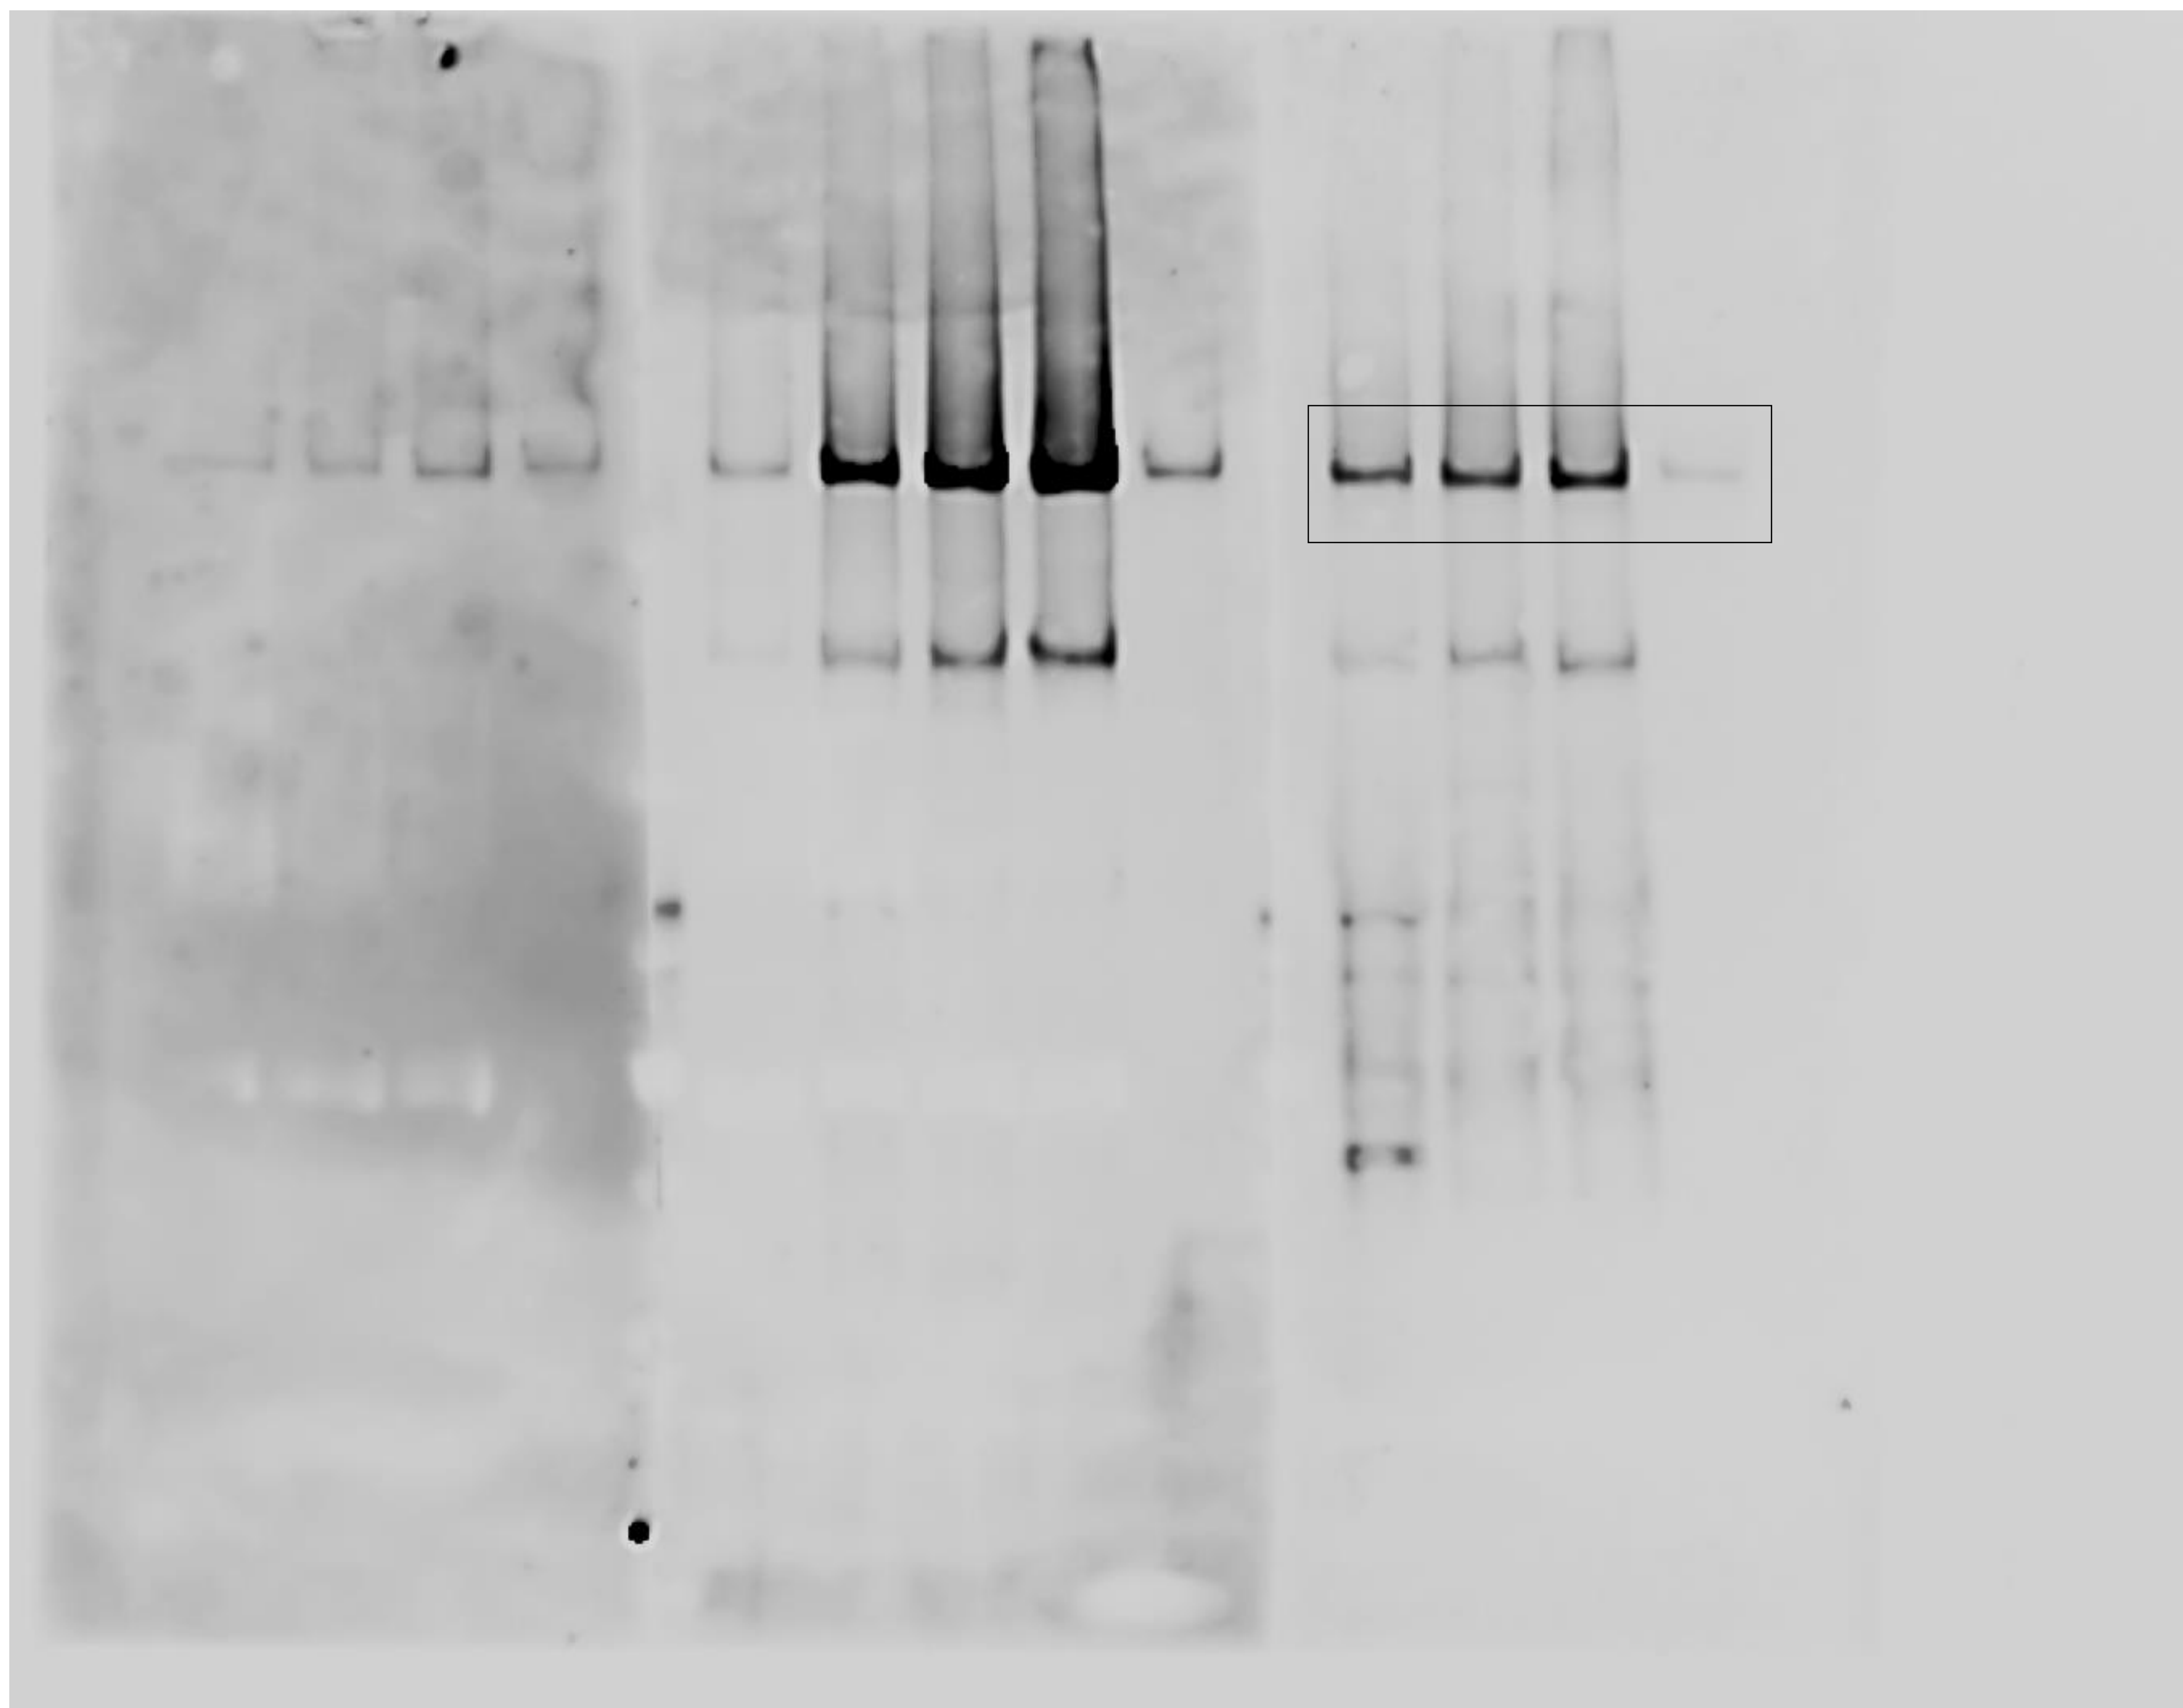

Figure 1d

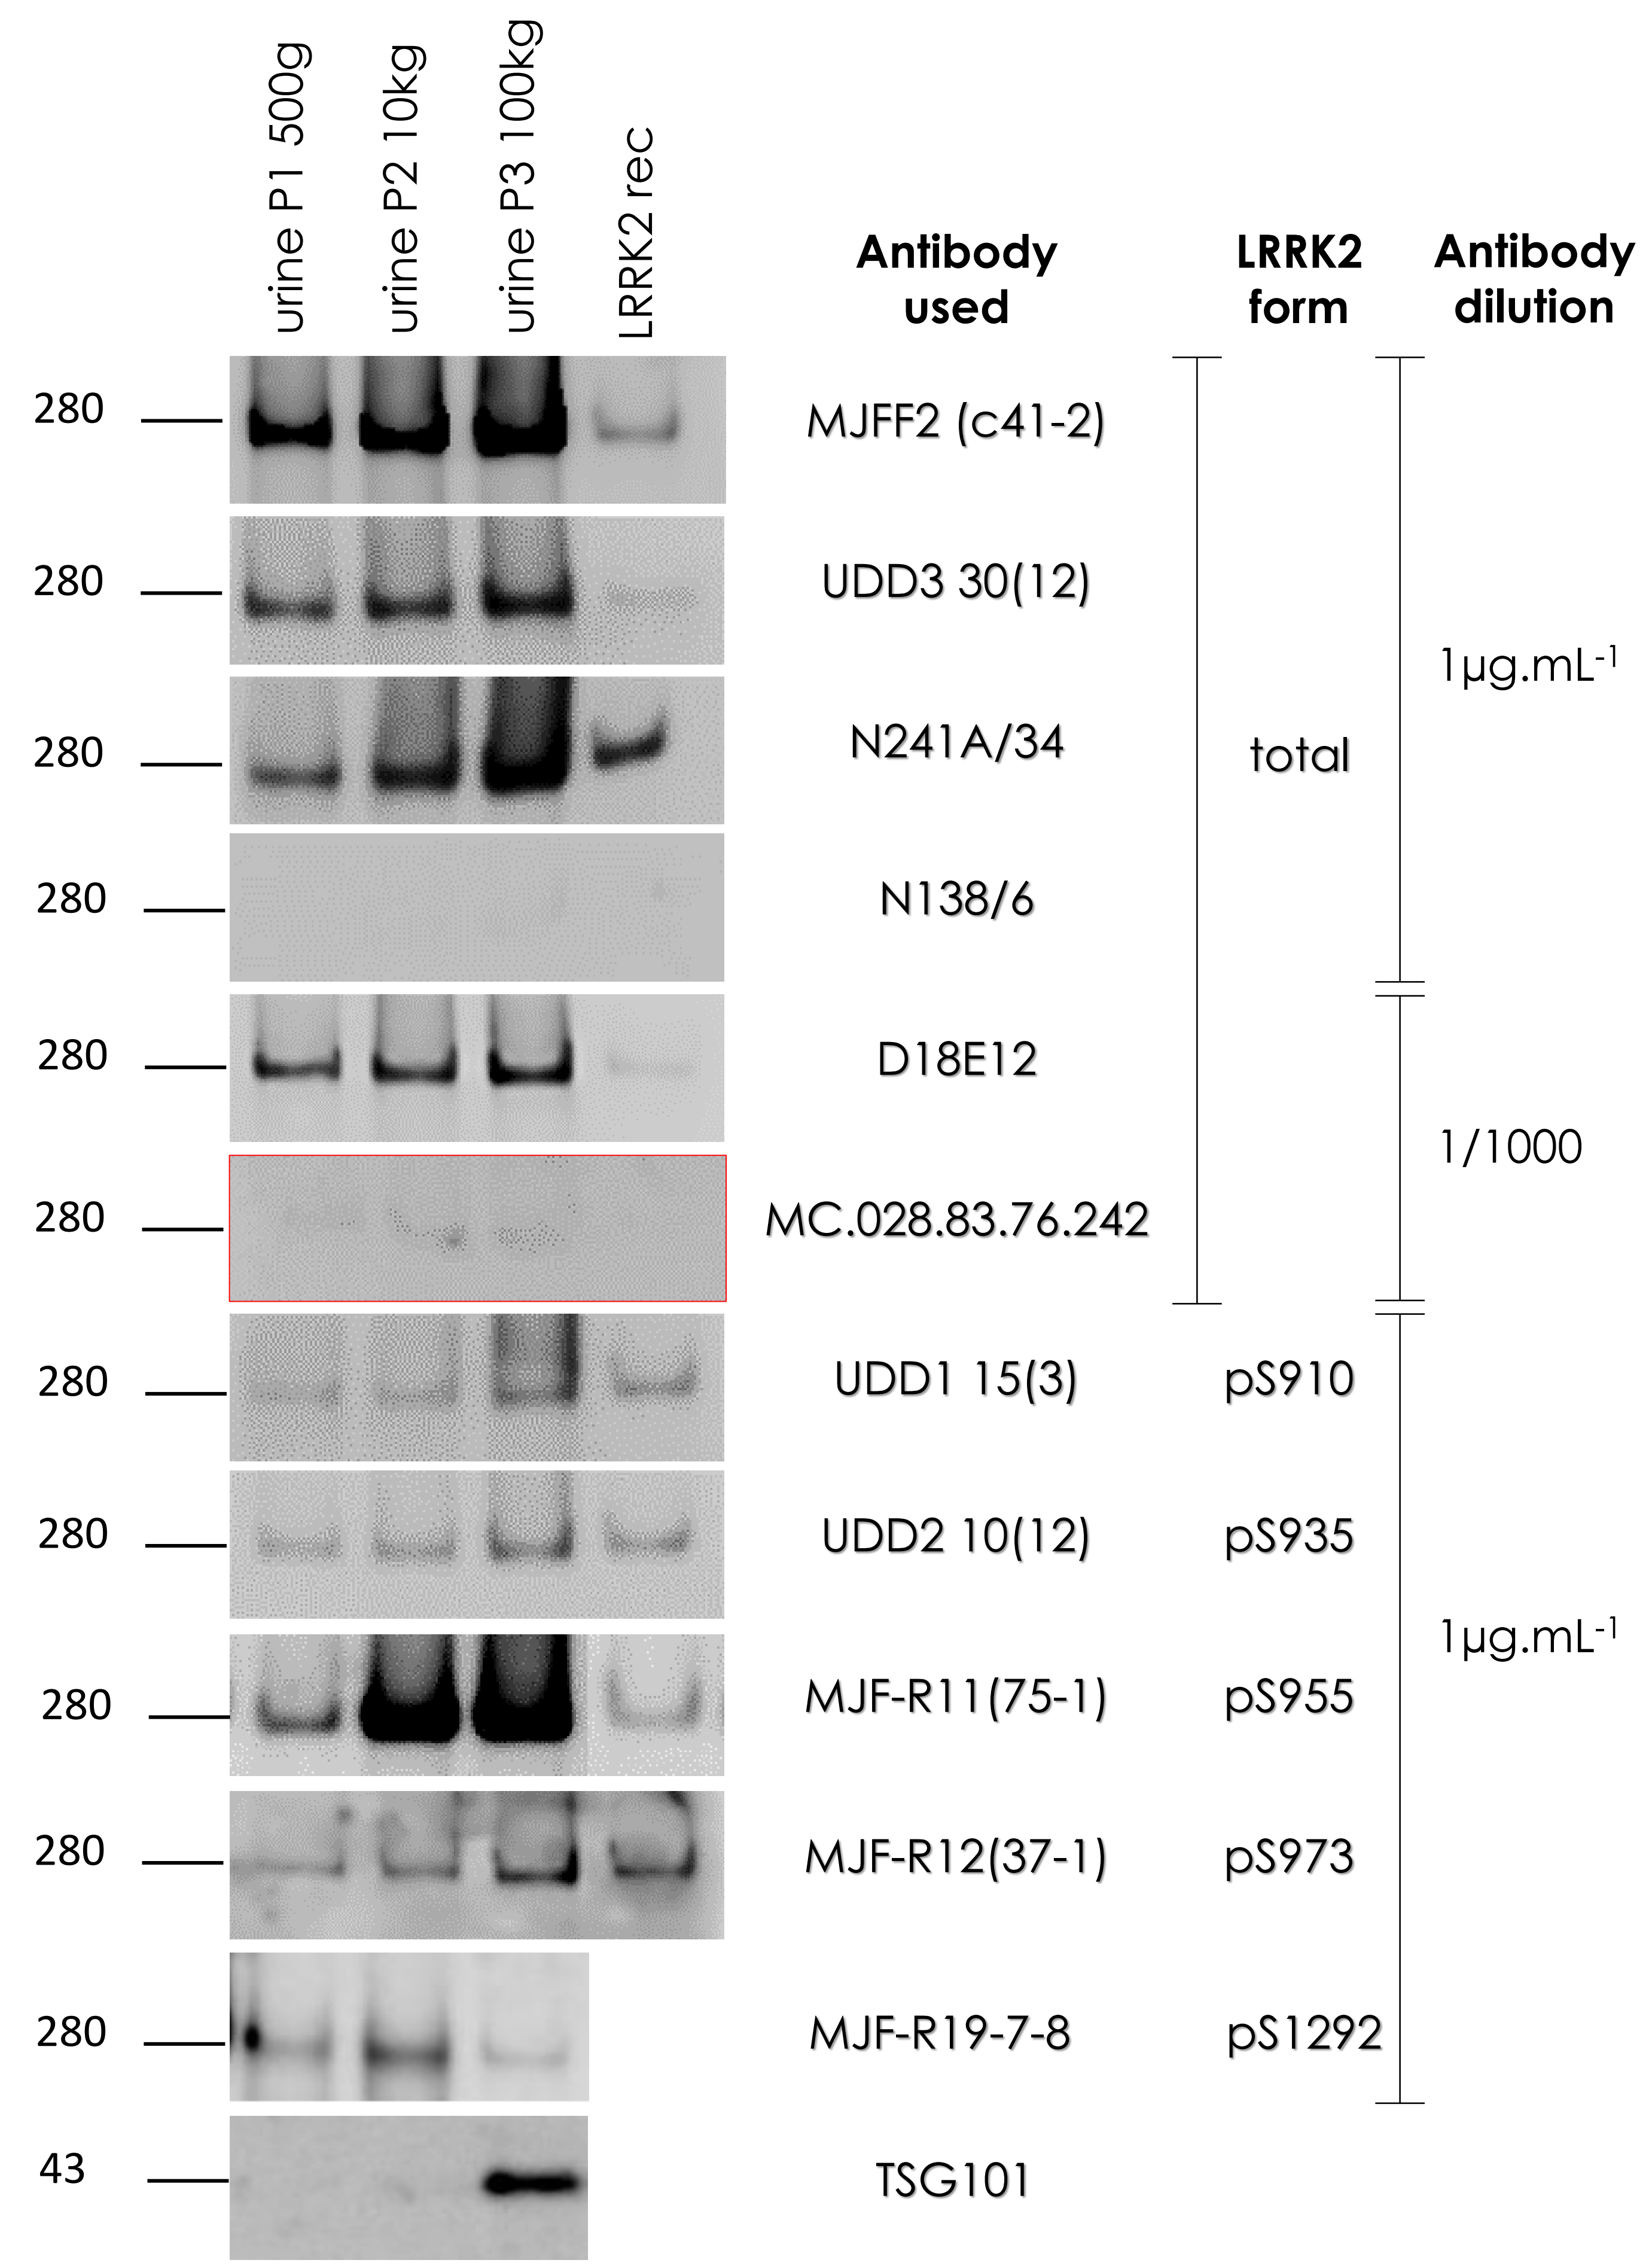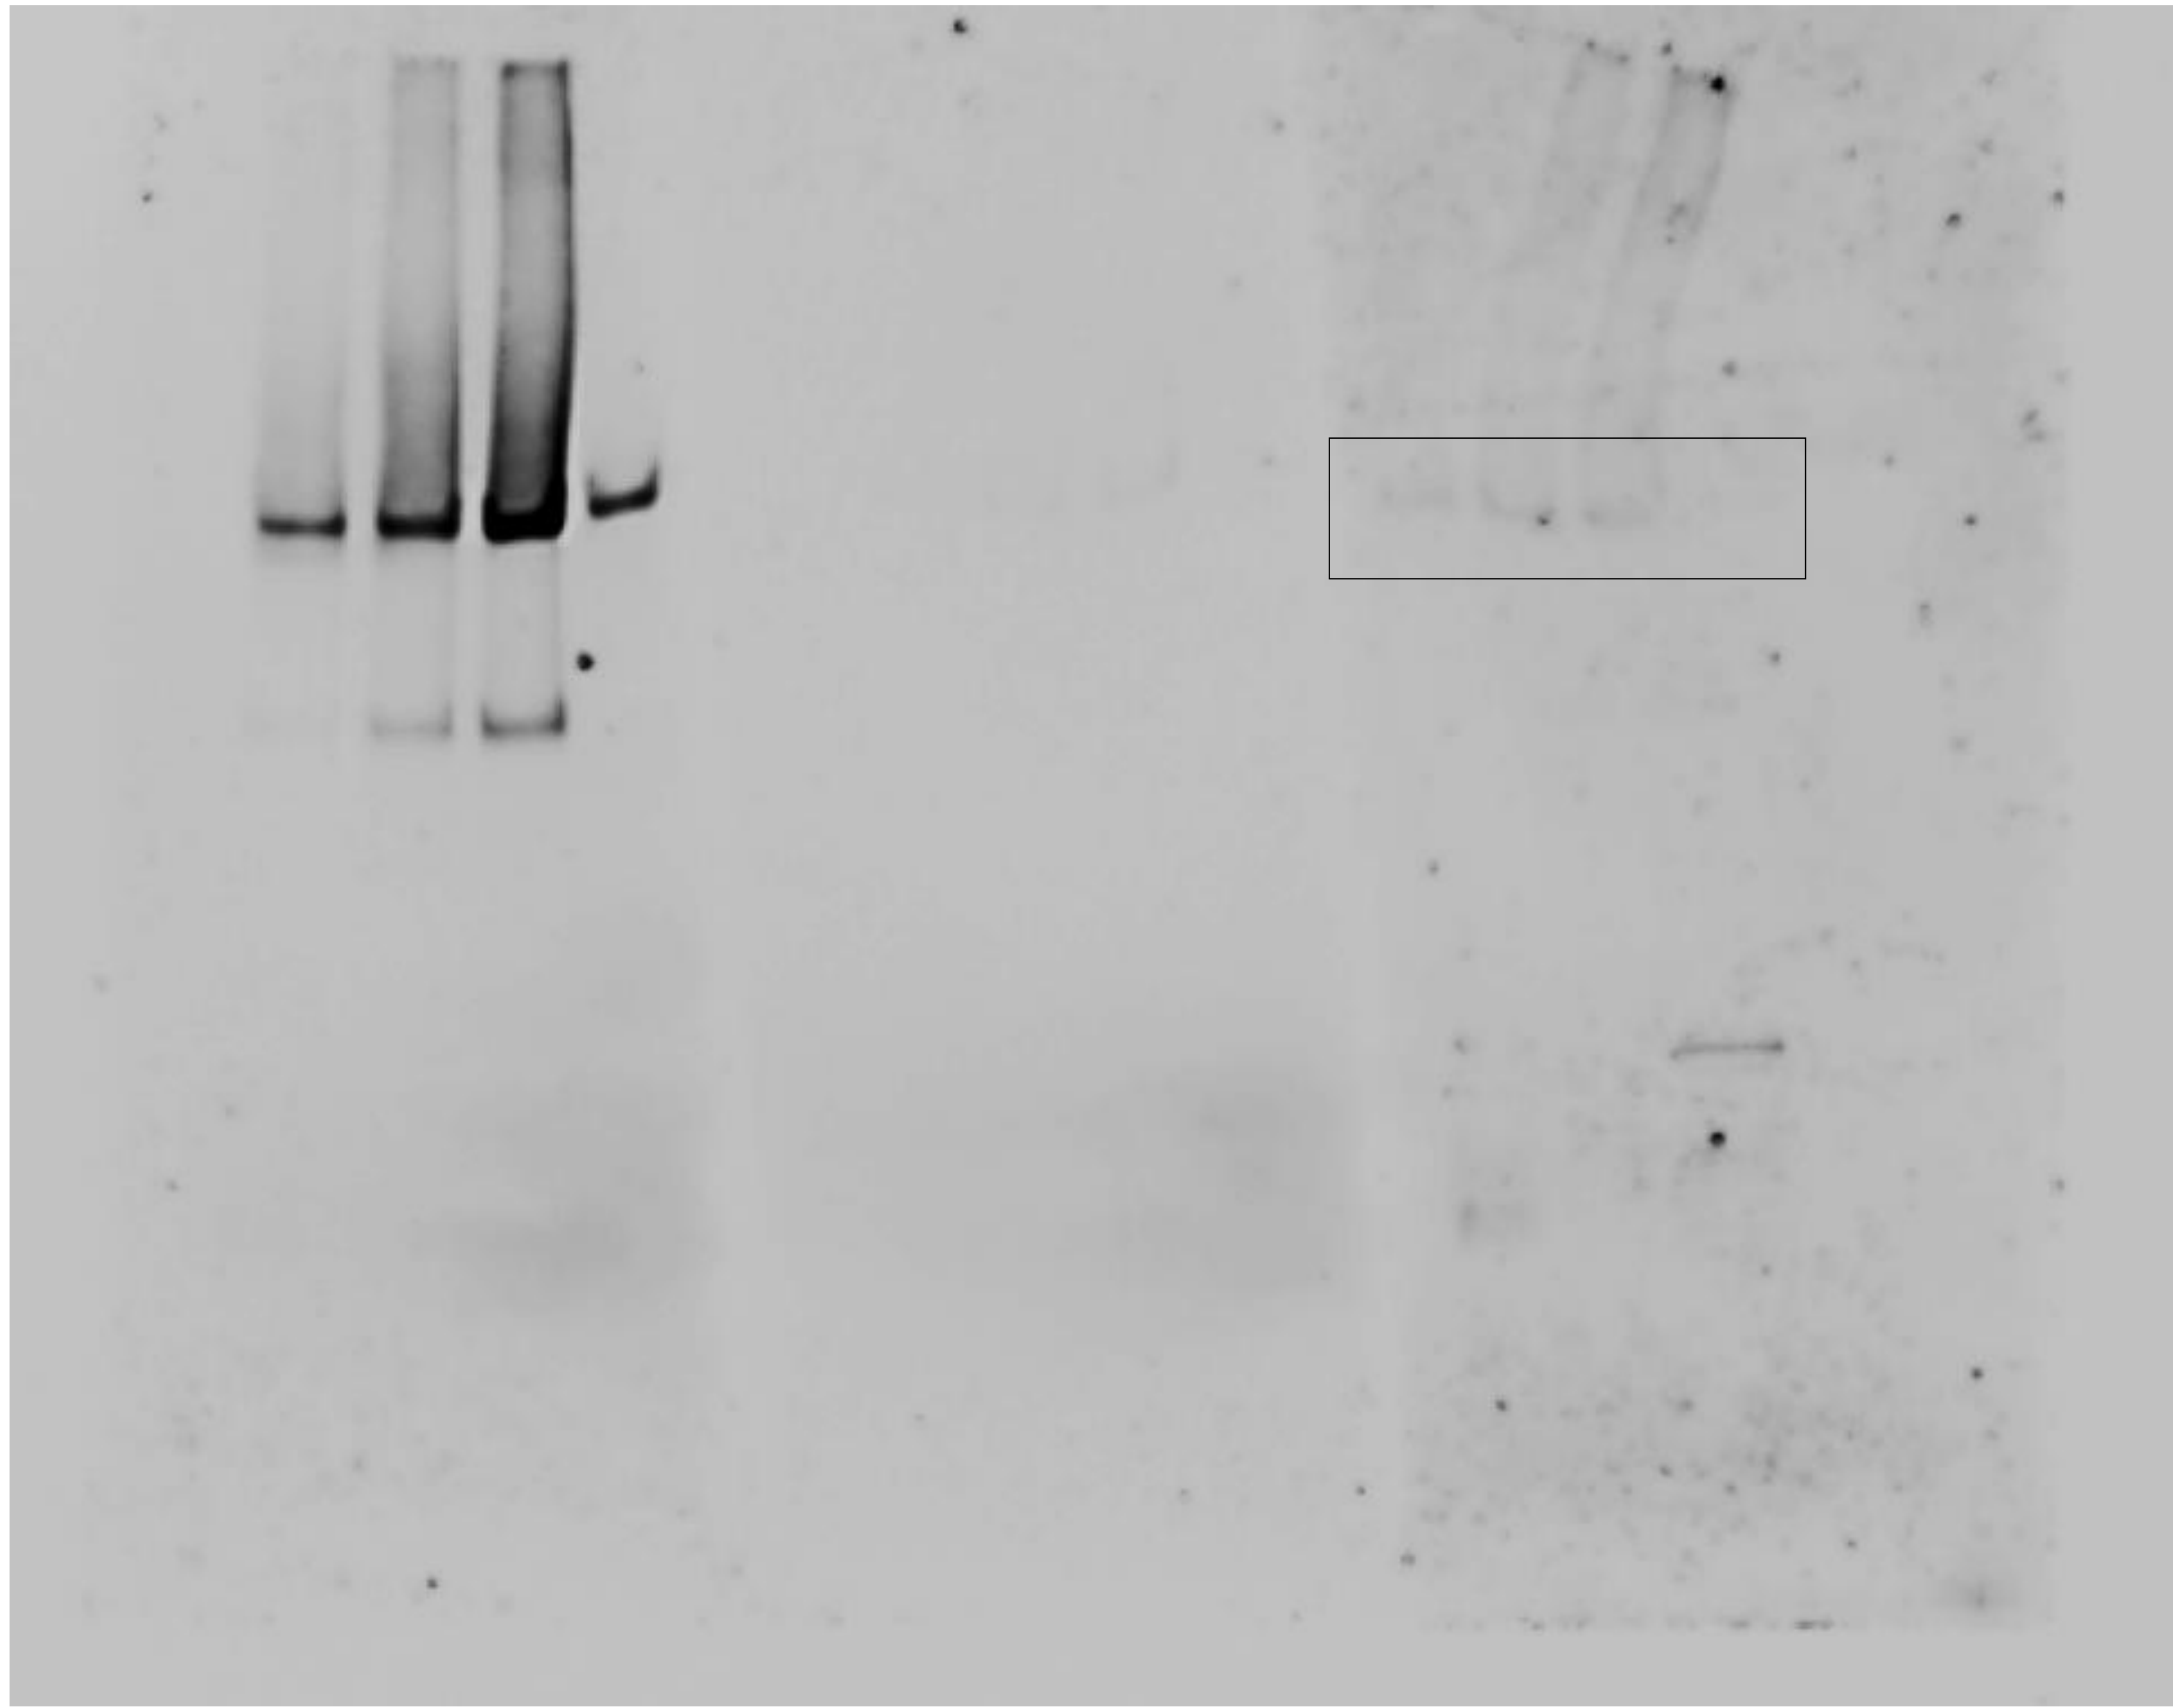

Figure 1d

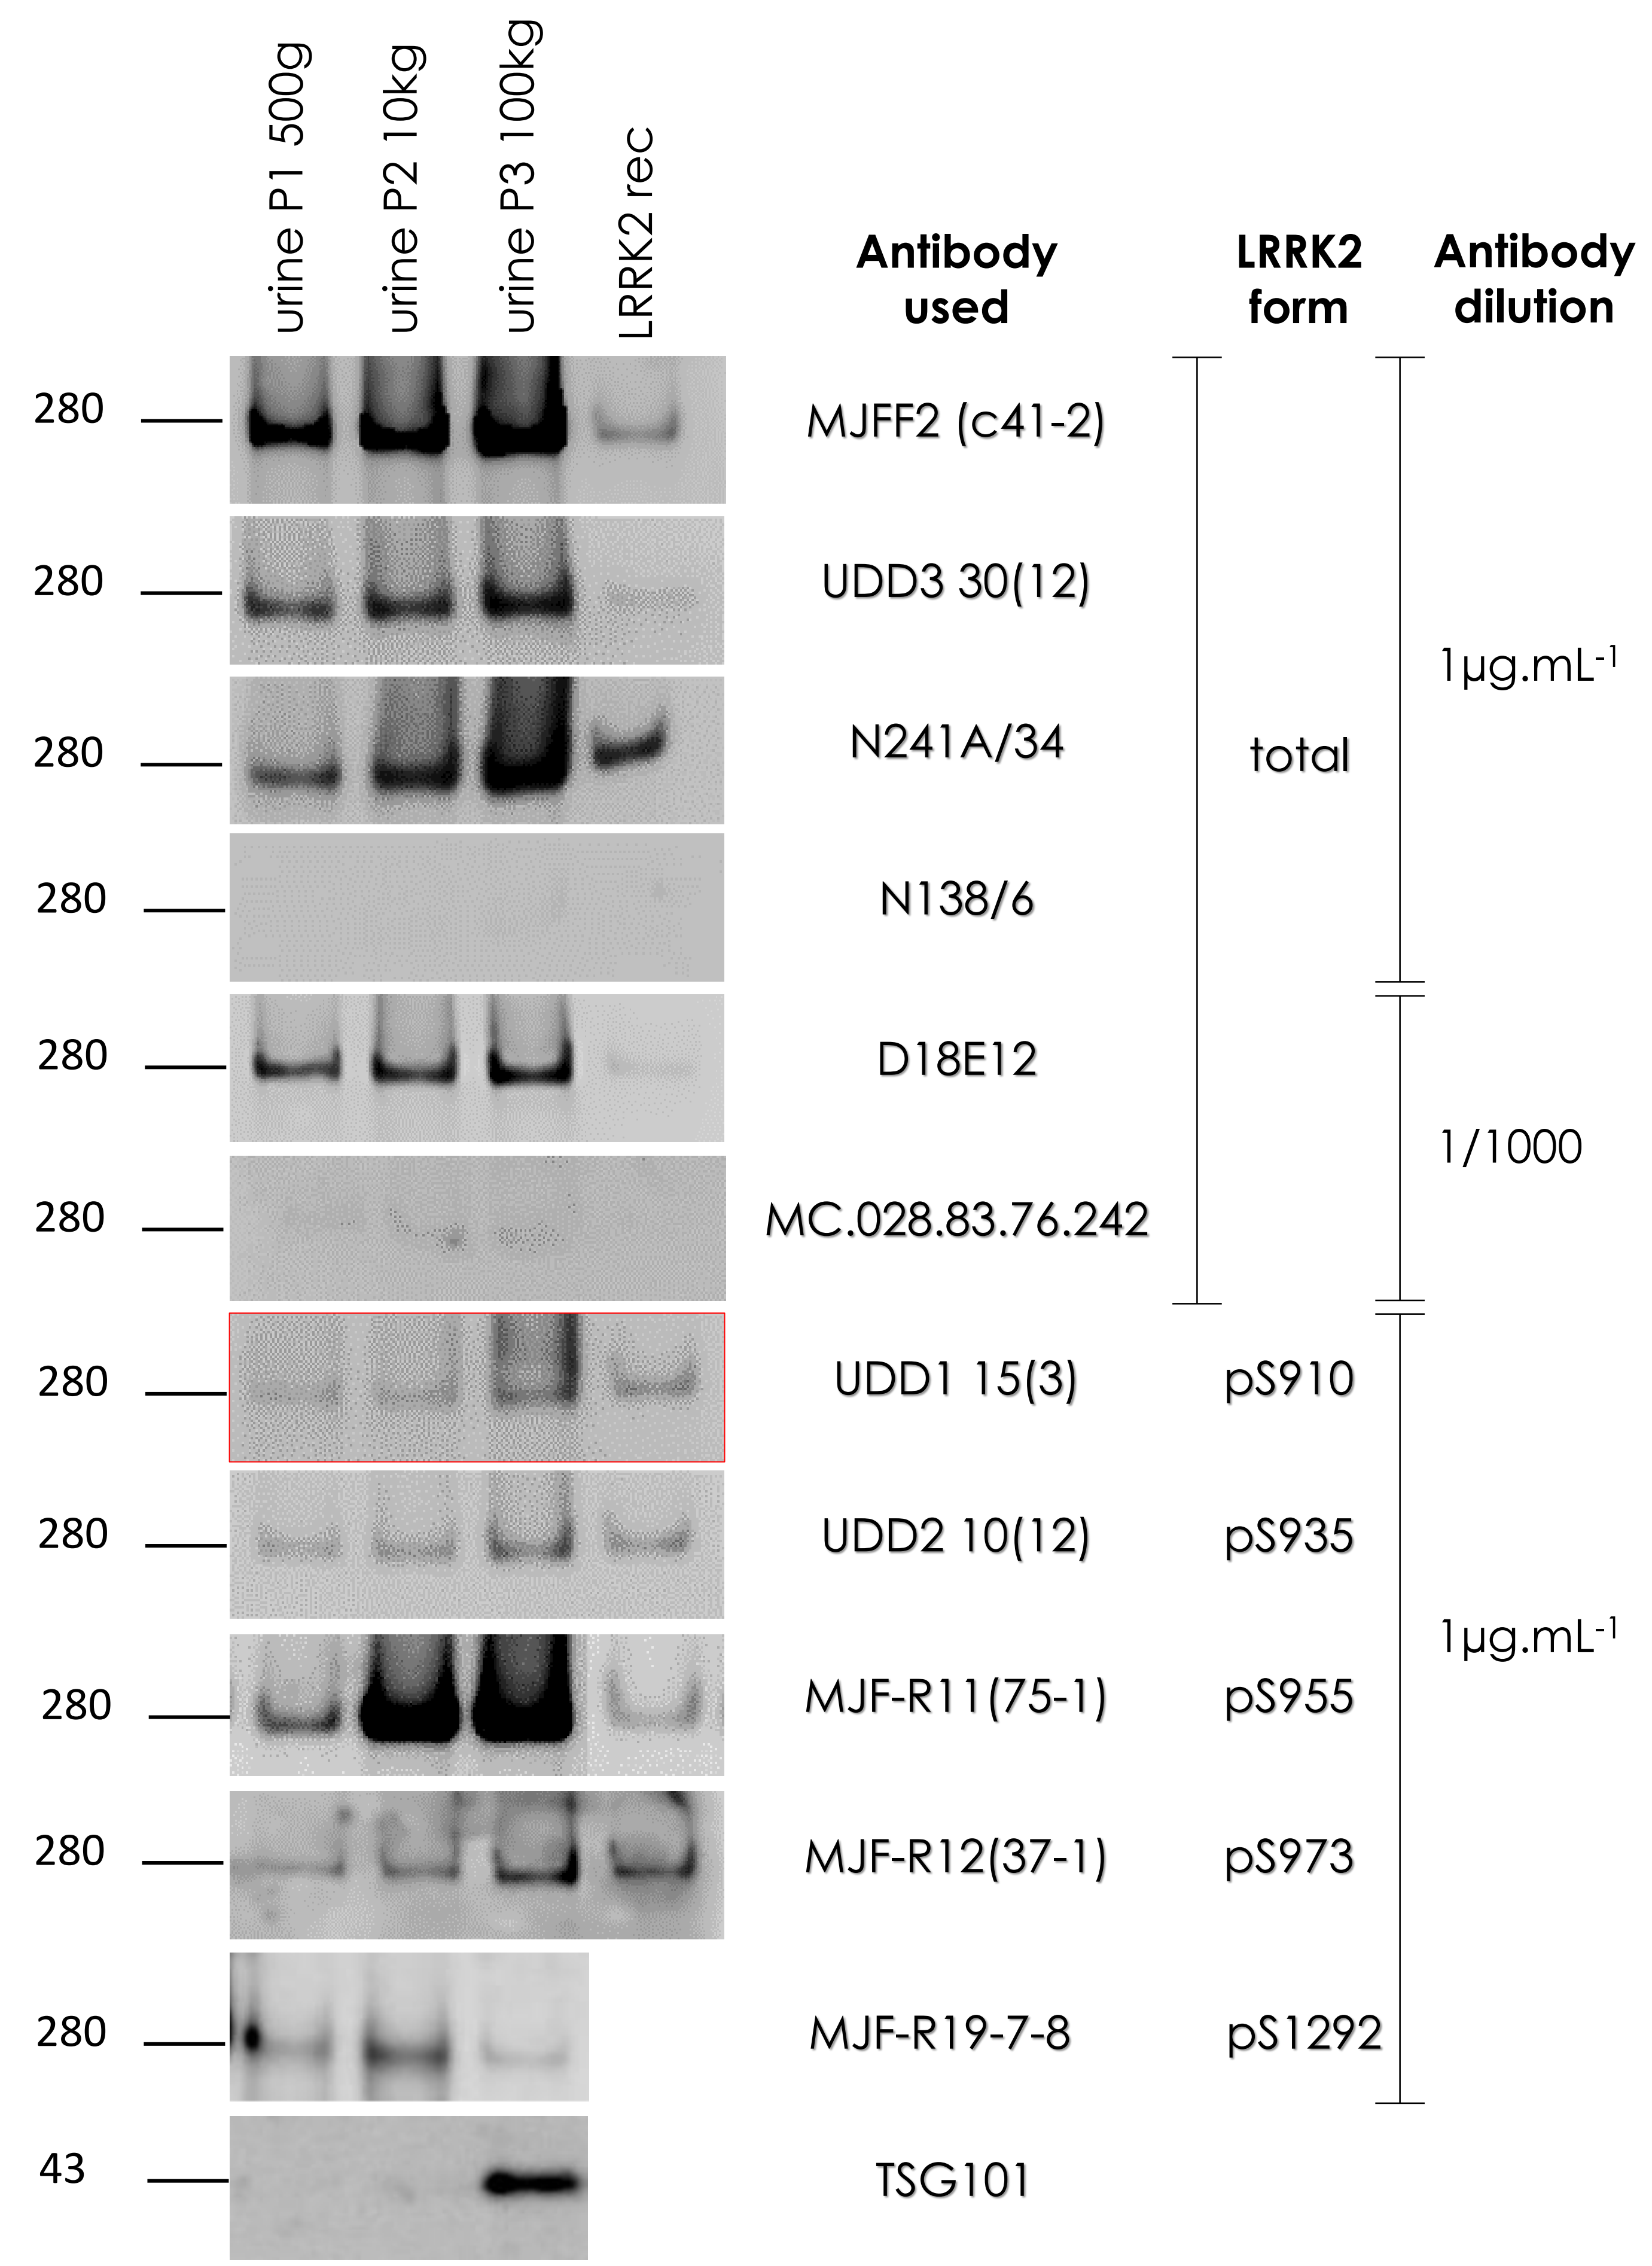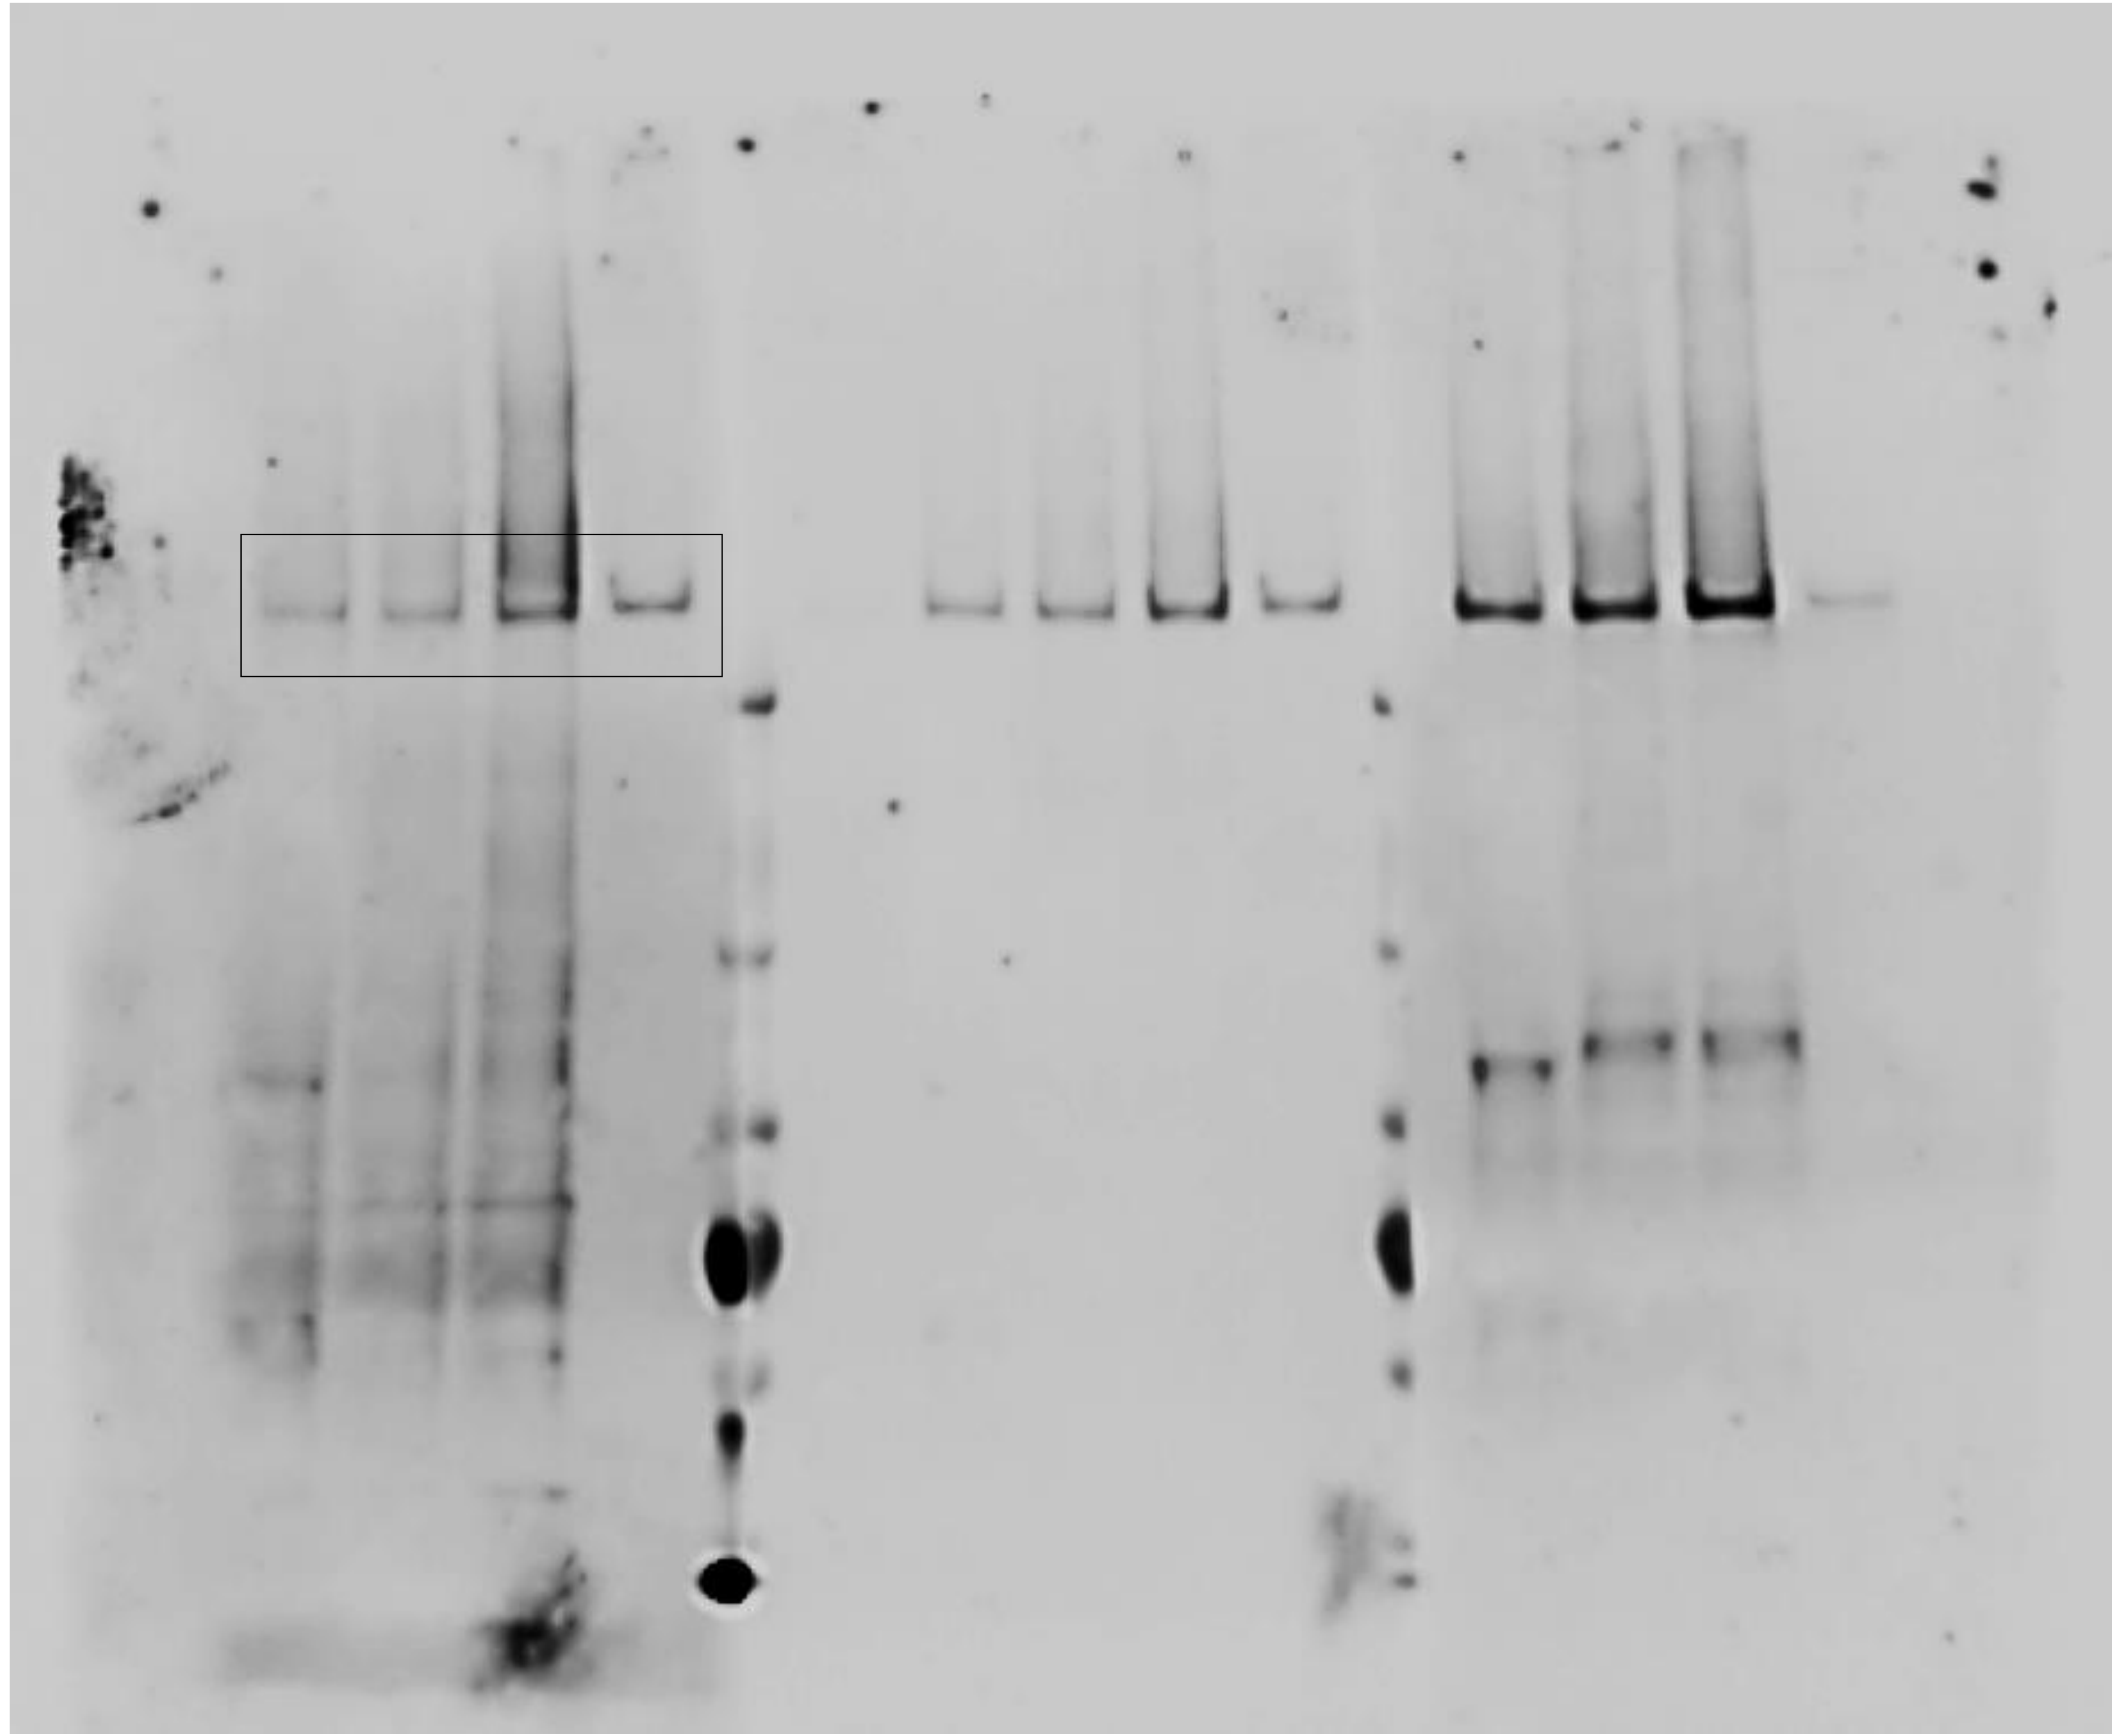

Figure 1d

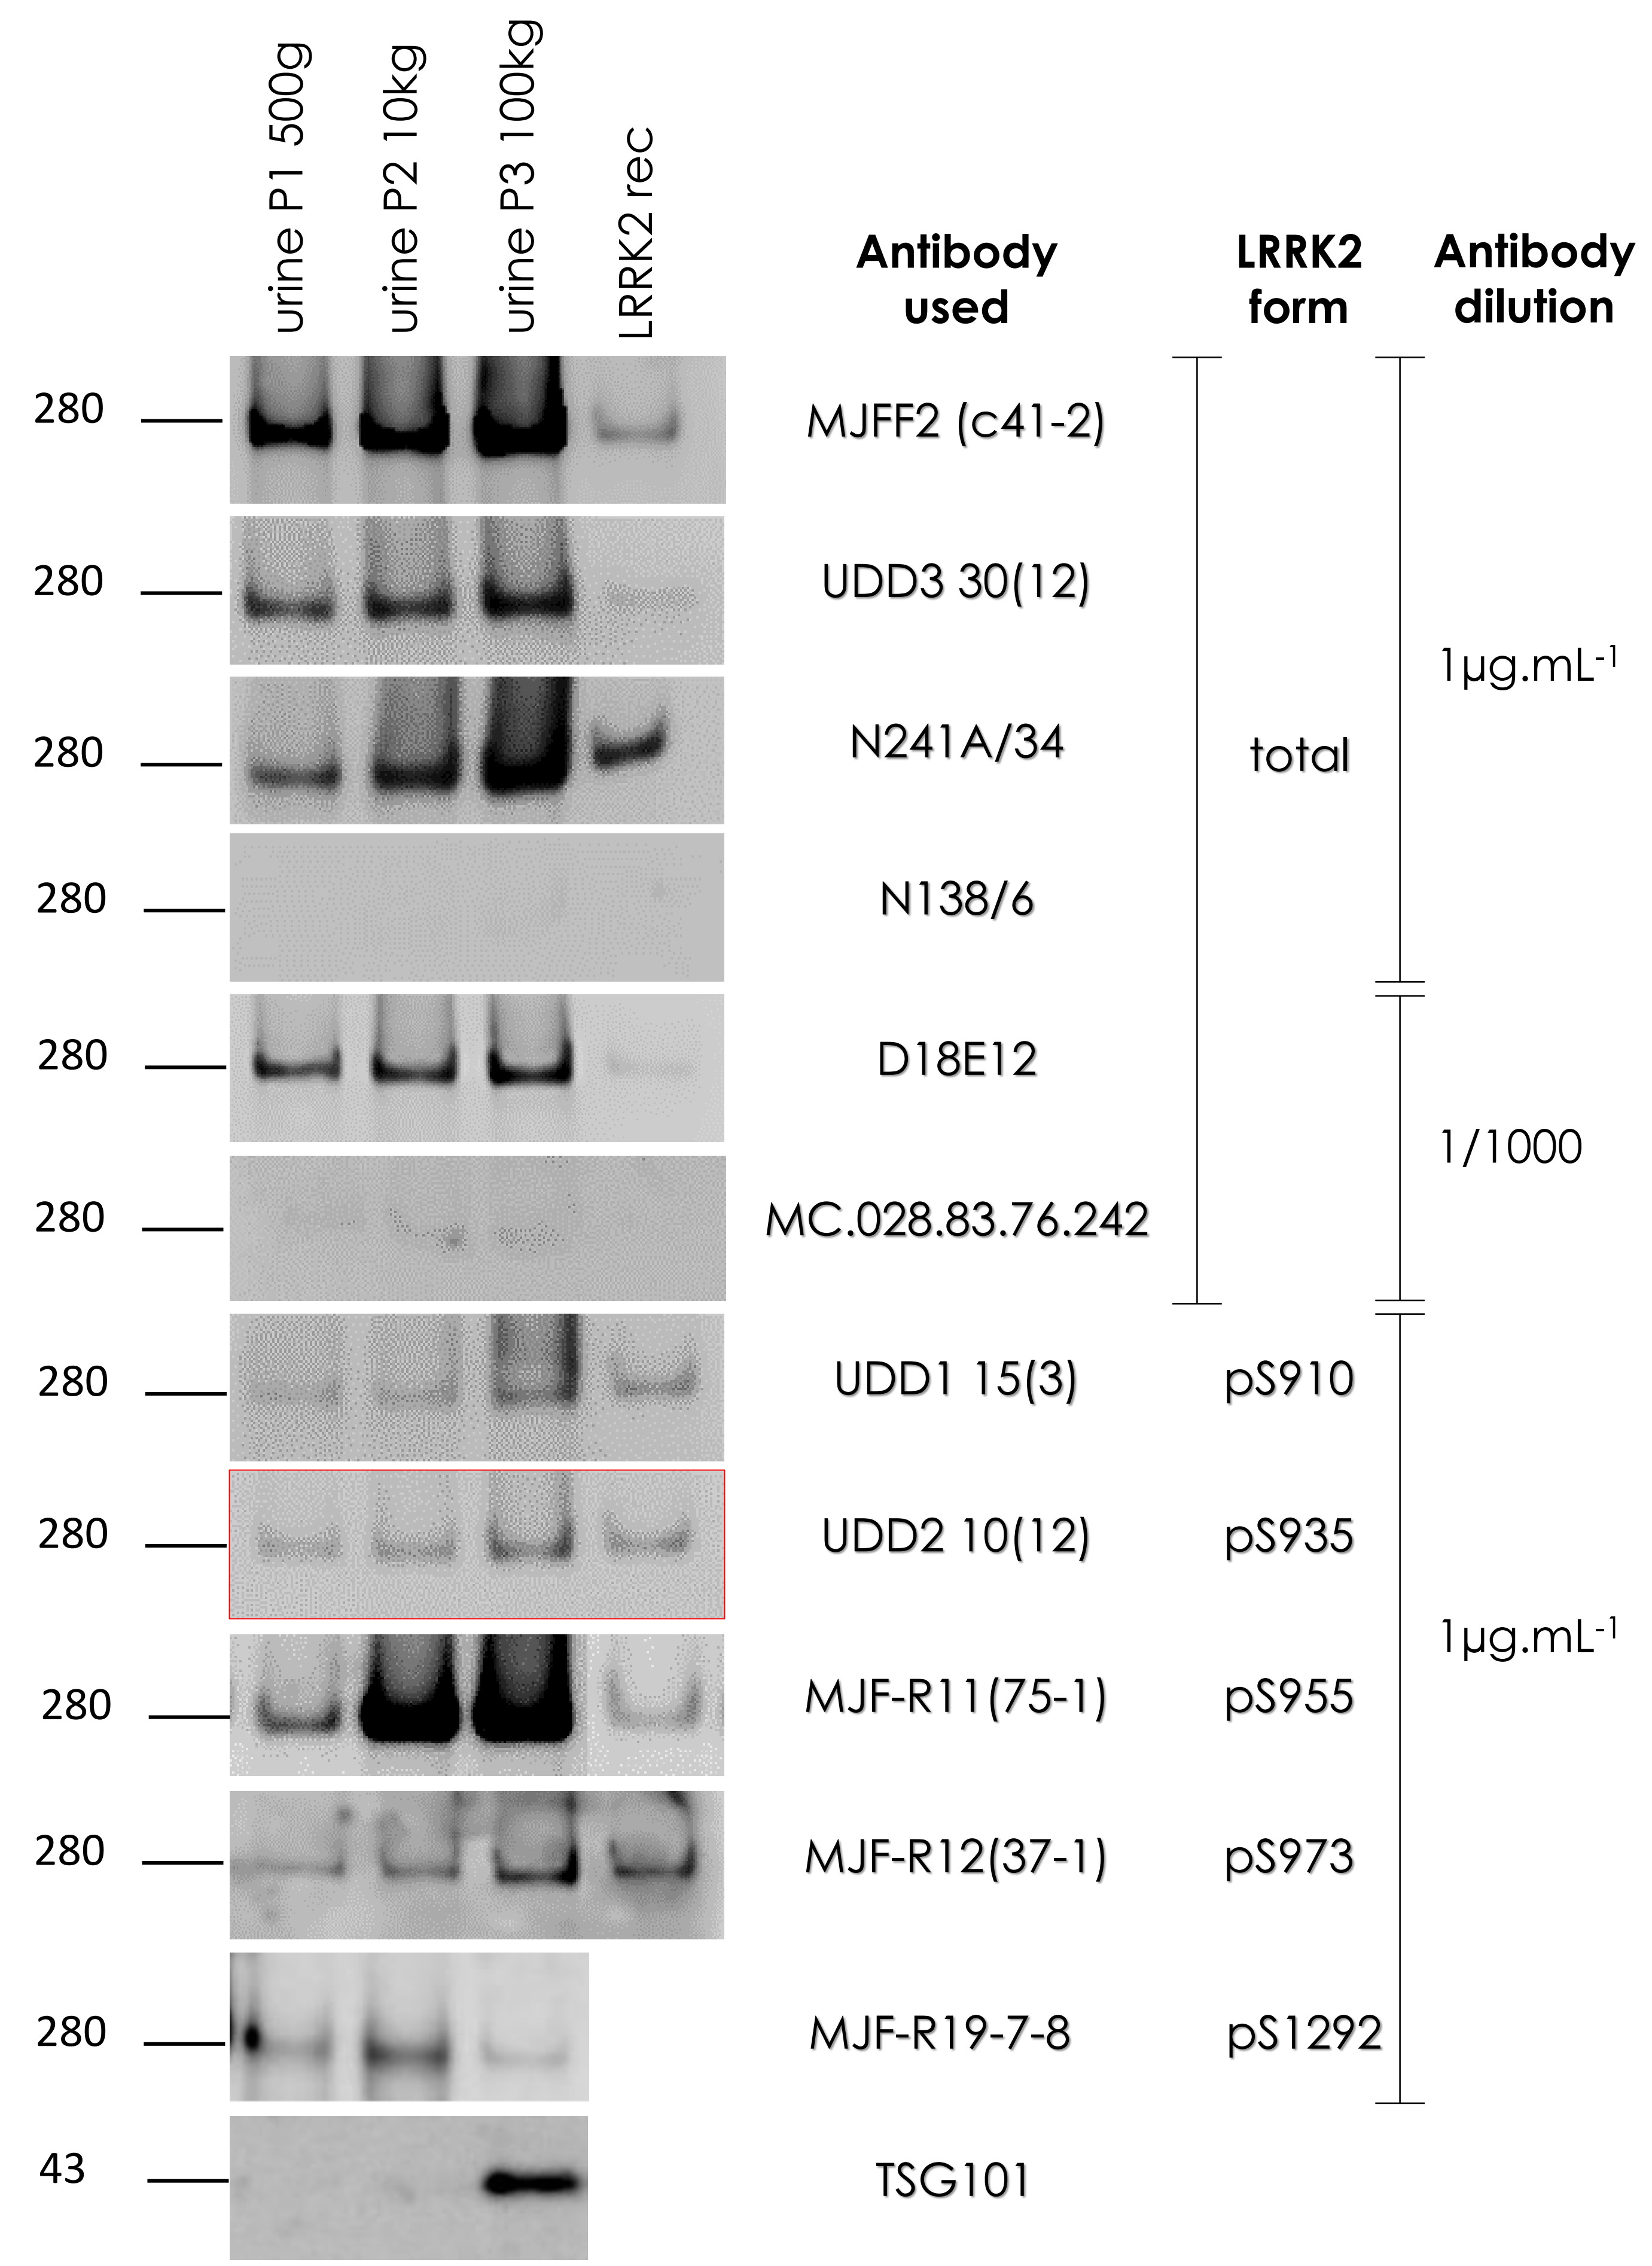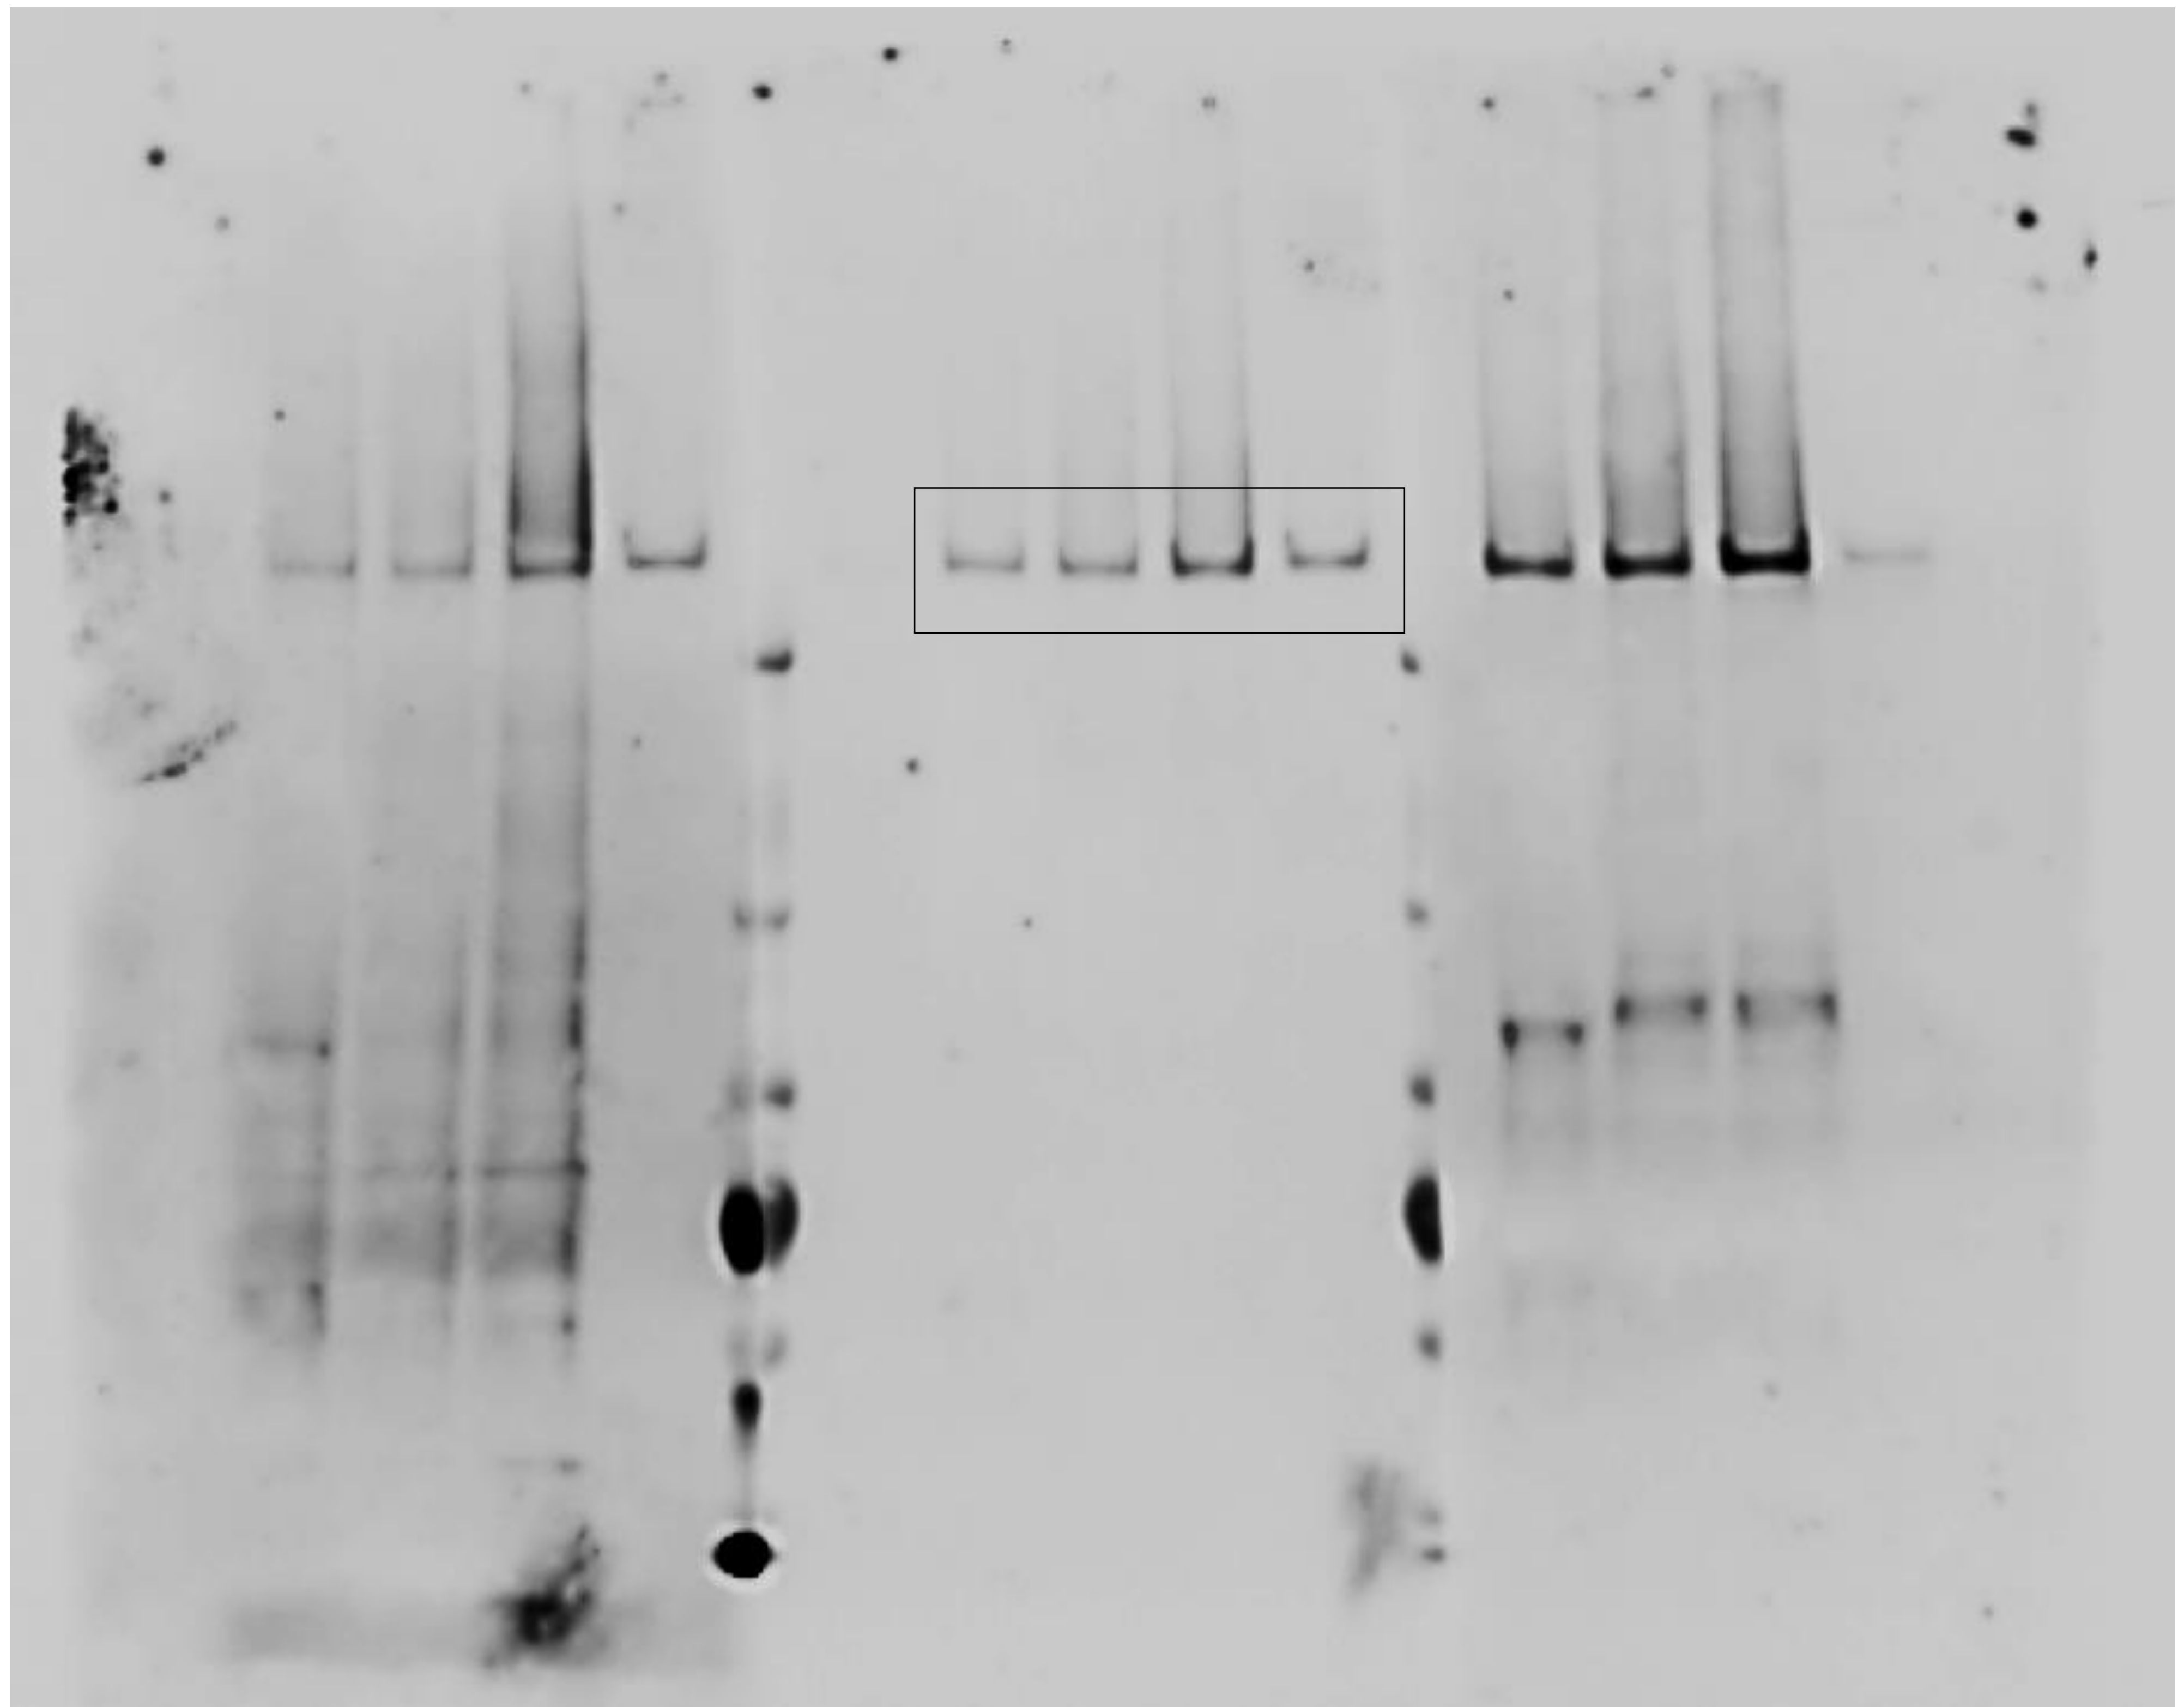



Figure 1d

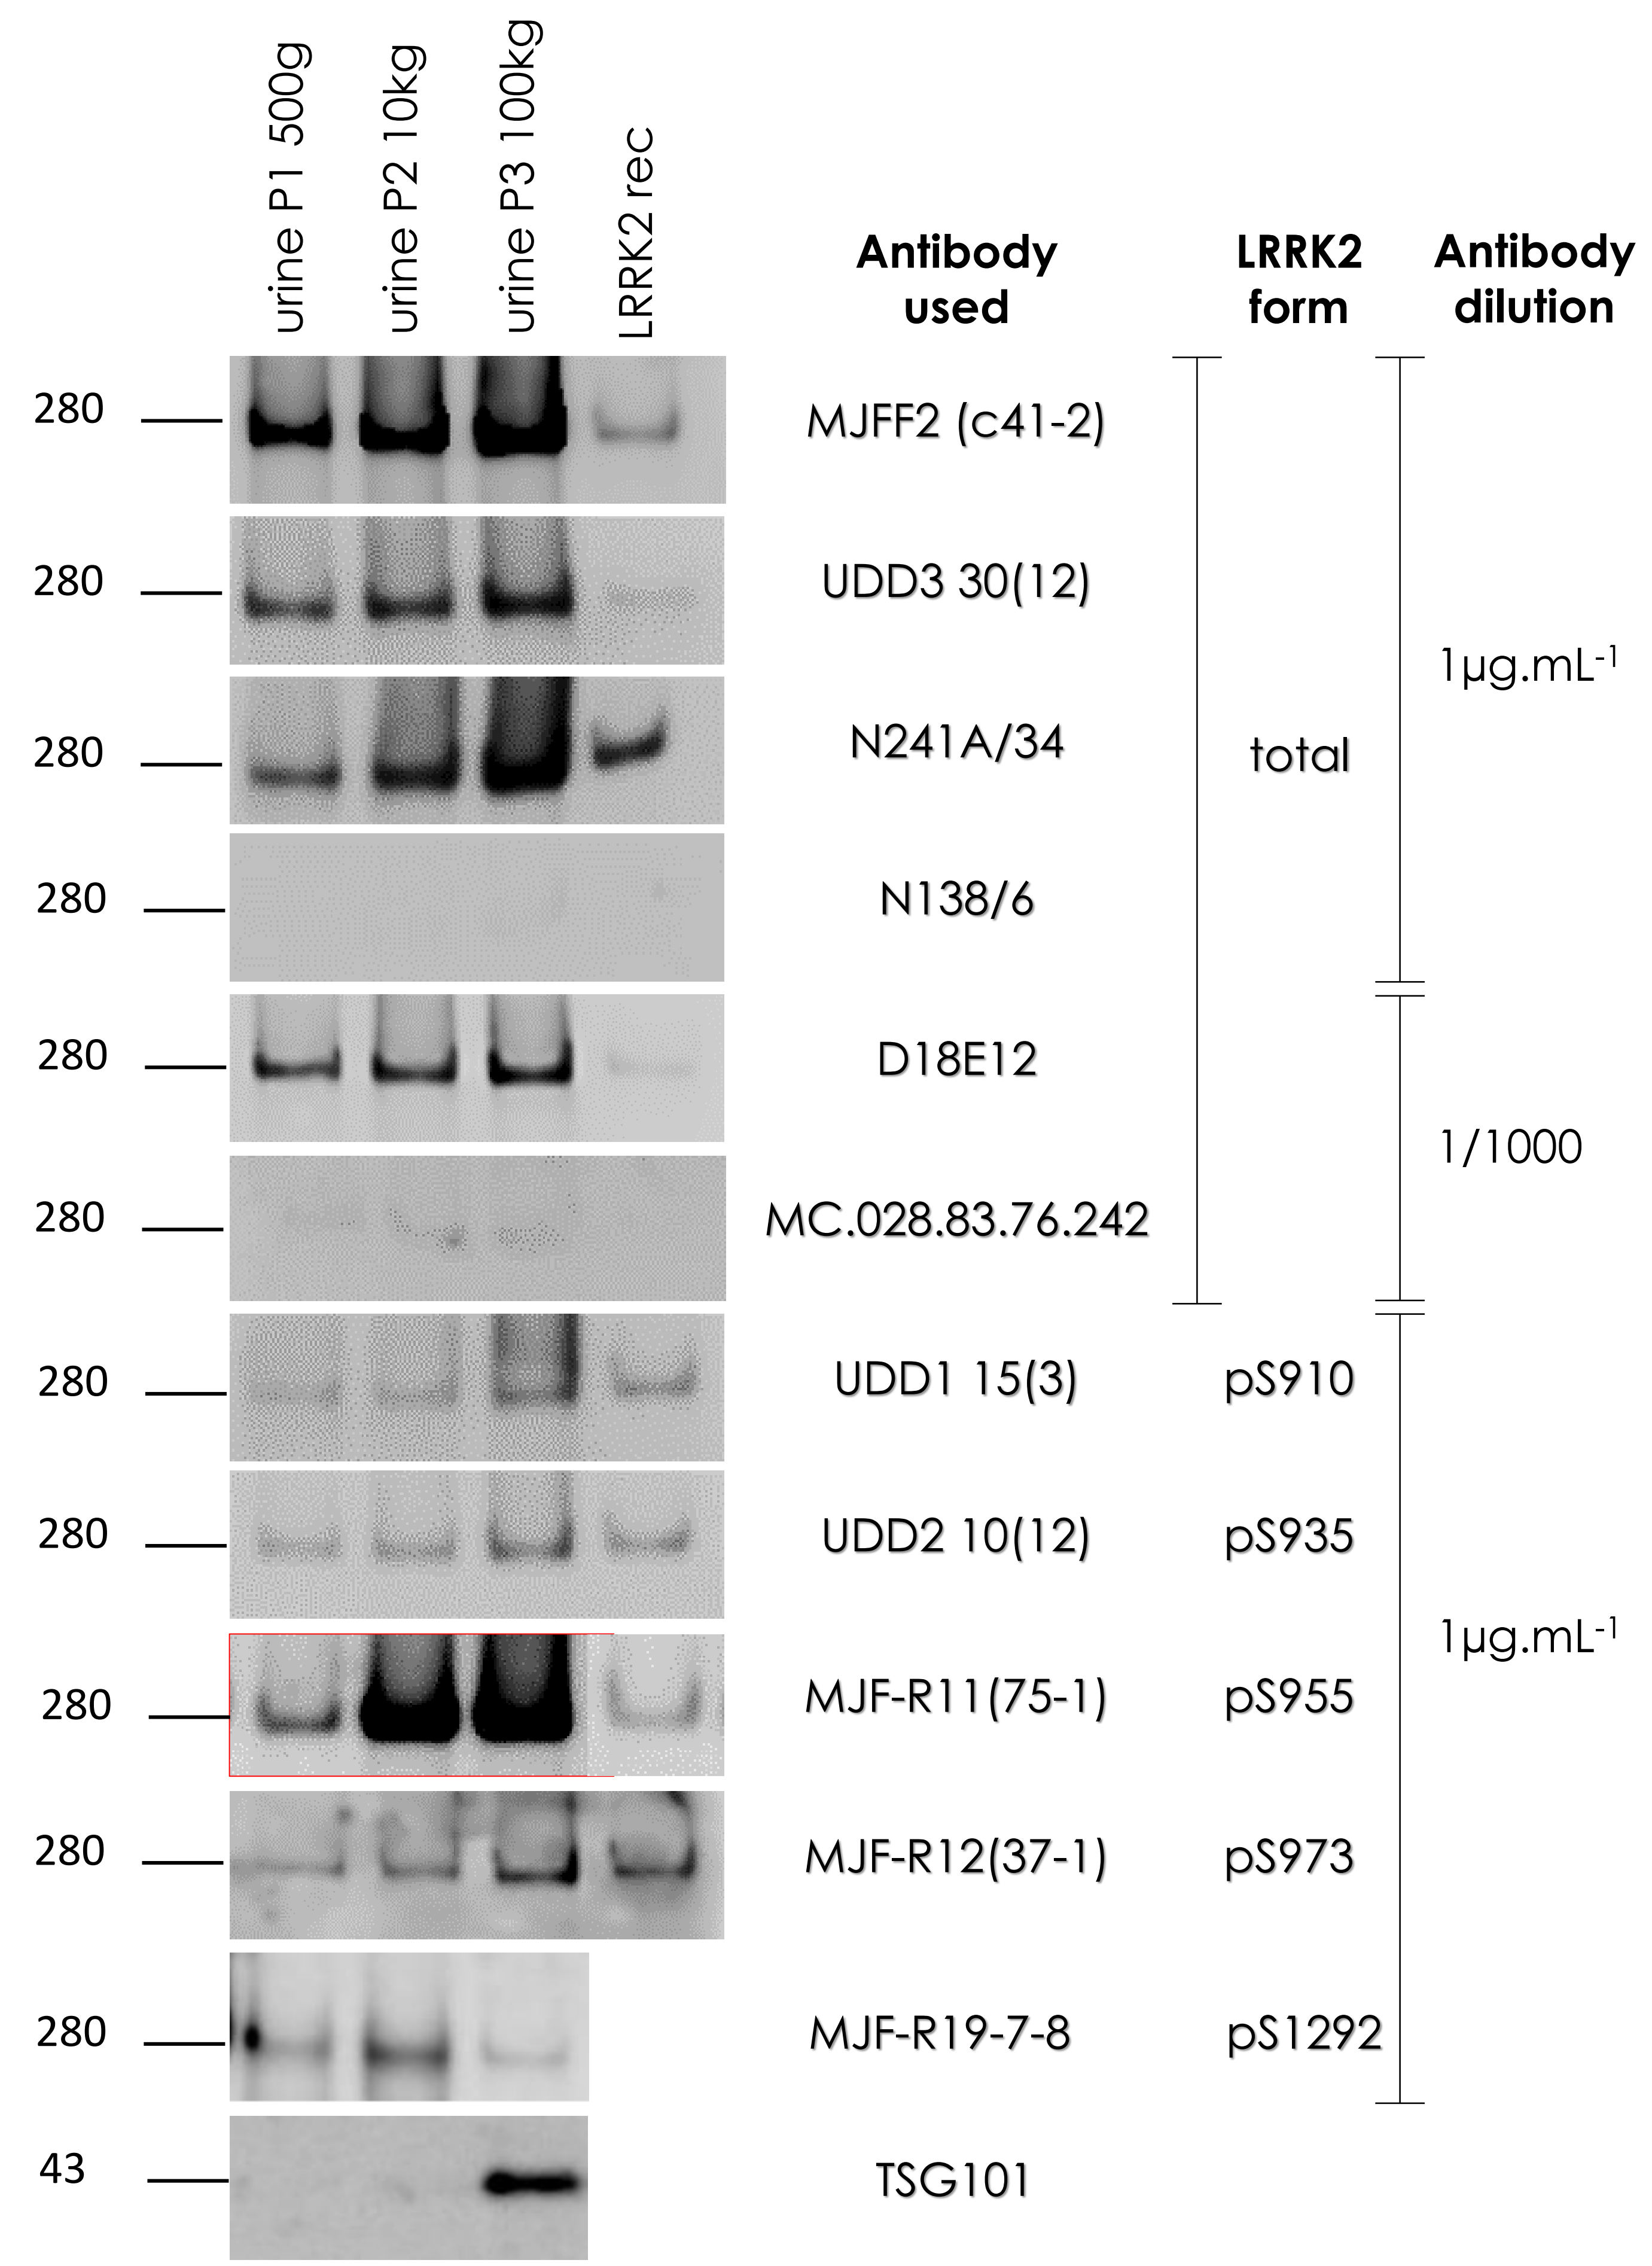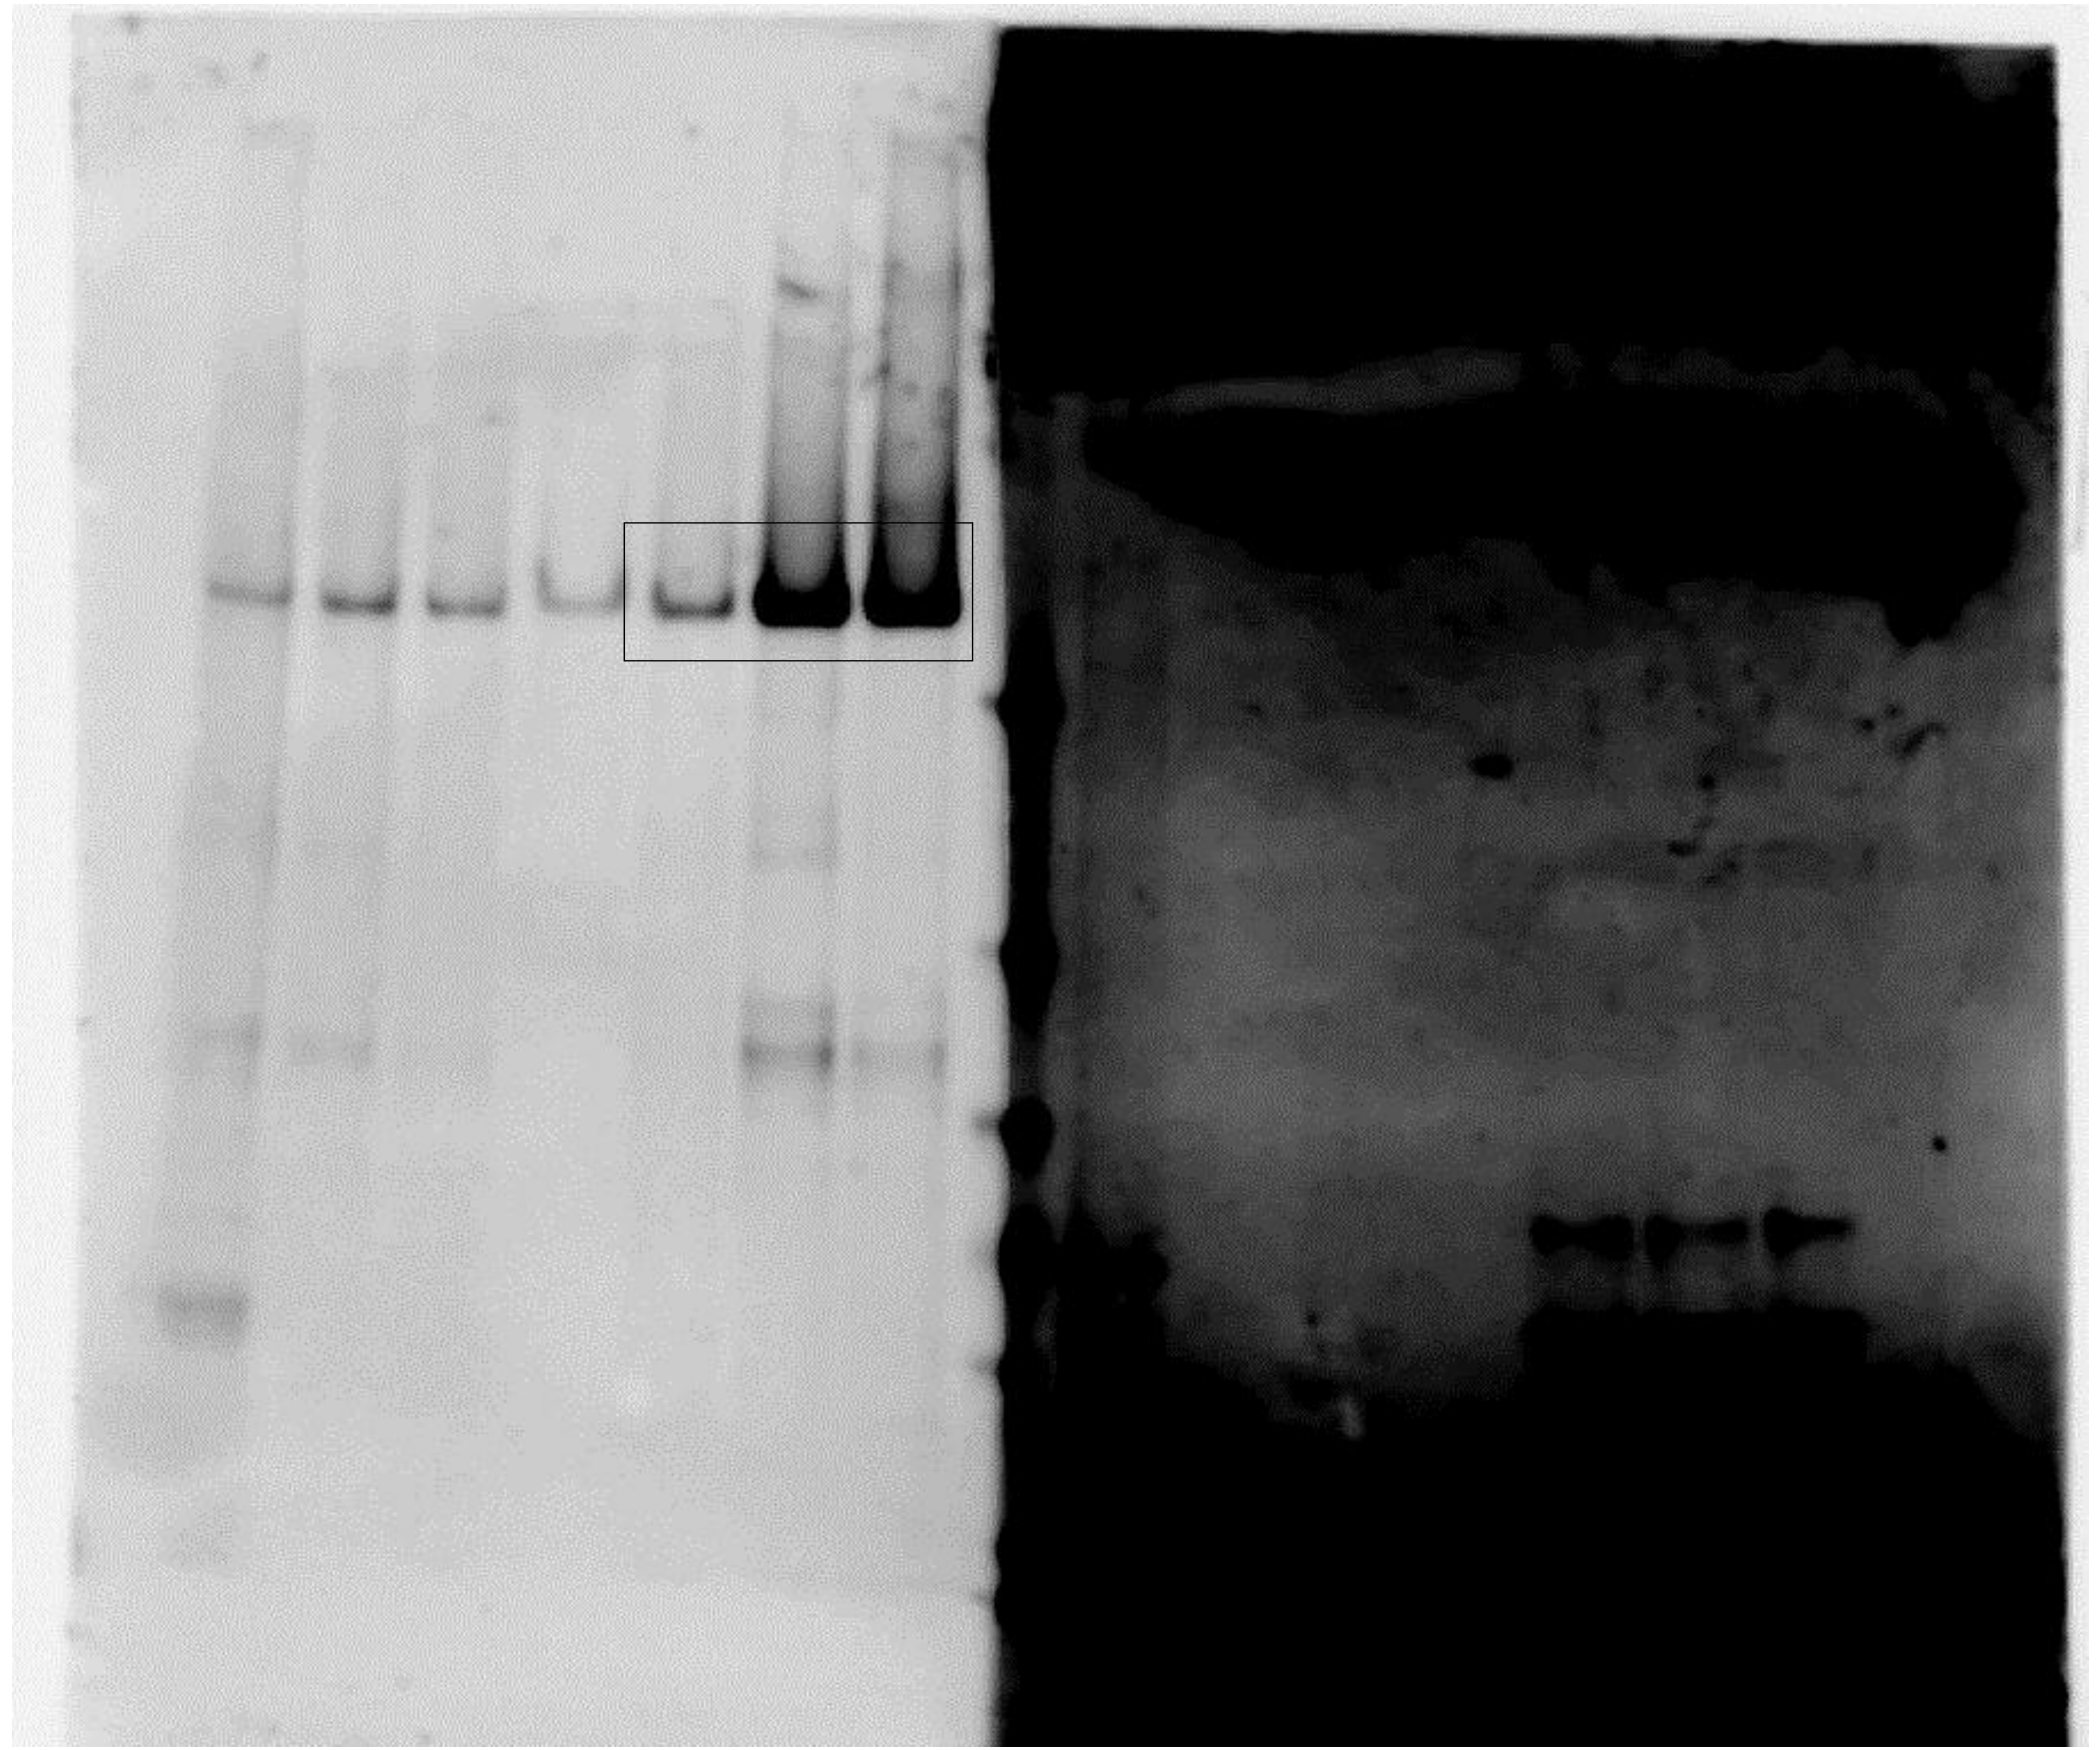

Figure 1d

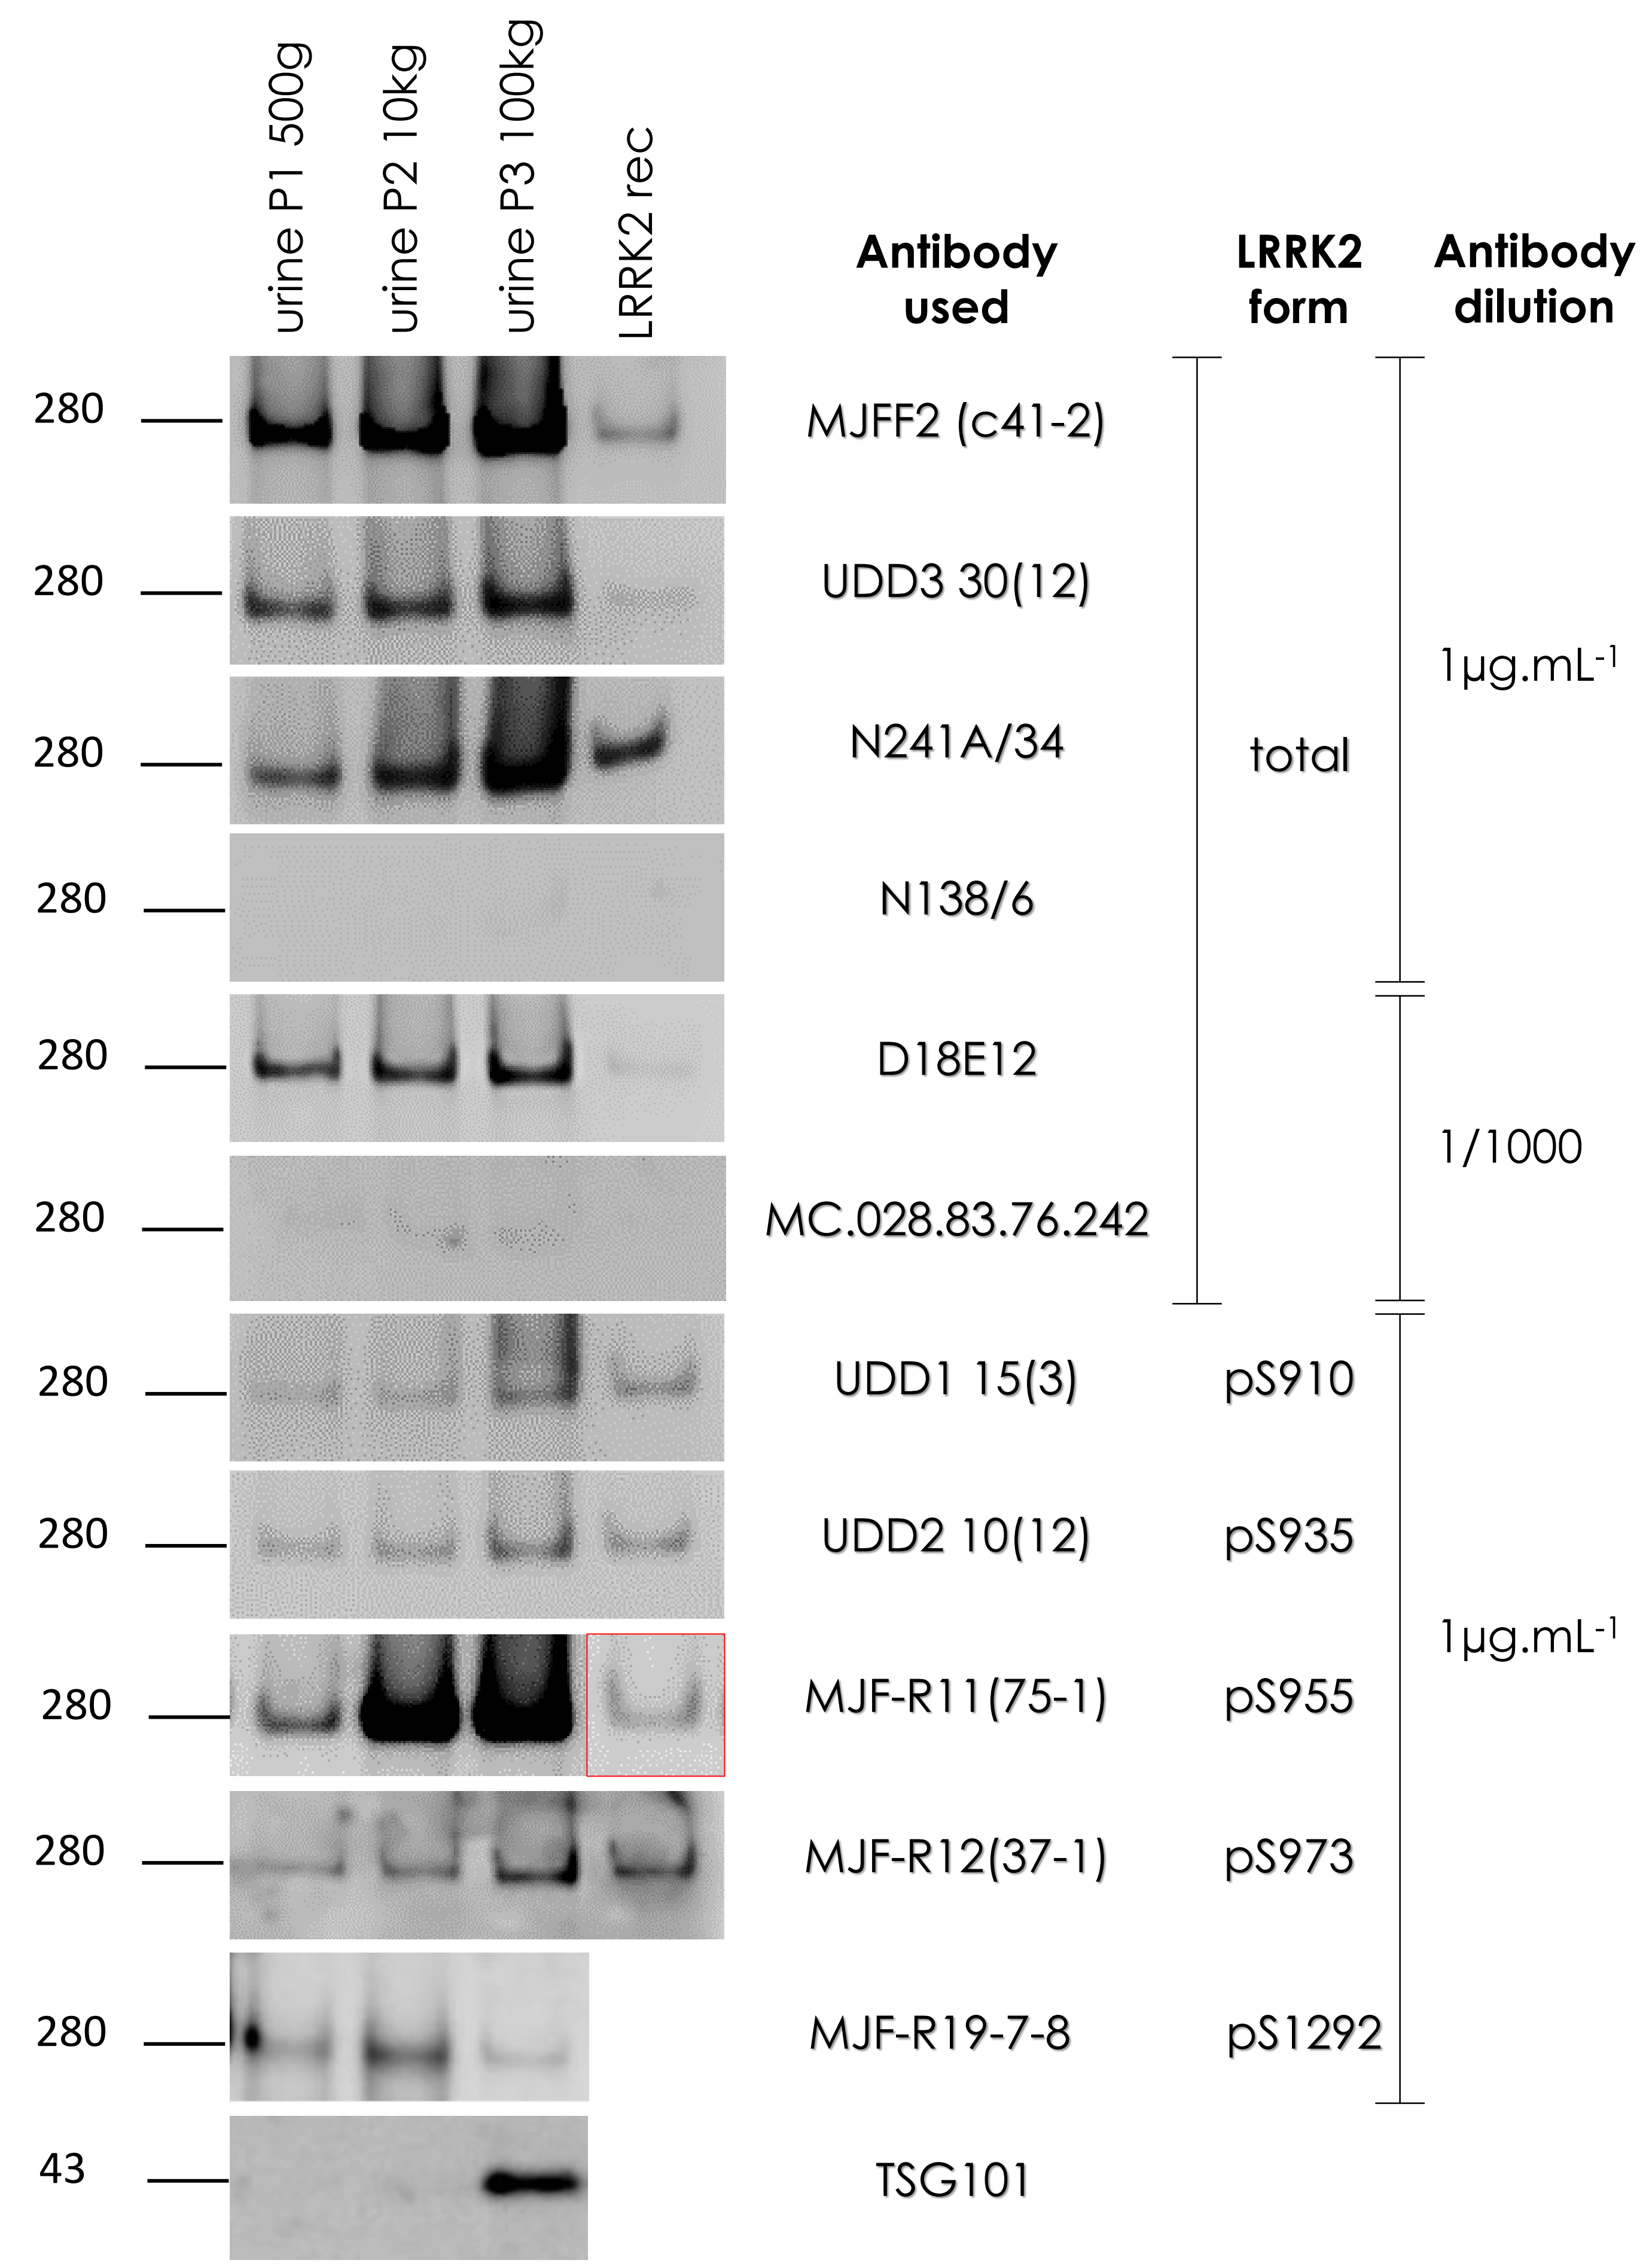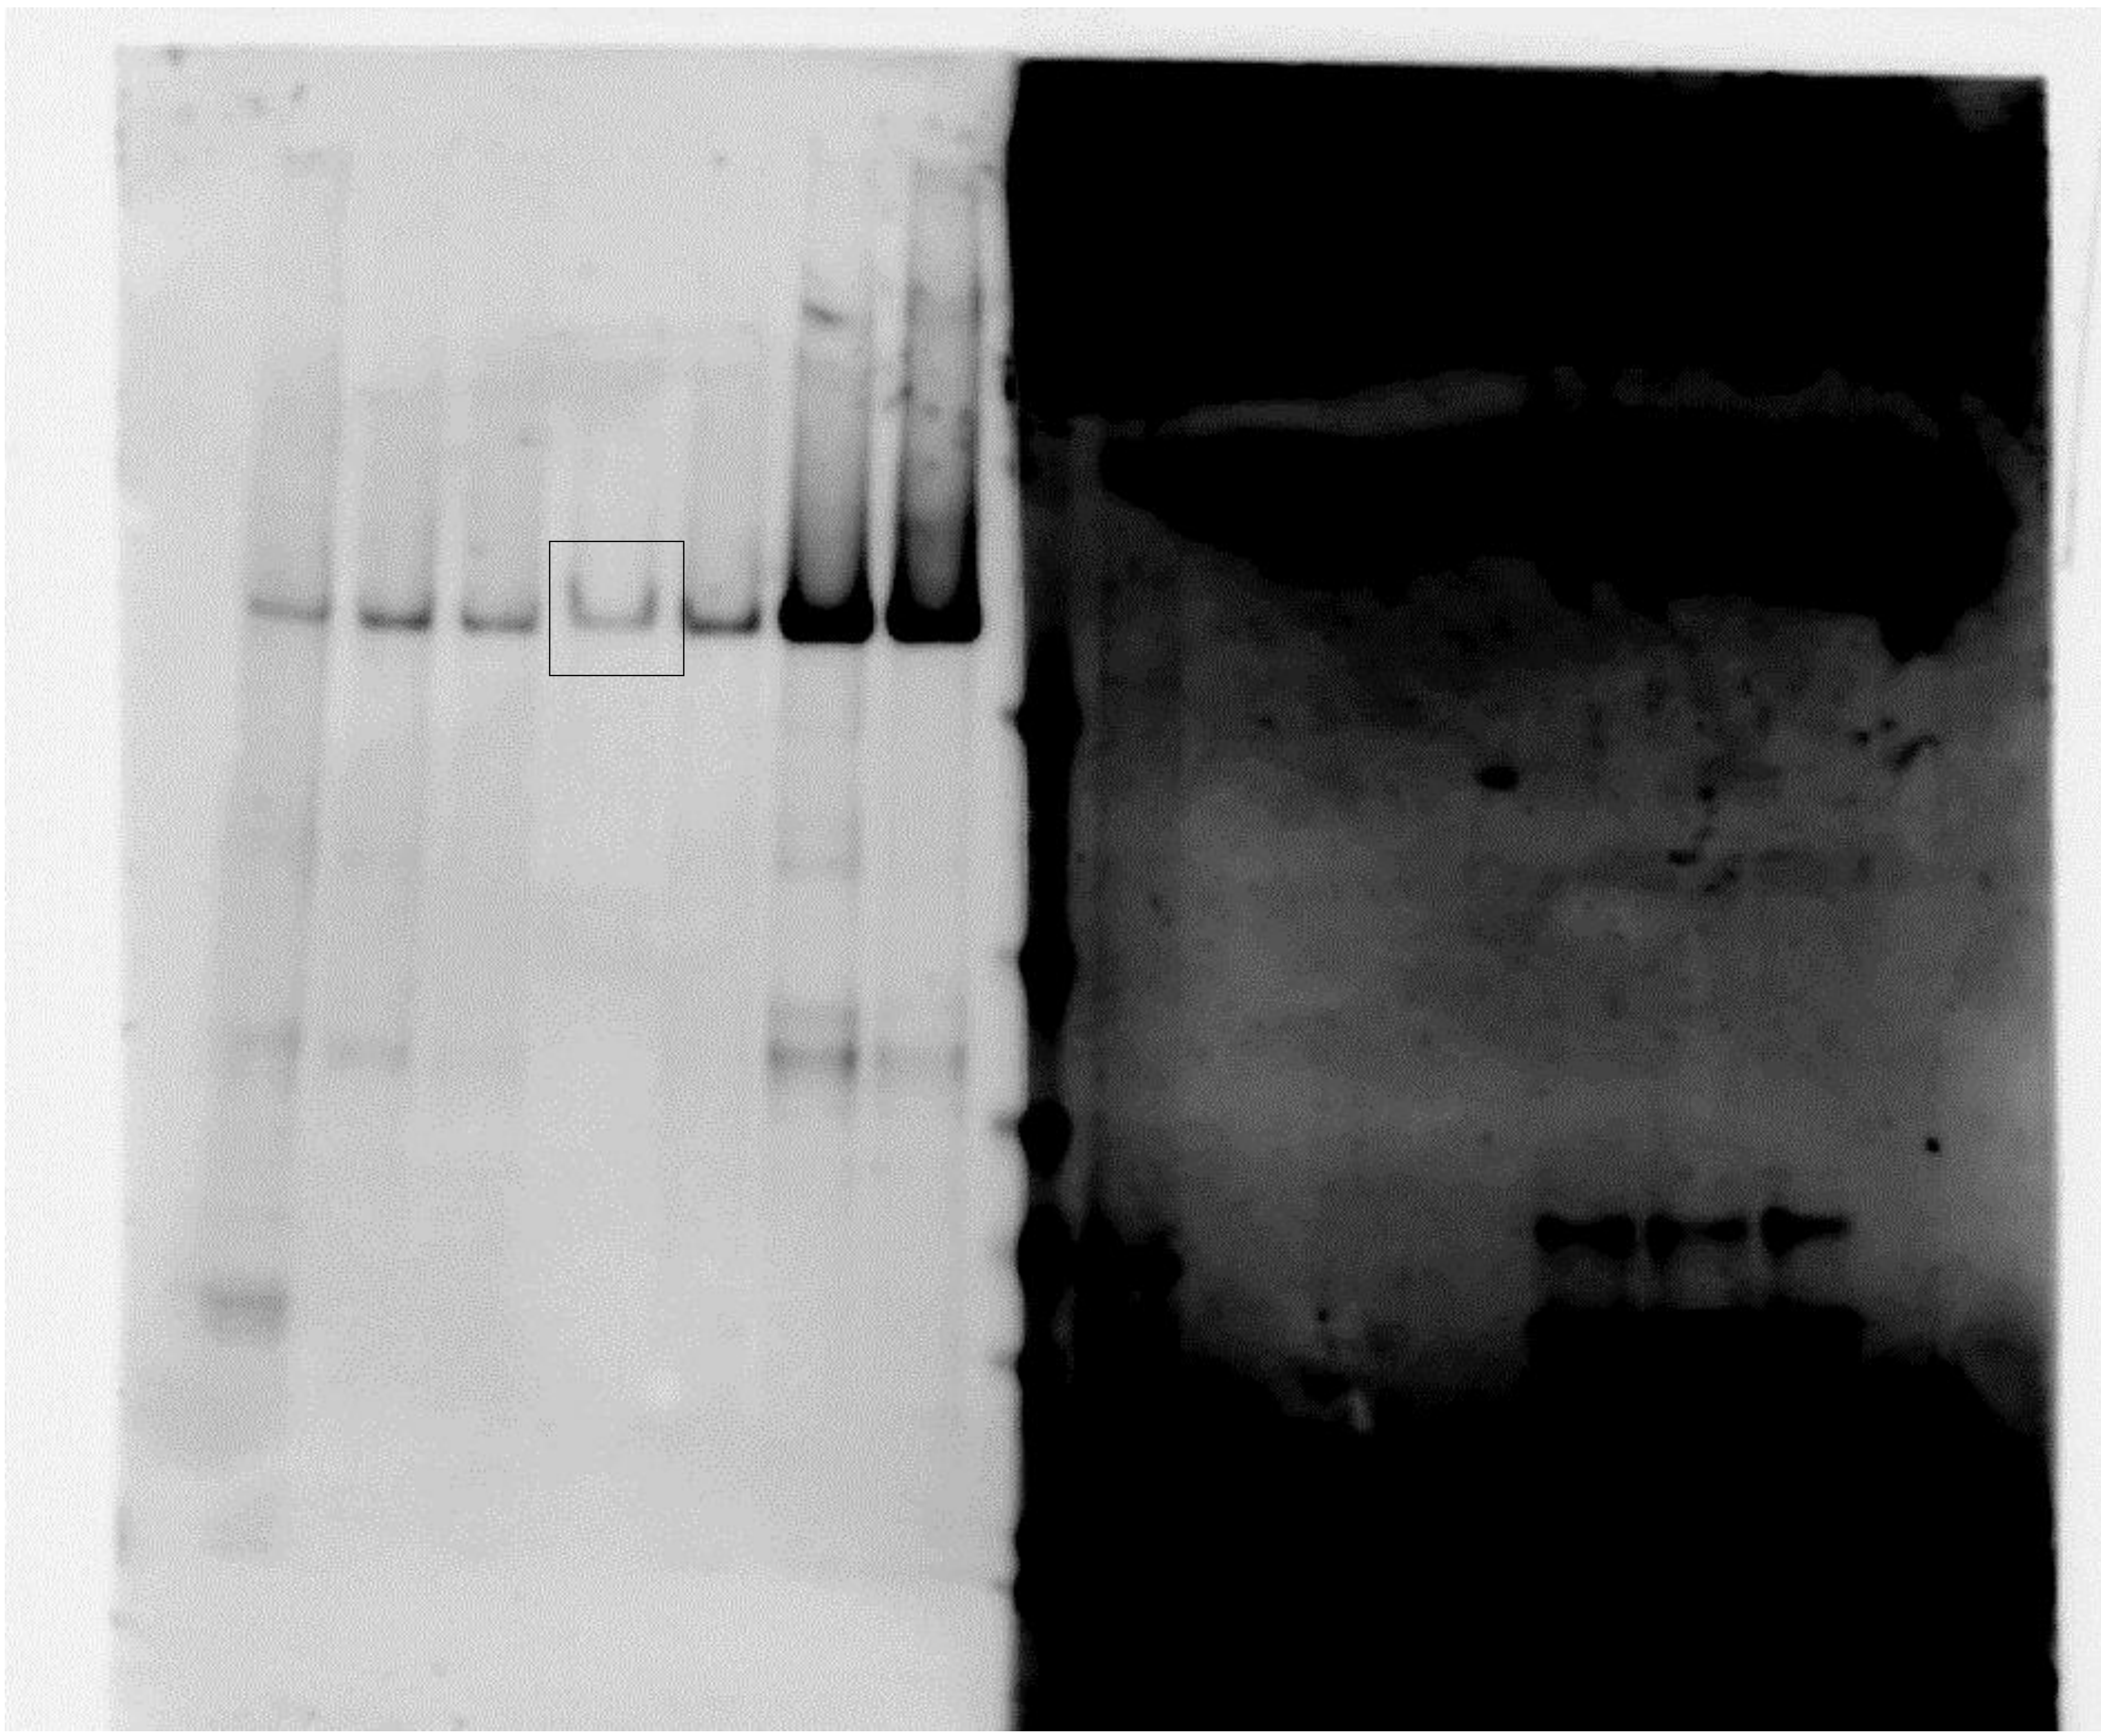

Figure 1d

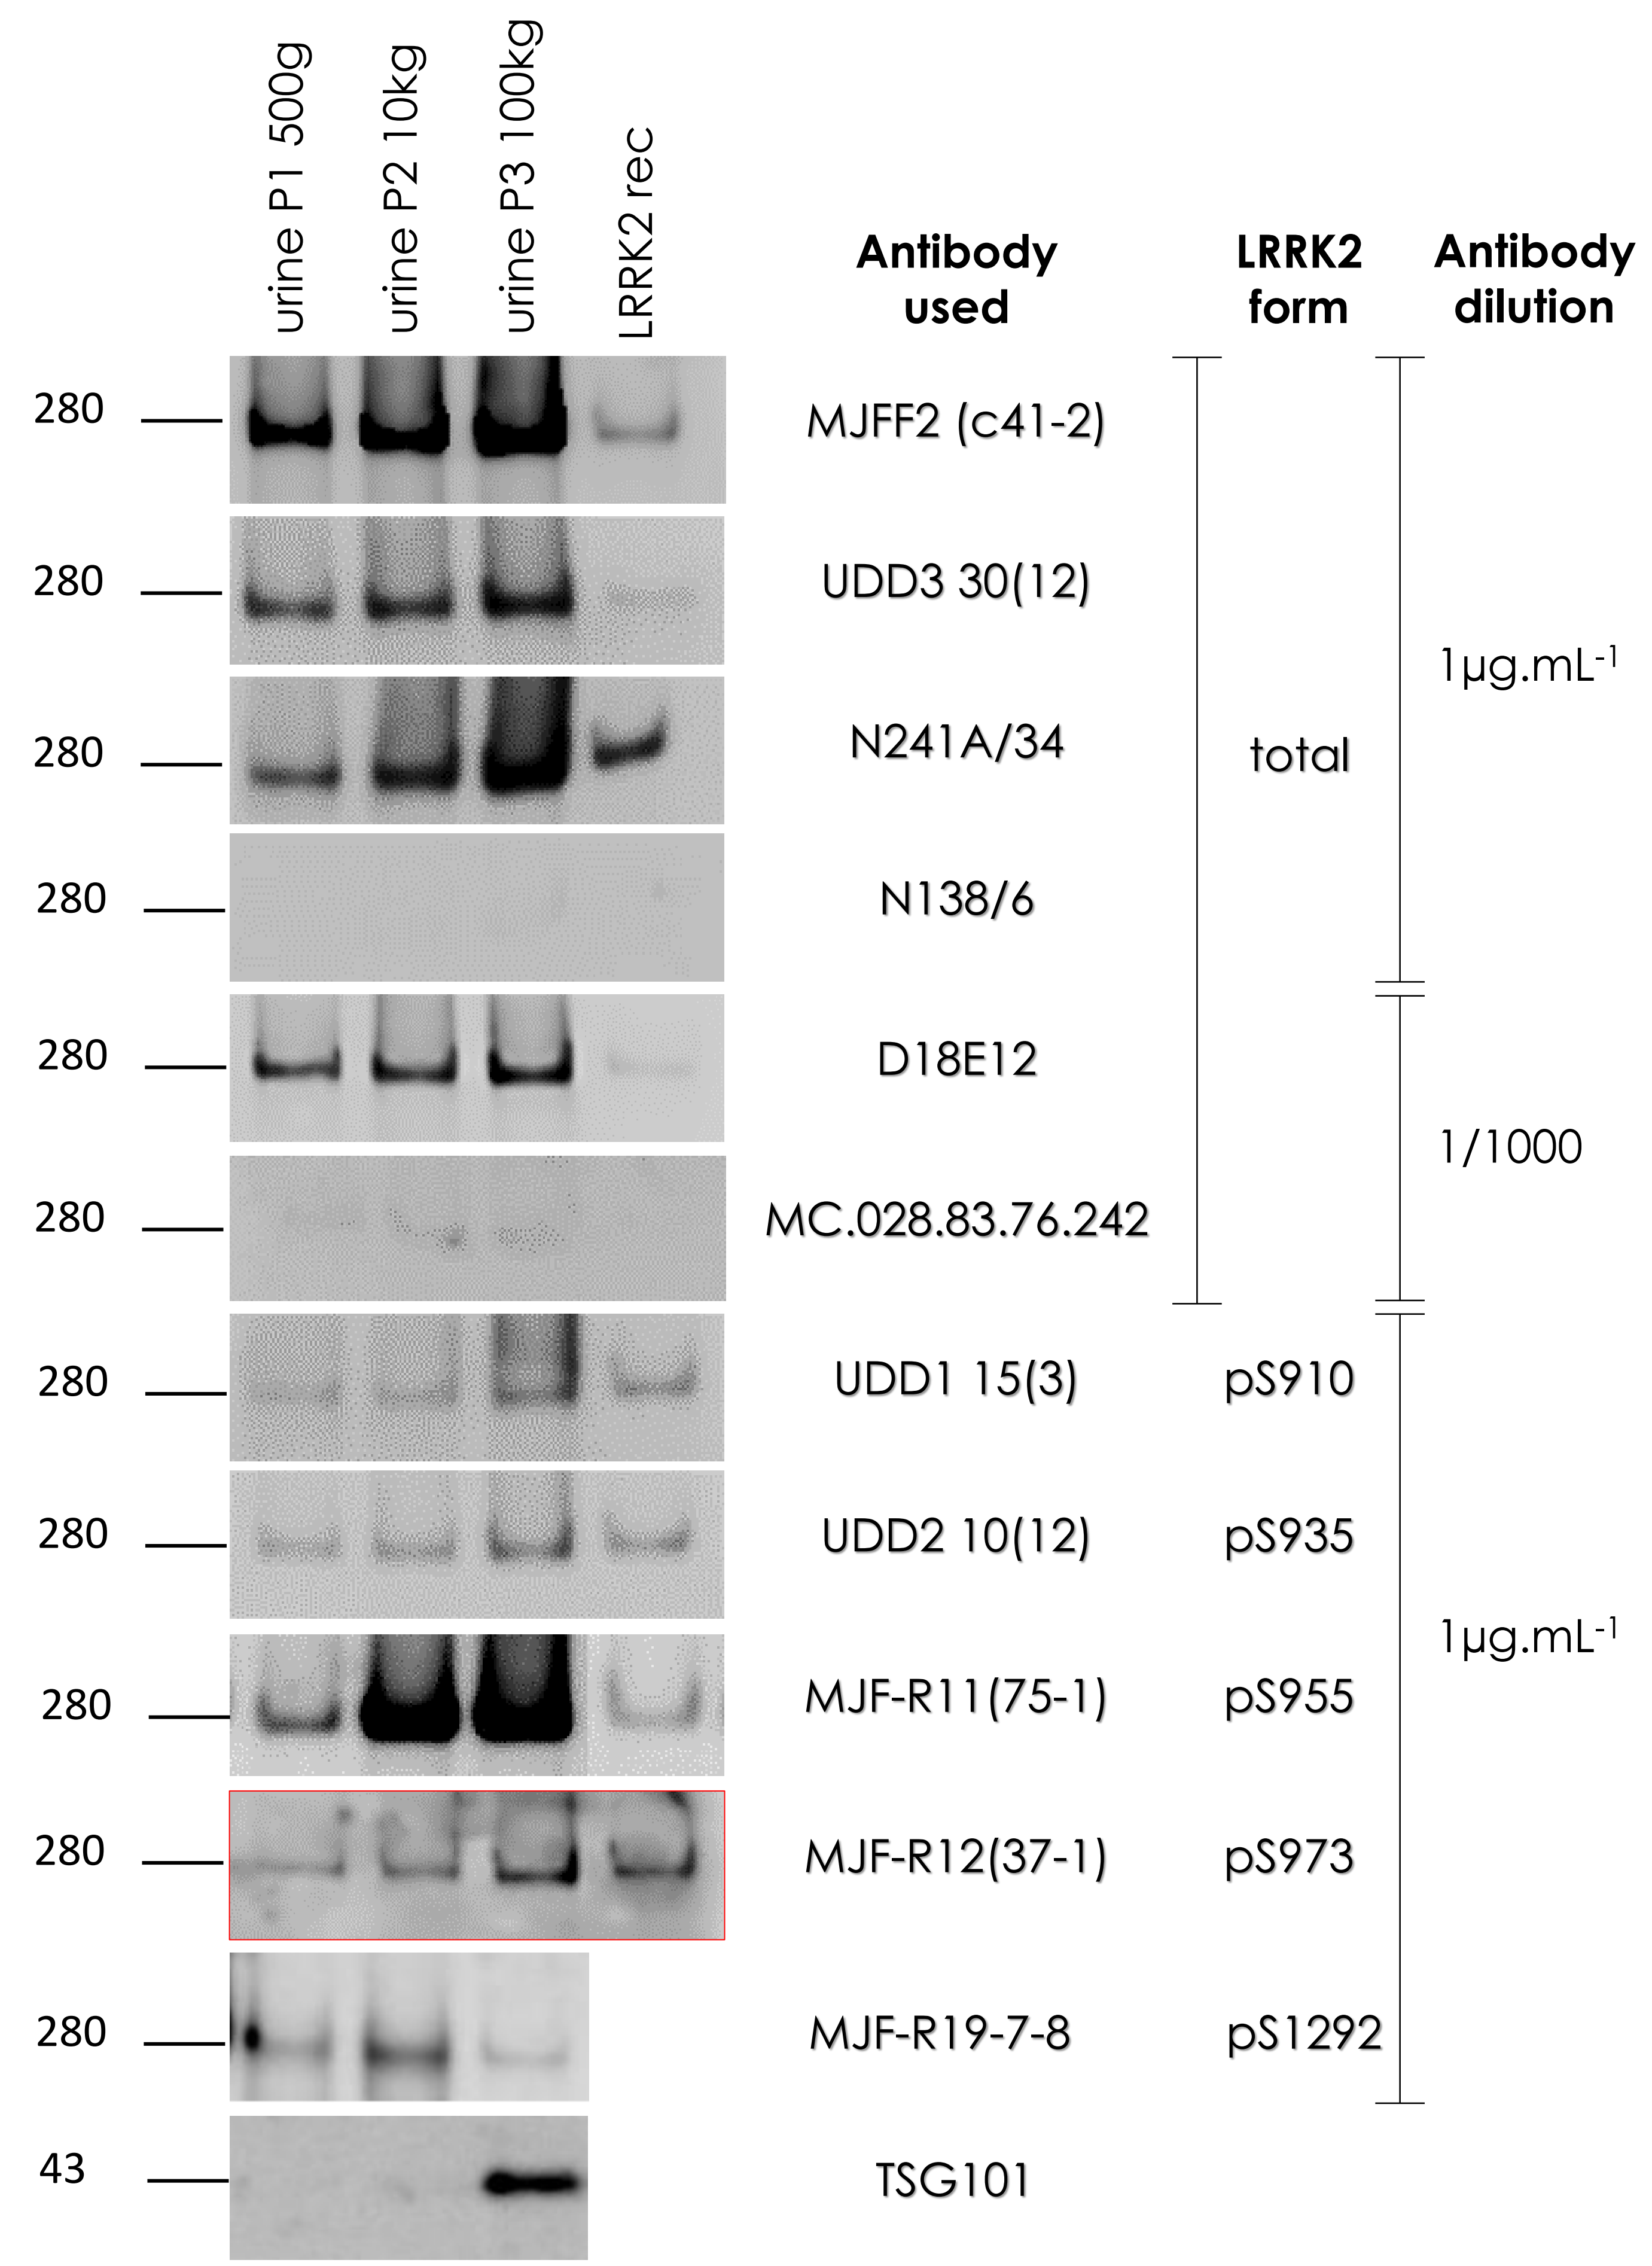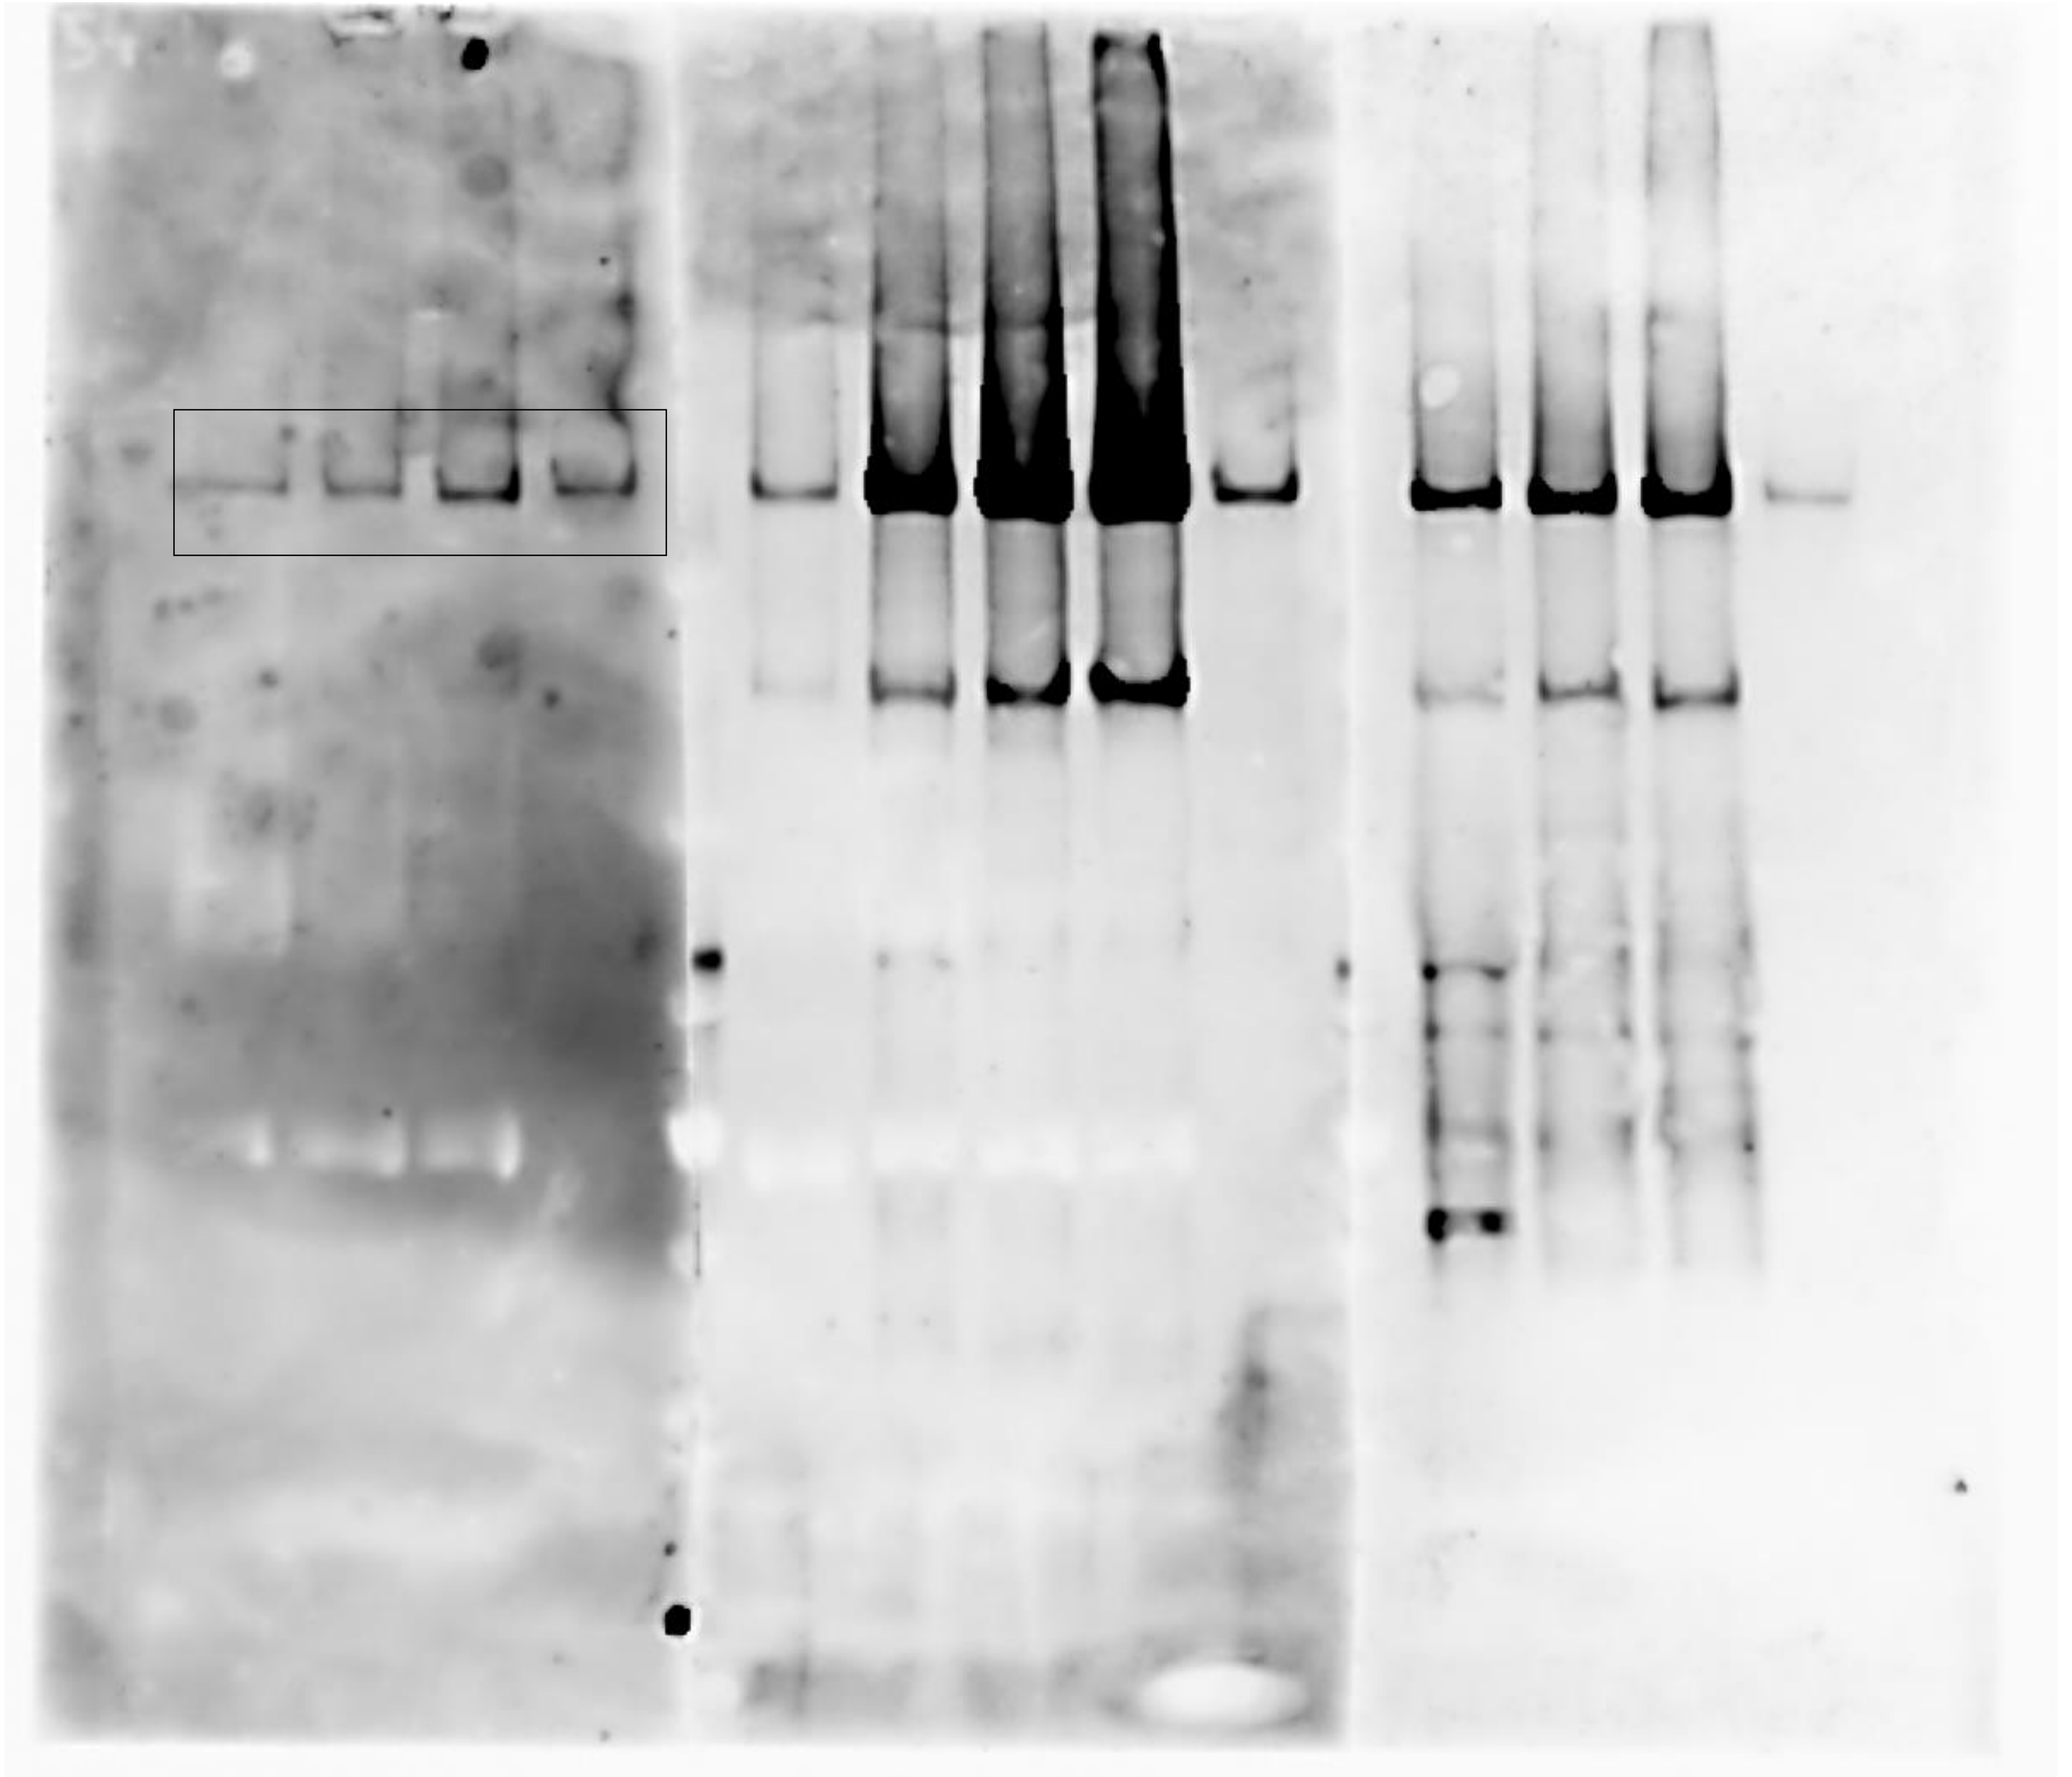

Figure 1d

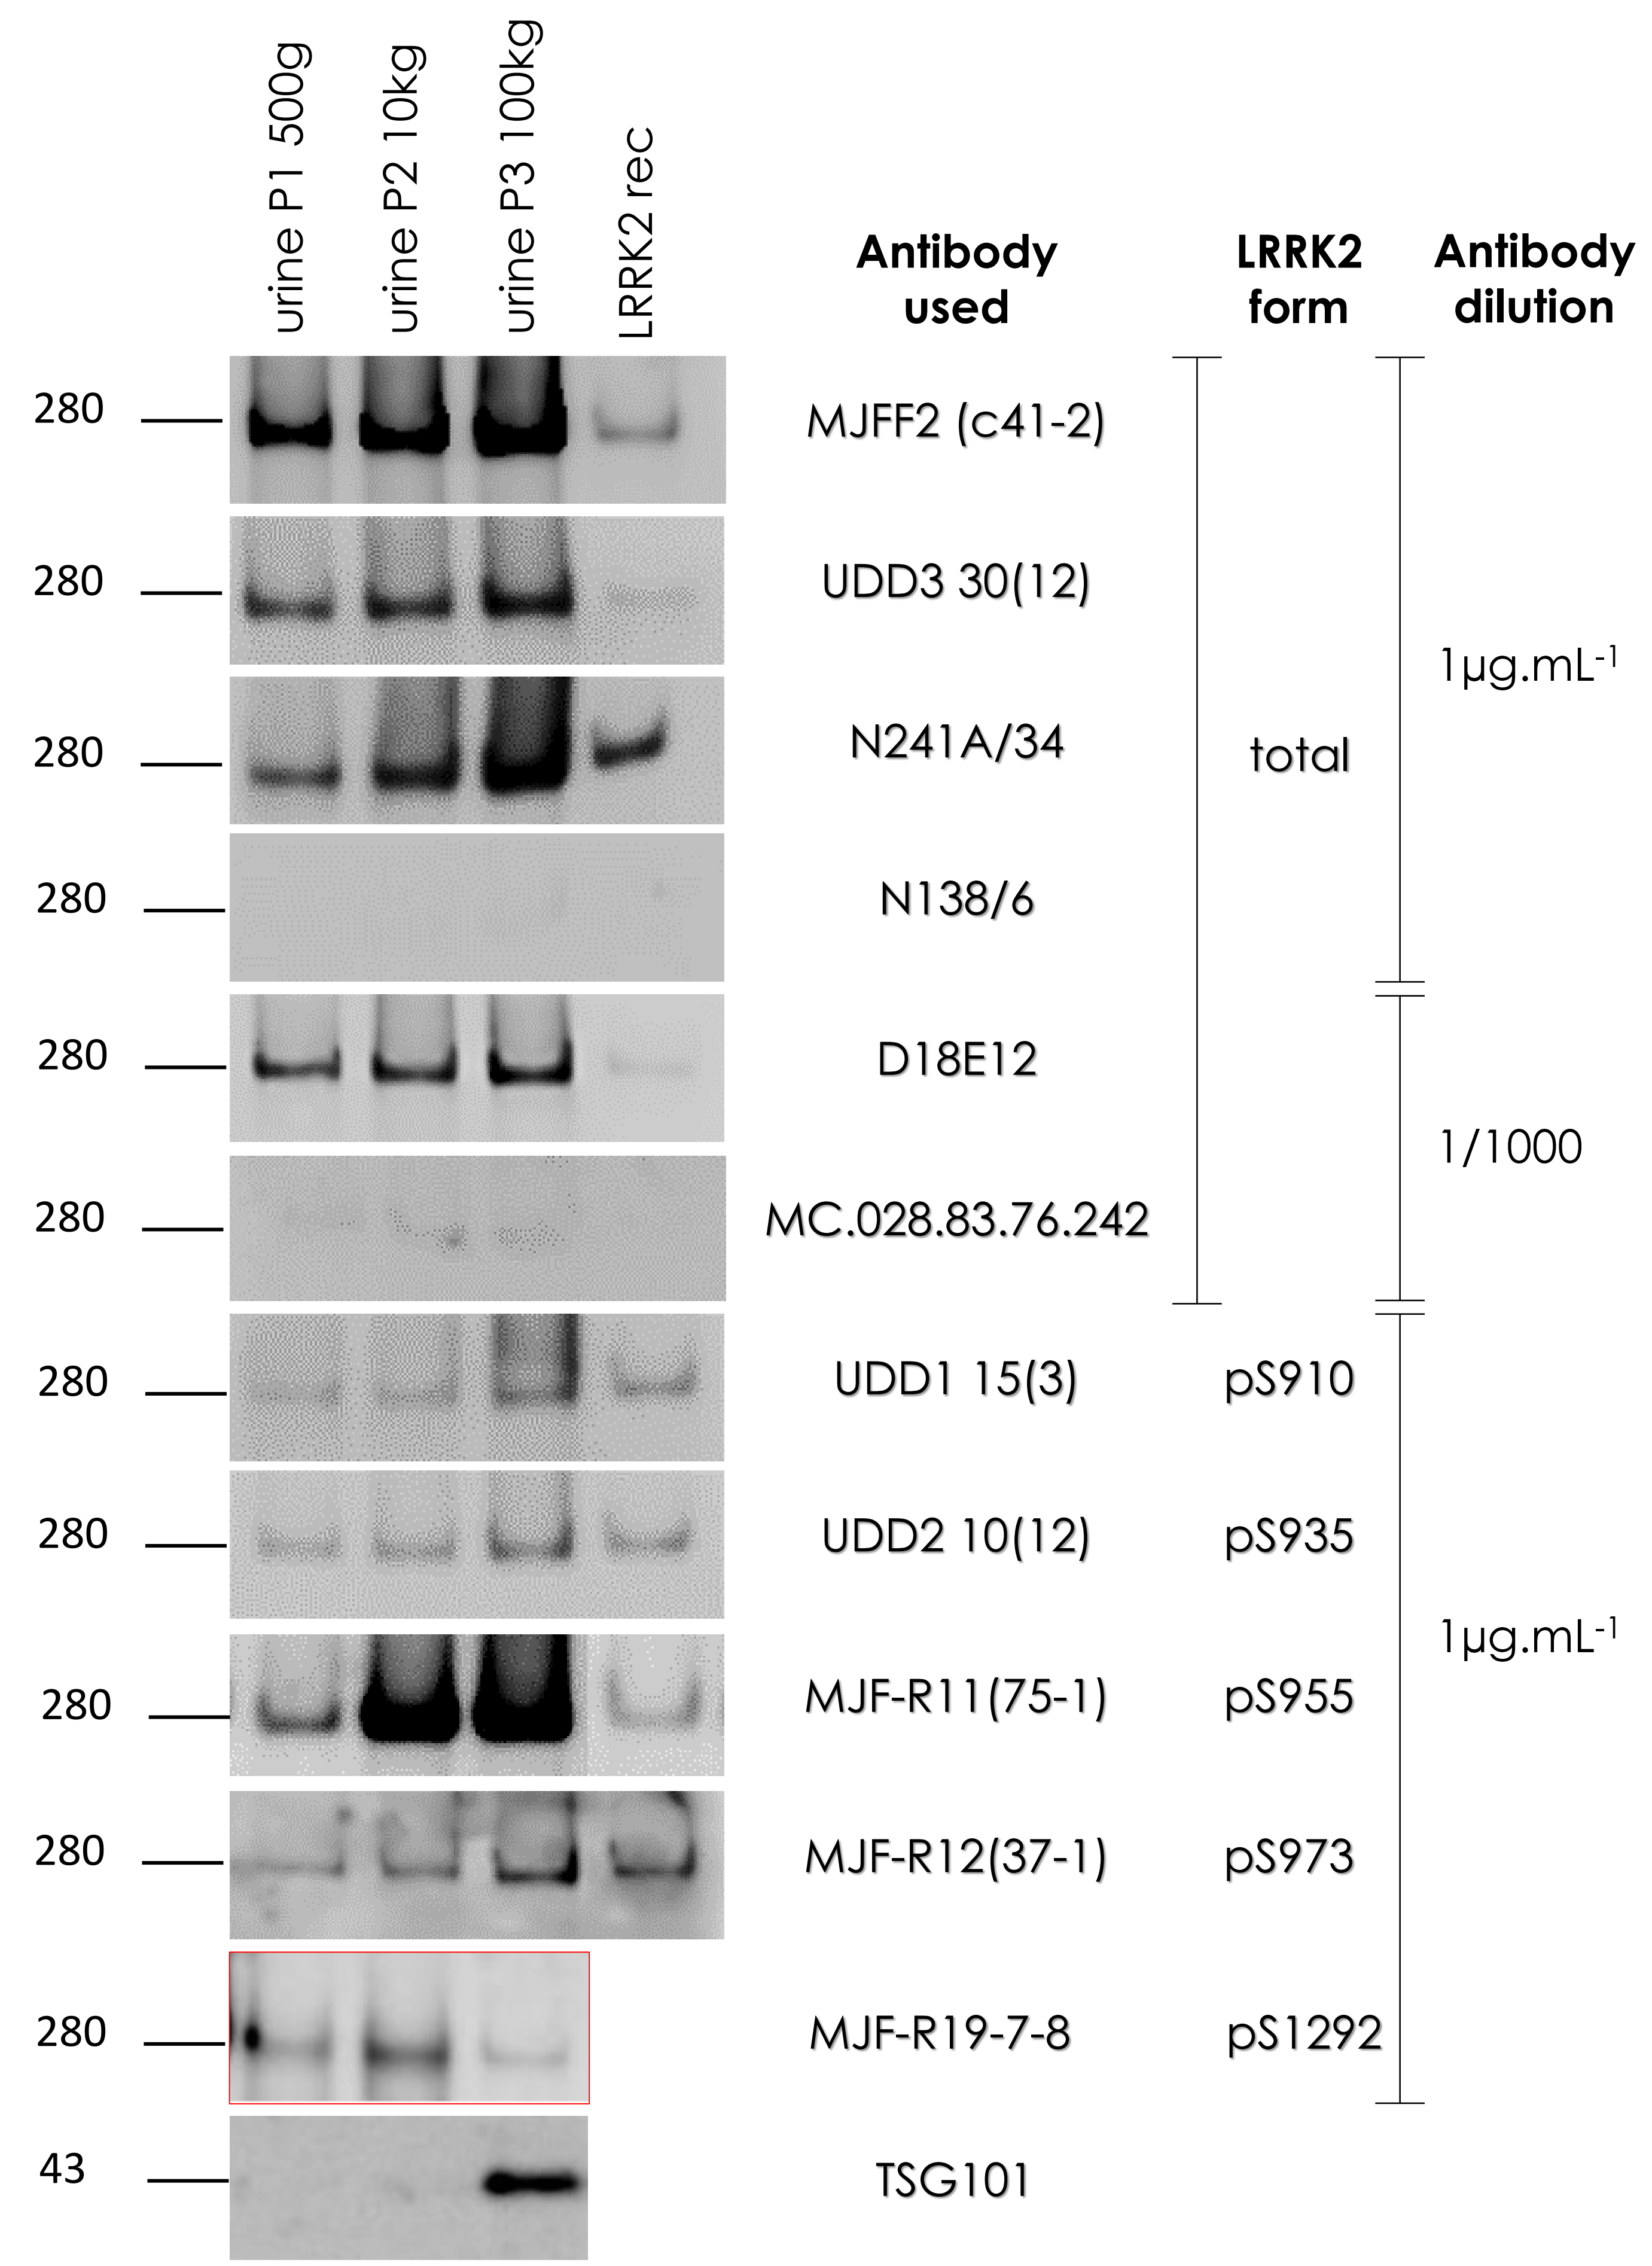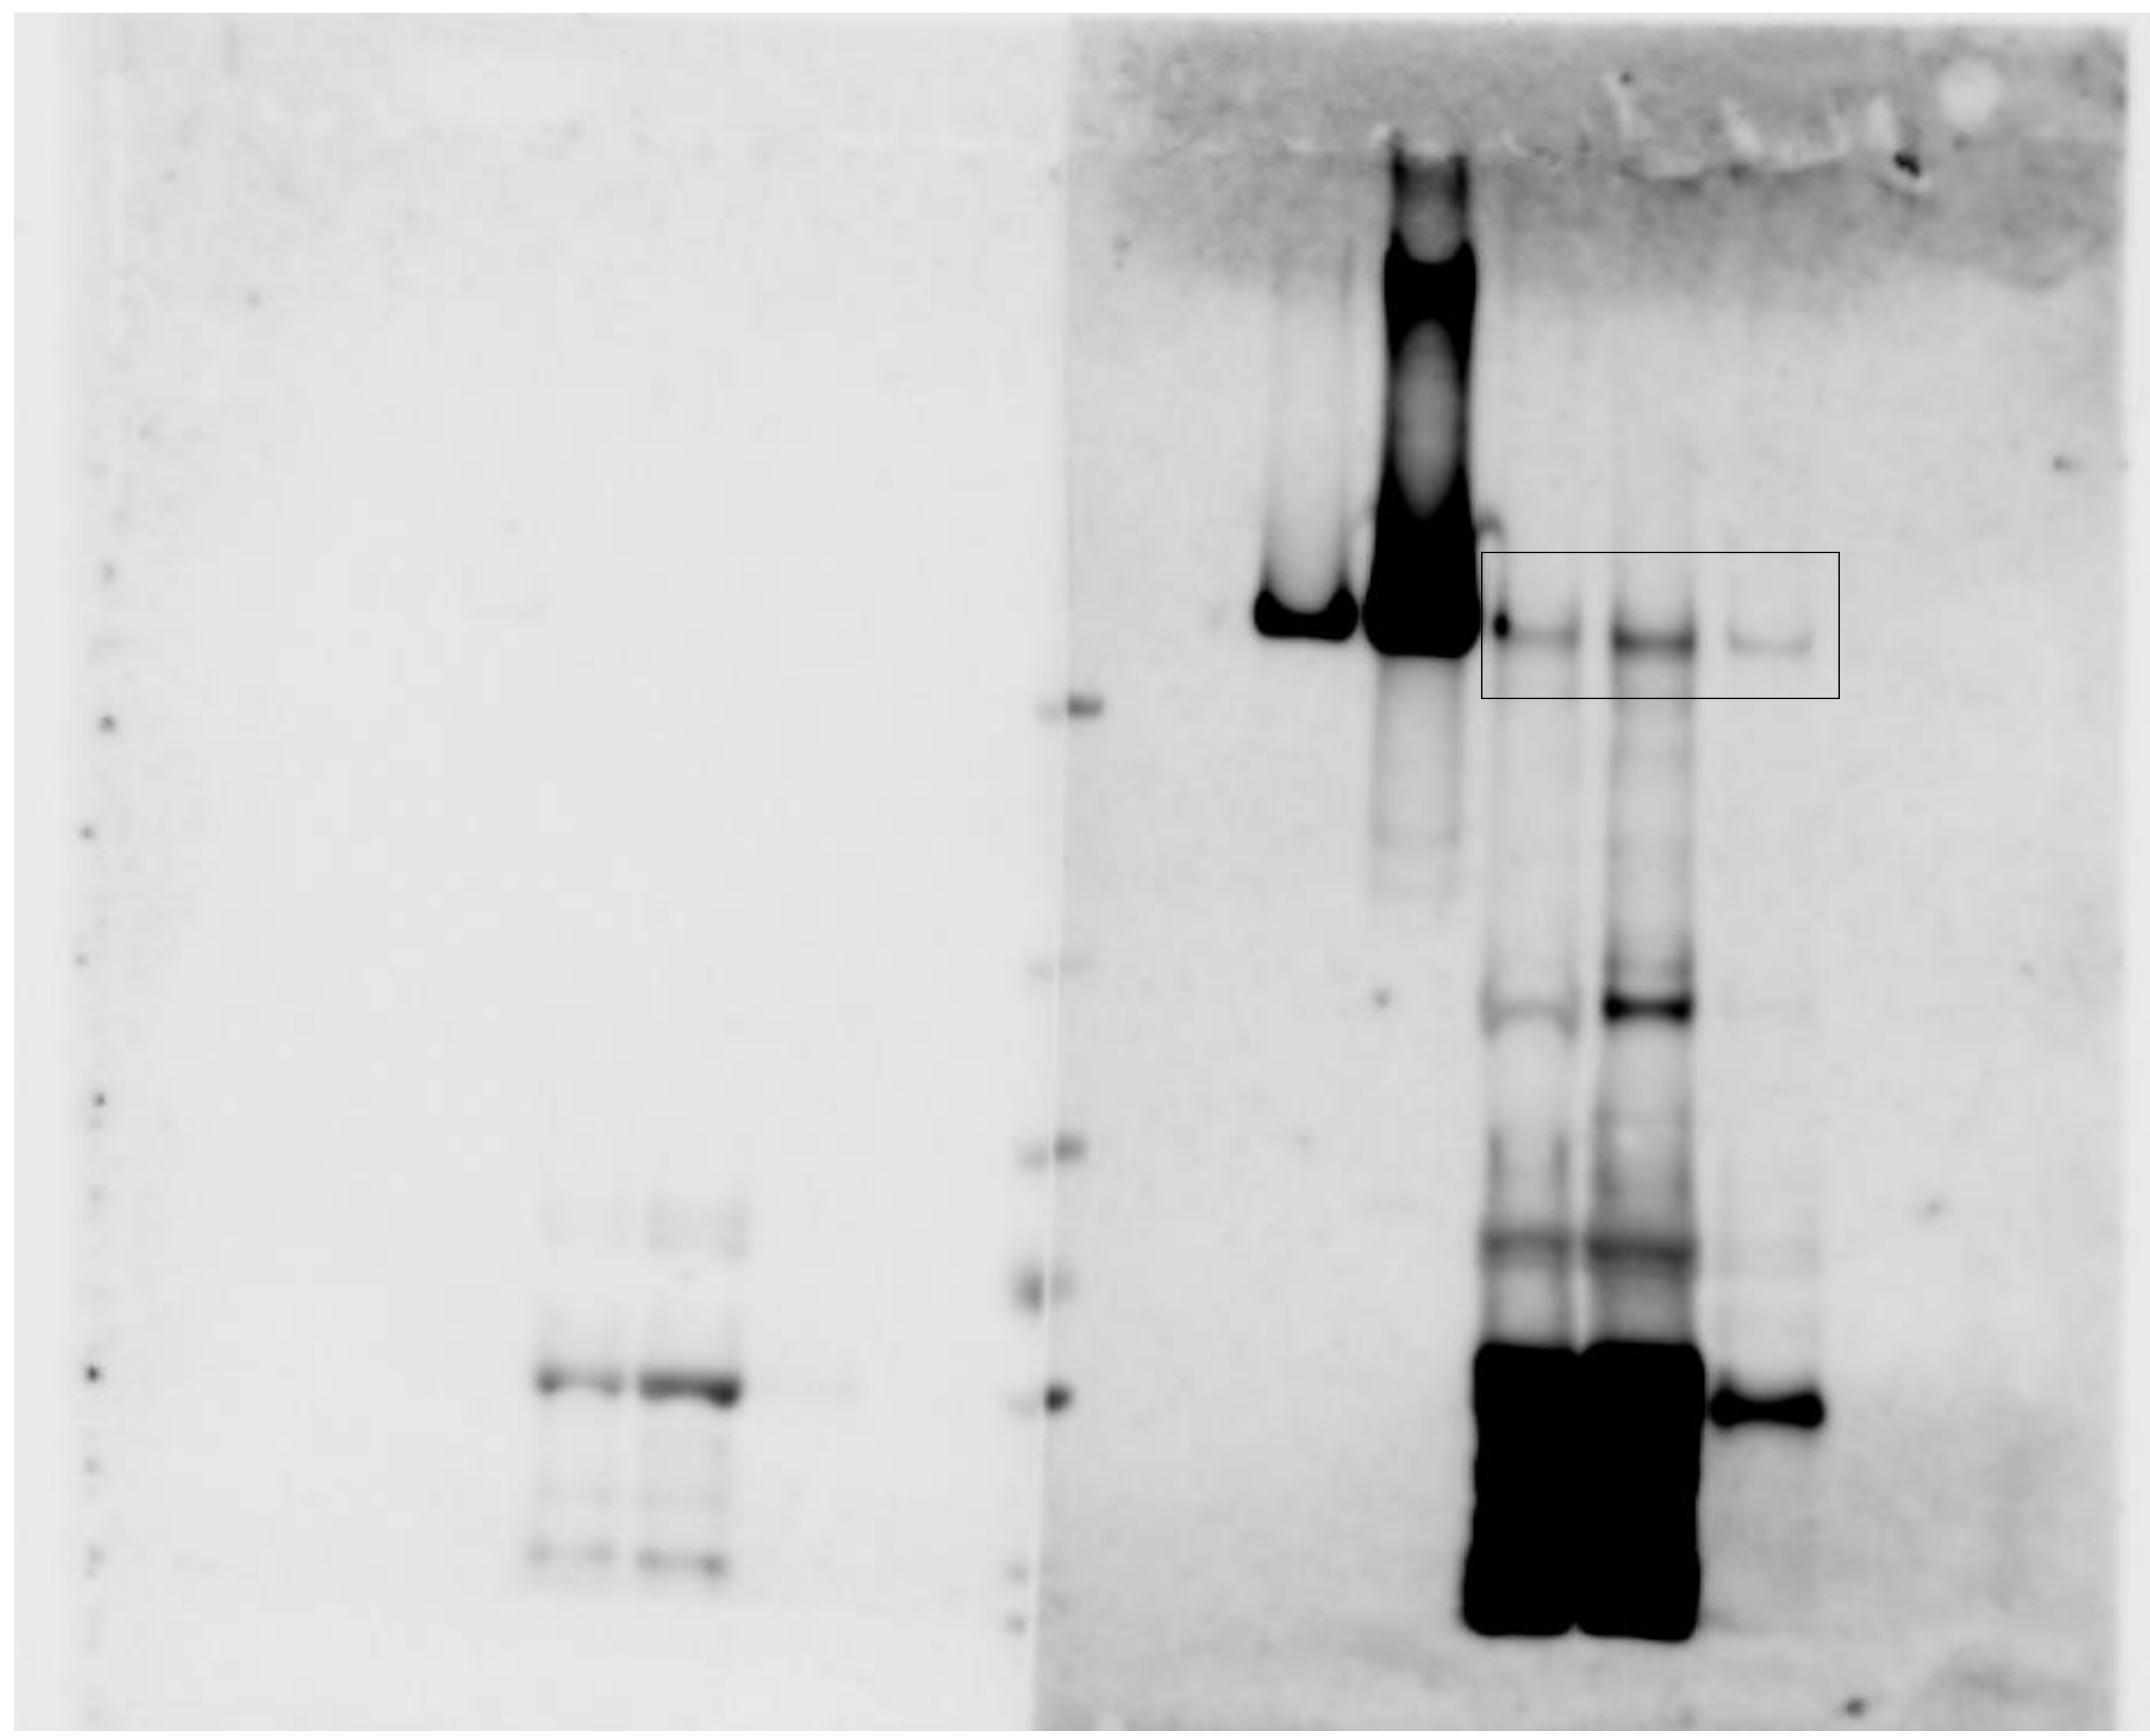

Figure 1d

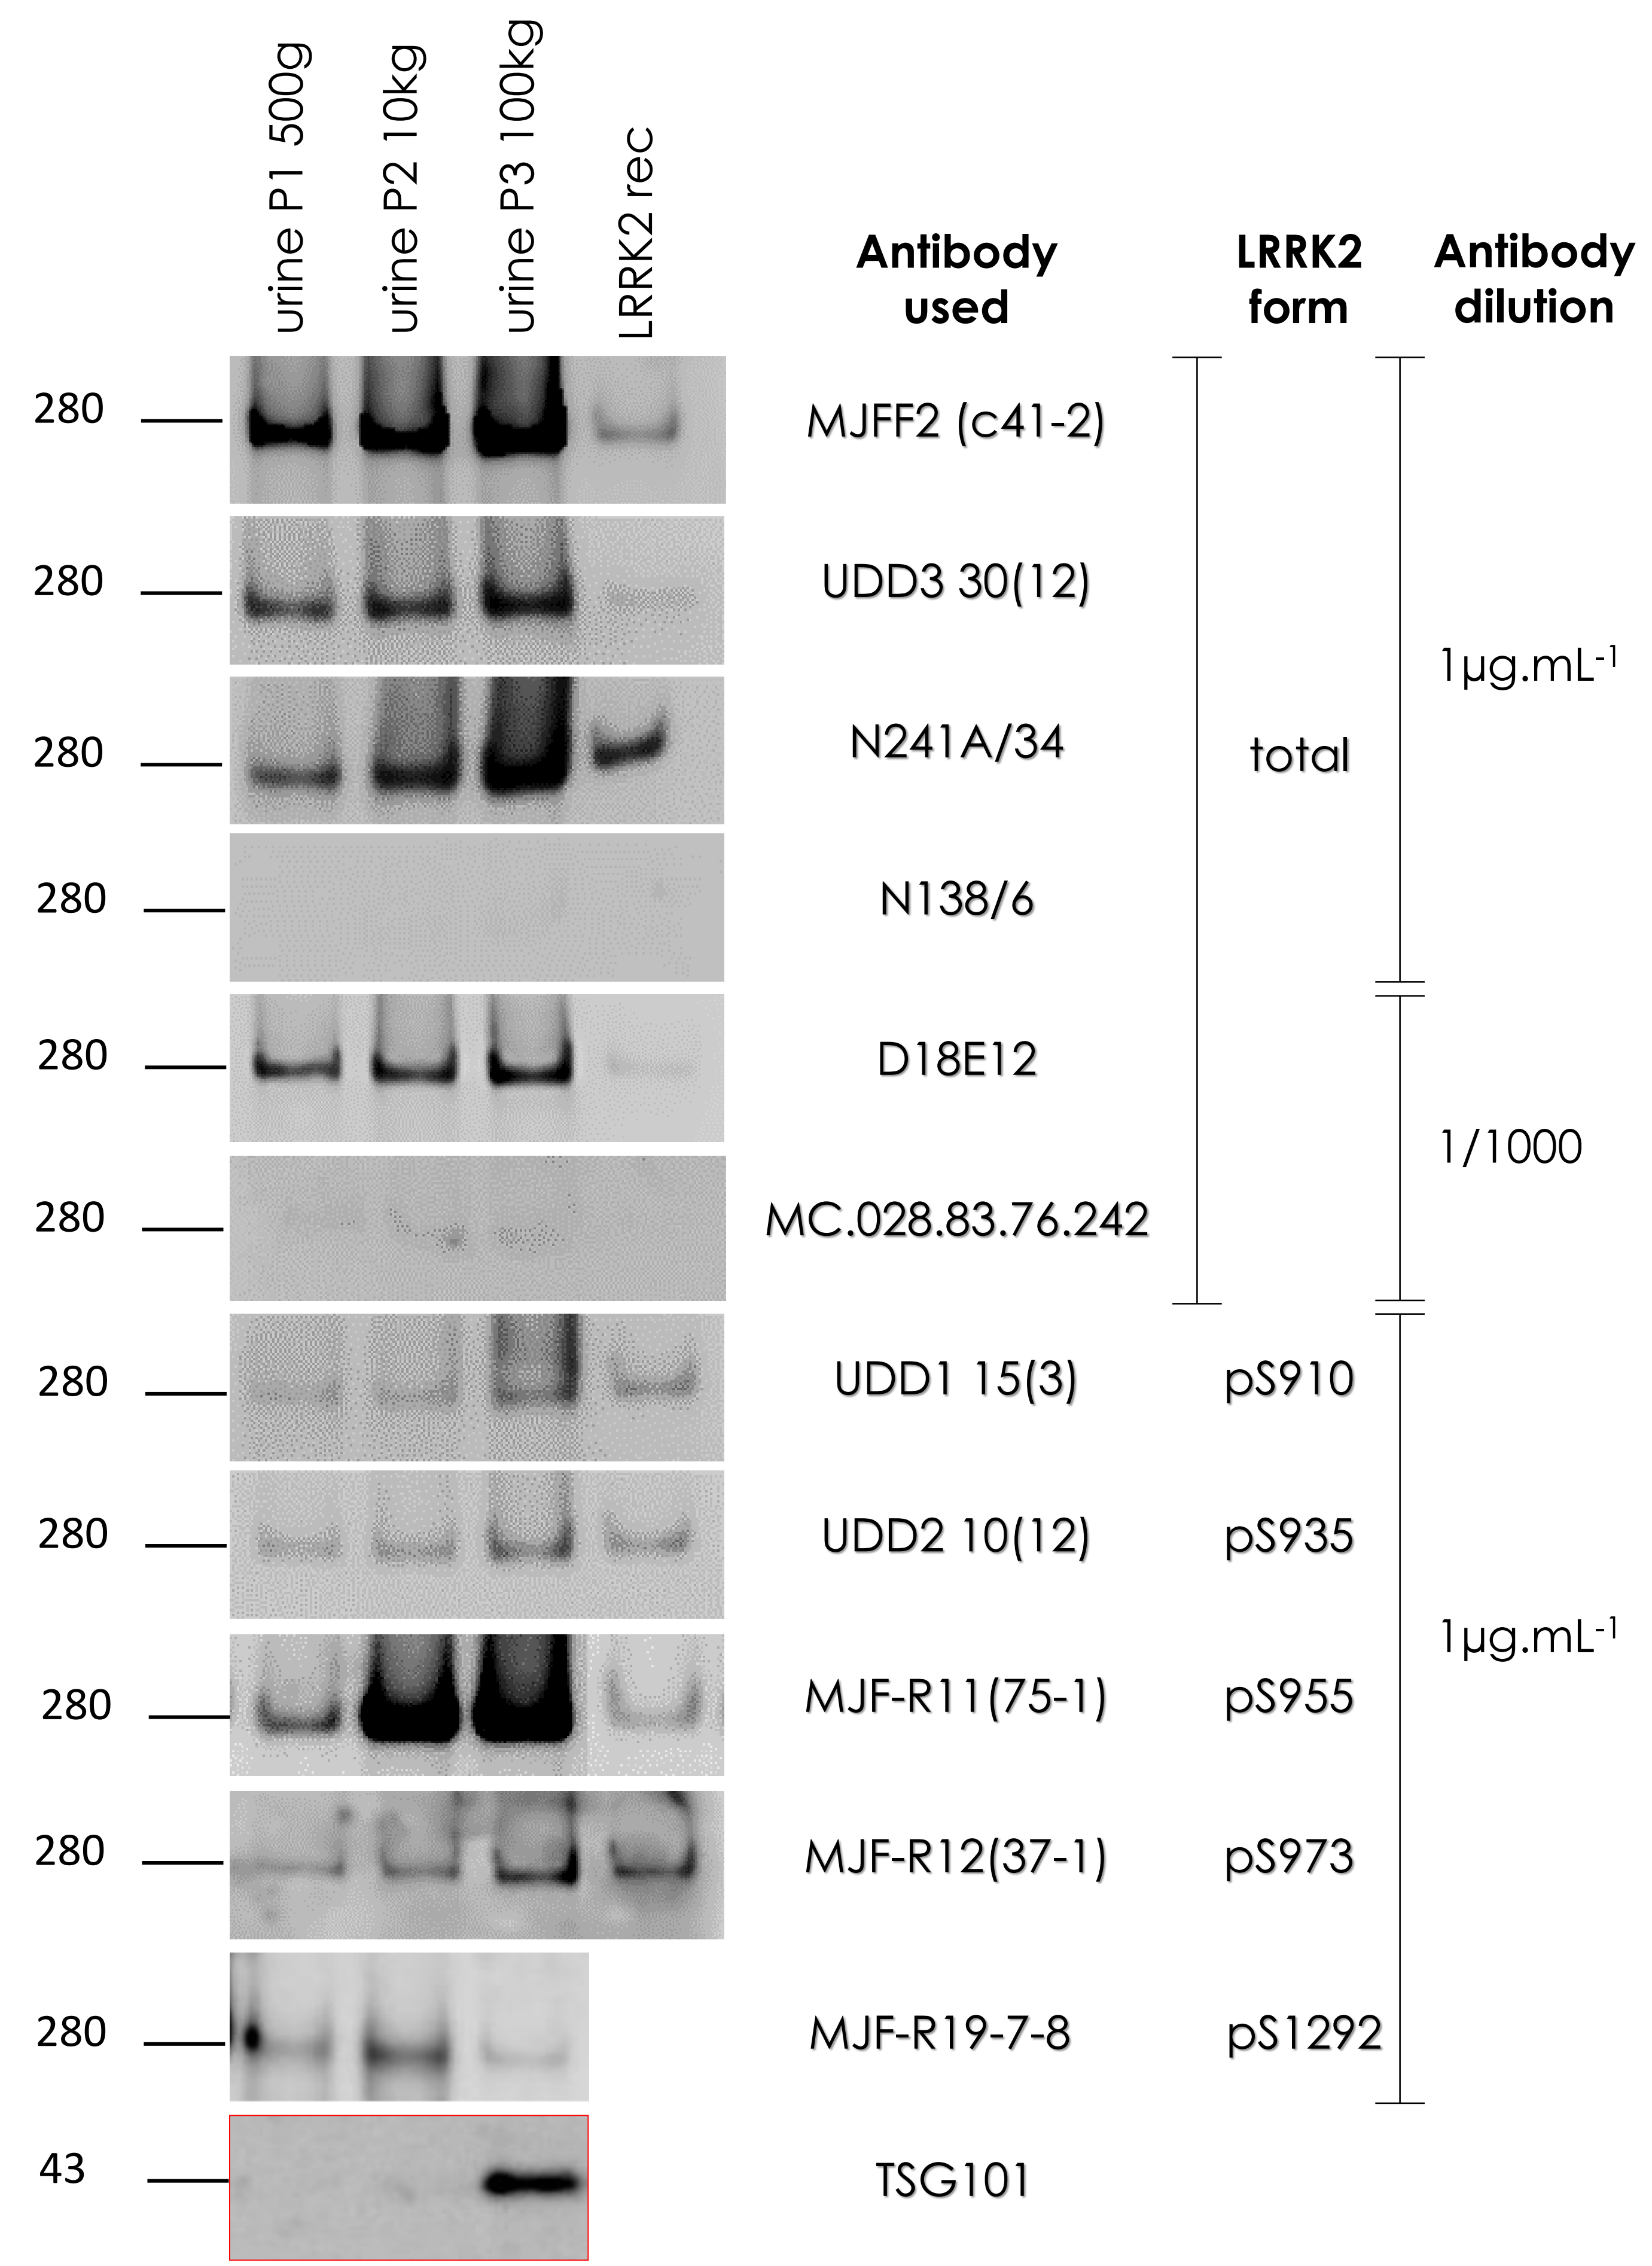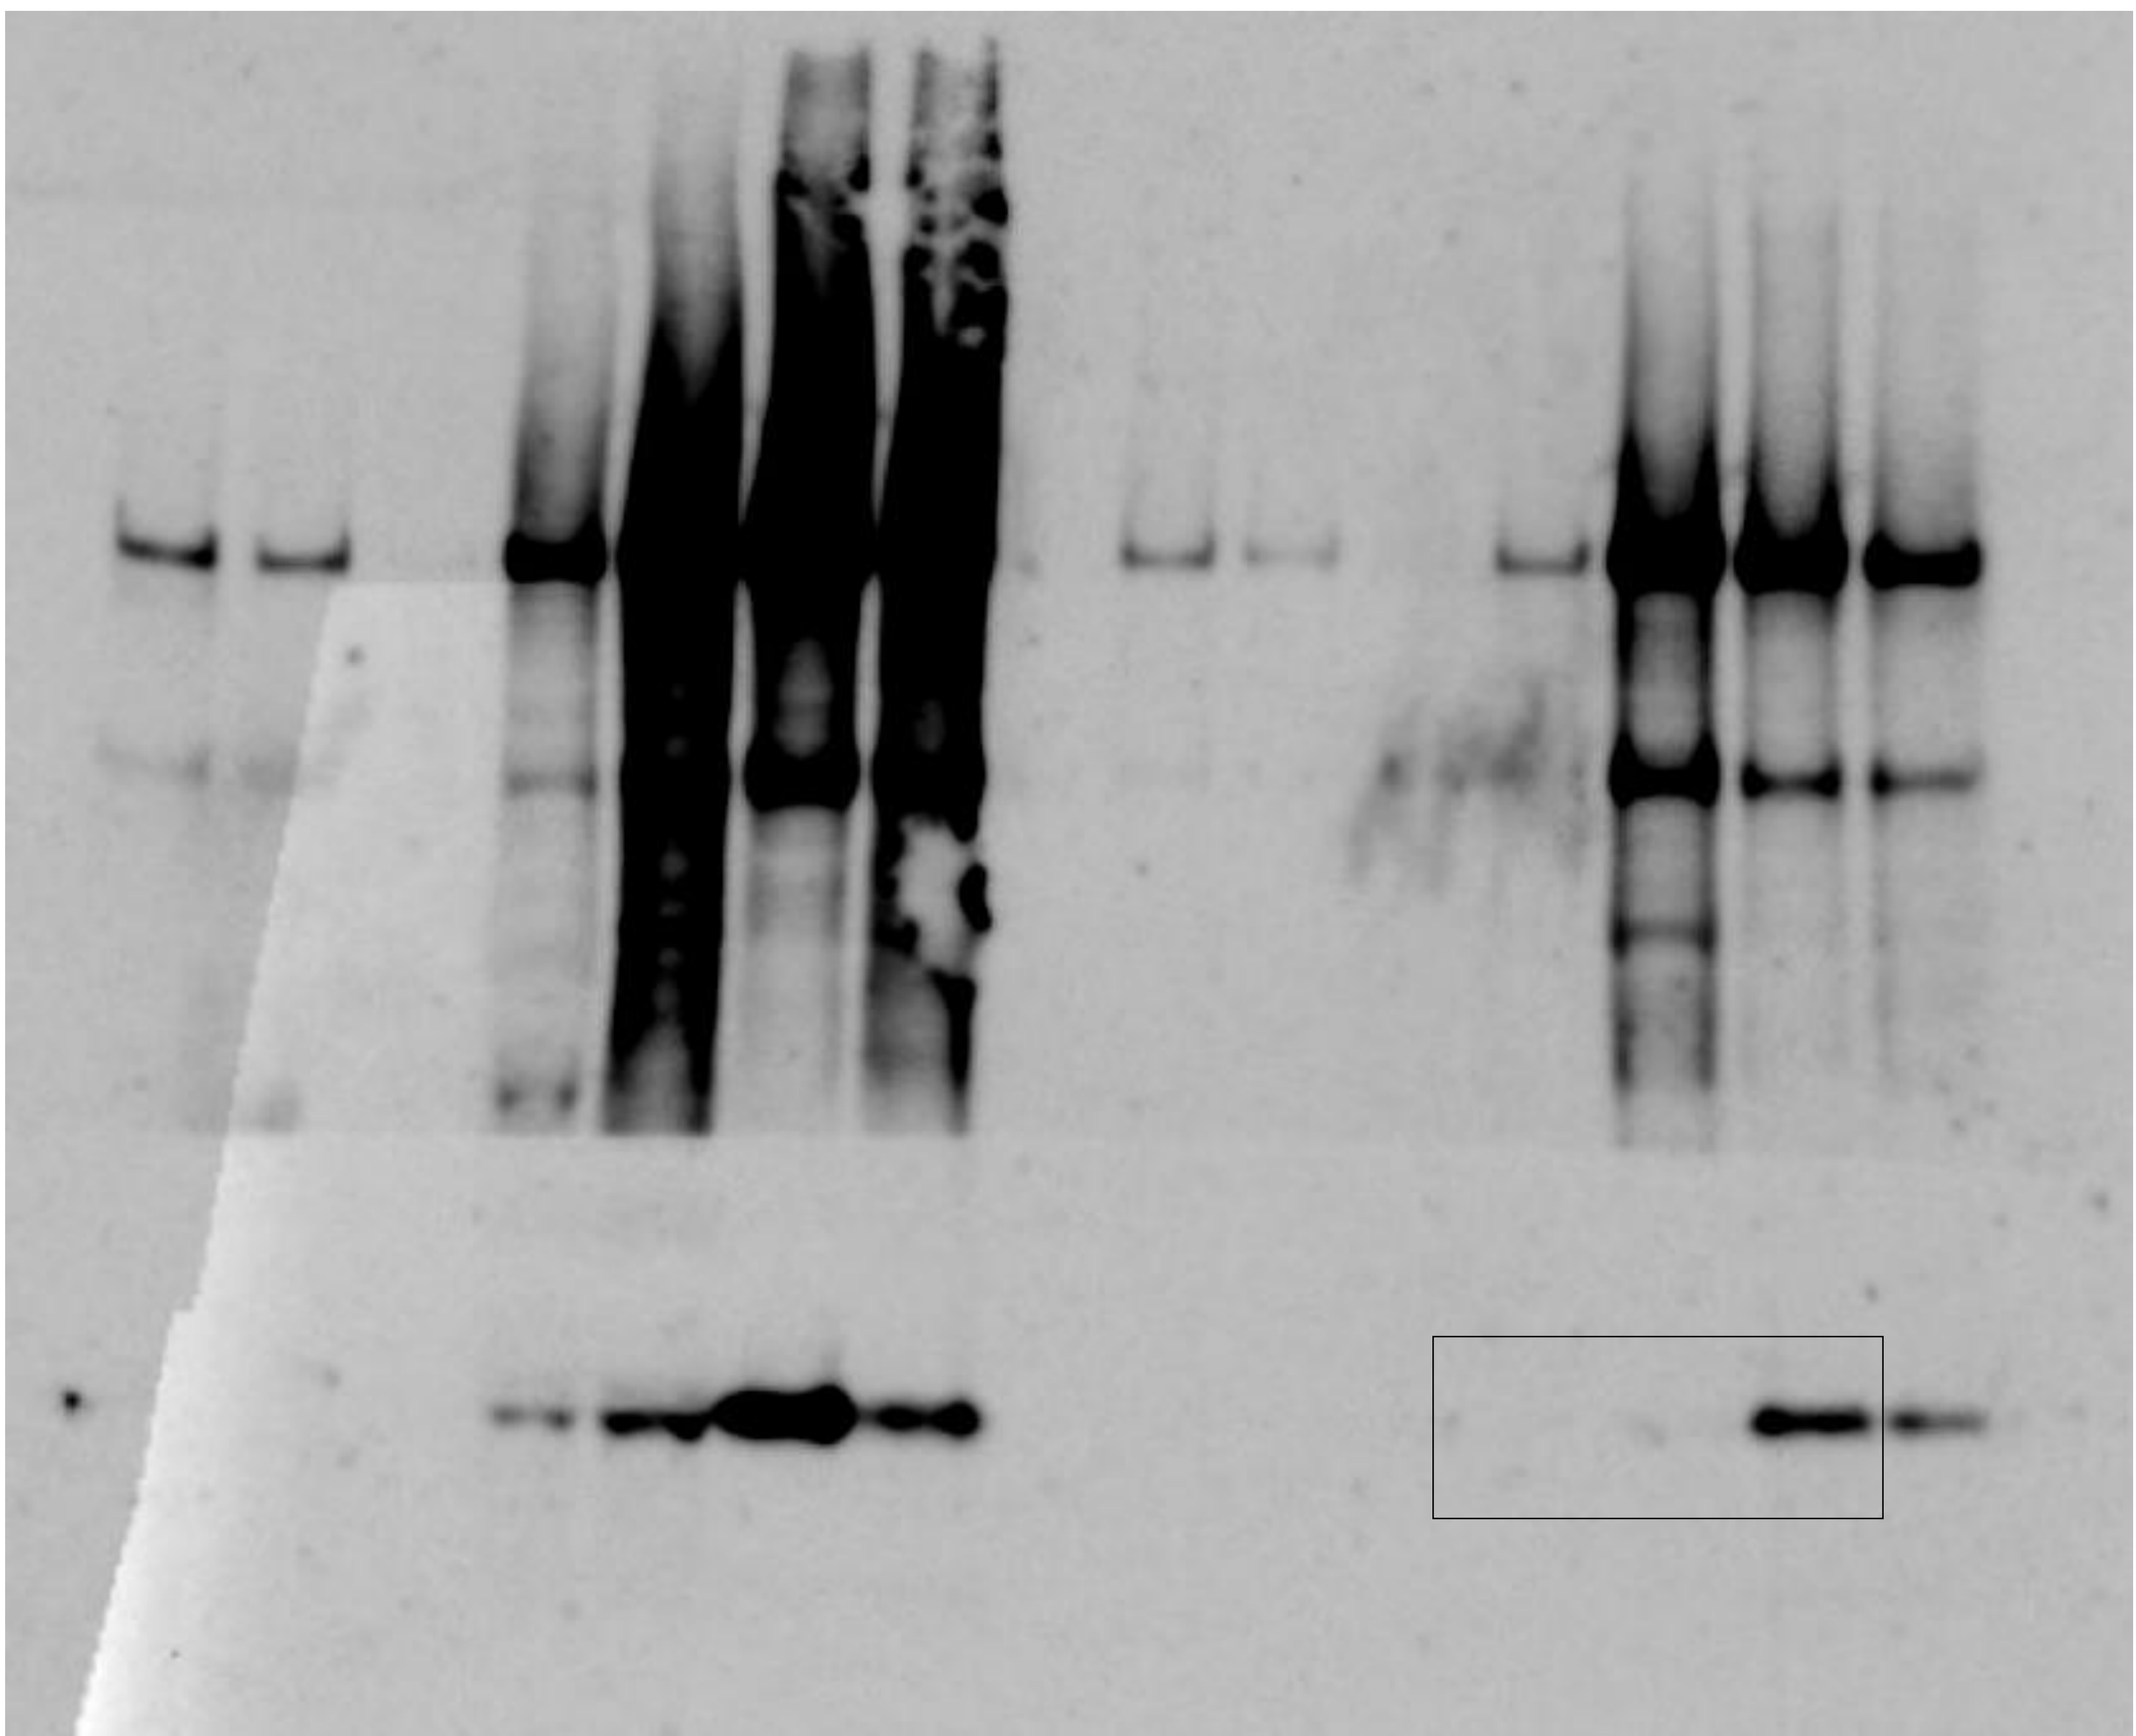

Figure 5a

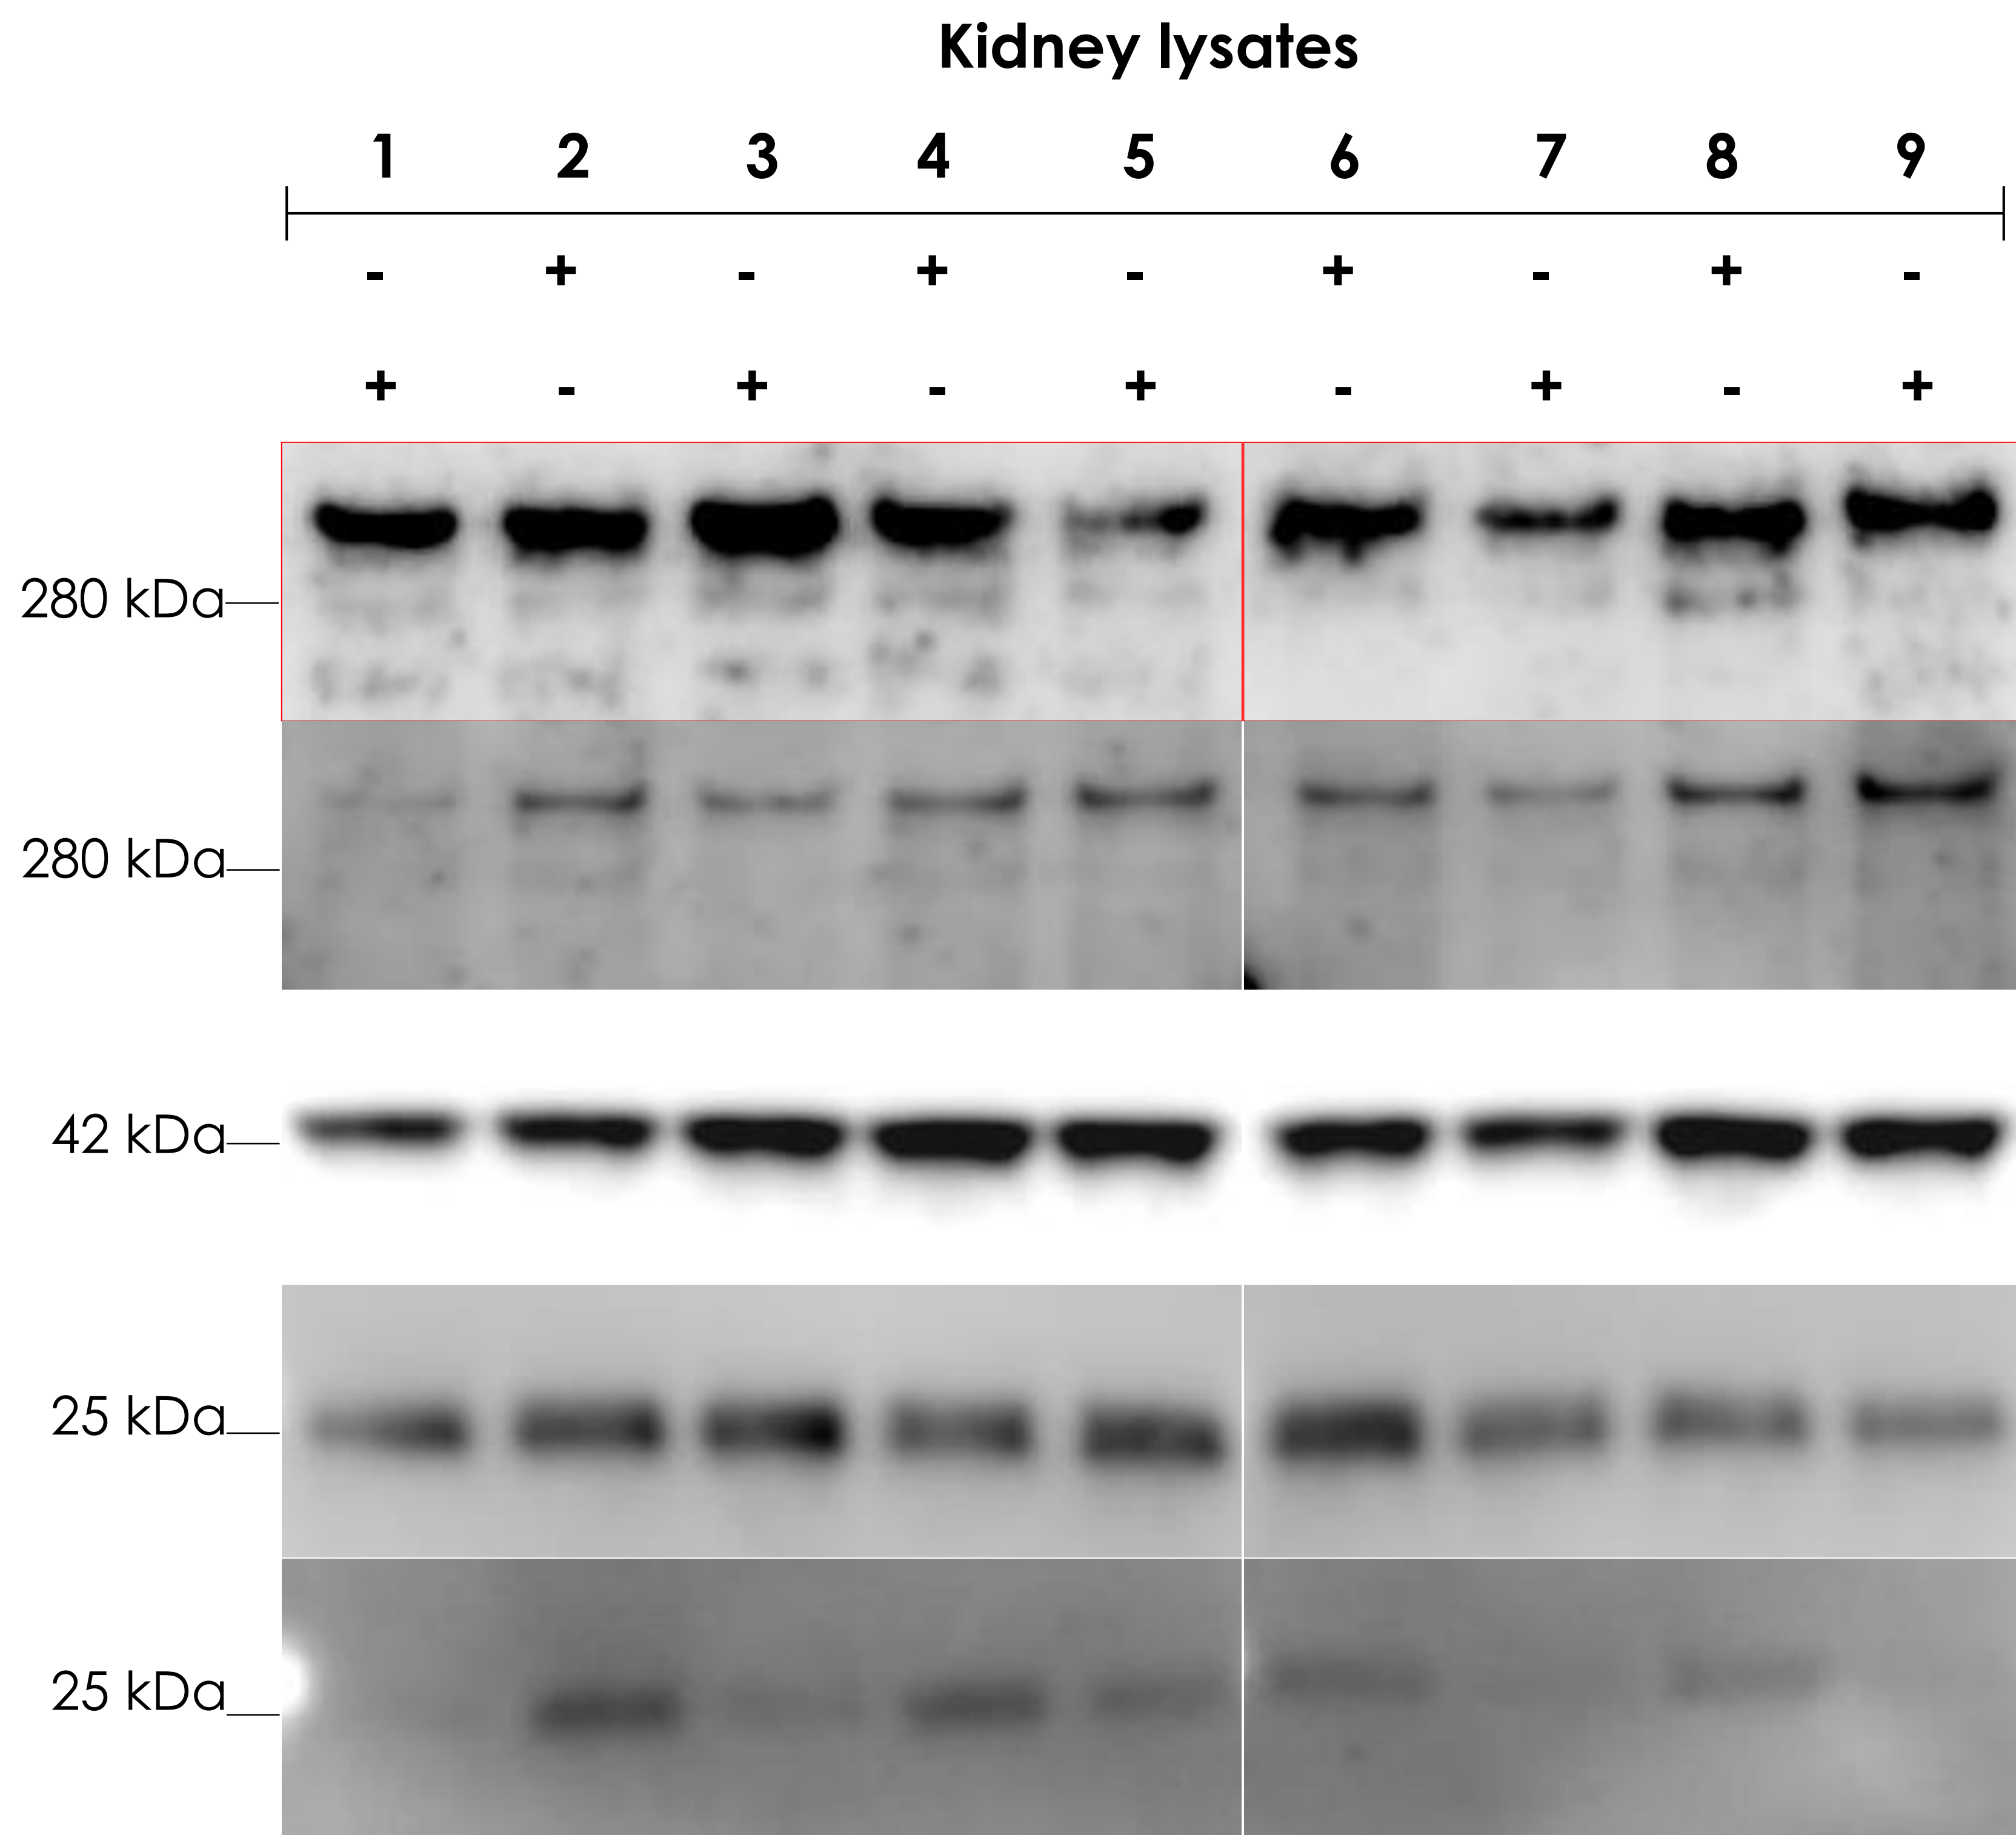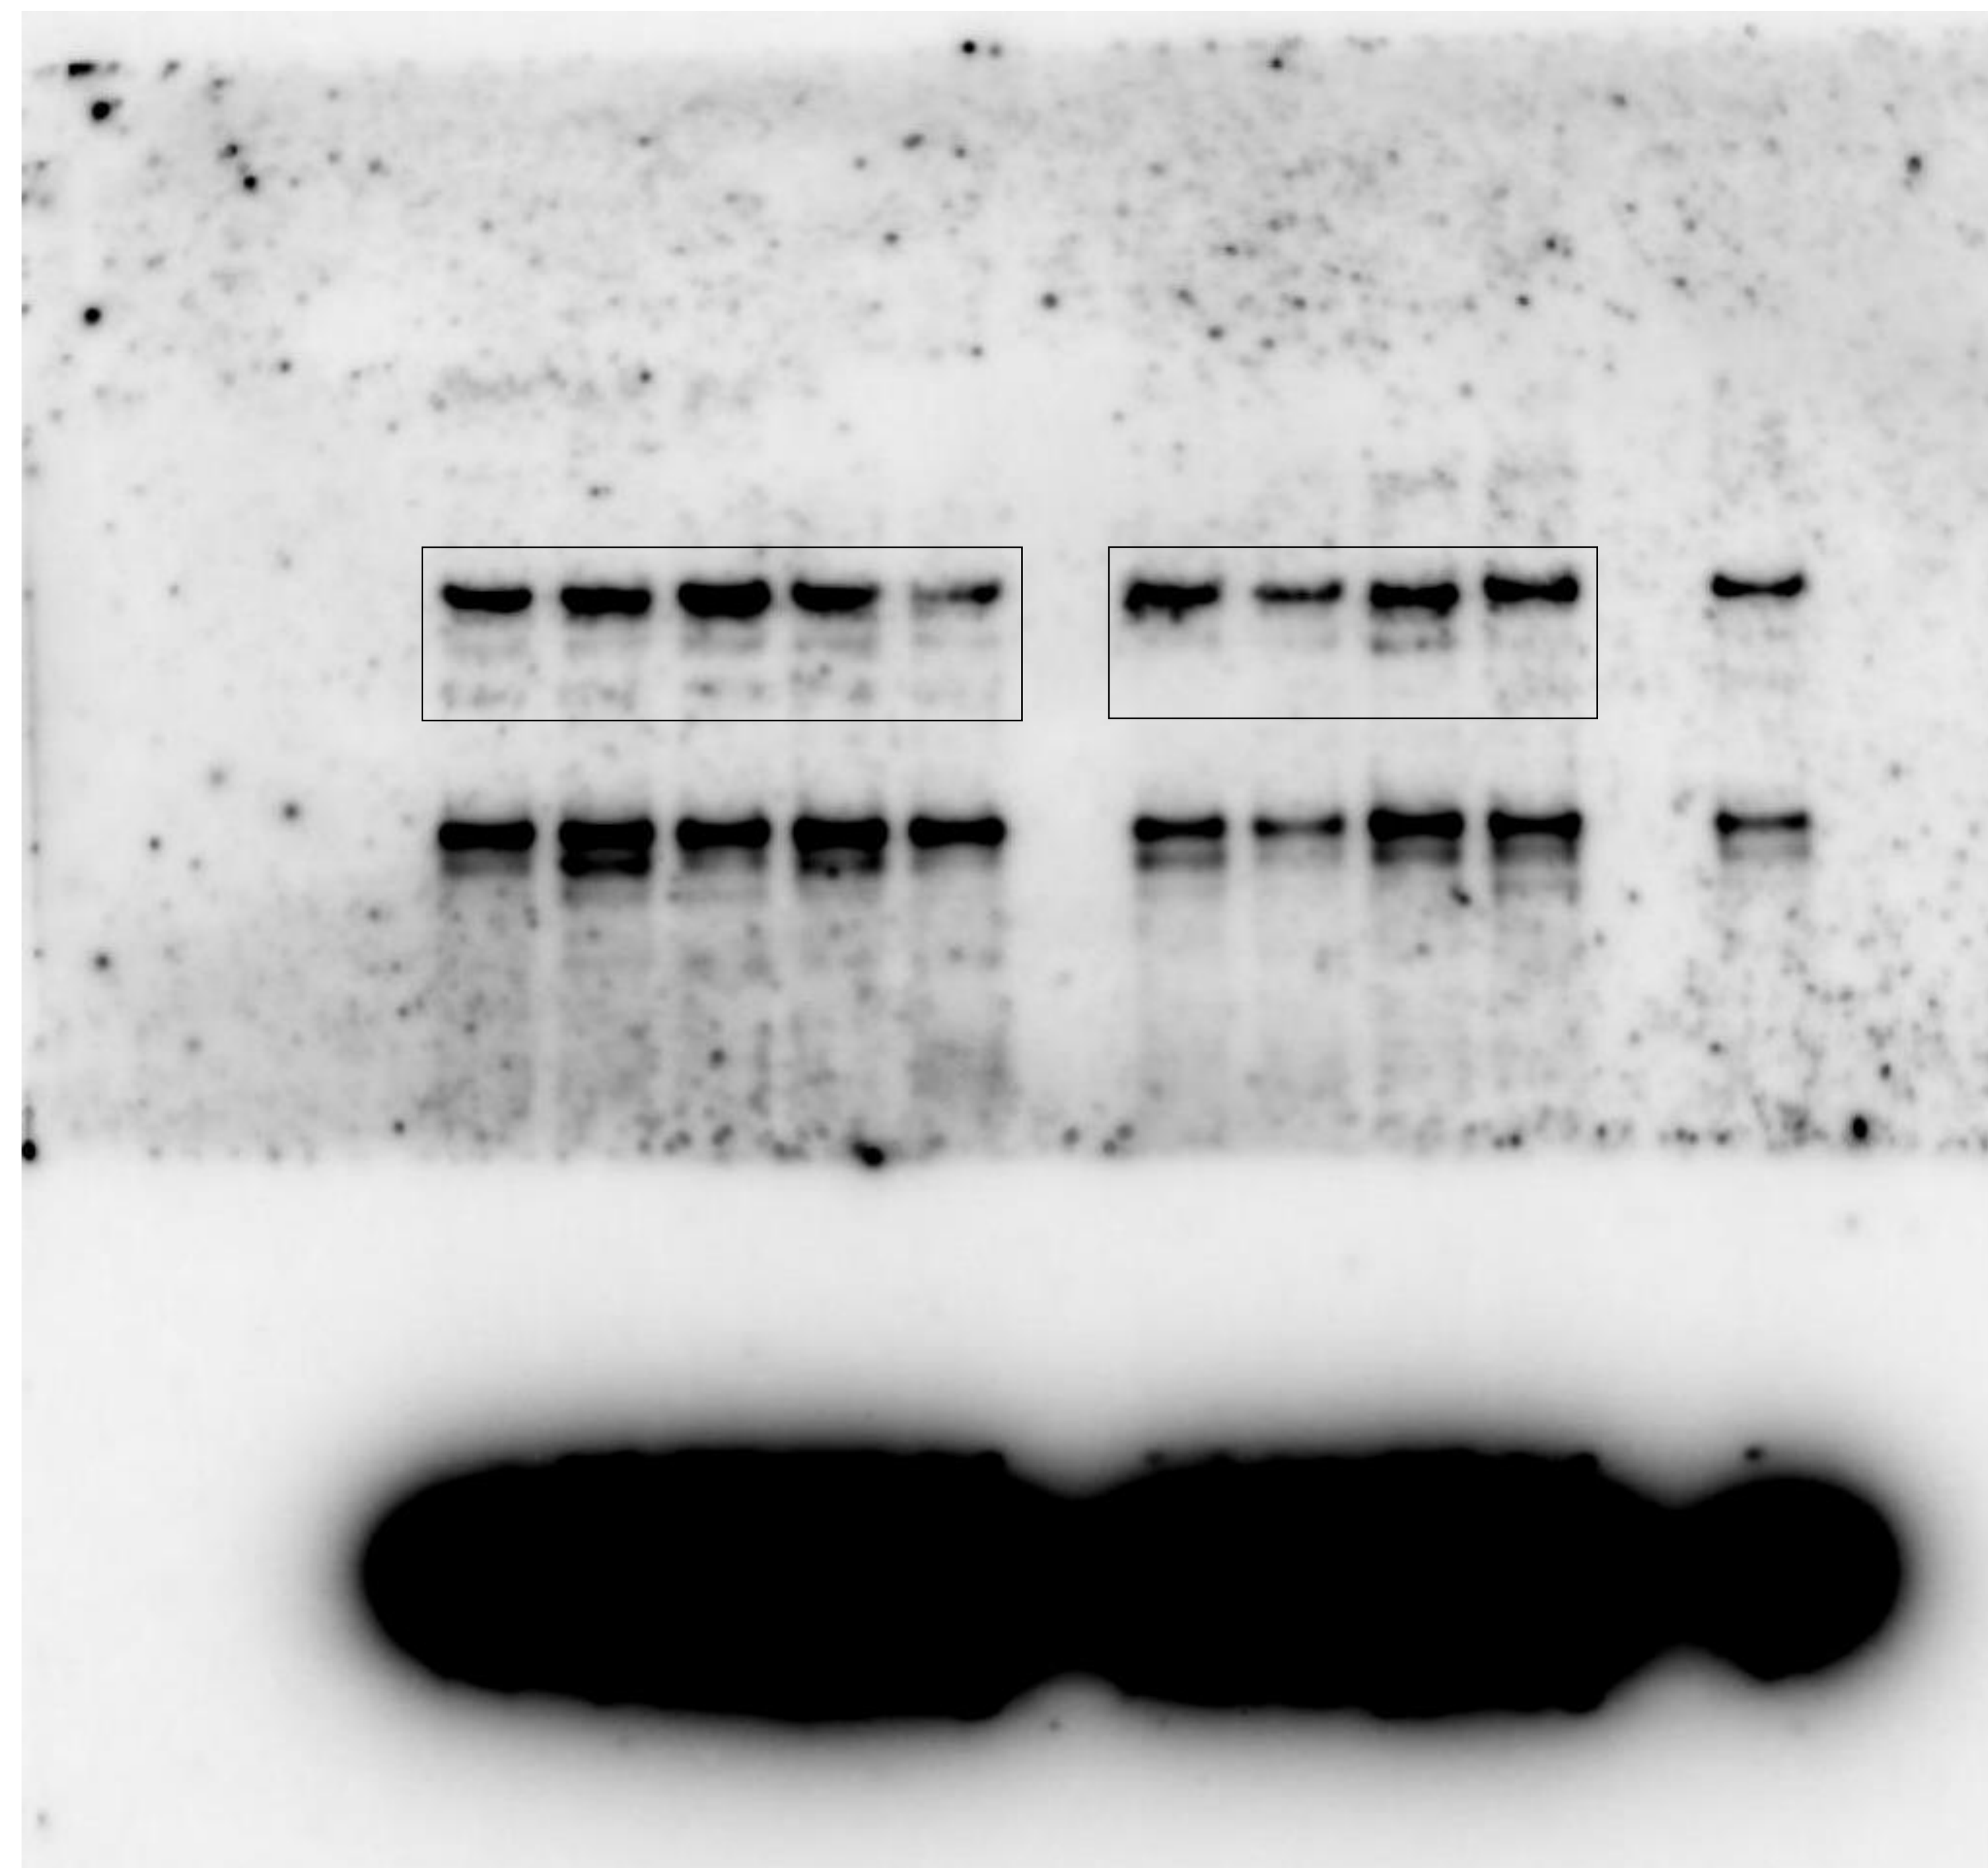

Figure 5a

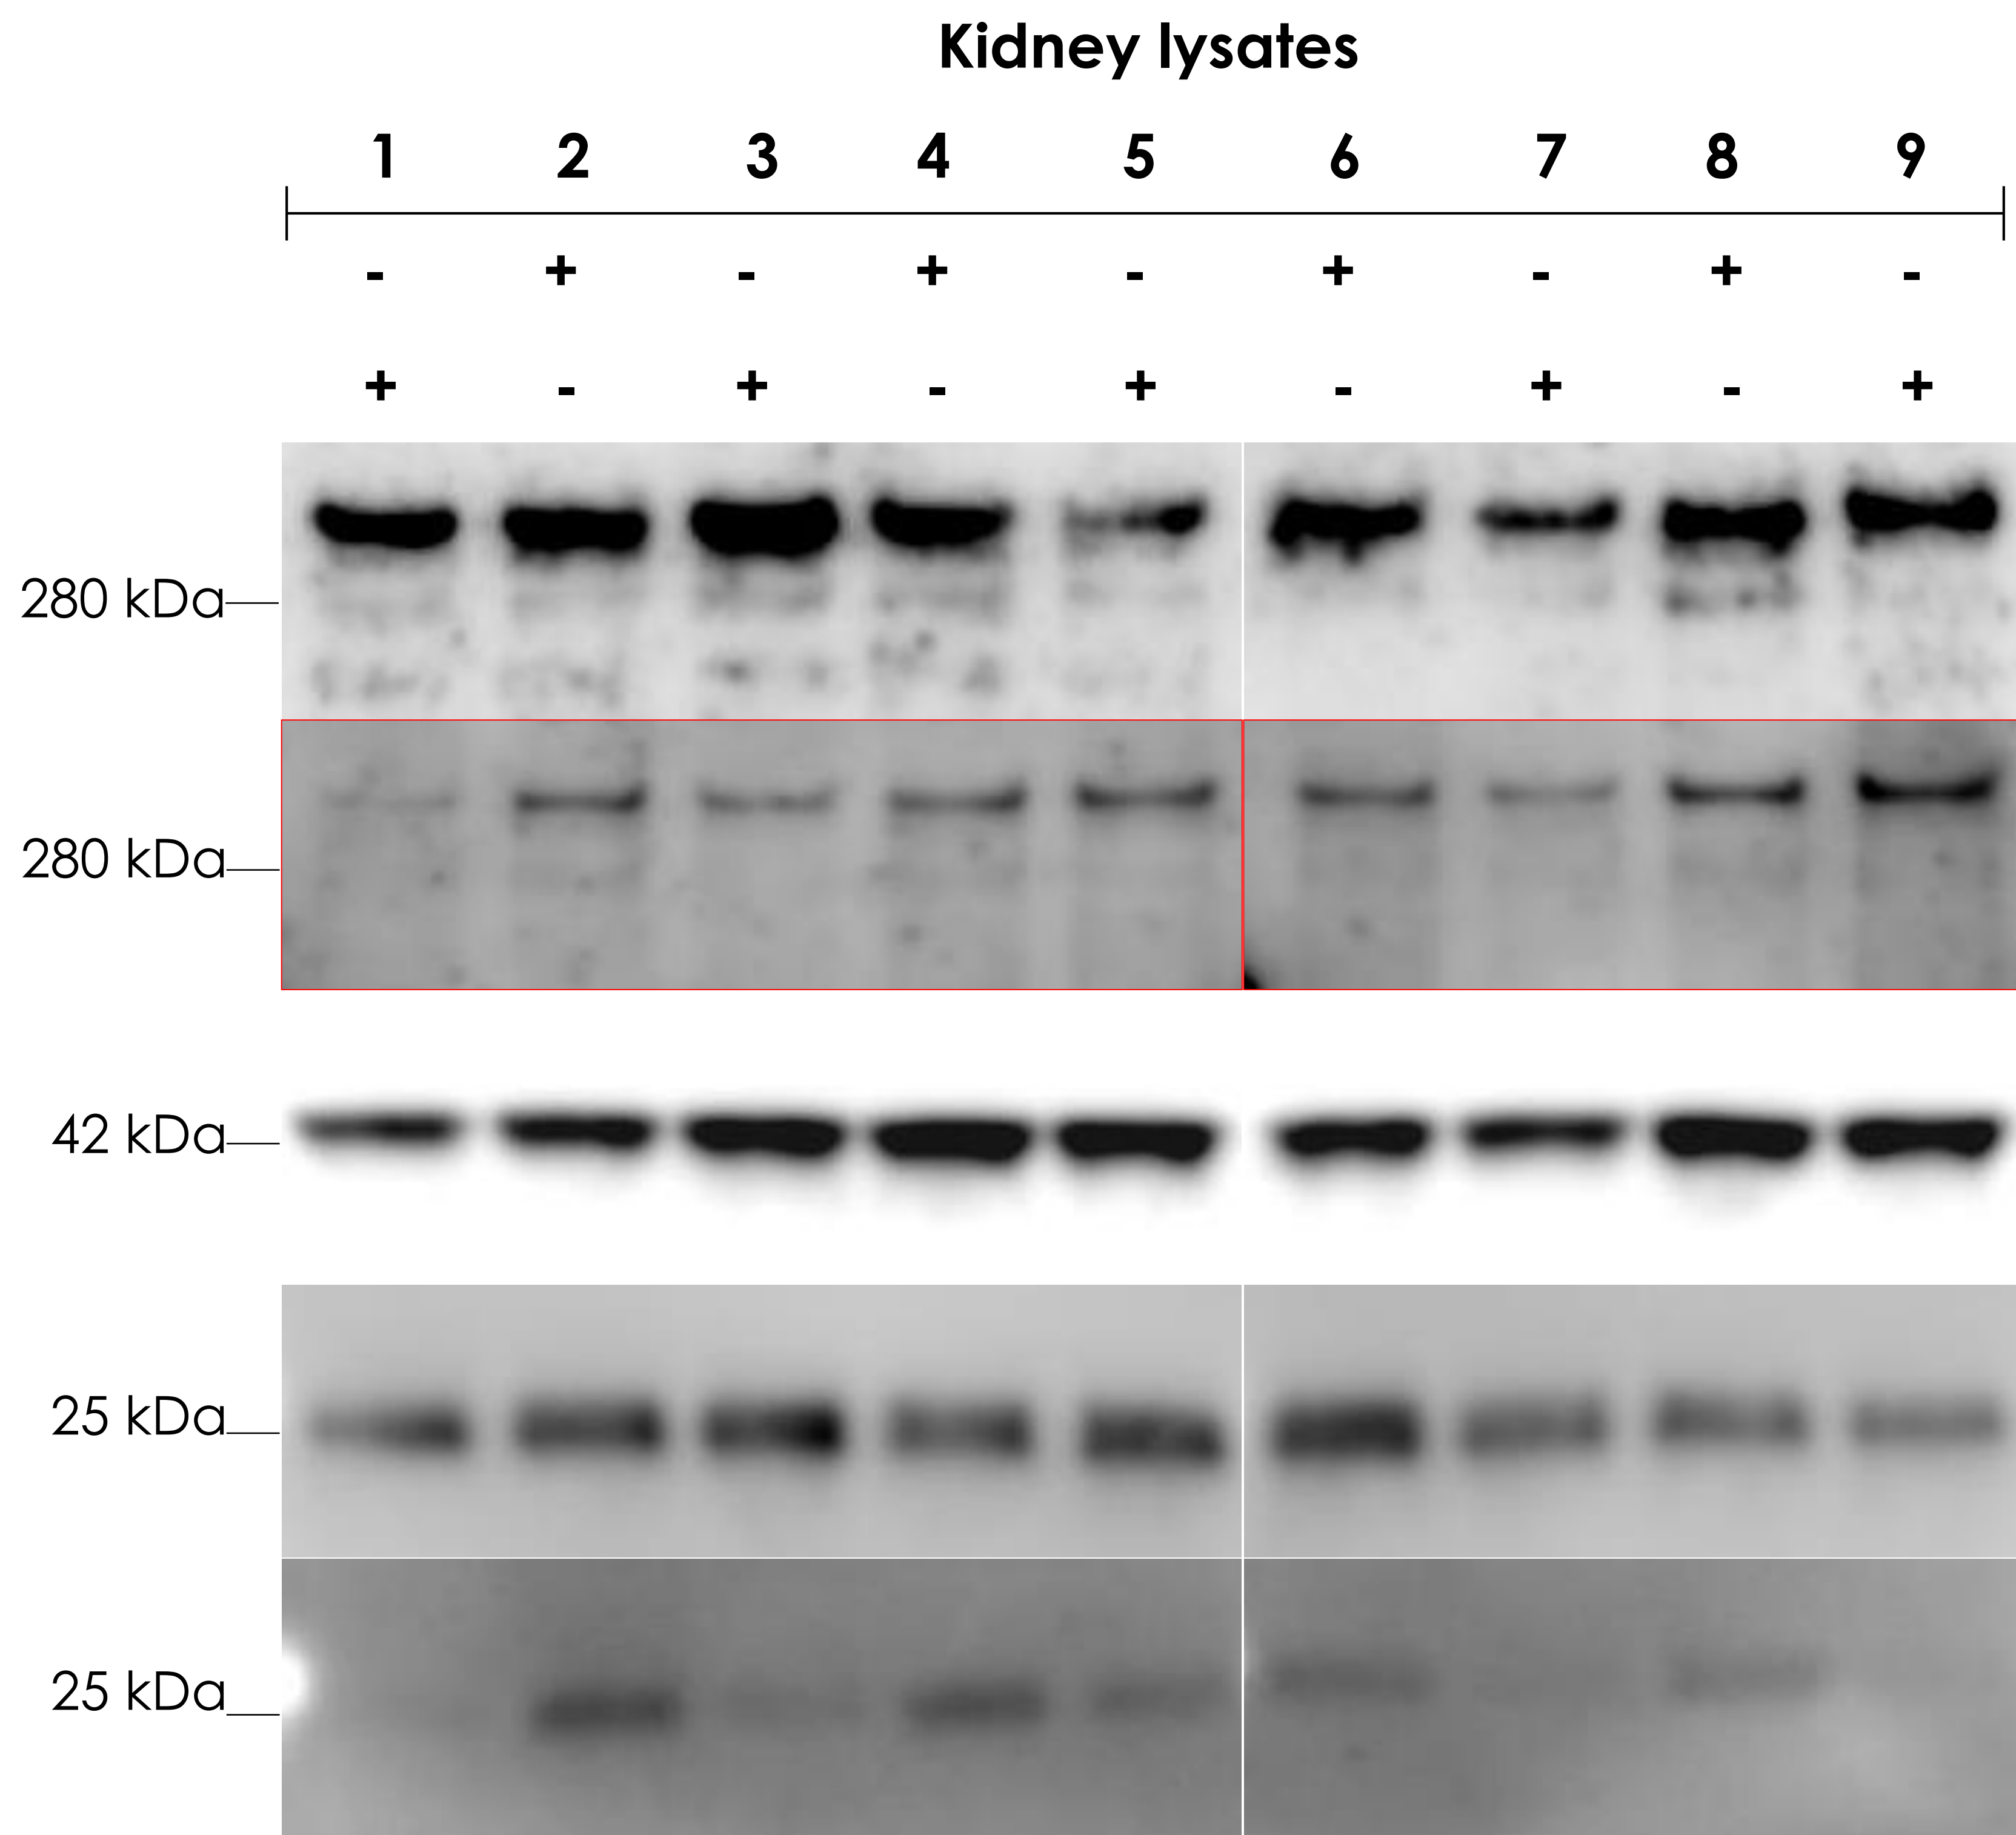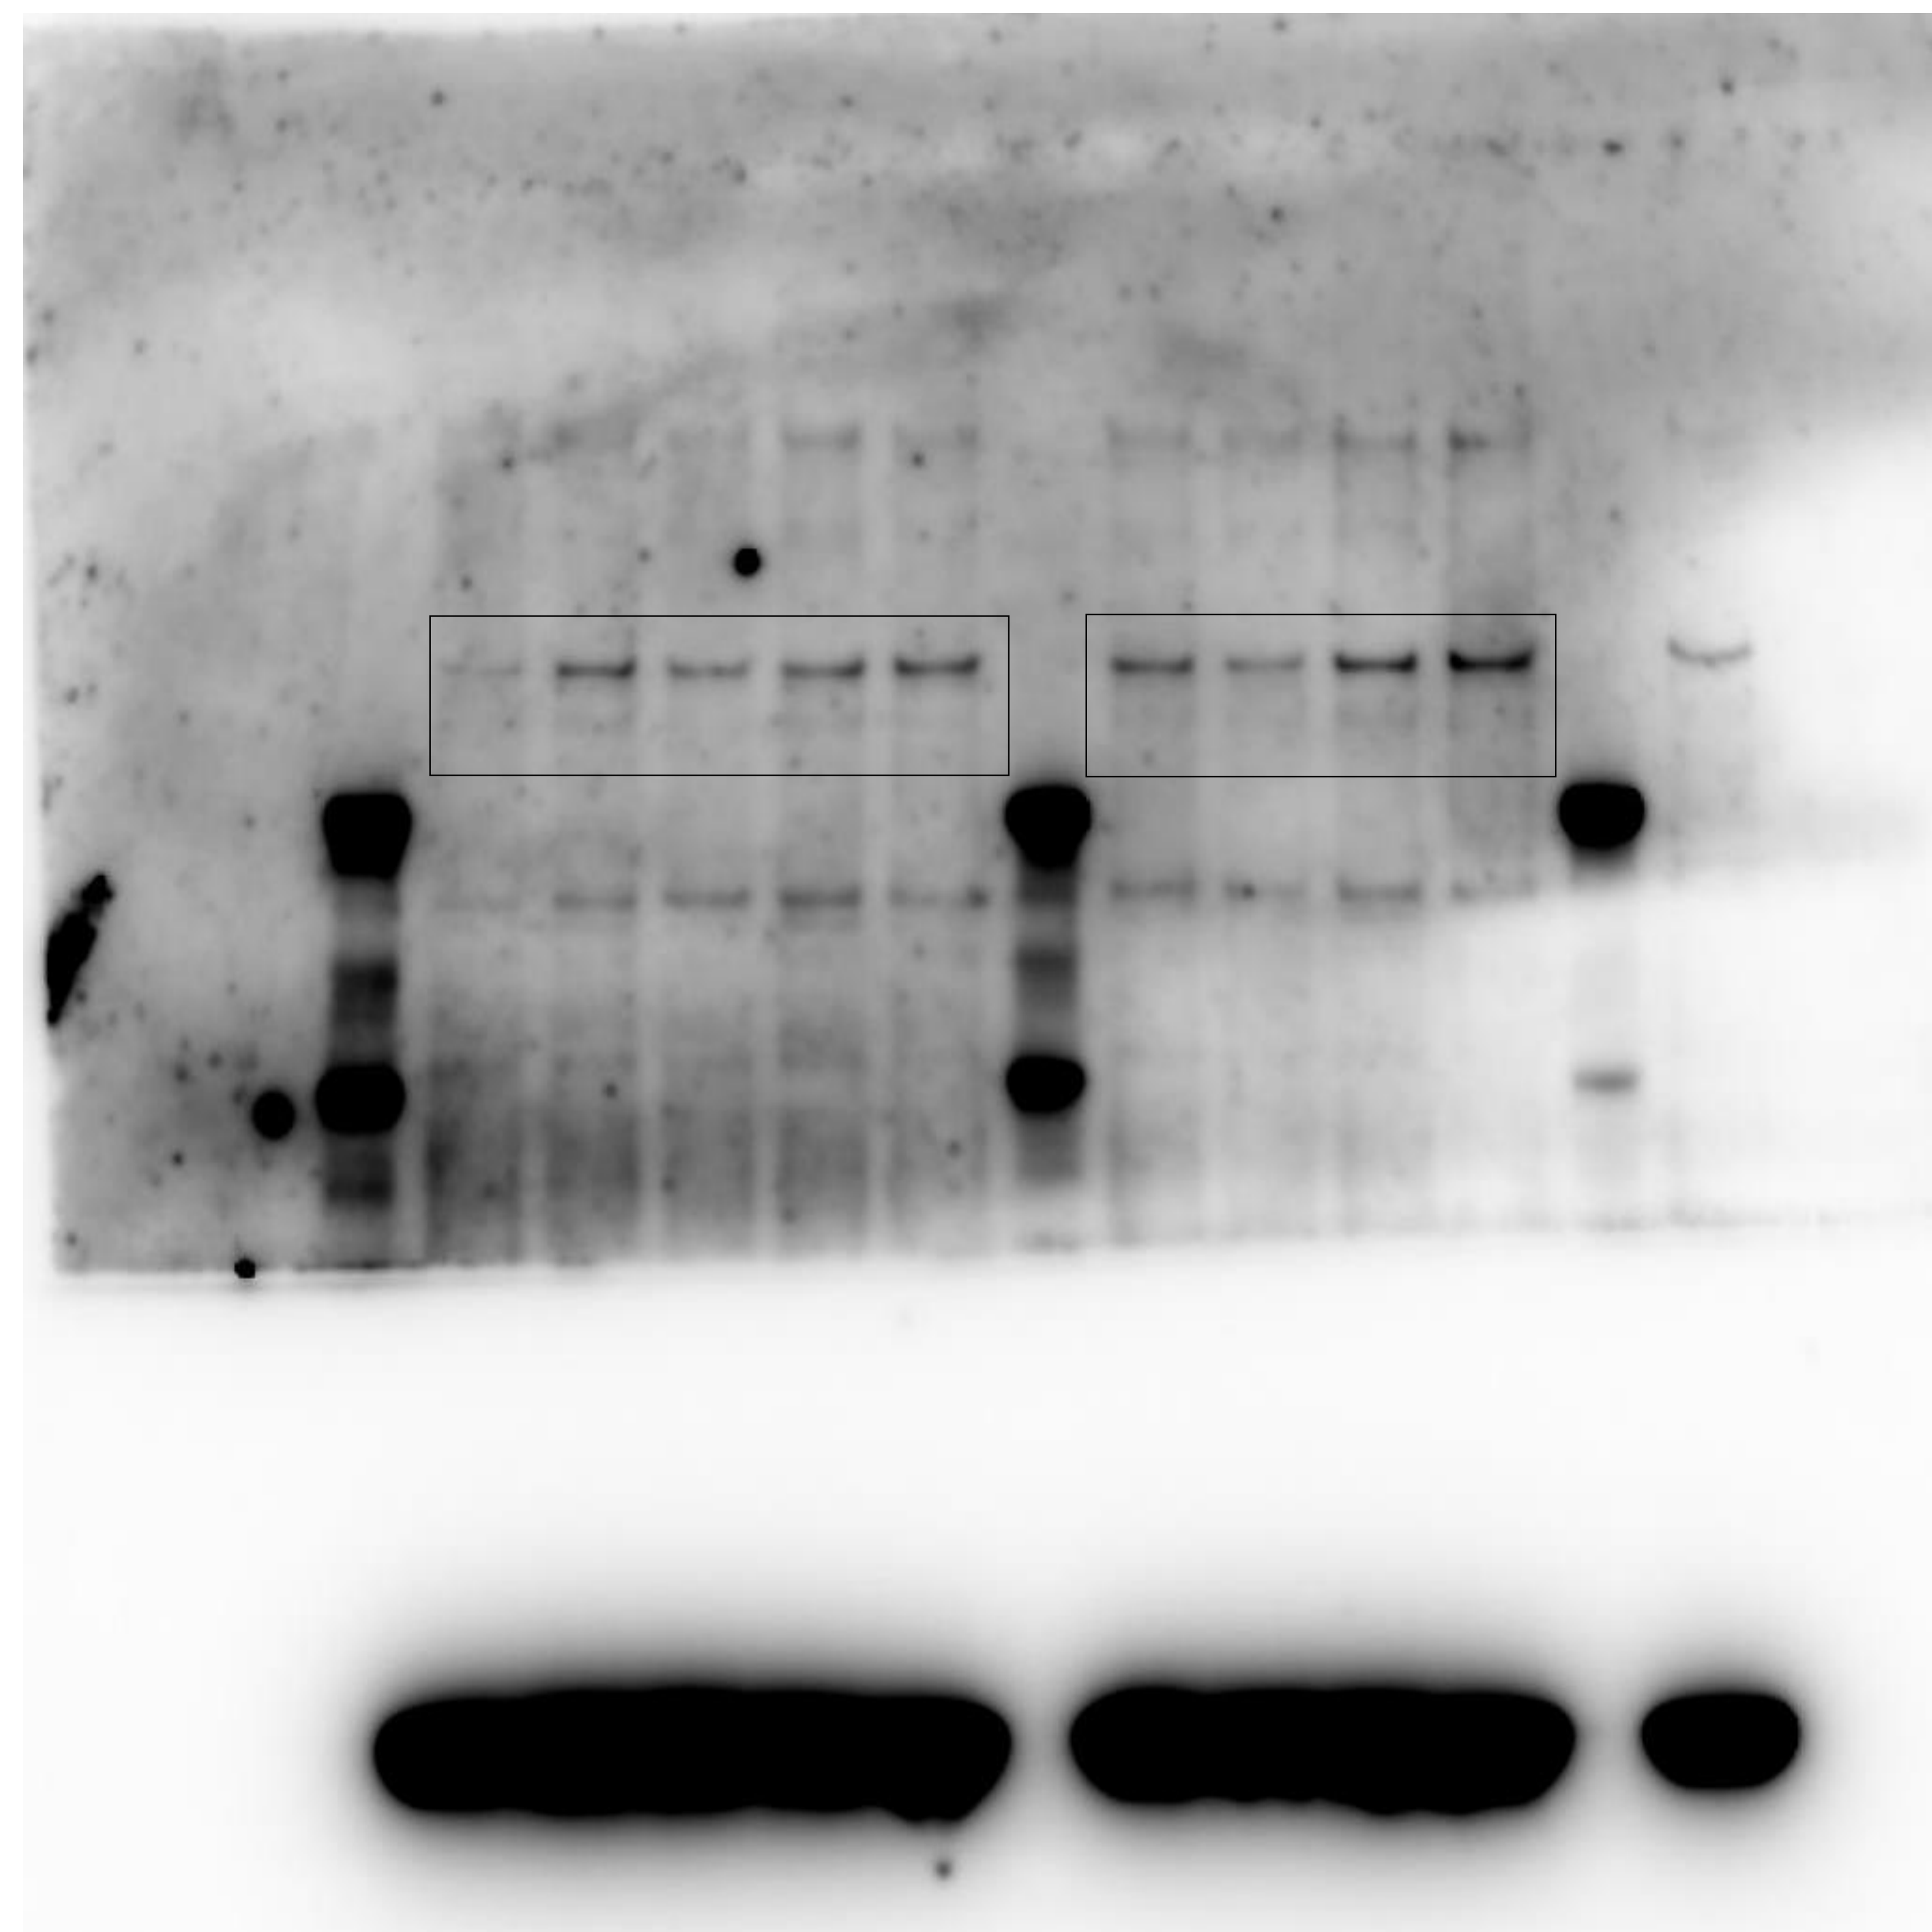

Figure 5a

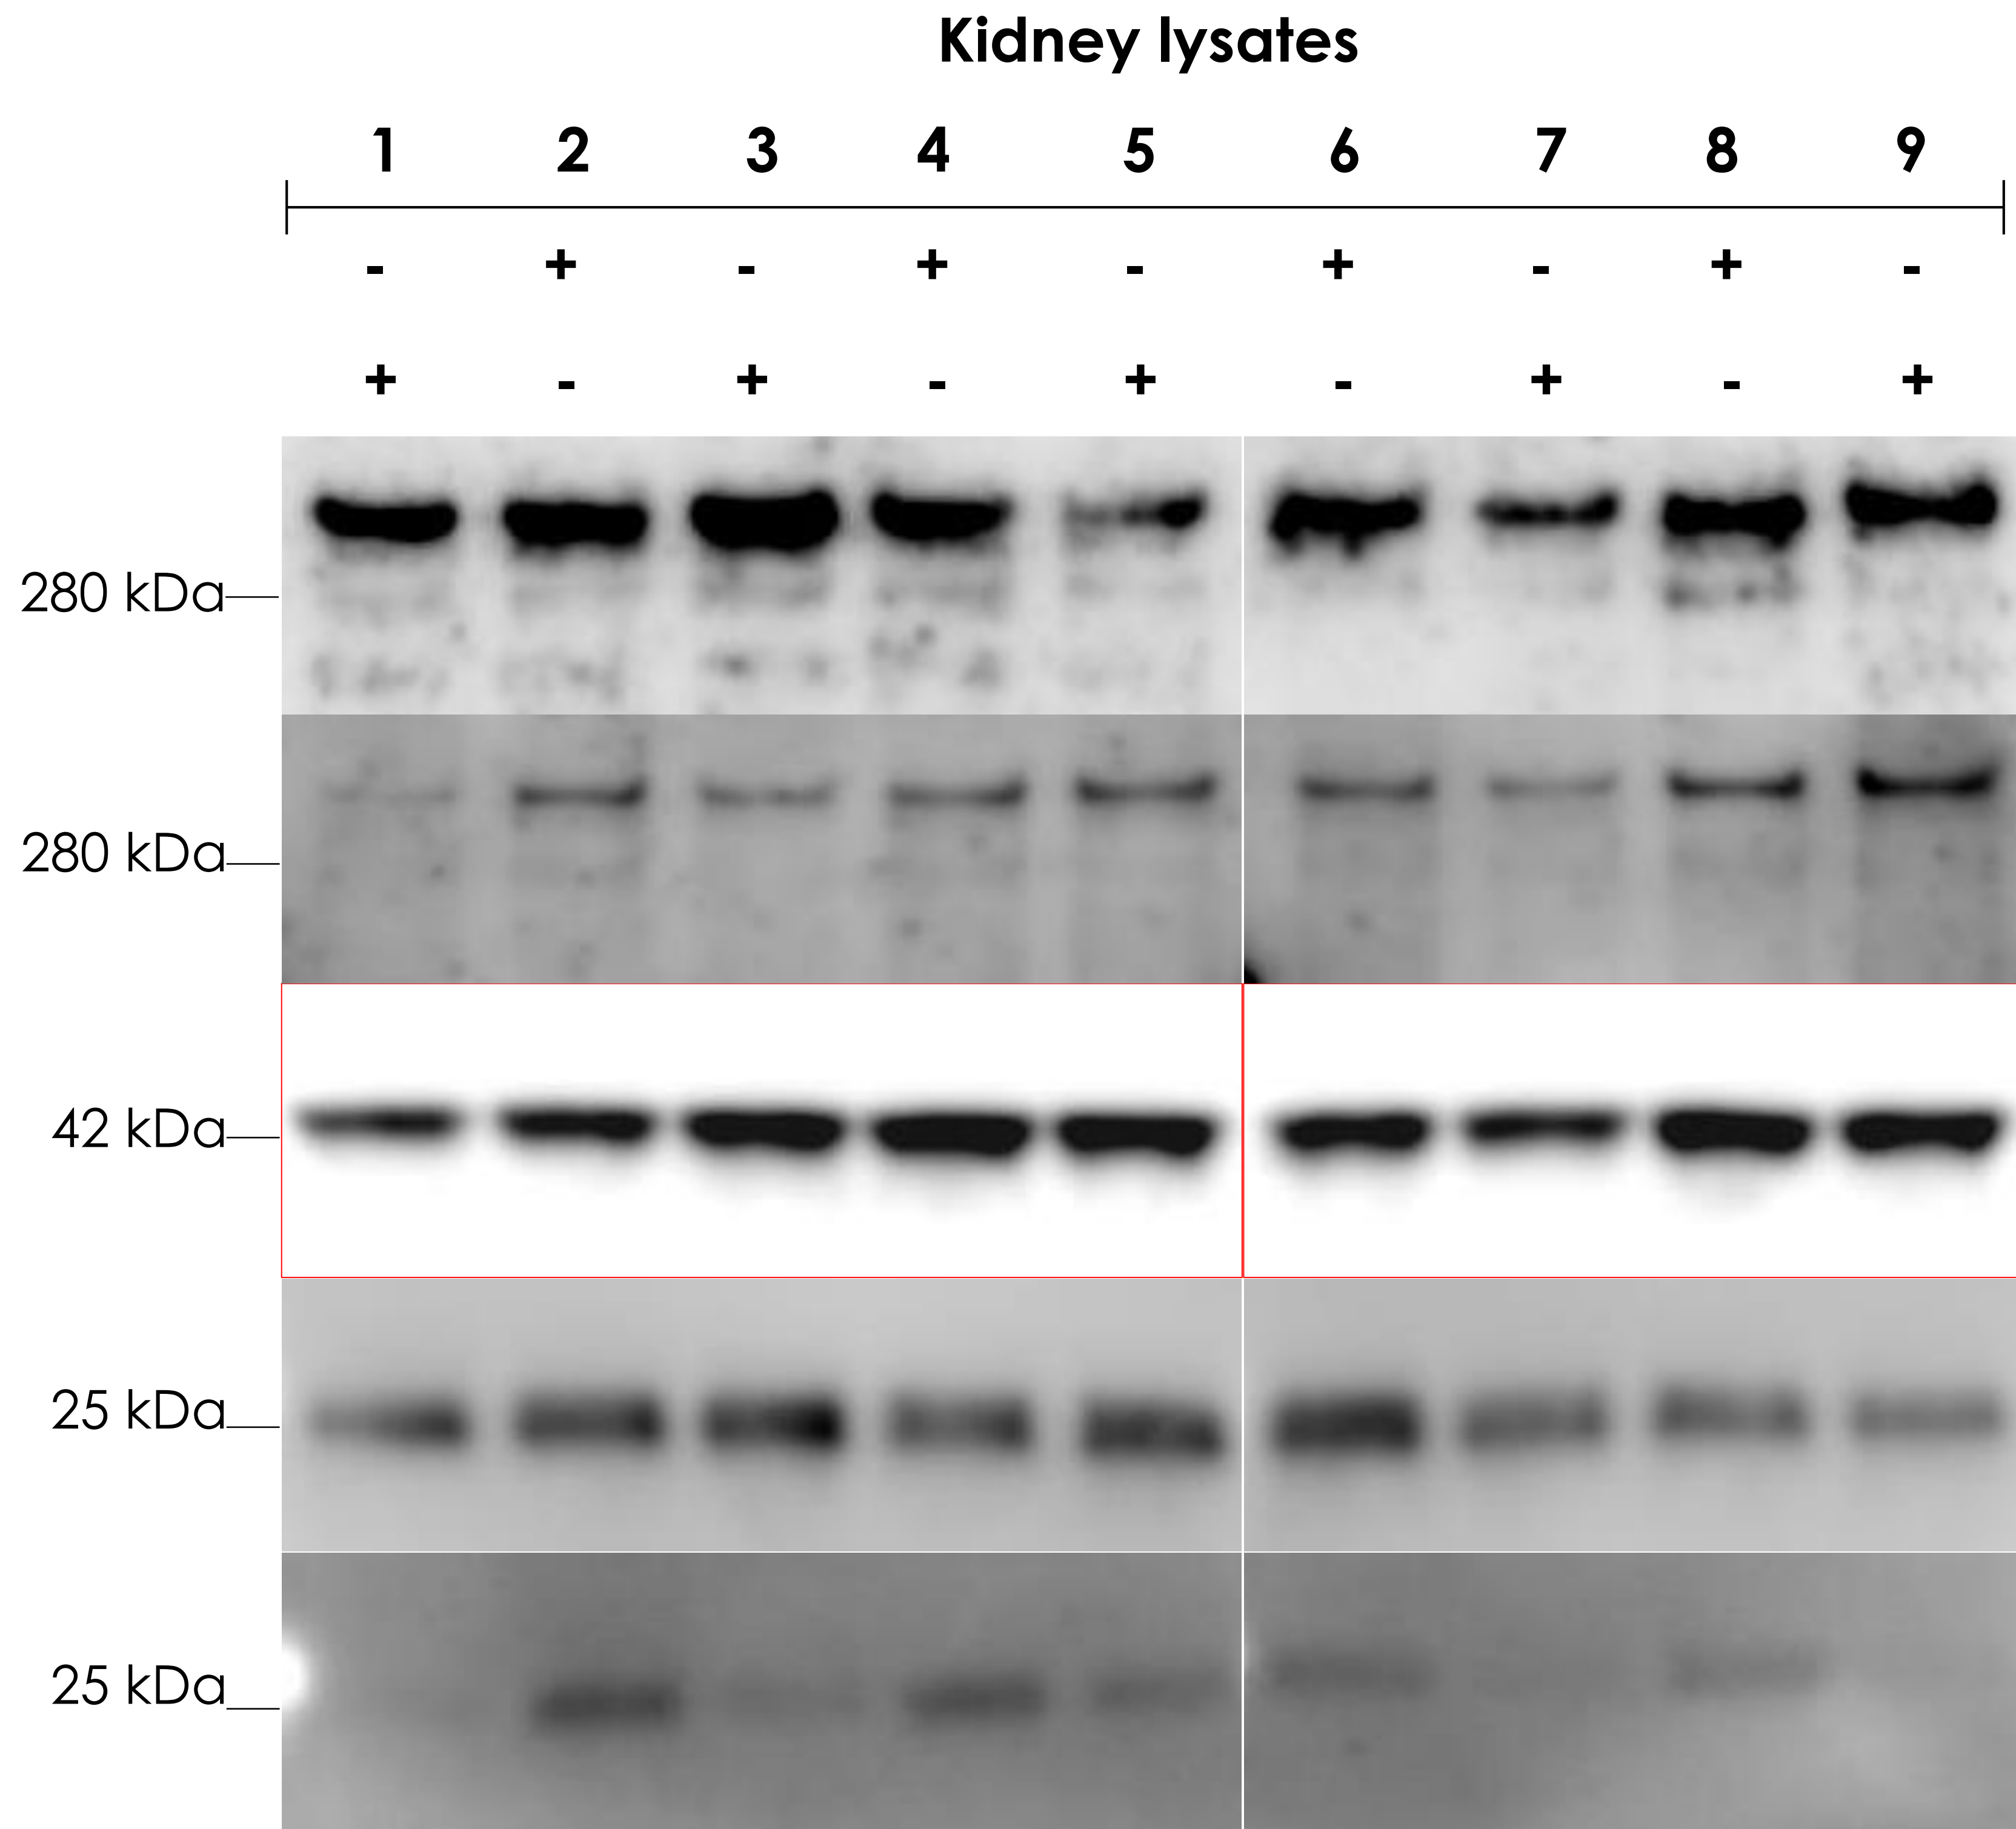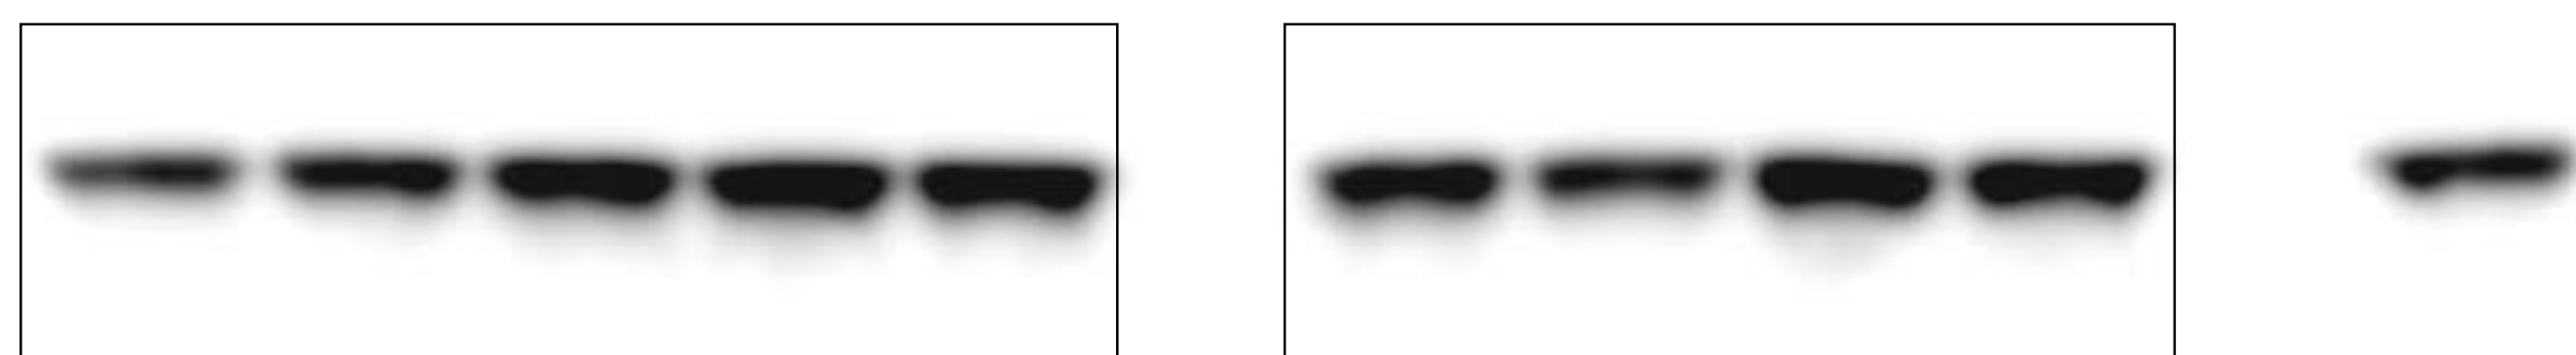



Figure 5a

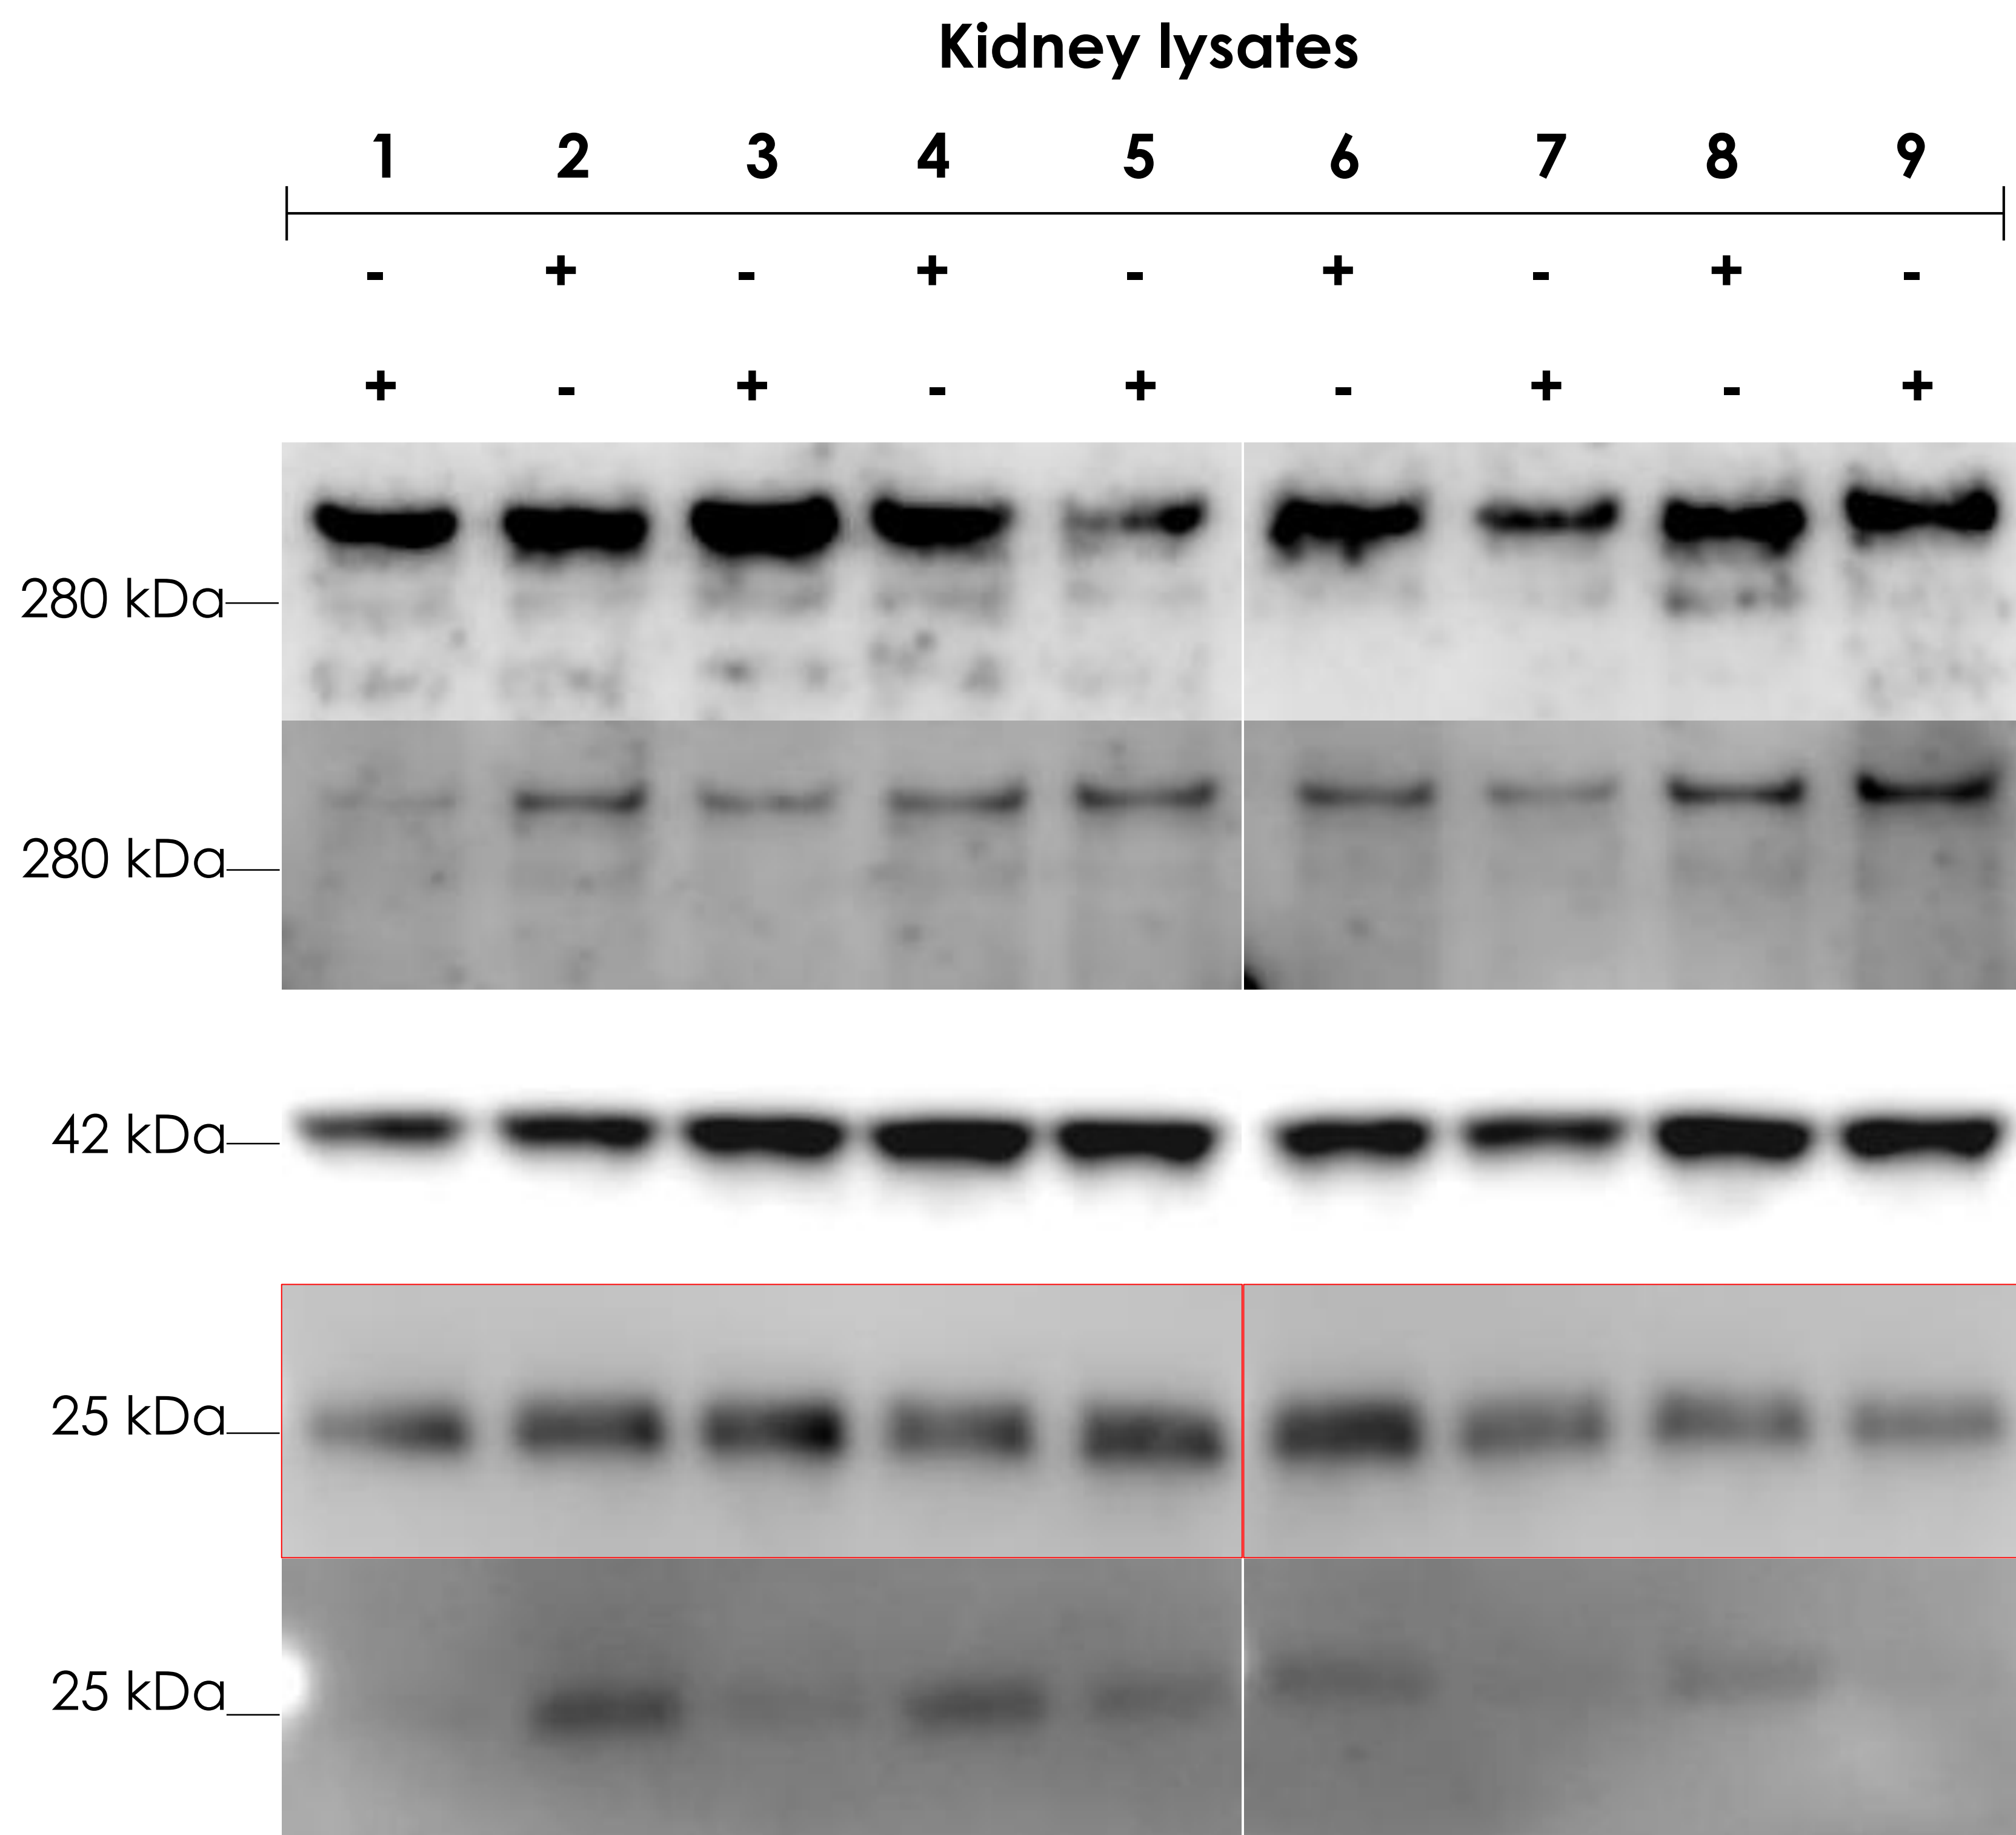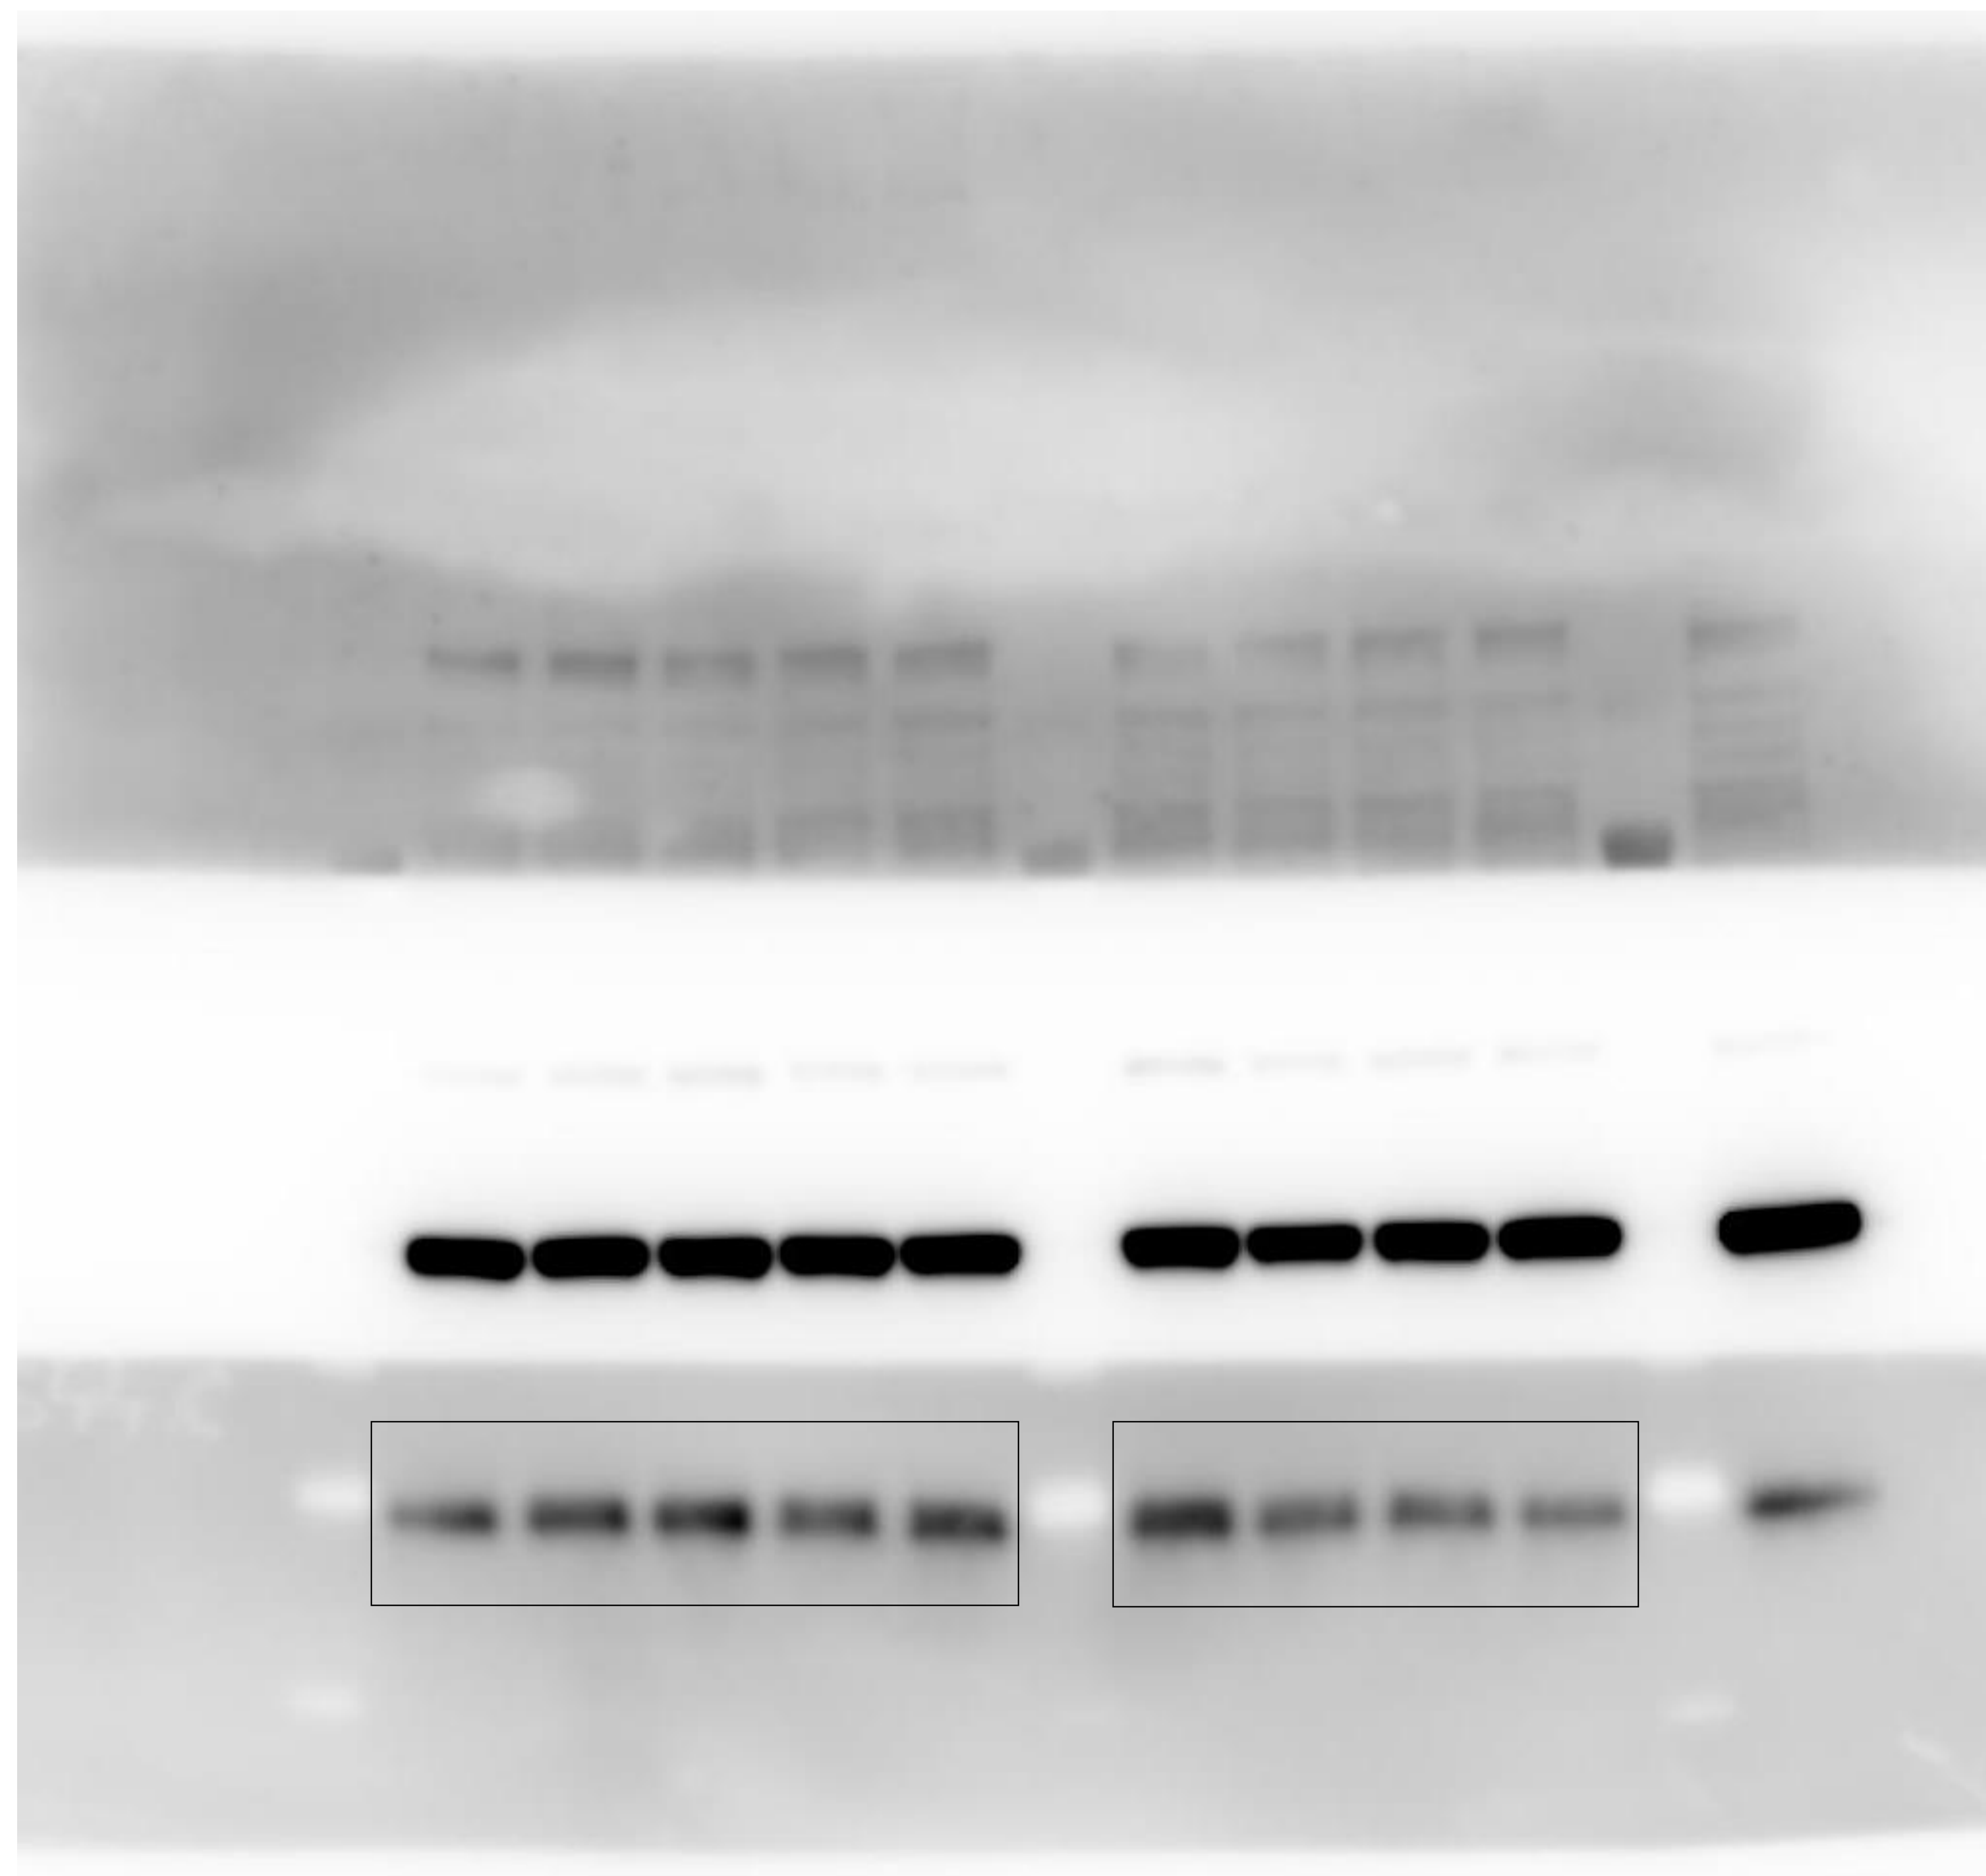

Figure 5a

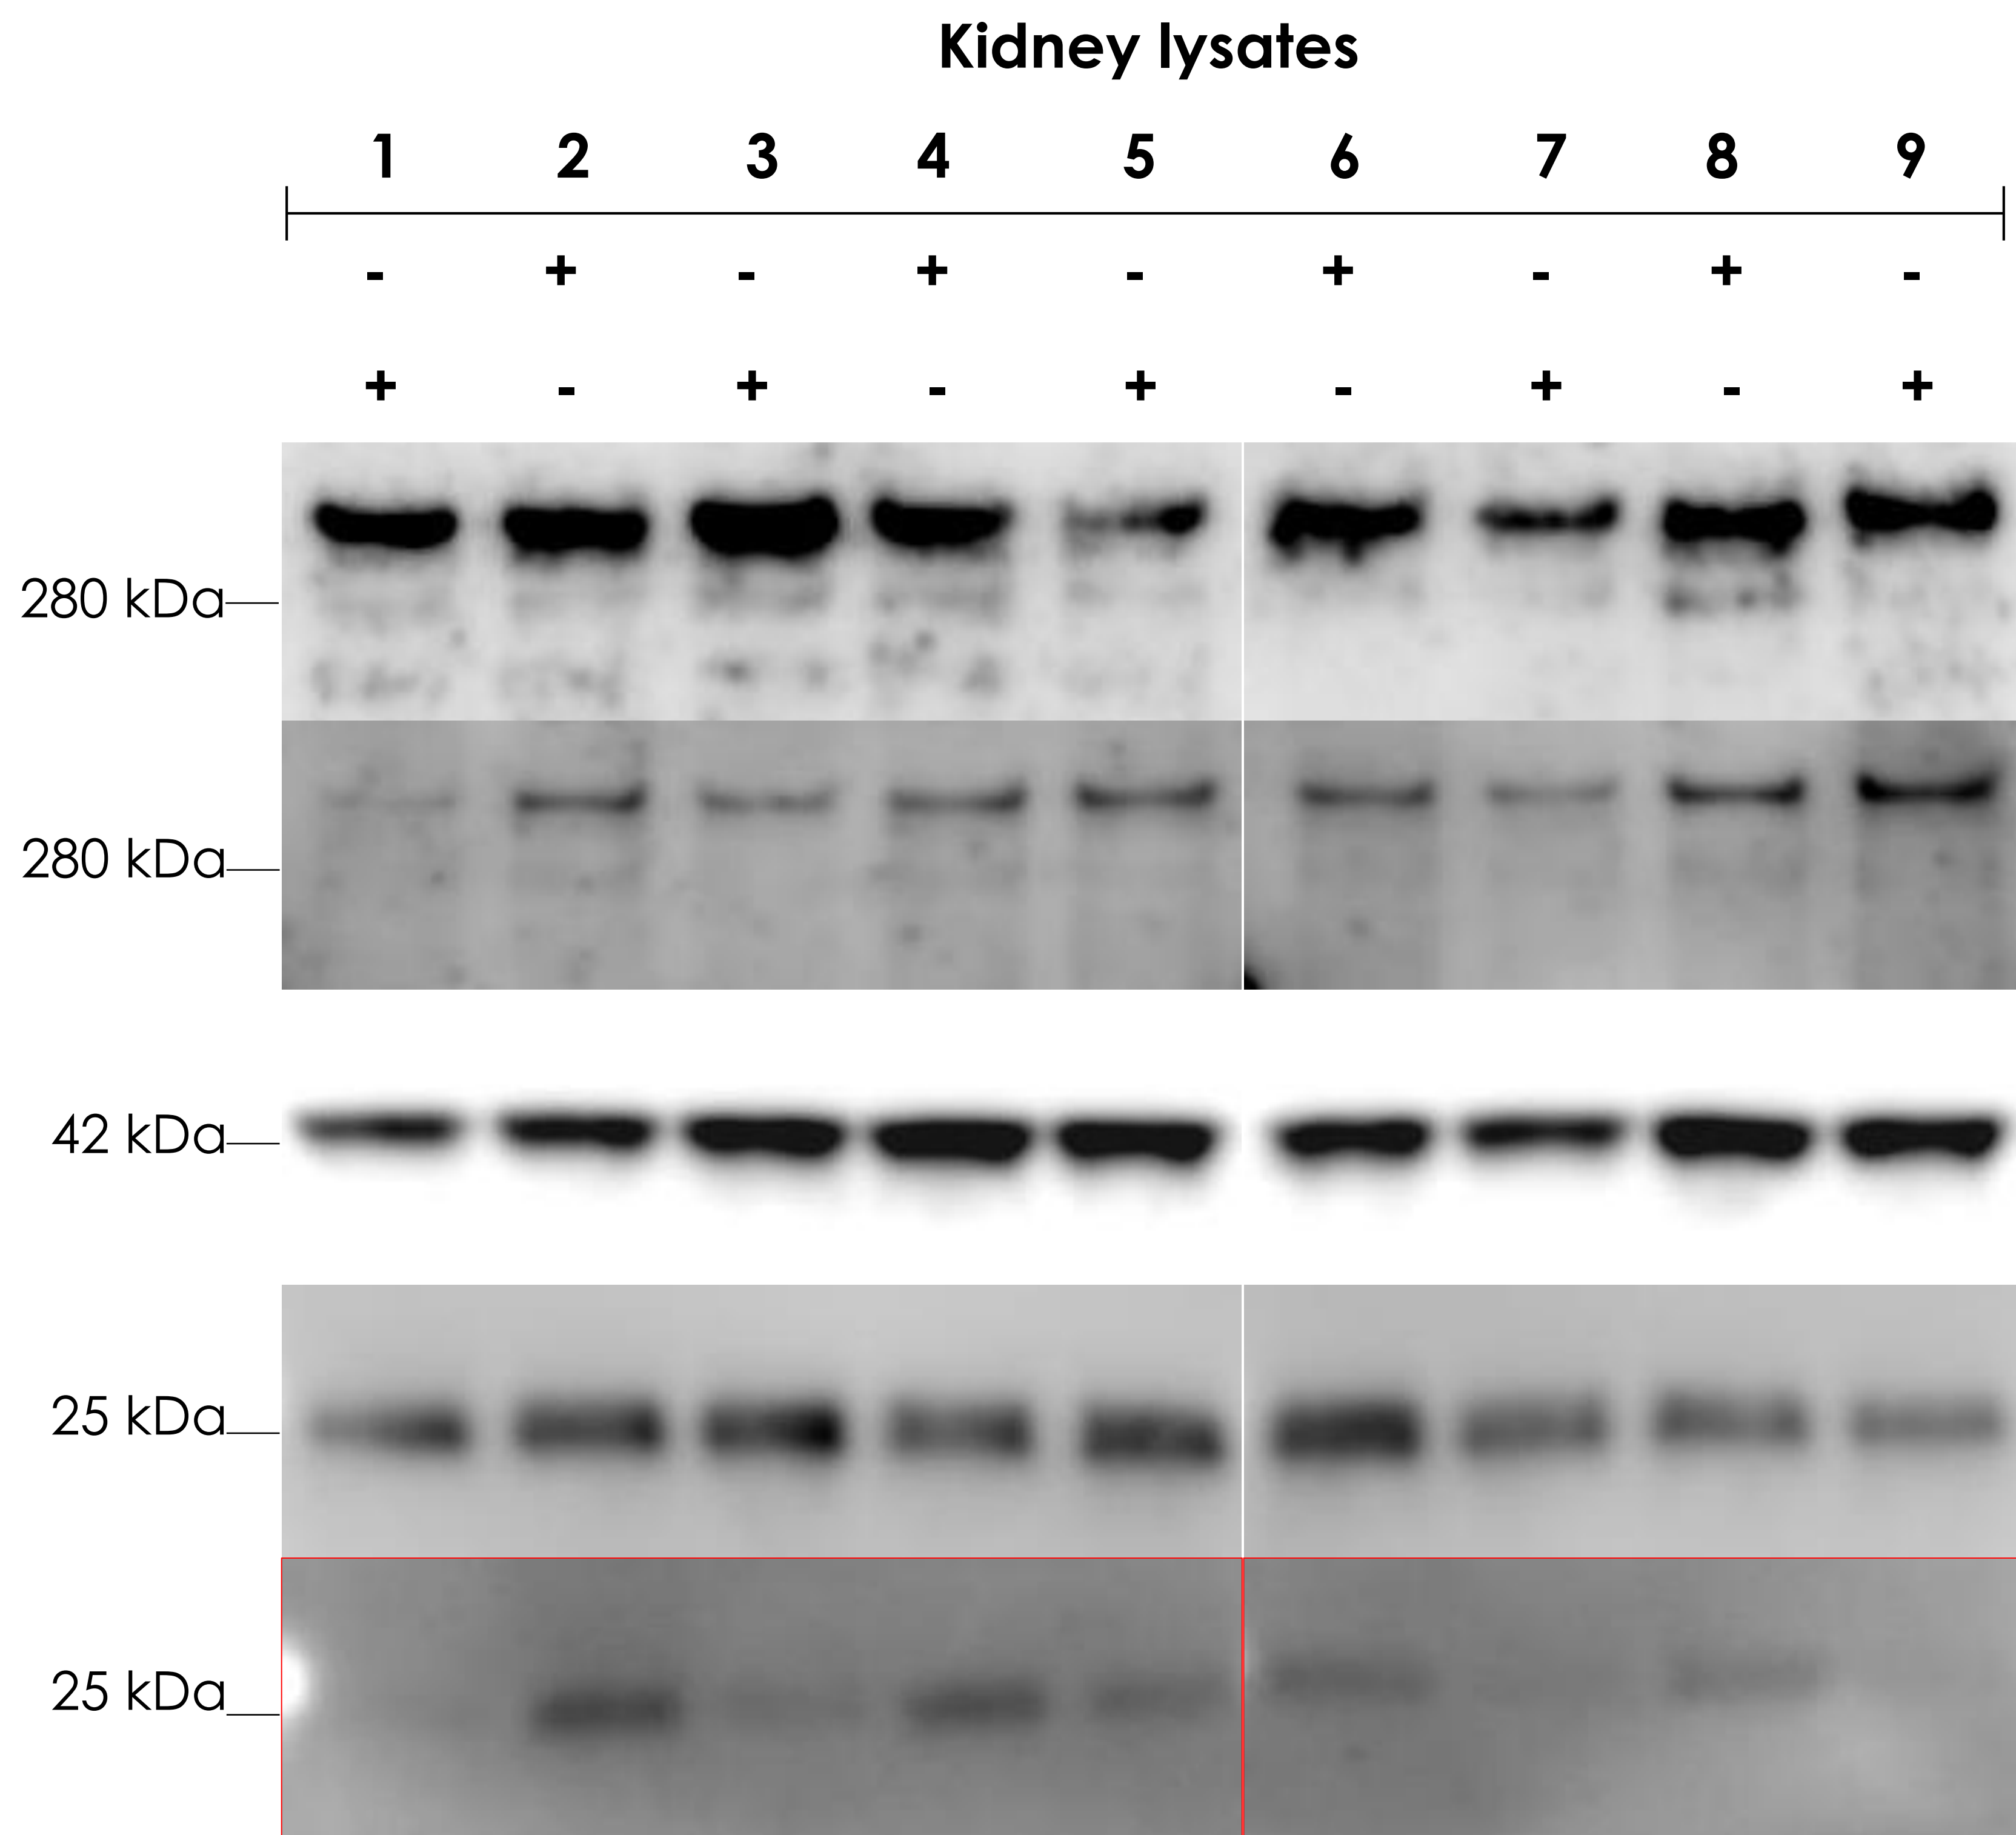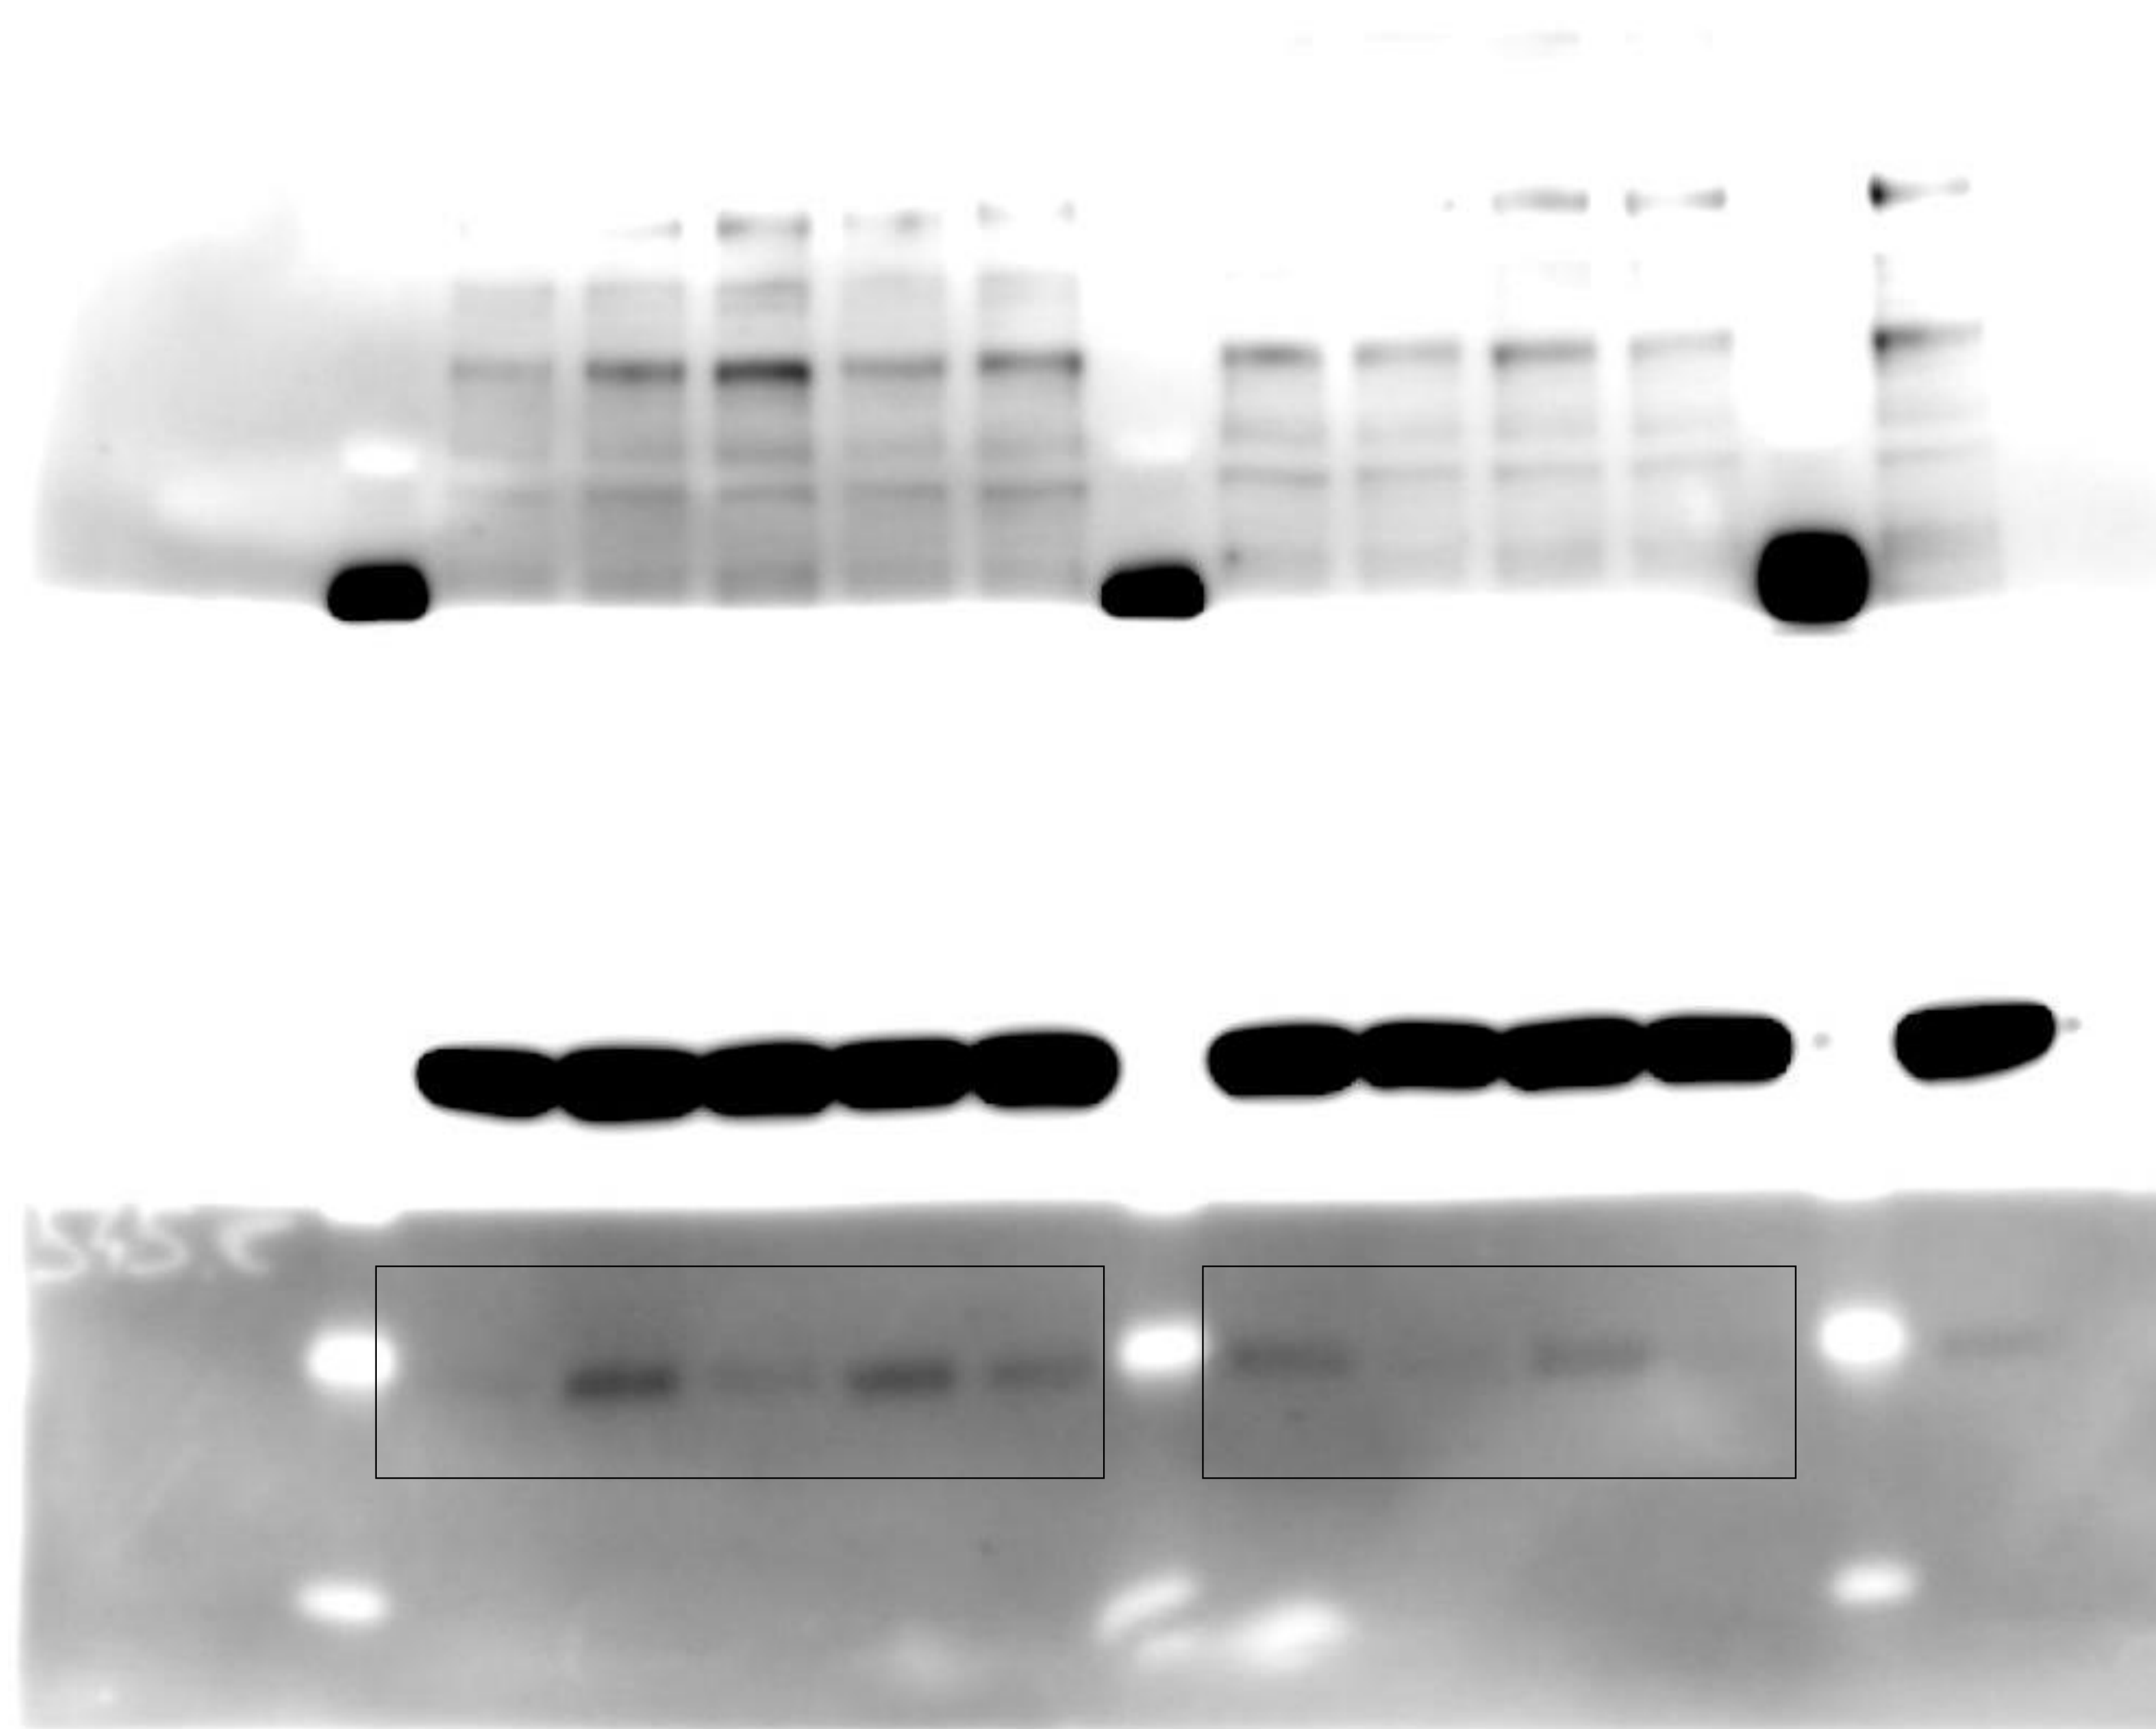

Figure 5a

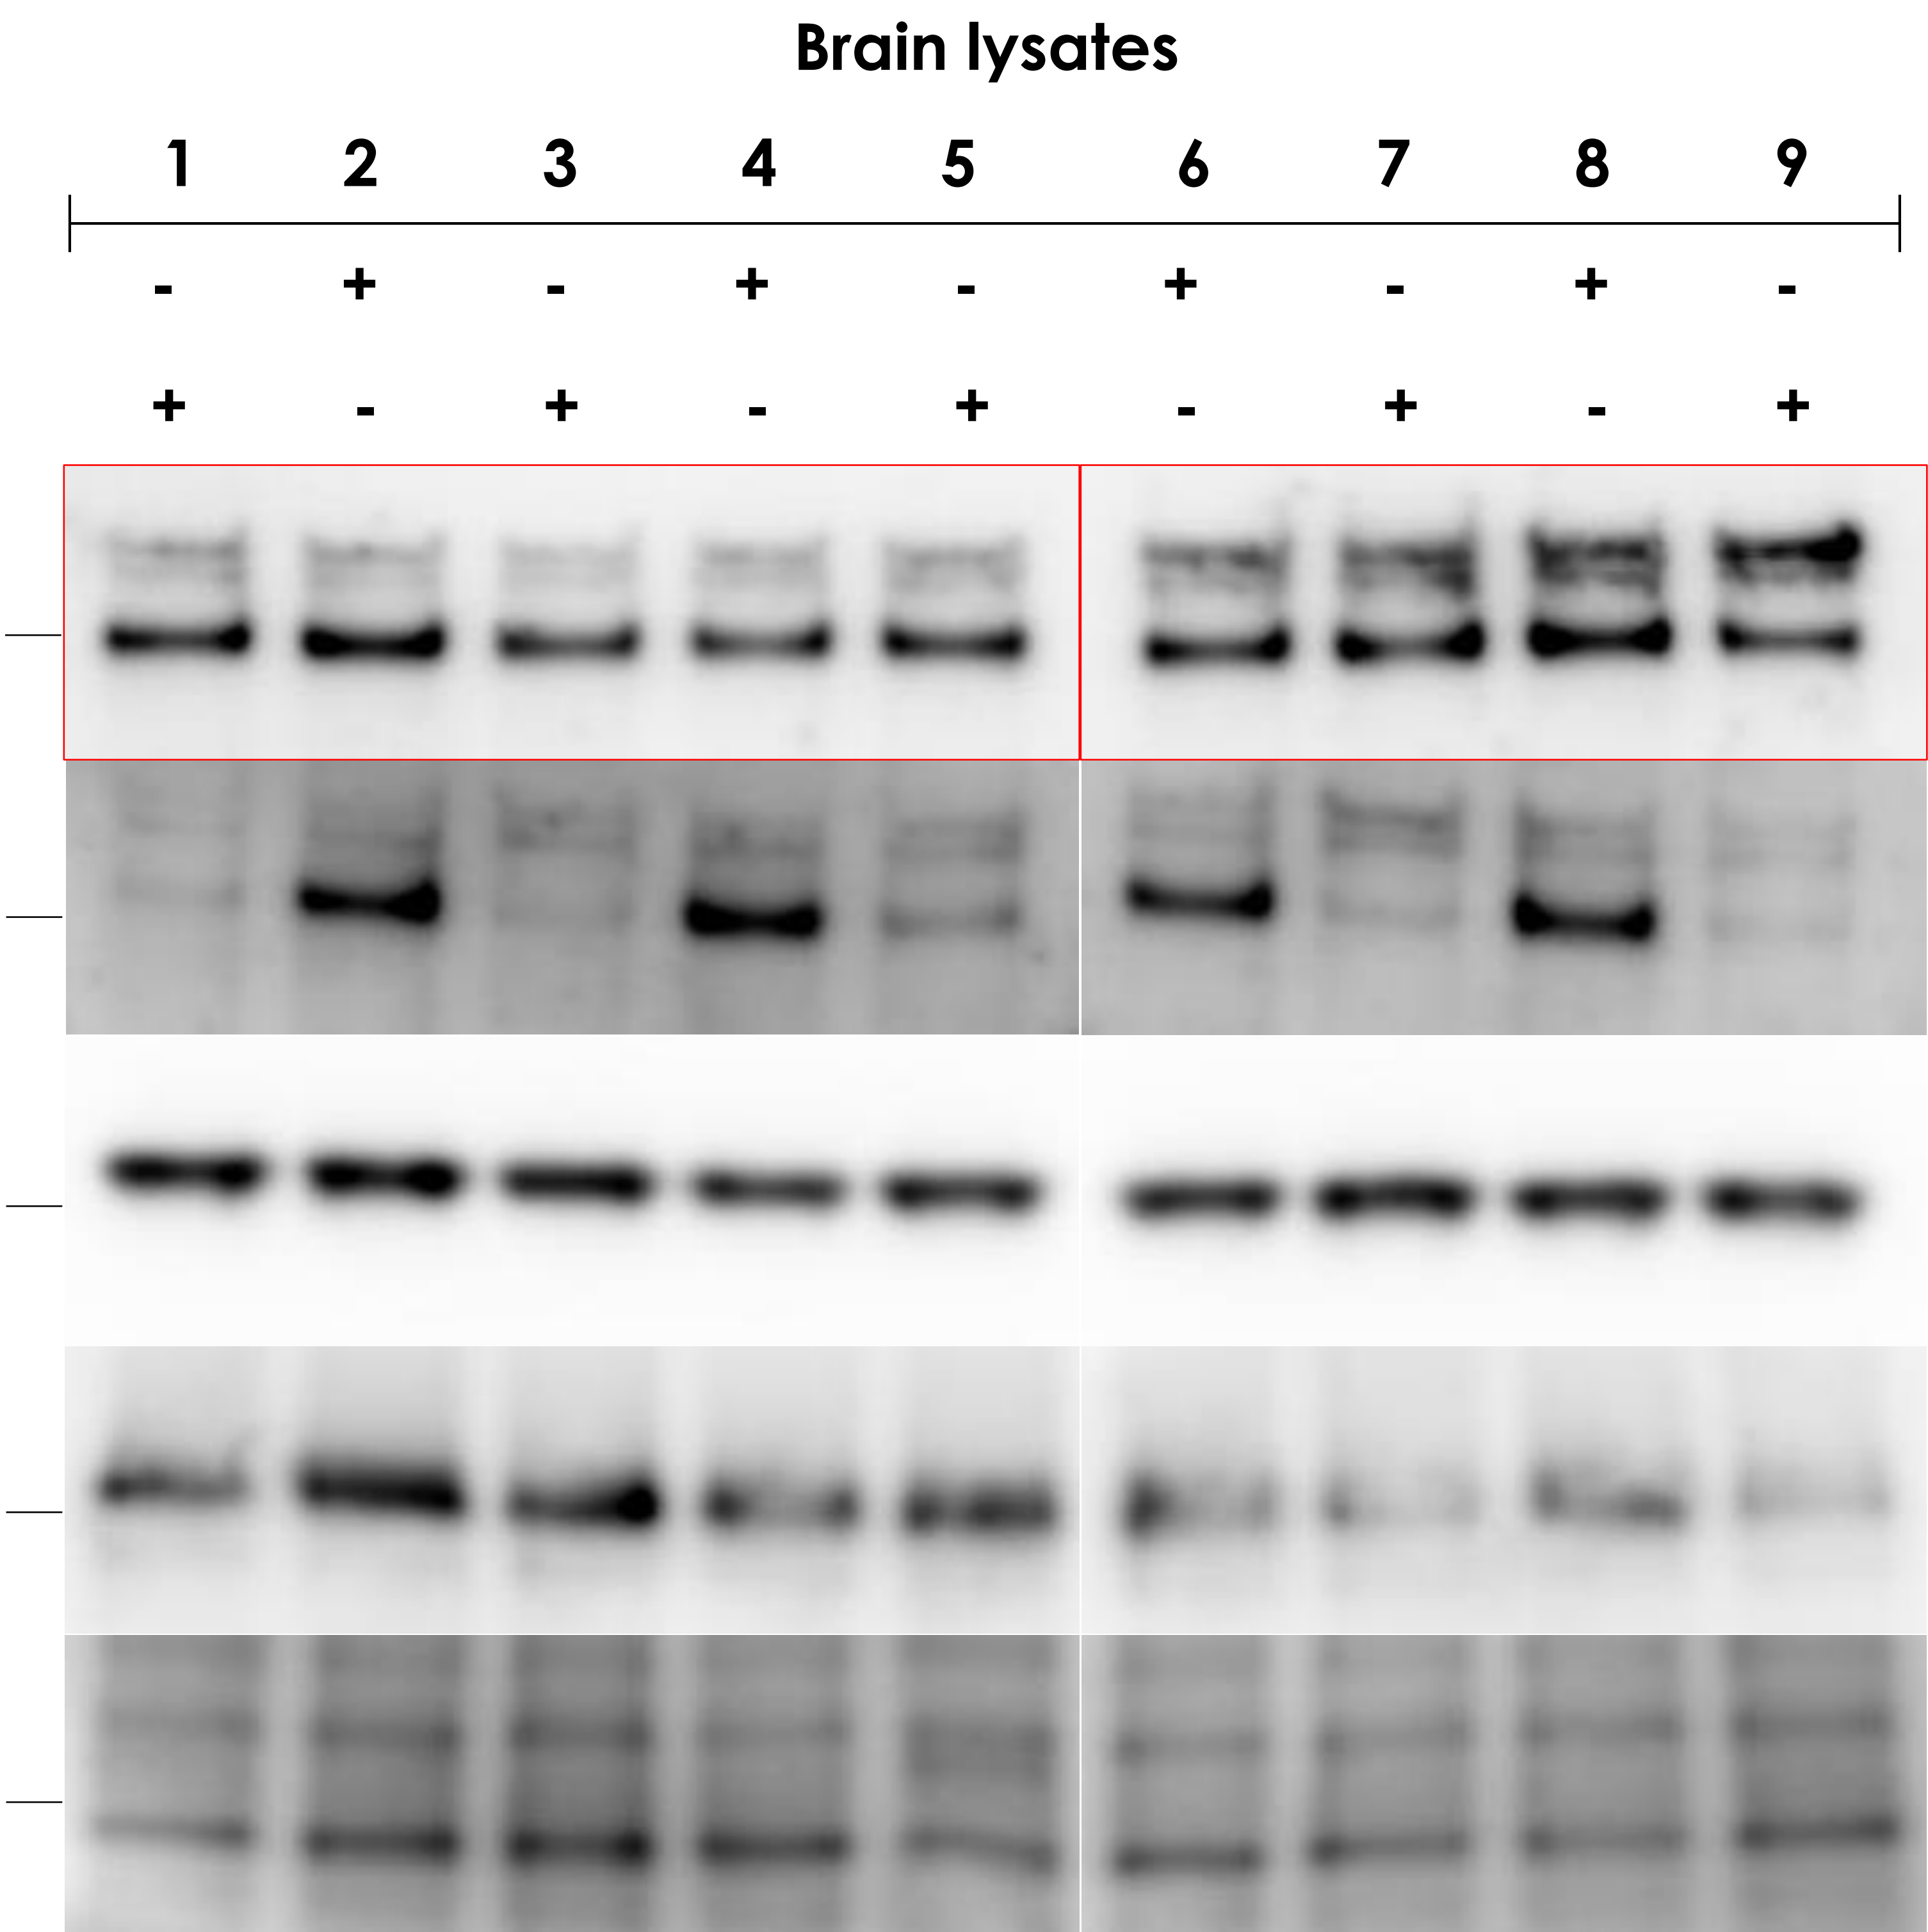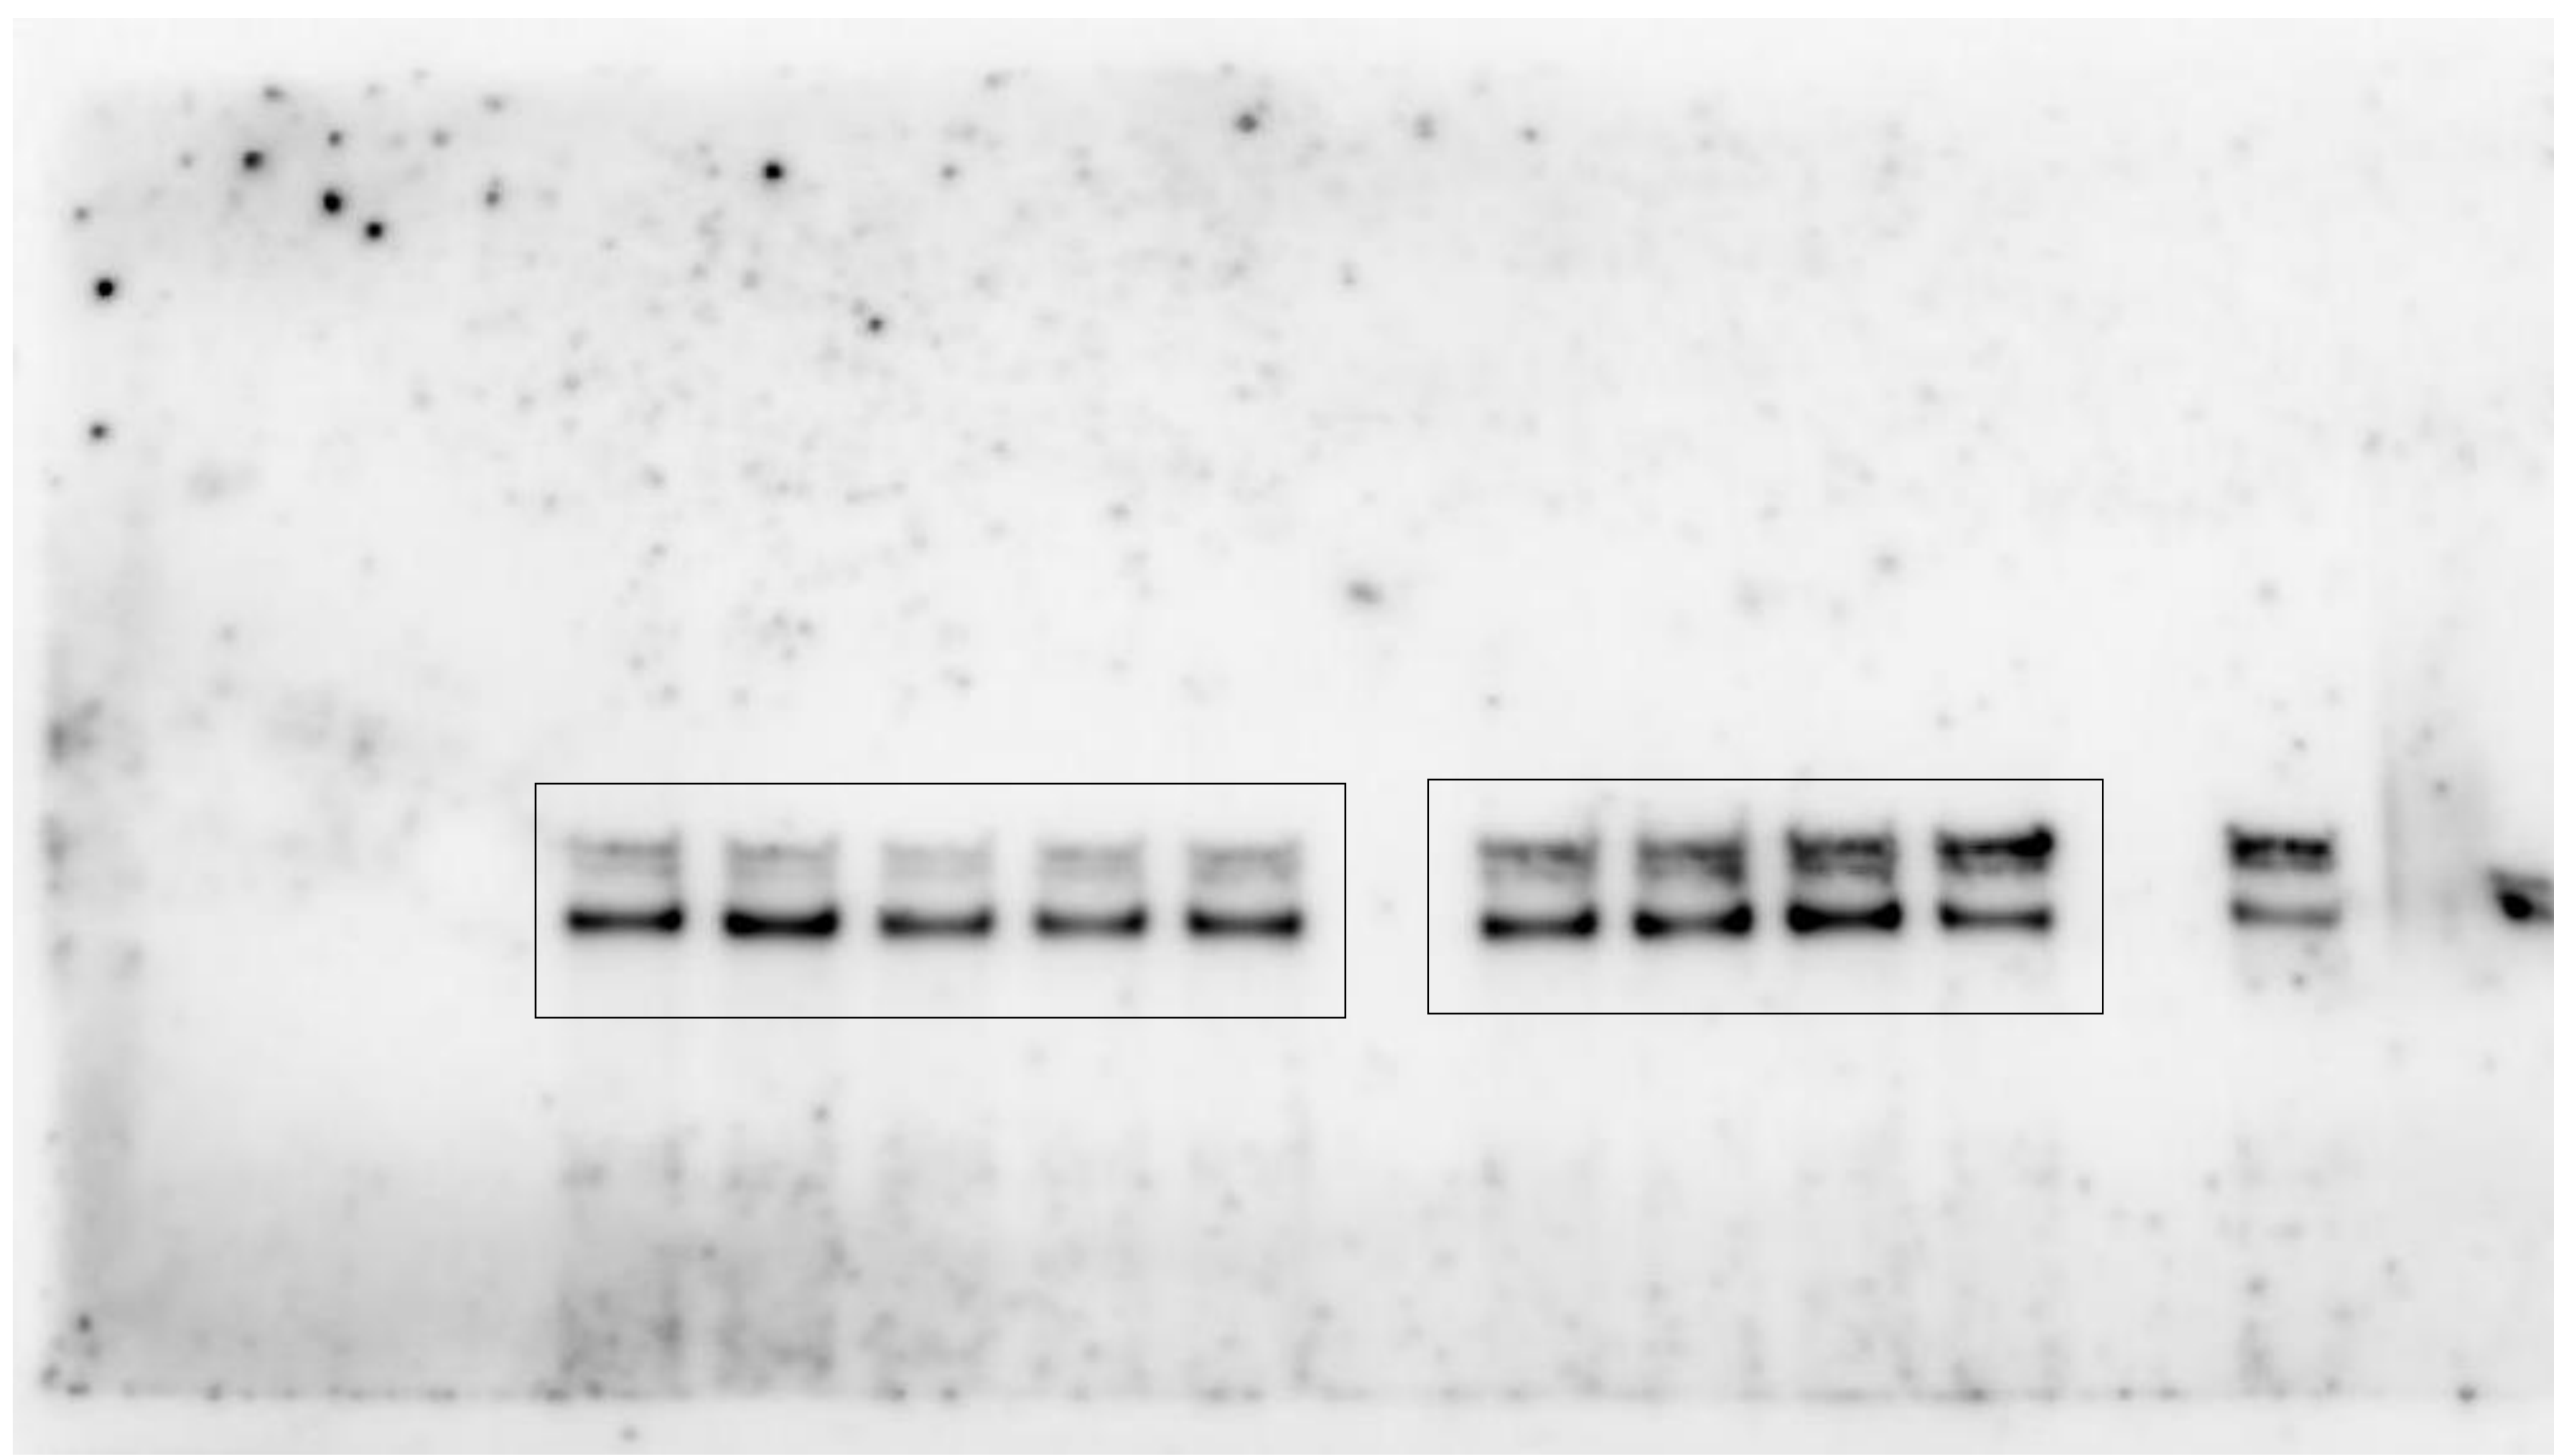

Figure 5a

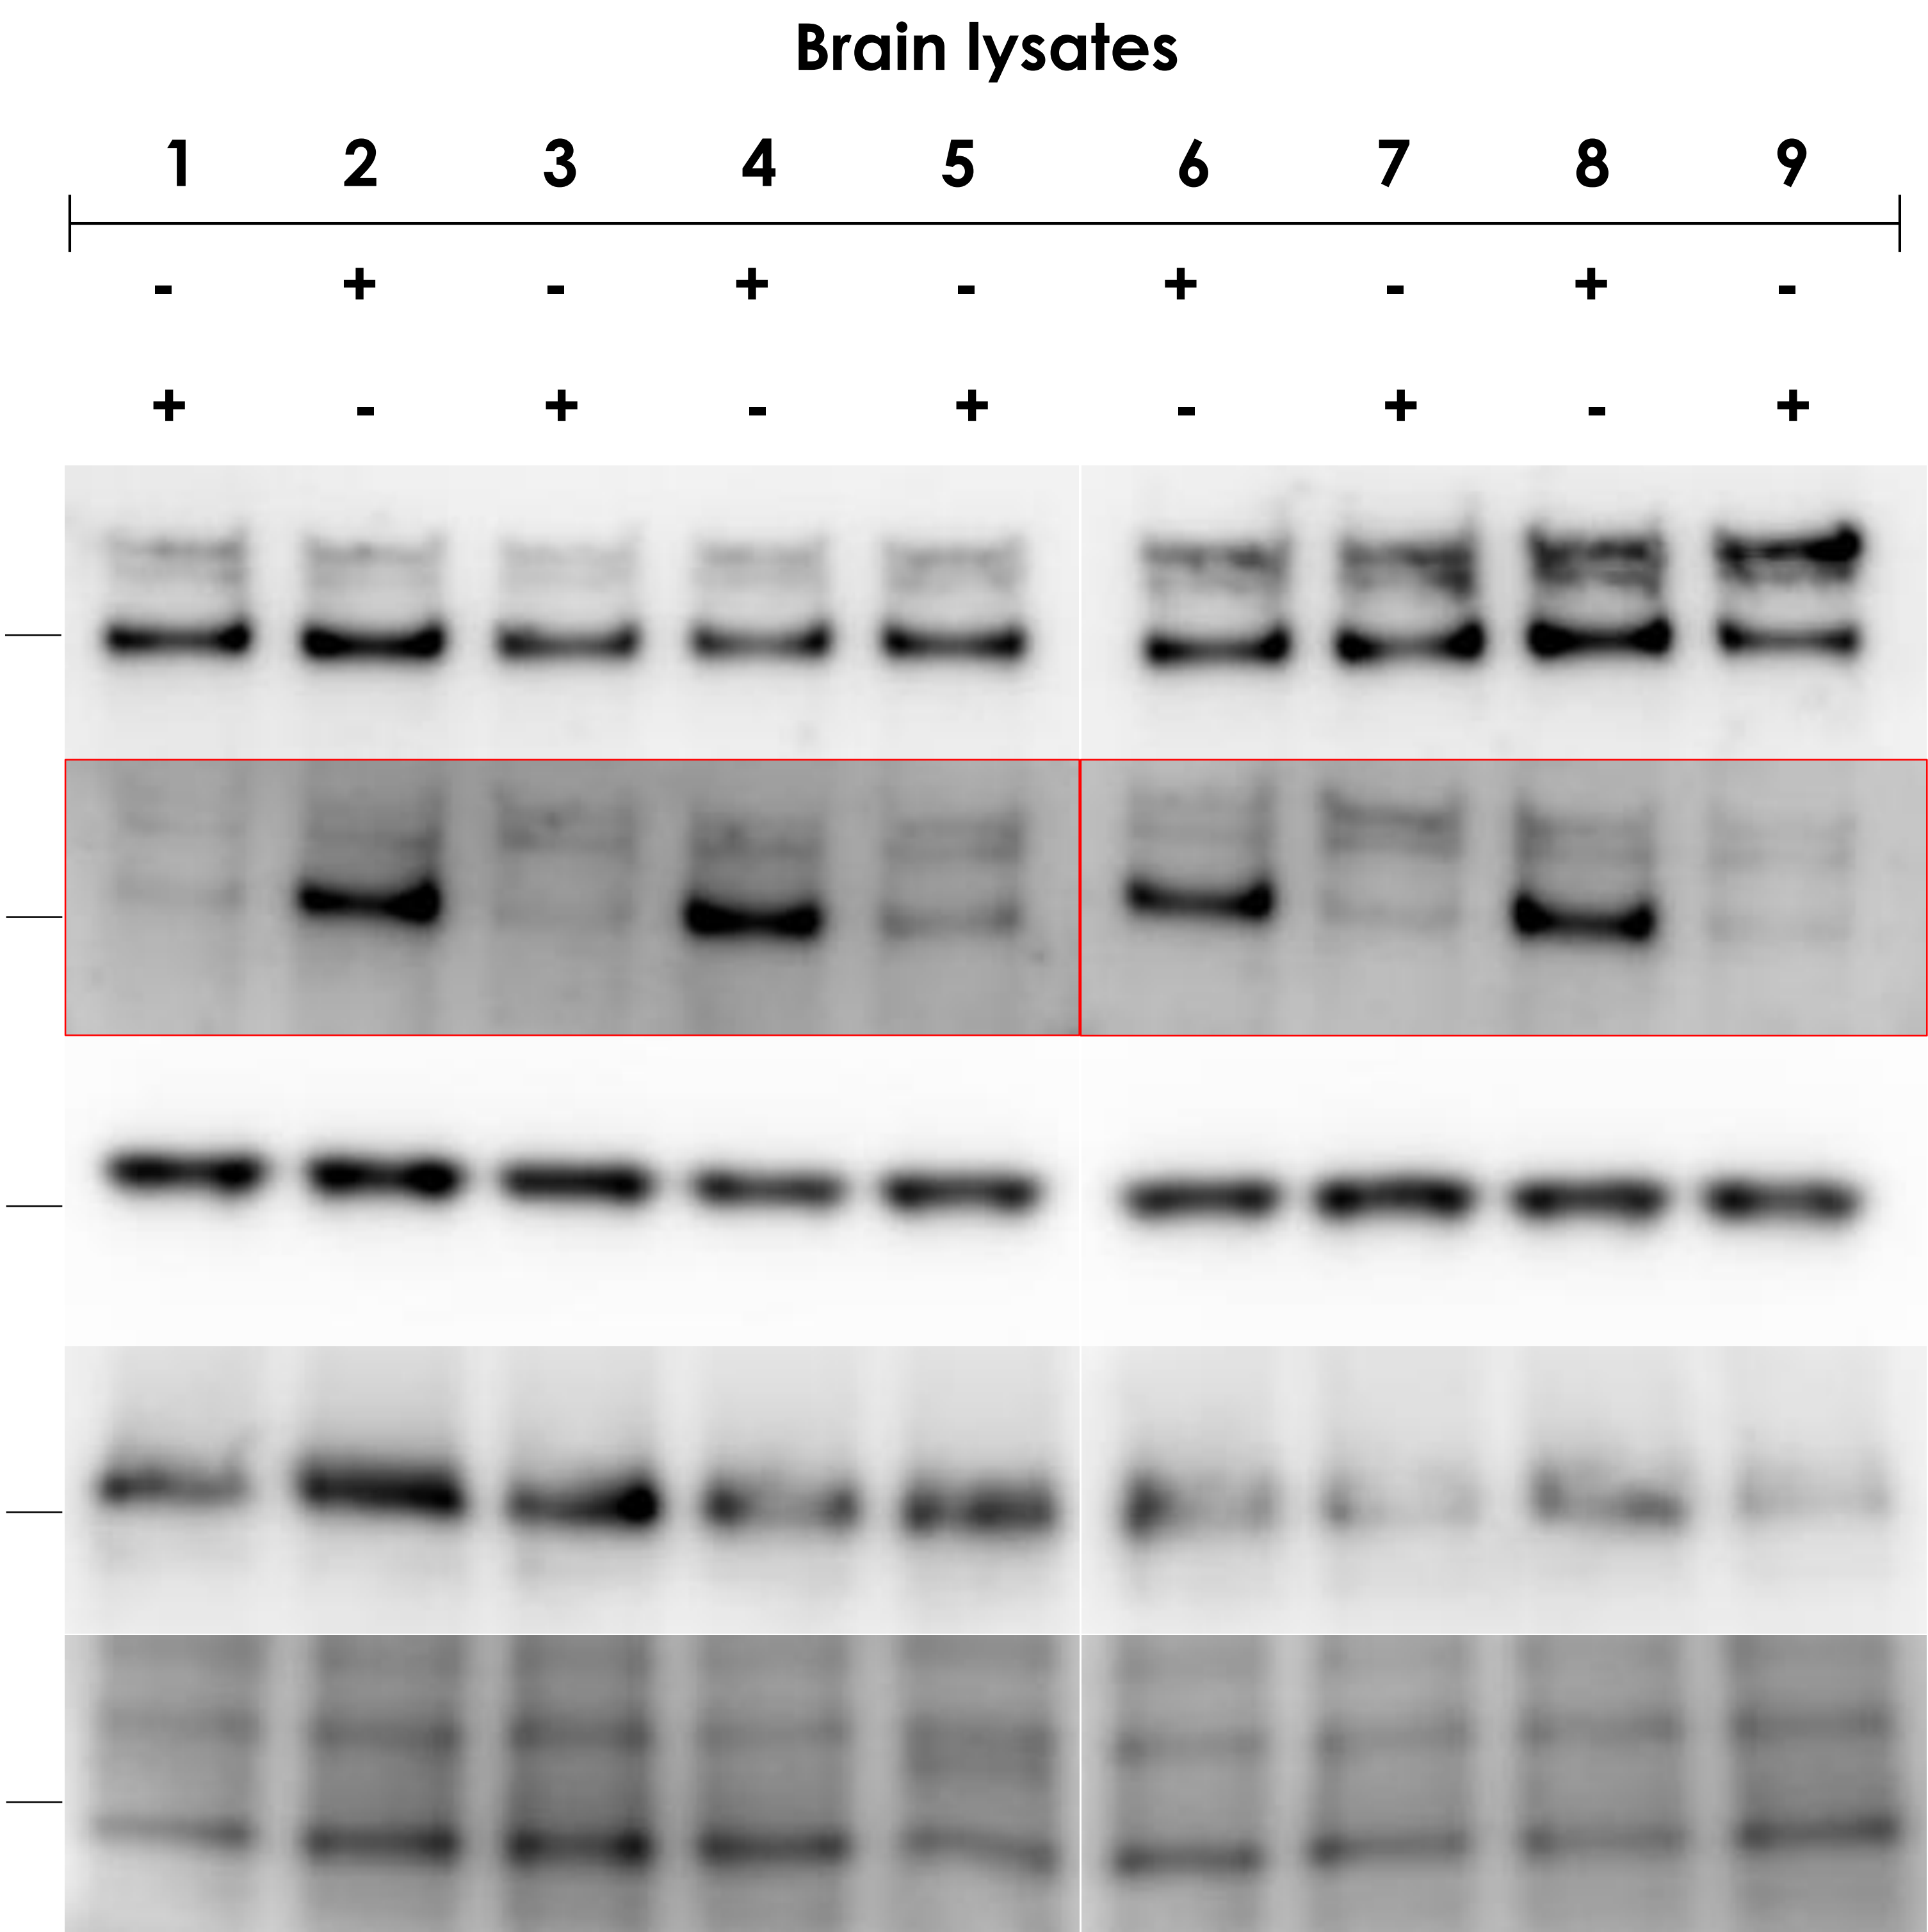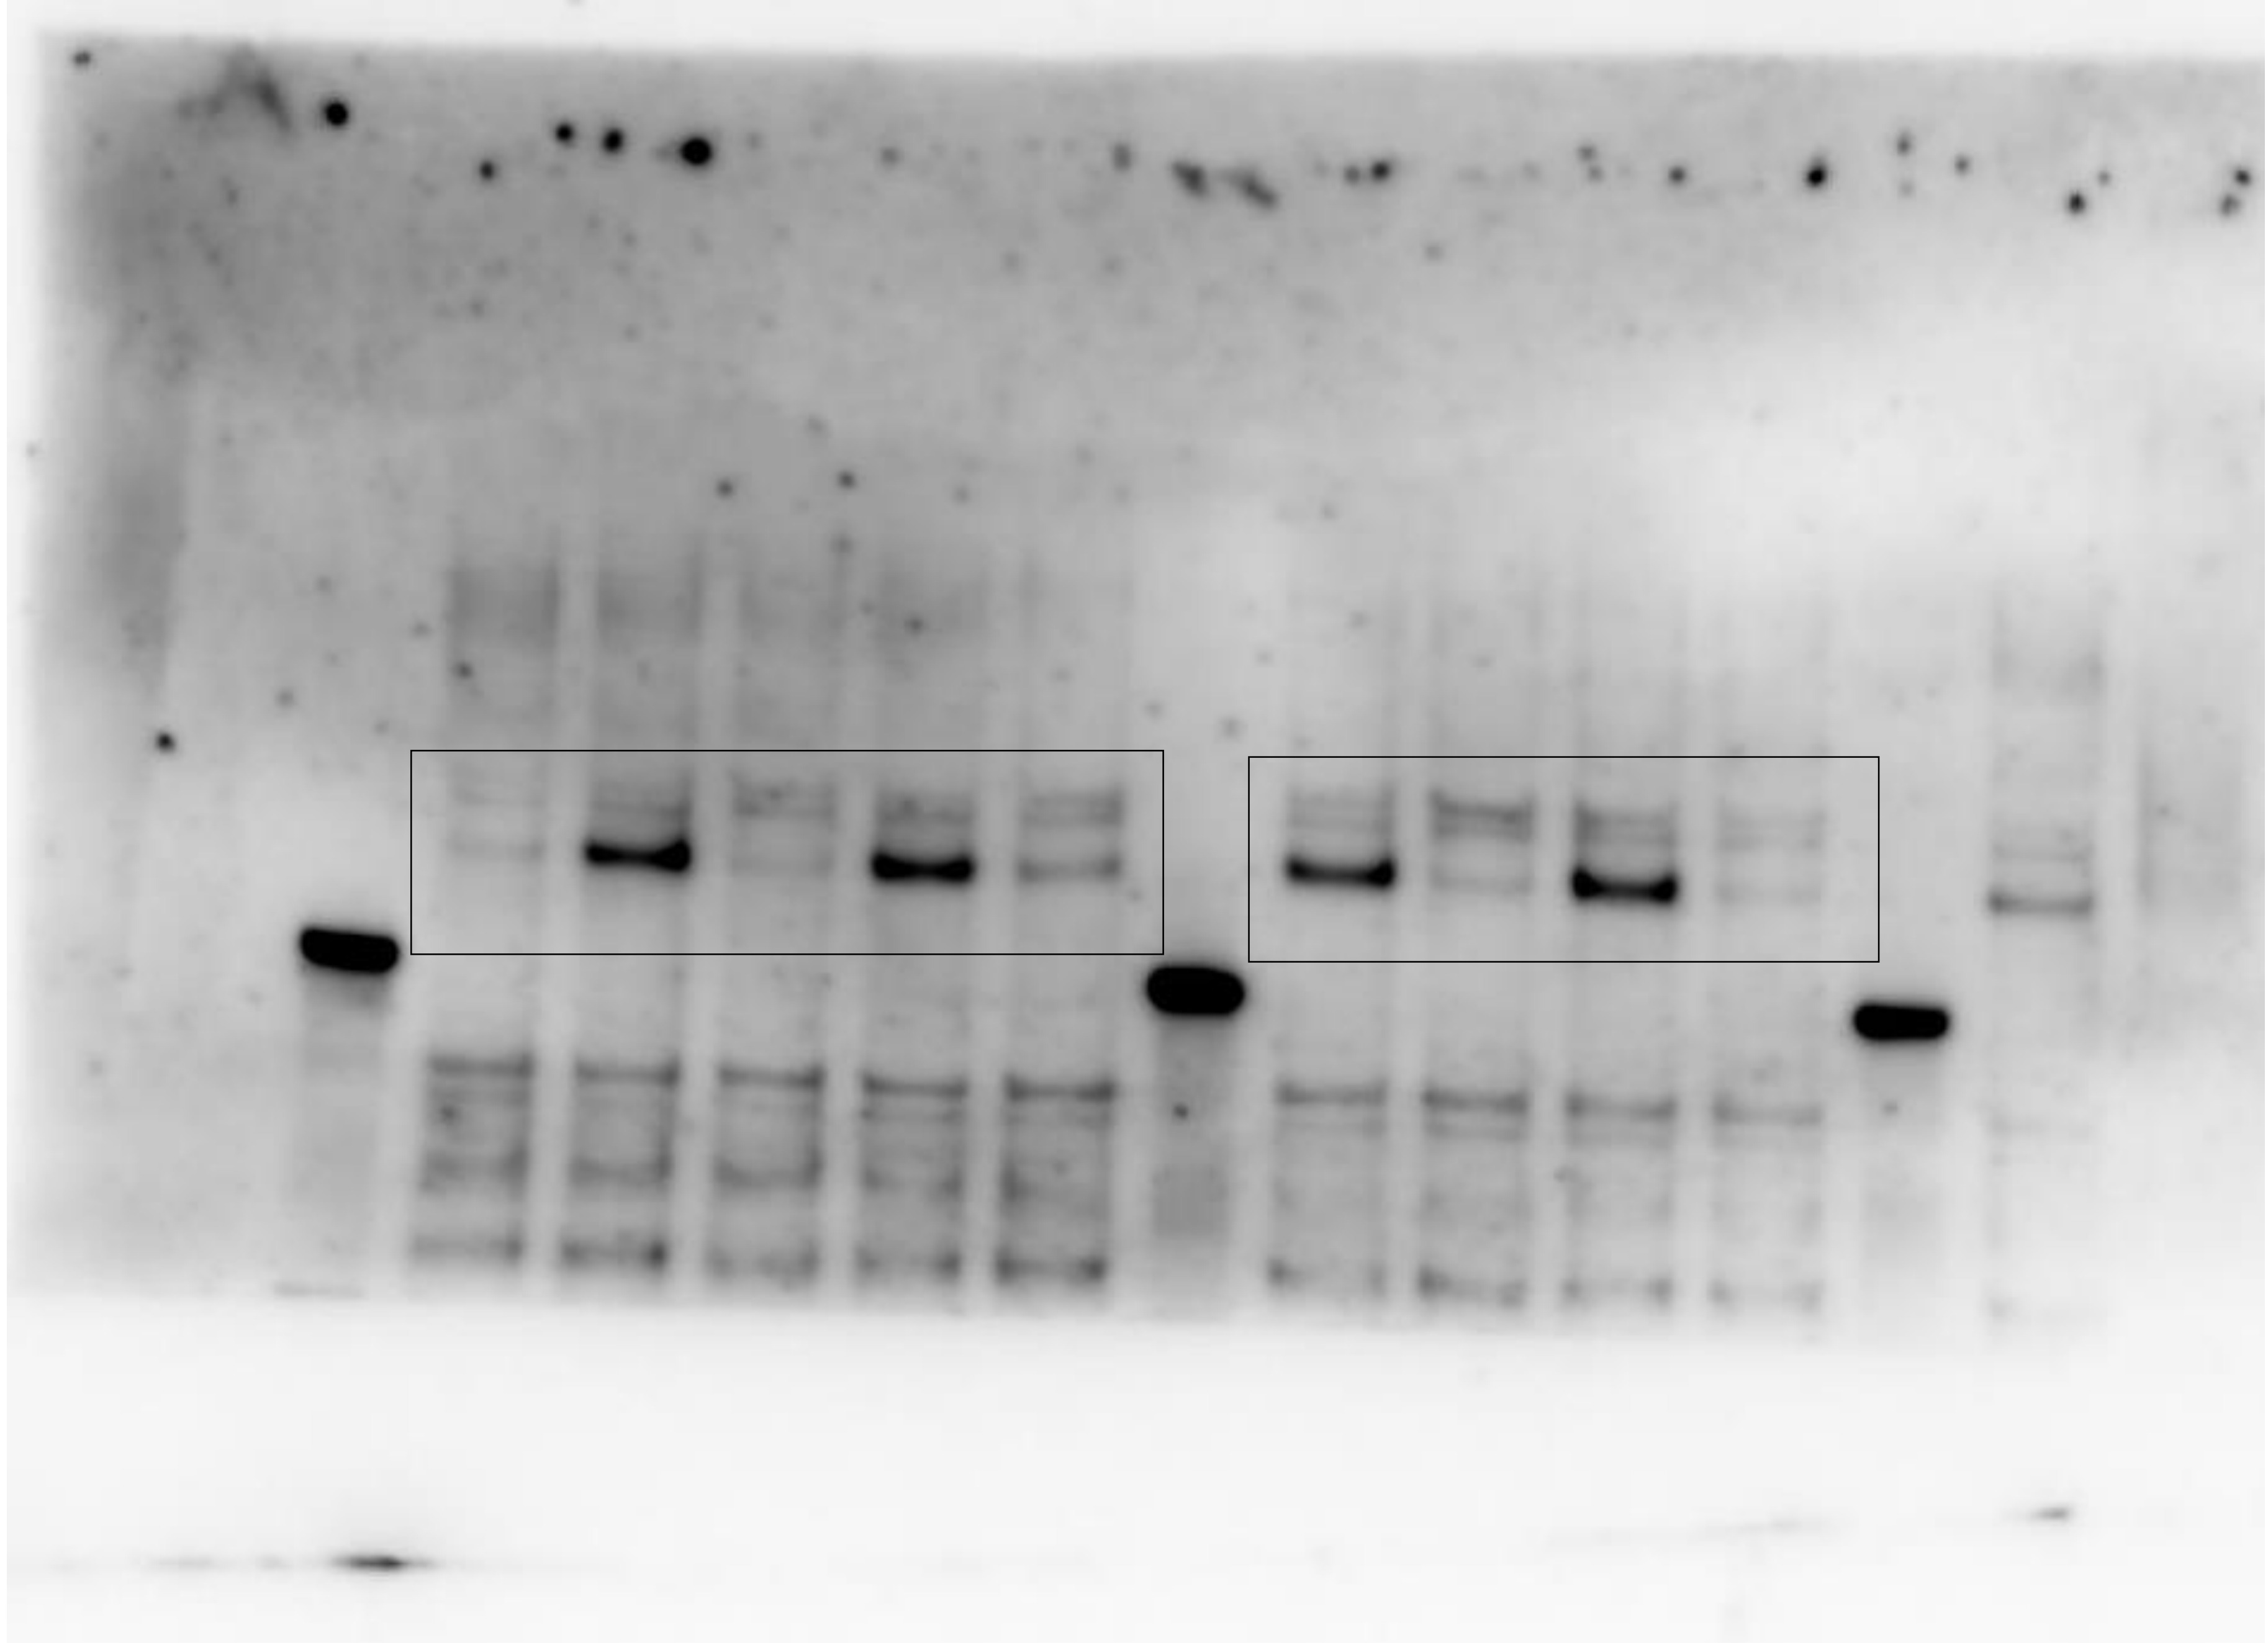

Figure 5a

Brain lysates

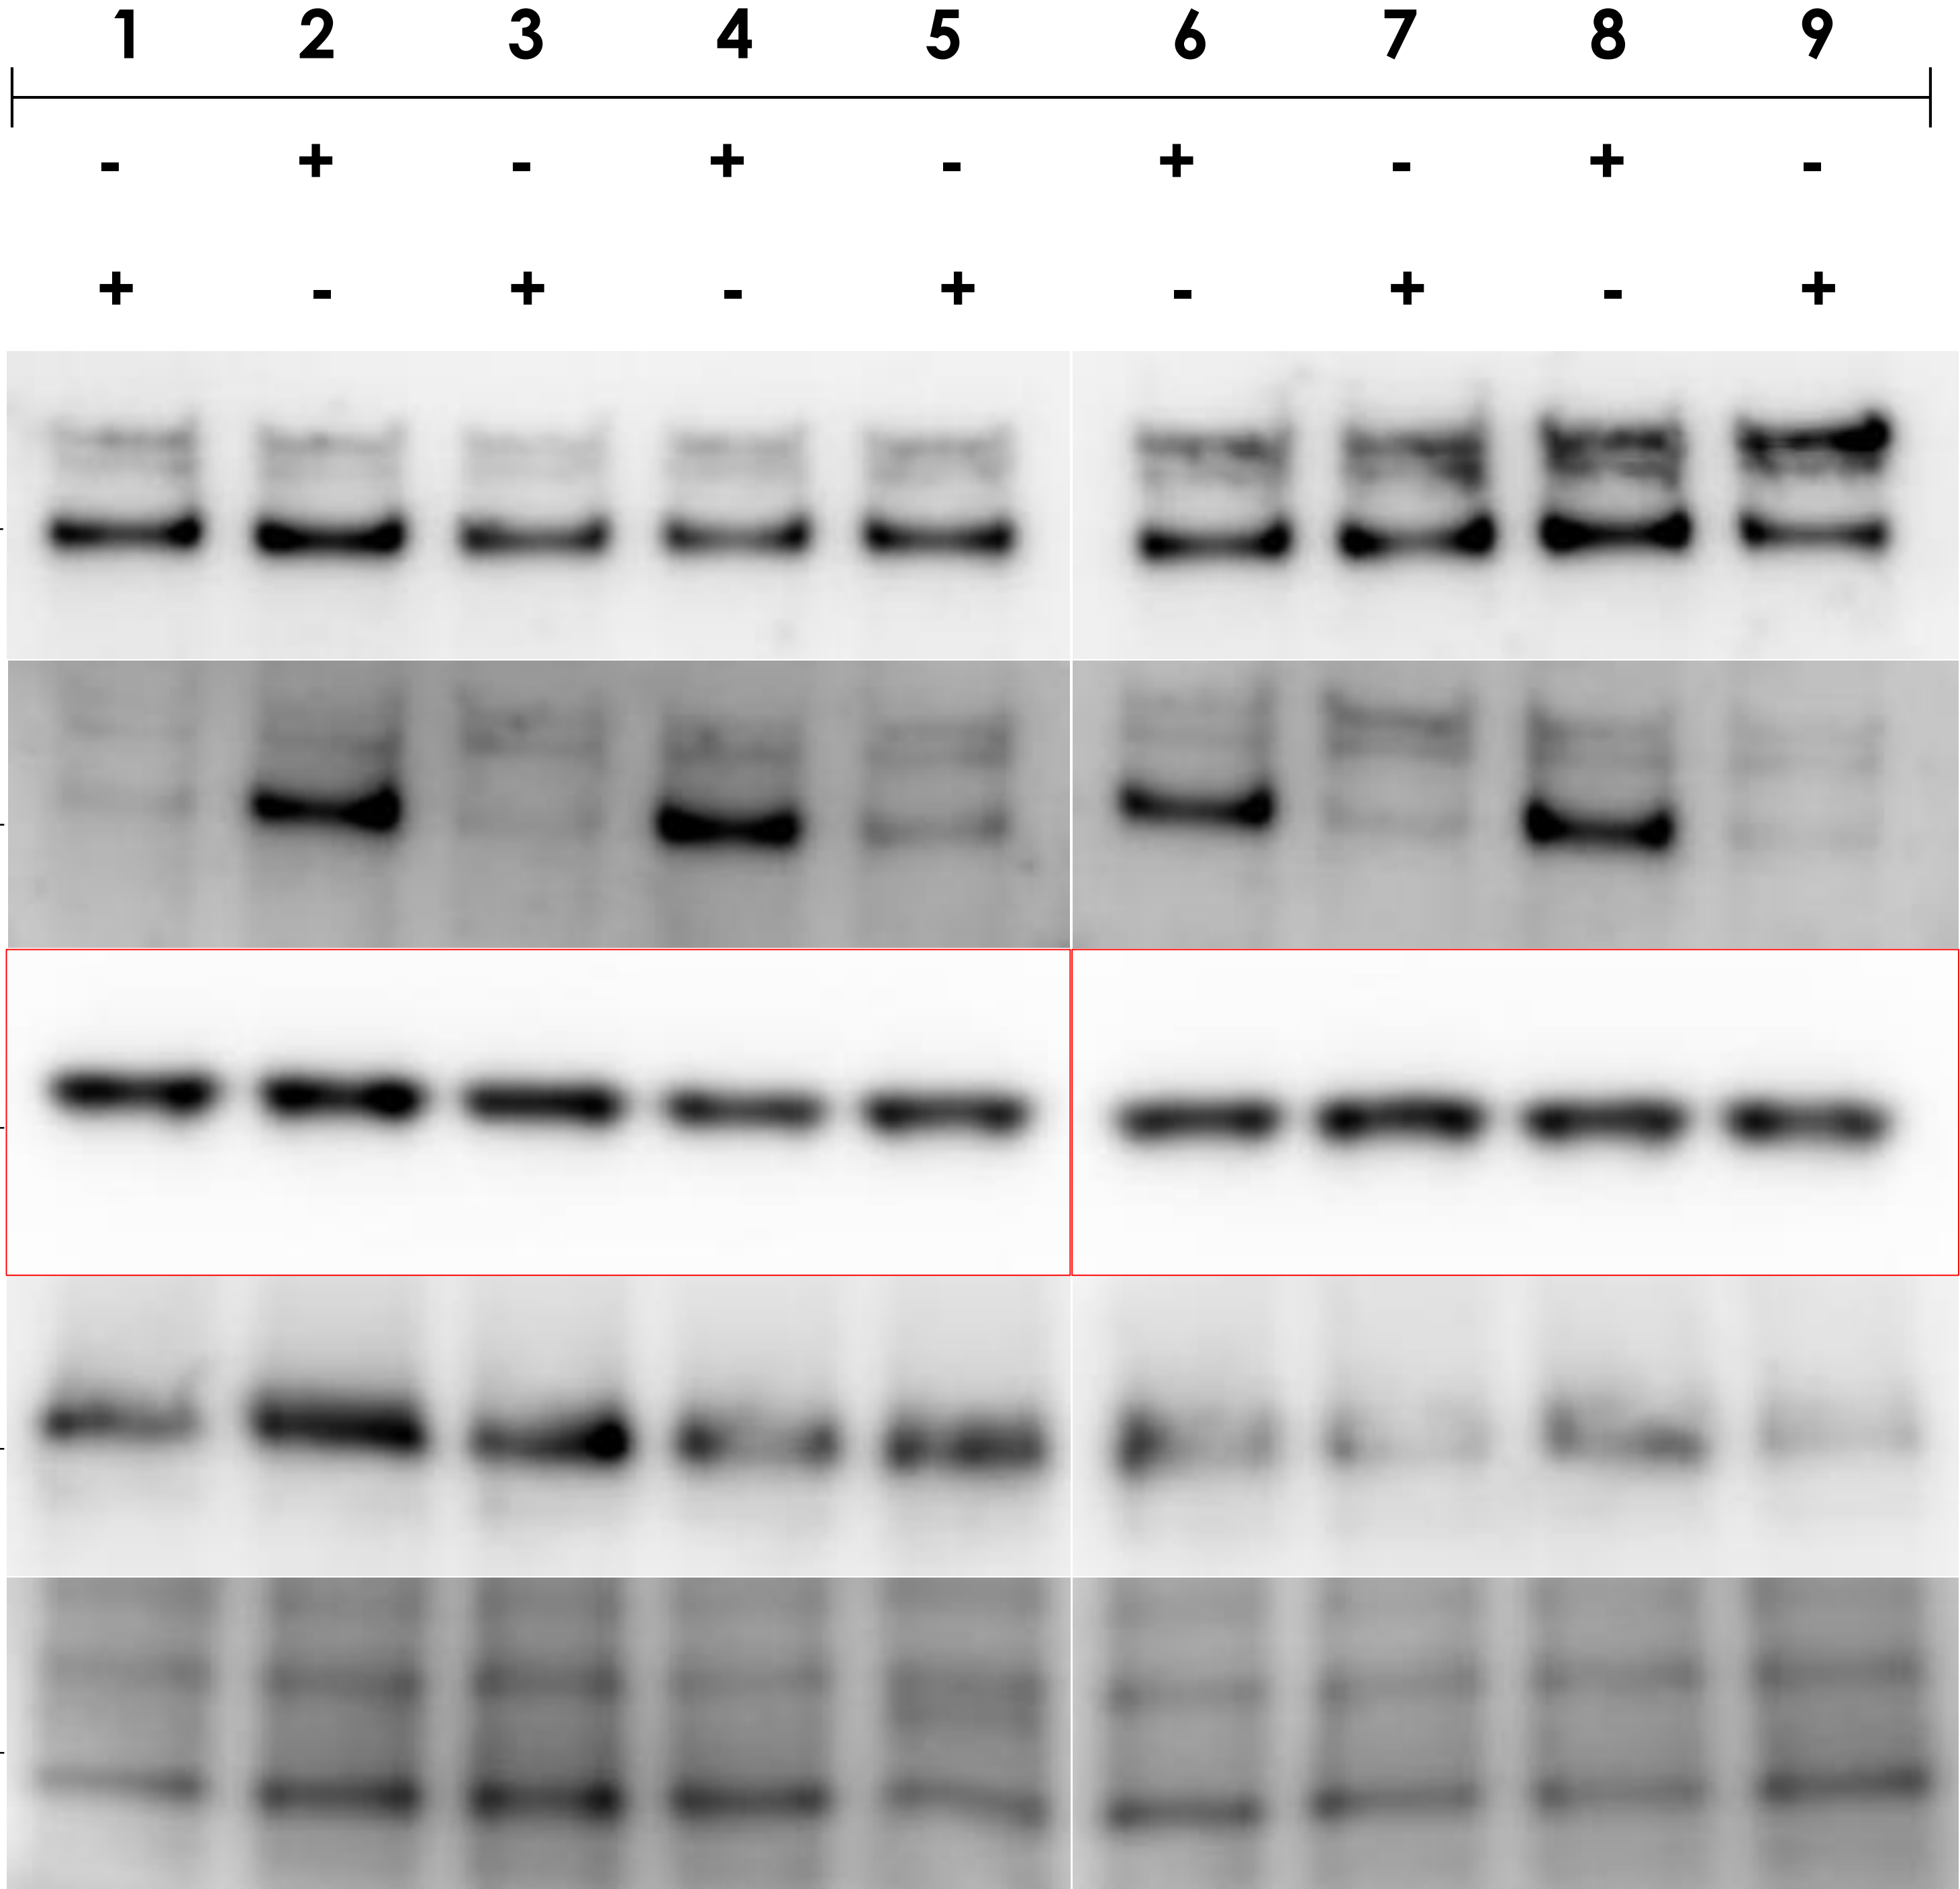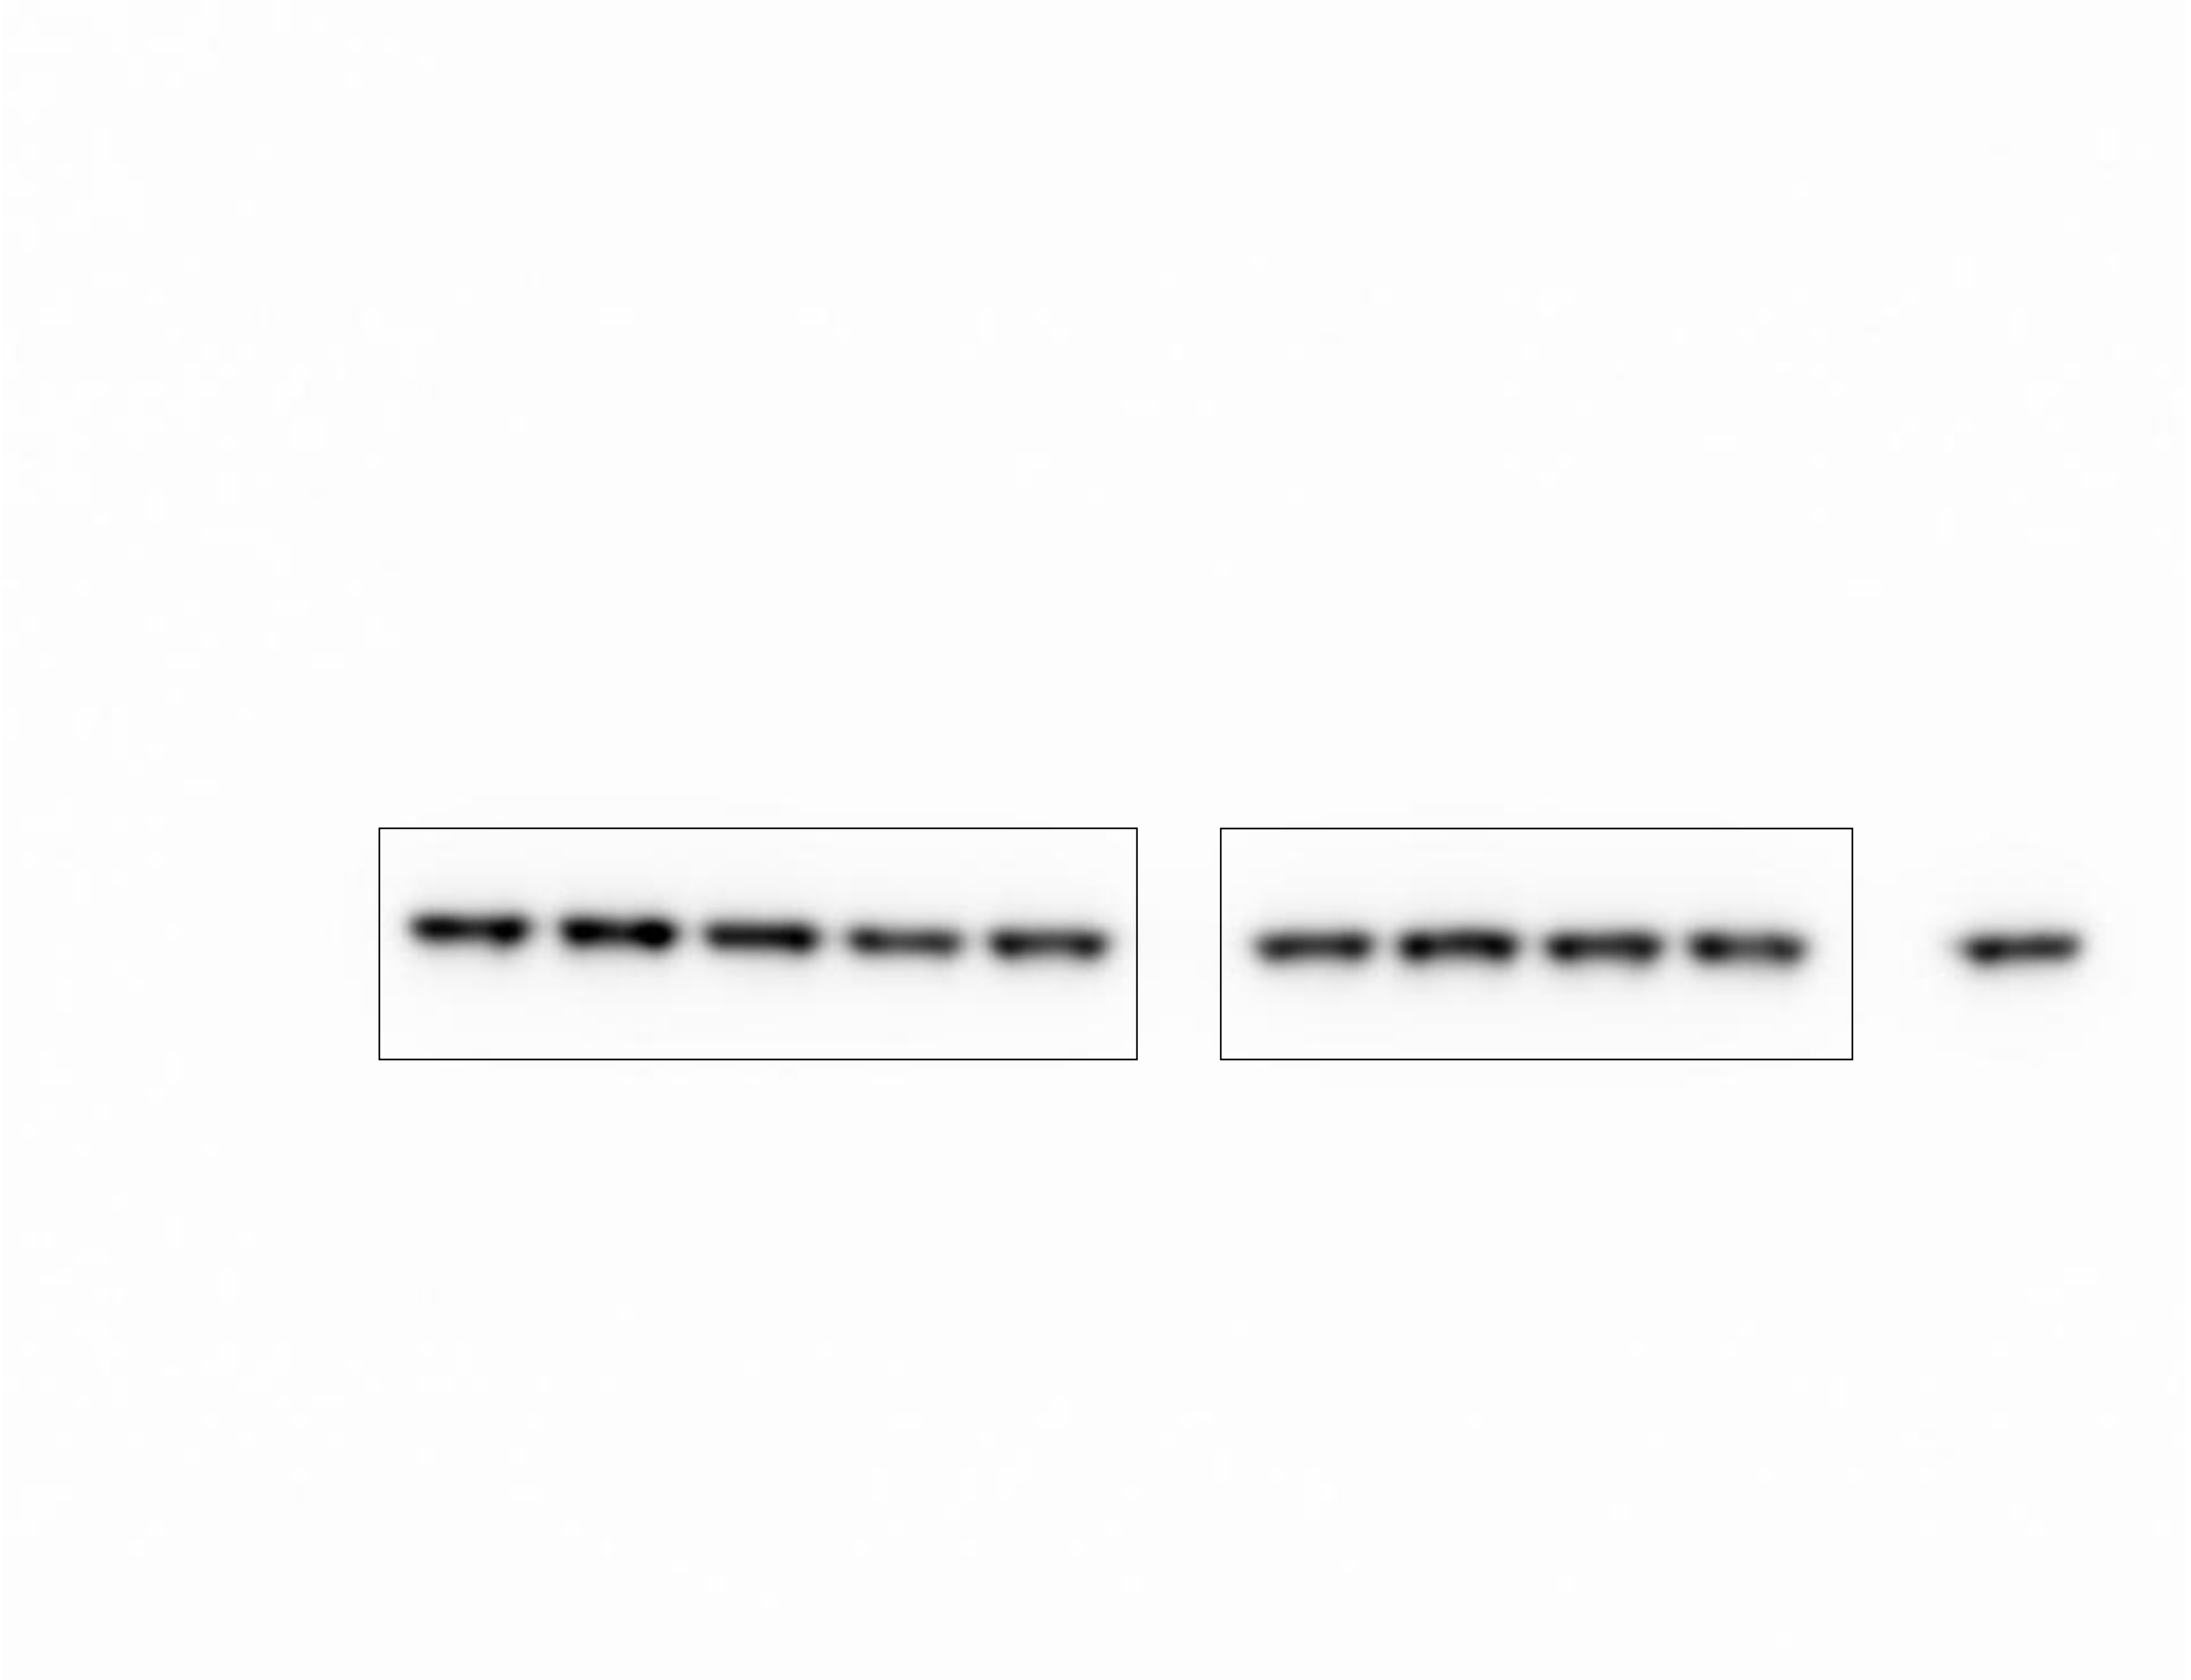

Figure 5a

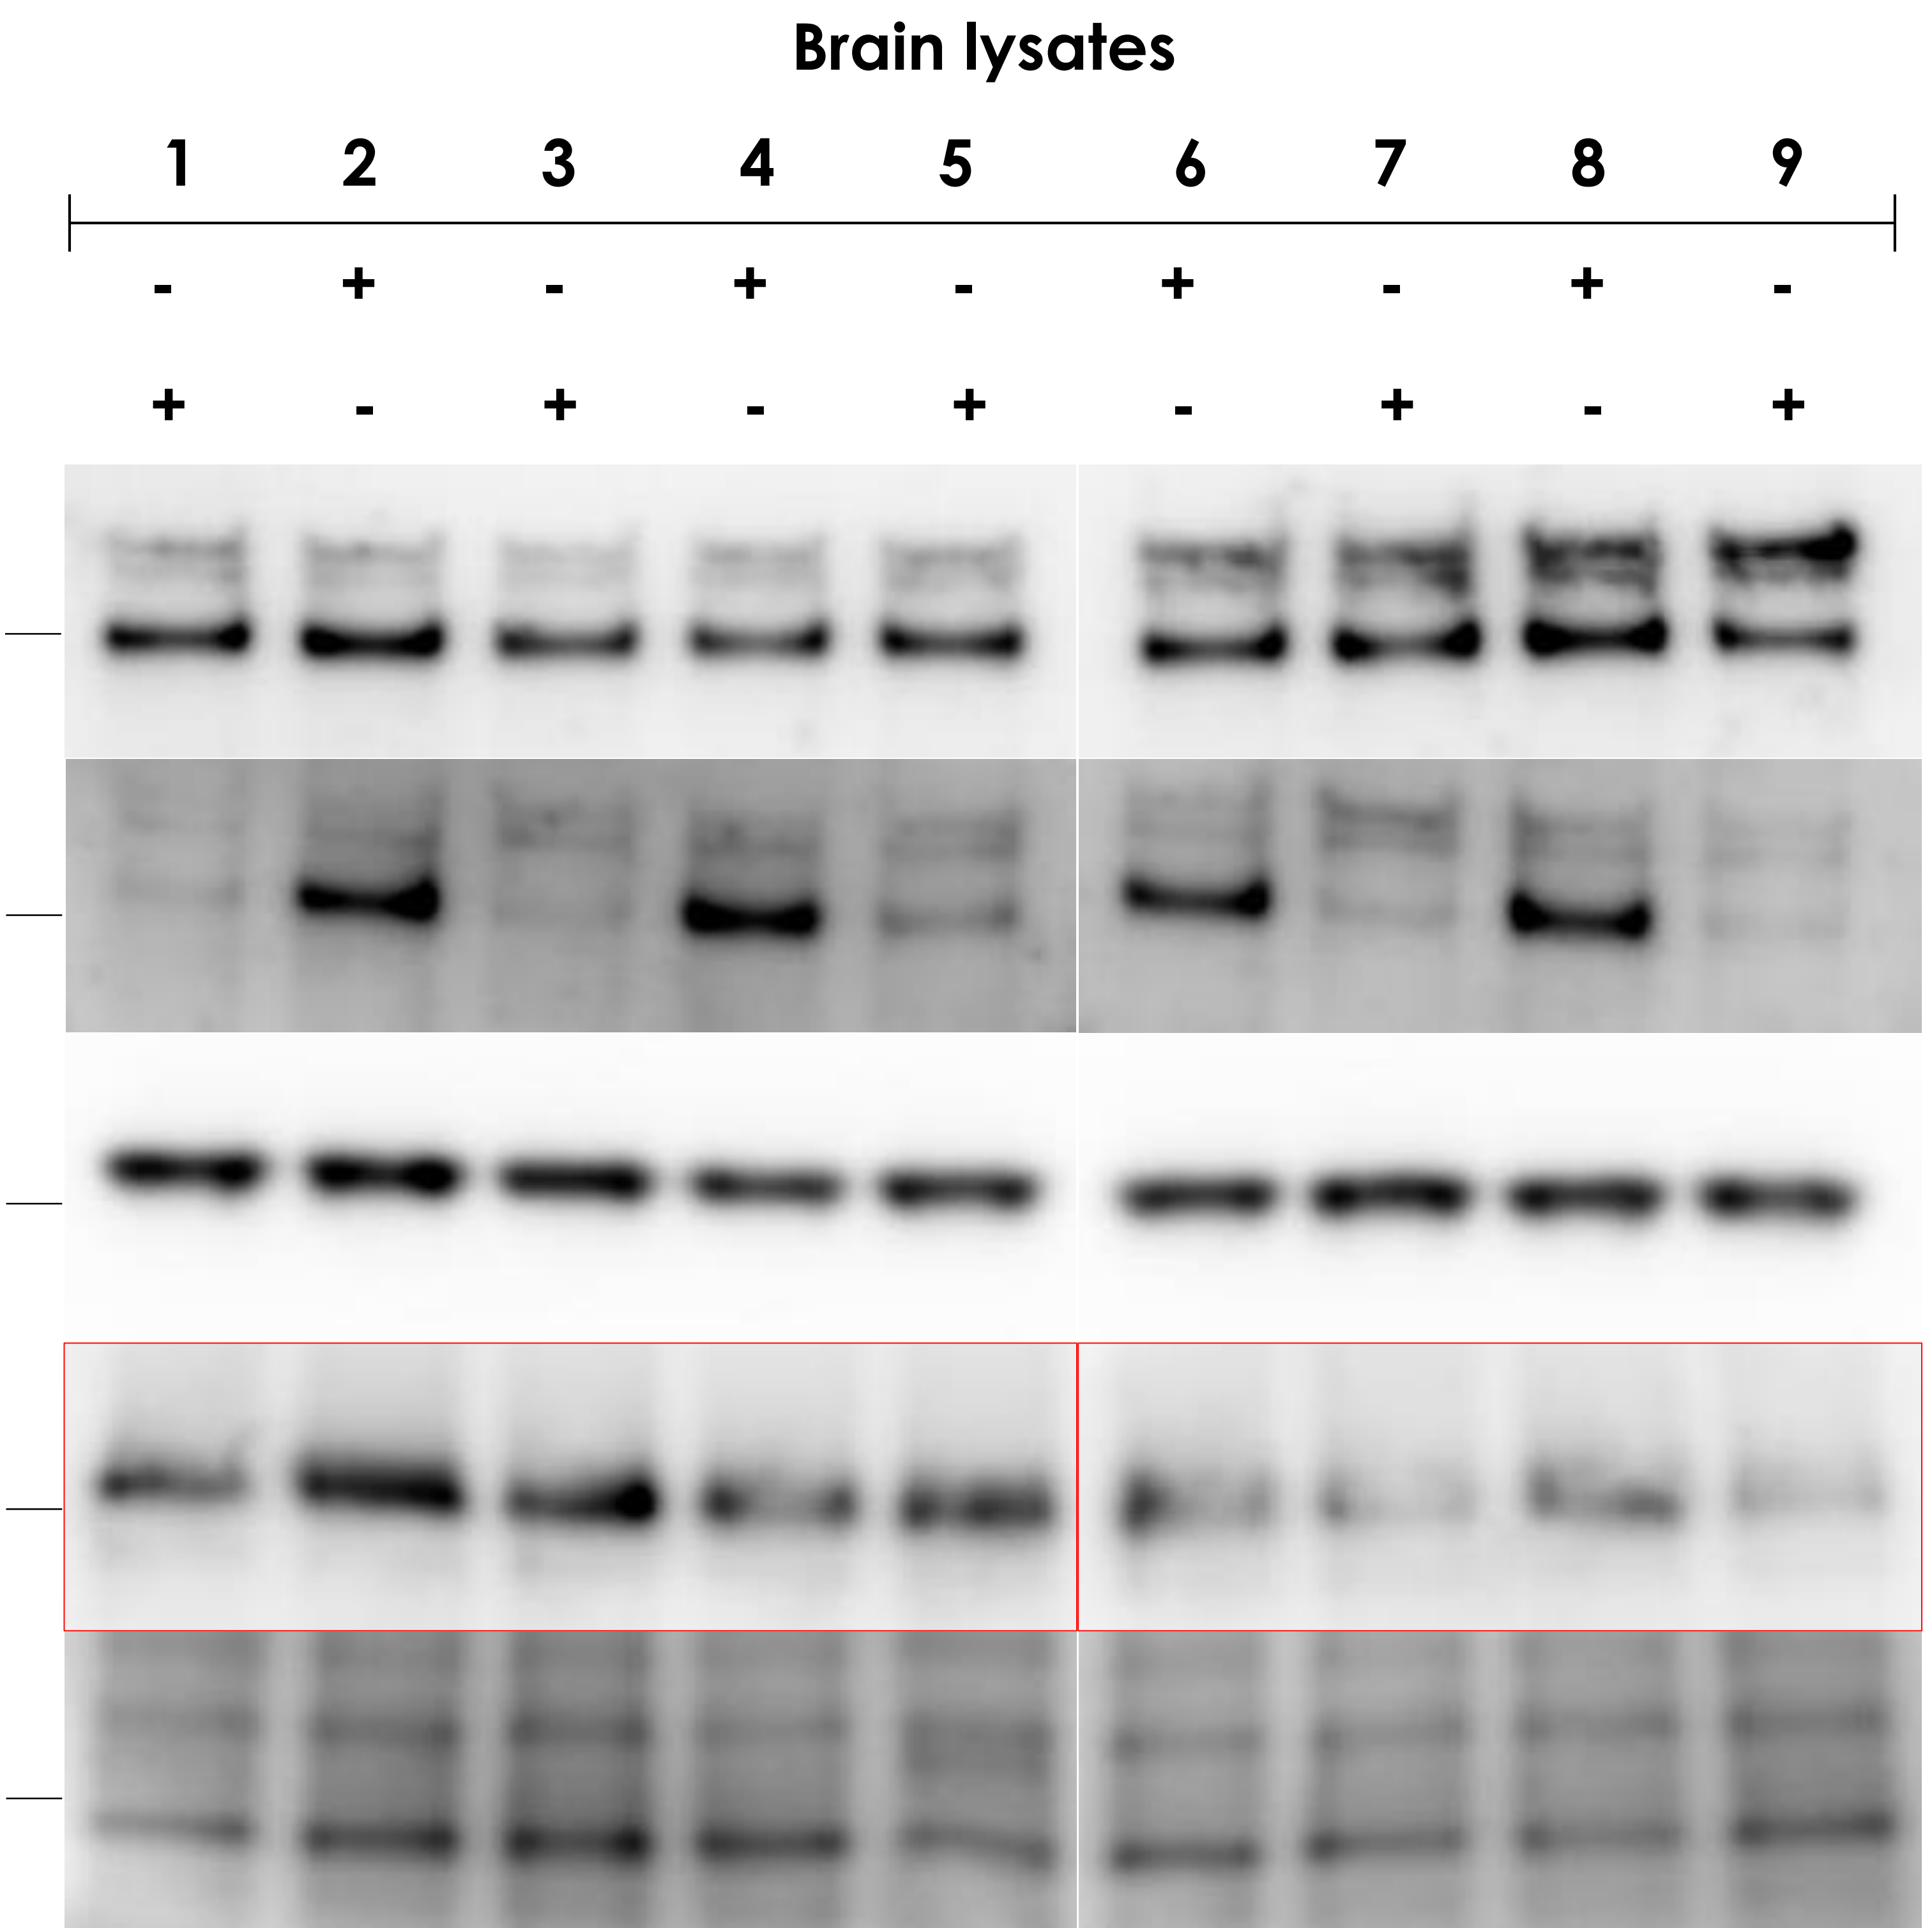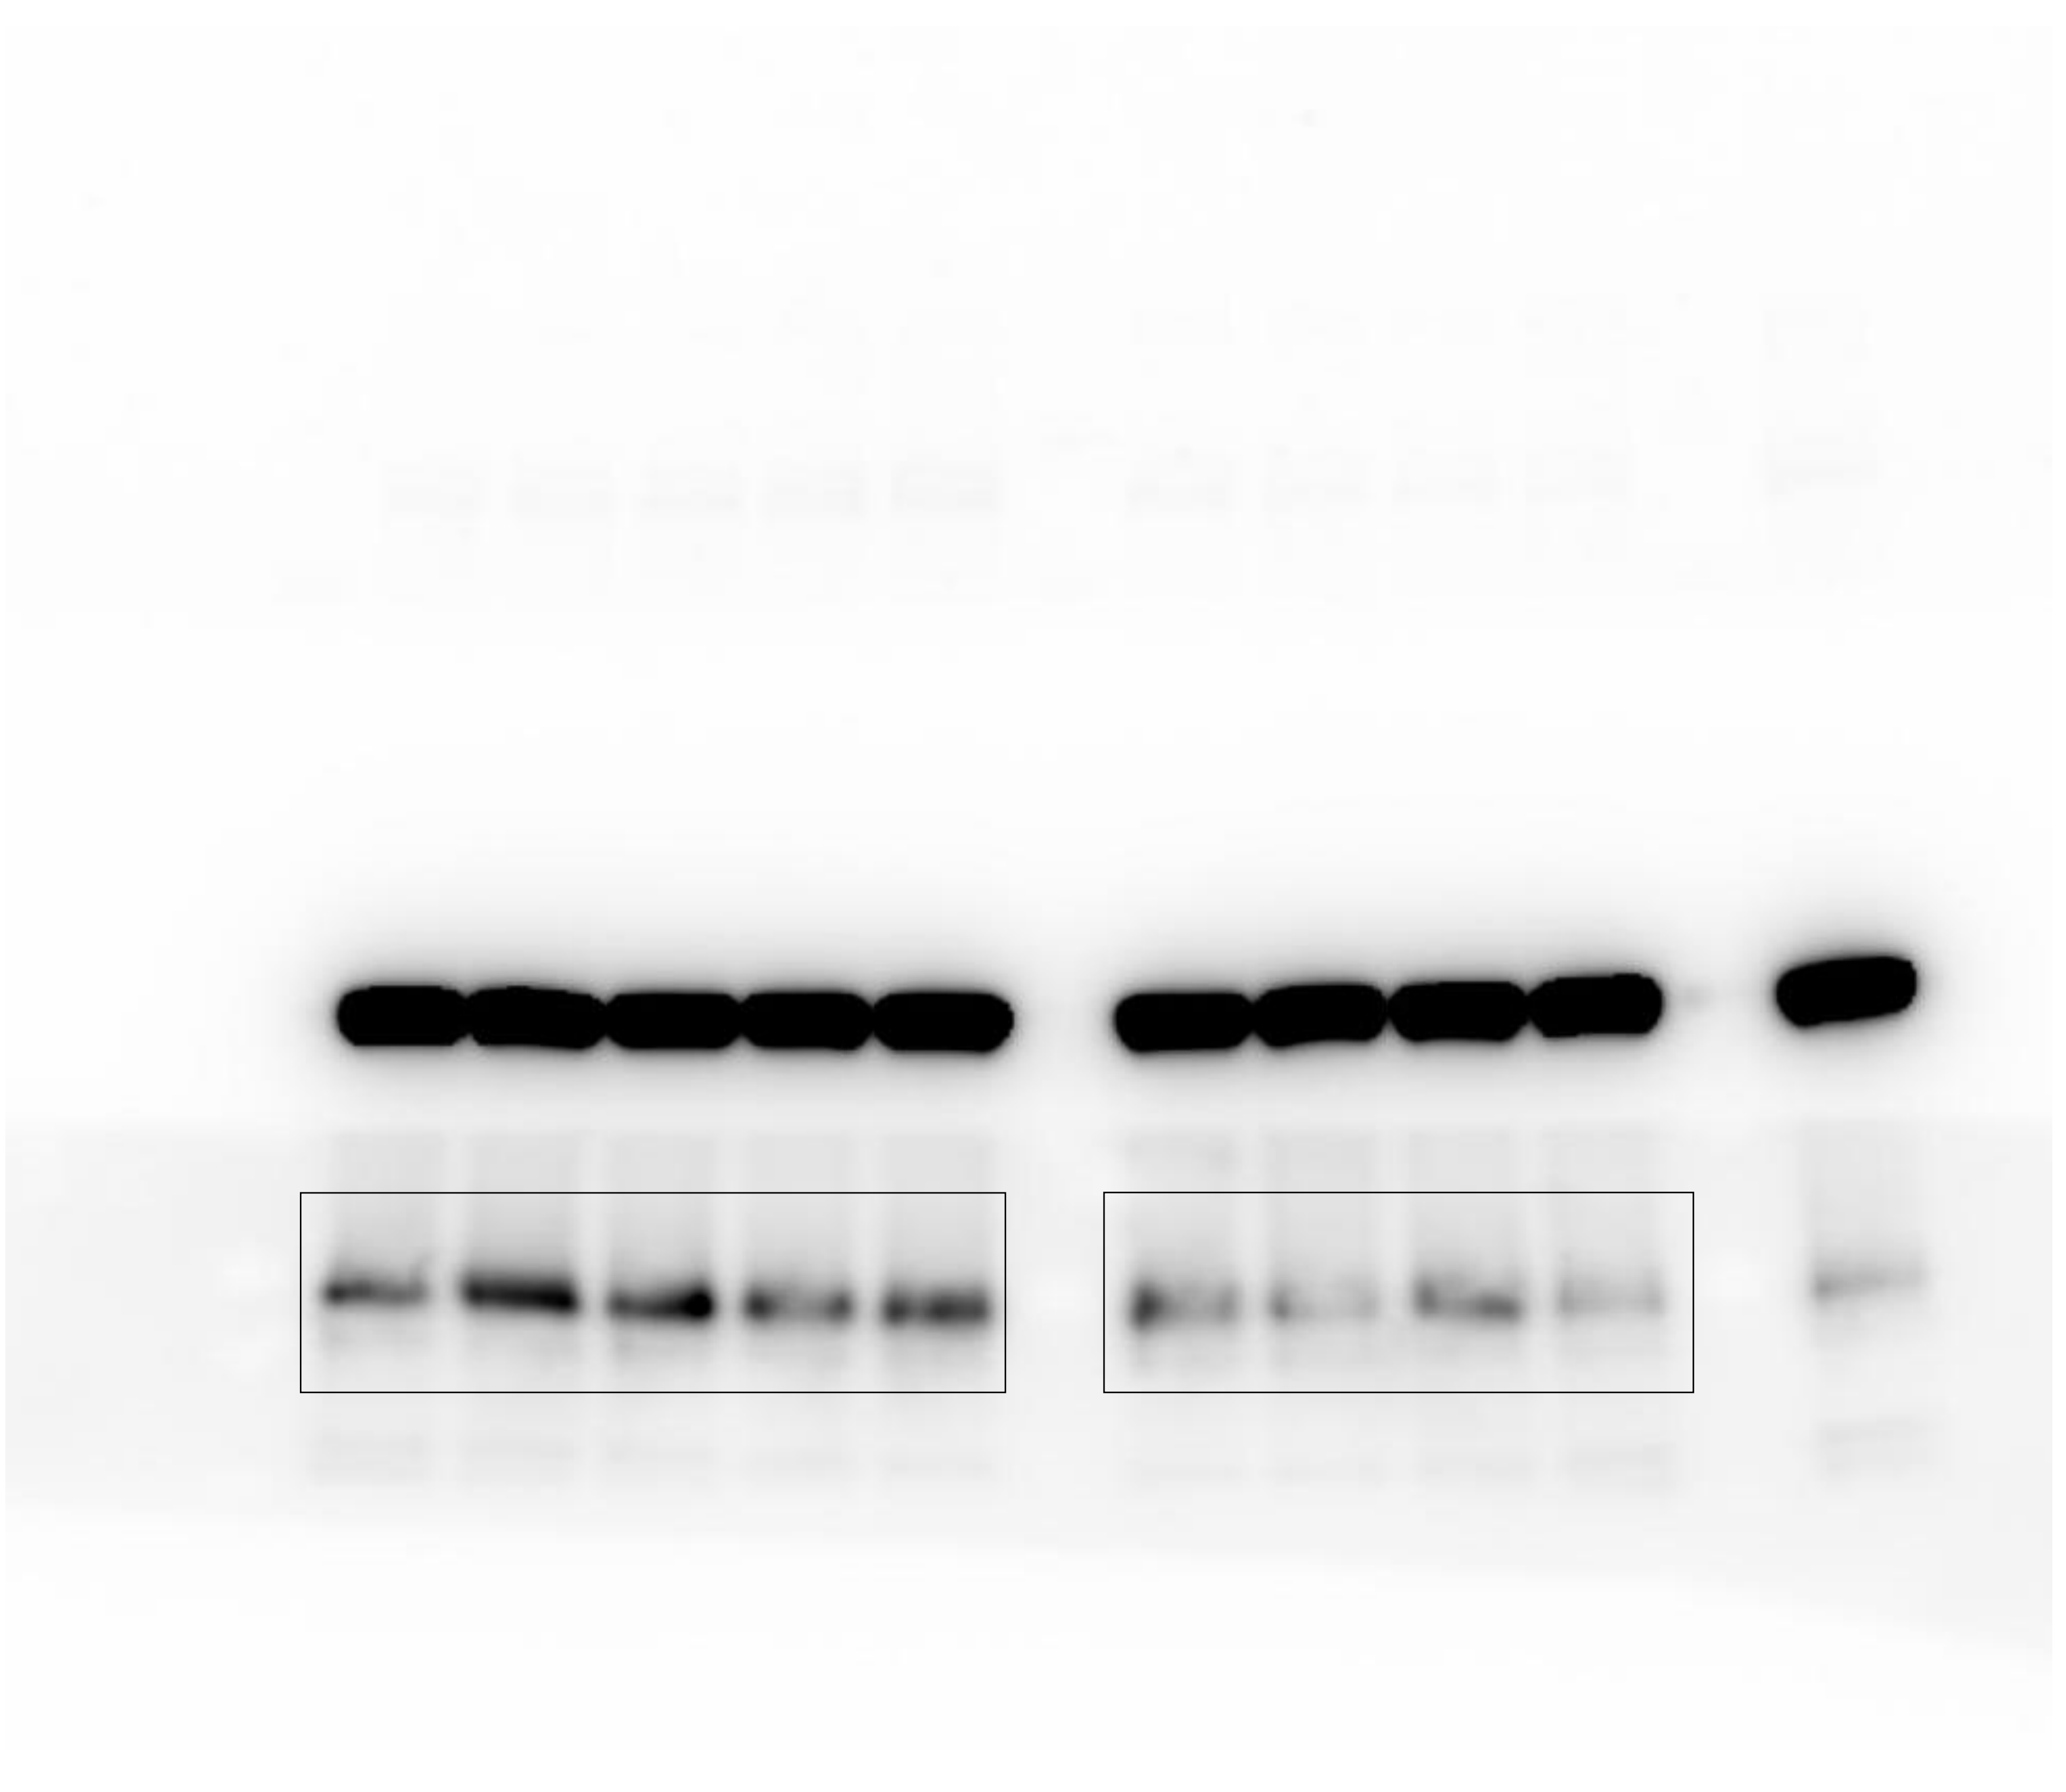

Figure 5a

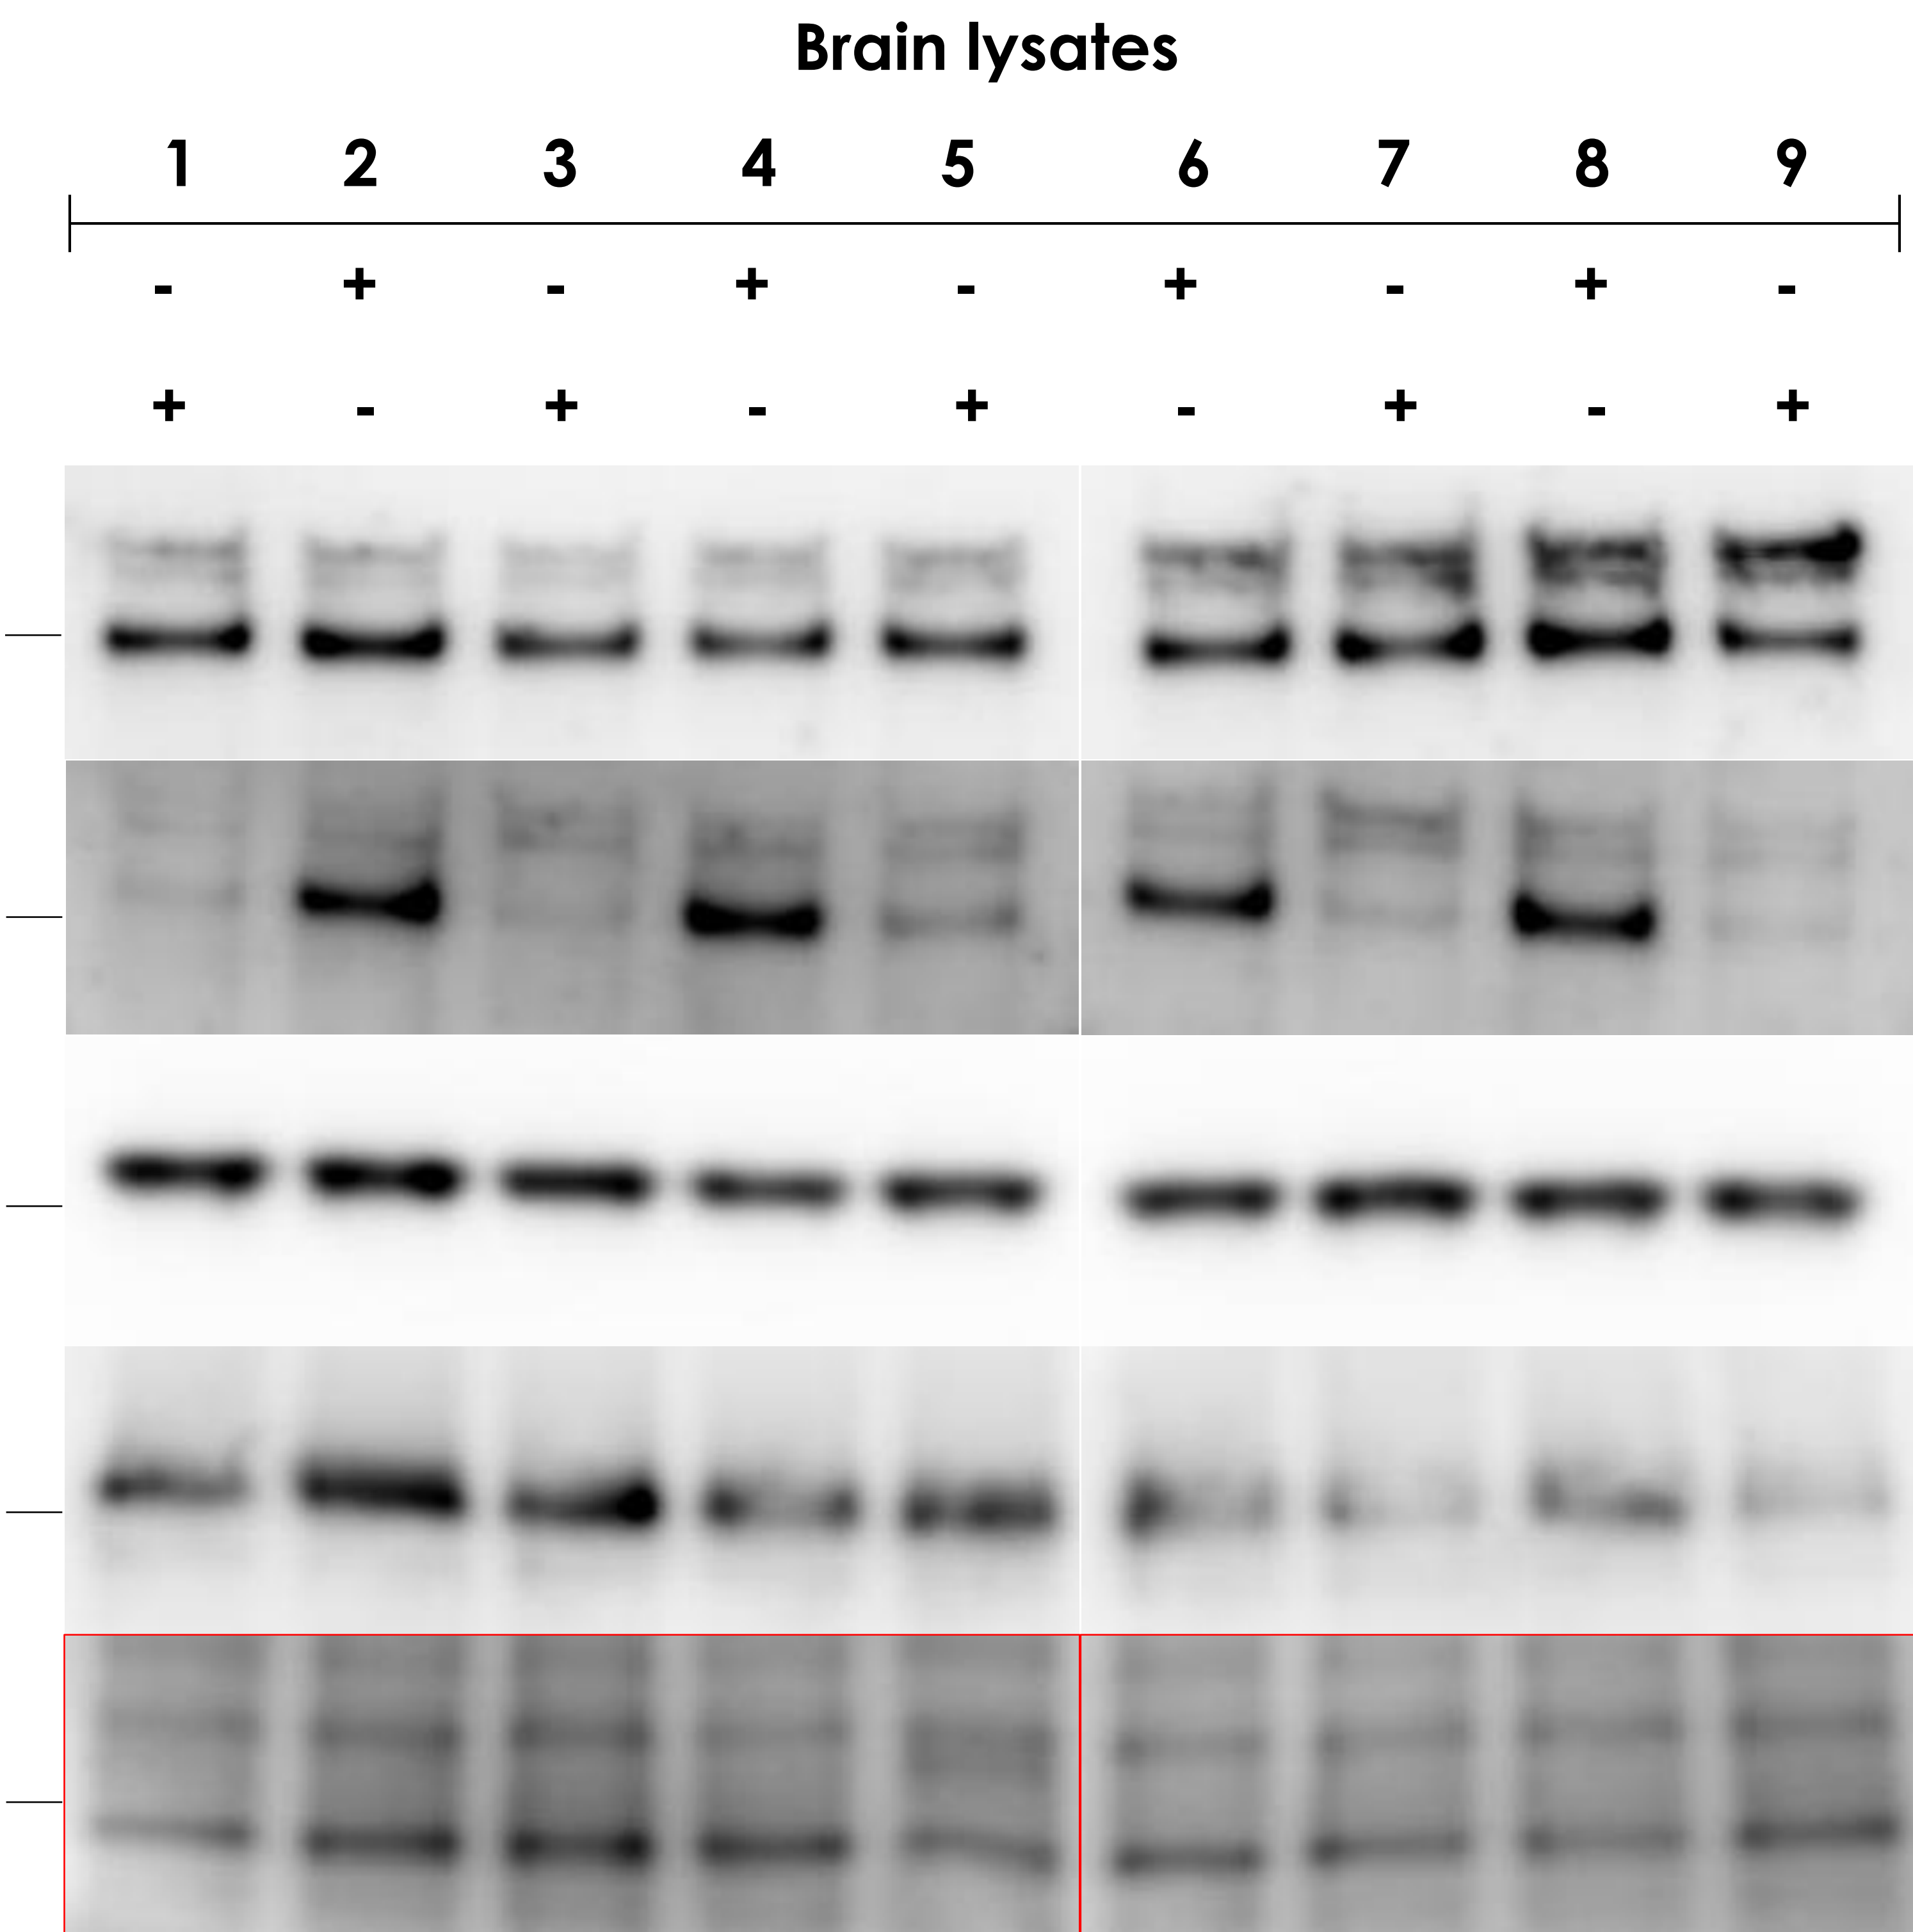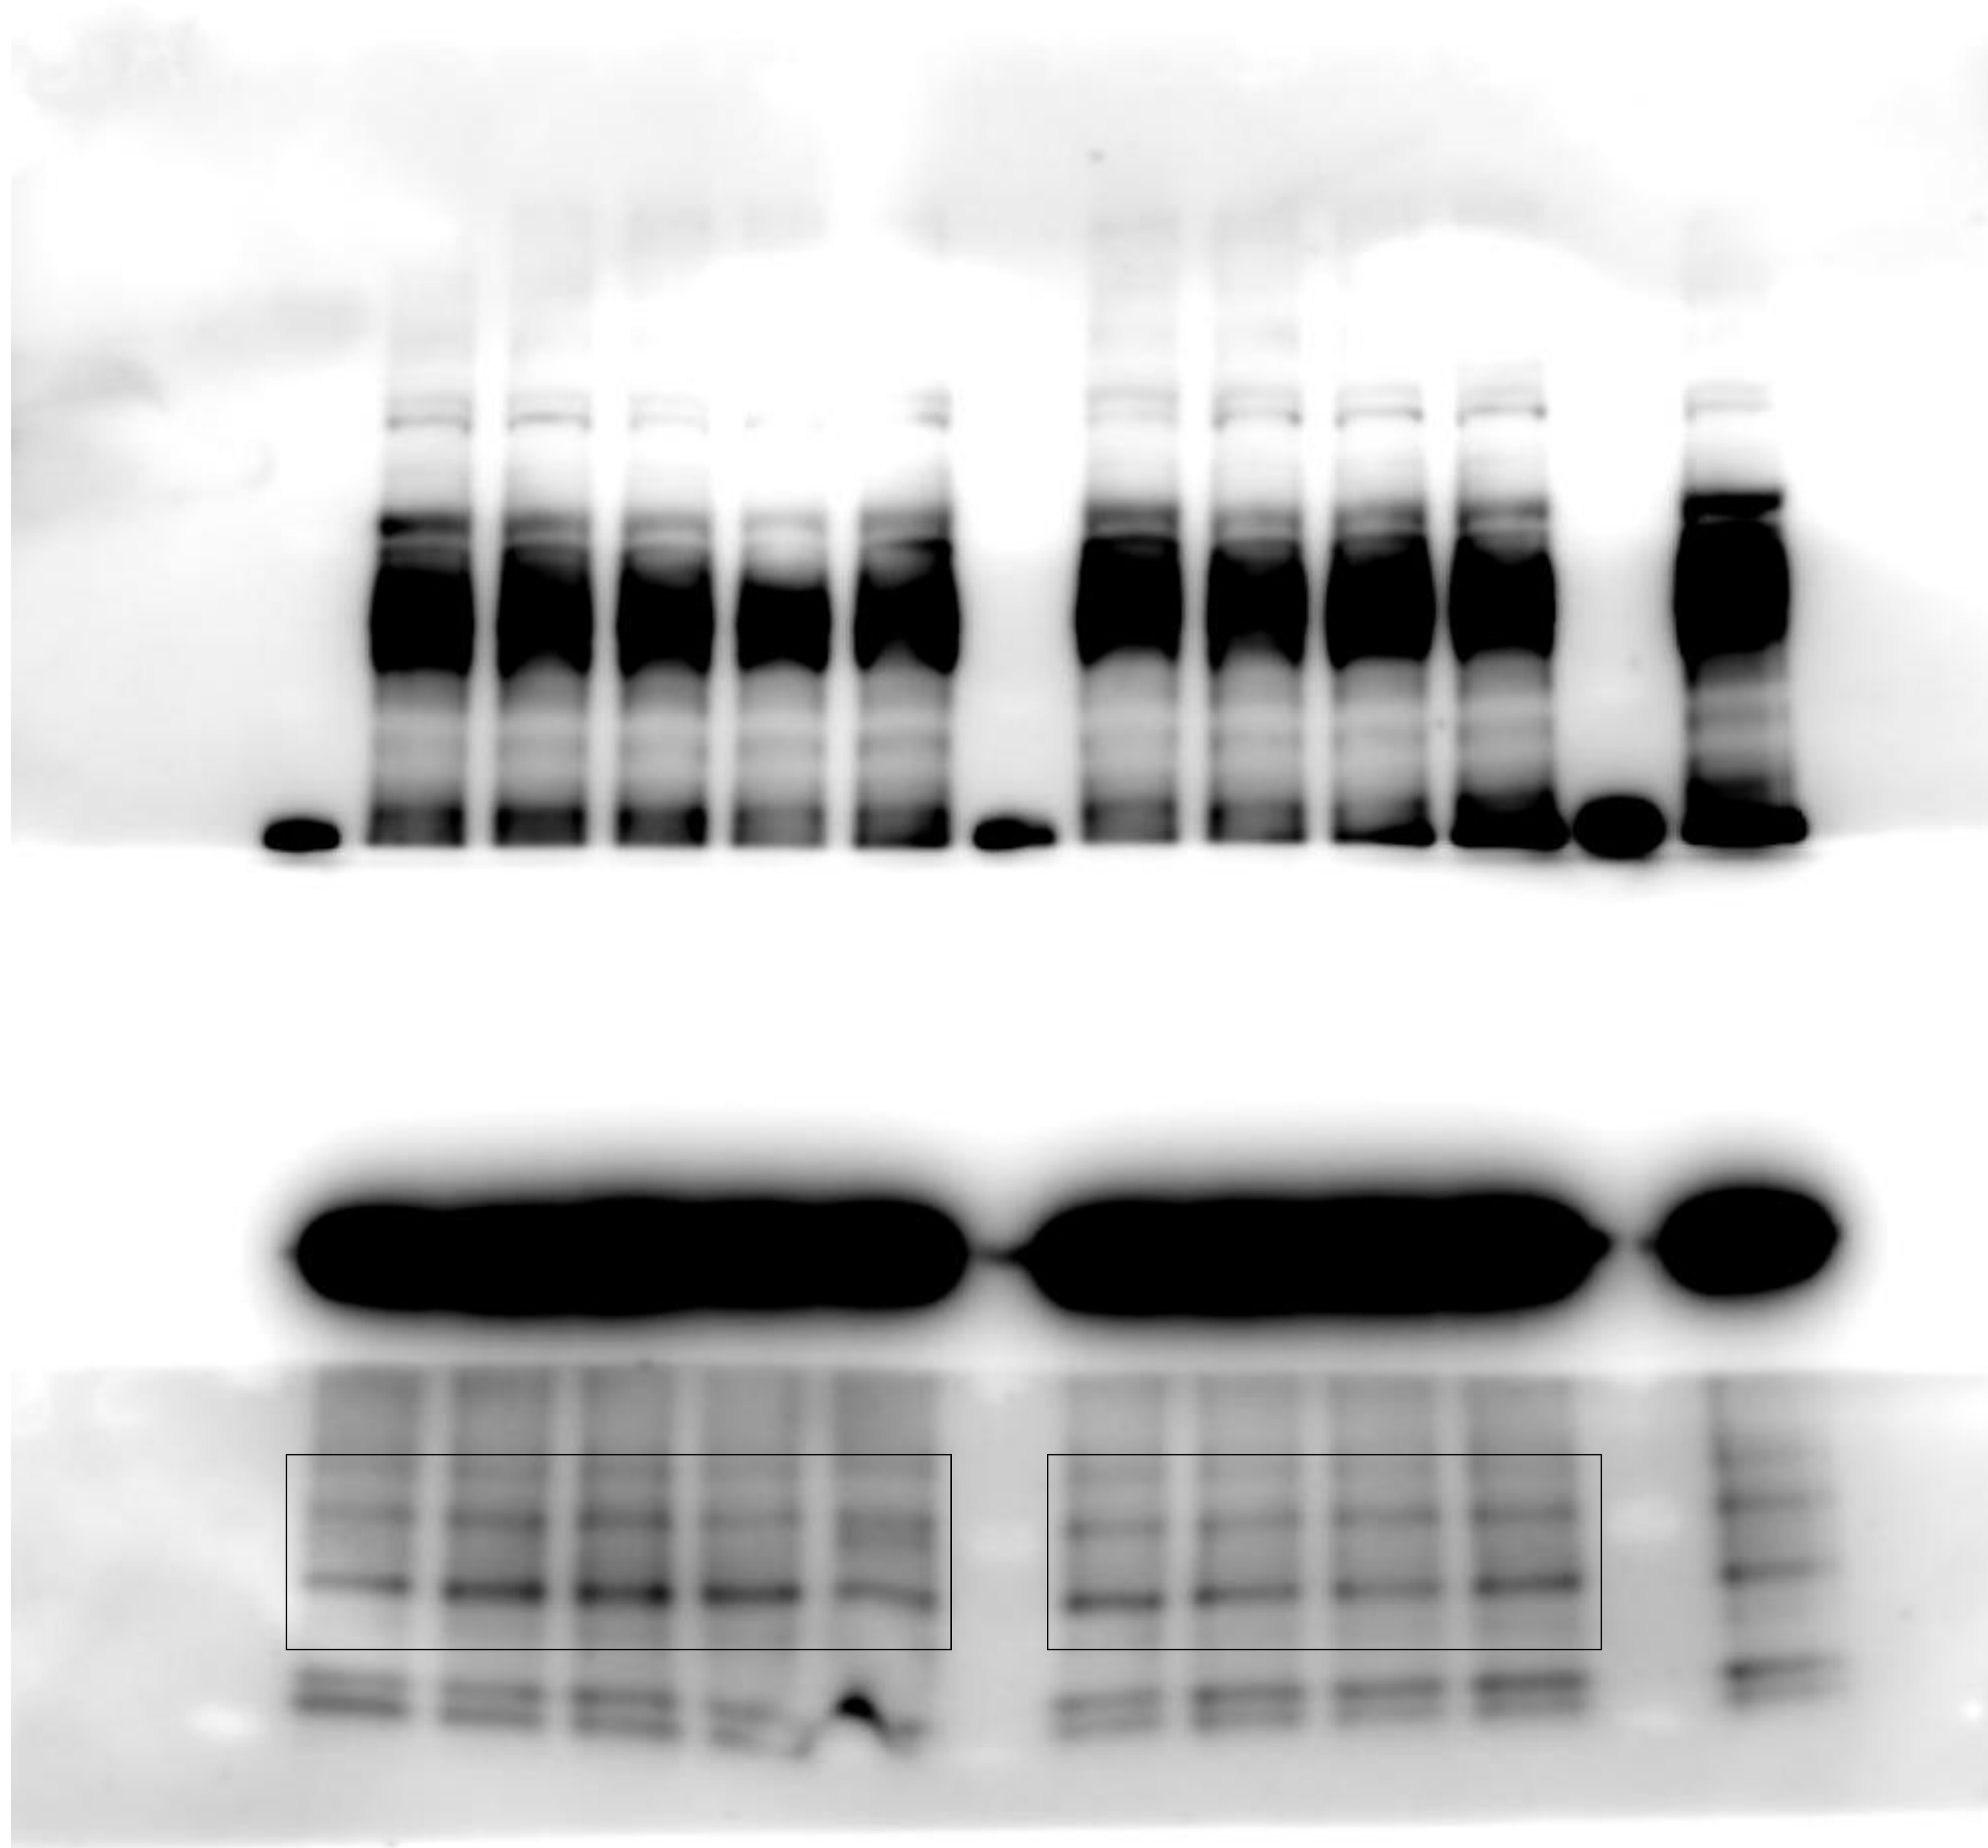

Figure 5a

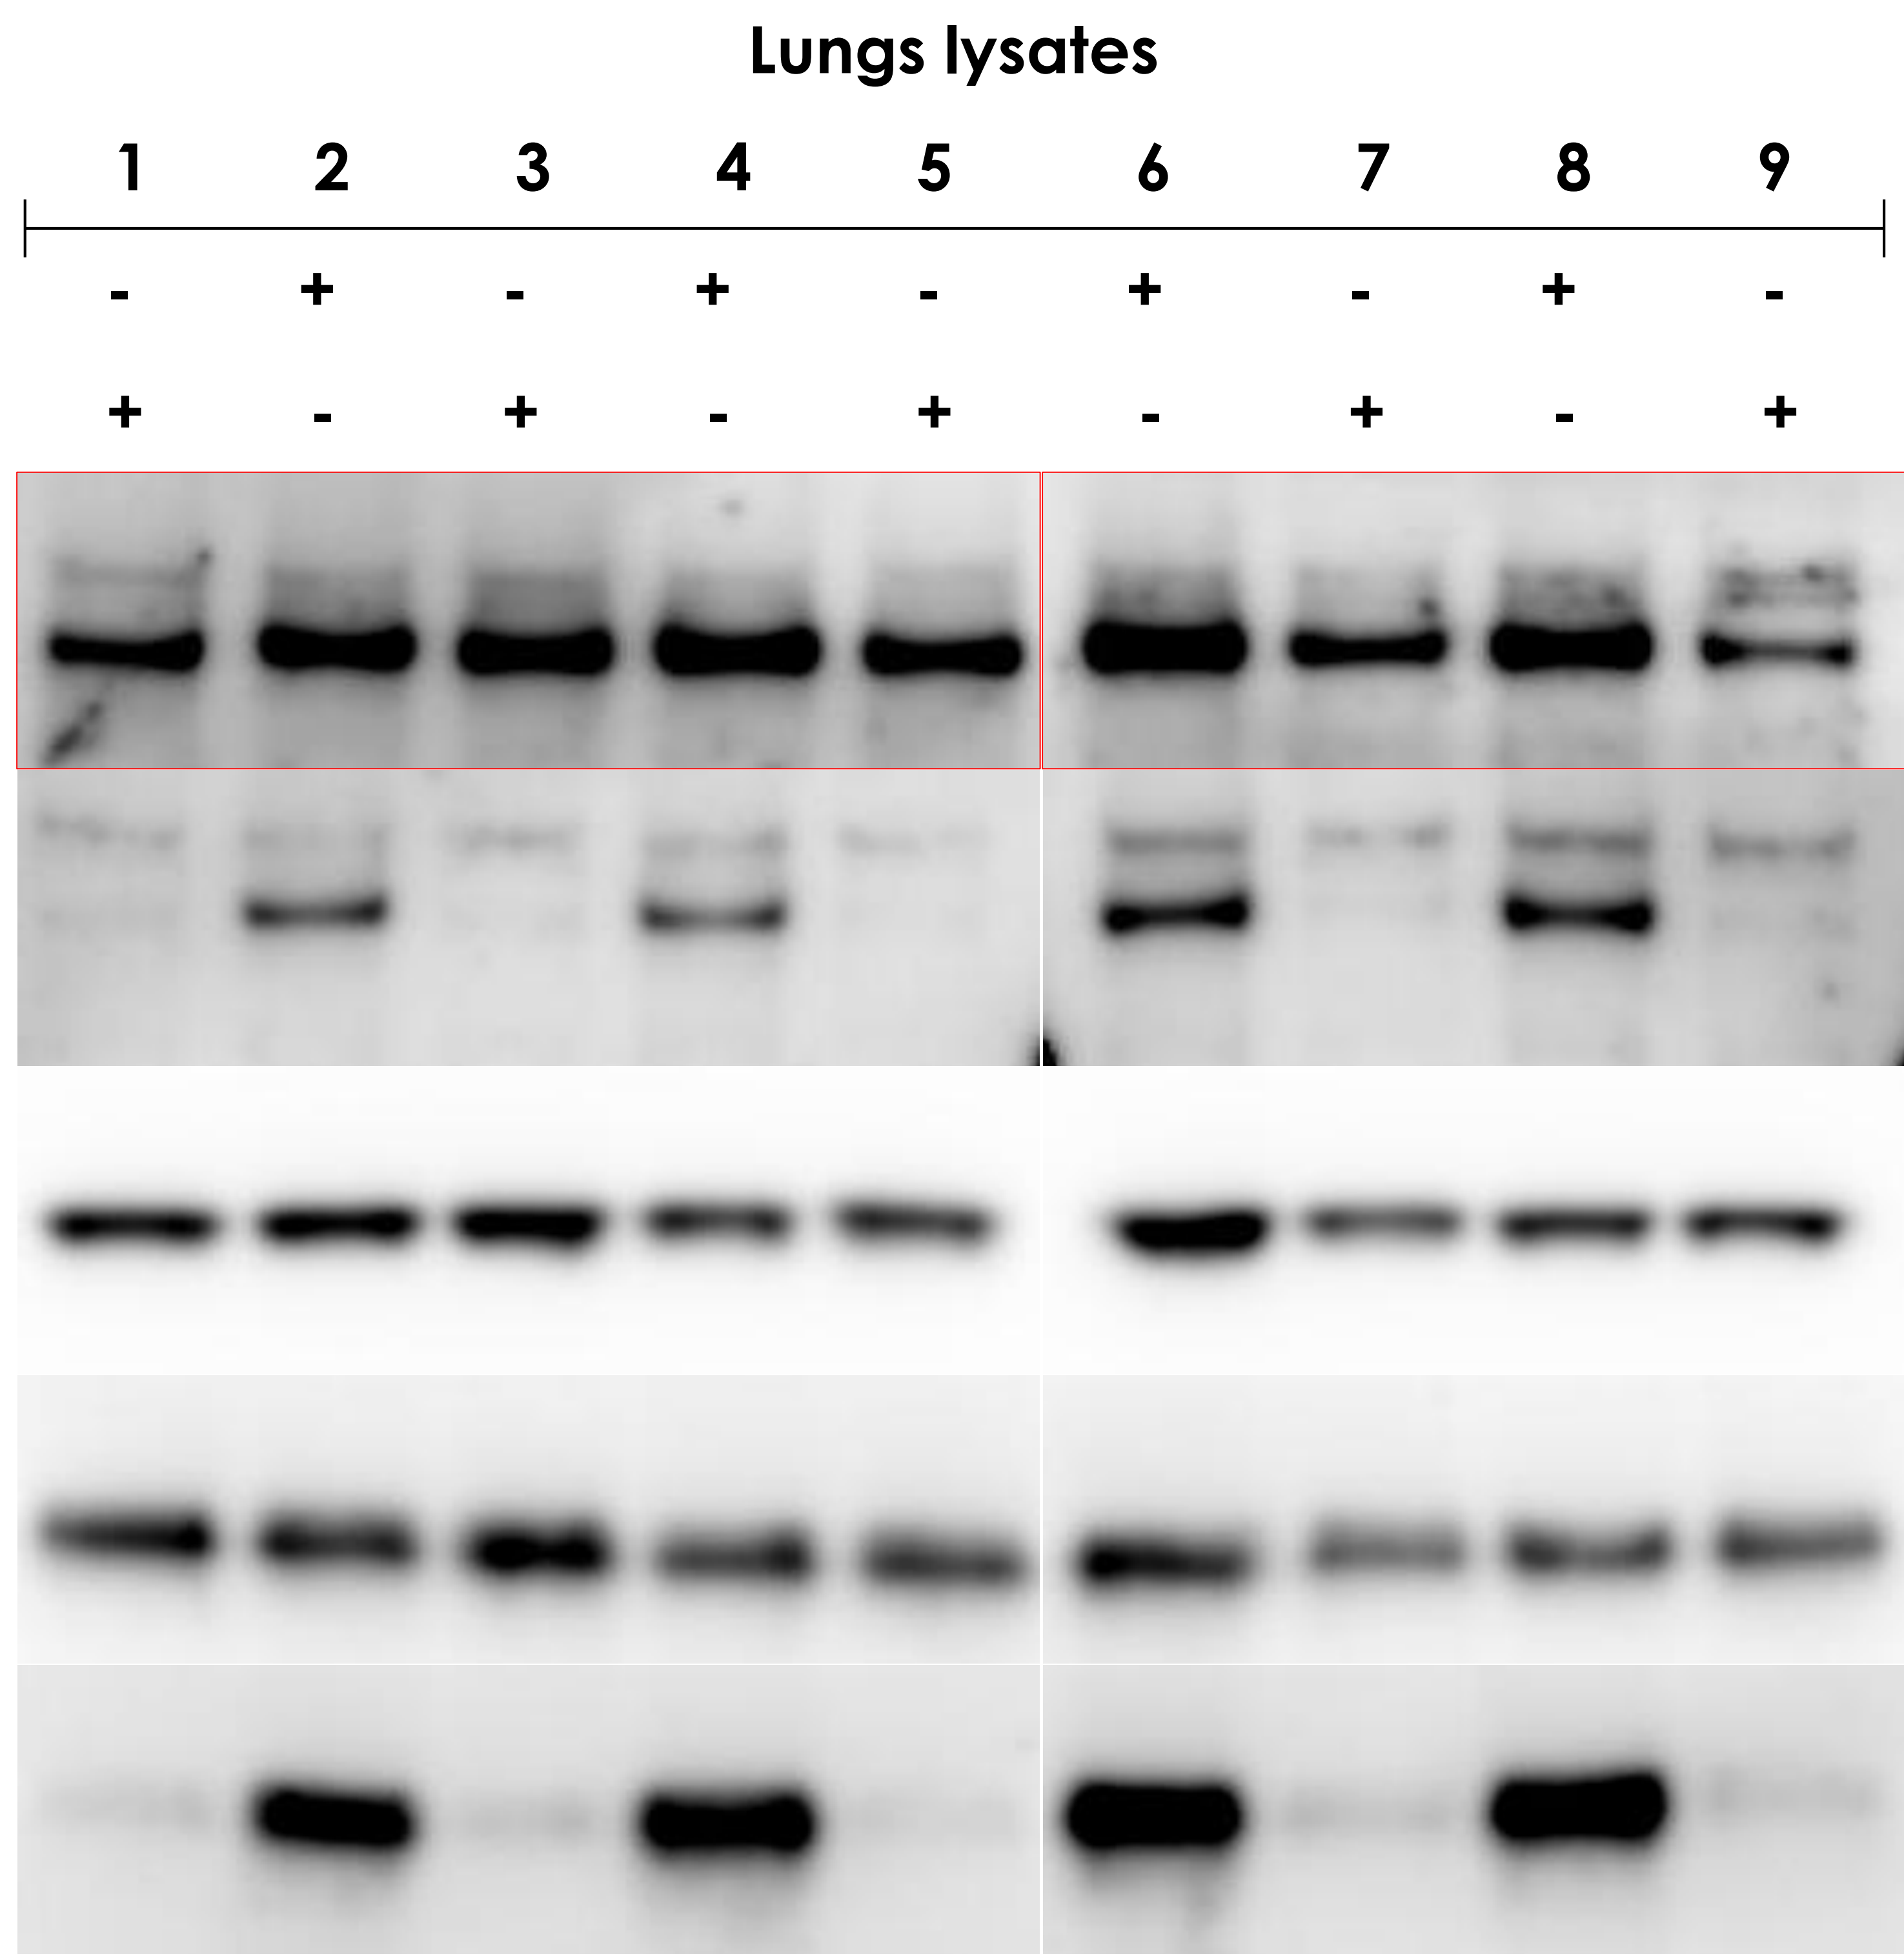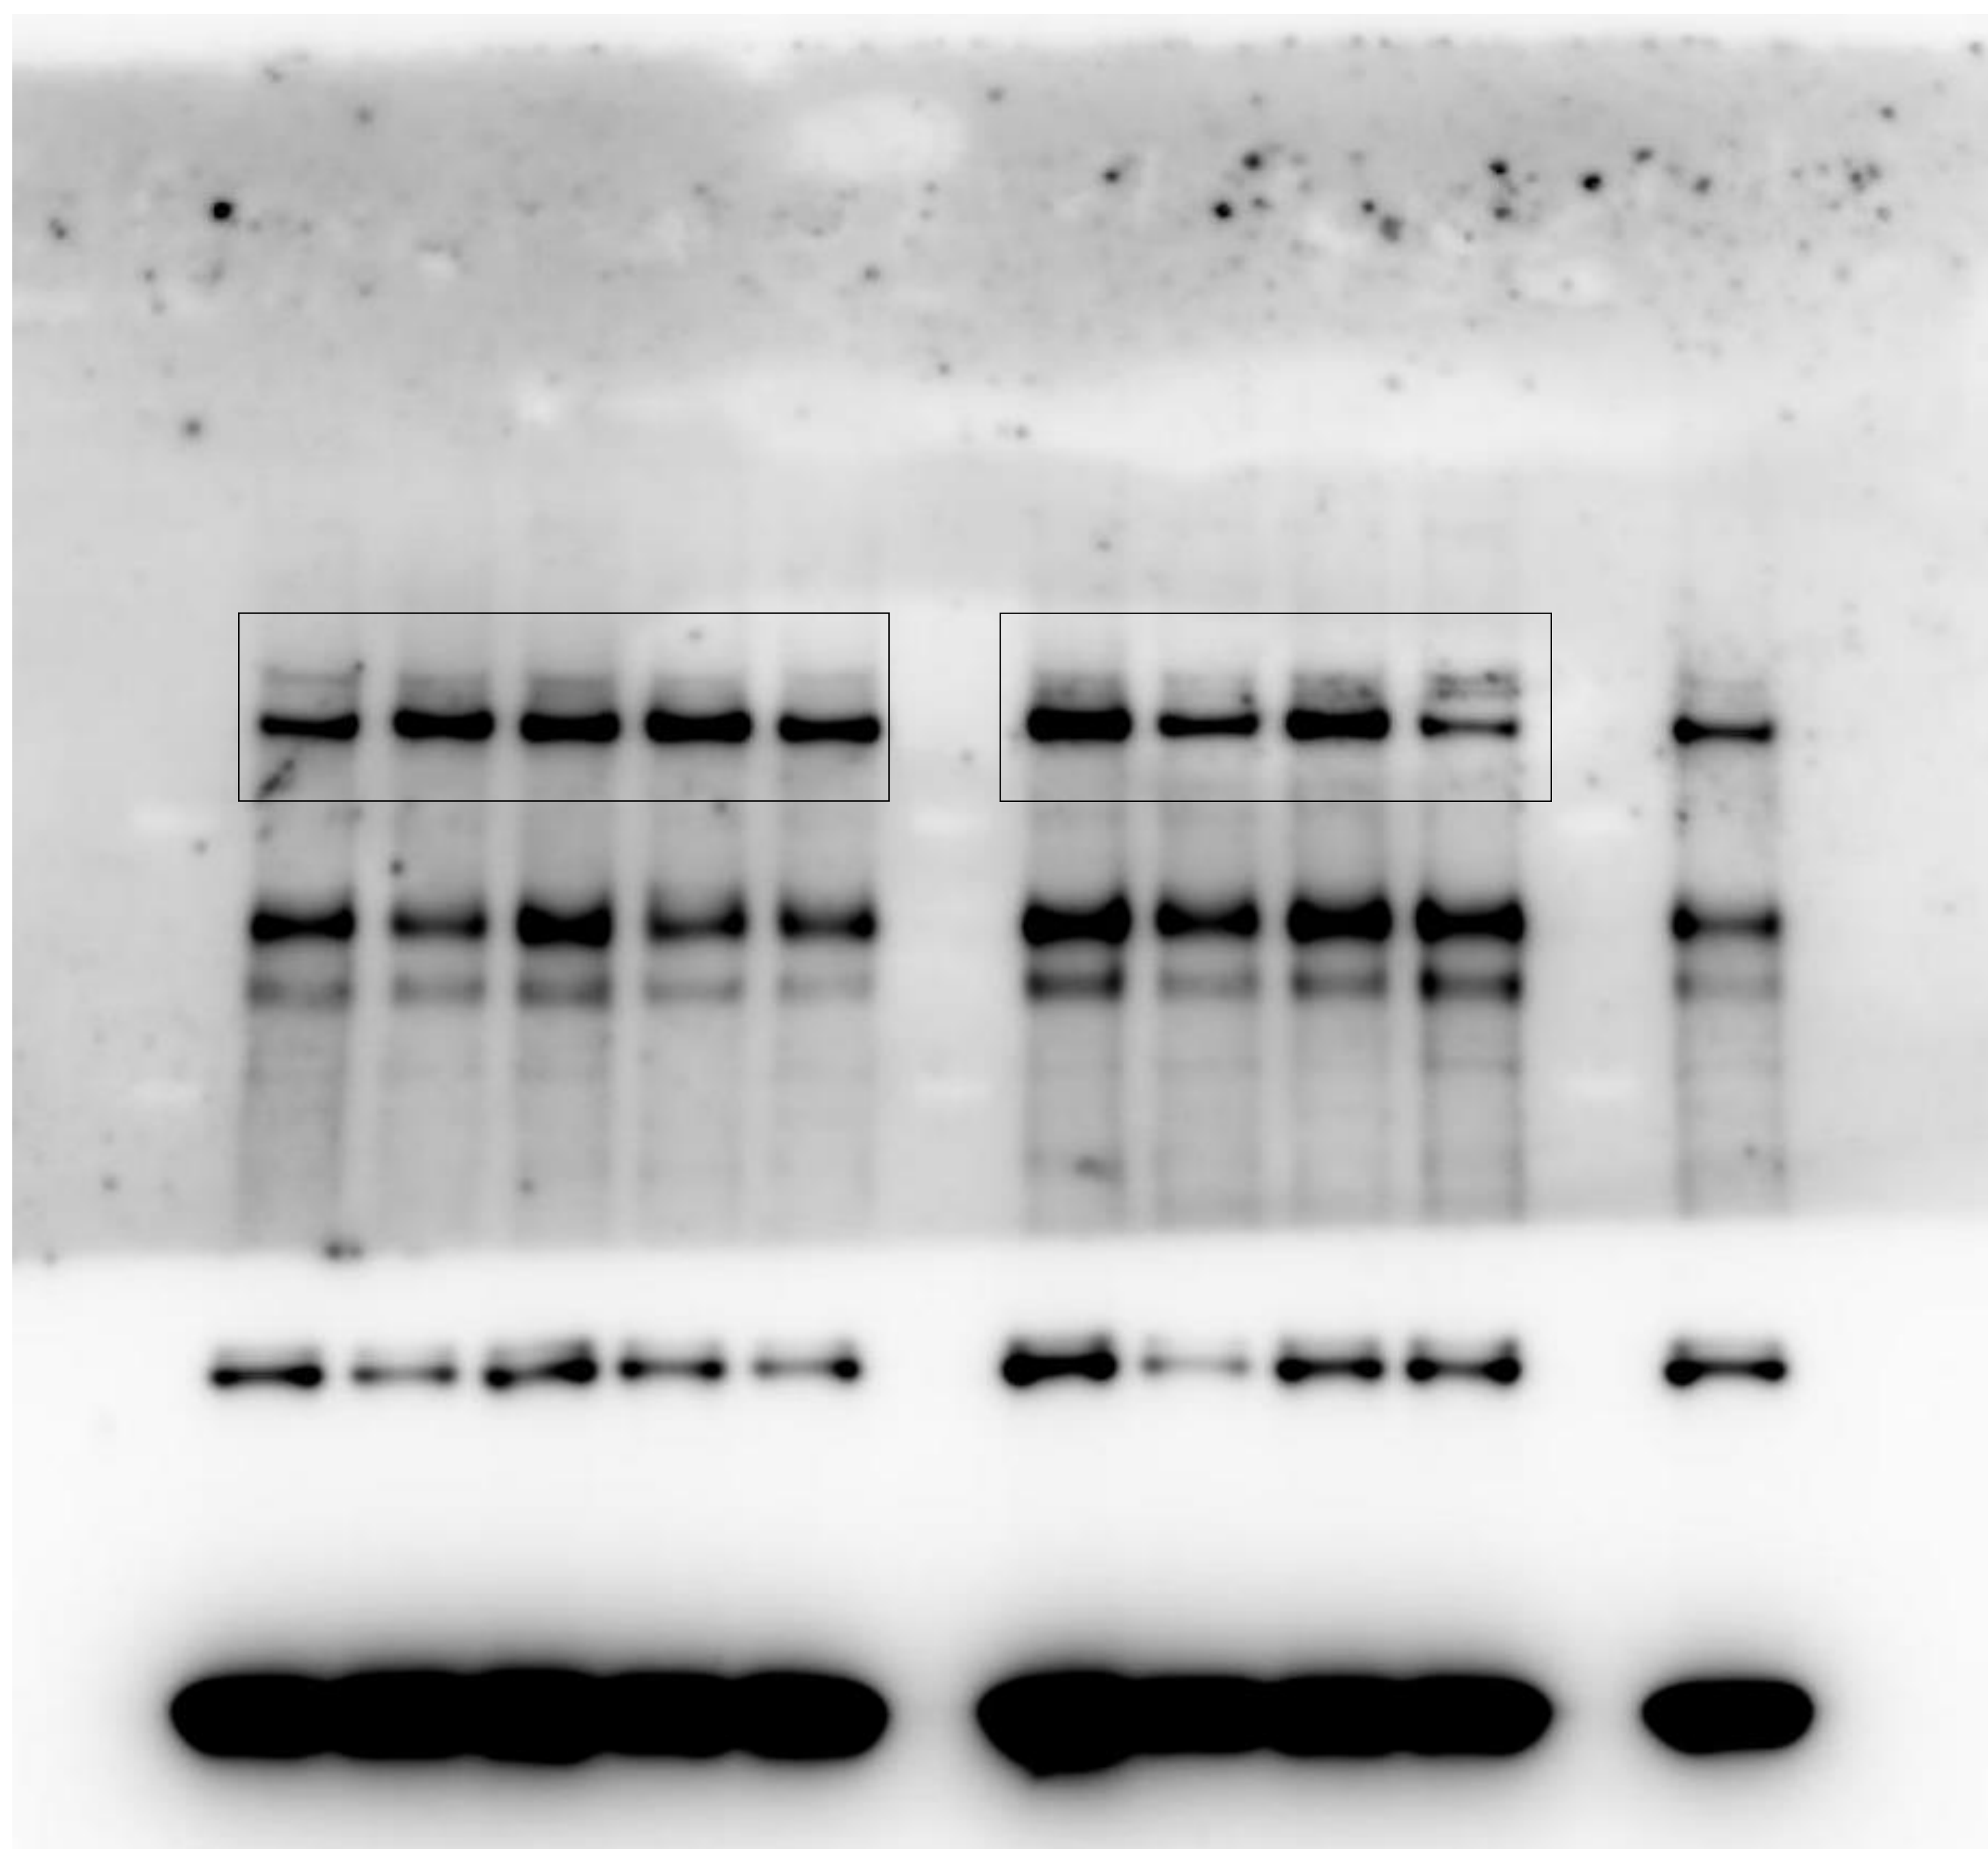



Figure 5a

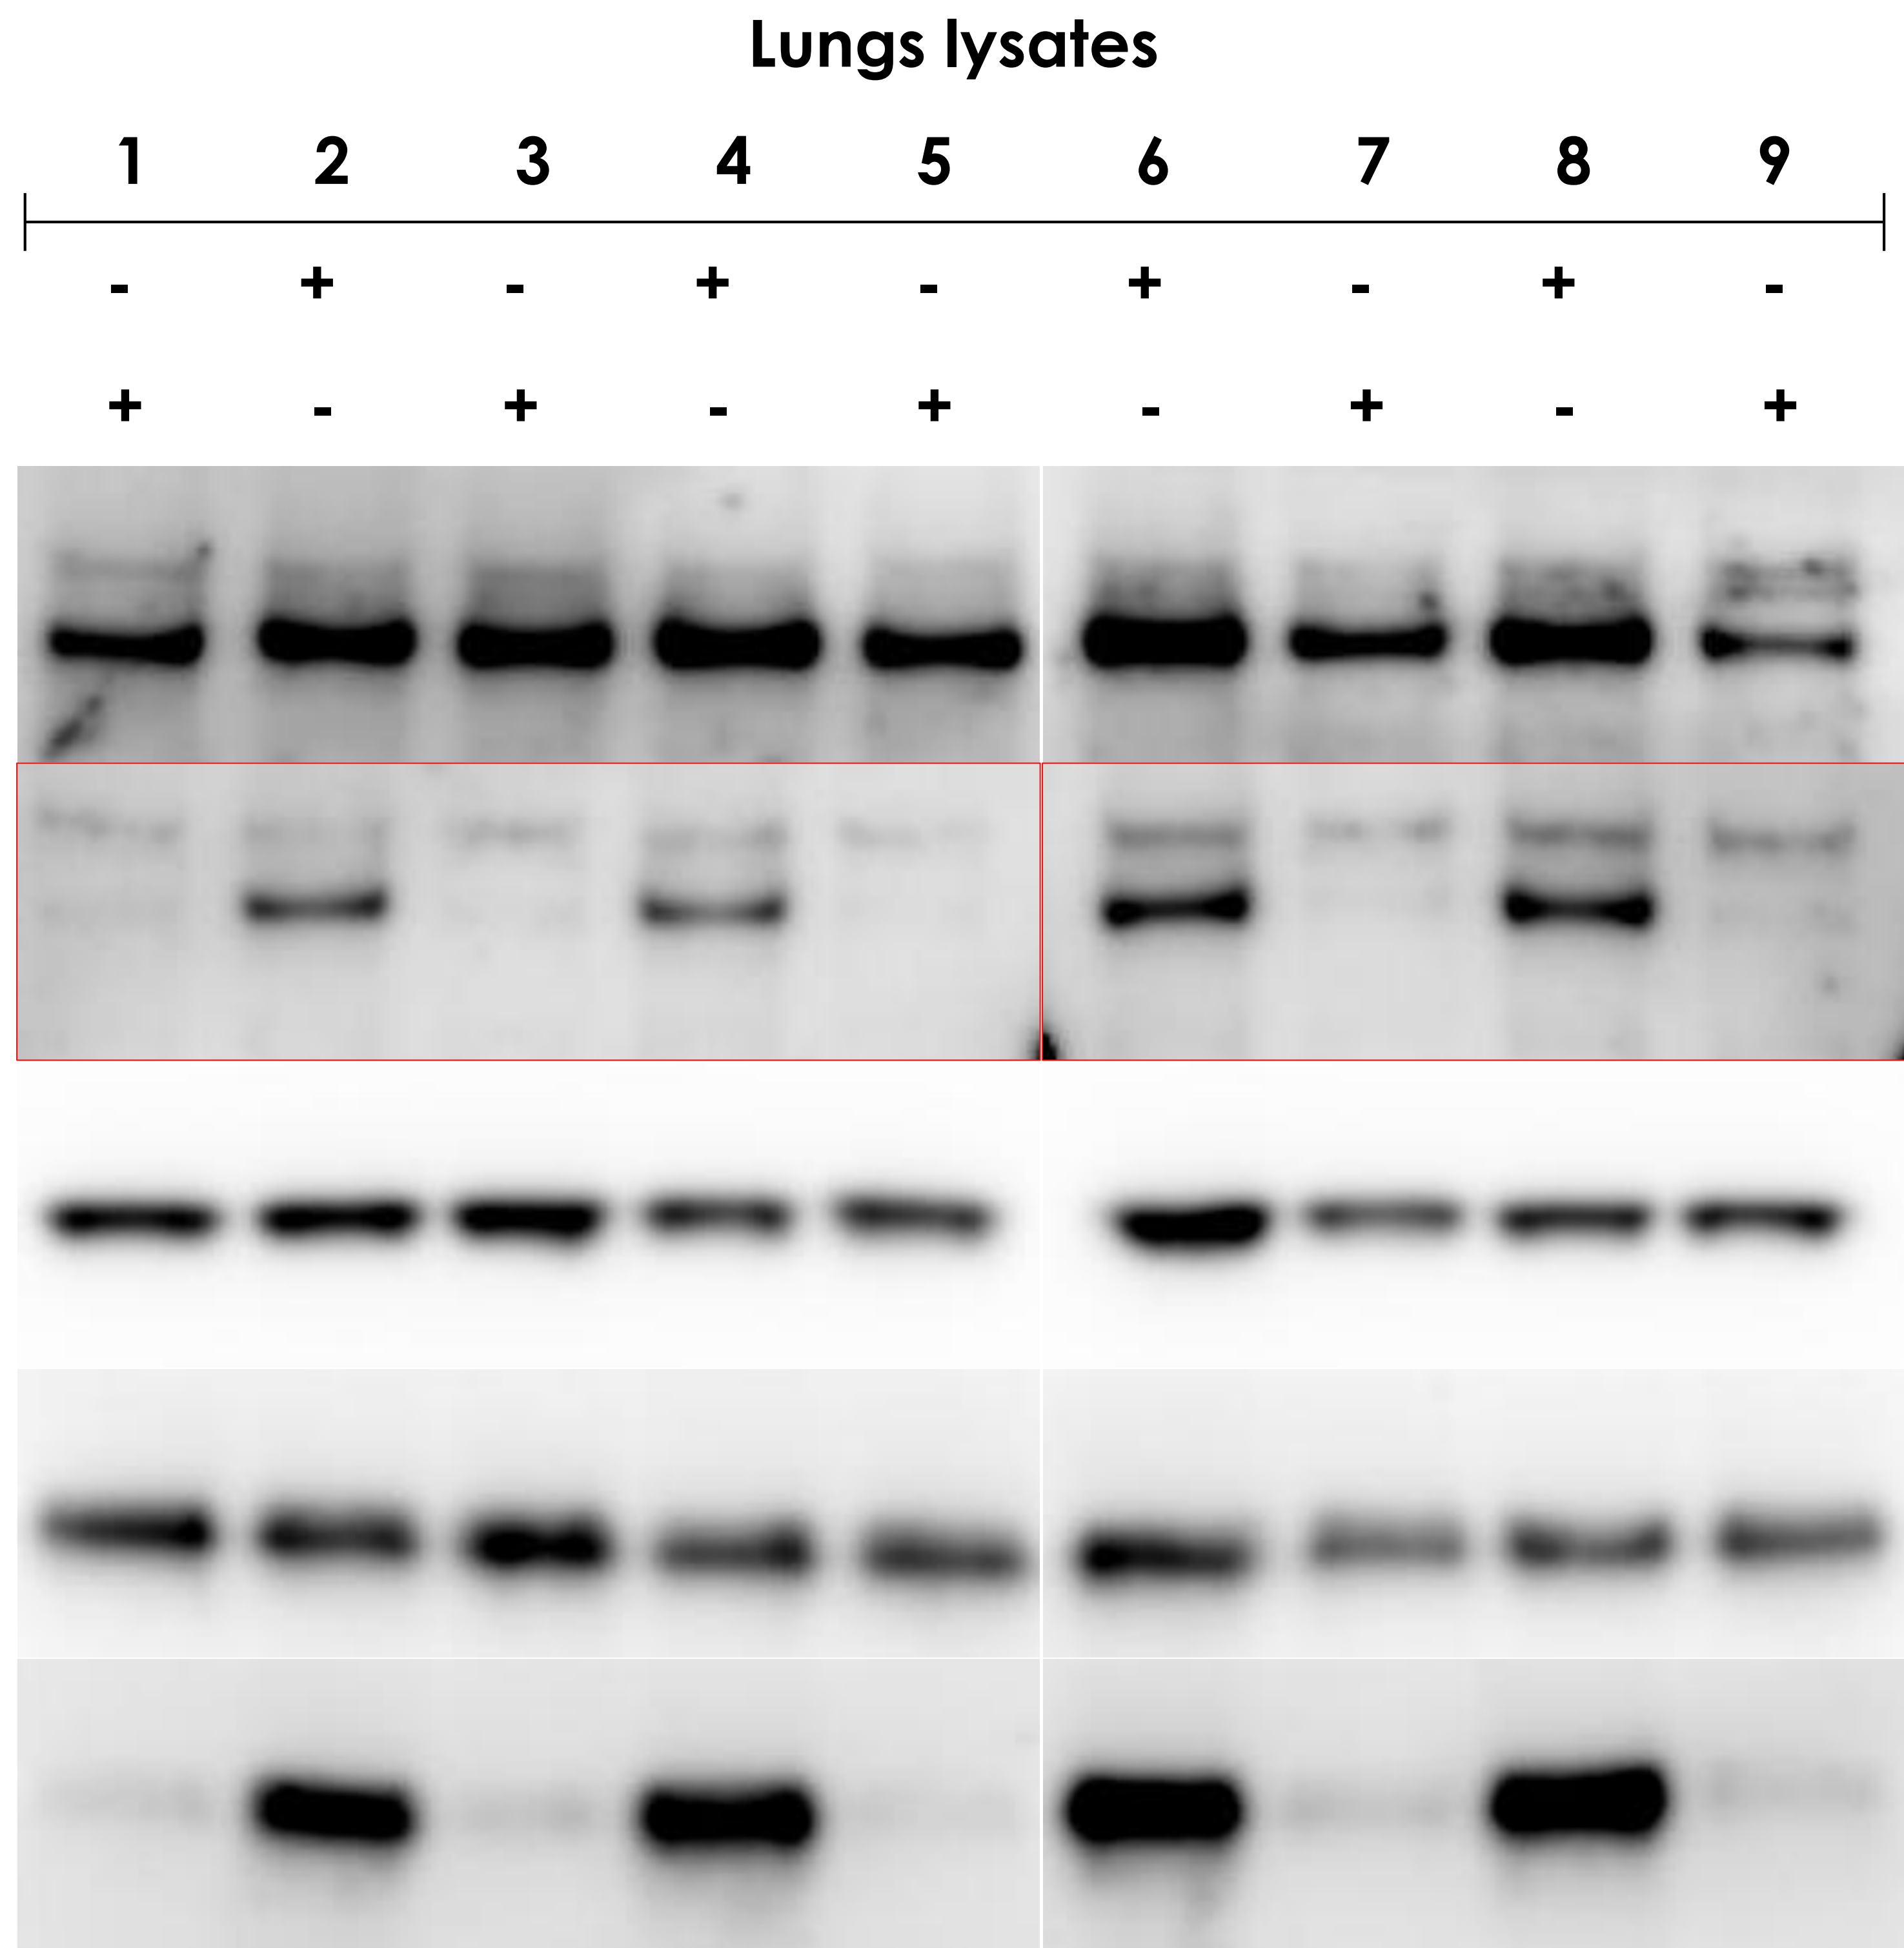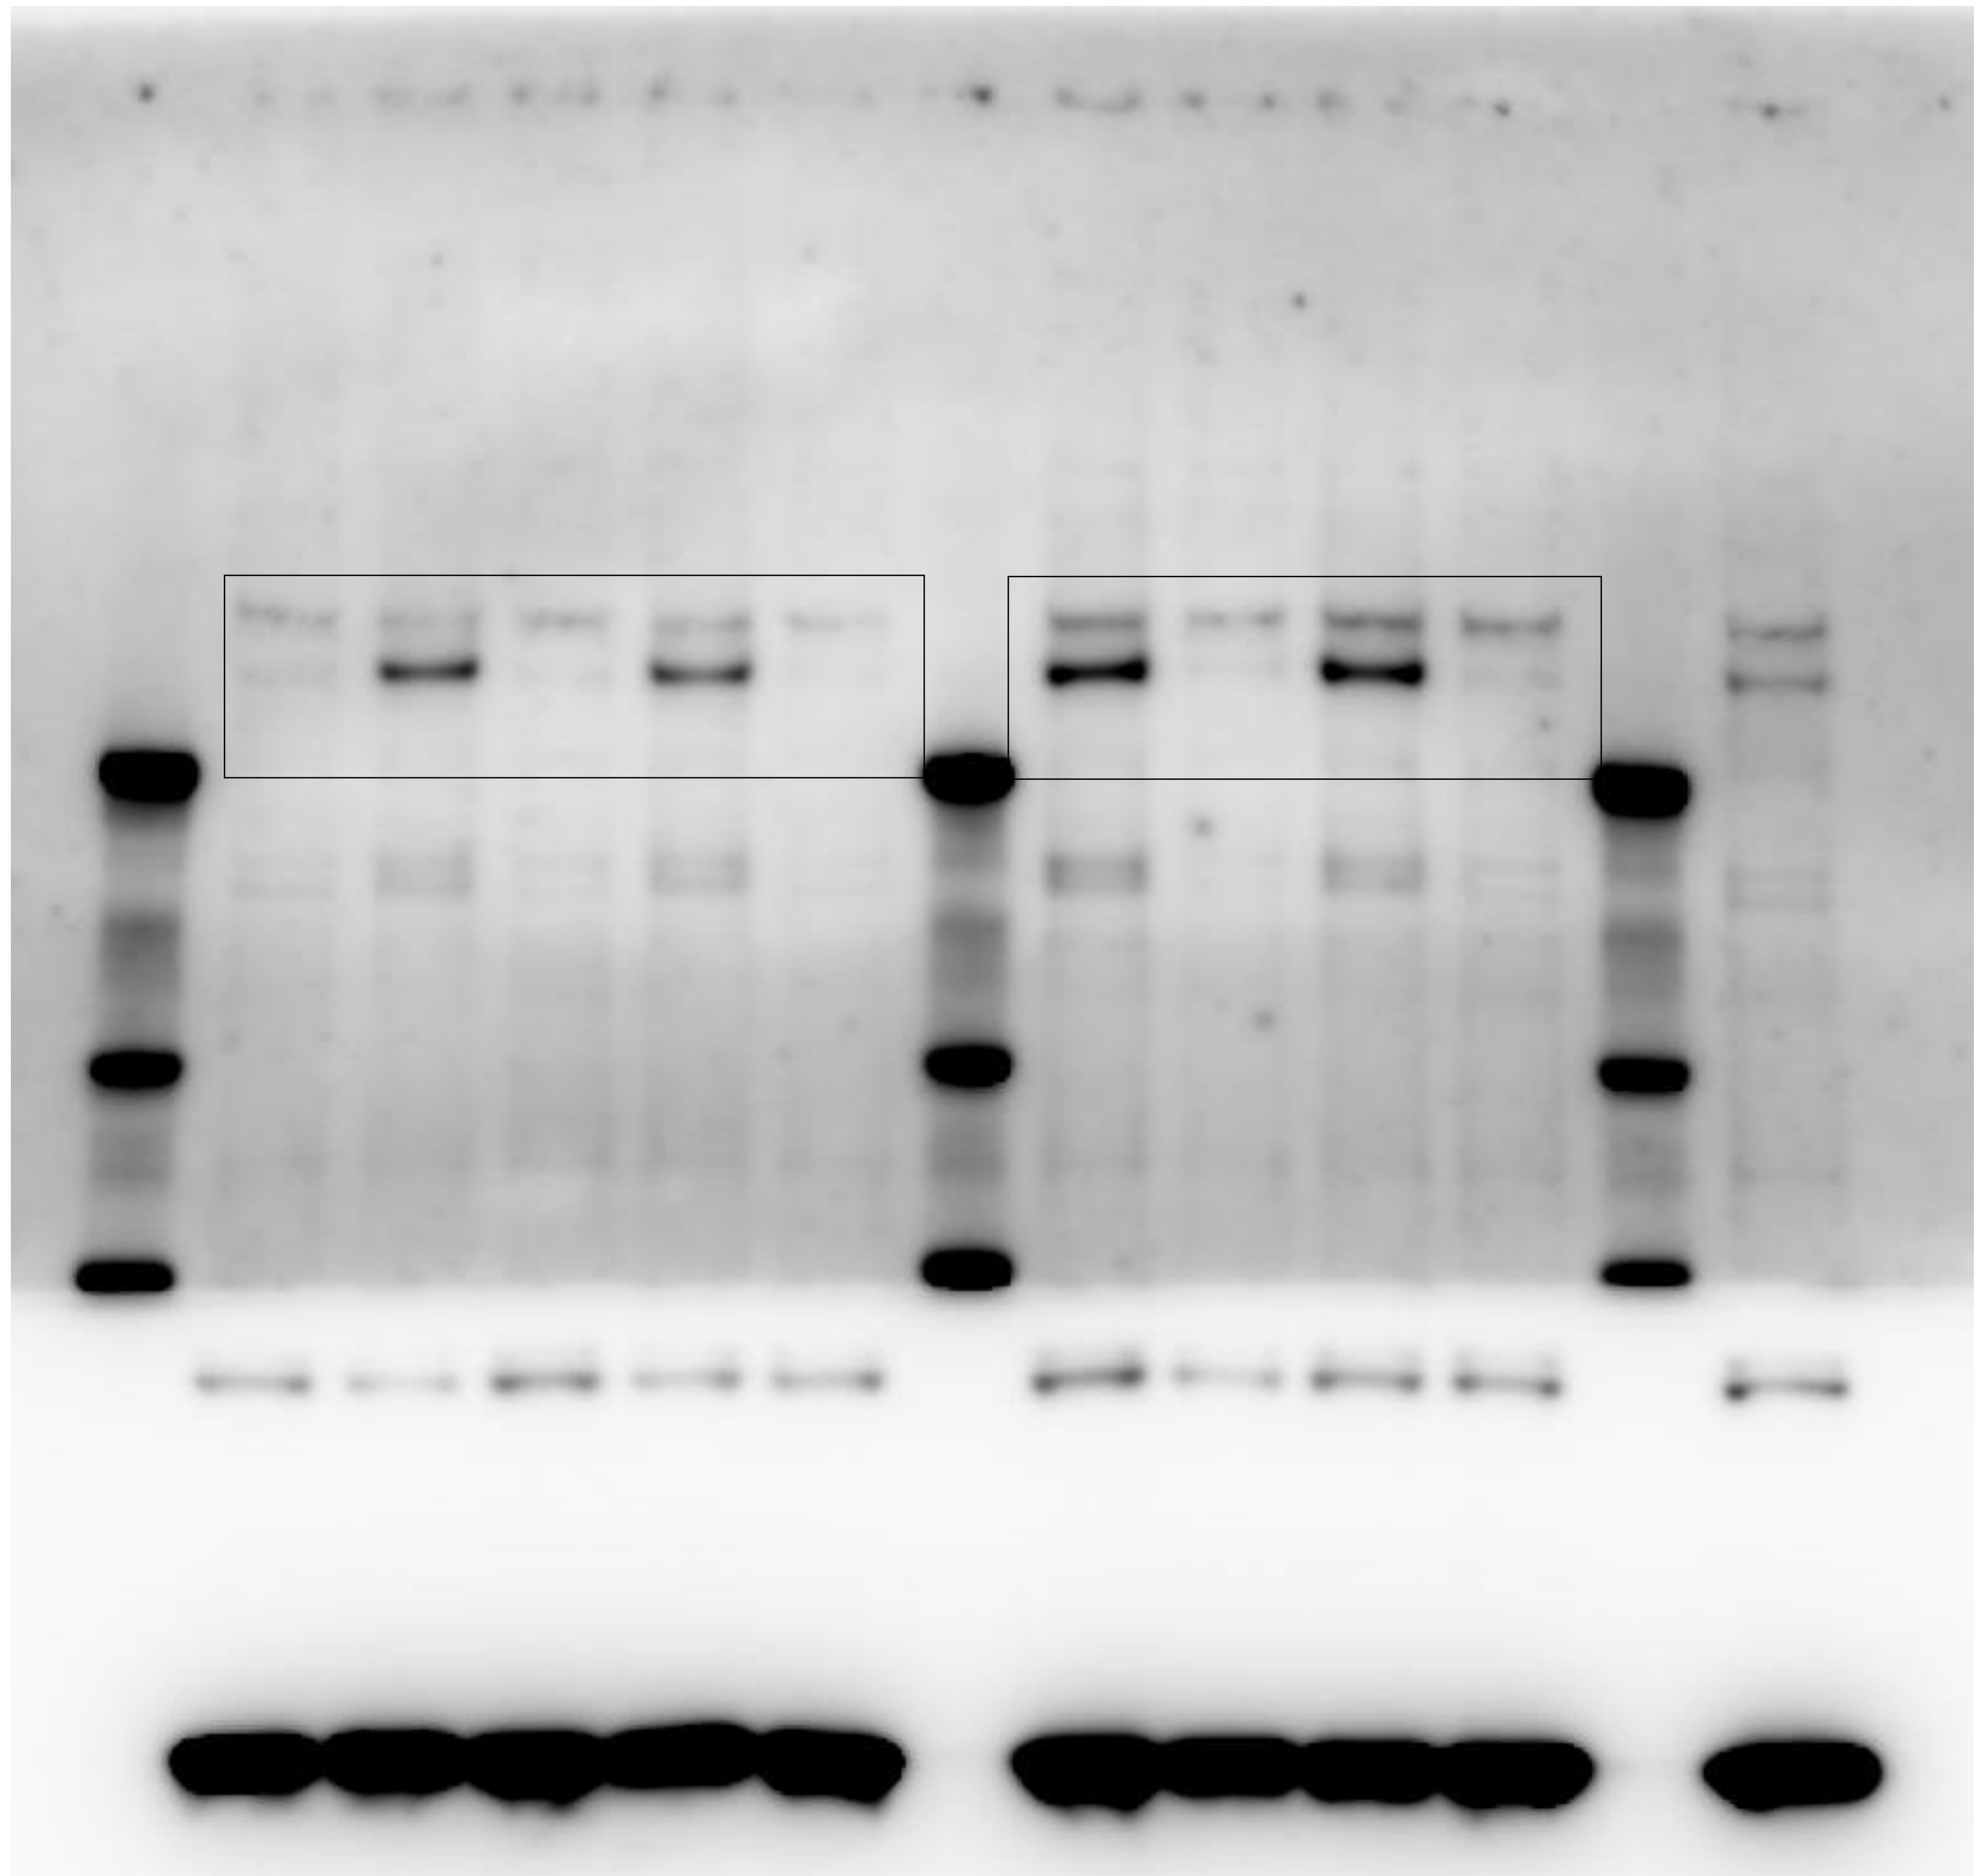

Figure 5a

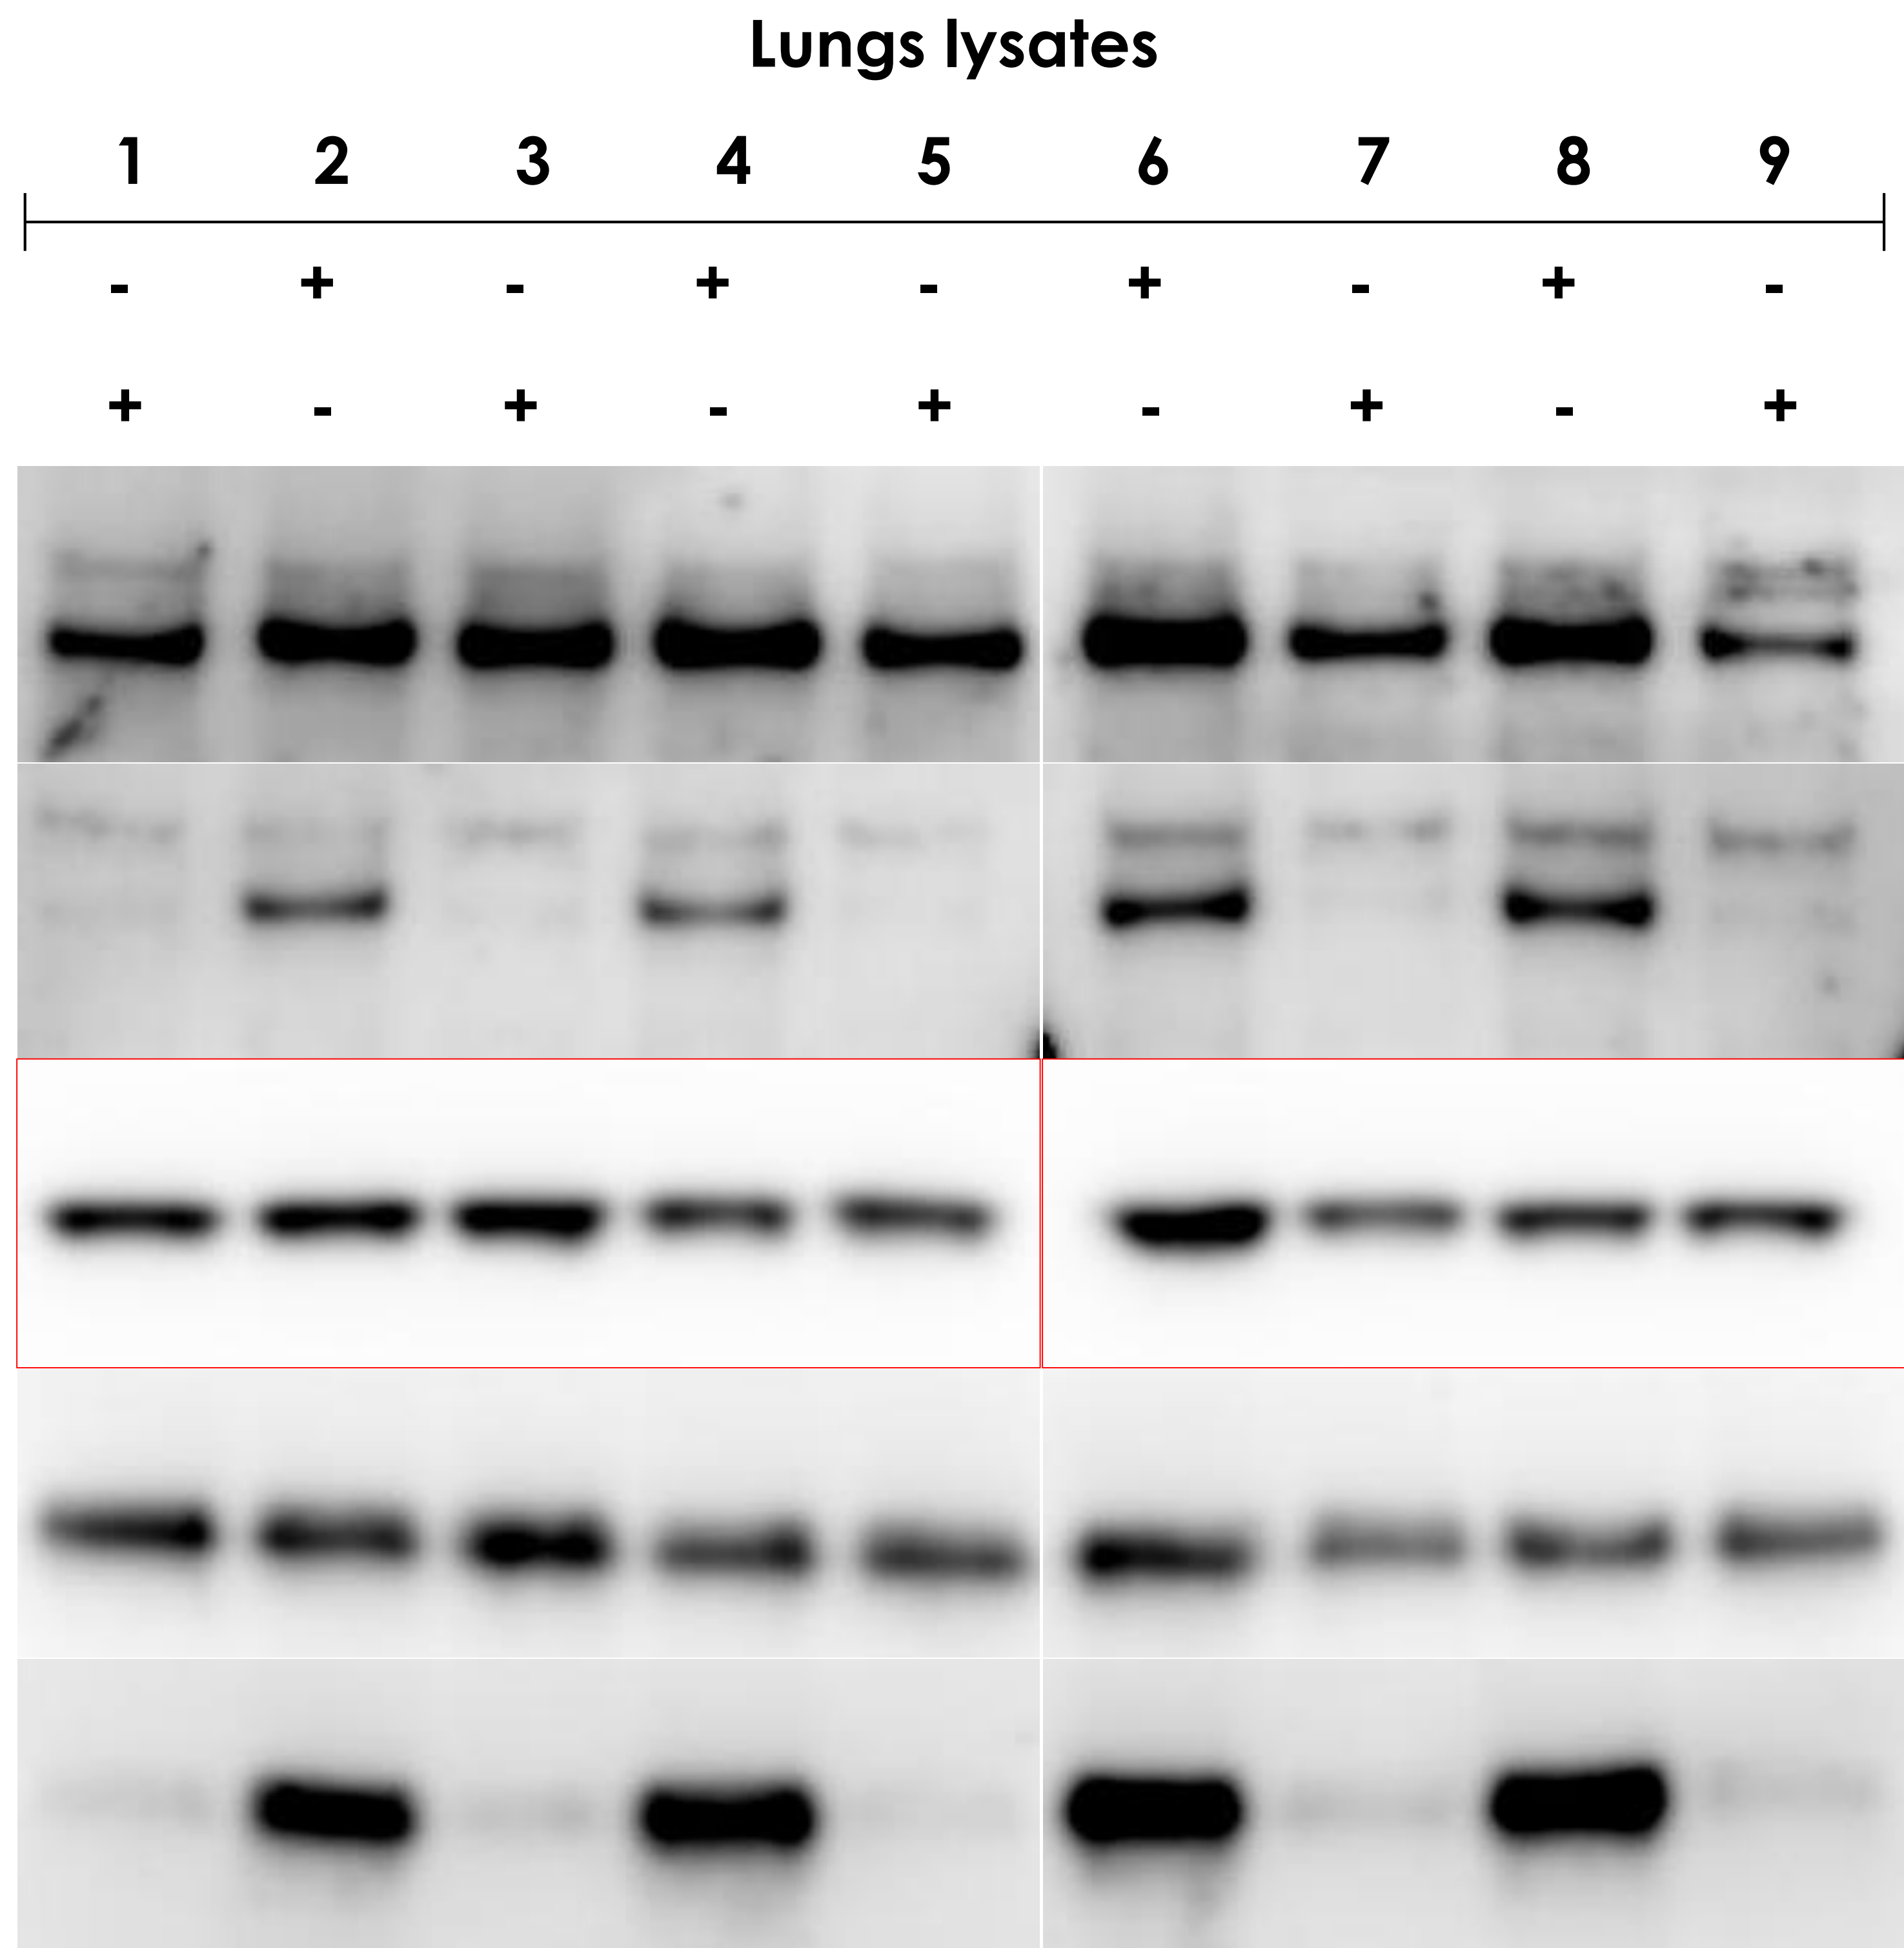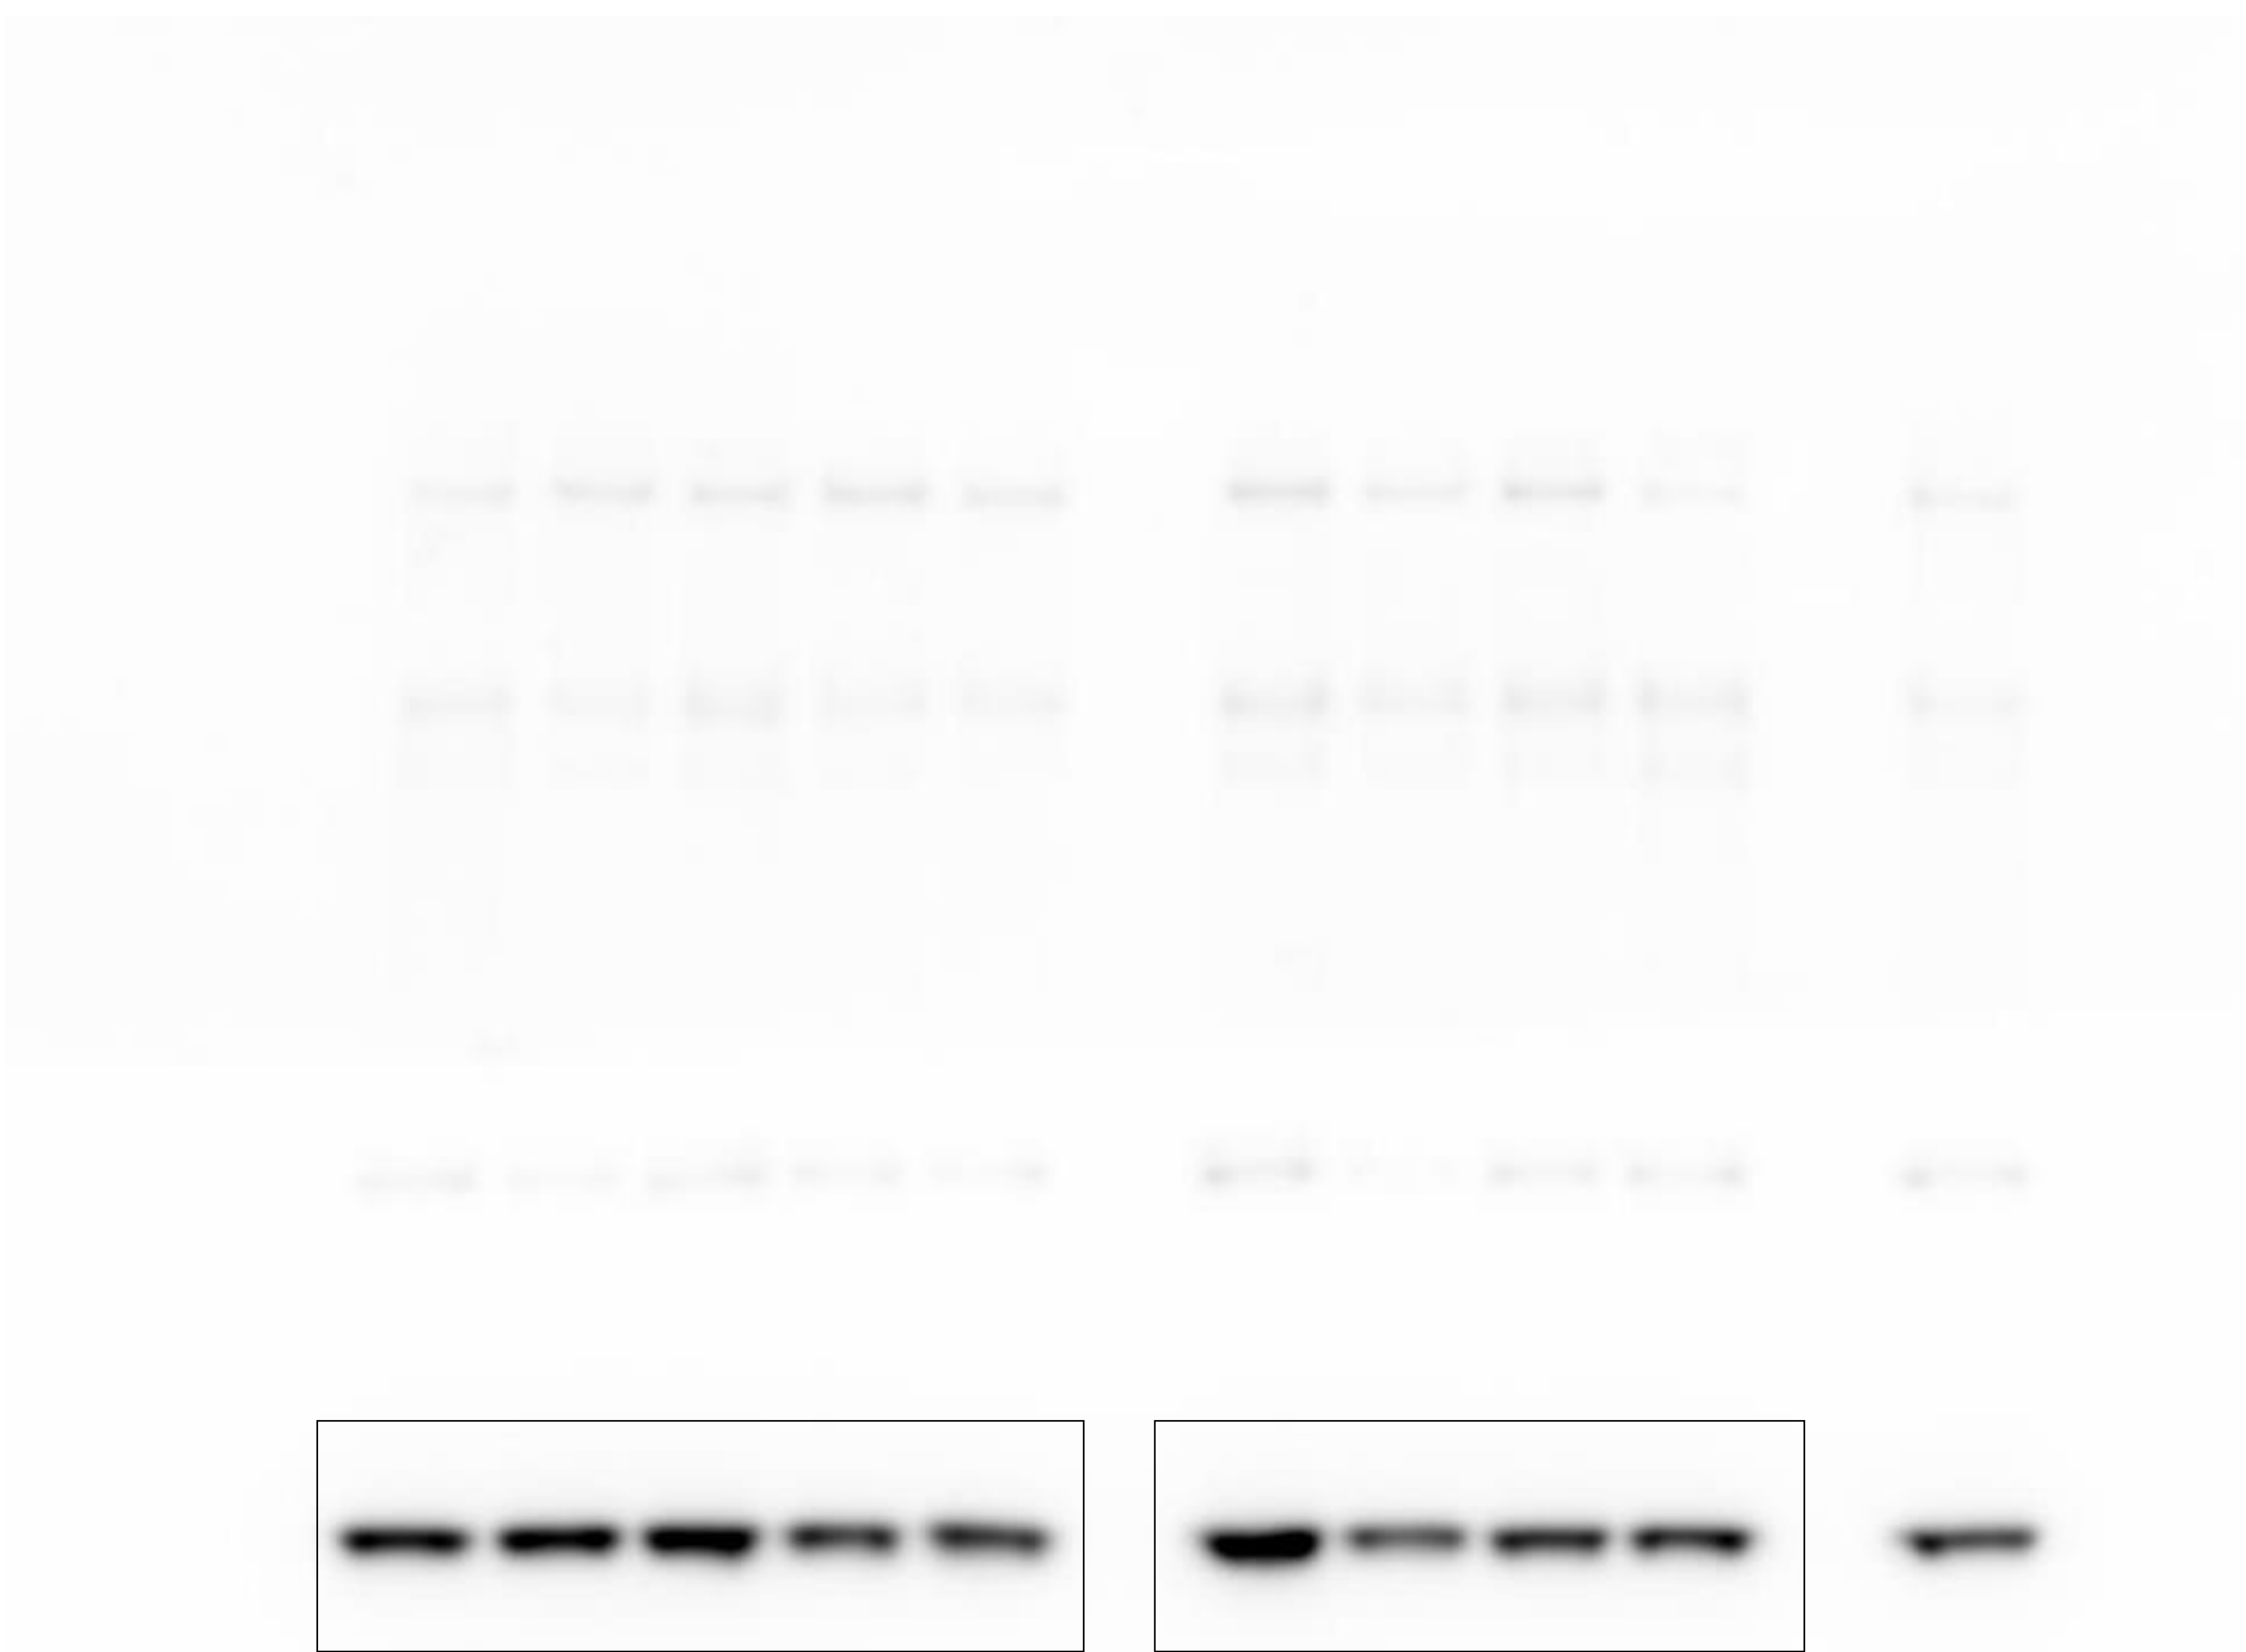

Figure 5a

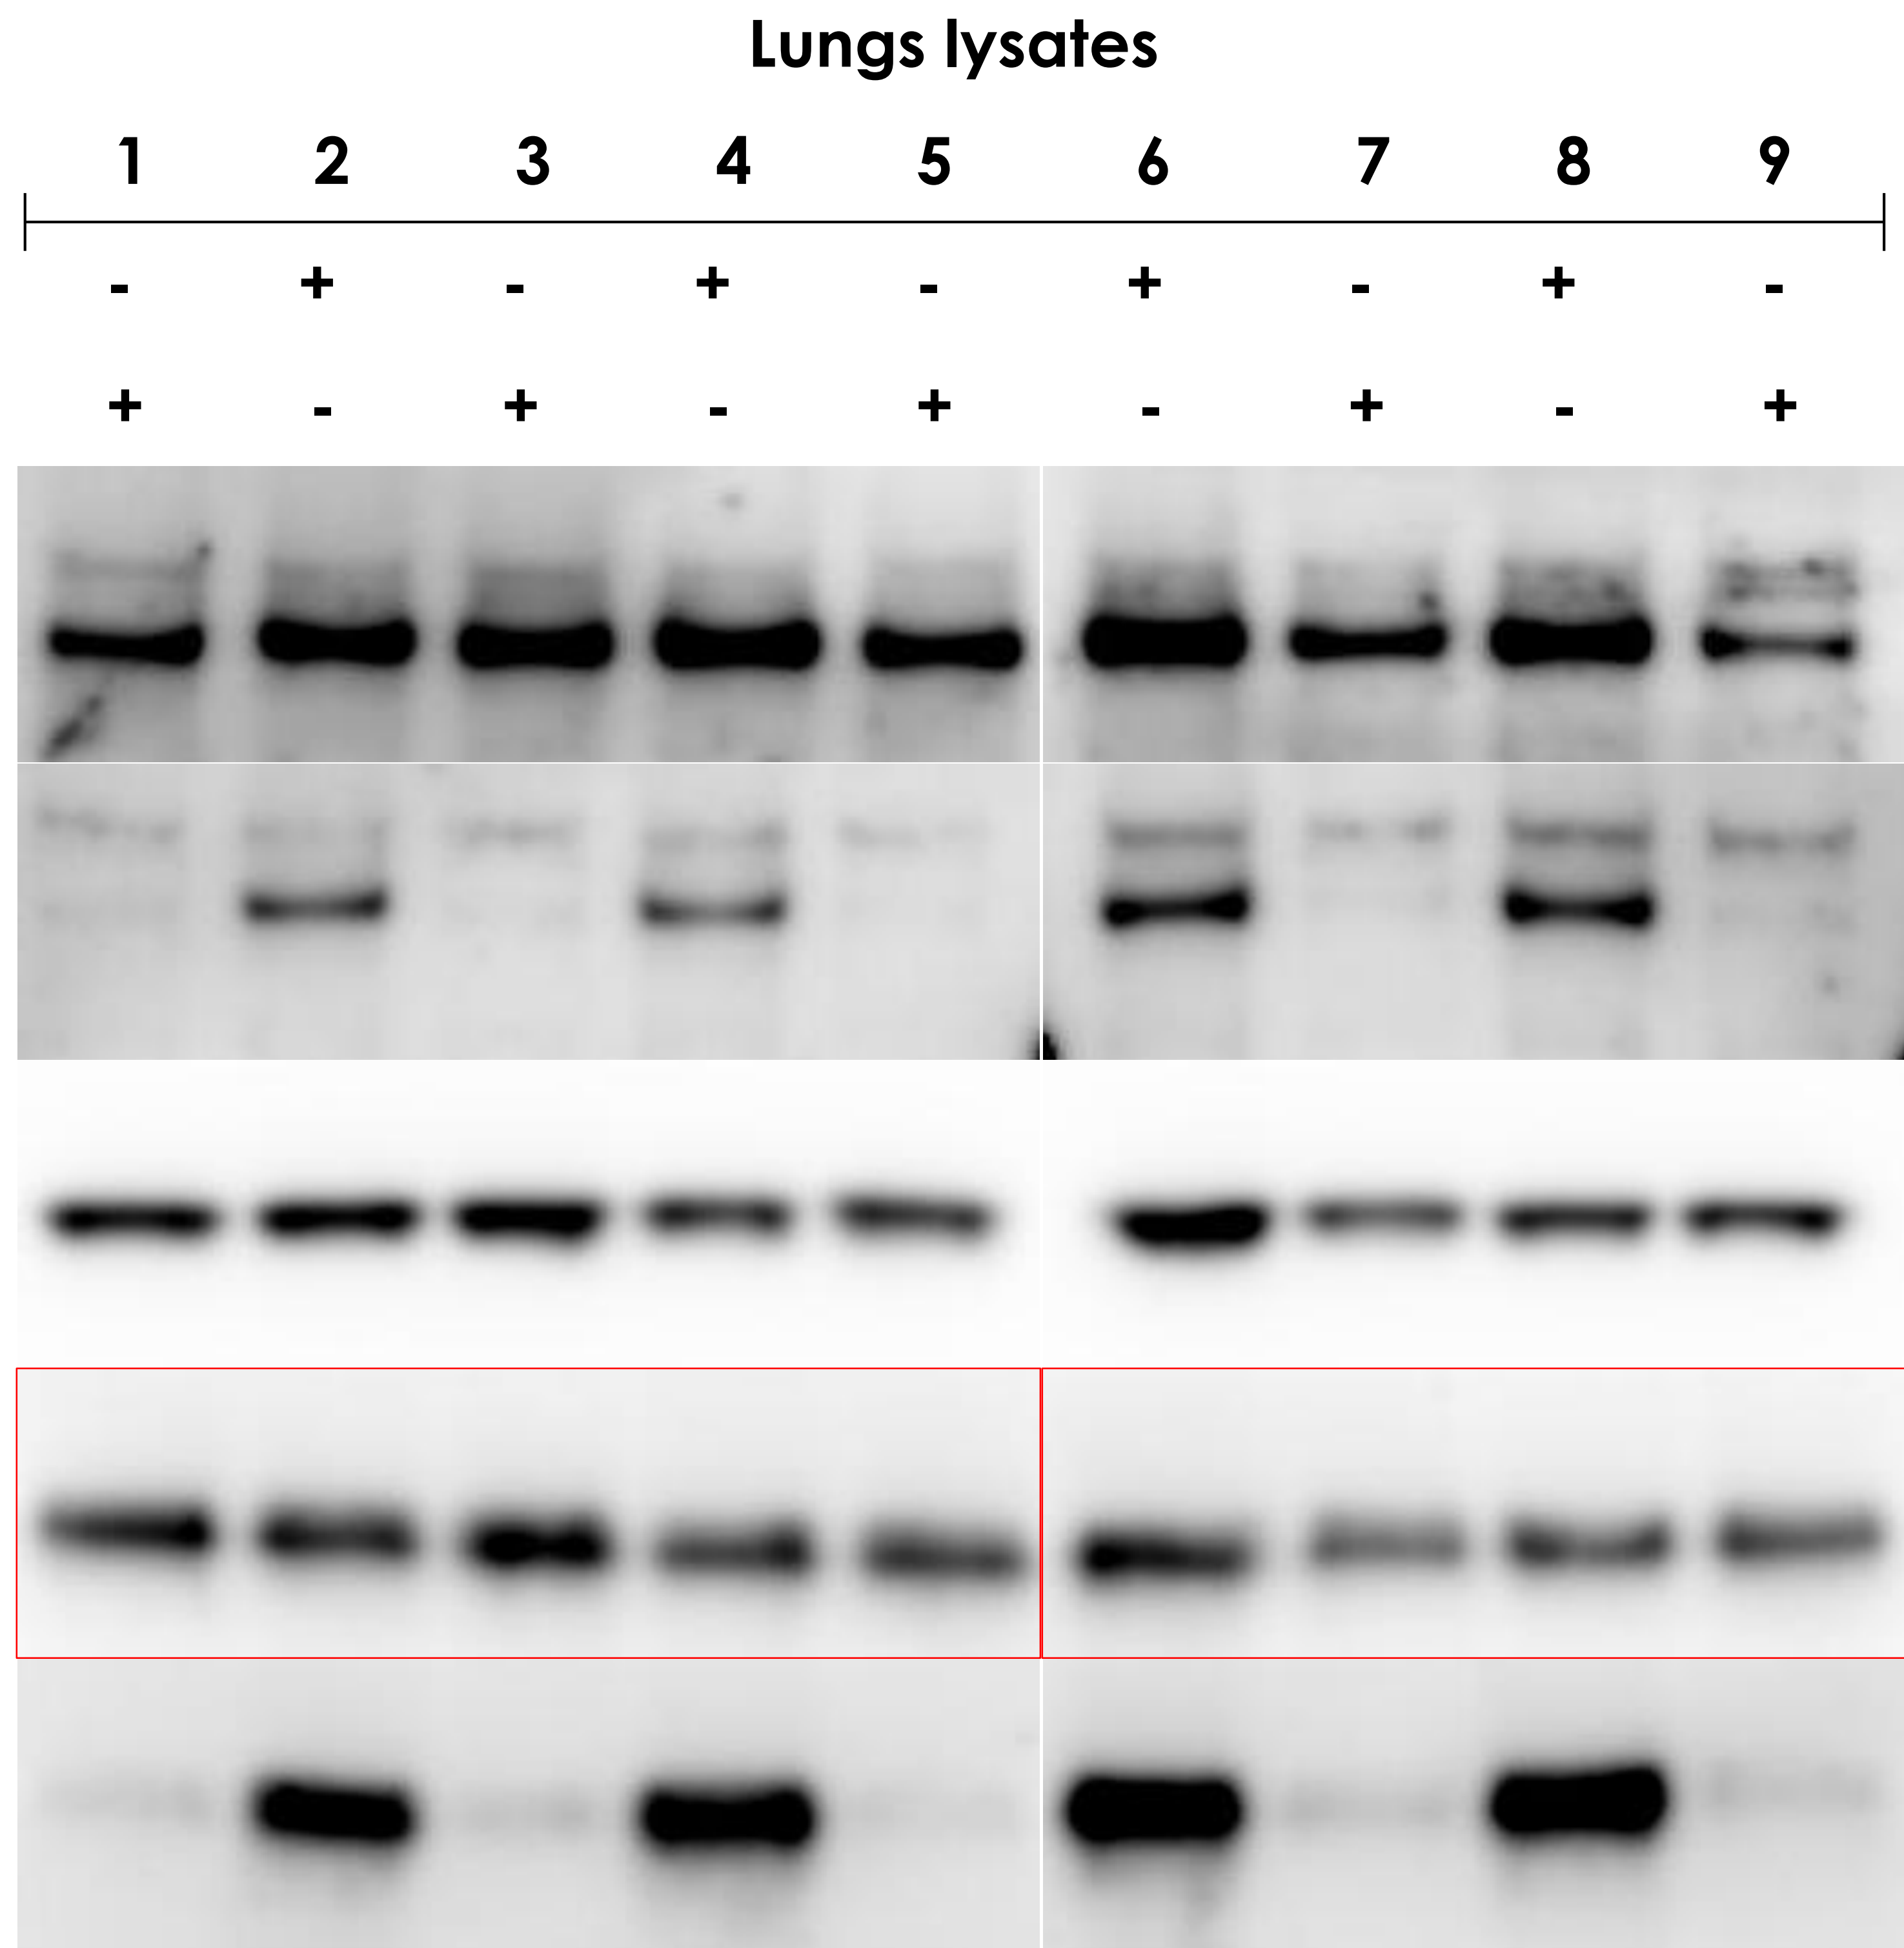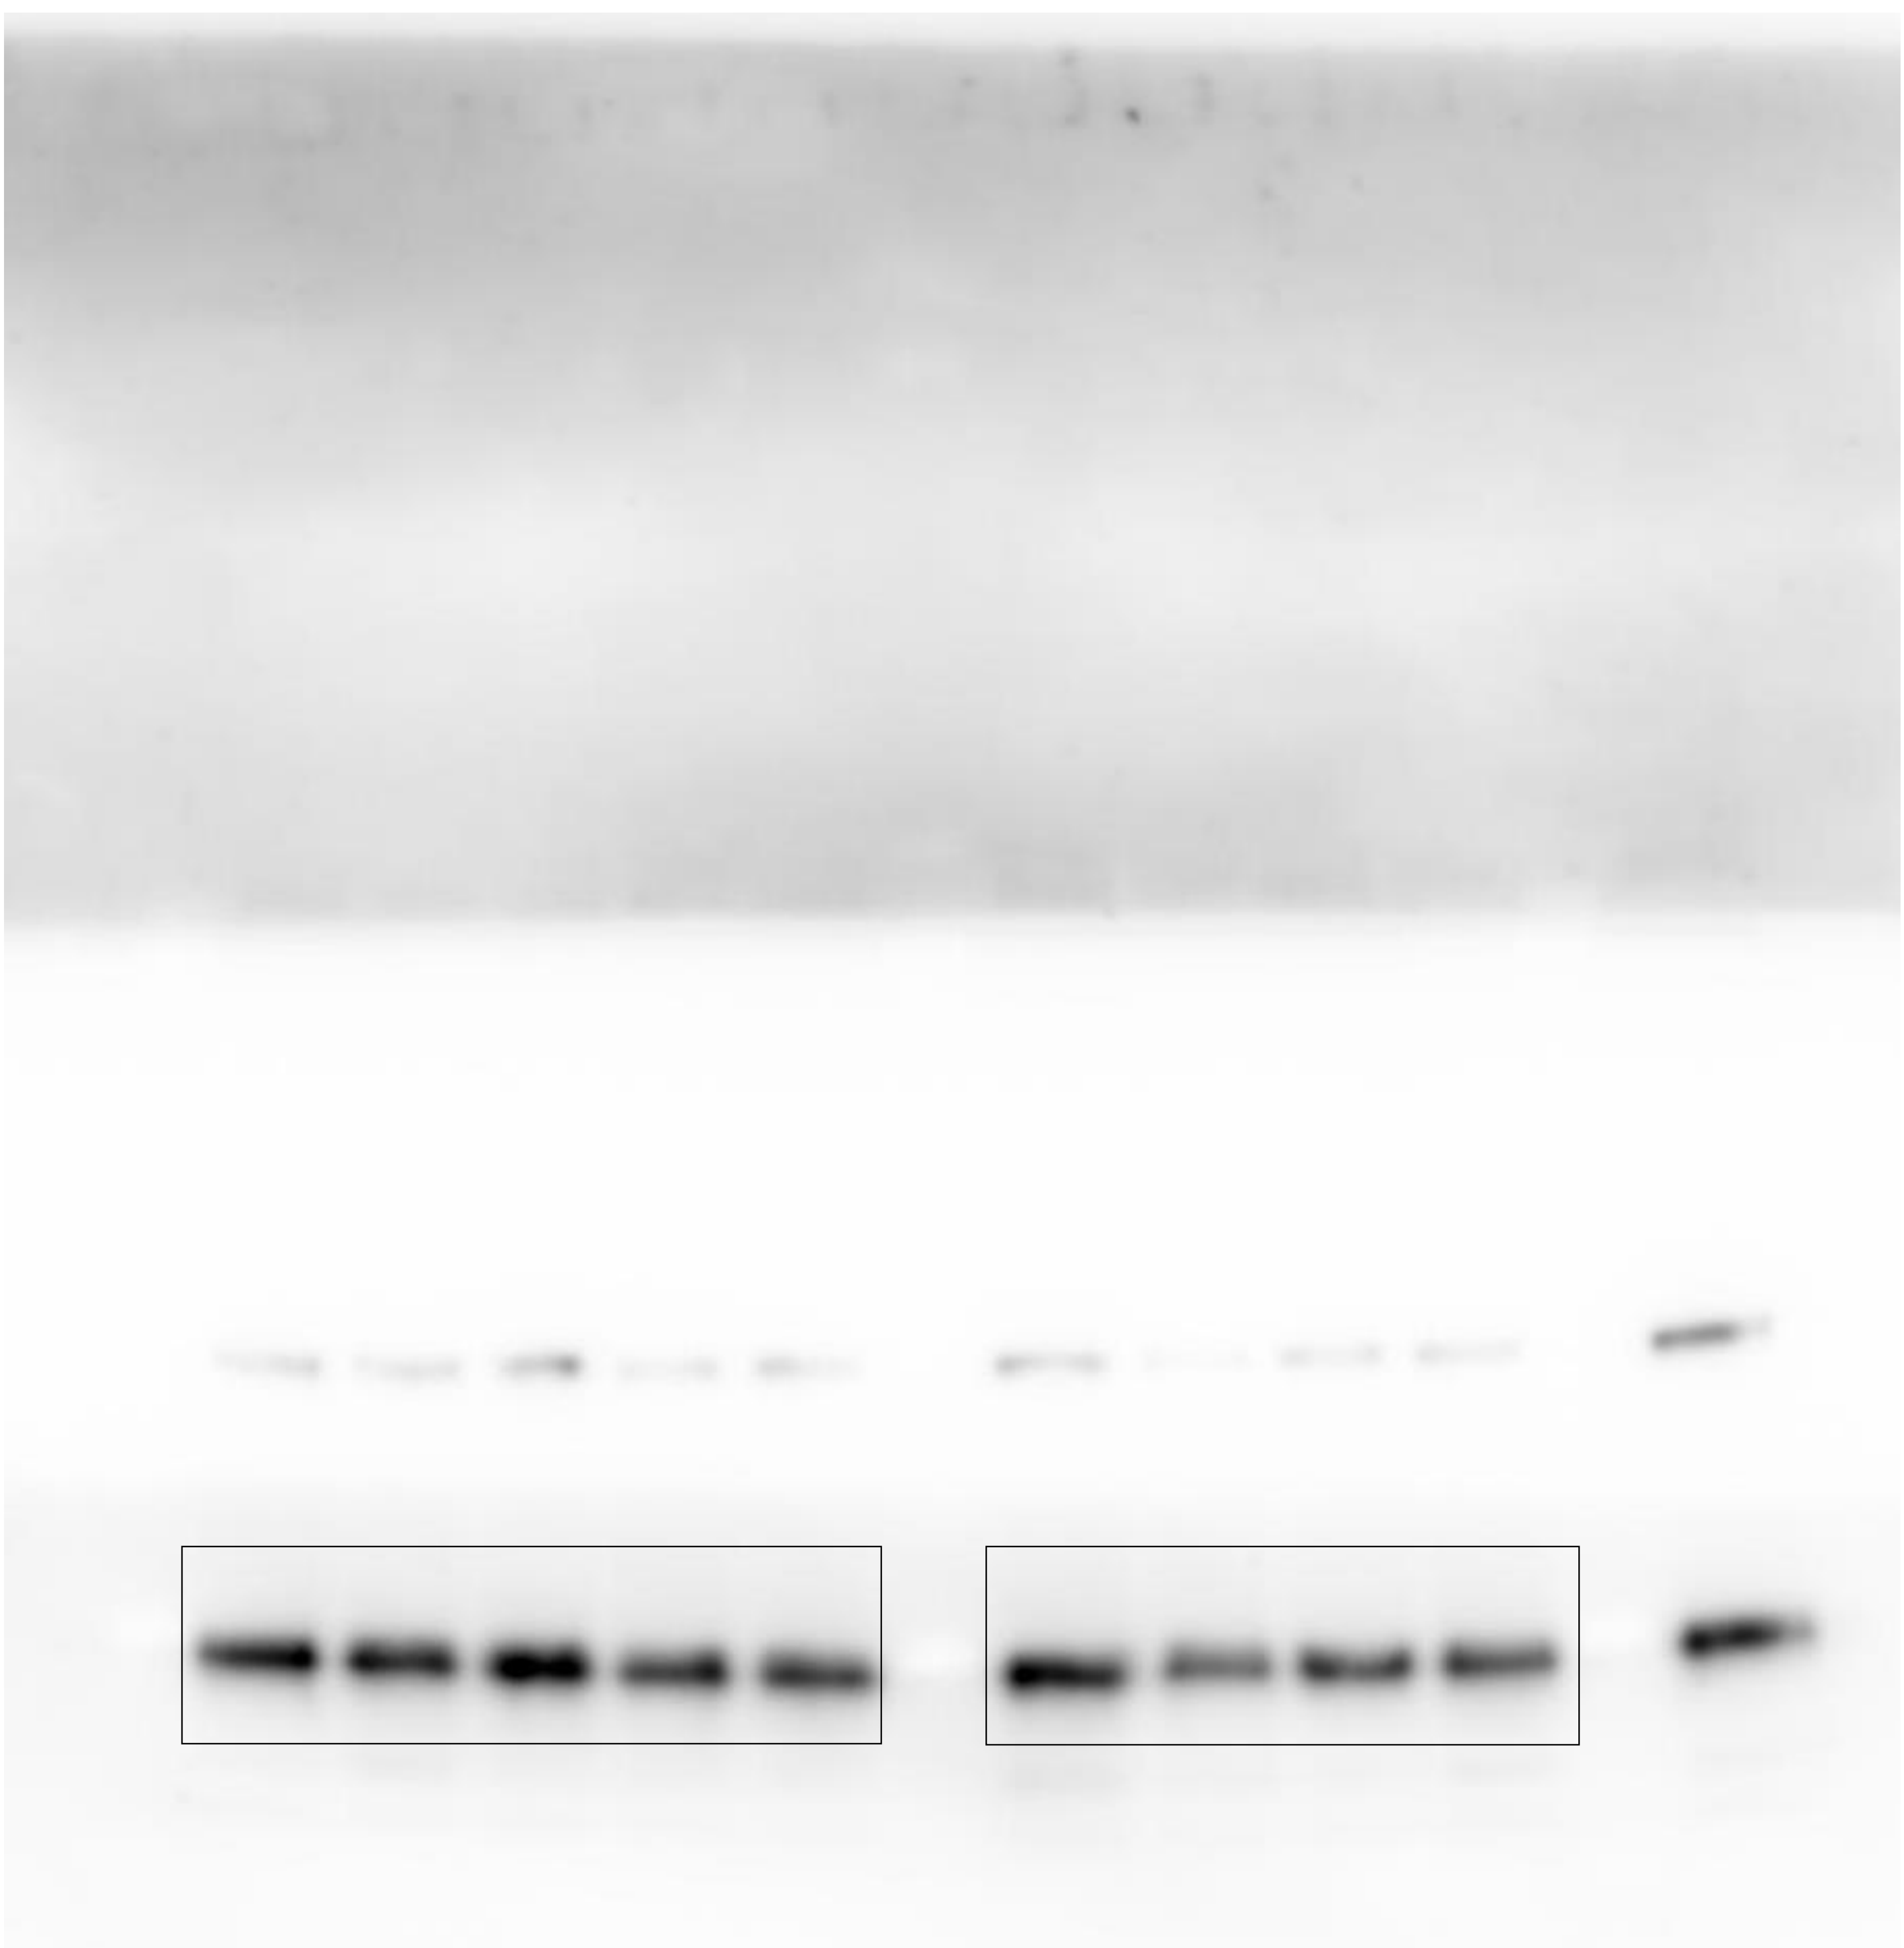

Figure 5a

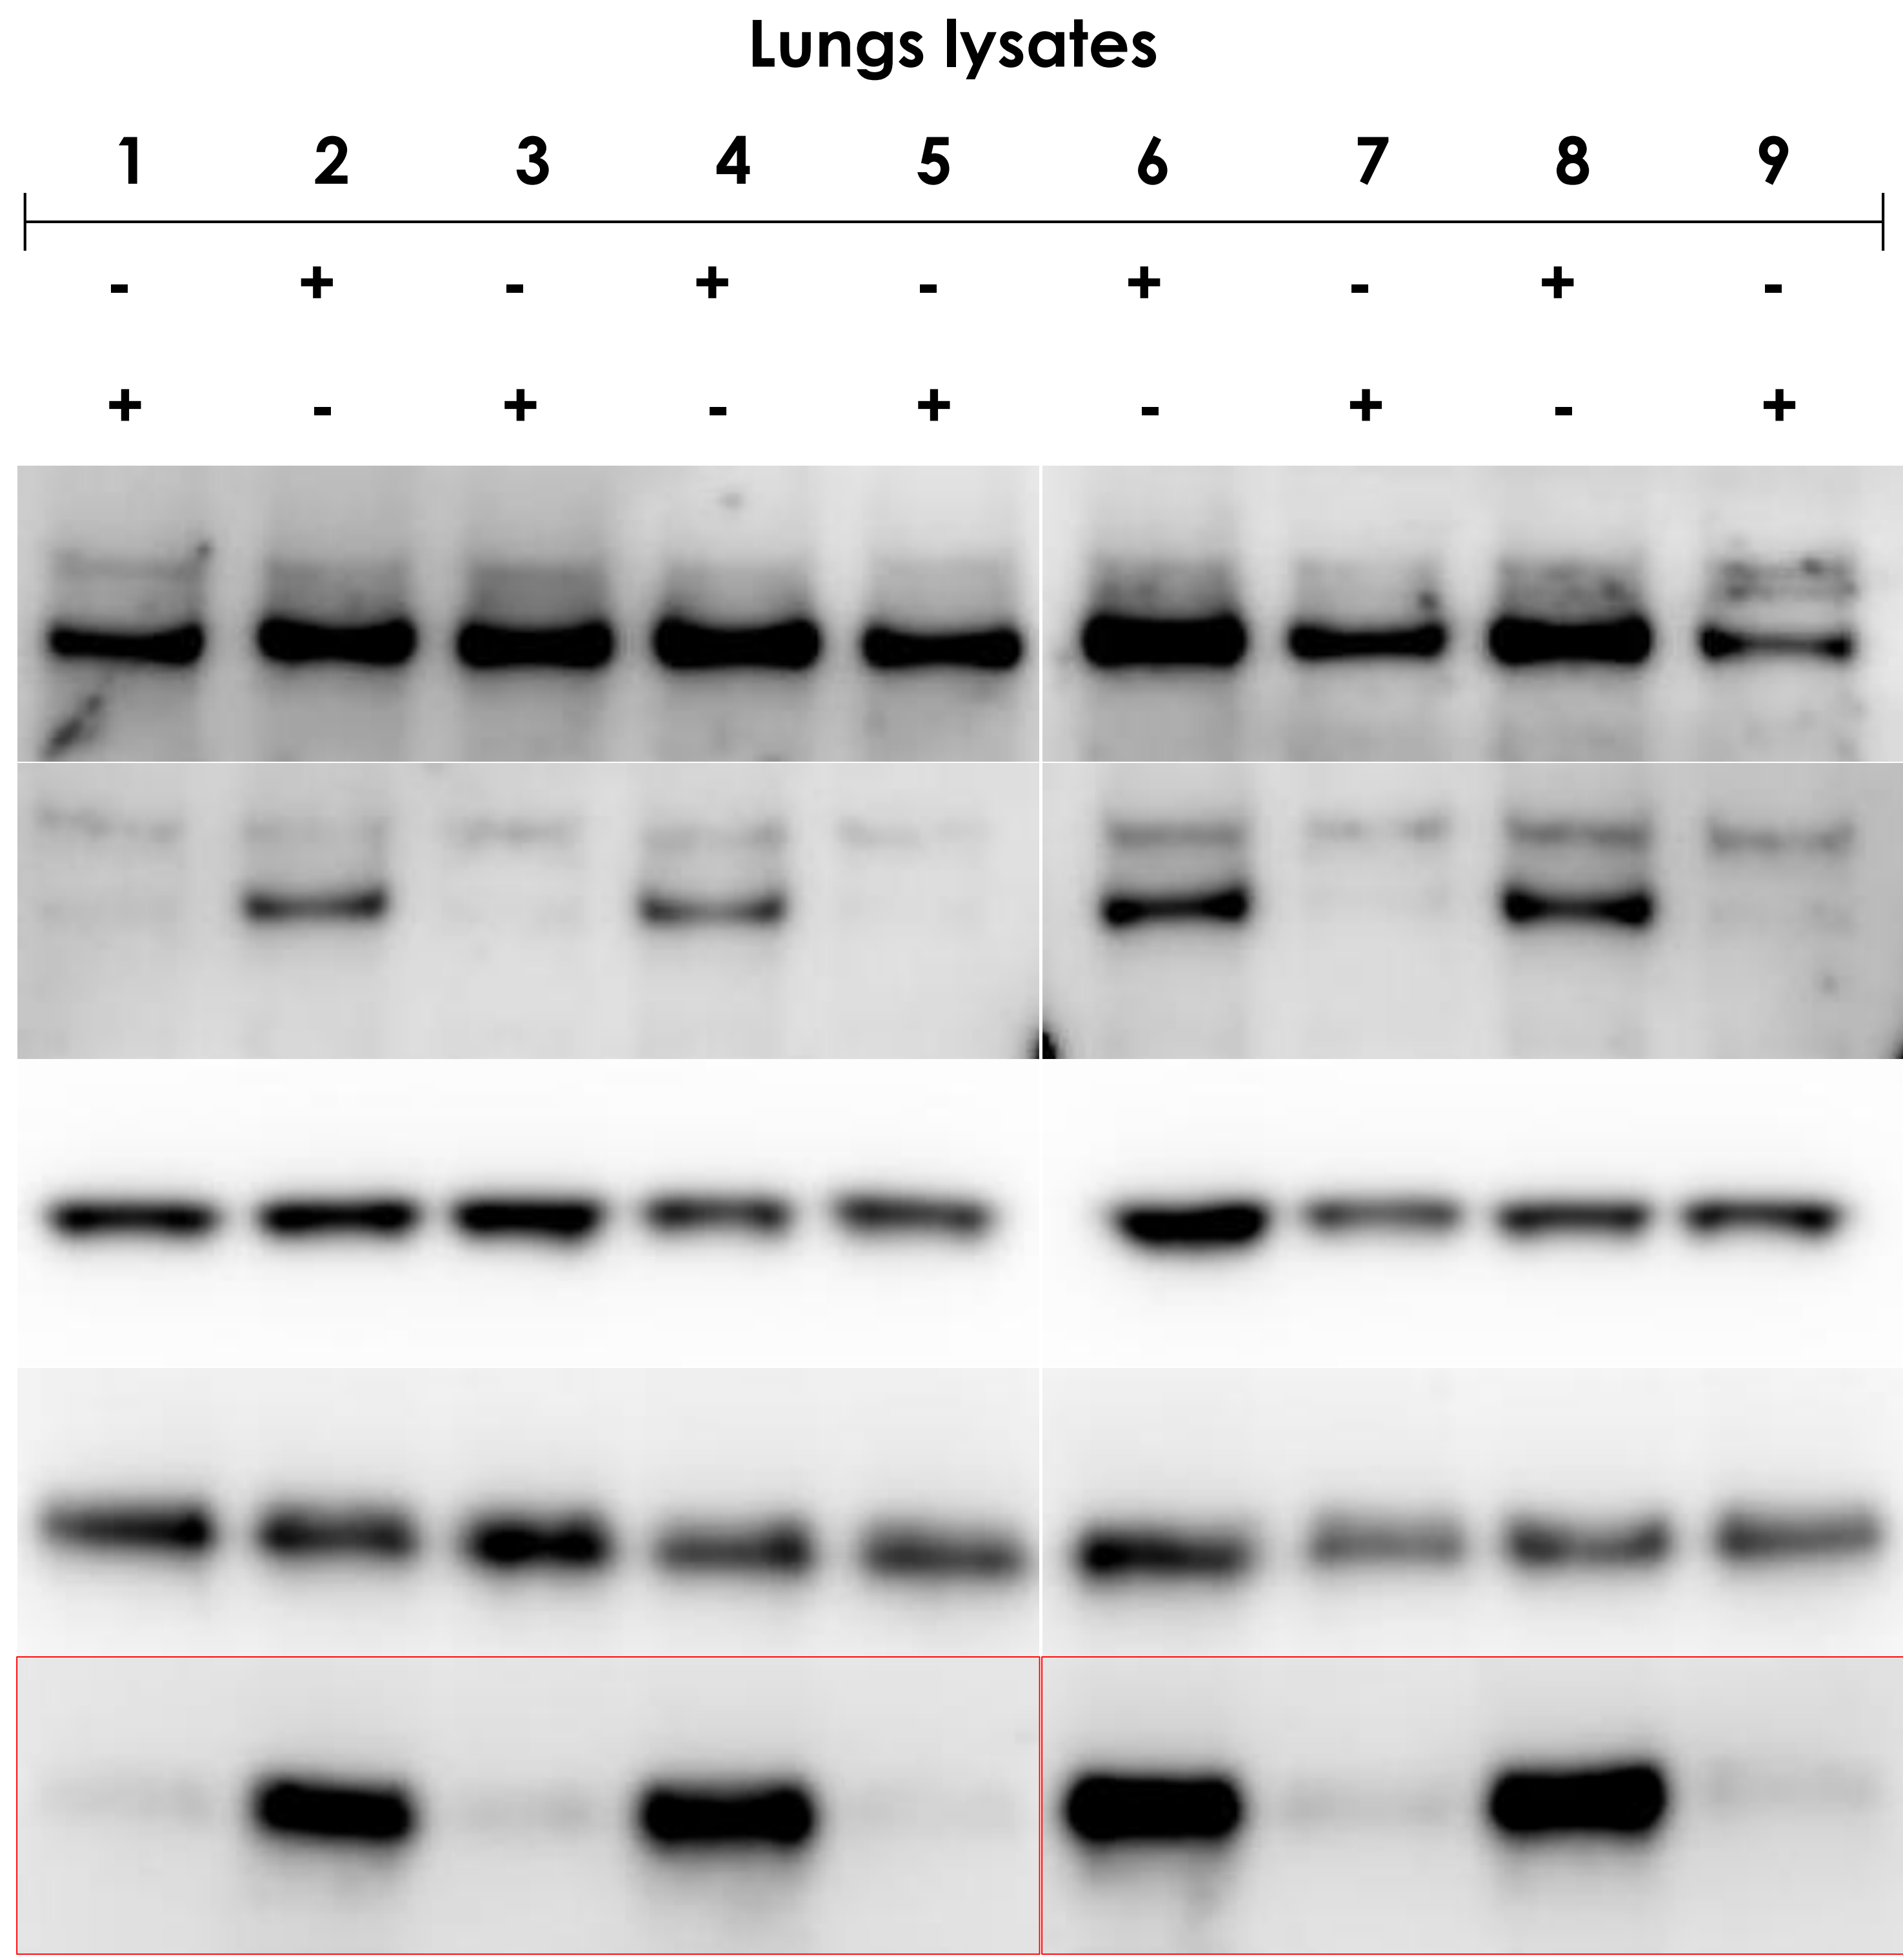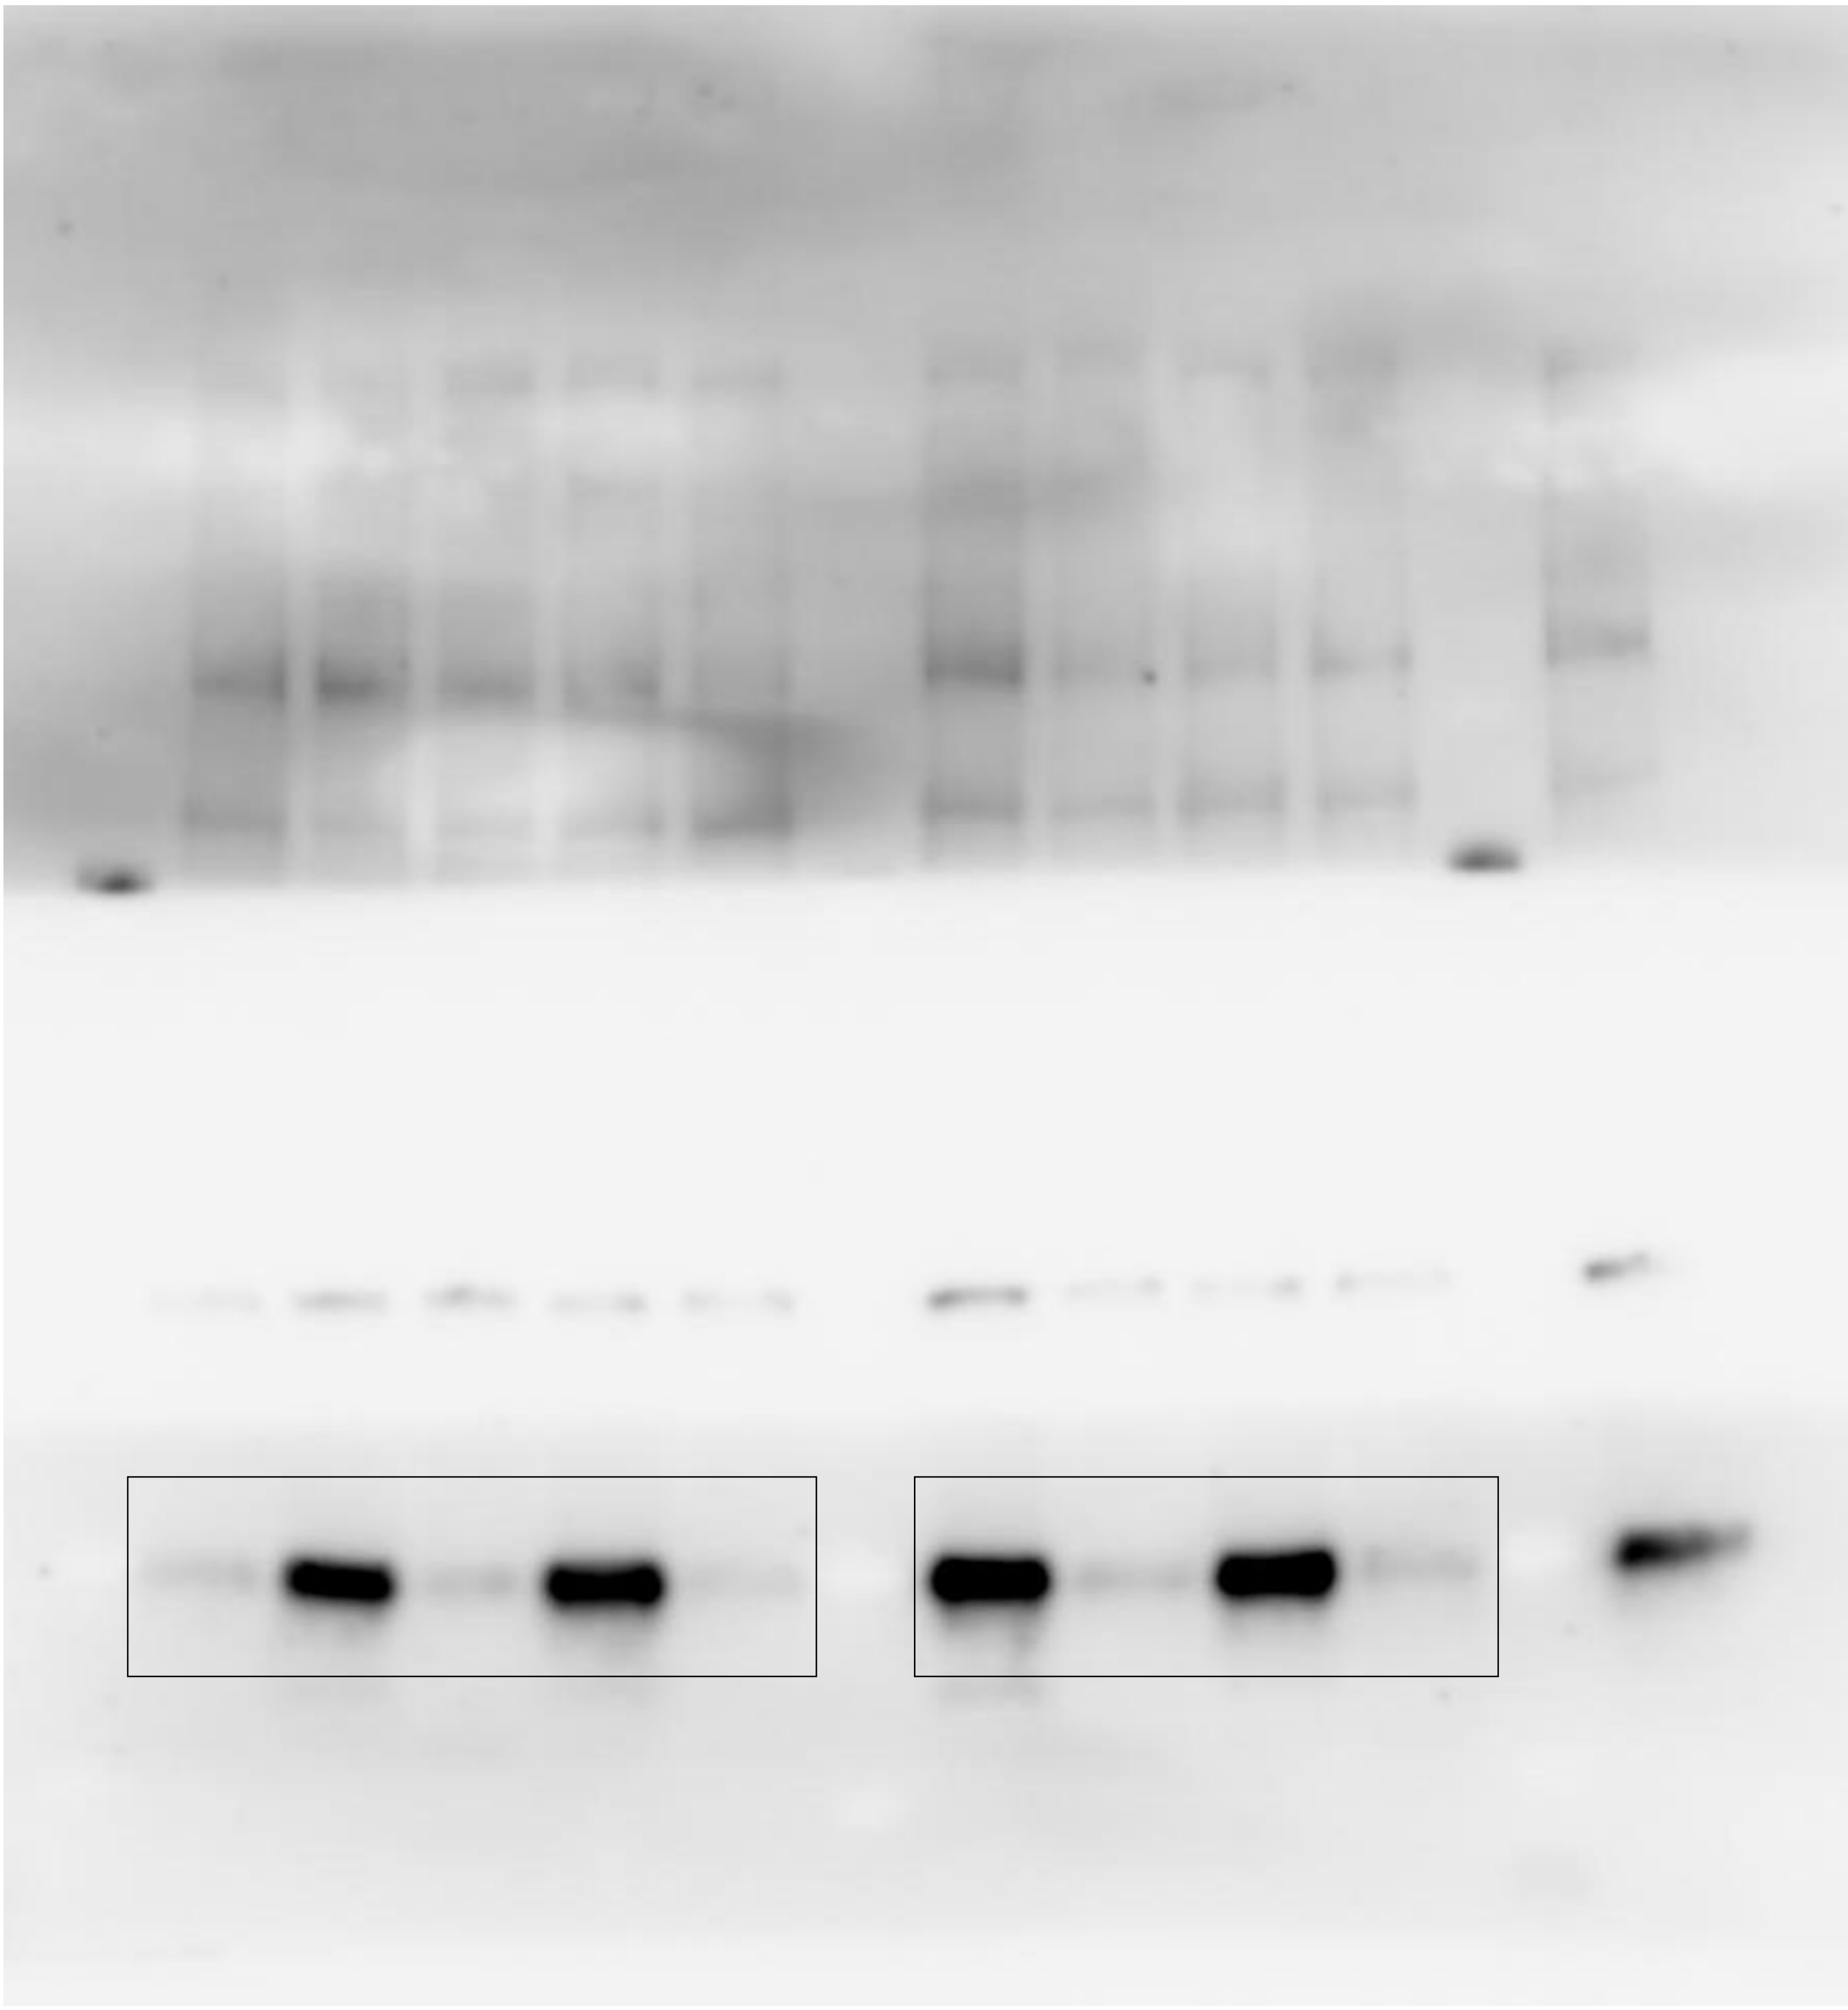

Figure 5b

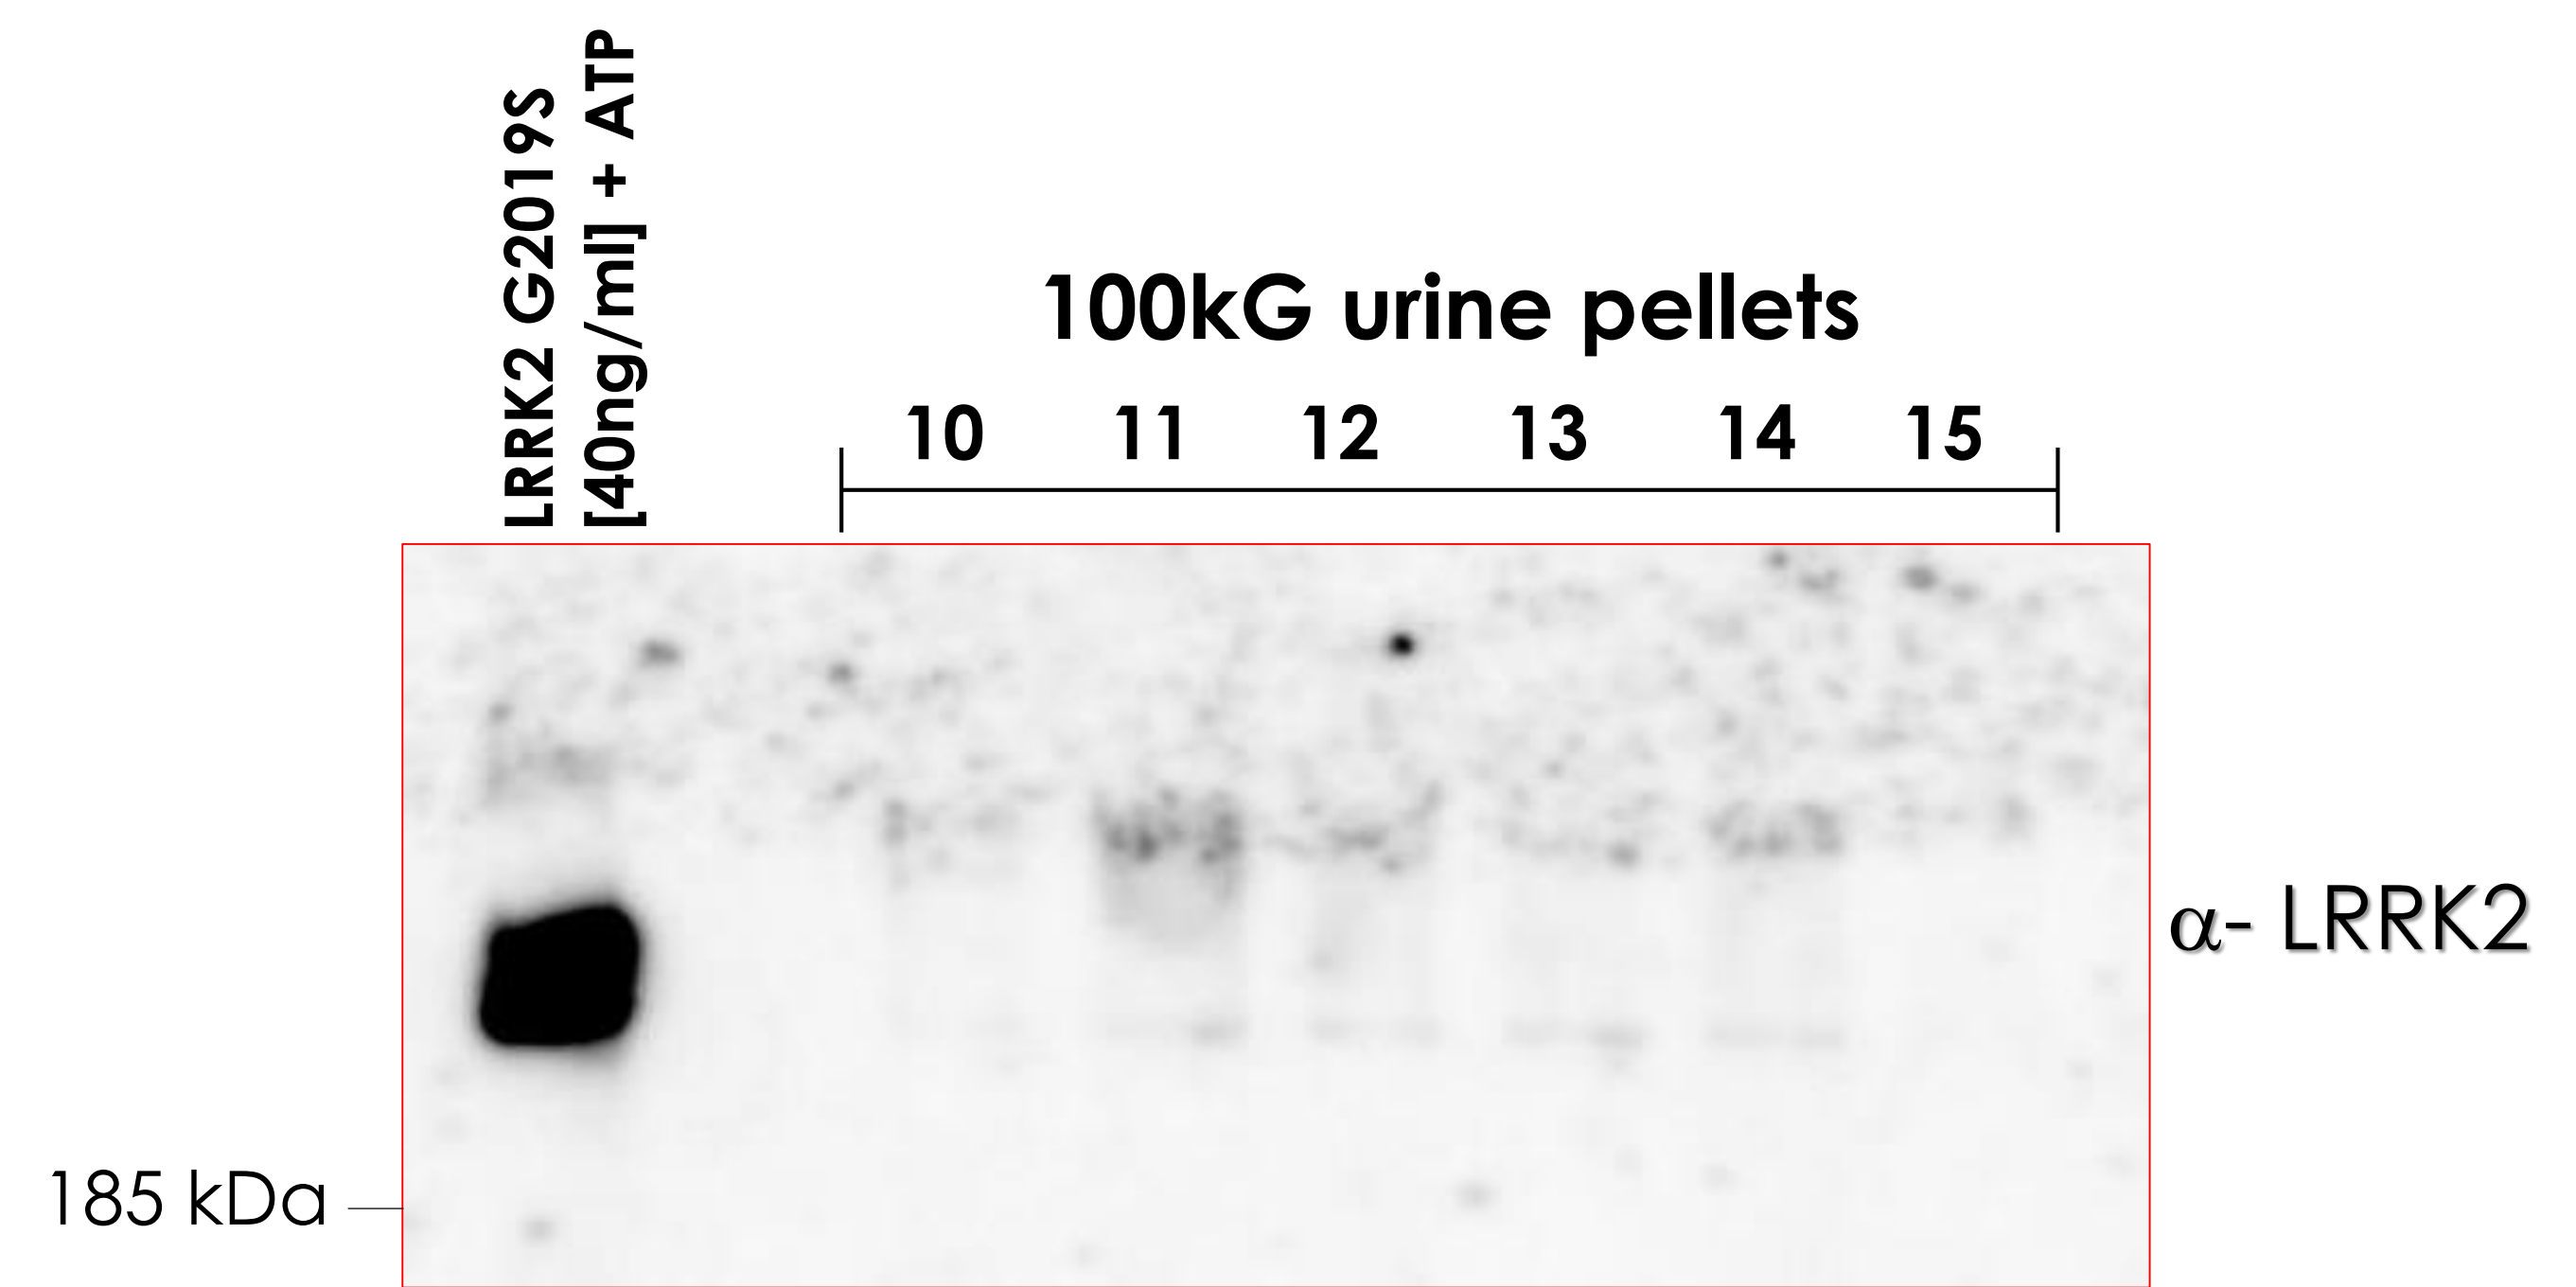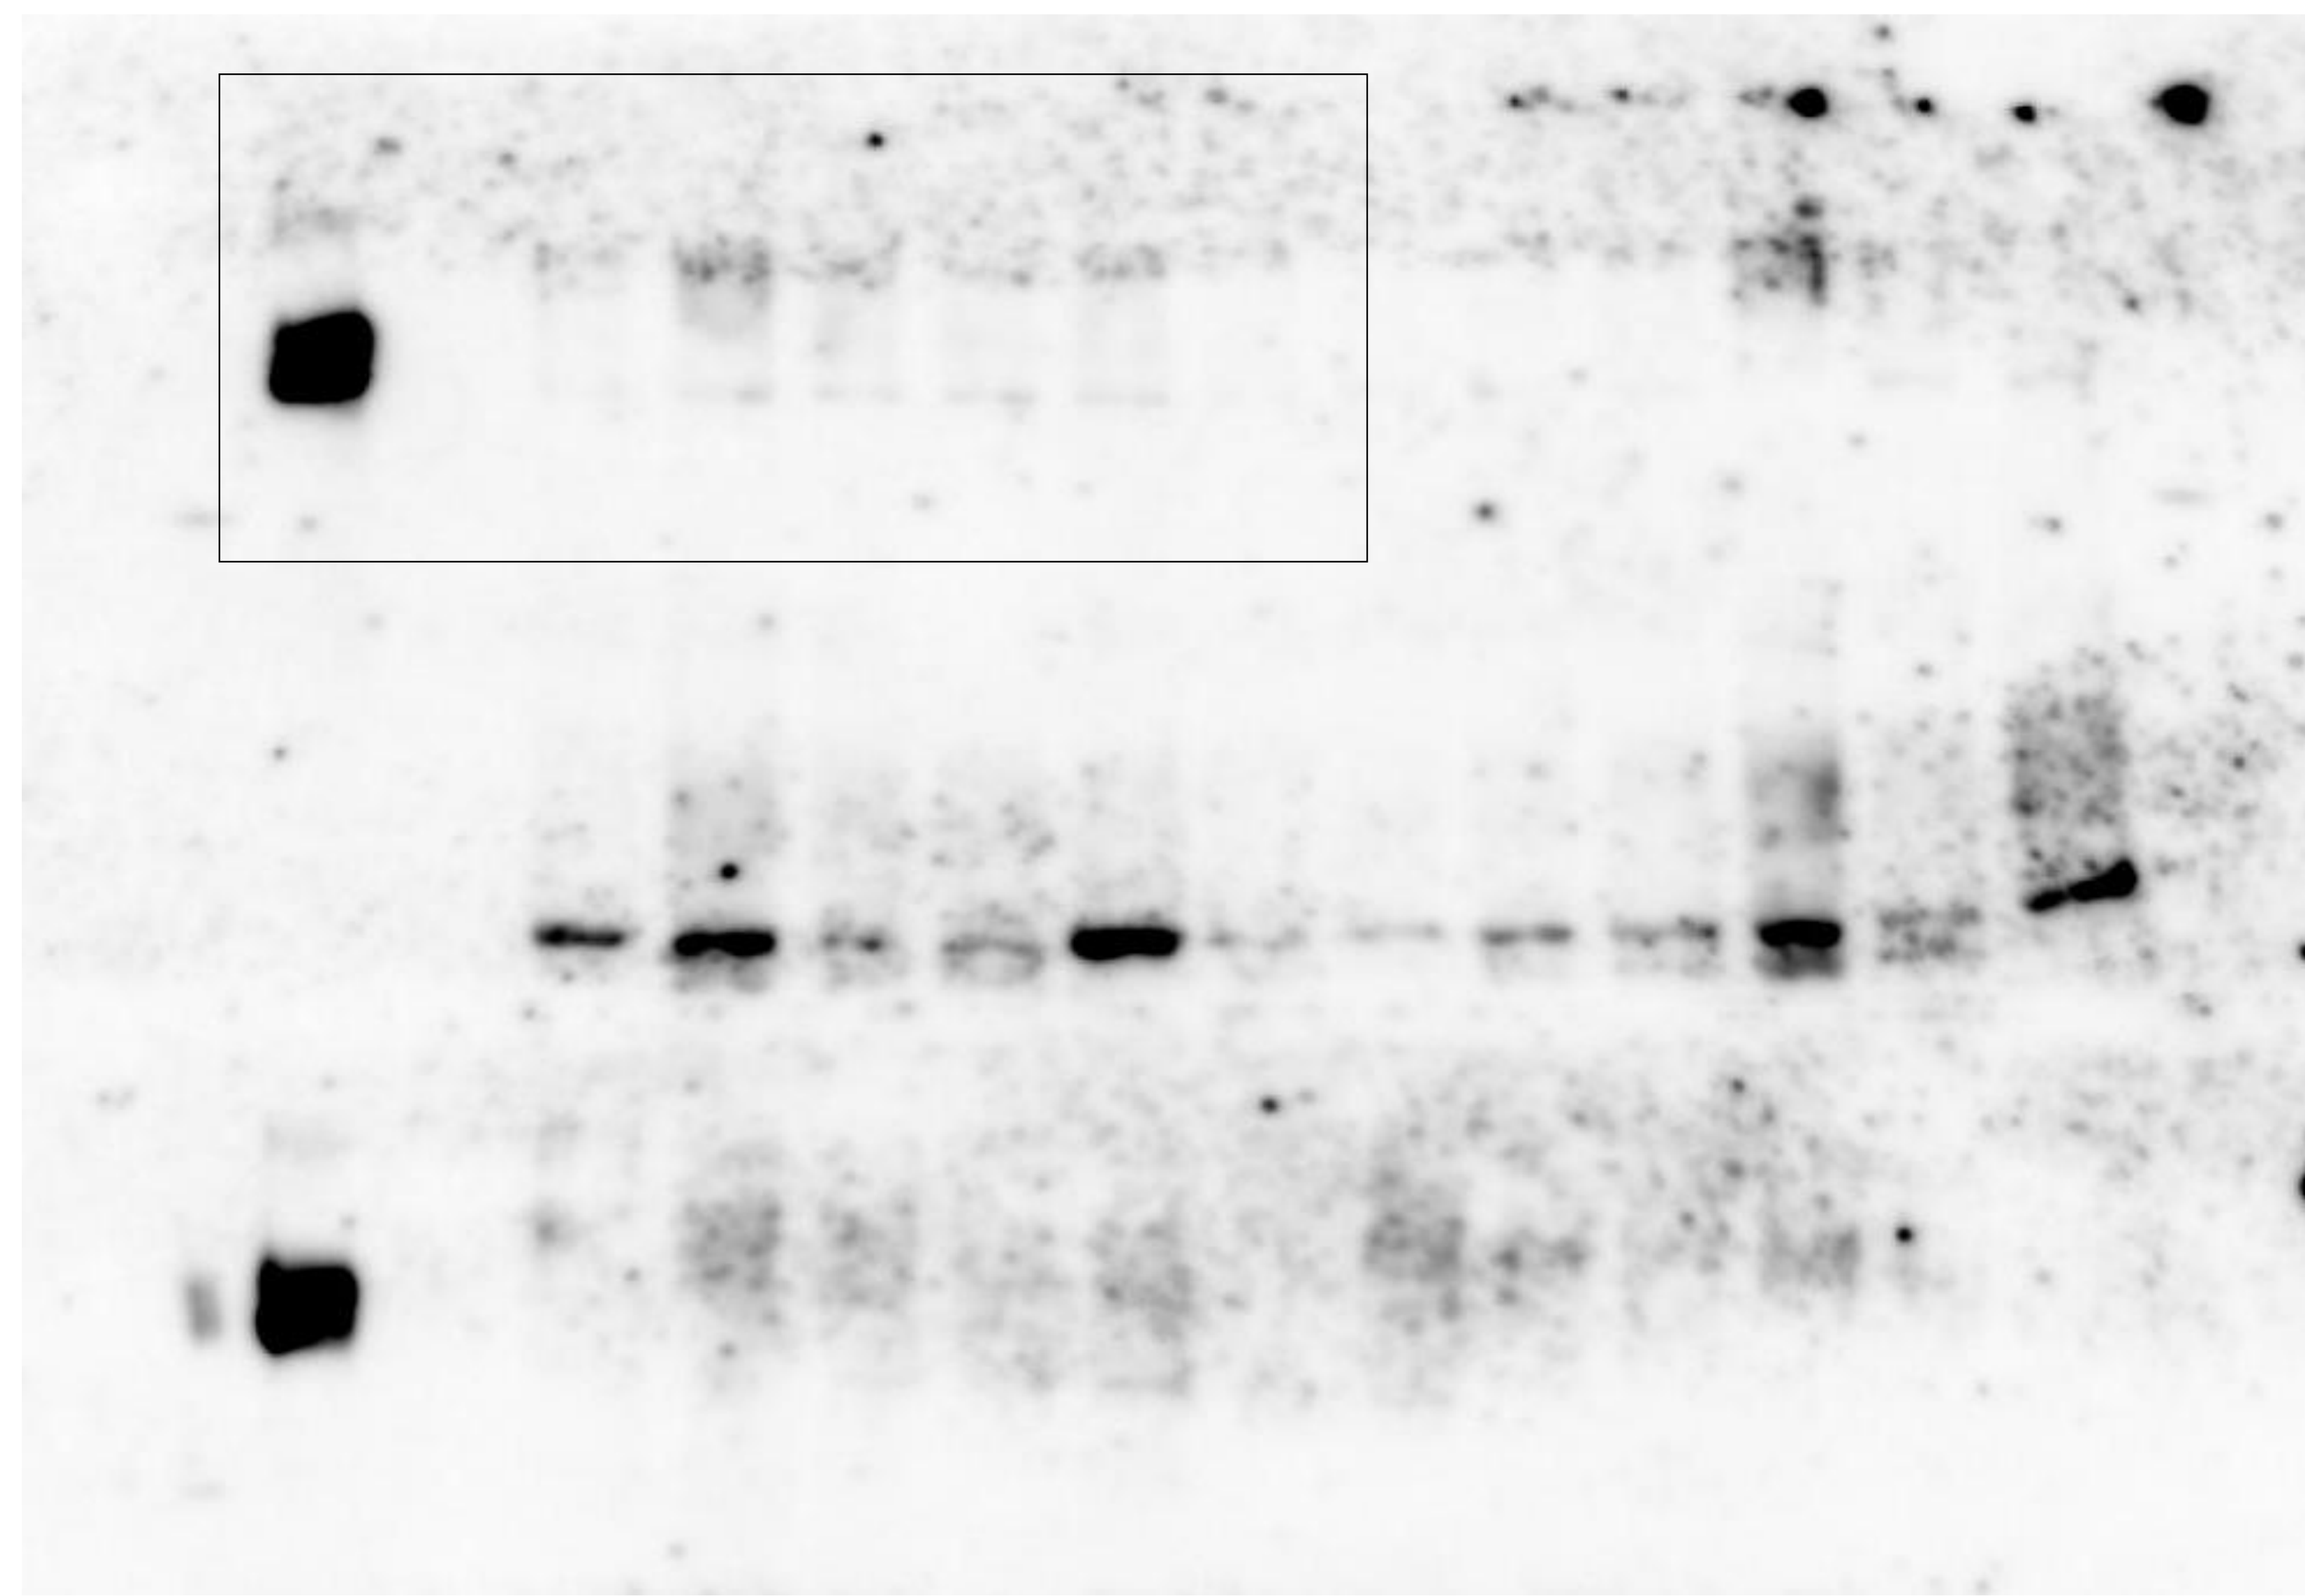

Figure 5c

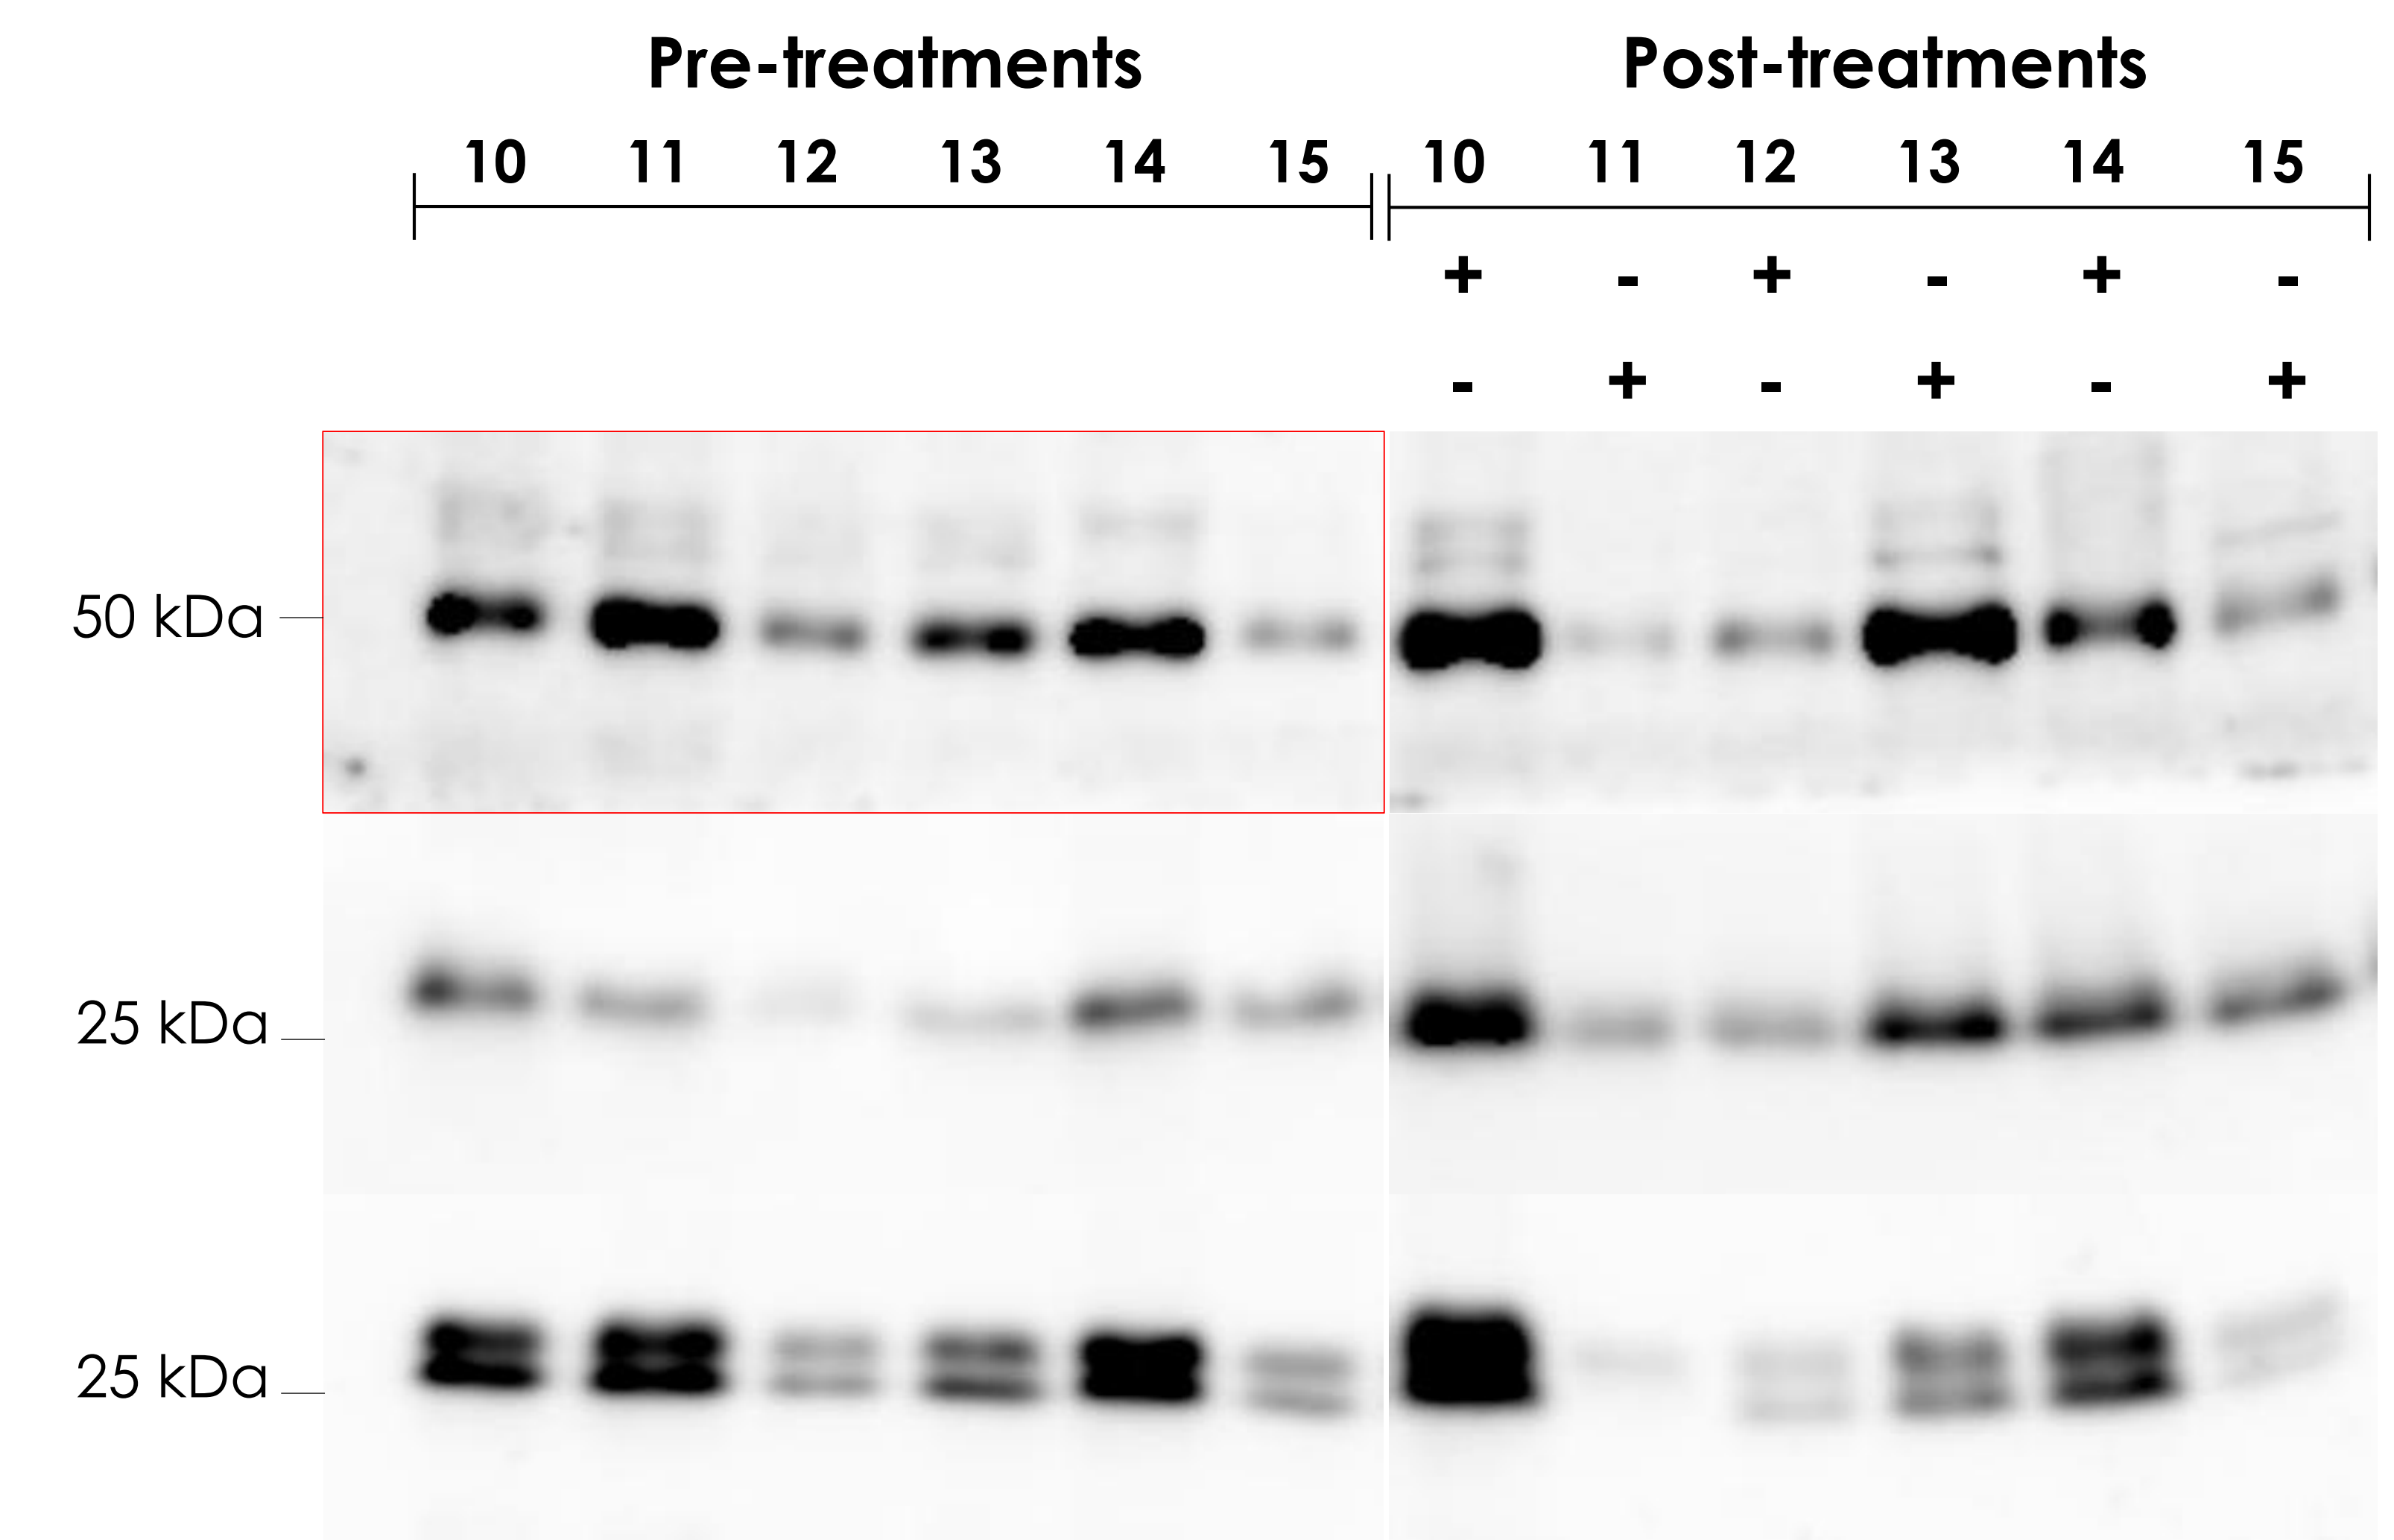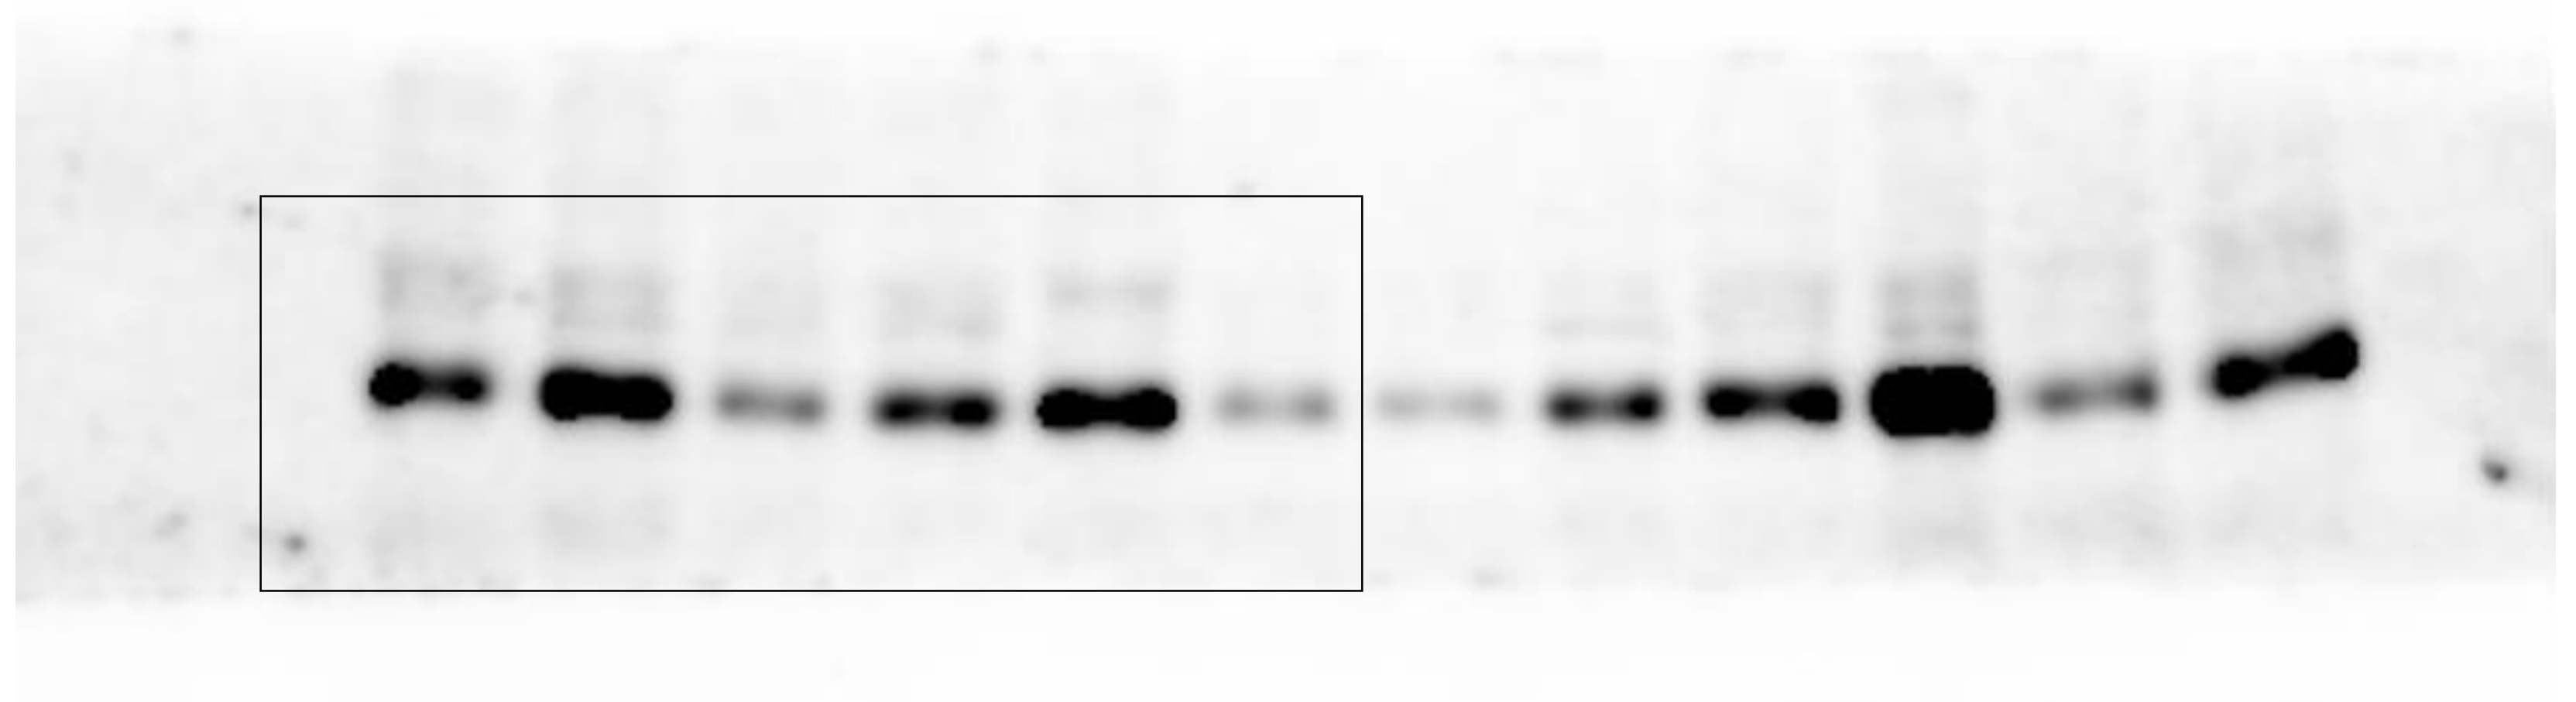

Figure 5c

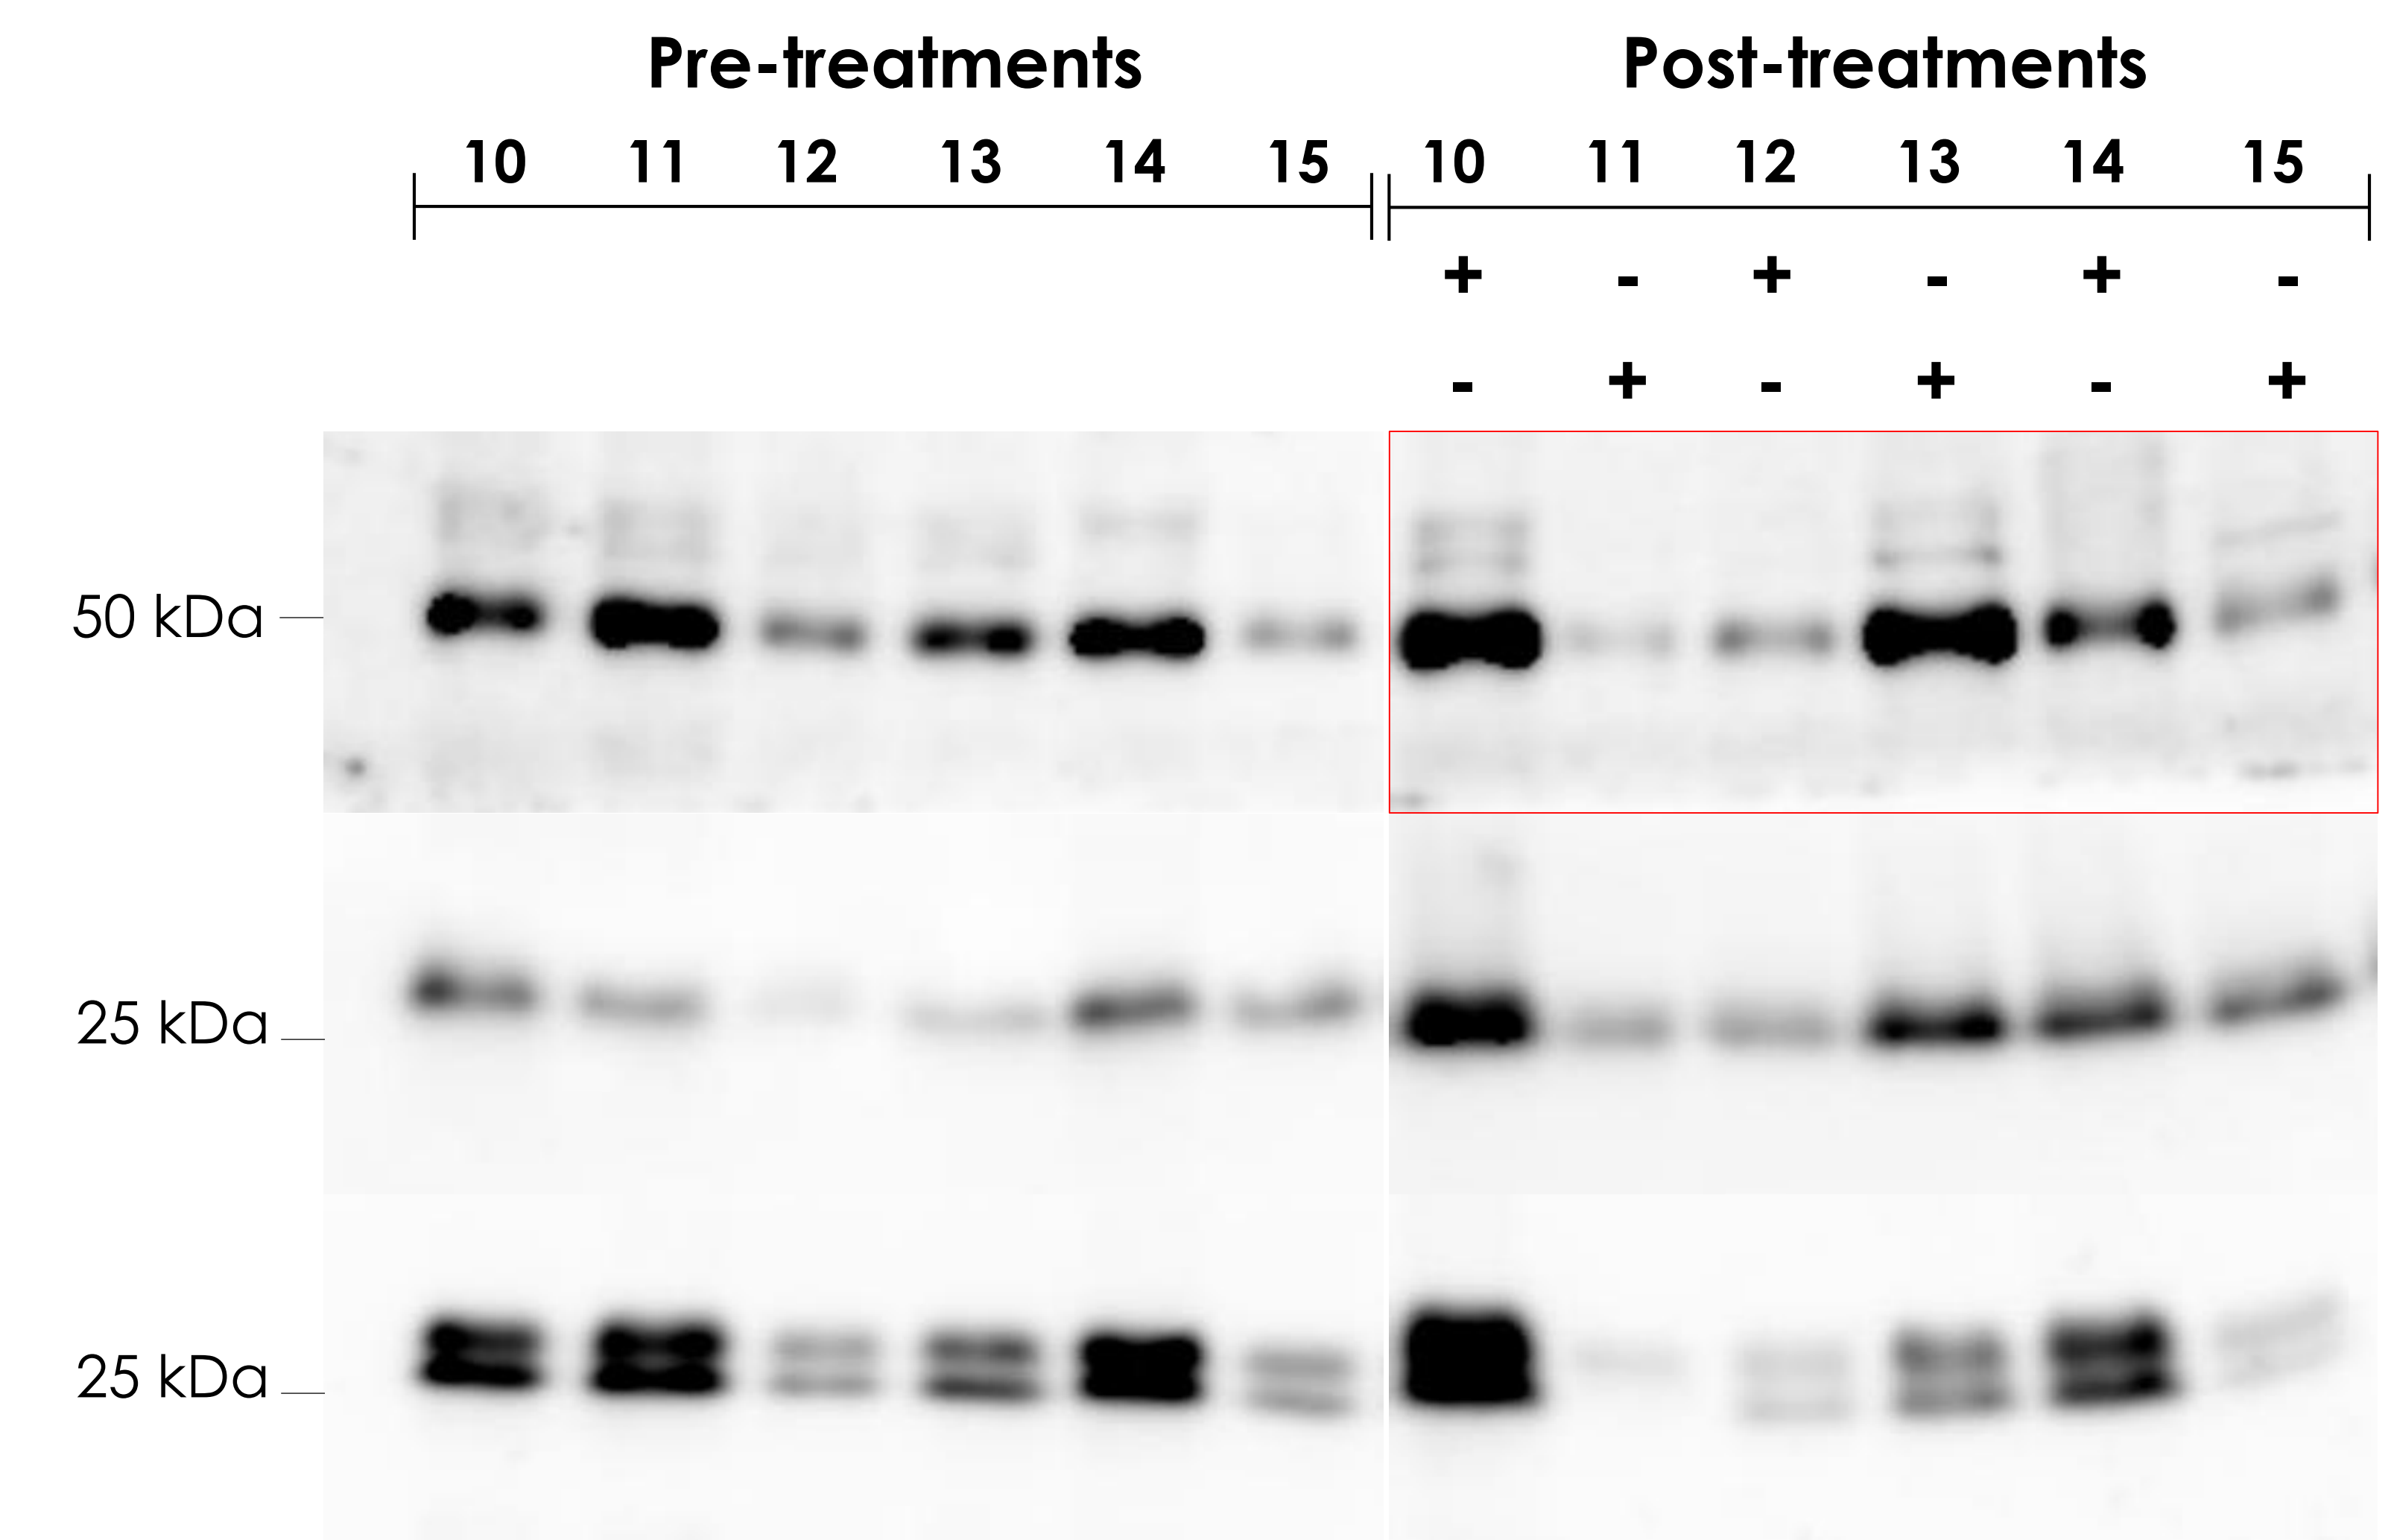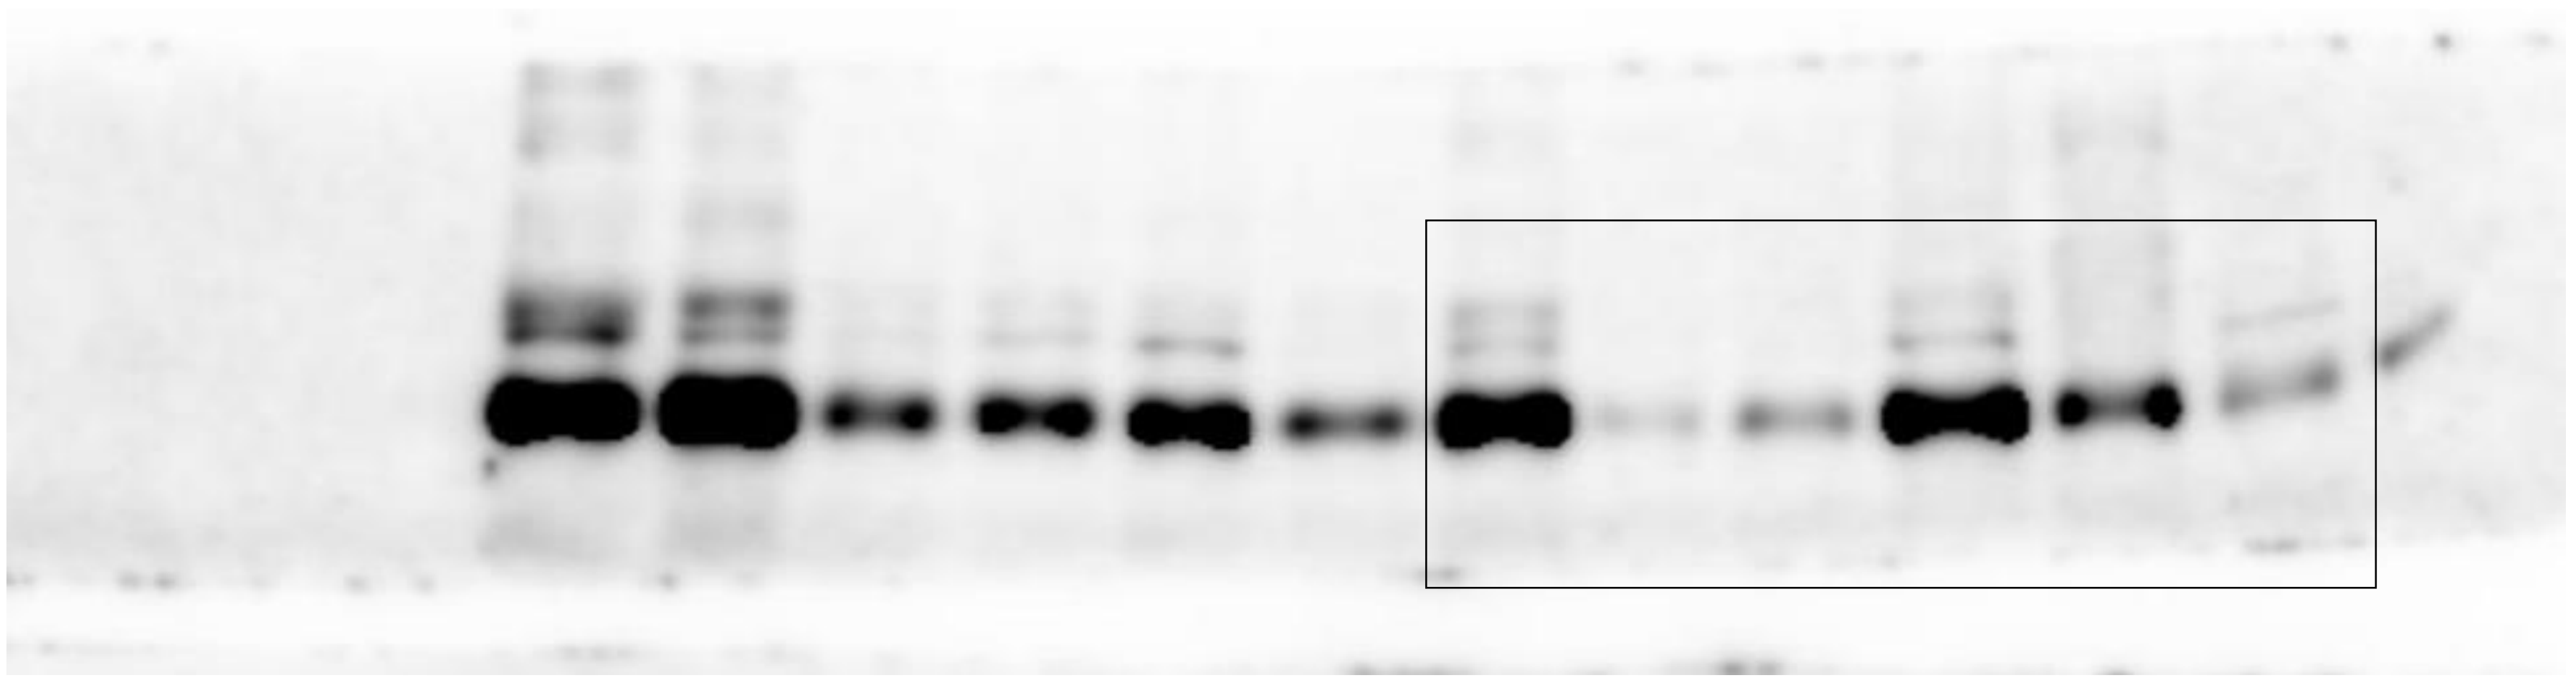

Figure 5c

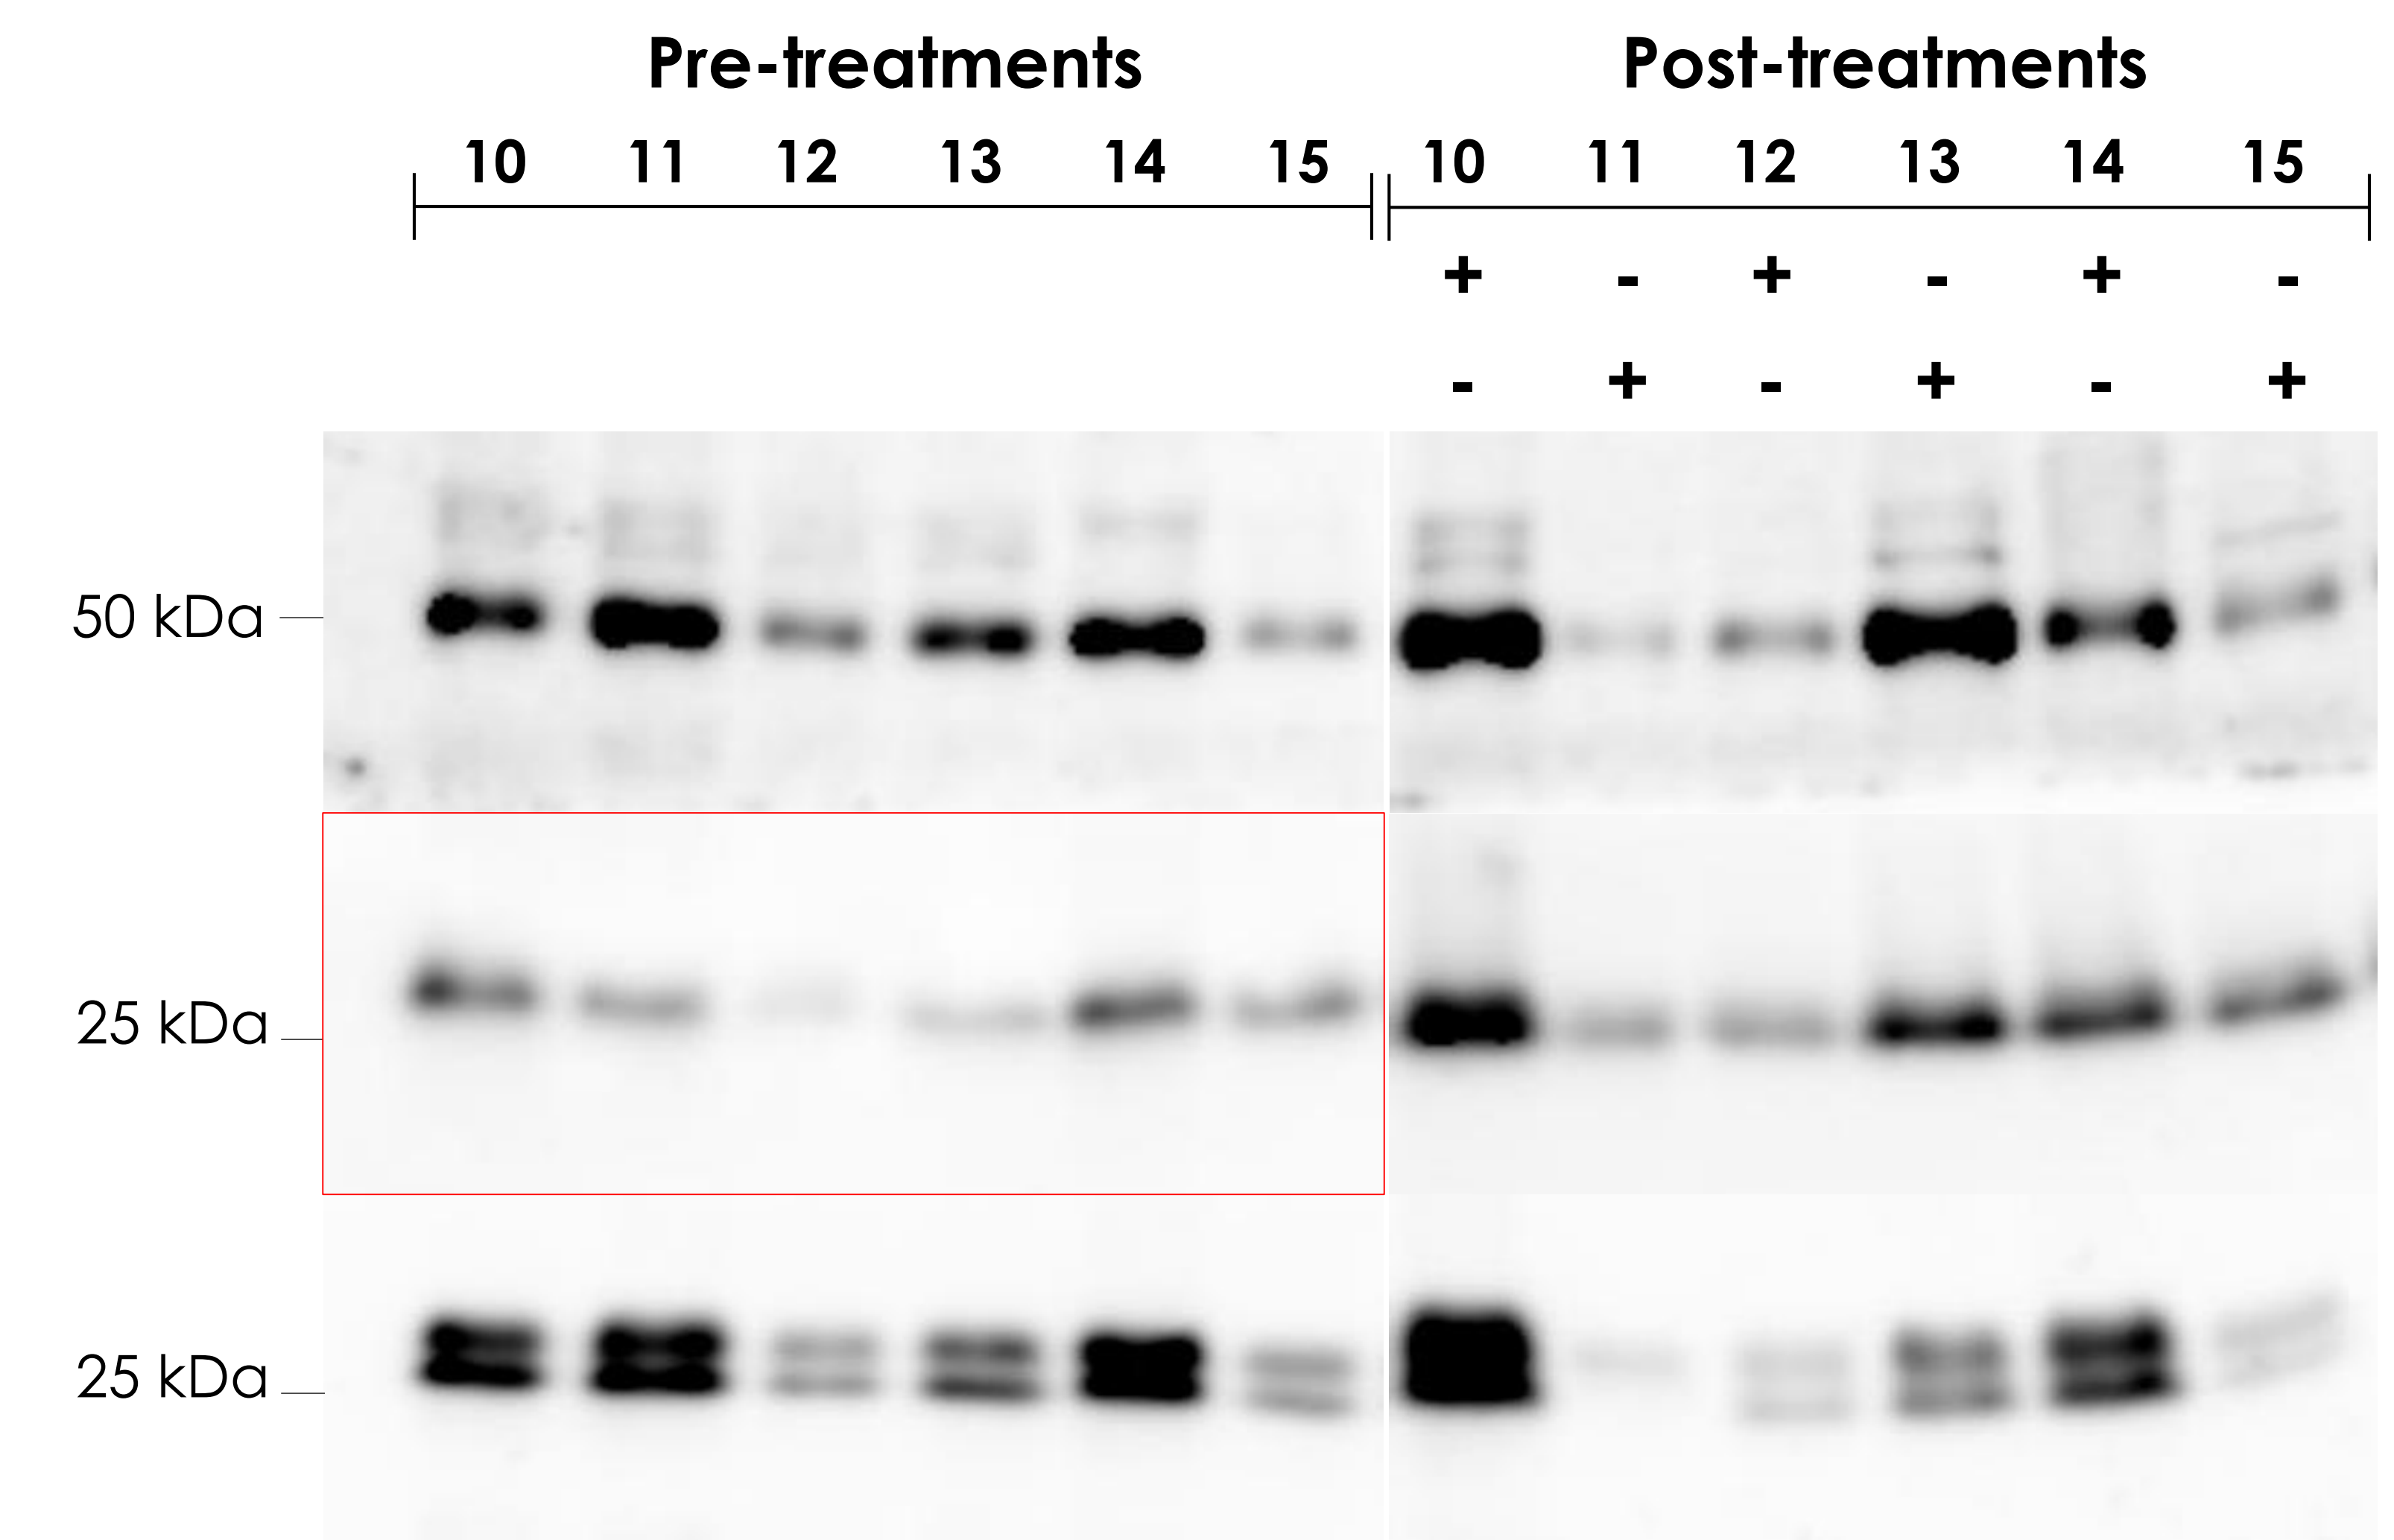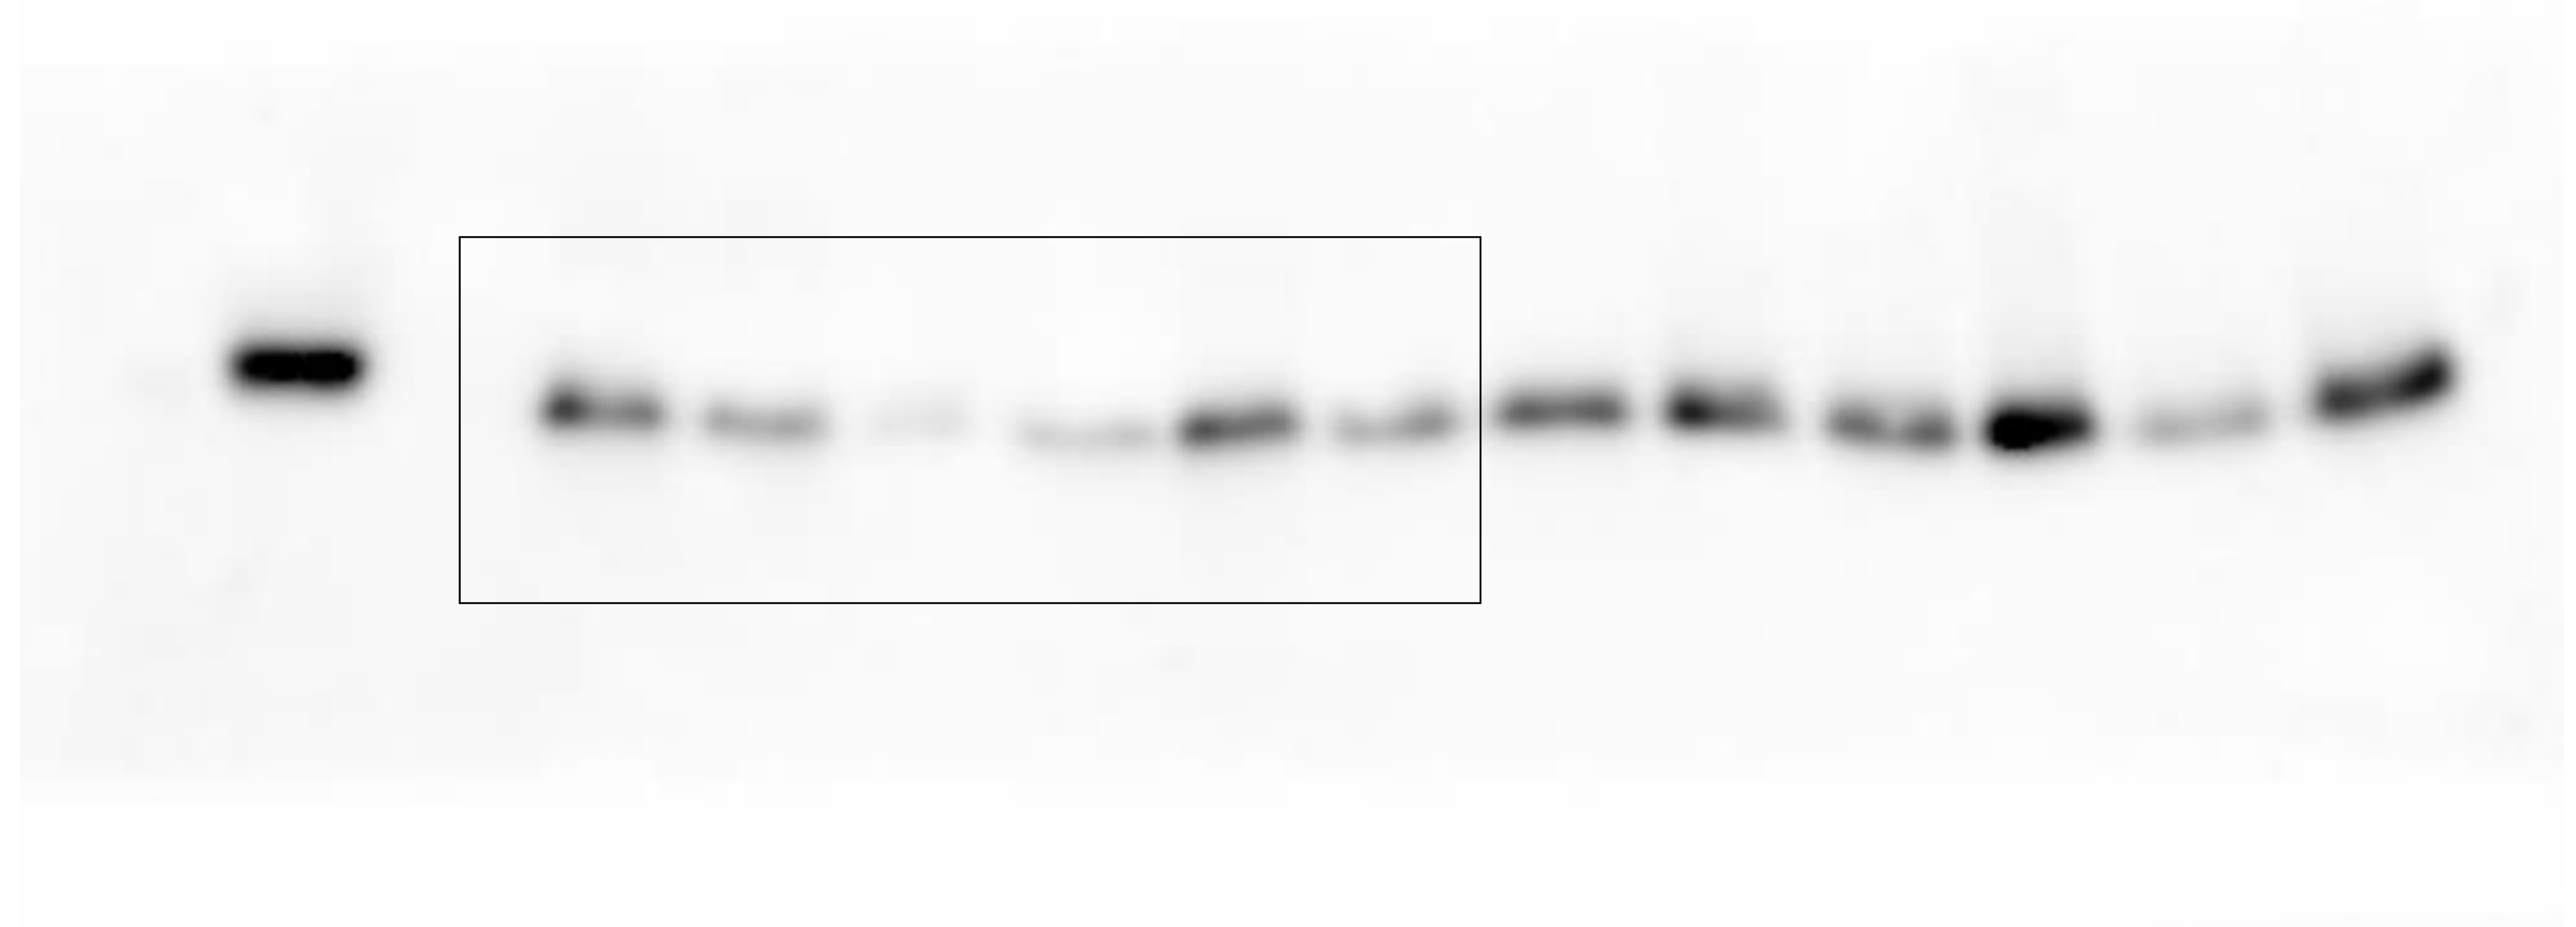



Figure 5c

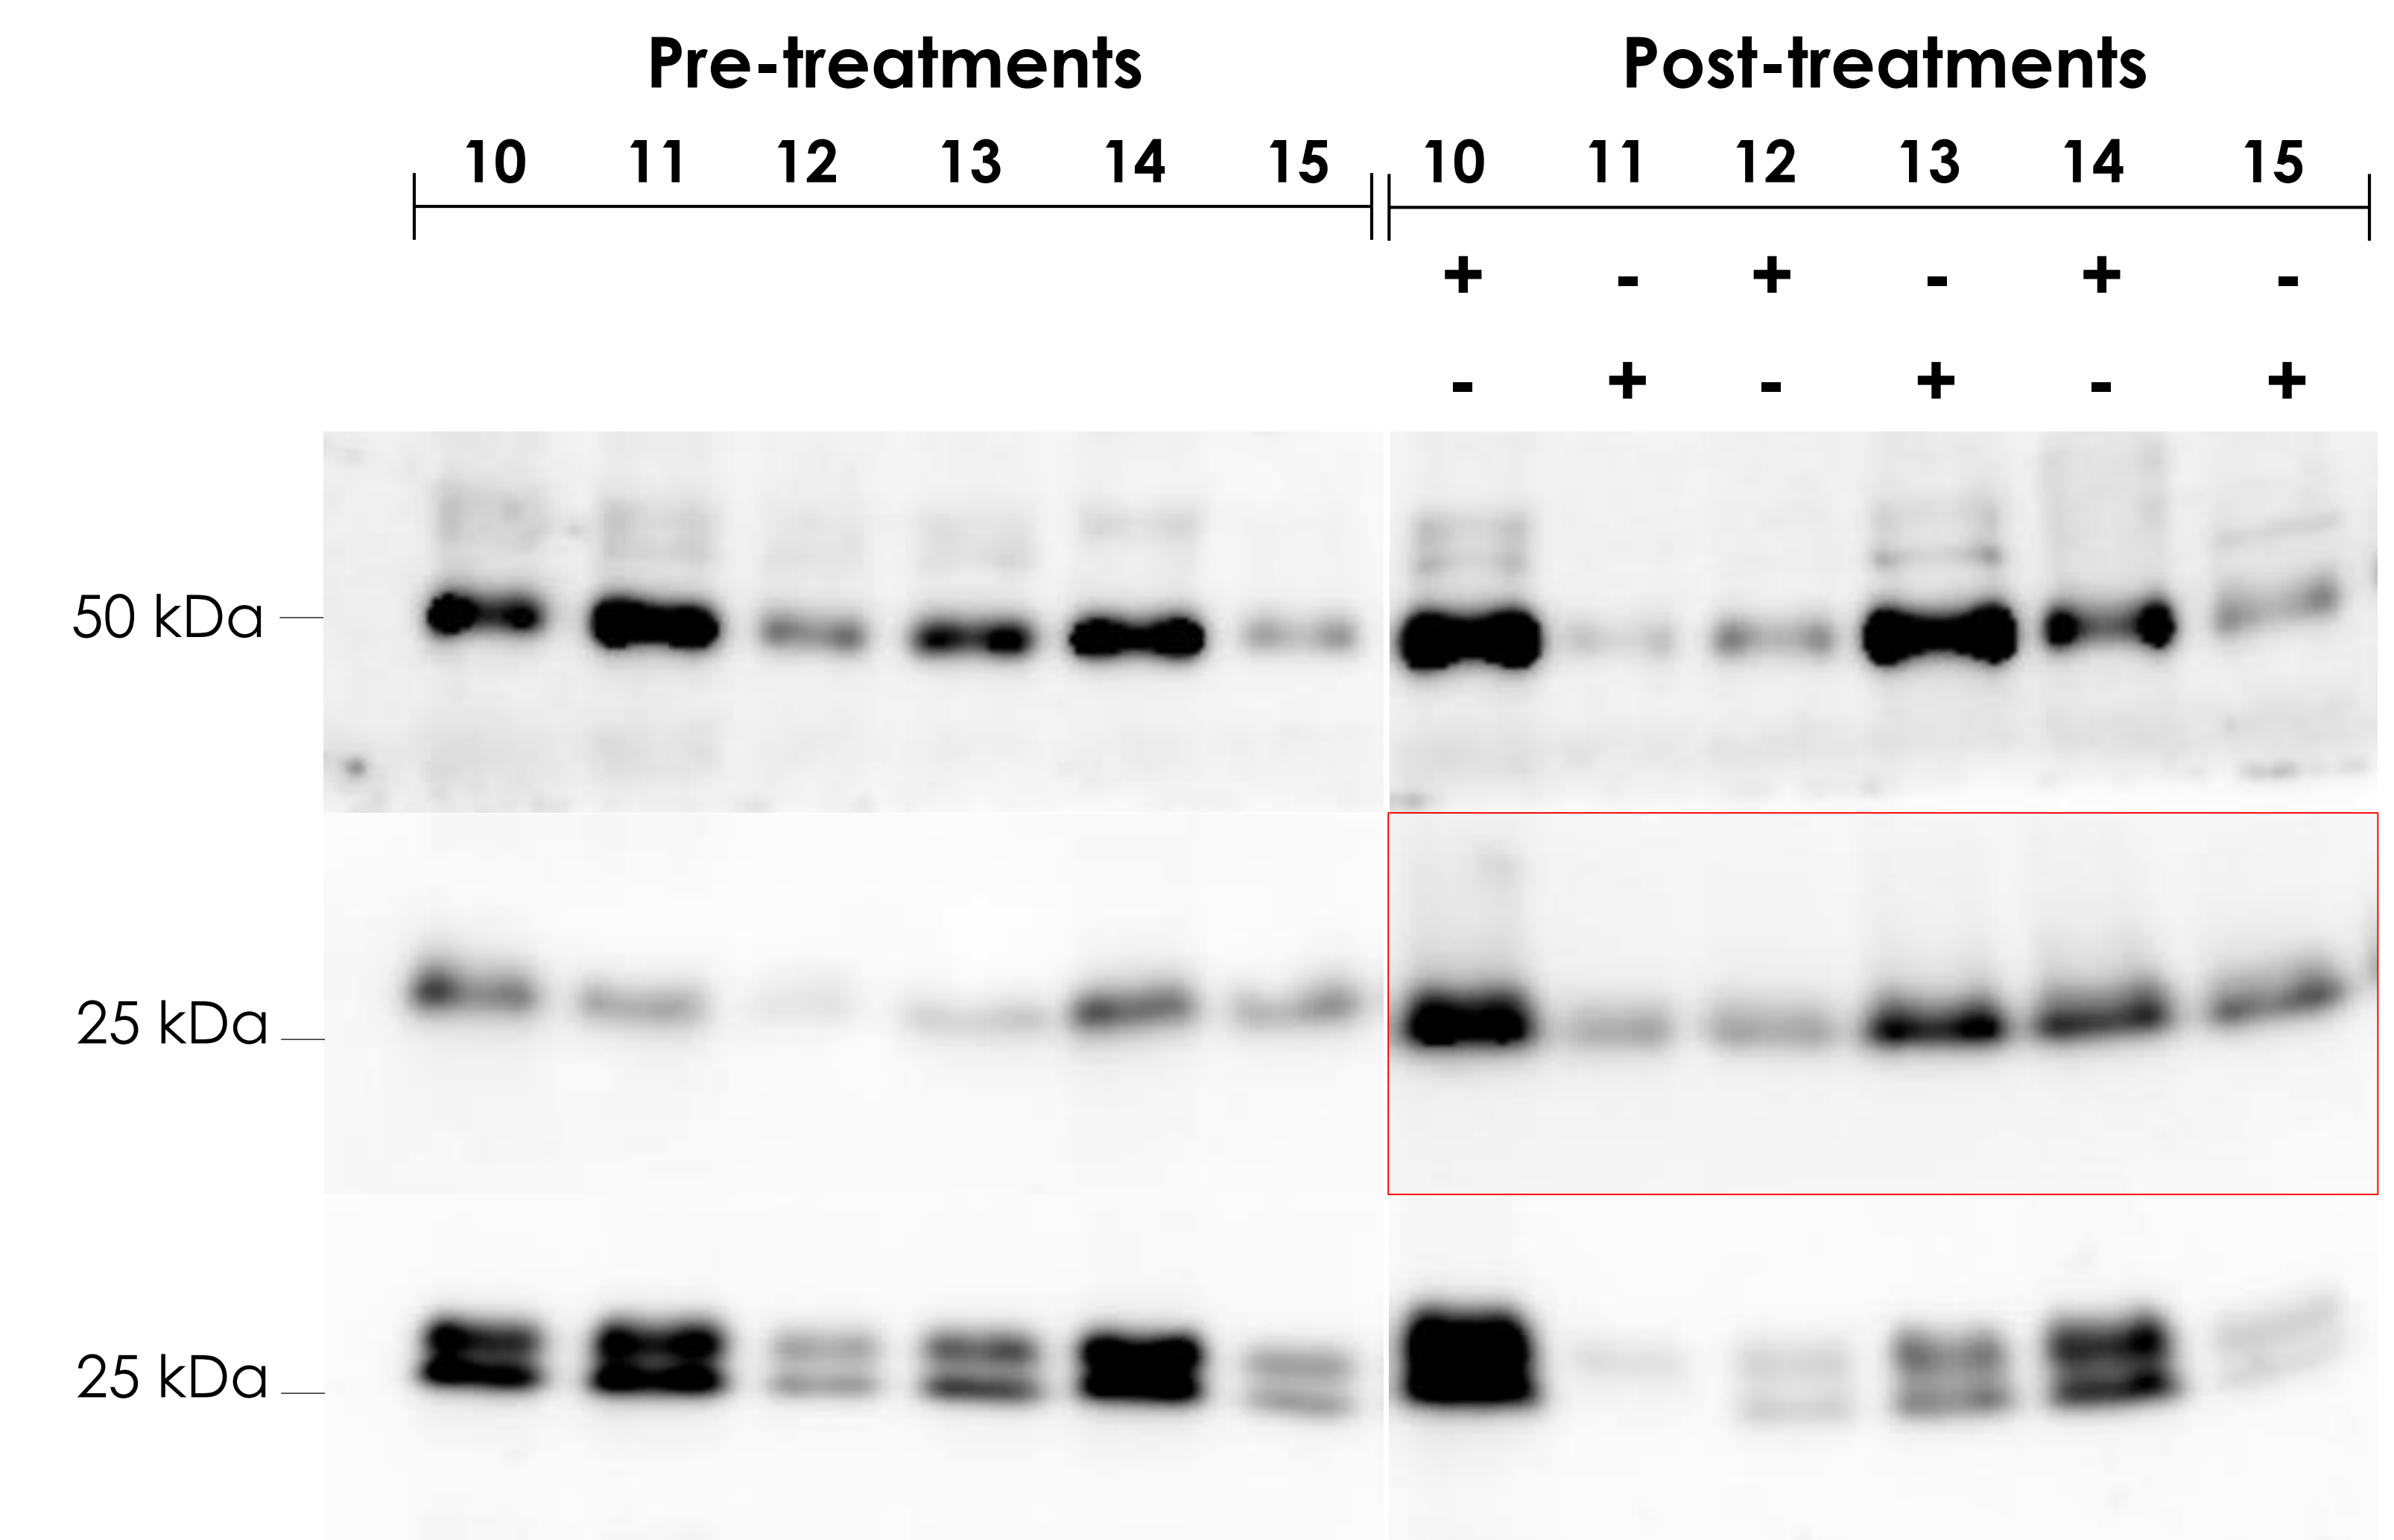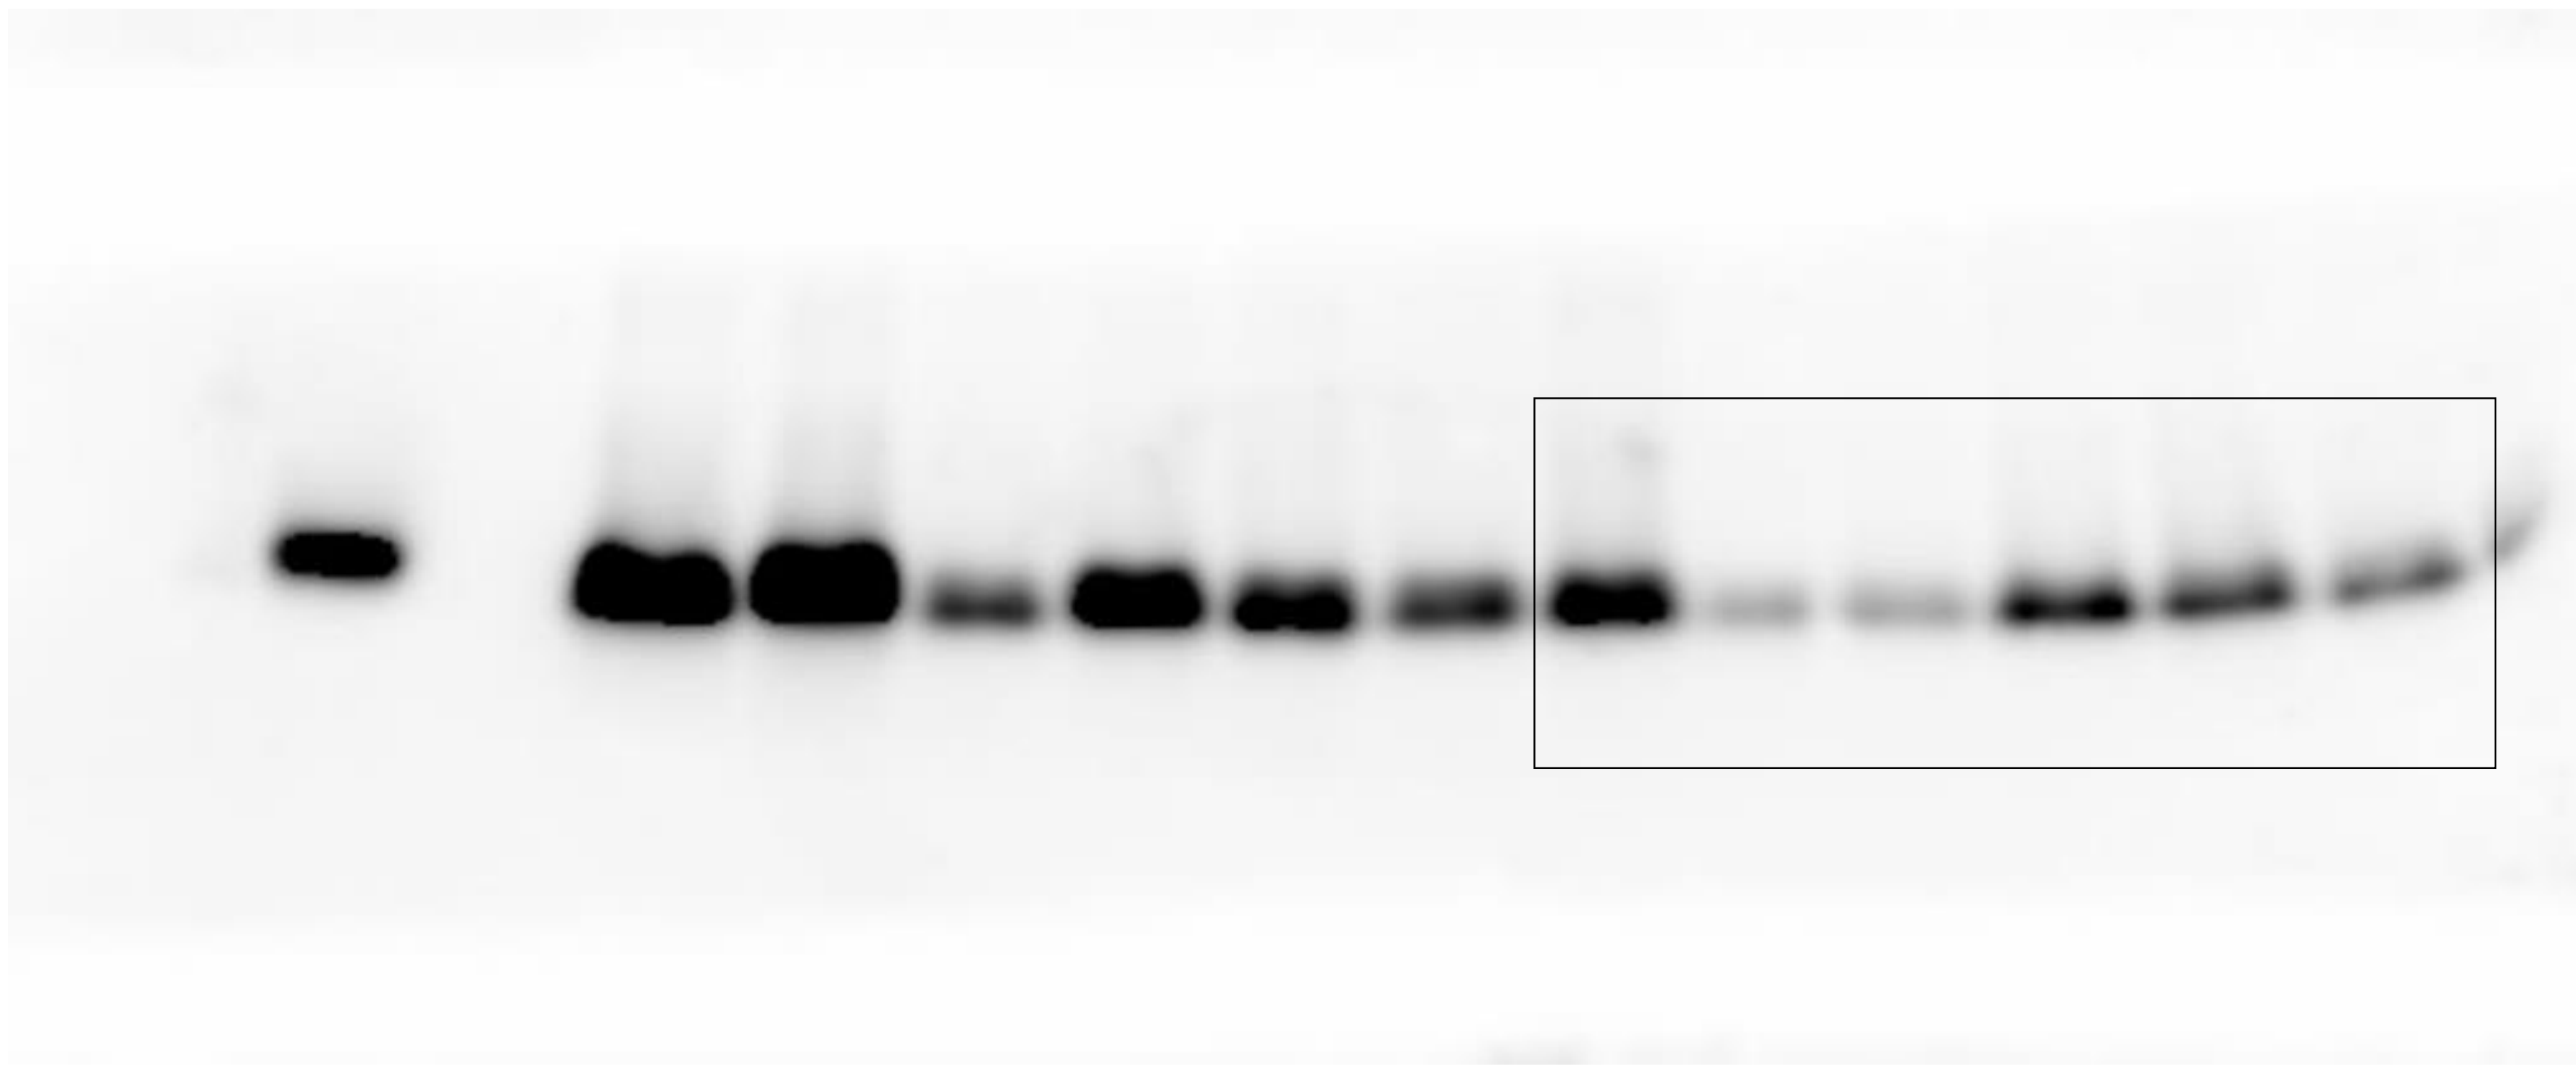

Figure 5c

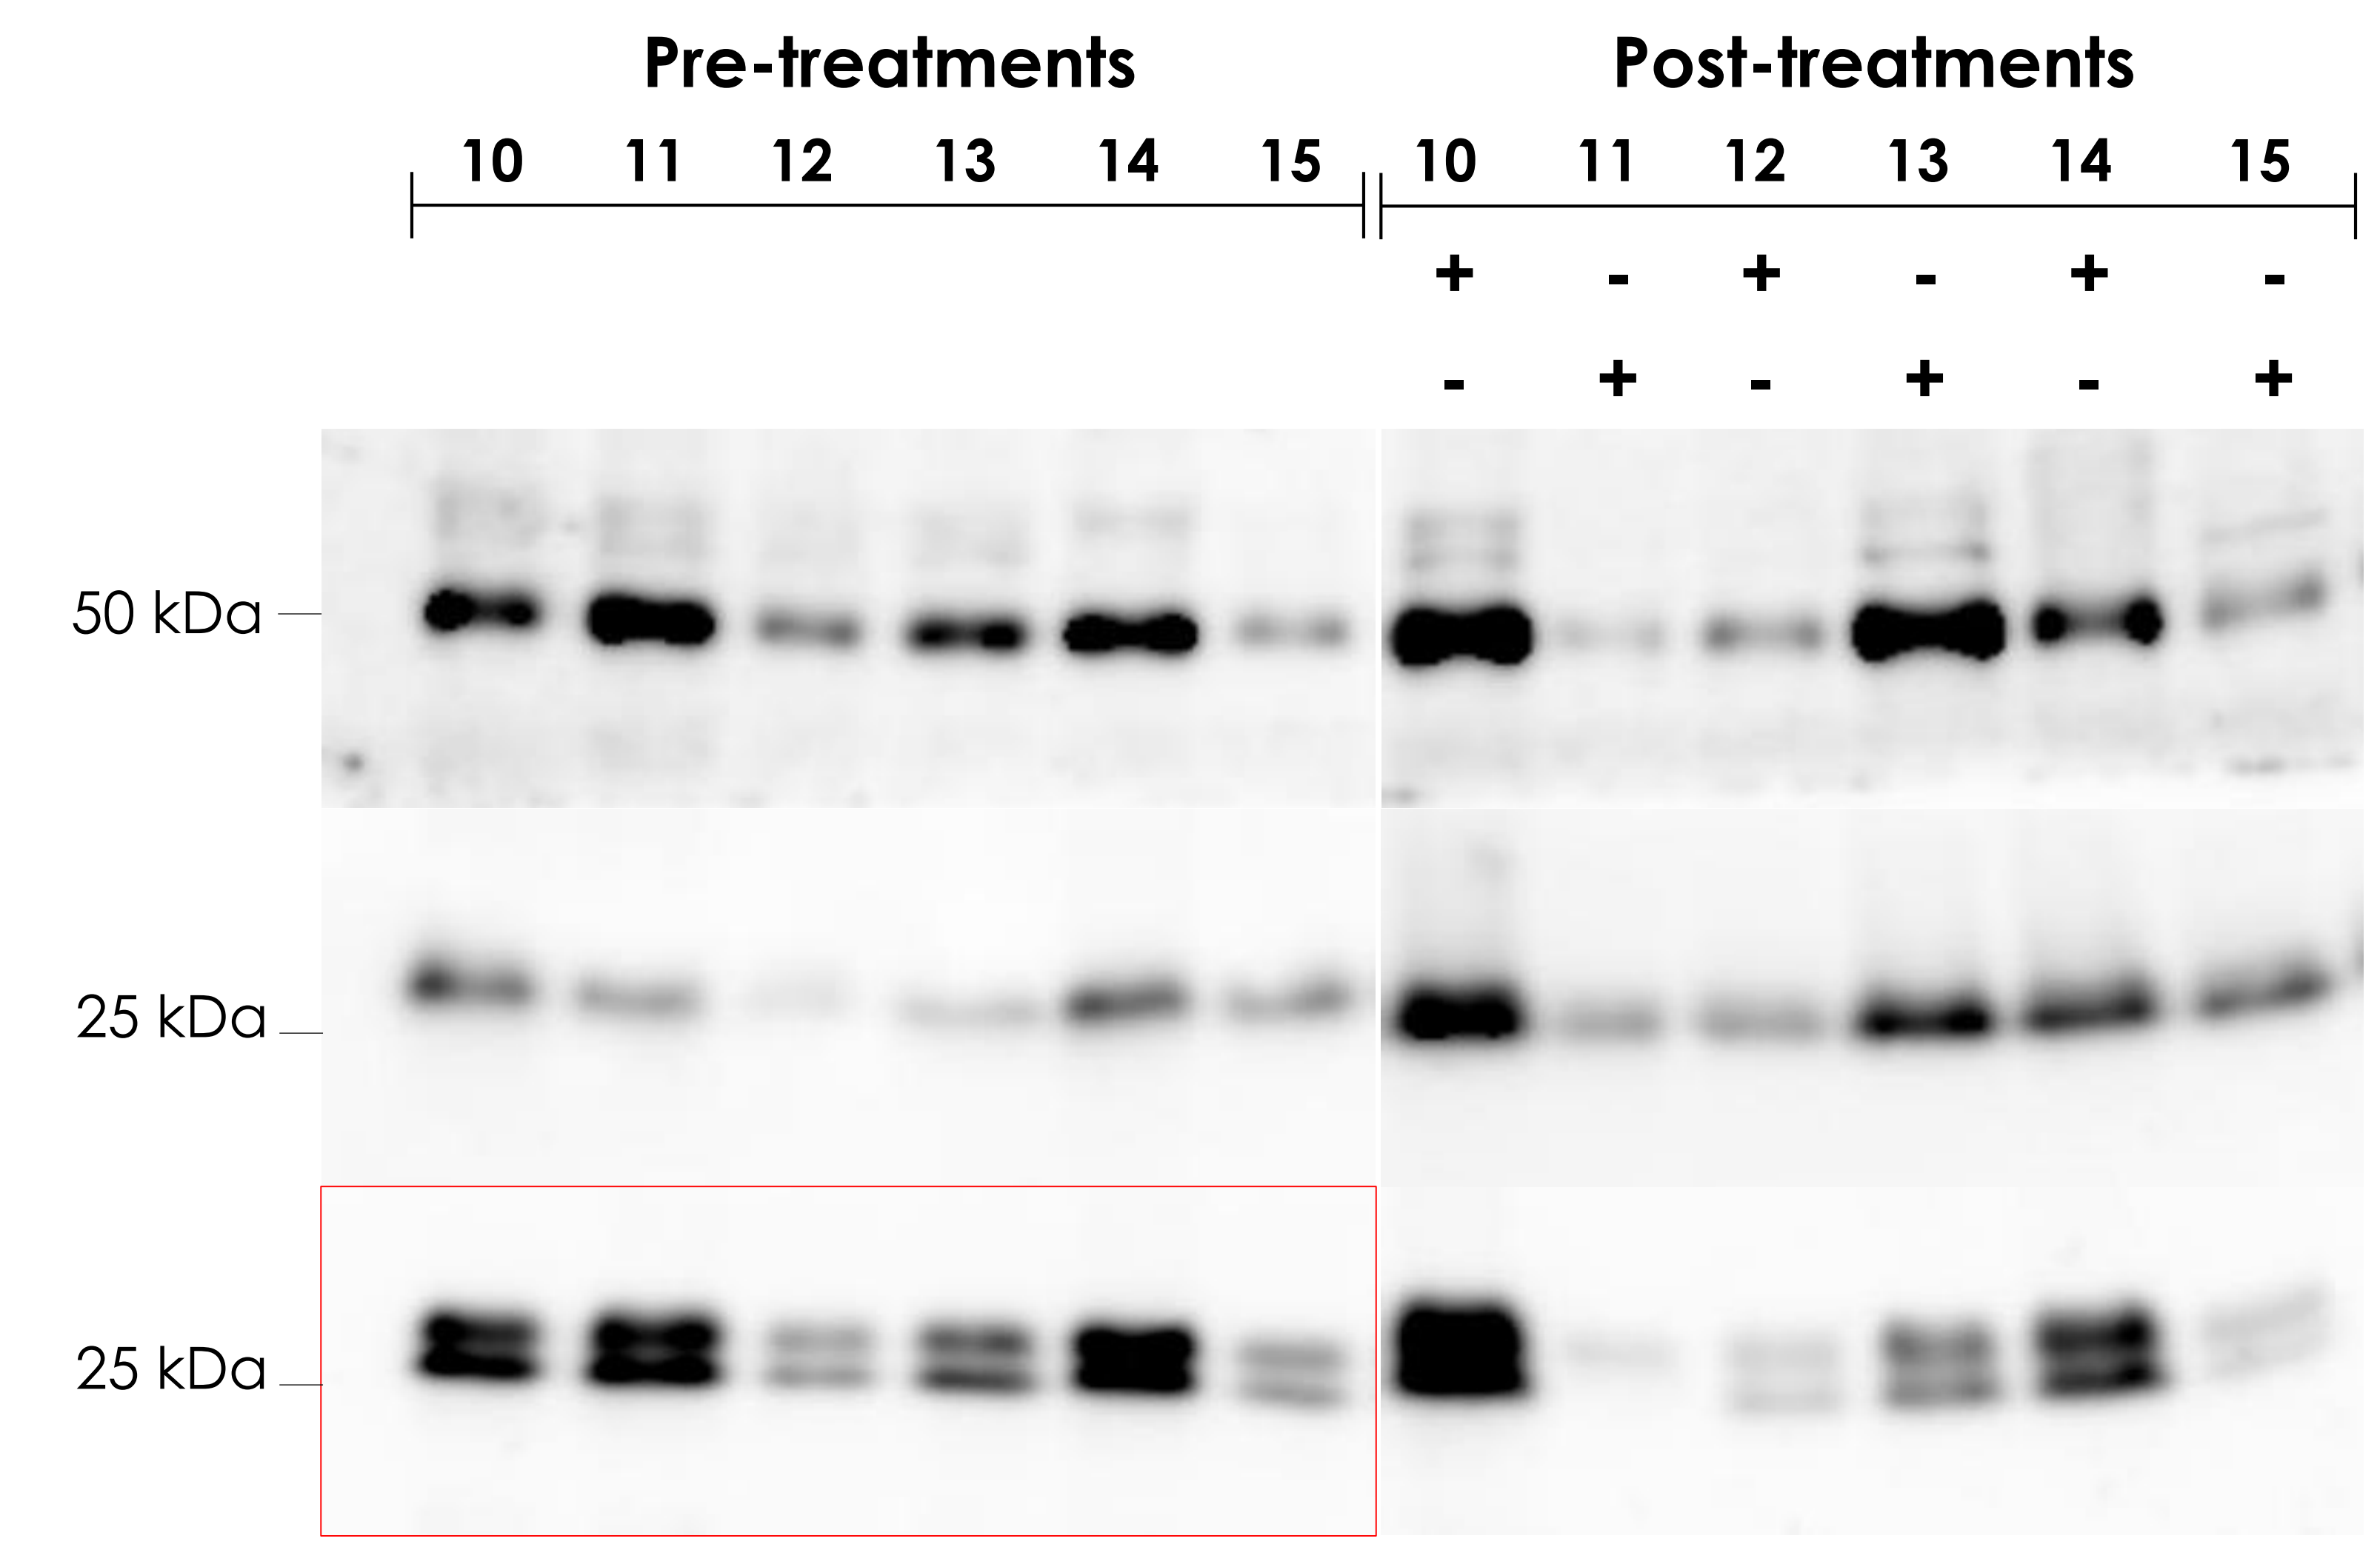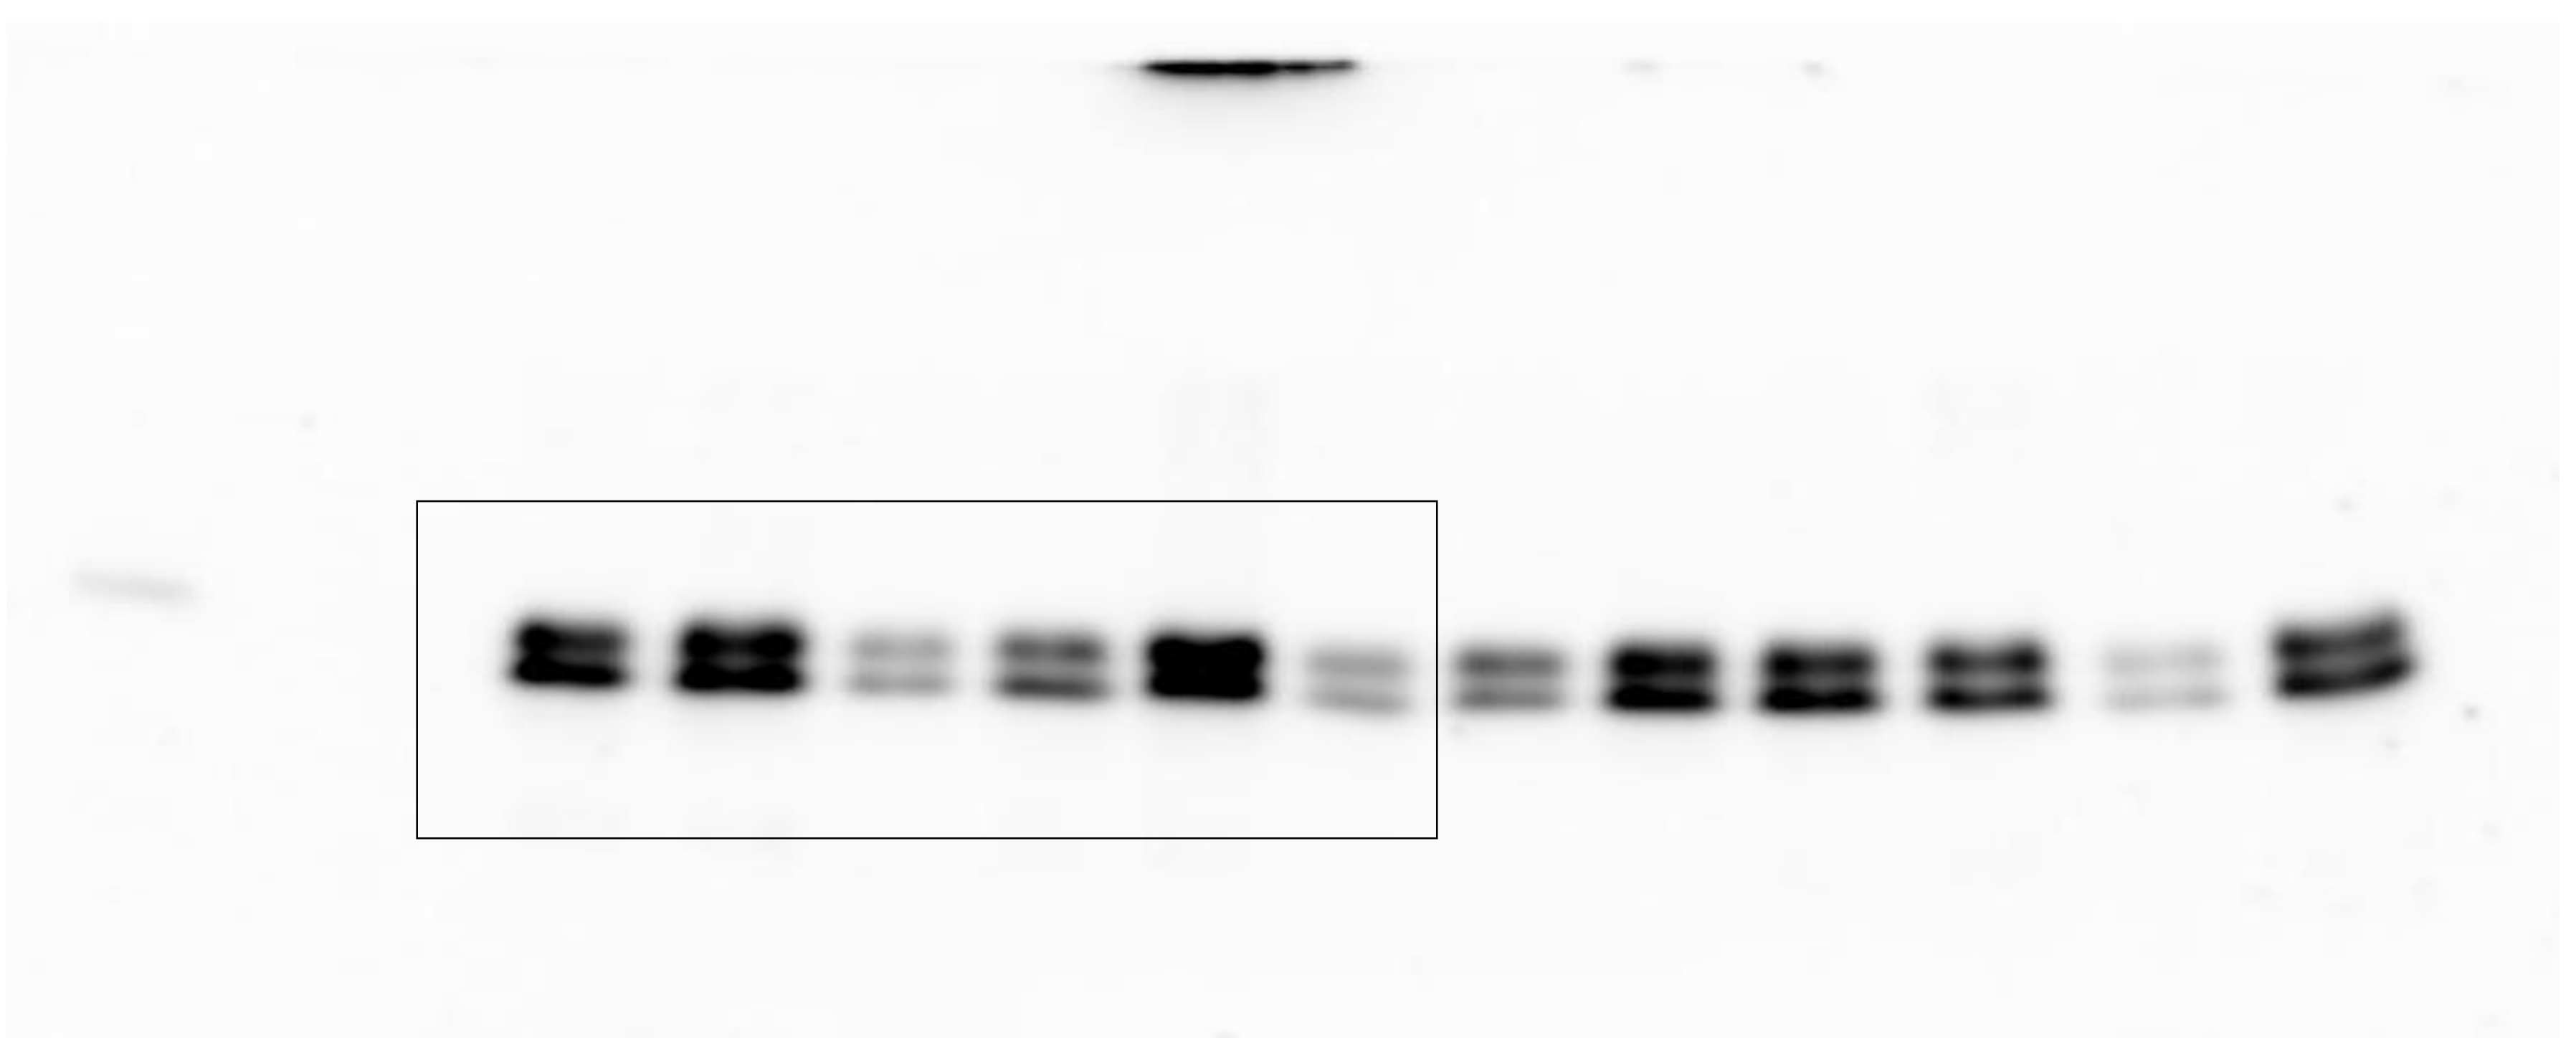

Figure 5c

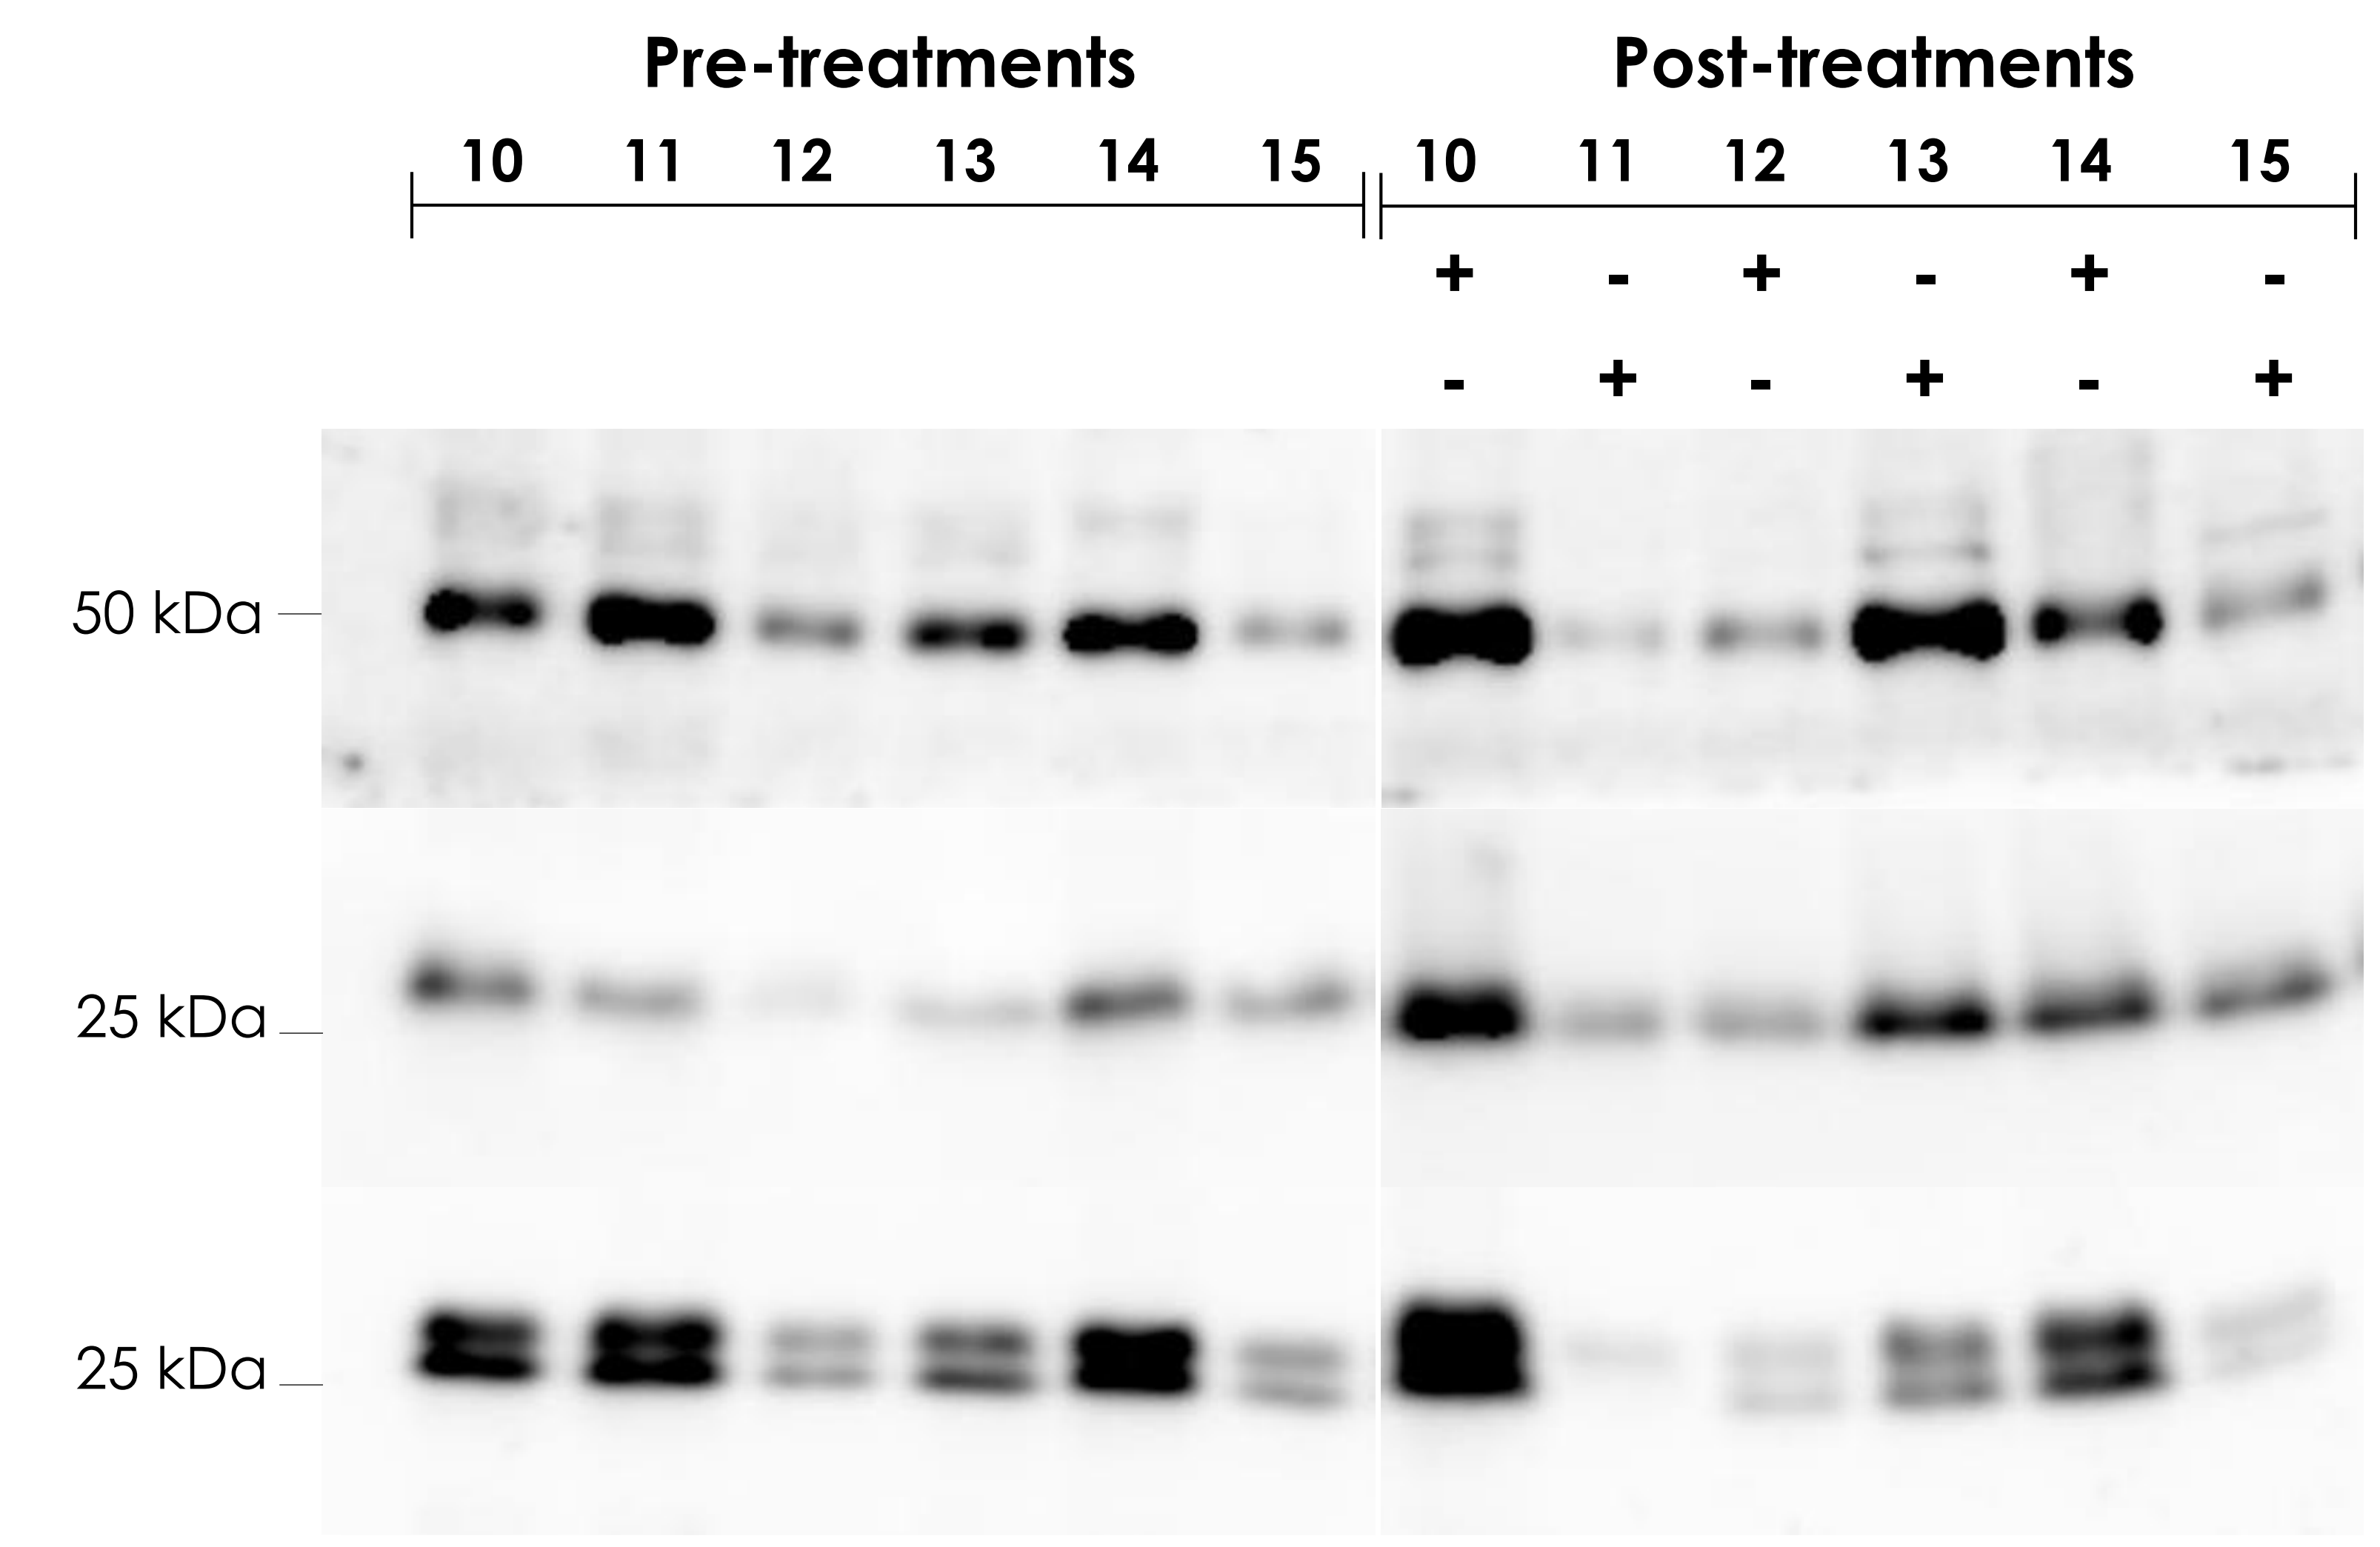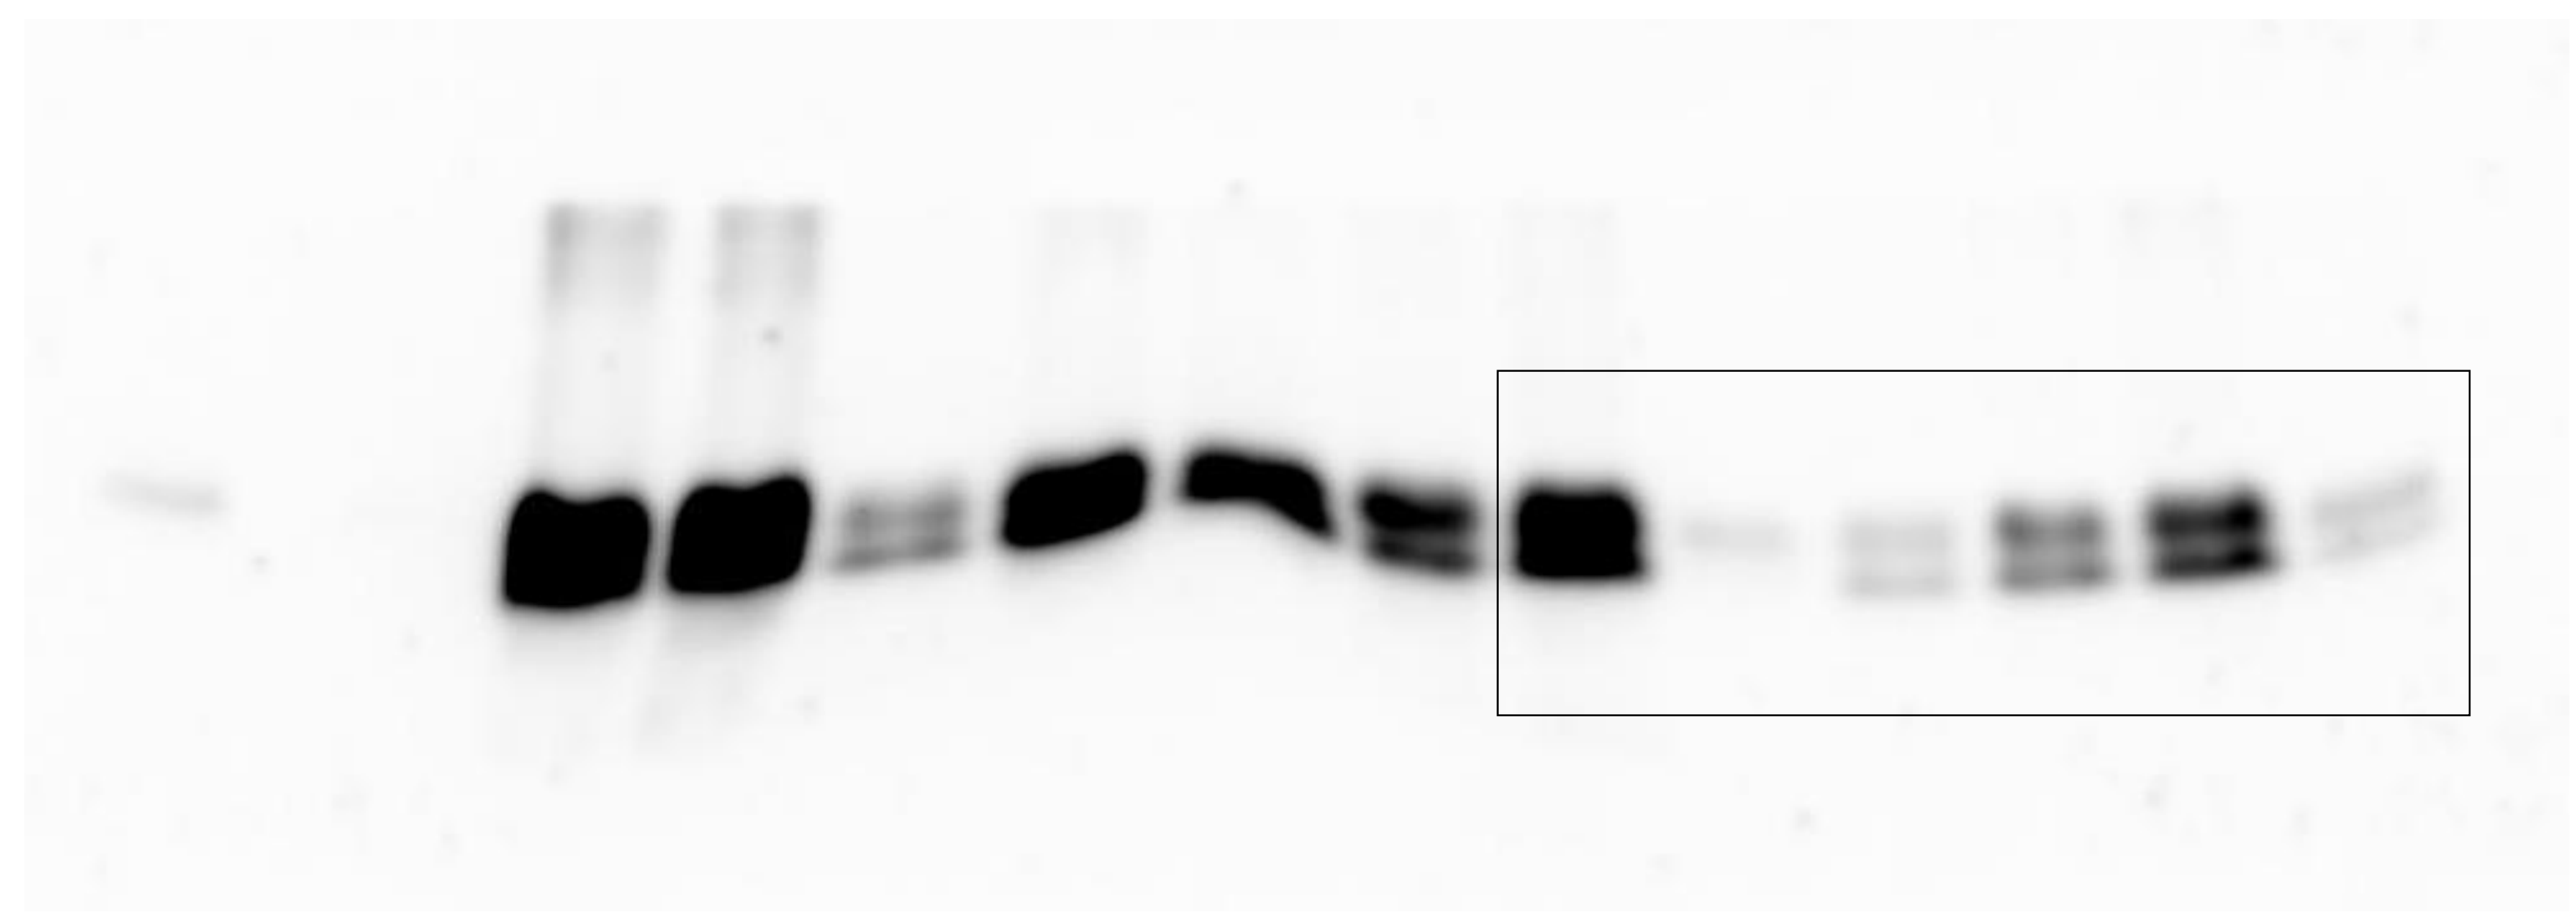

Figure 6a

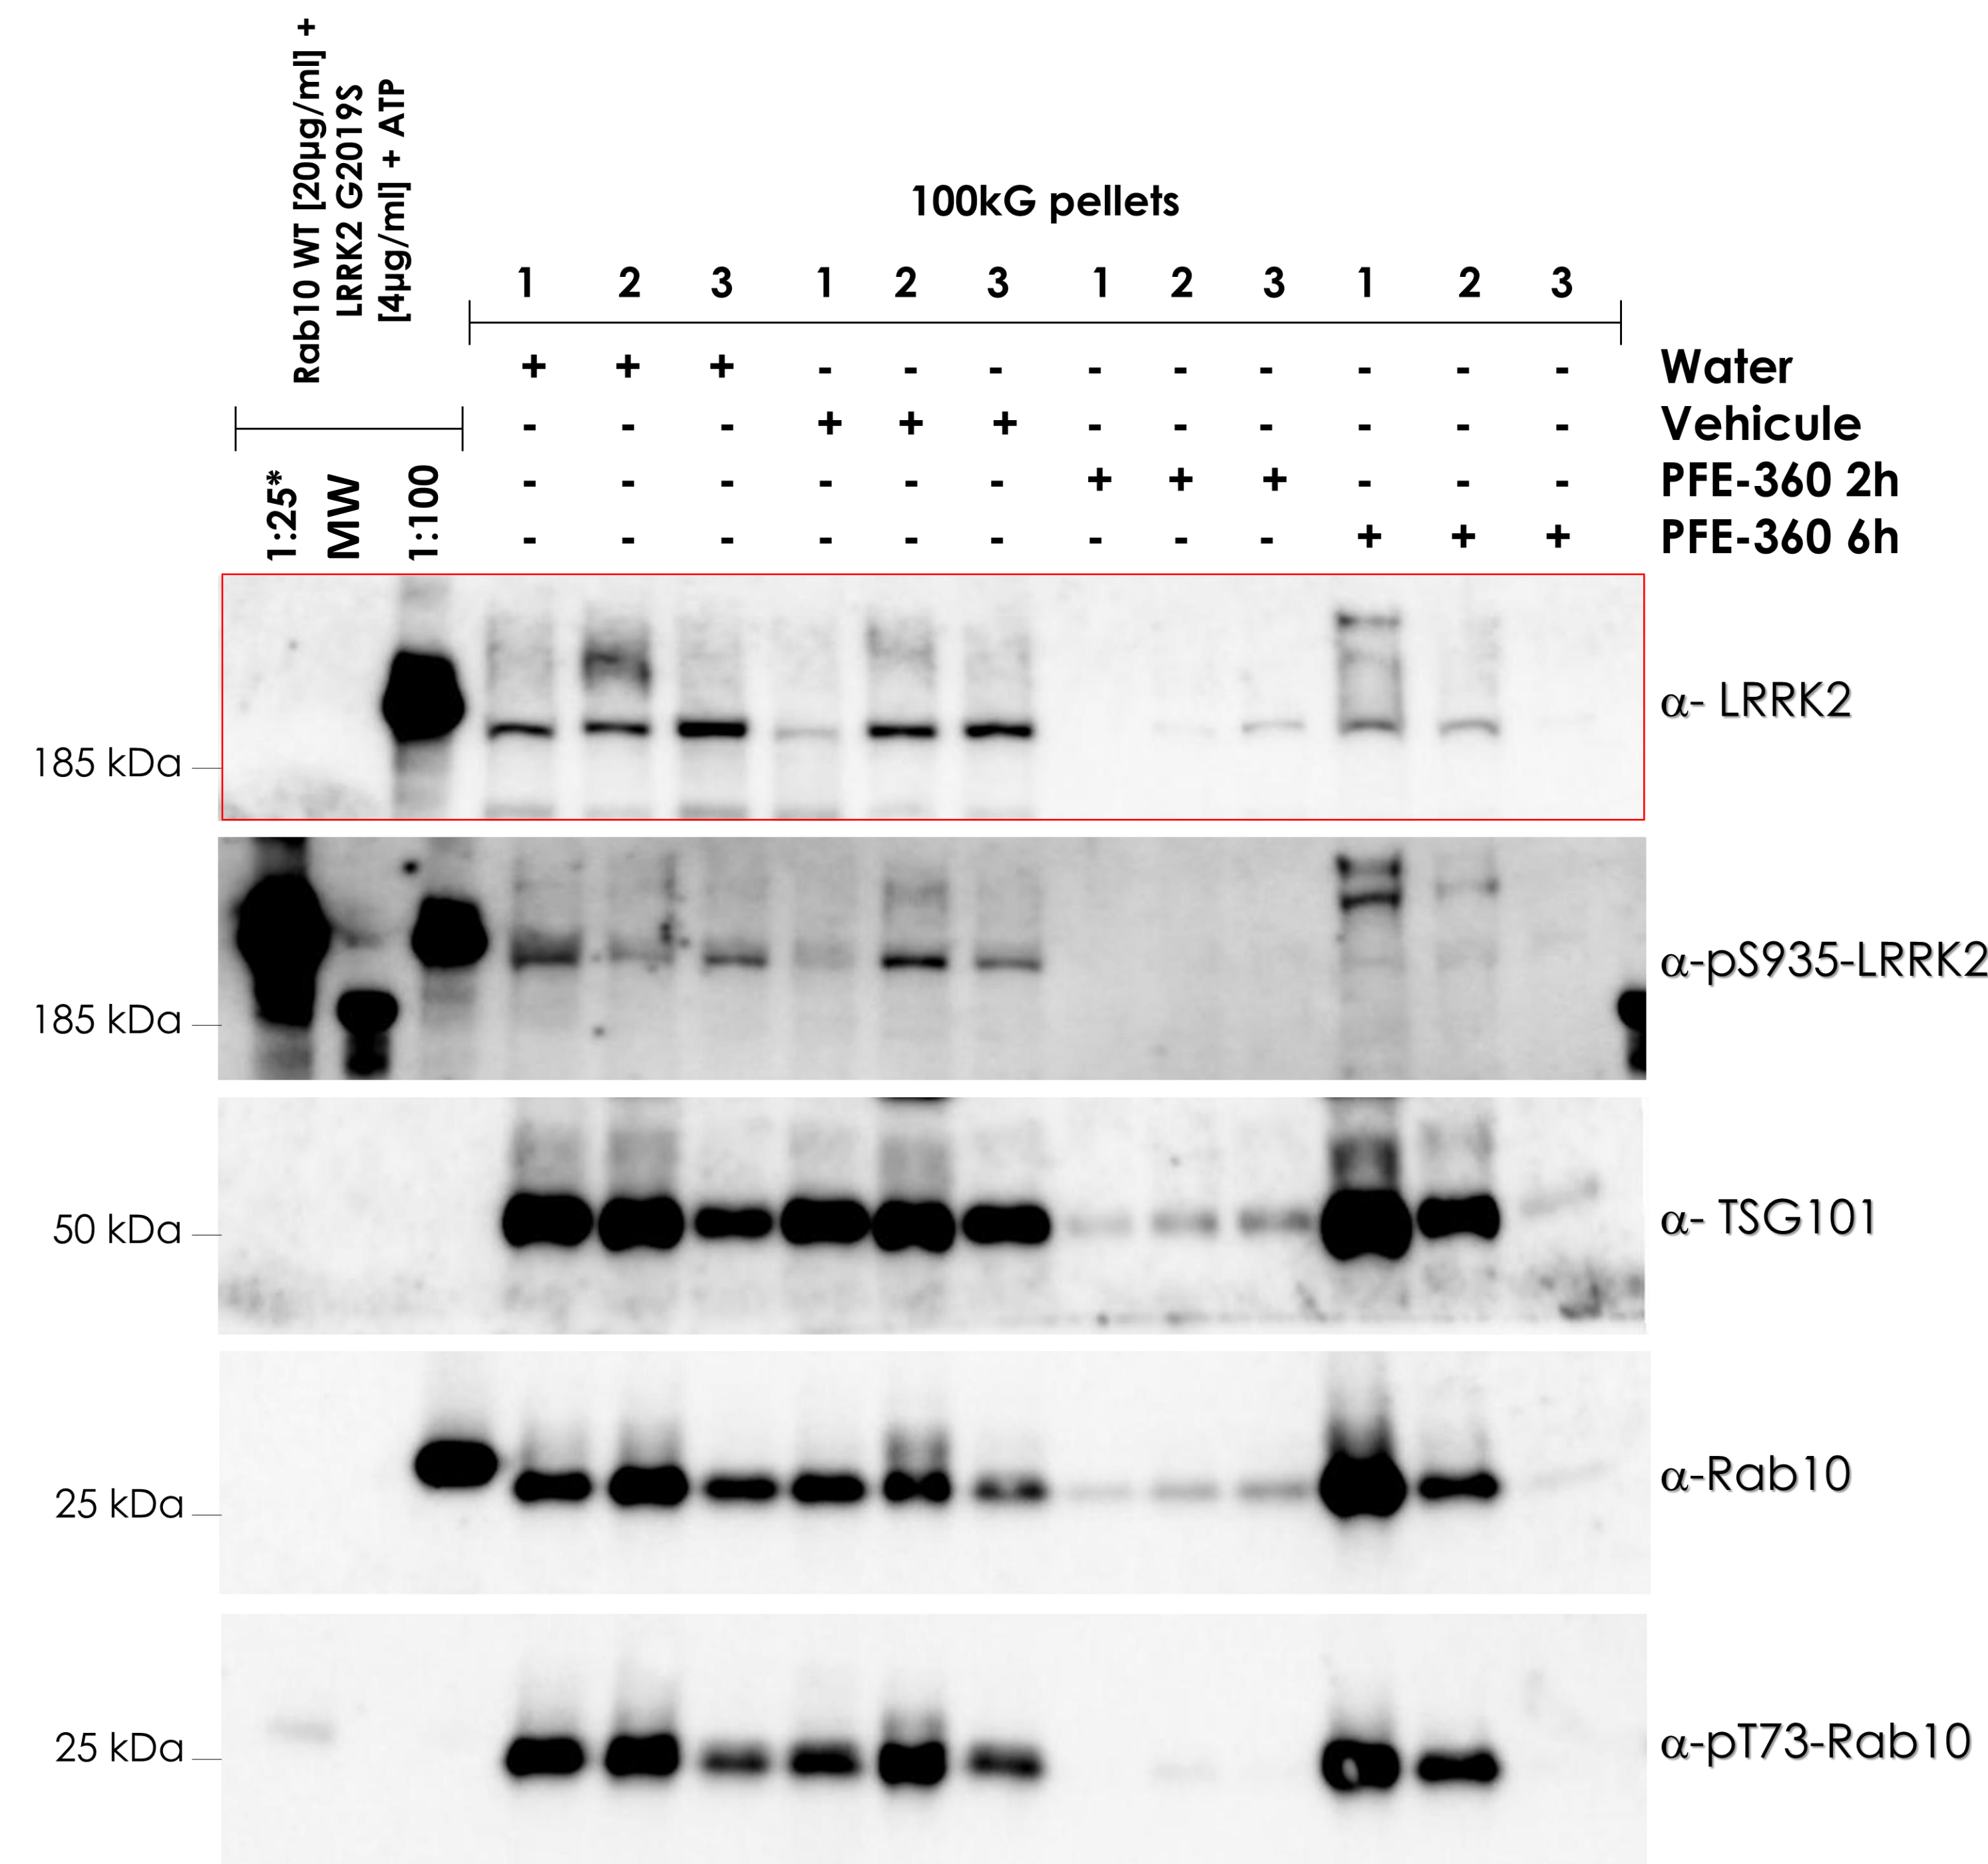

\*Only loaded for  $\alpha$ -pS935-LRRK2 and  $\alpha$ -pT73-Rab10 antibodies

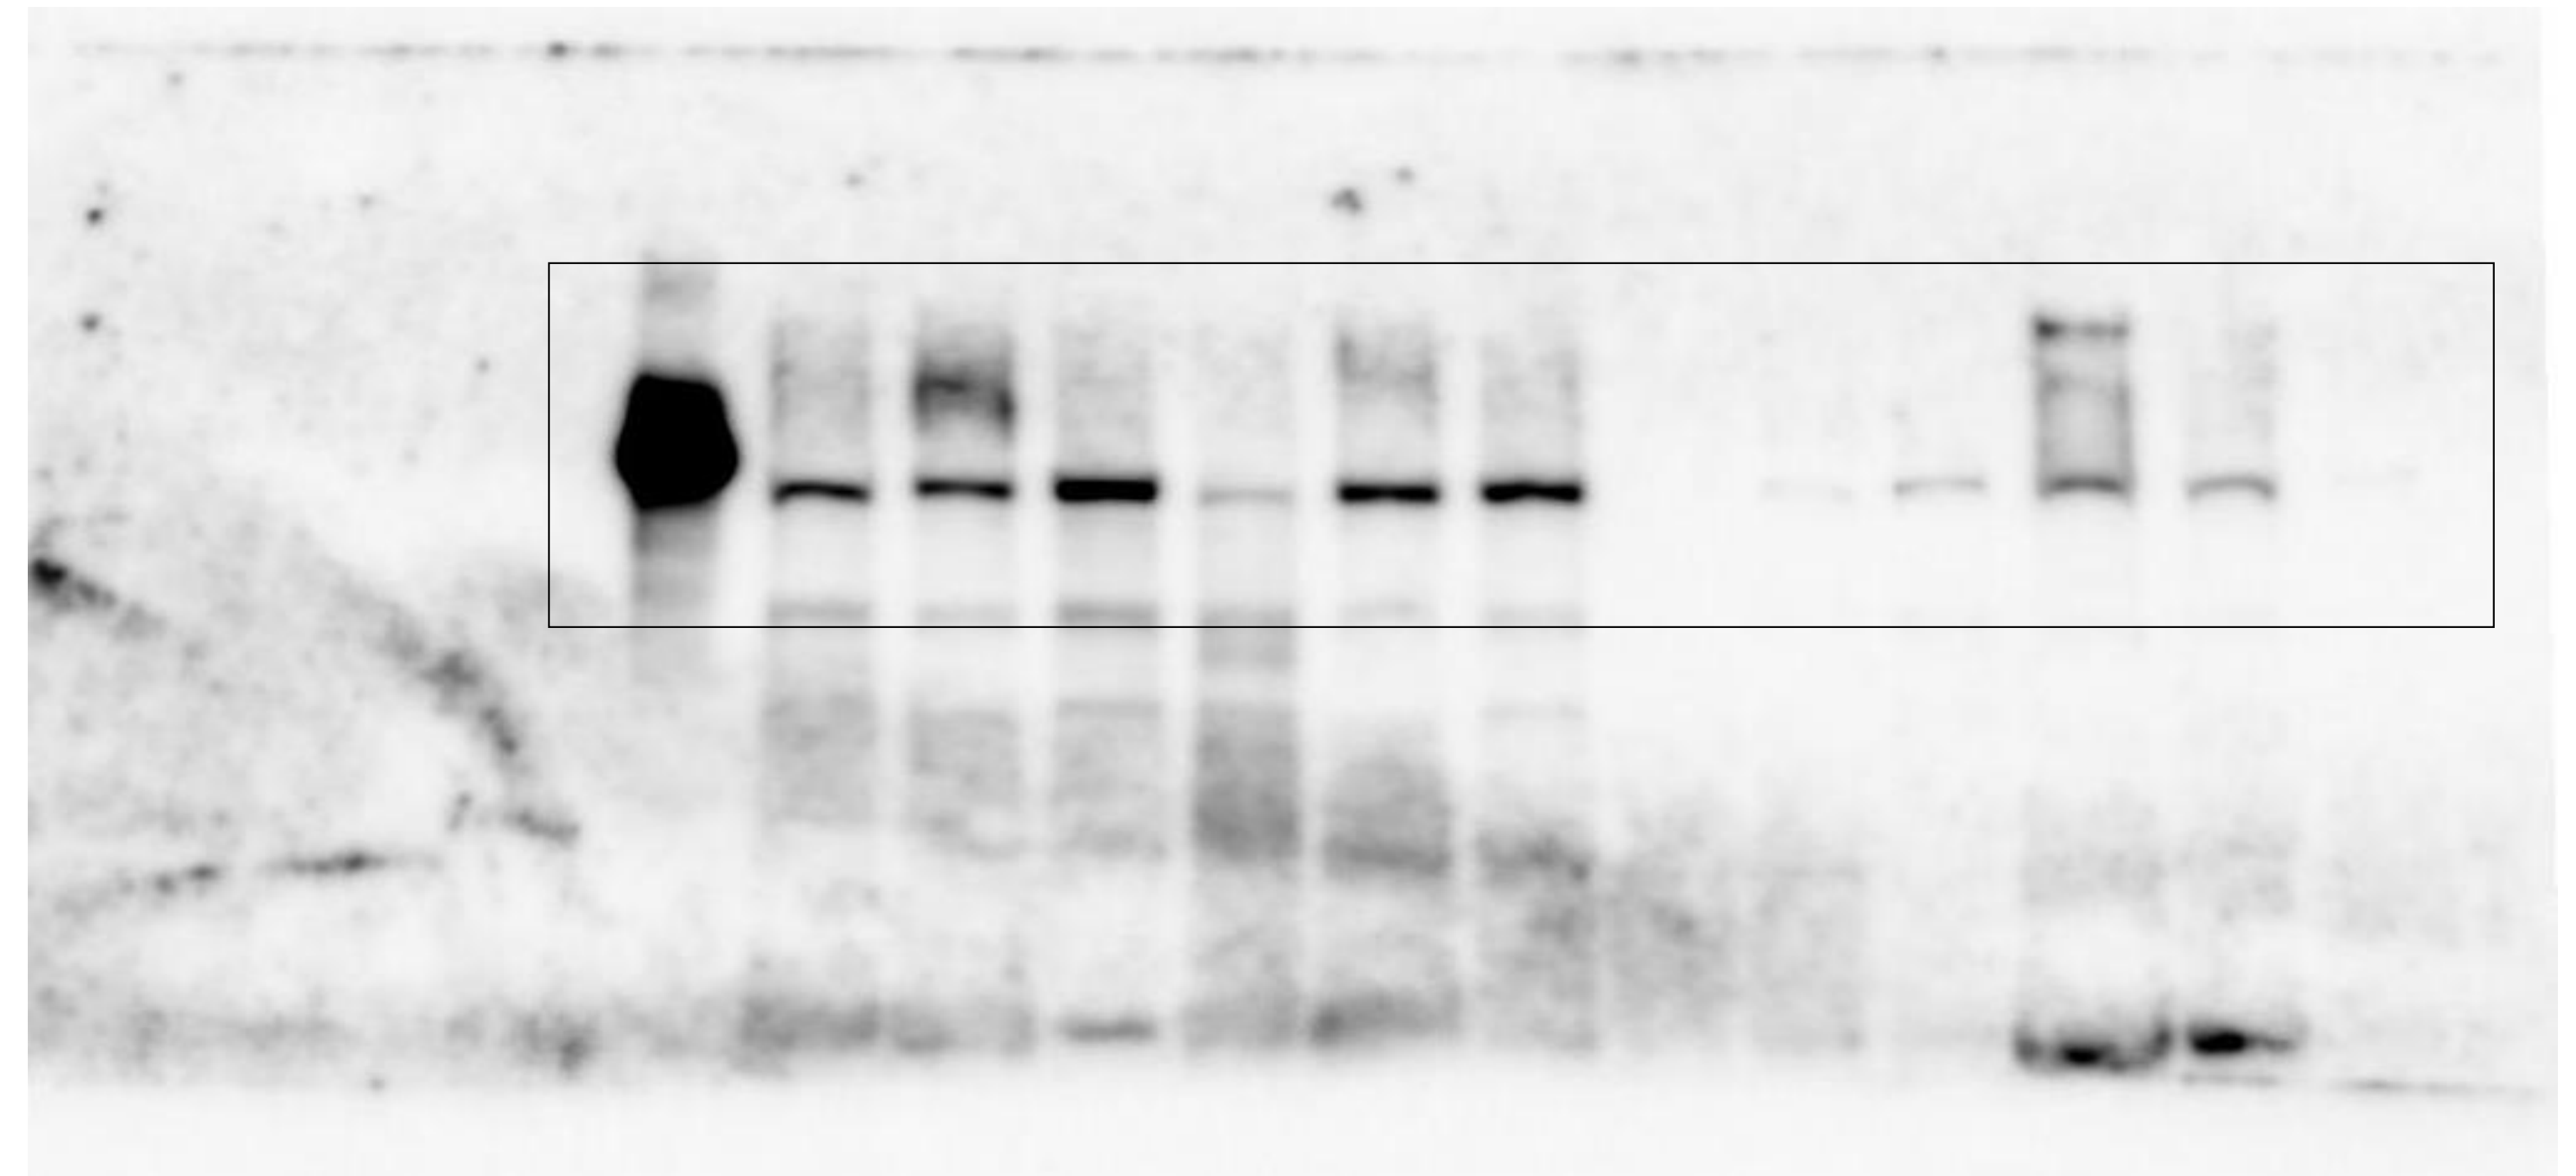

Figure 6a

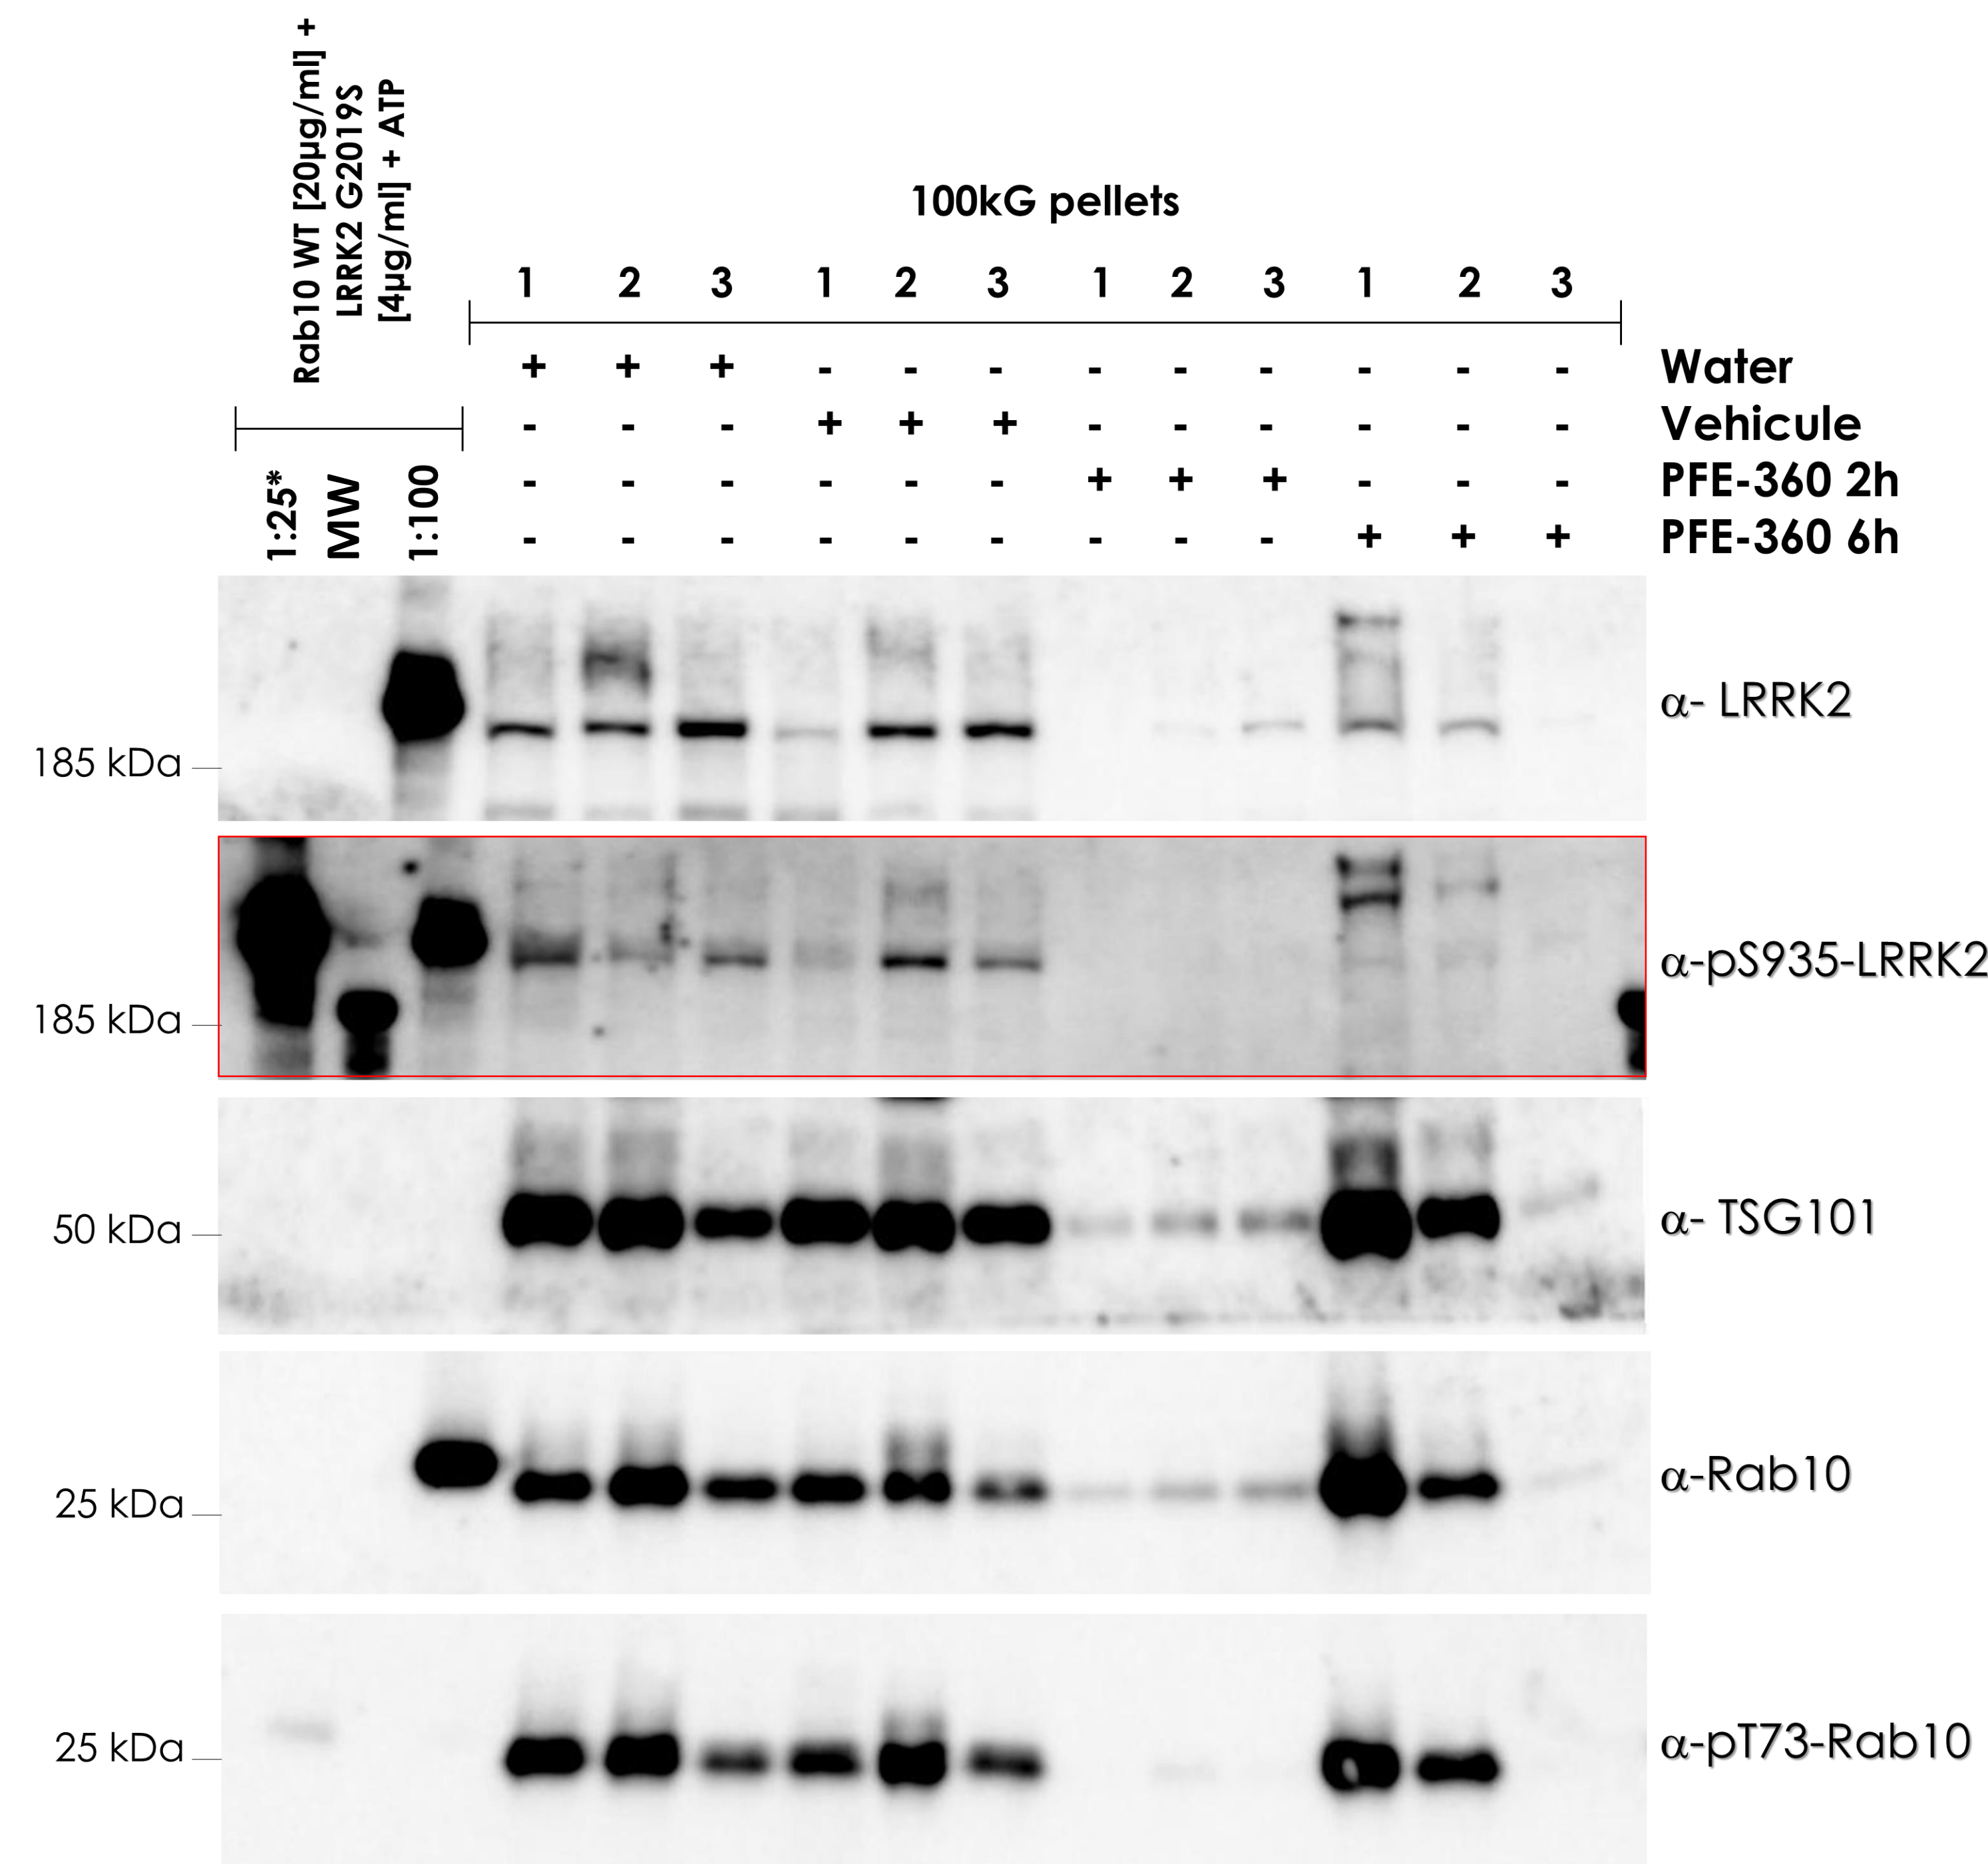

\*Only loaded for α-pS935-LRRK2 and α-pT73-Rab10 antibodies

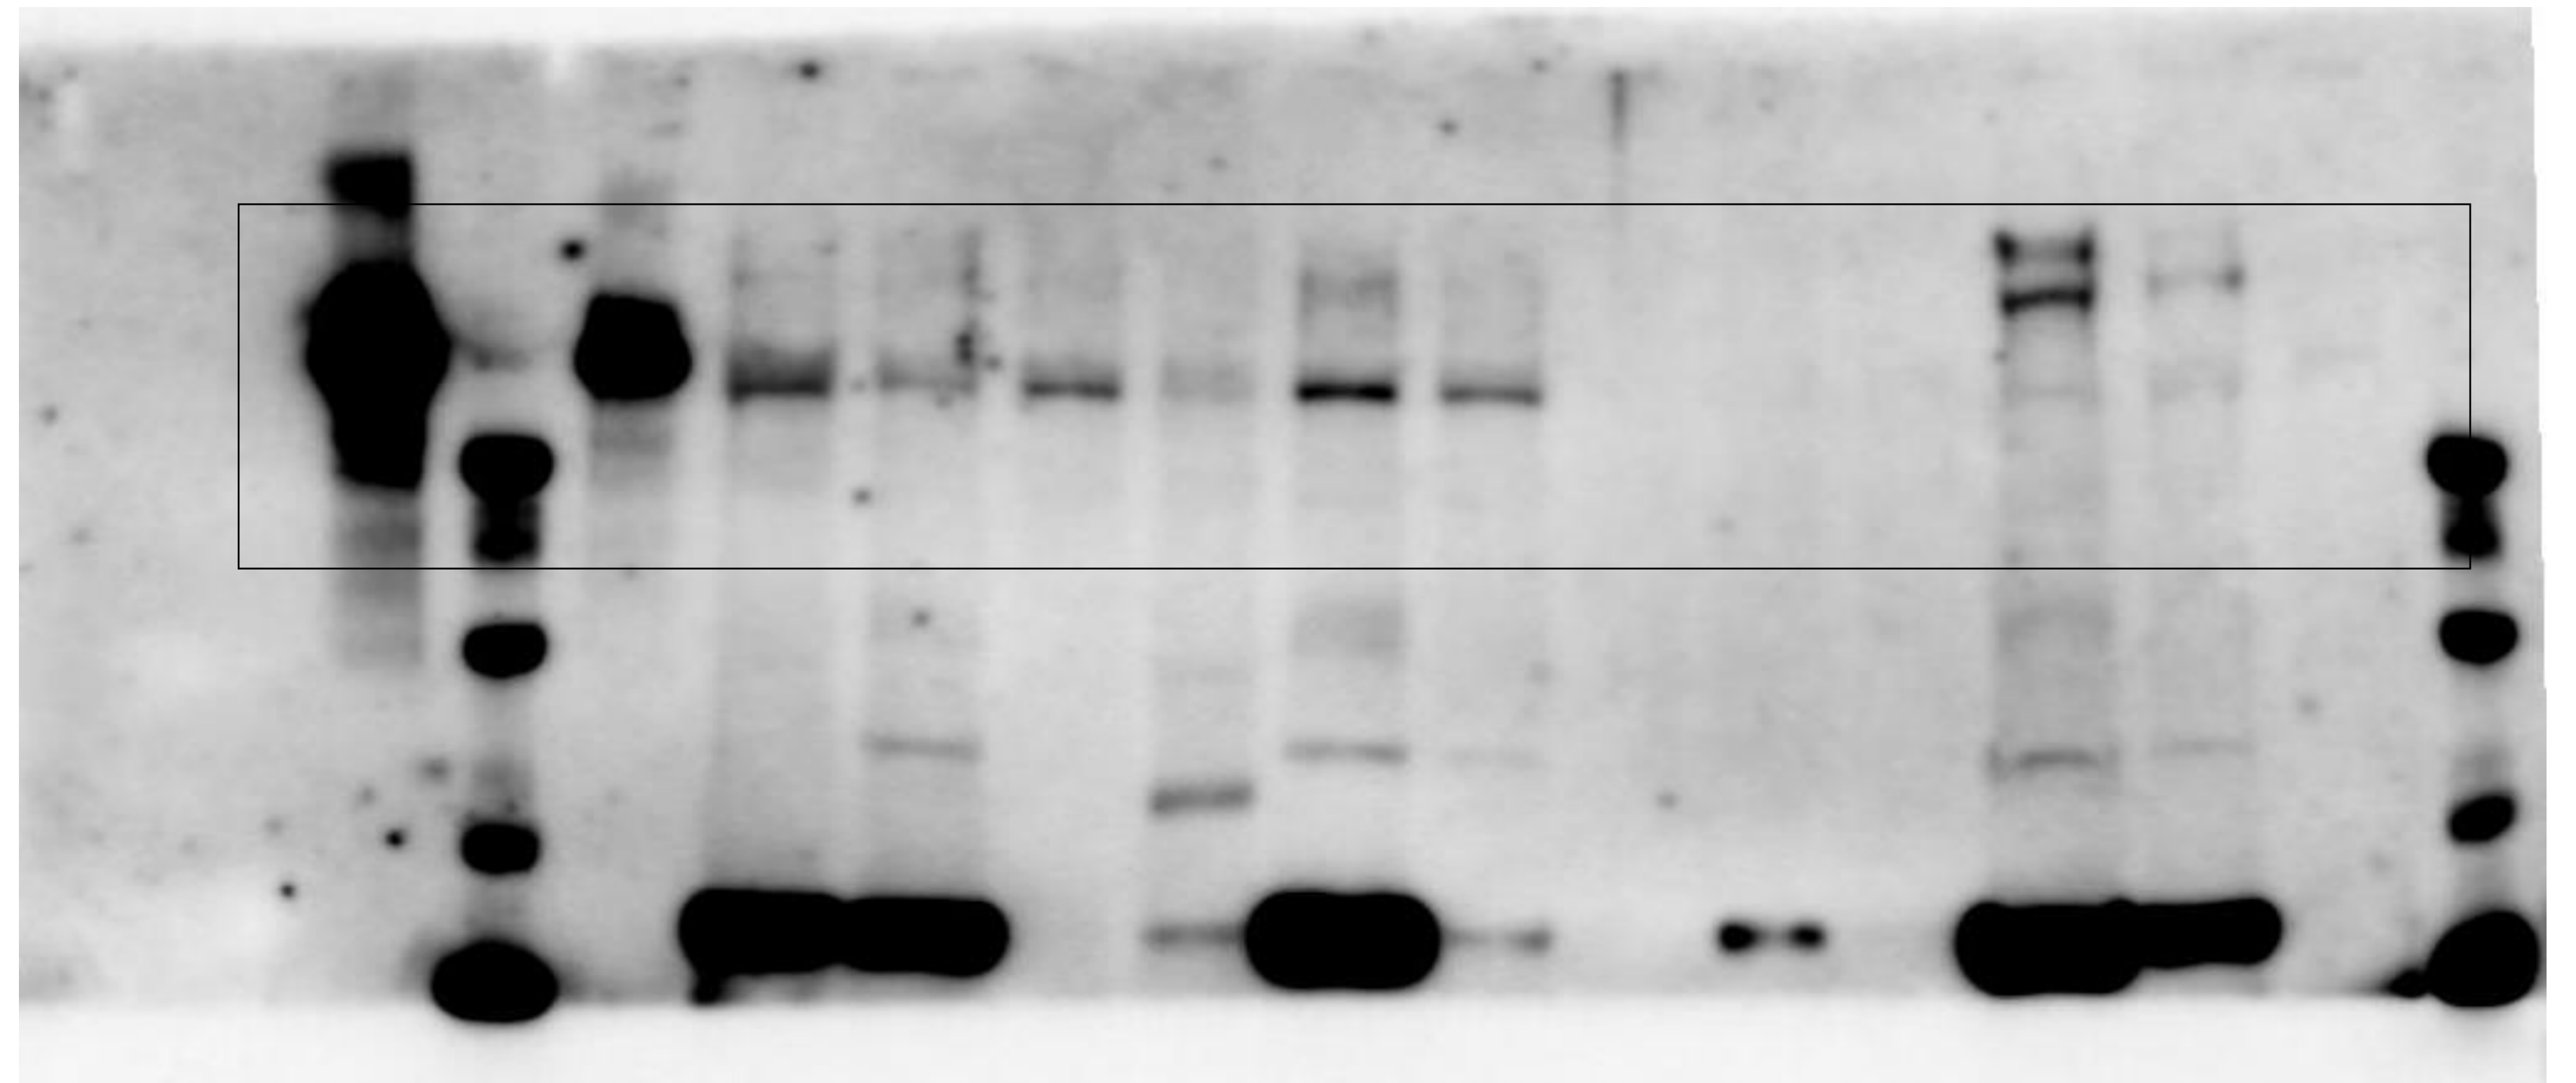

Figure 6a

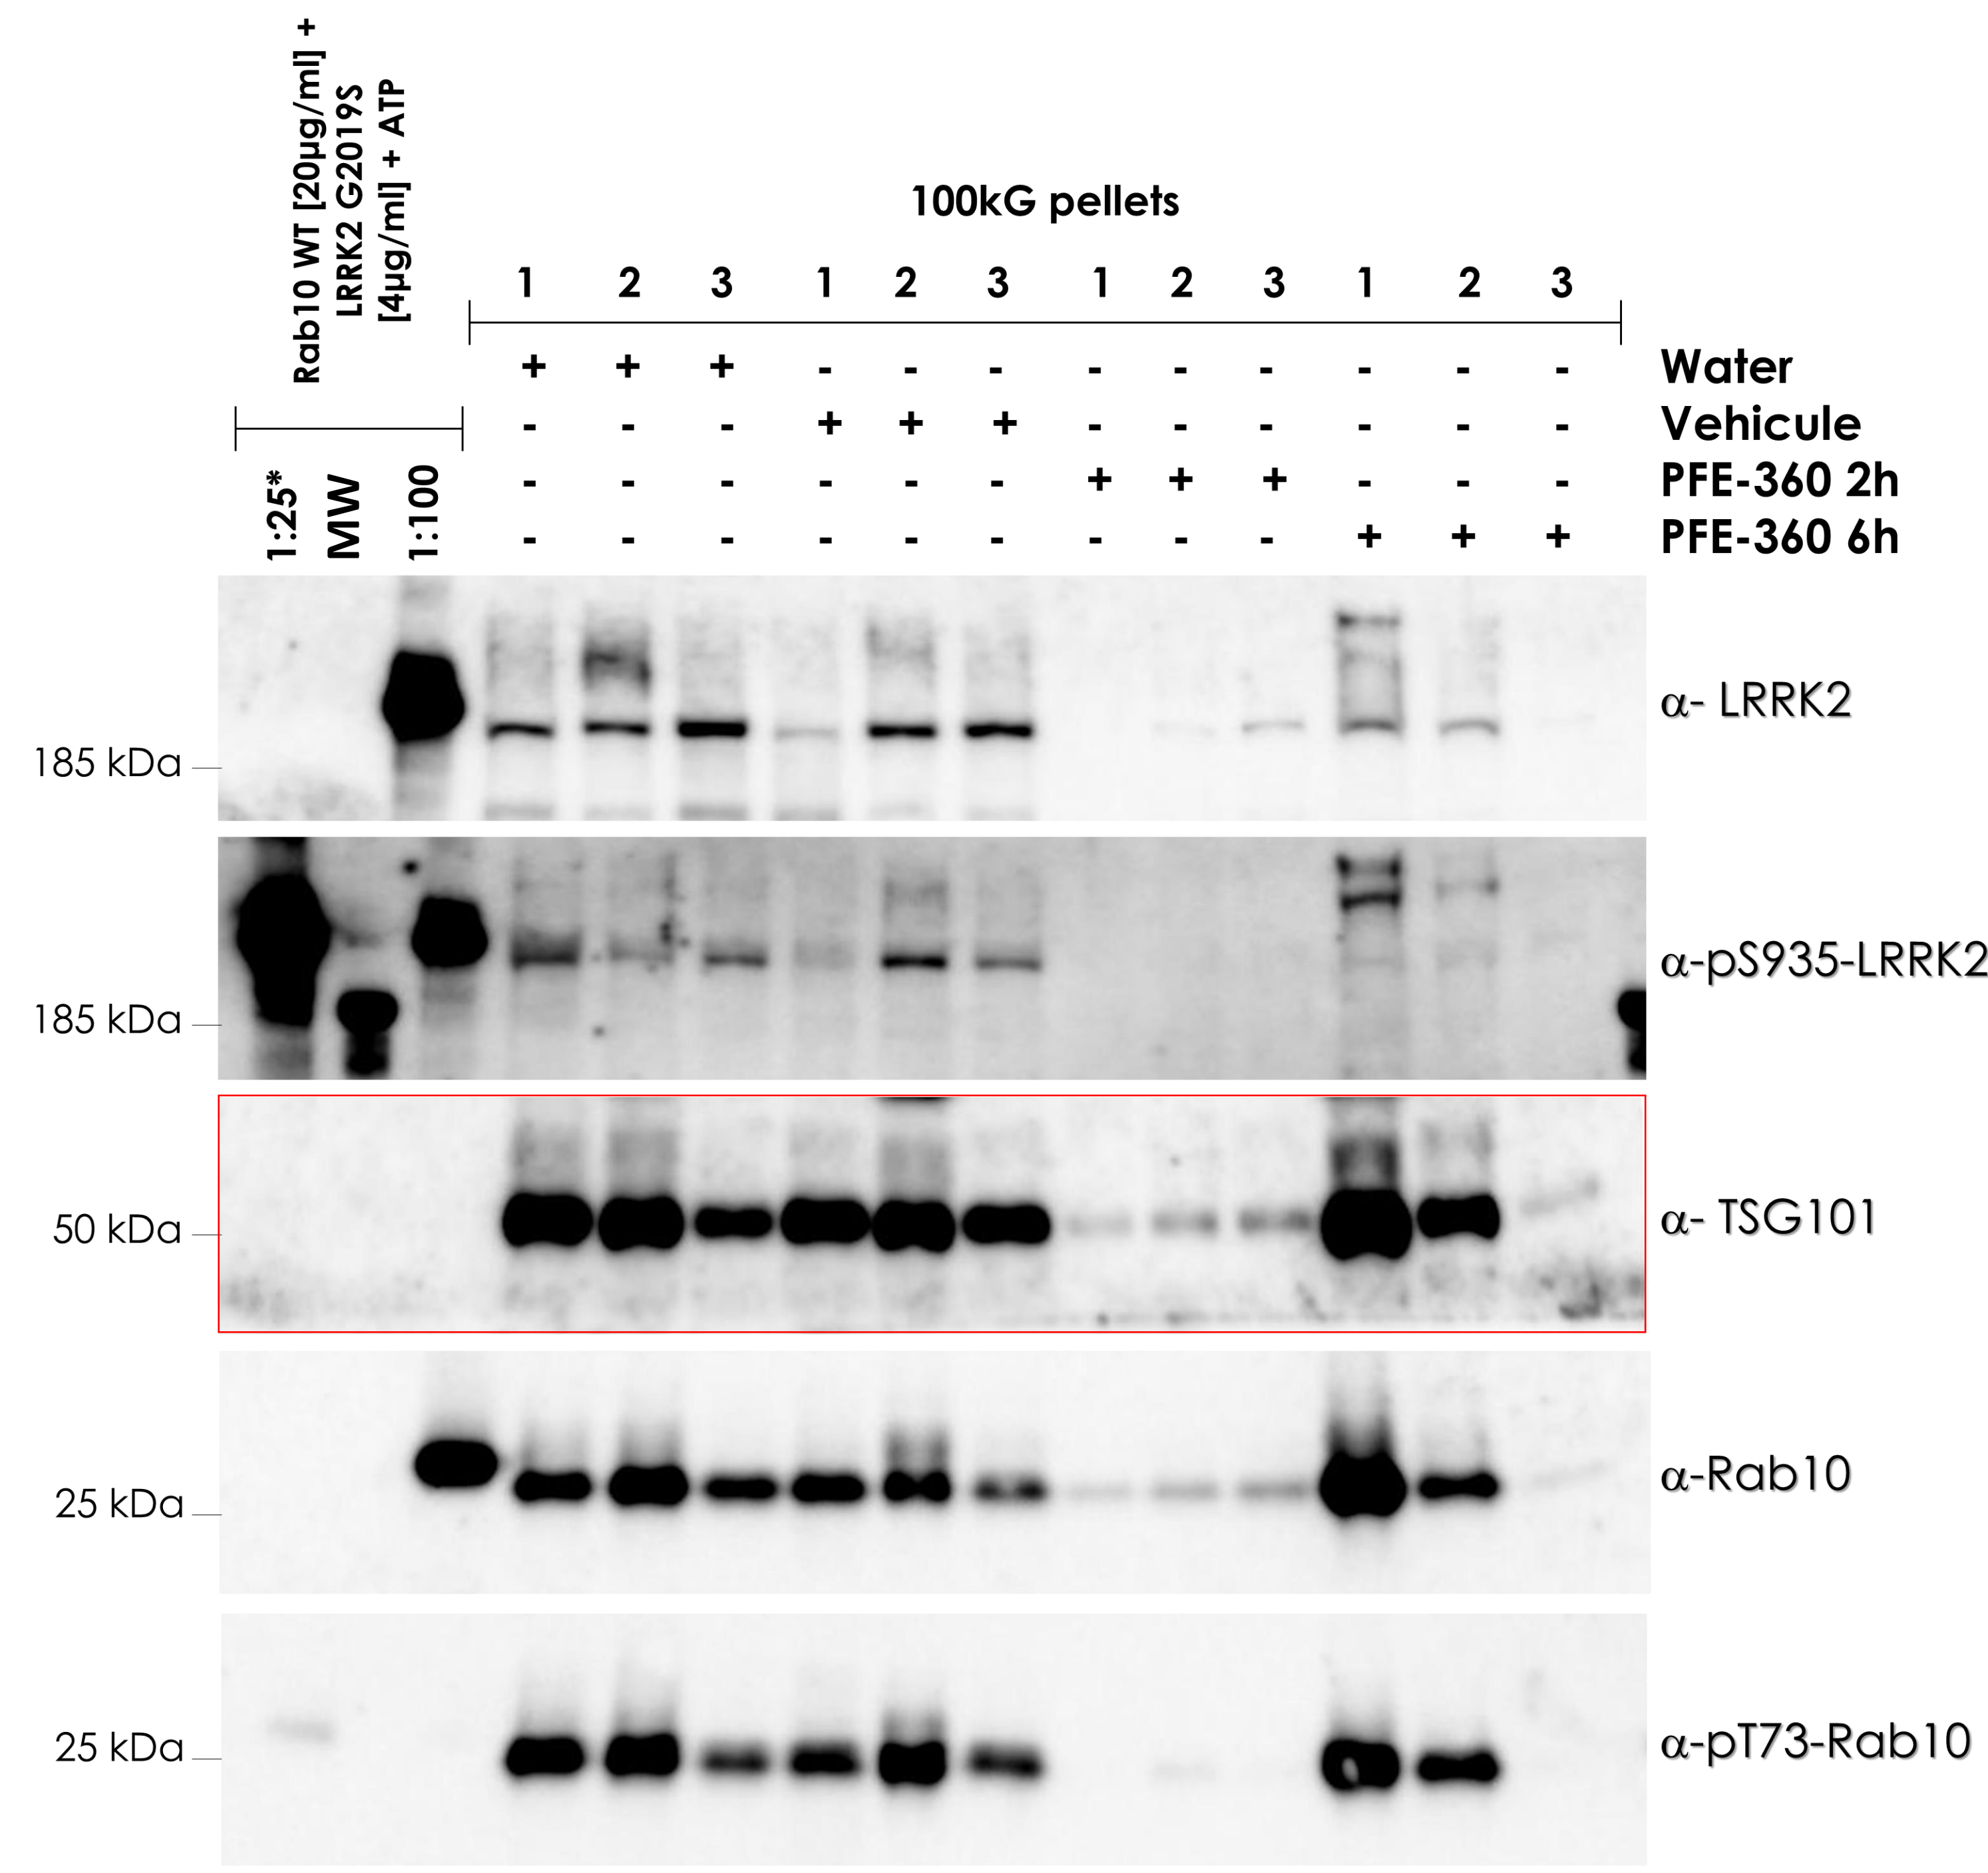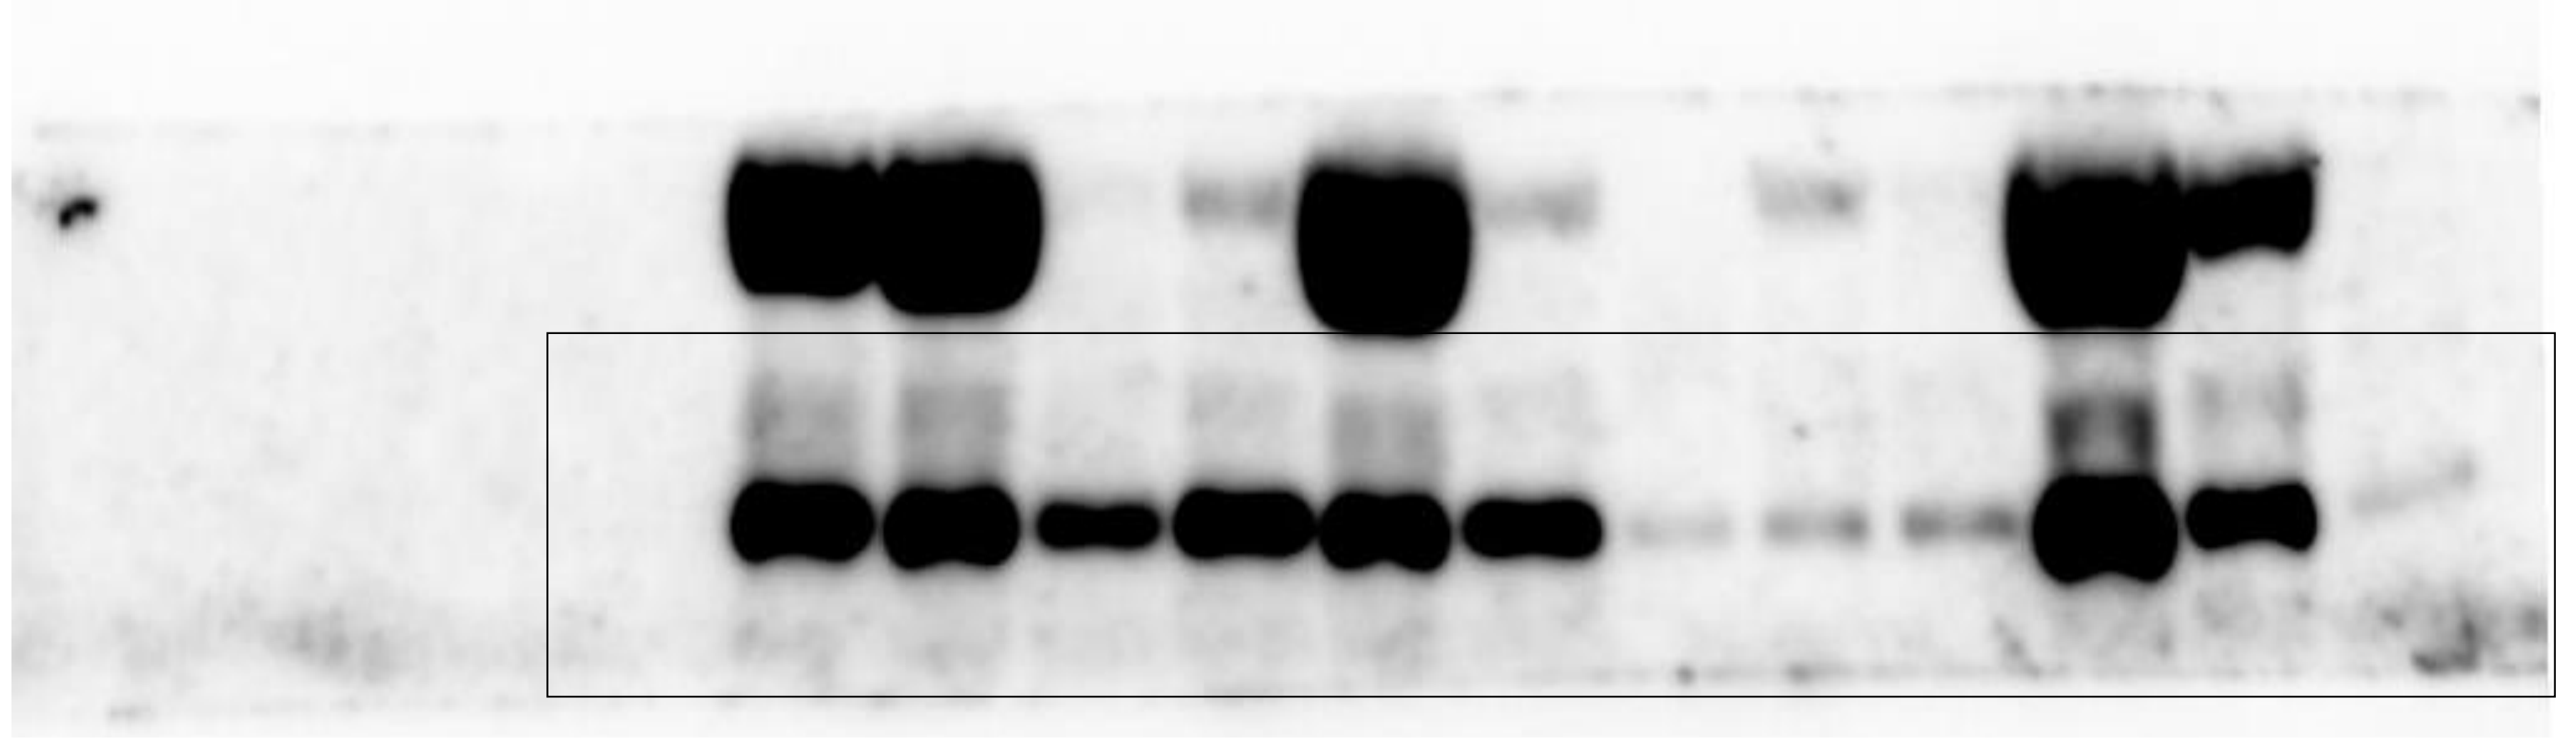

\*Only loaded for α-pS935-LRRK2 and α-pT73-Rab10 antibodies

Figure 6a

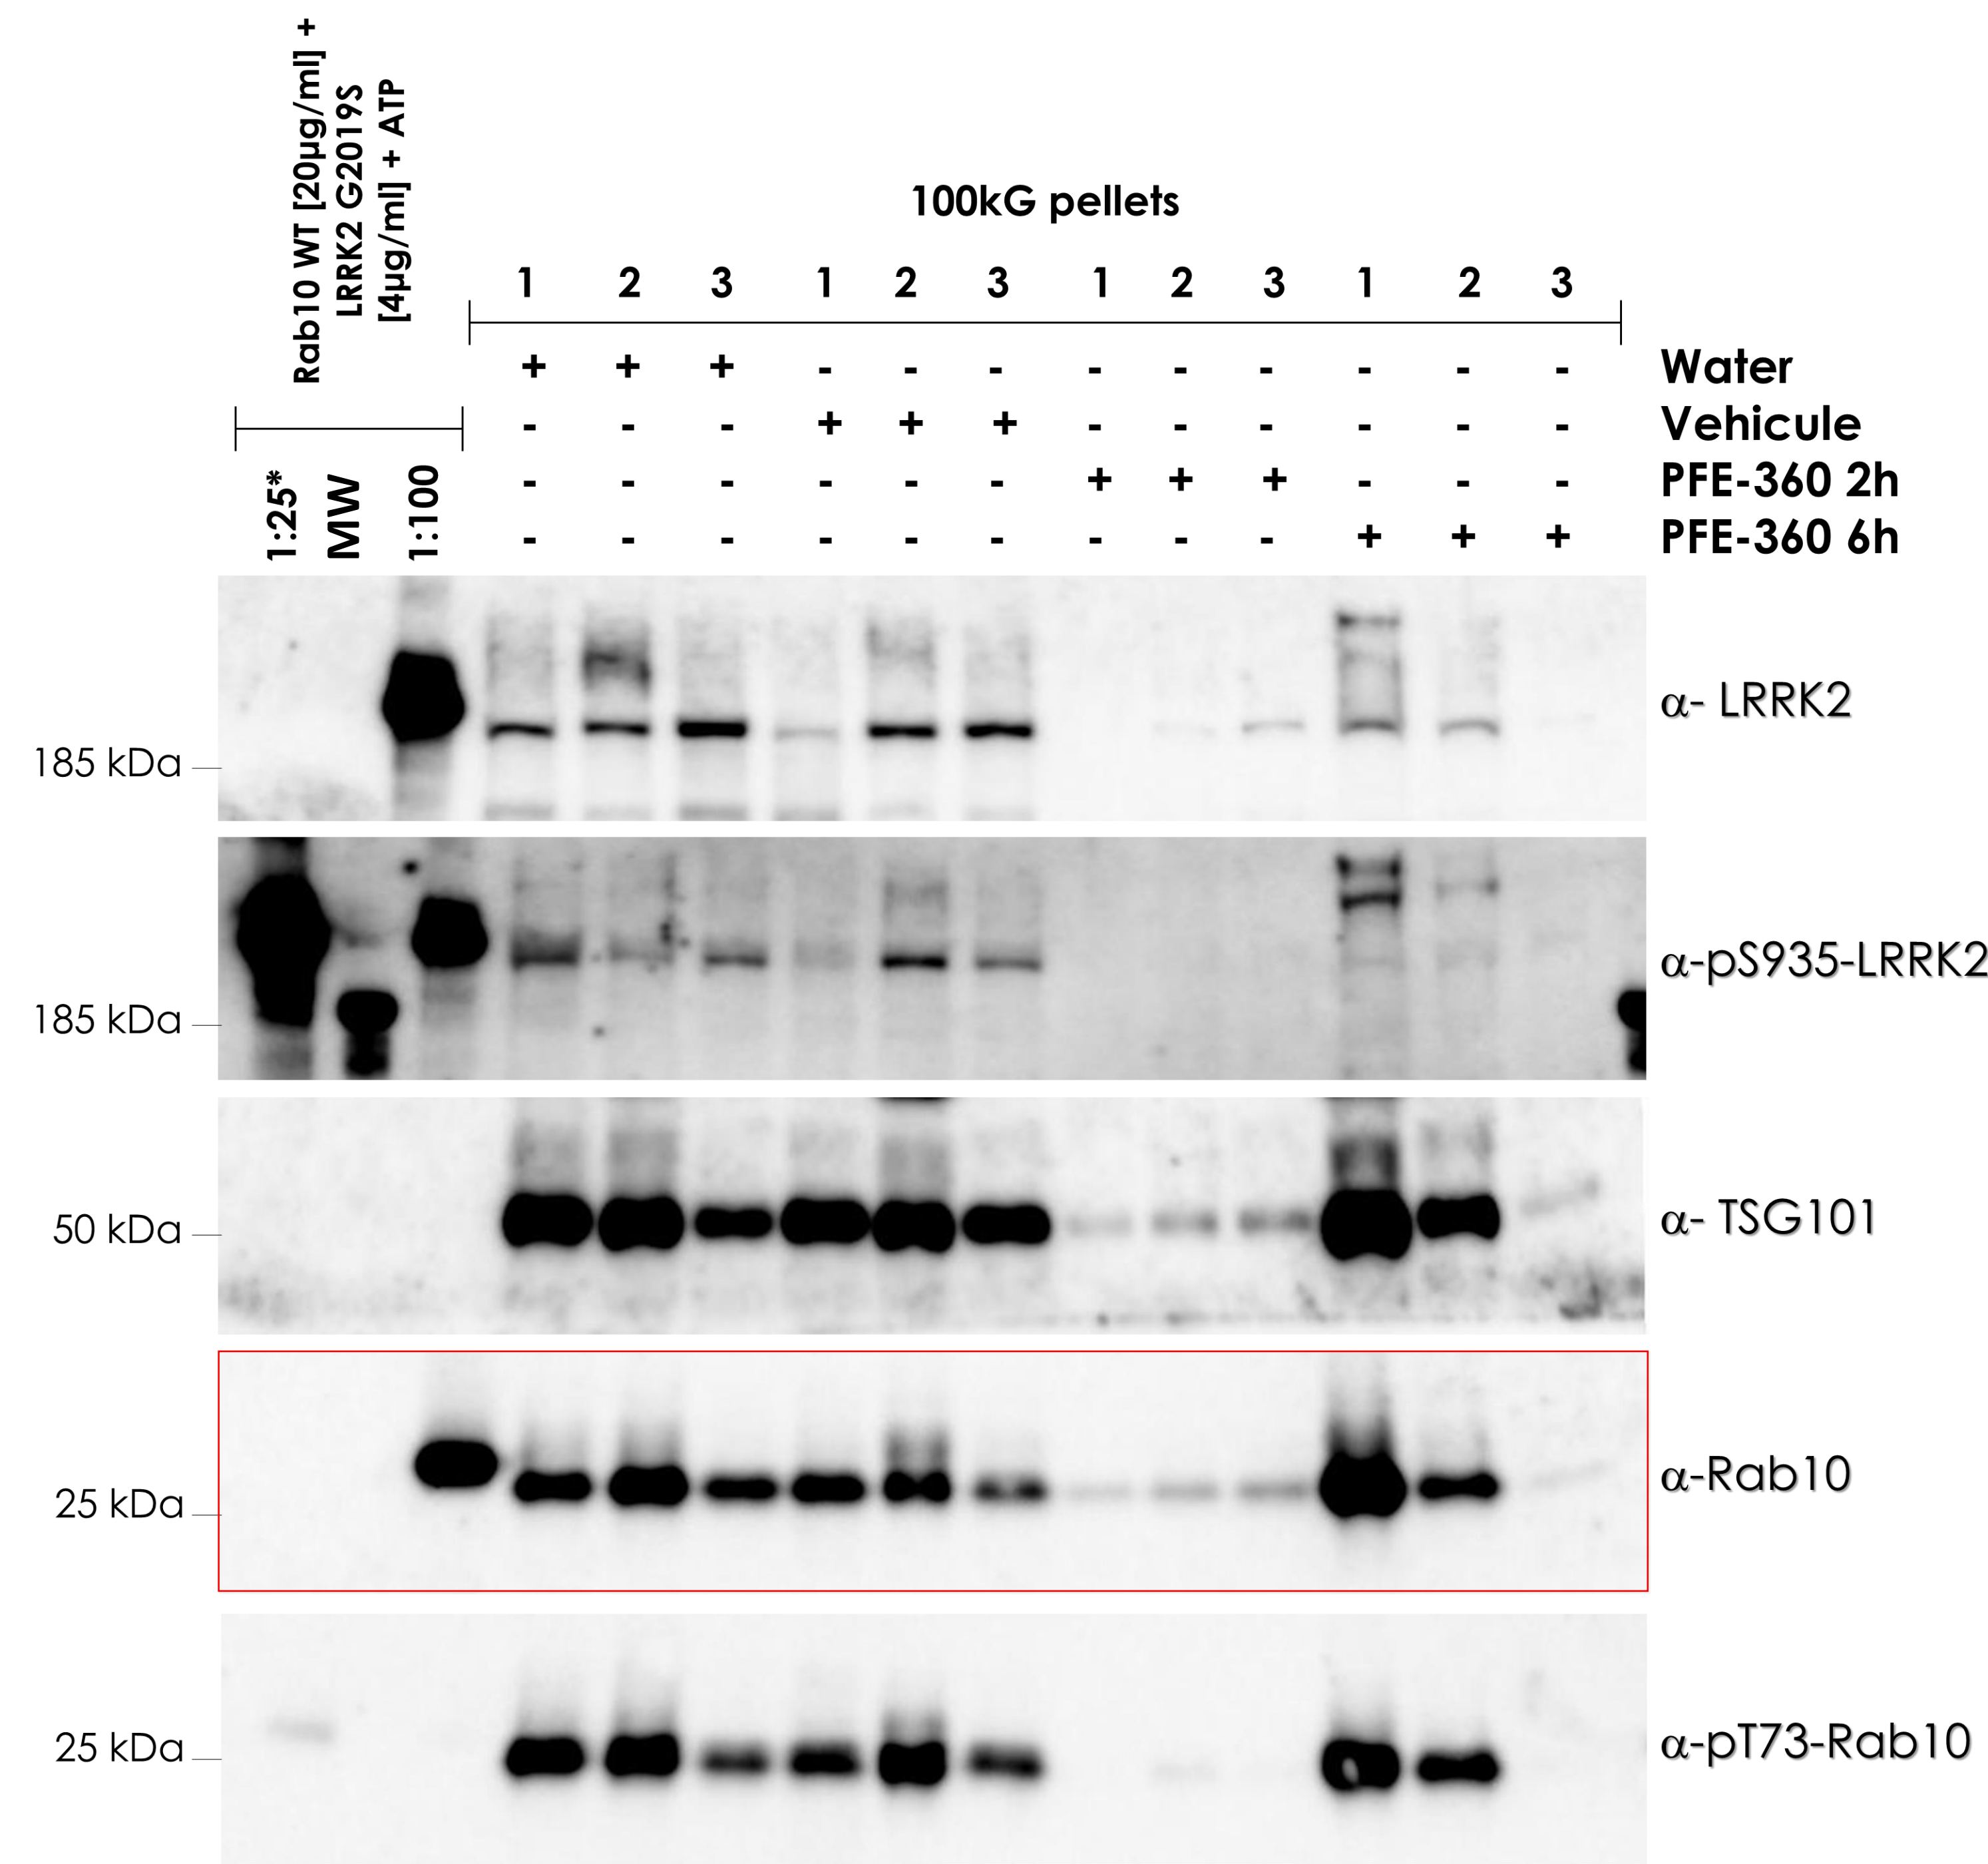

\*Only loaded for α-pS935-LRRK2 and α-pT73-Rab10 antibodies

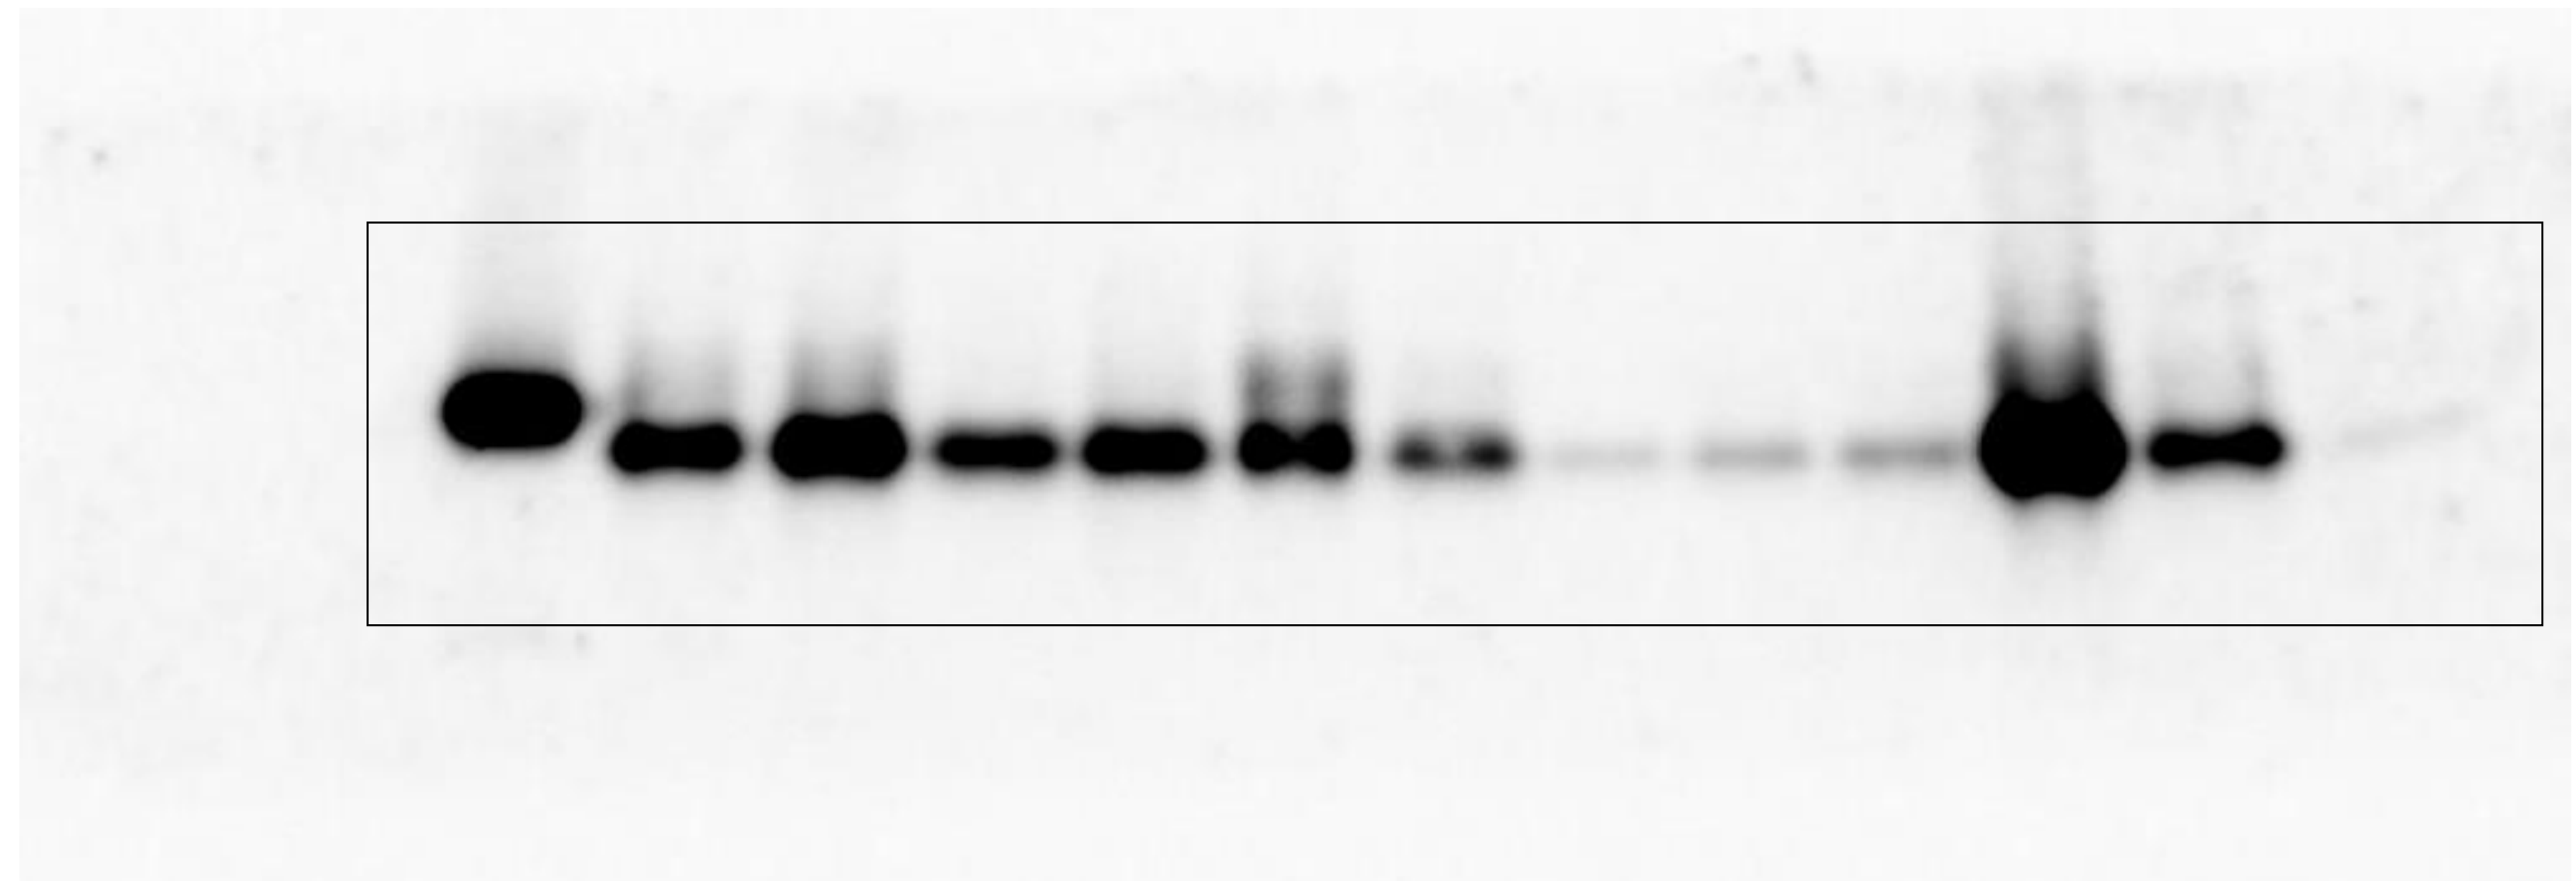

Figure 6a

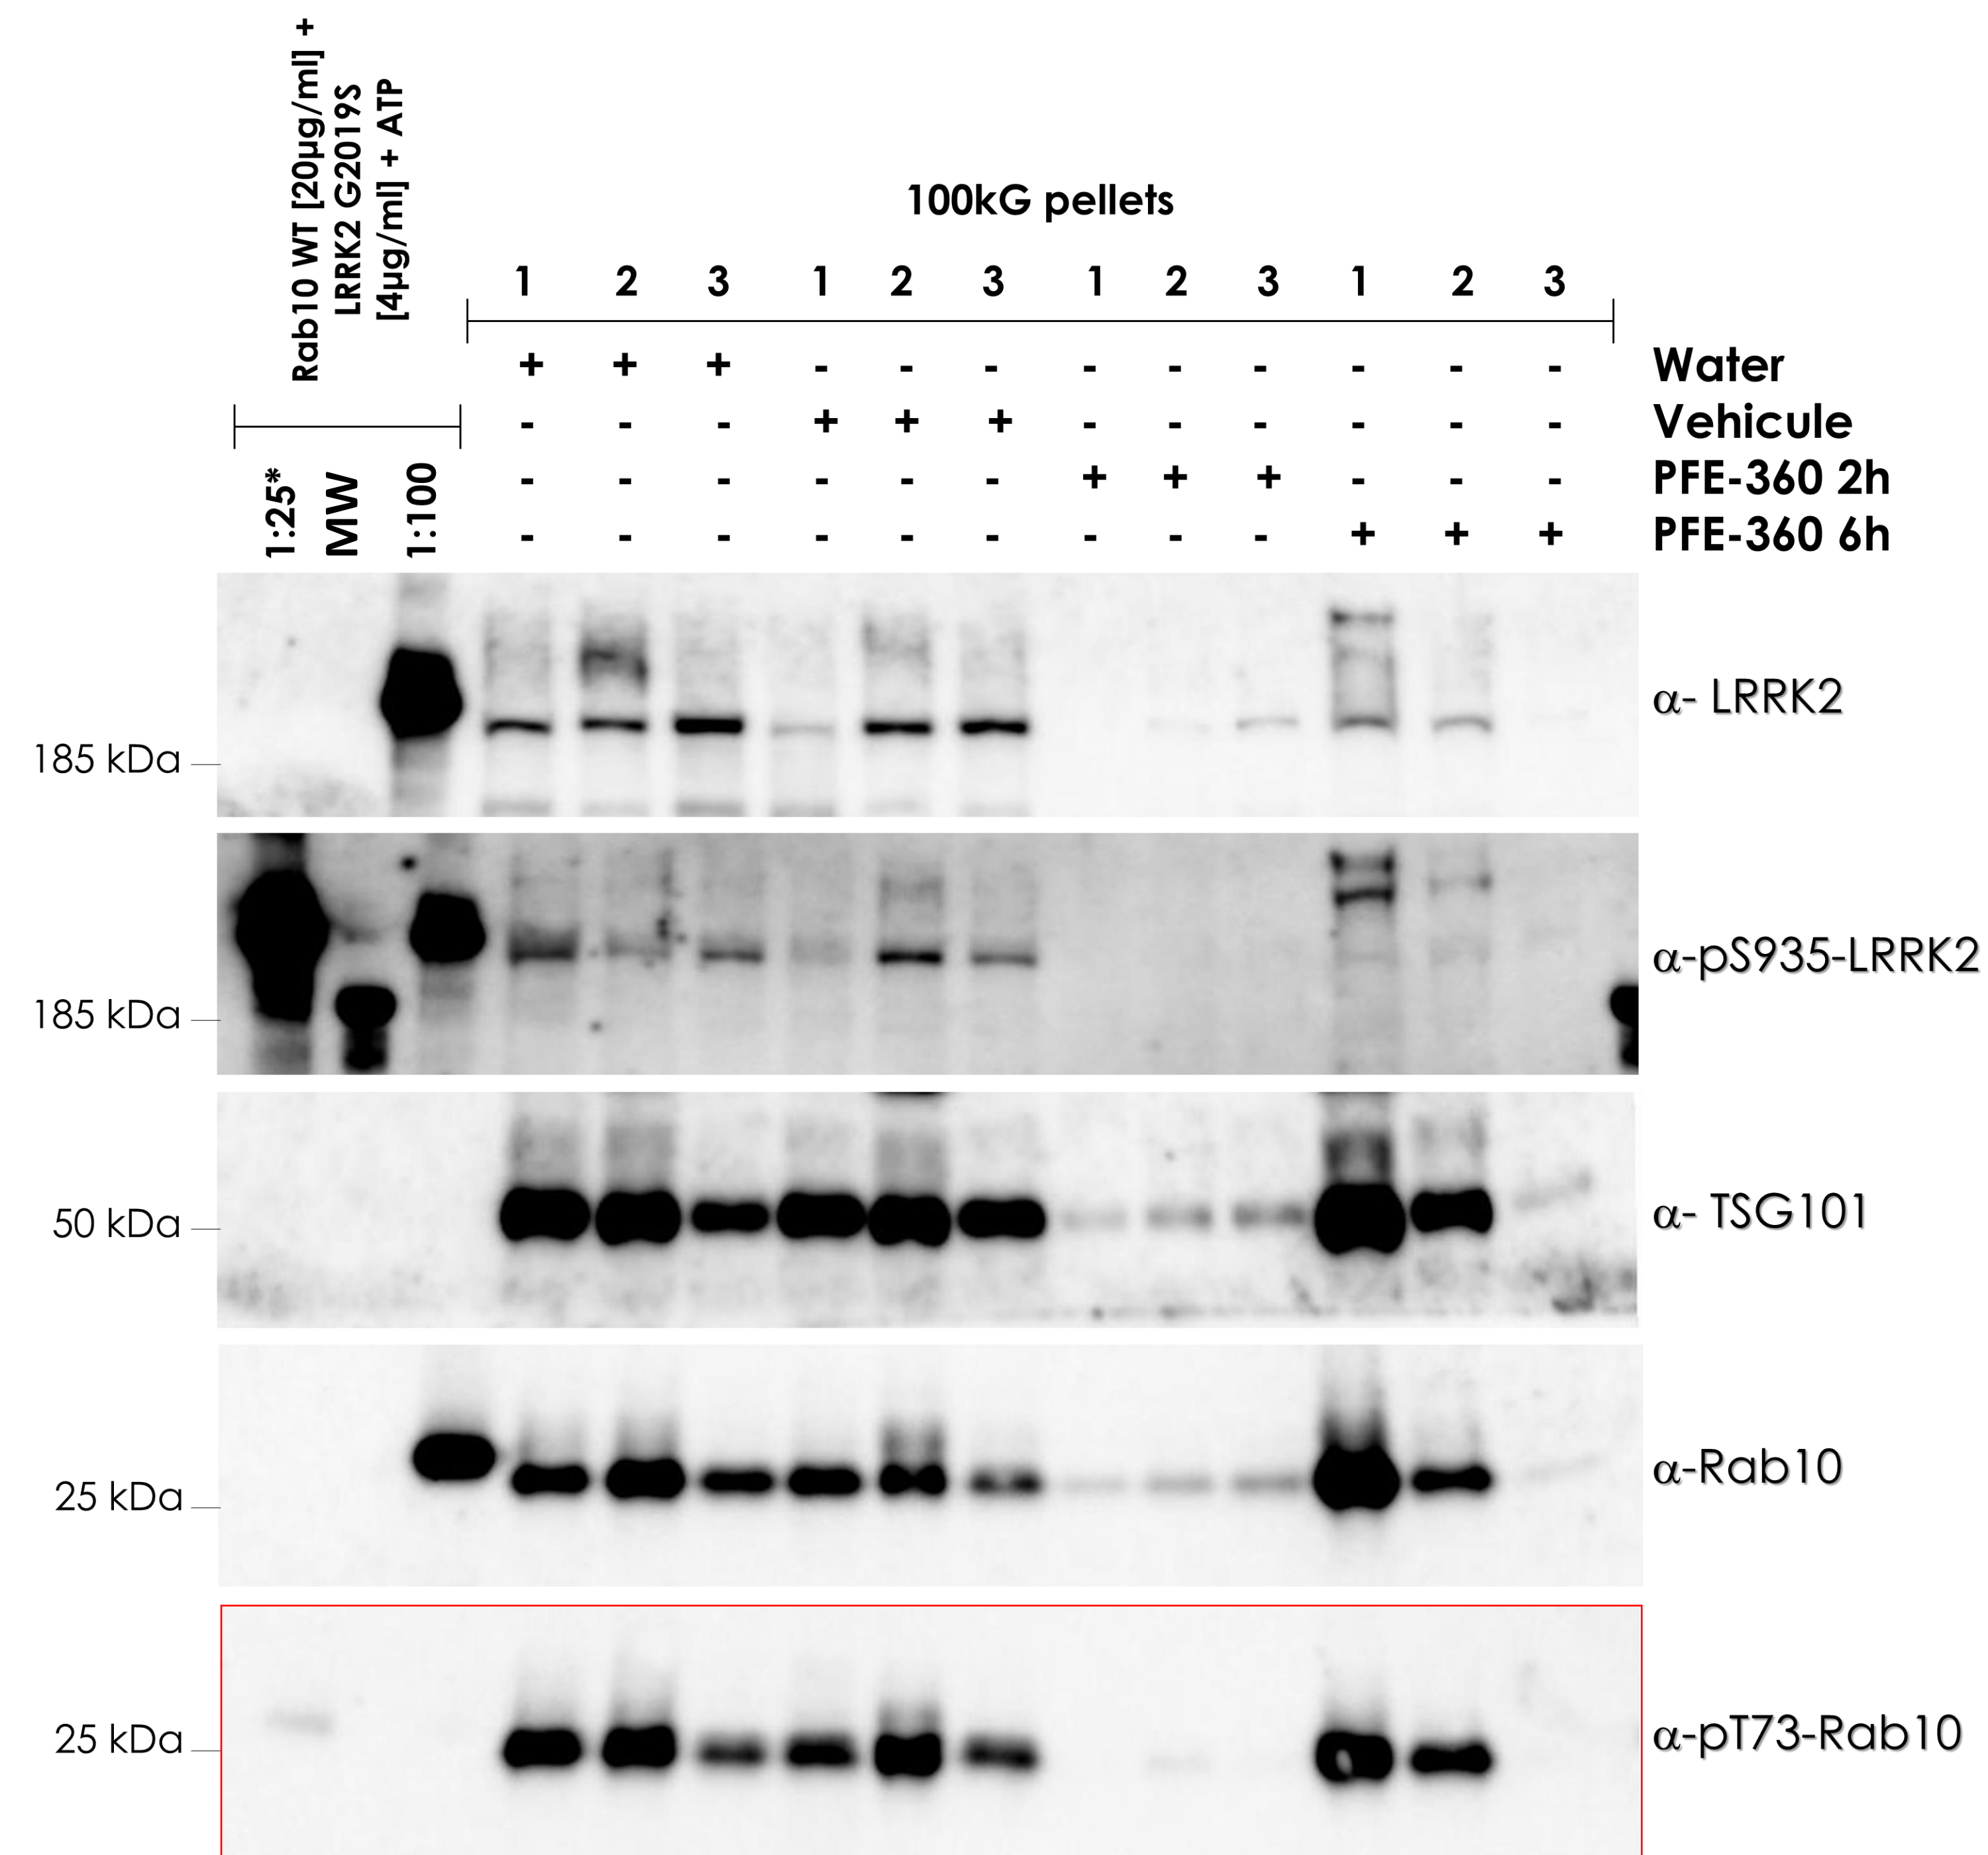

\*Only loaded for  $\alpha$ -pS935-LRRK2 and  $\alpha$ -pT73-Rab10 antibodies

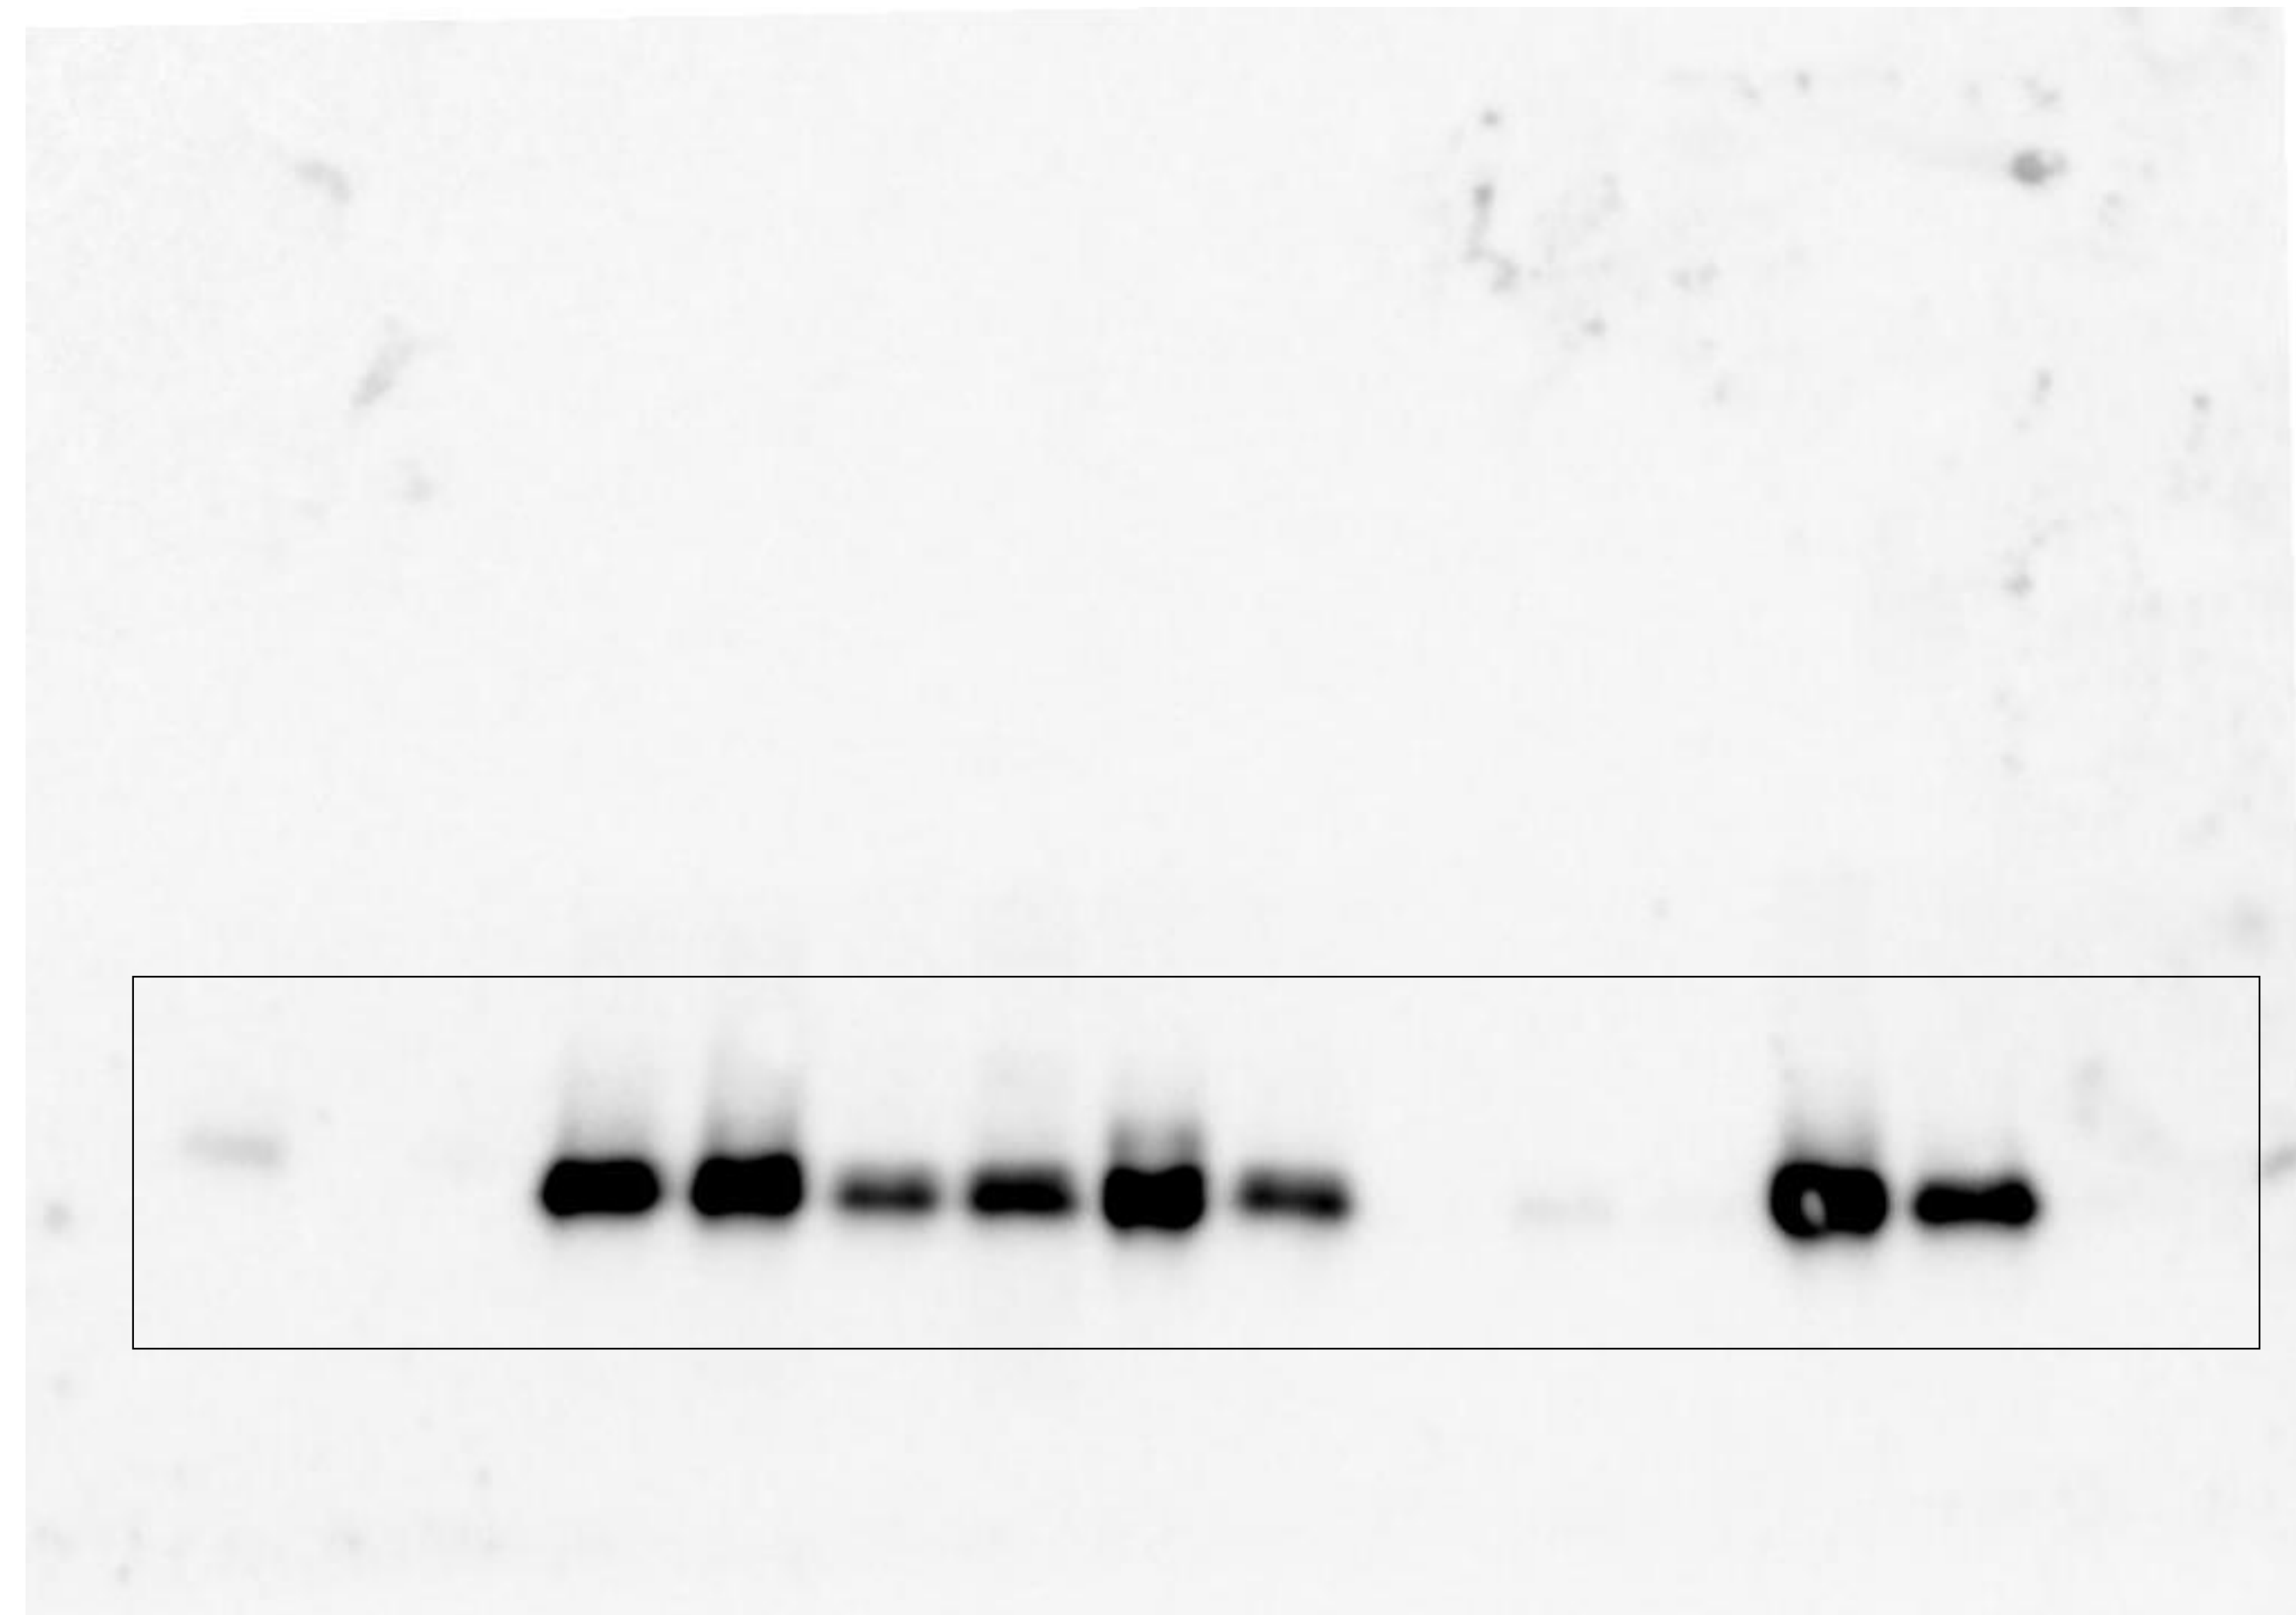



Suppl Figure 1b

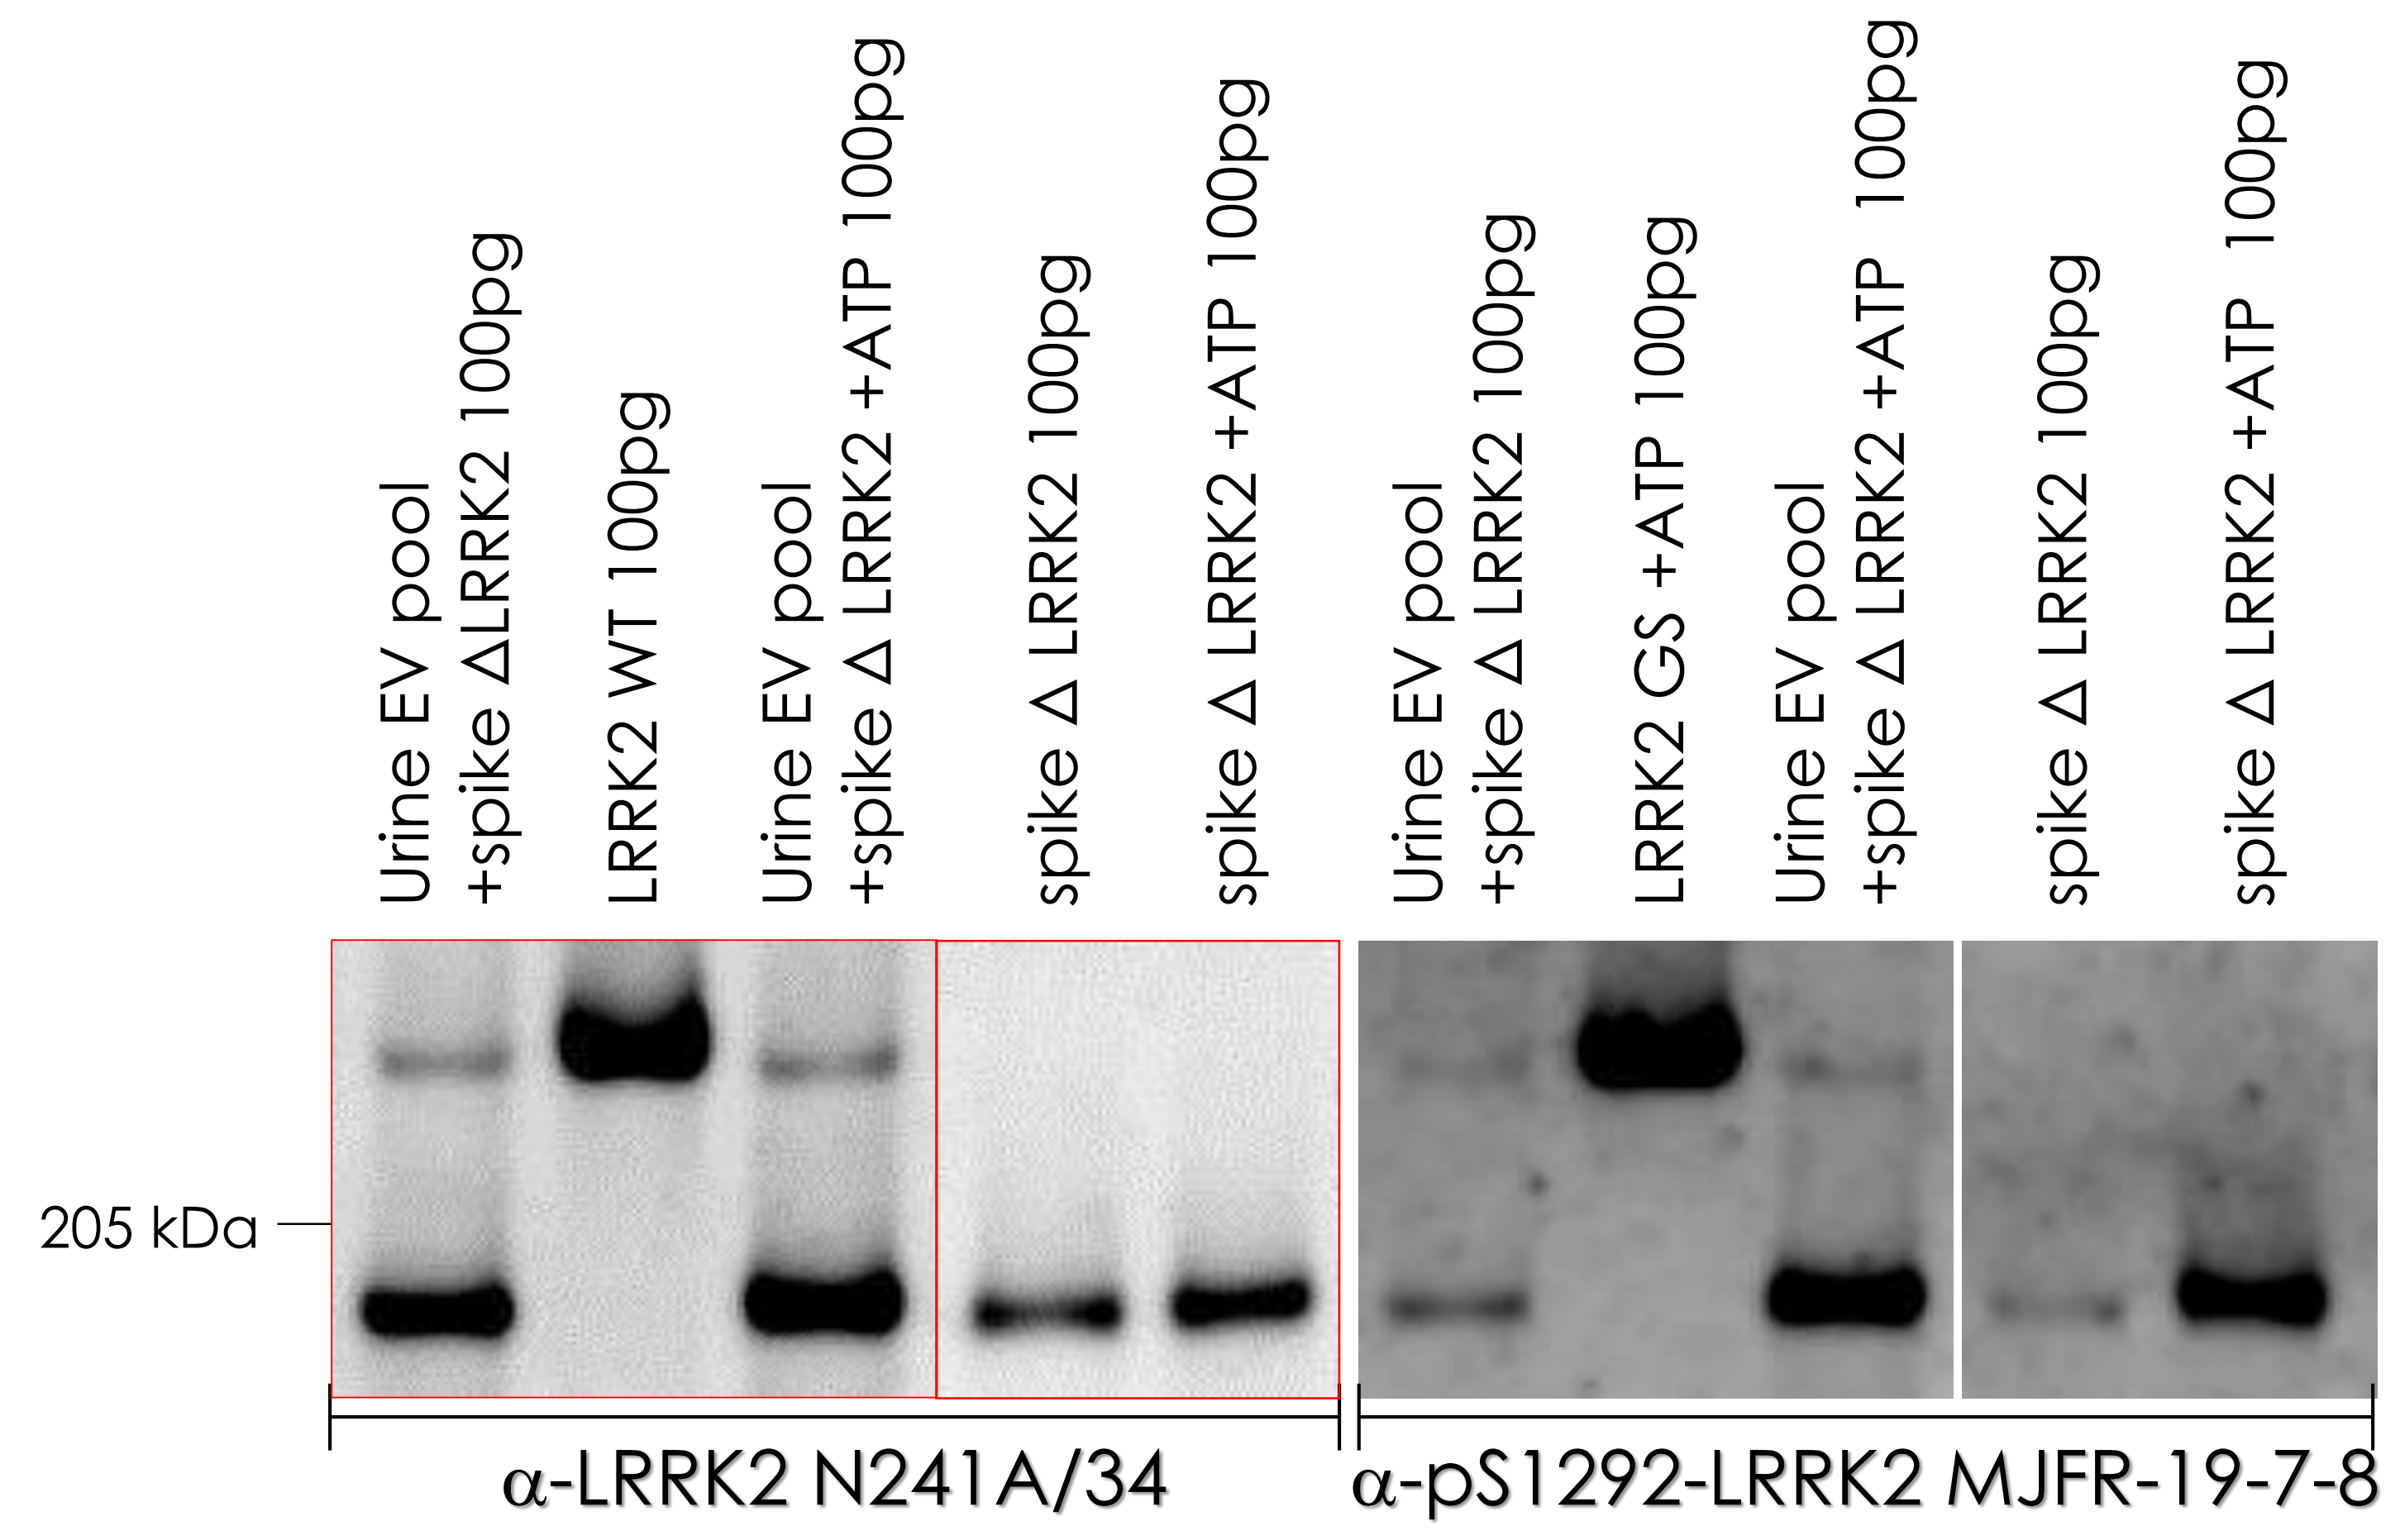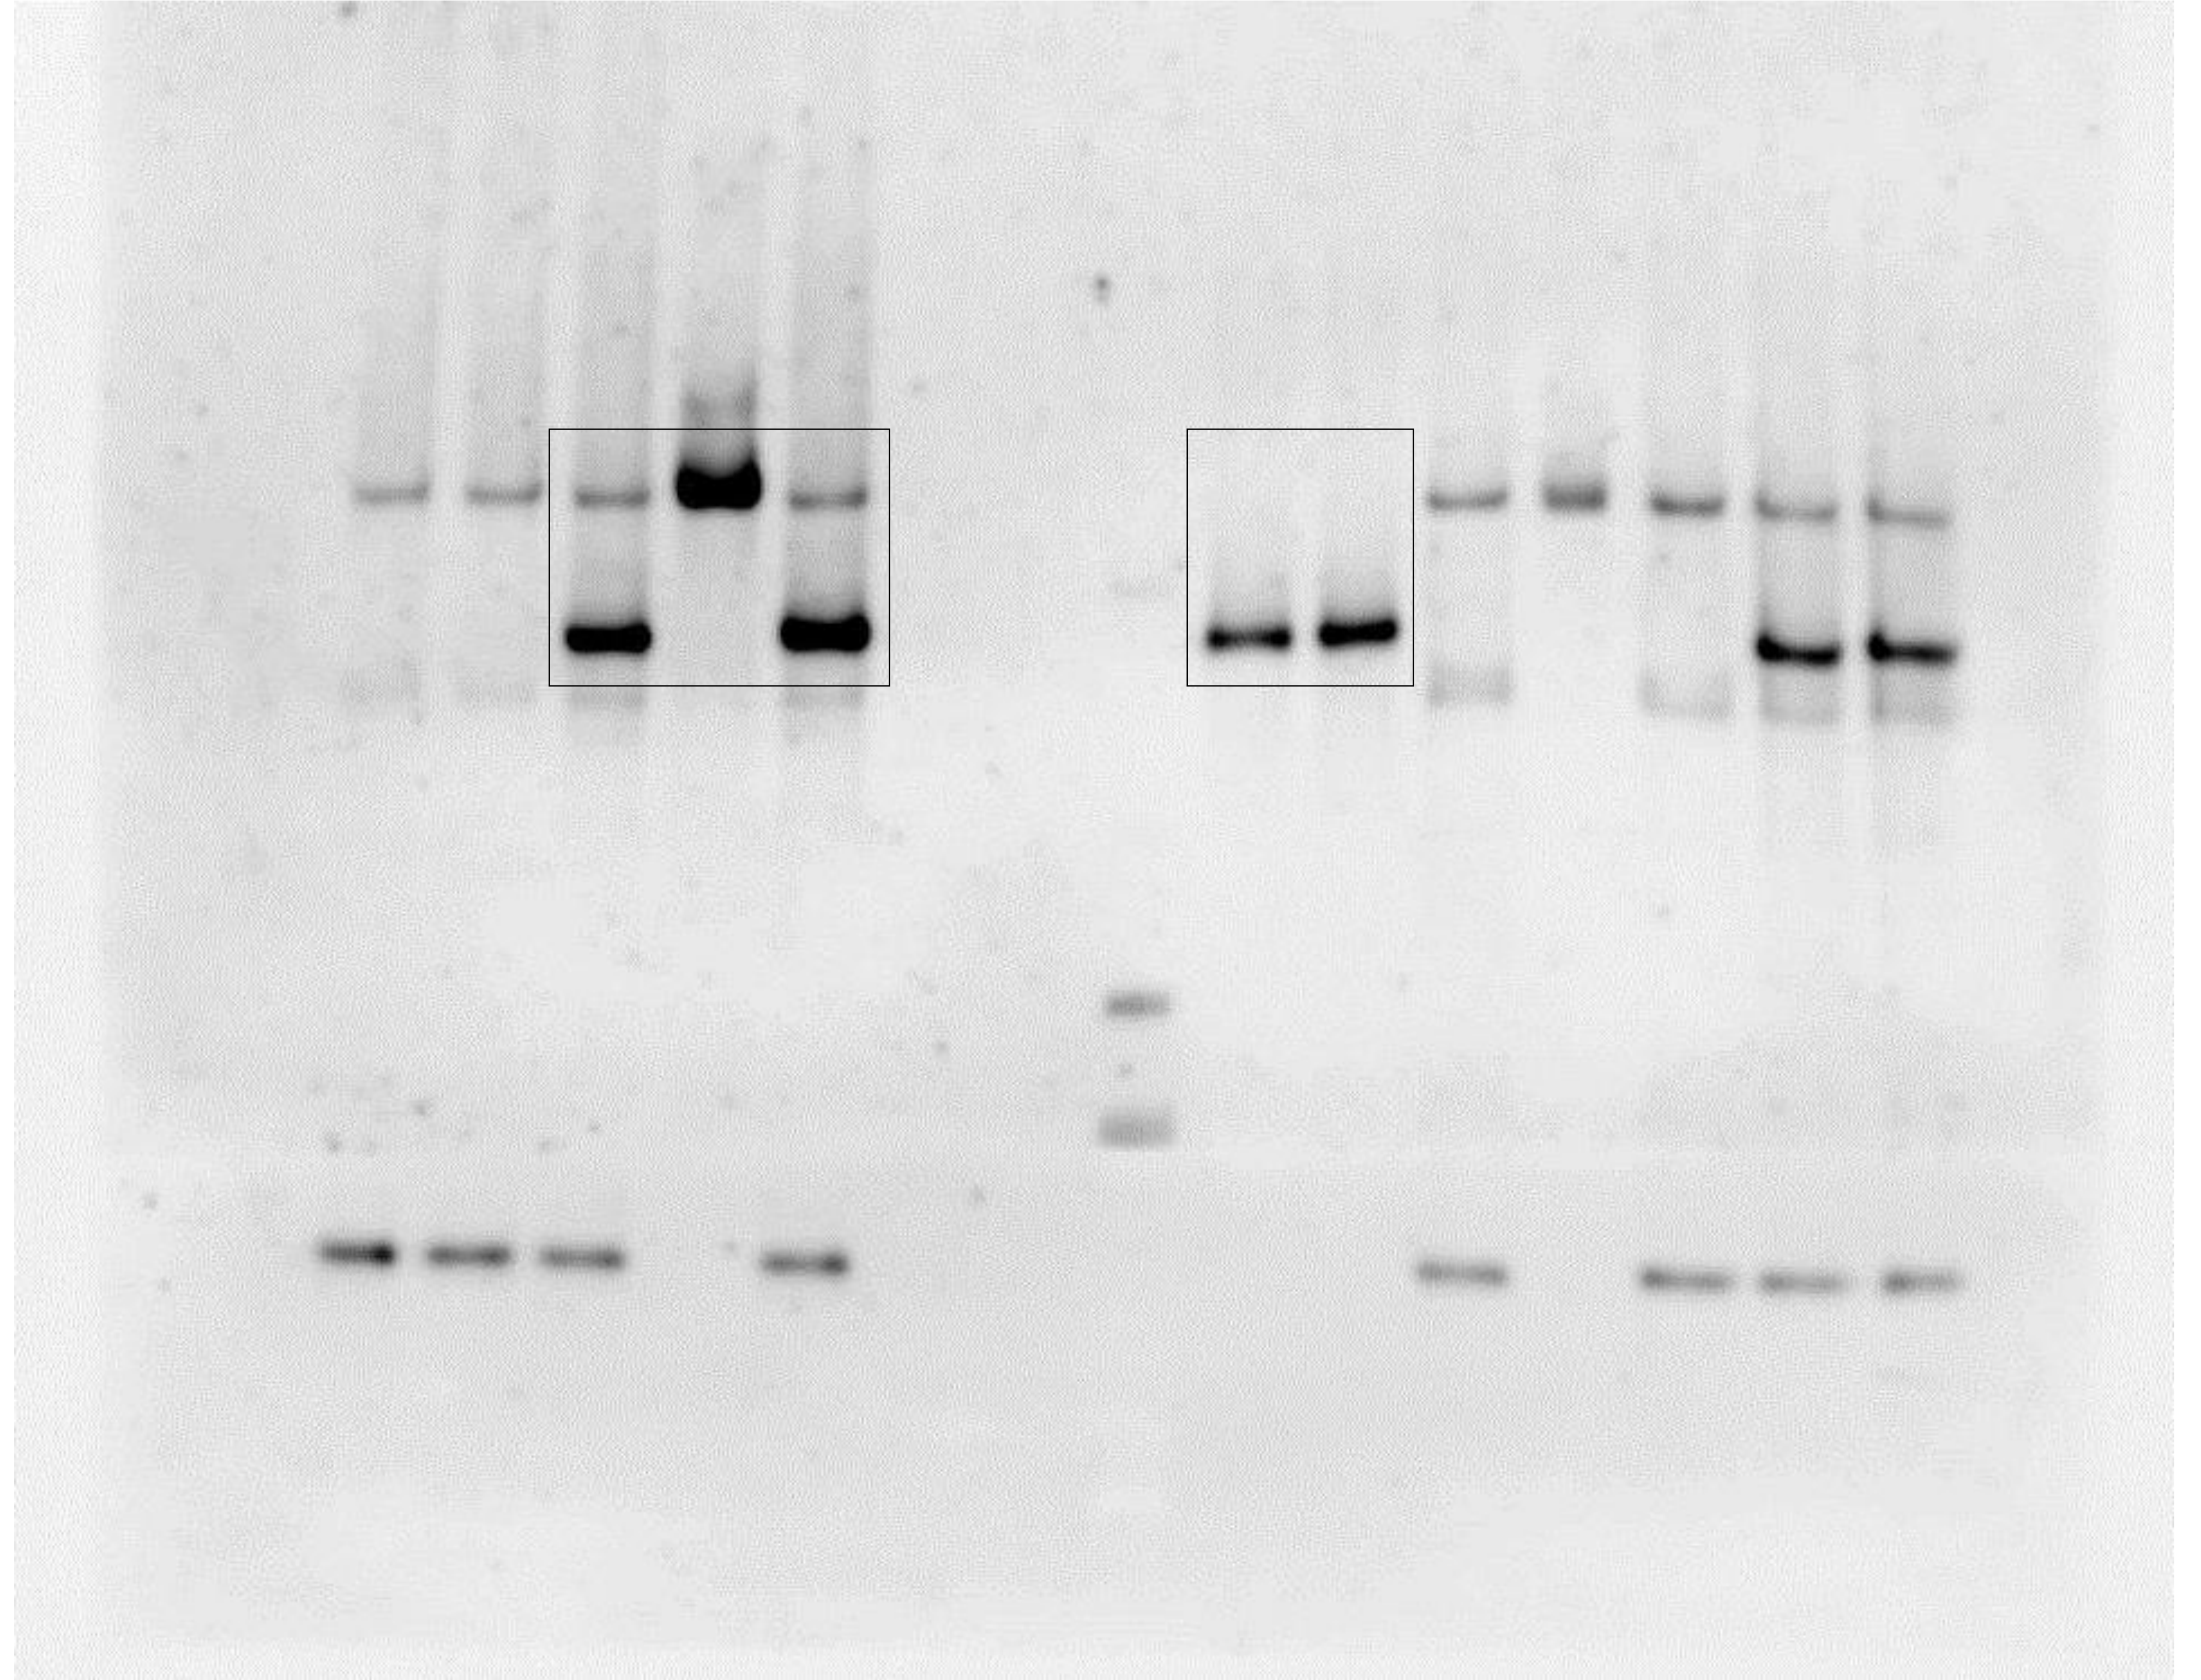

Suppl Figure 1b

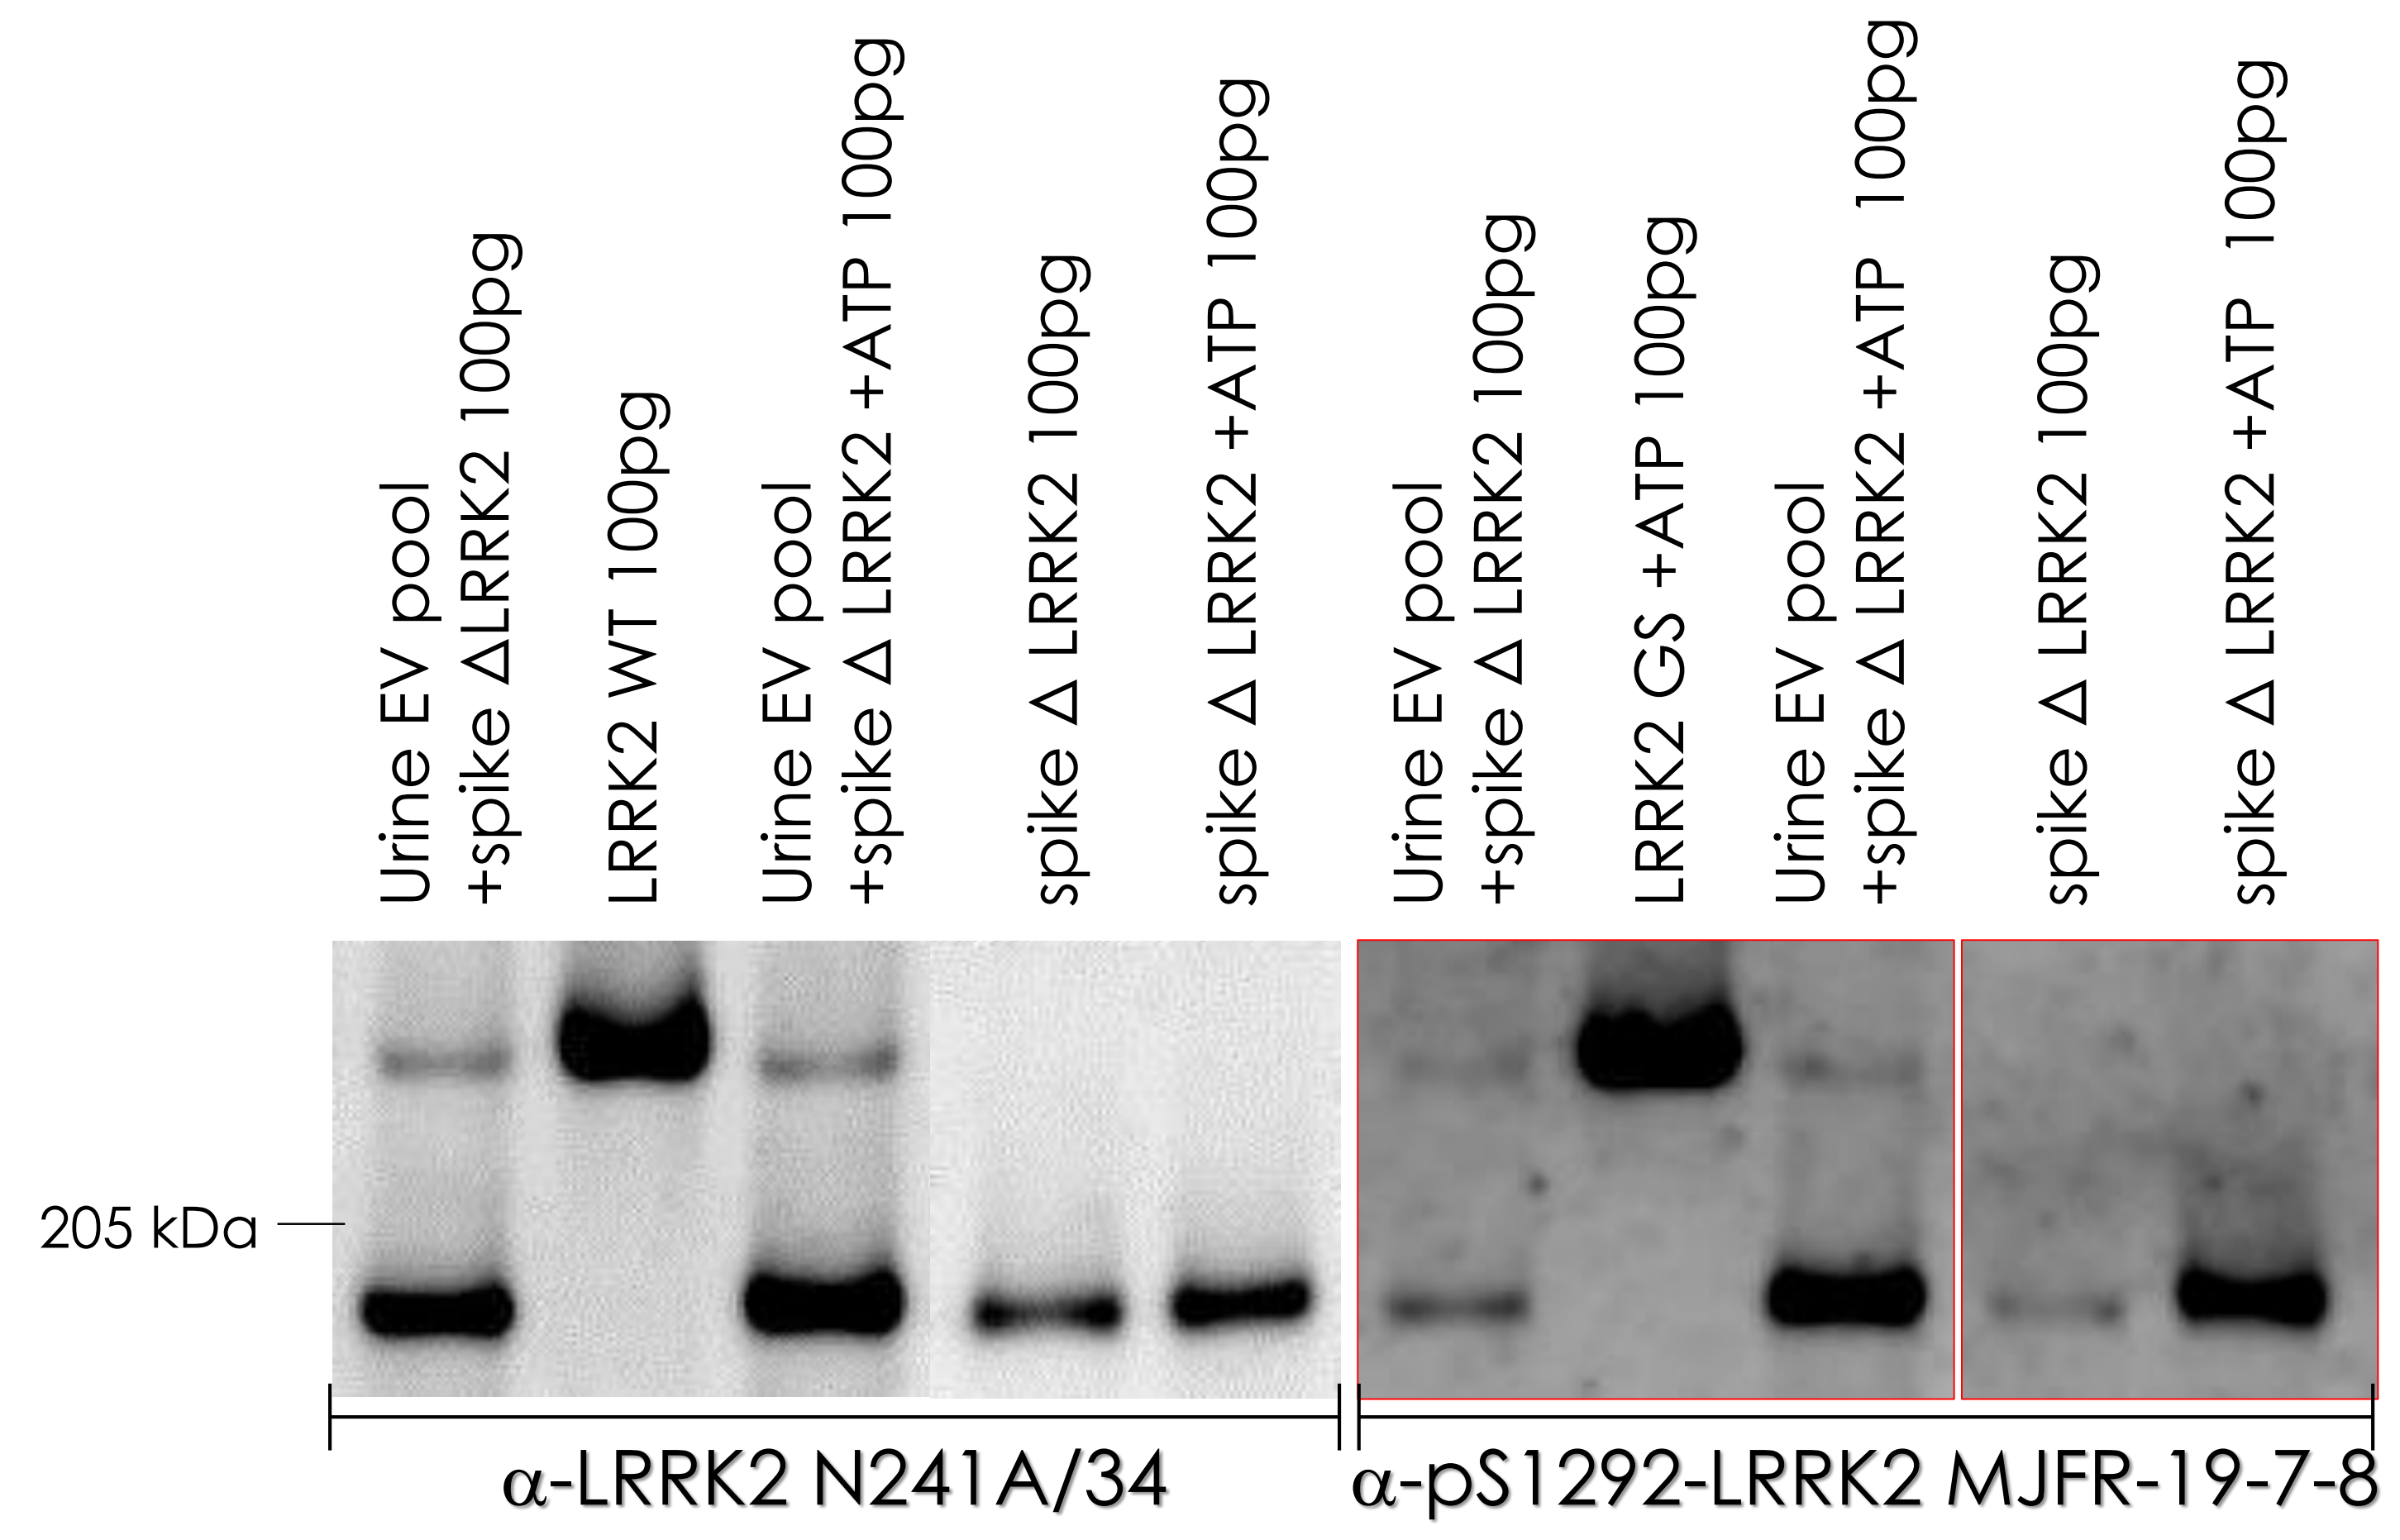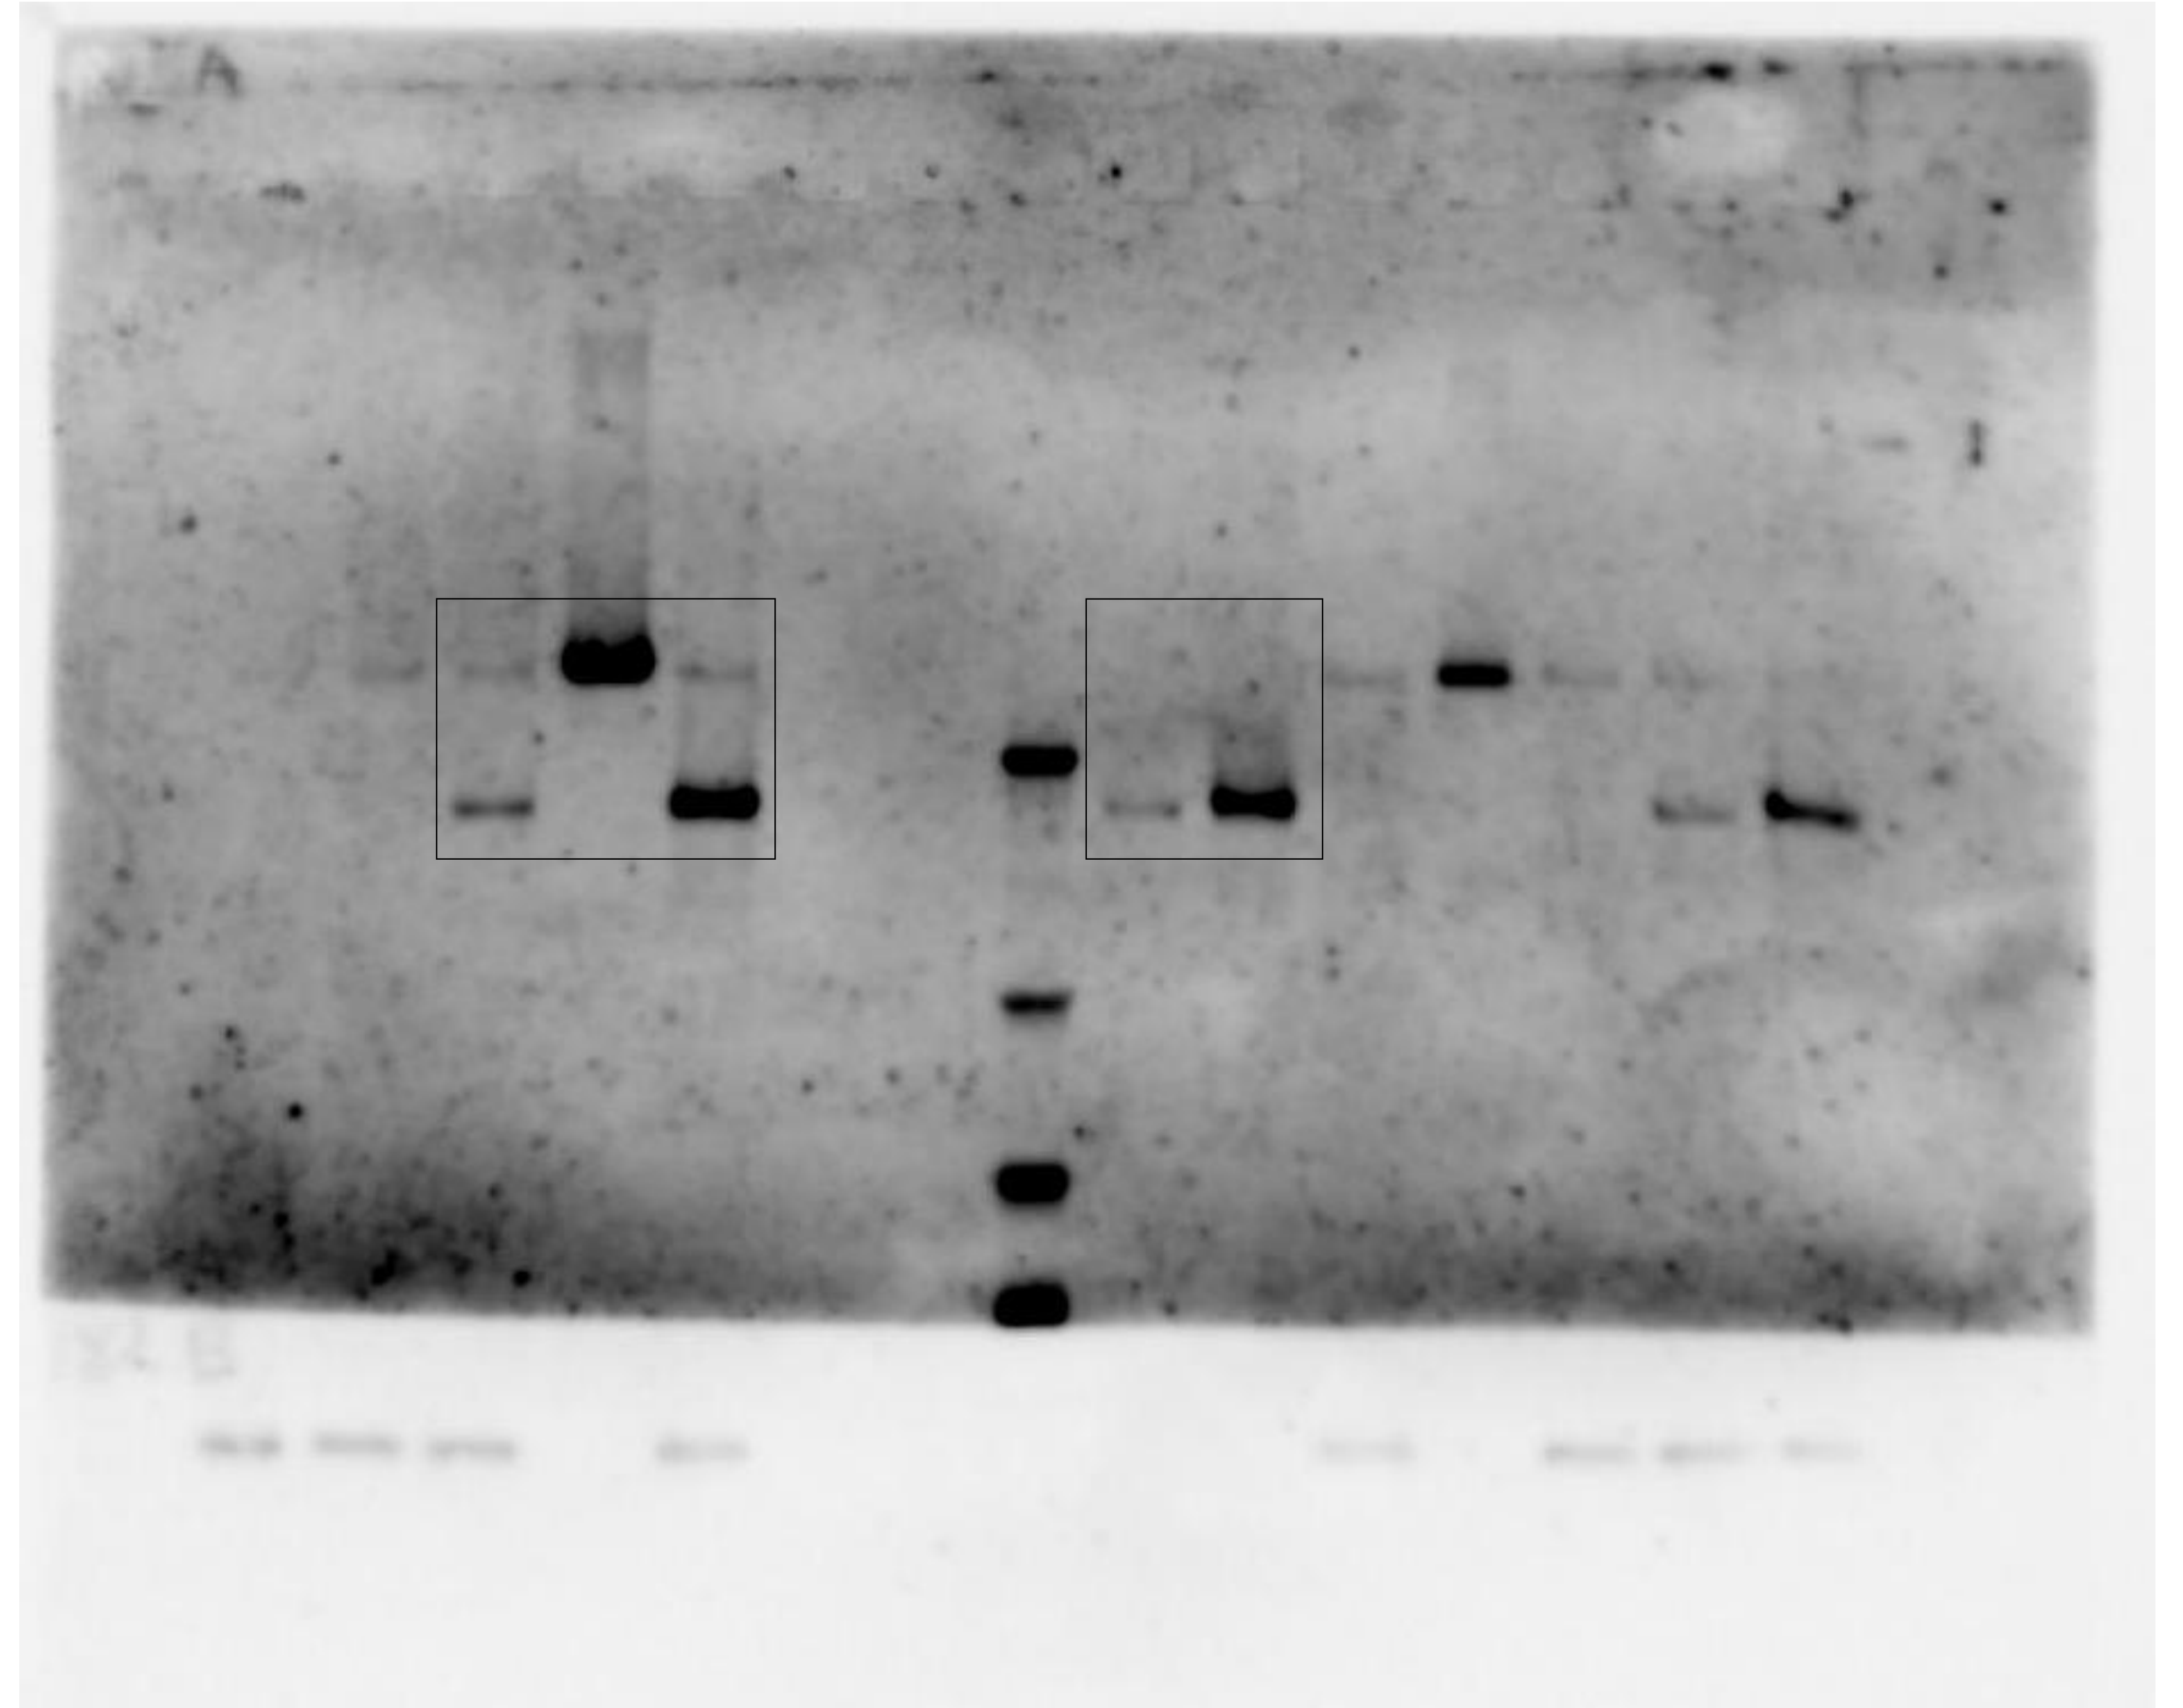

Suppl Figure 3a

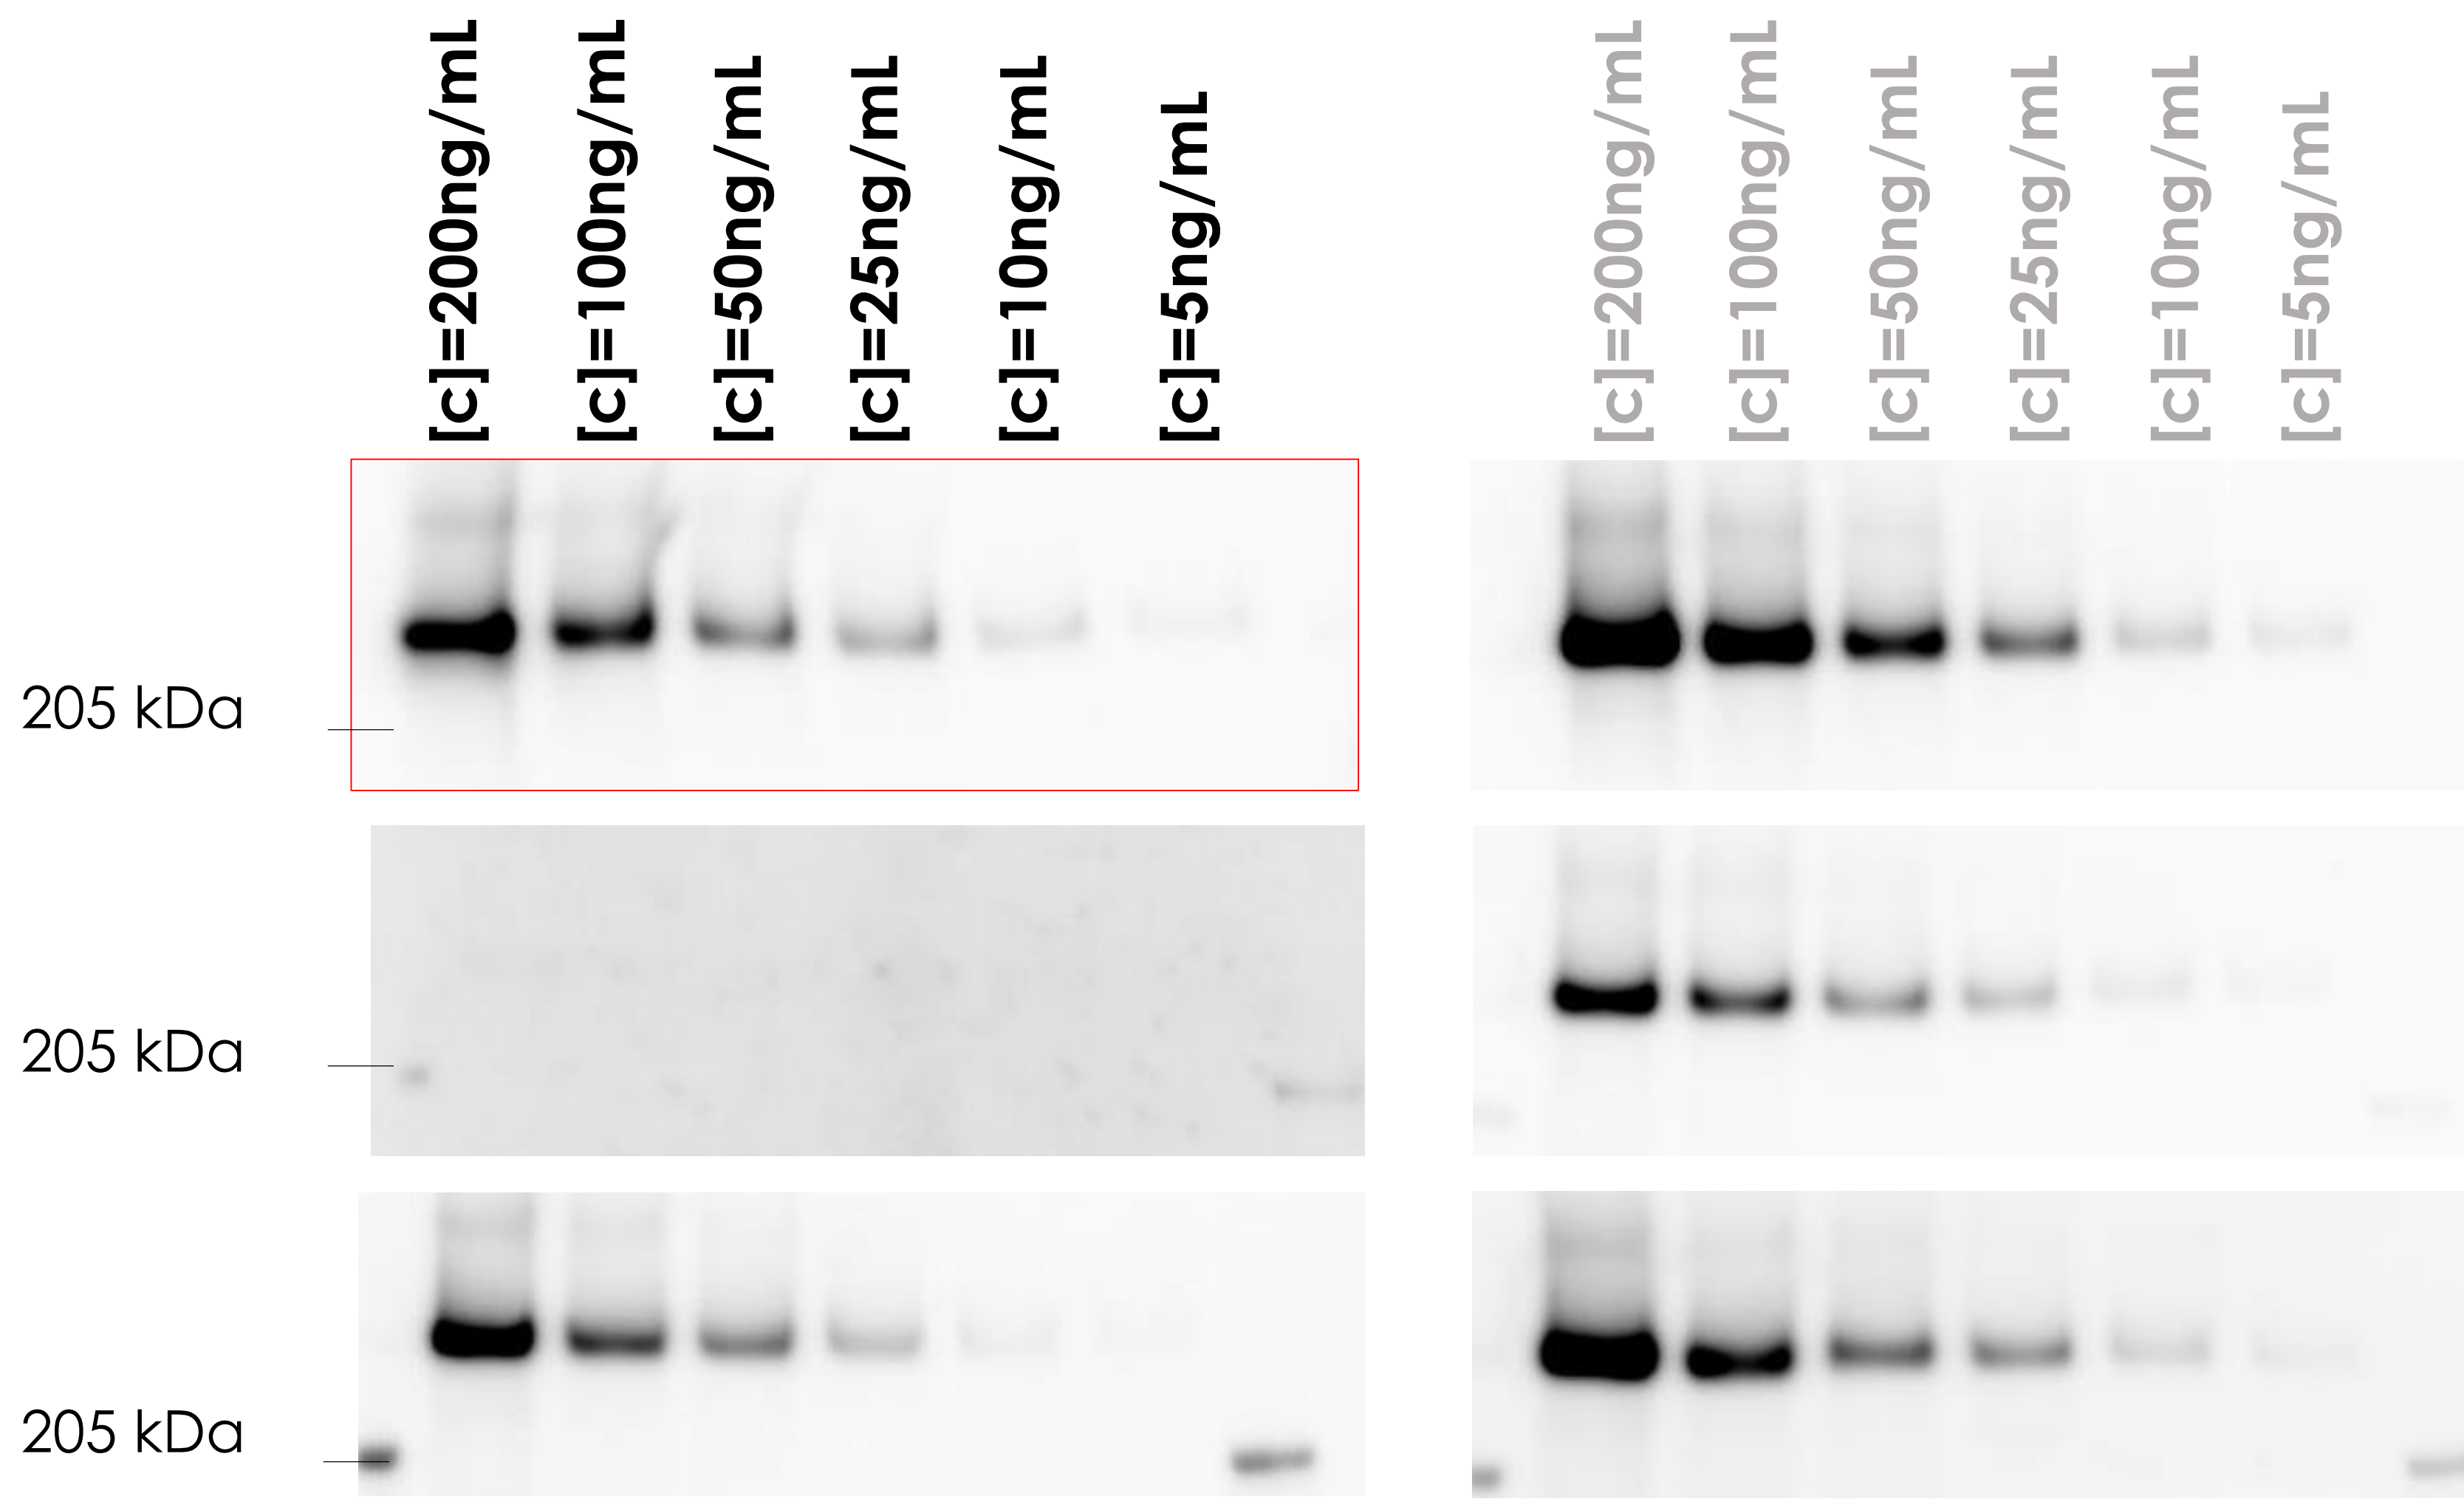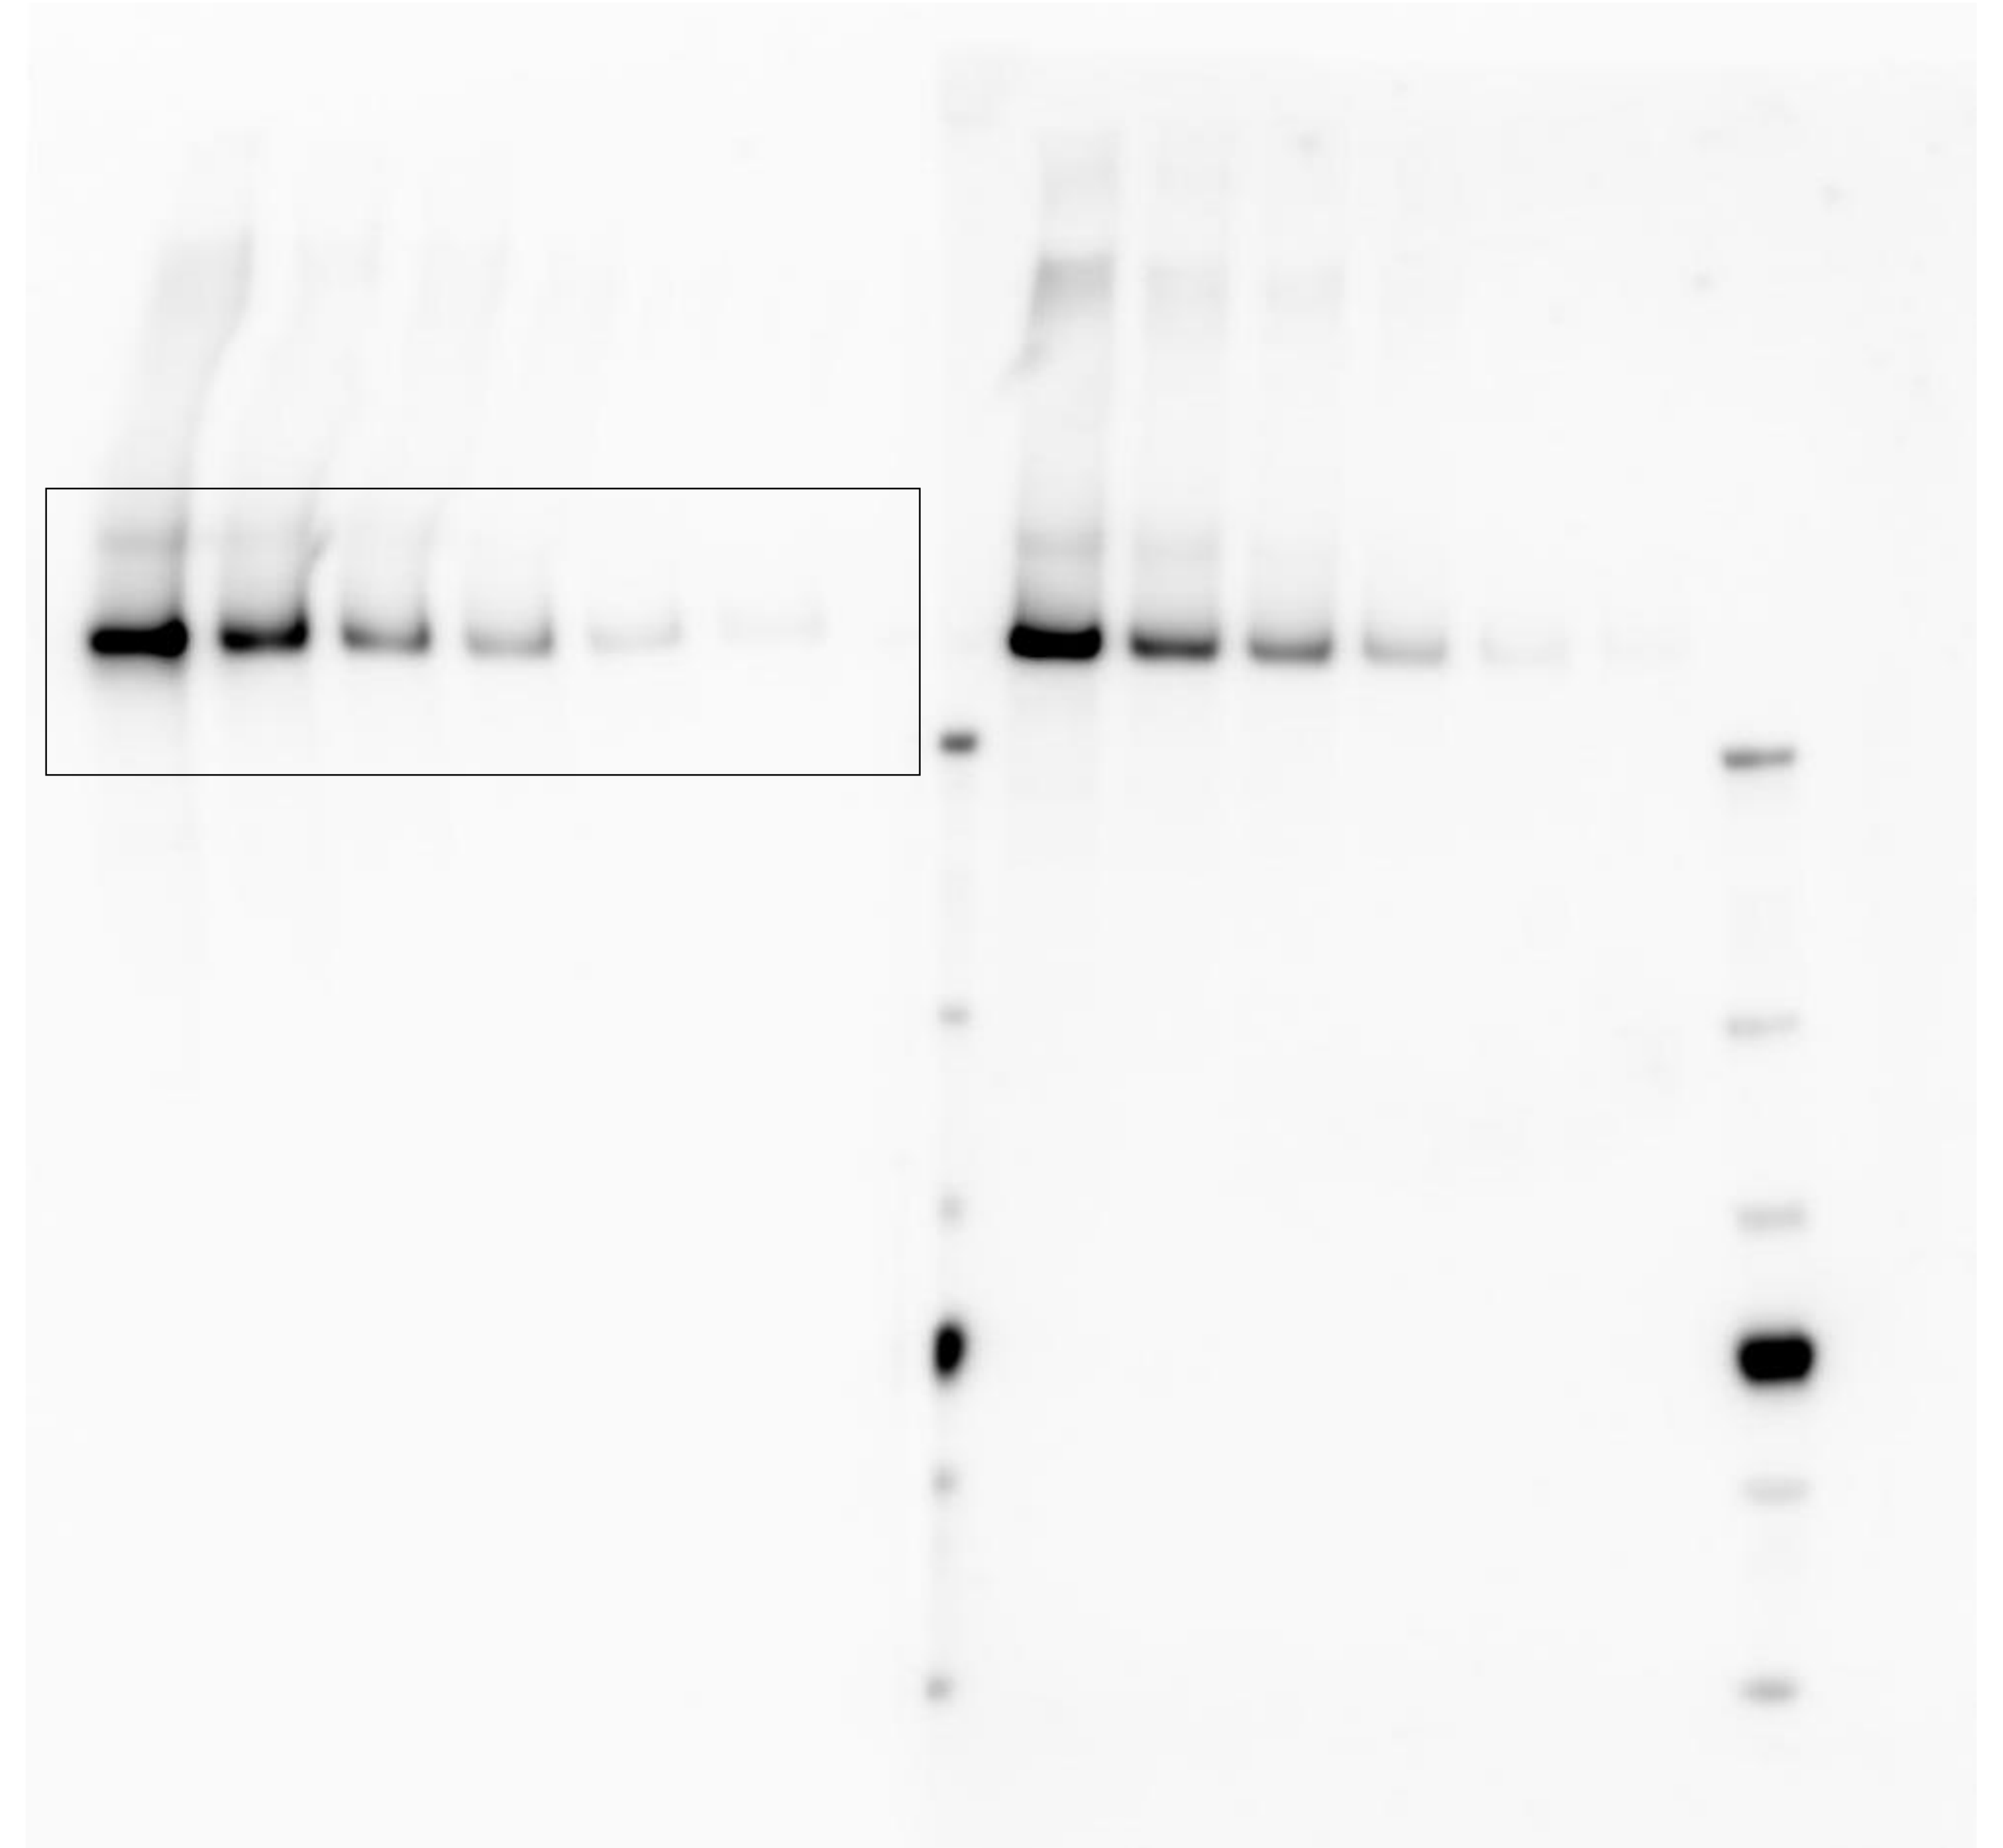

Suppl Figure 3a

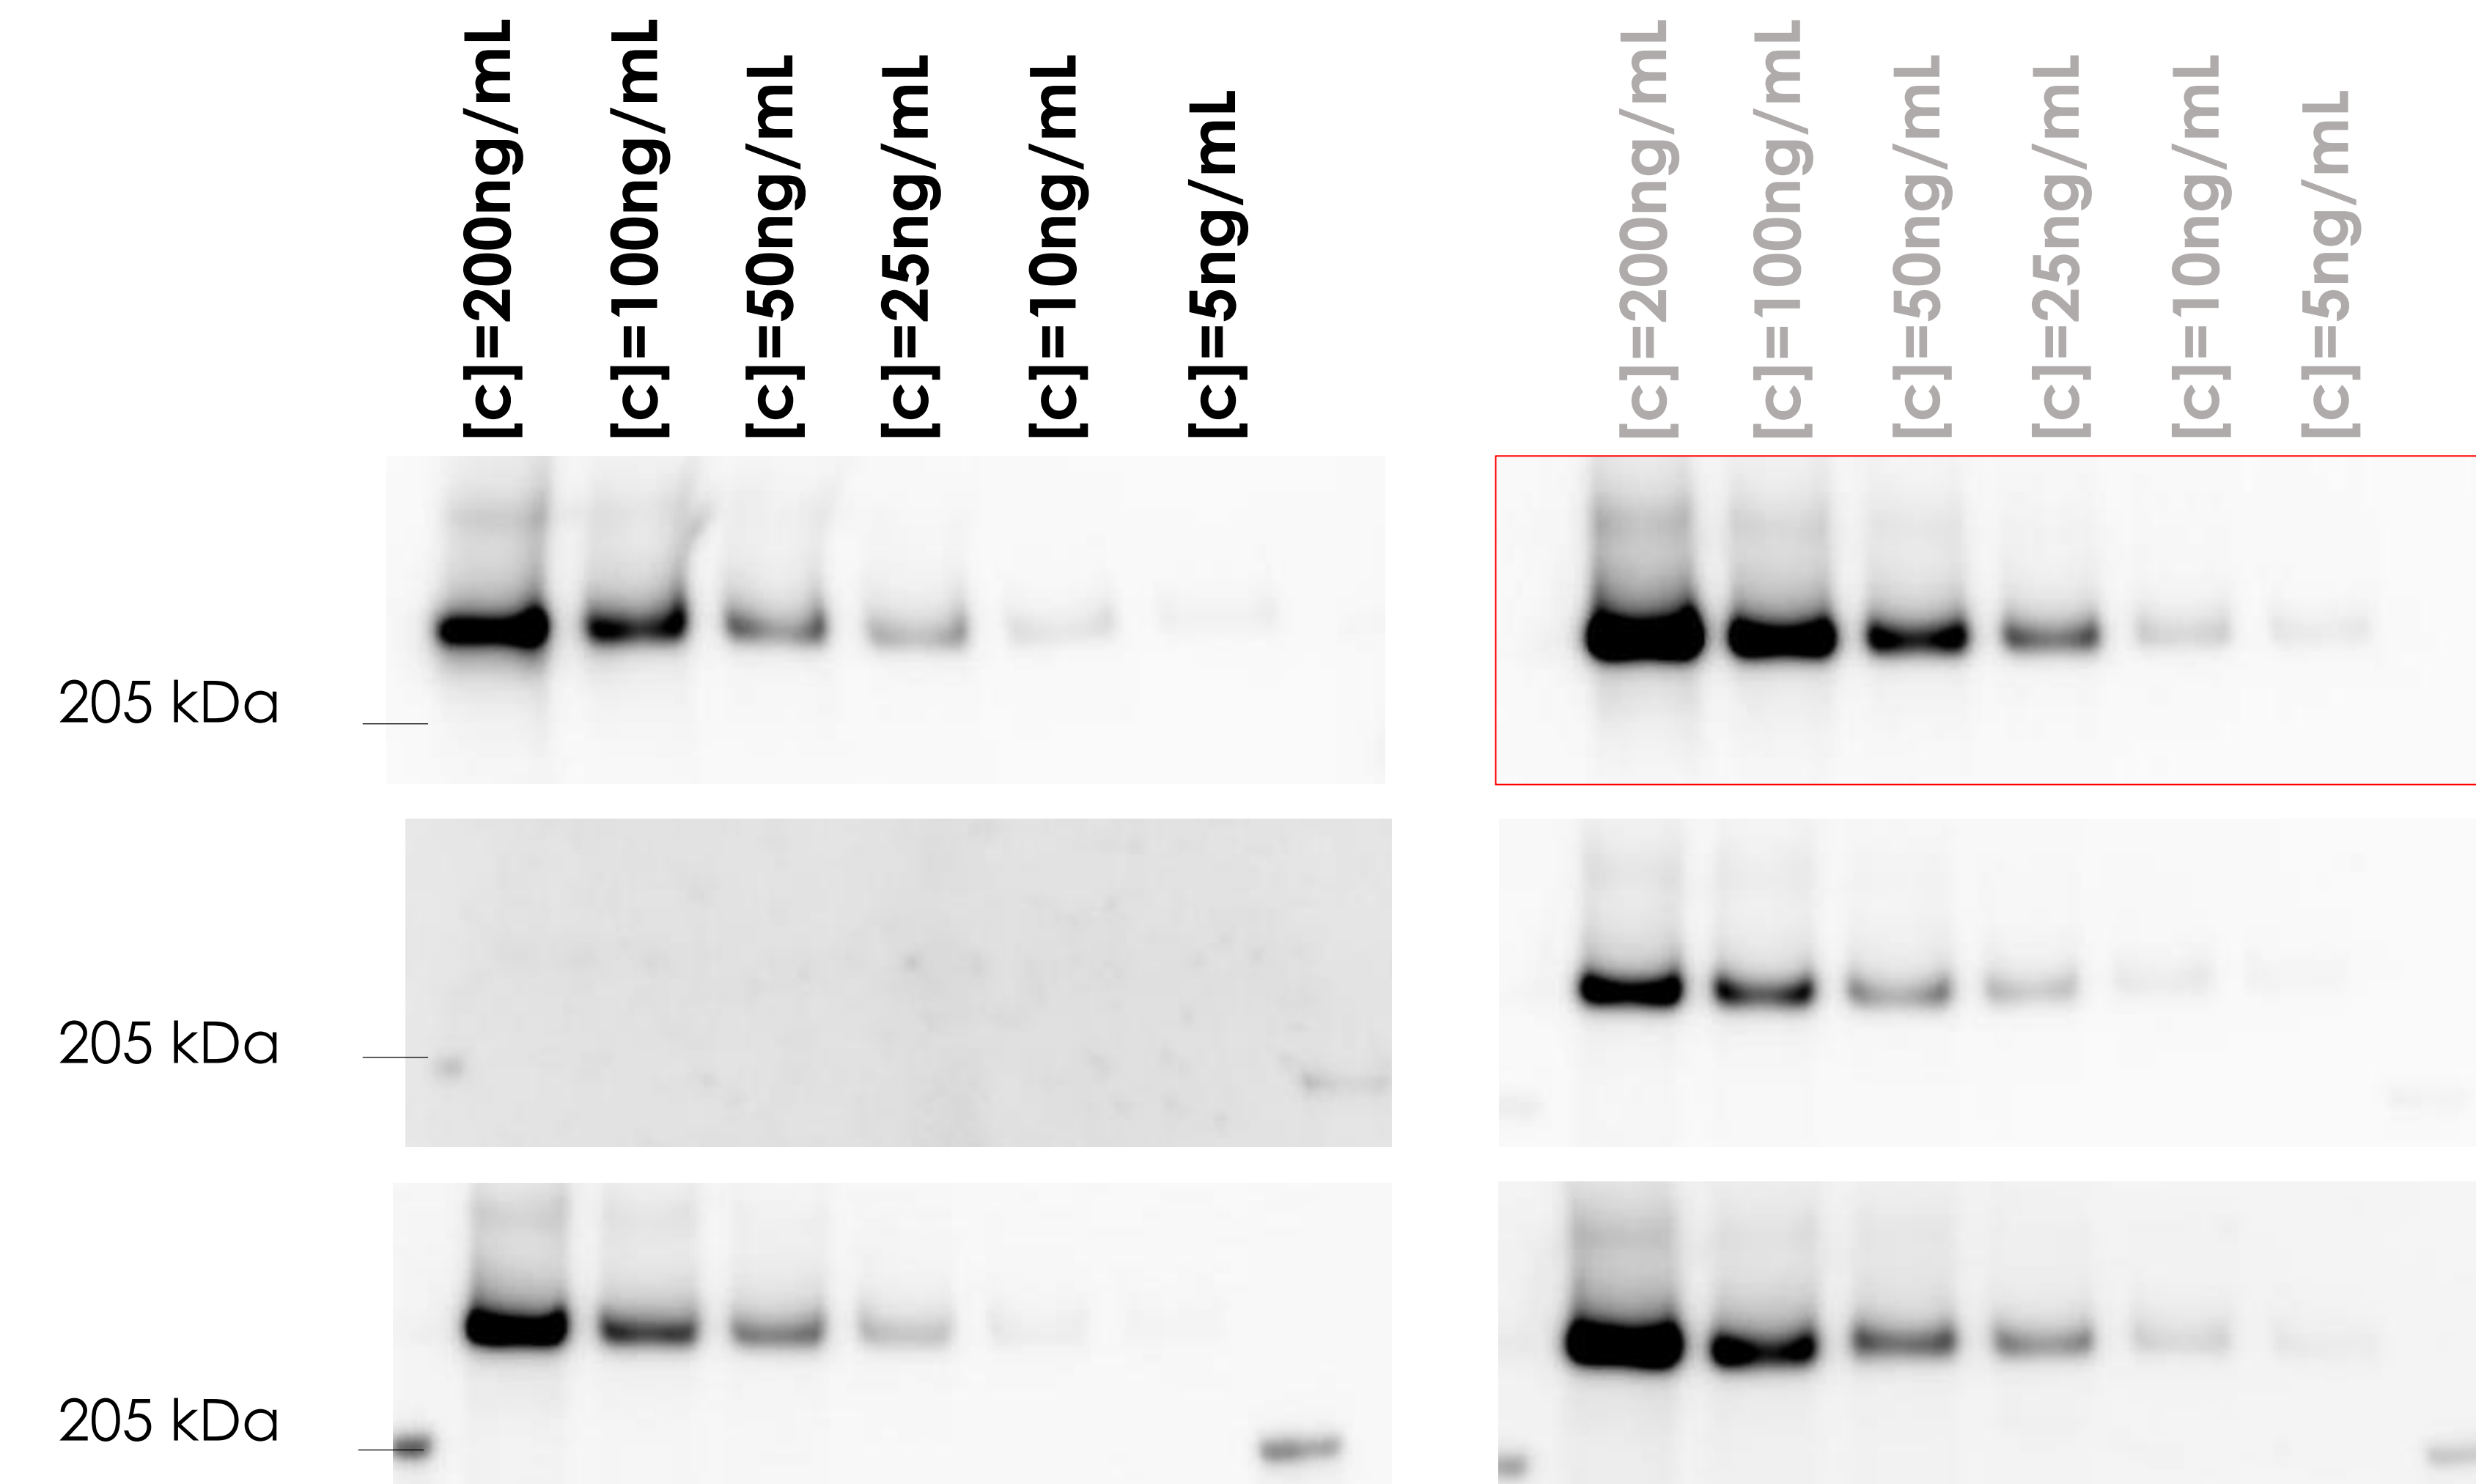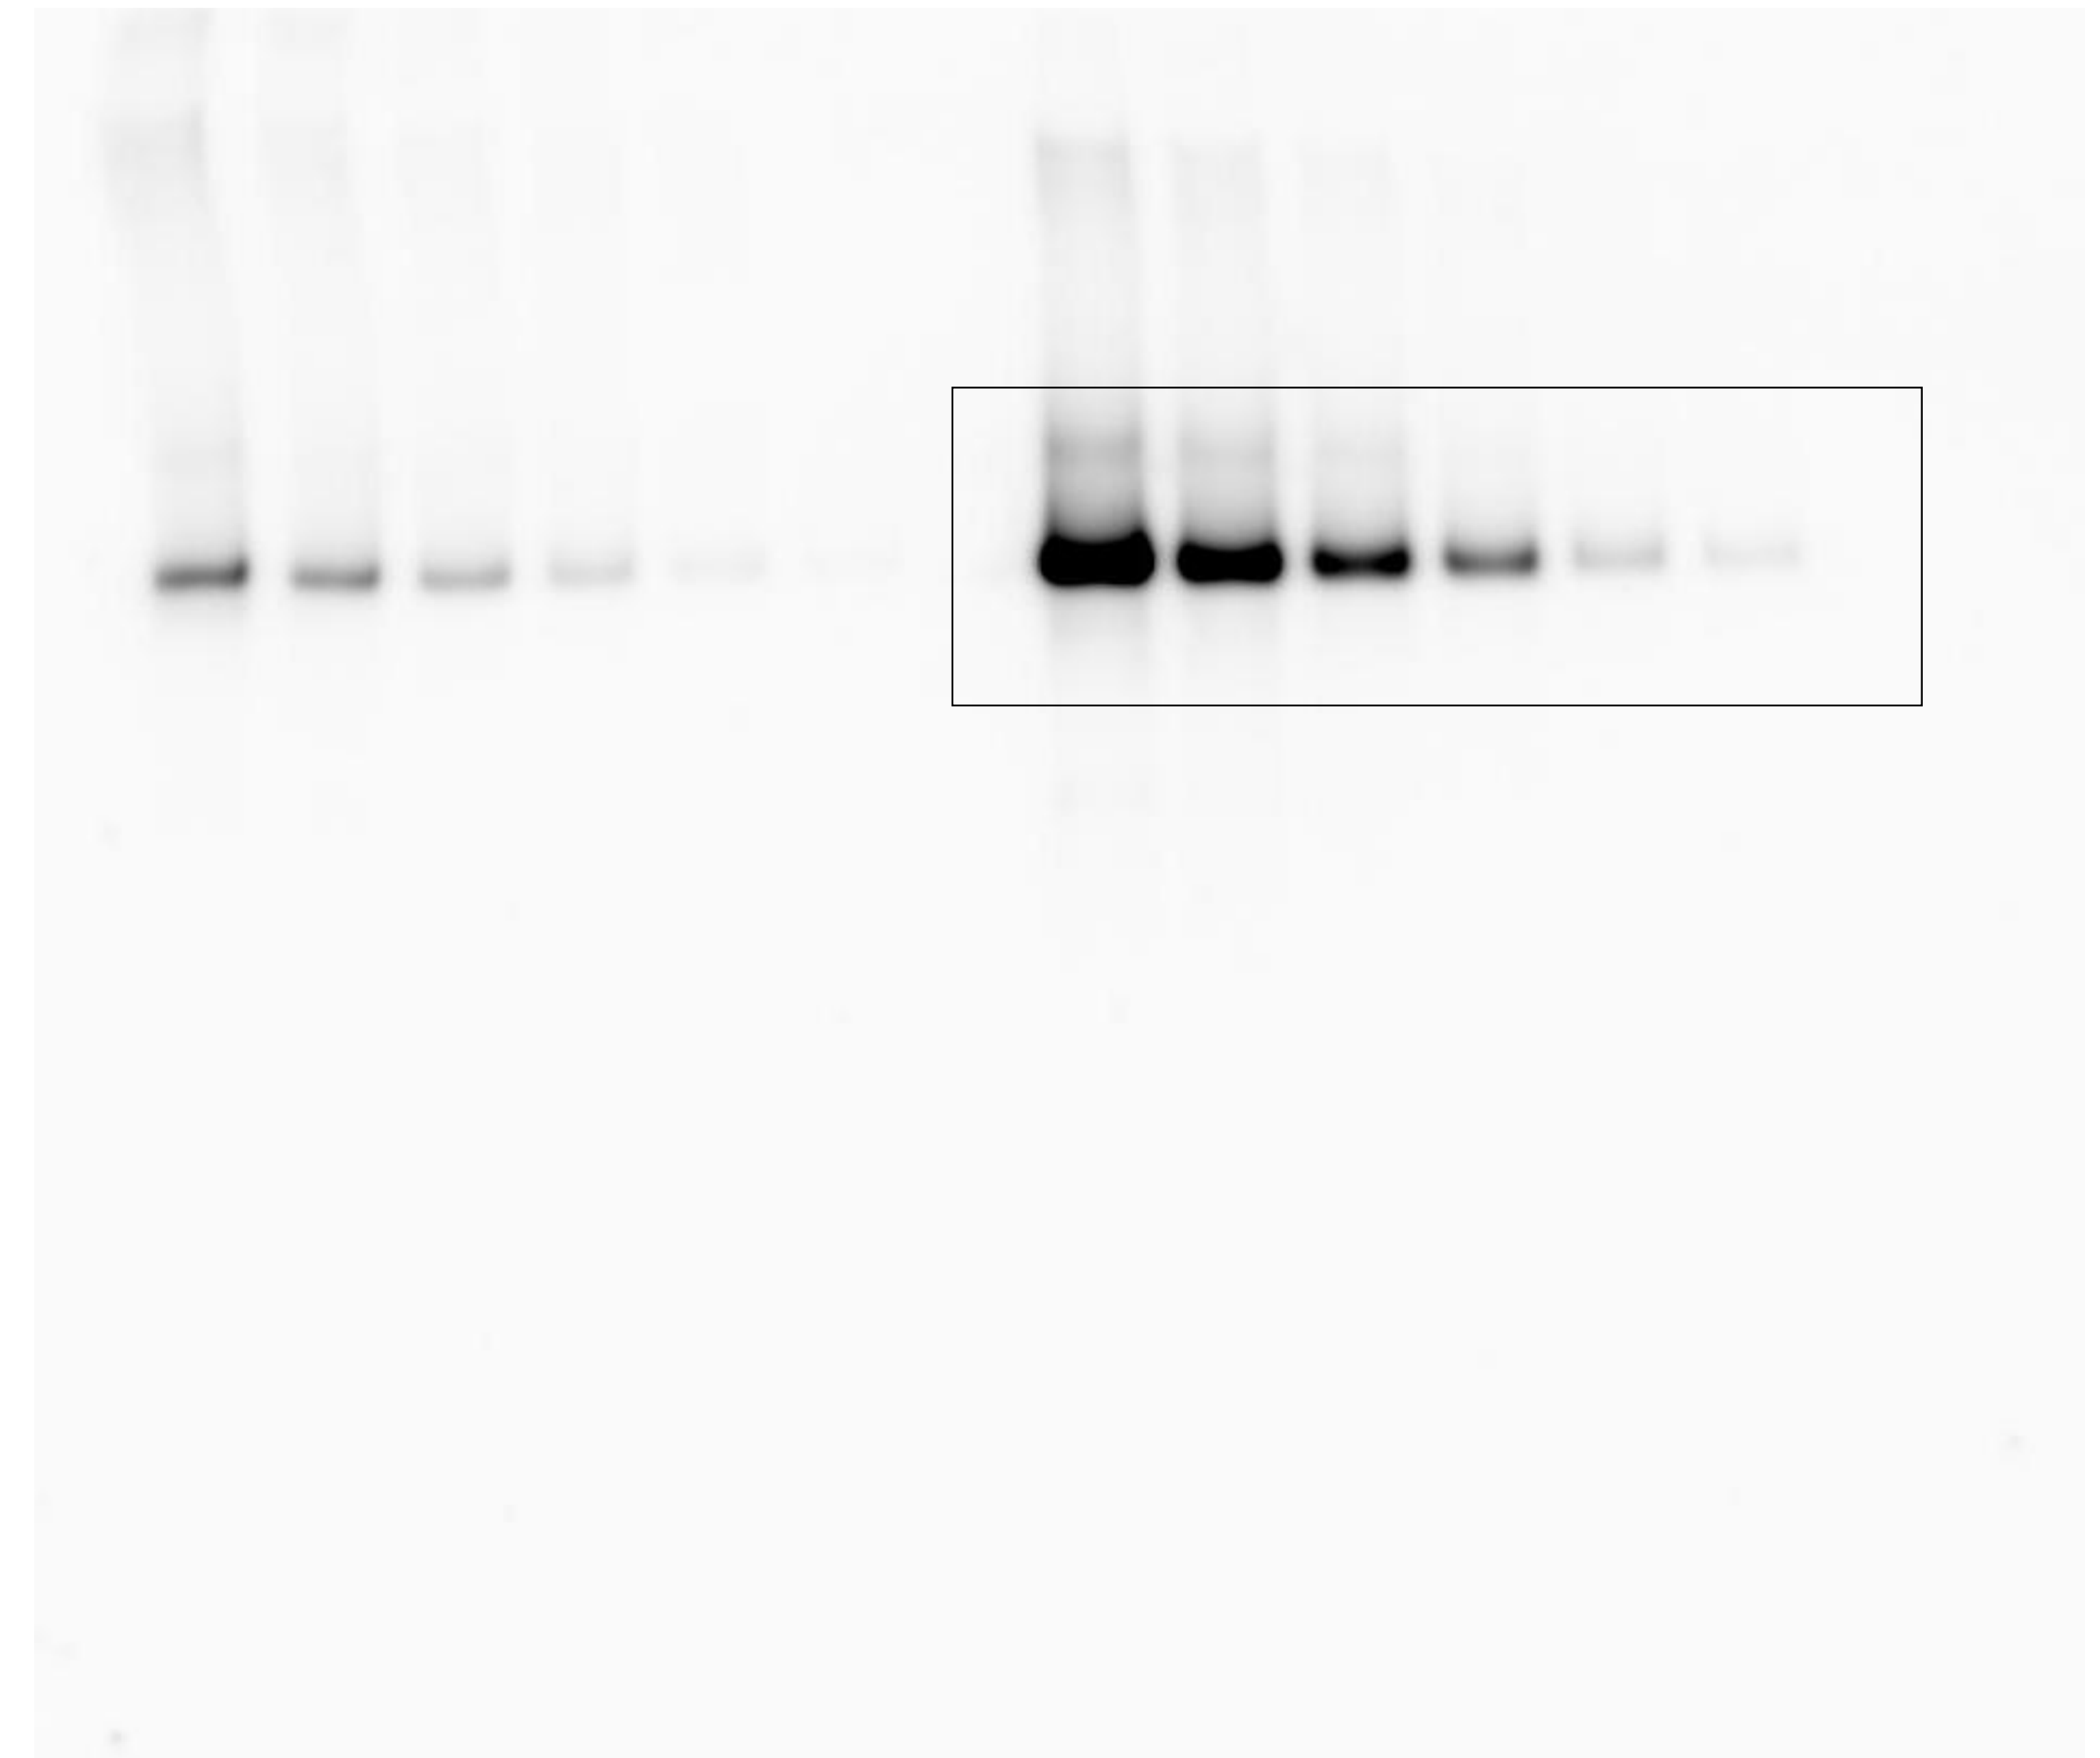

Suppl Figure 3a

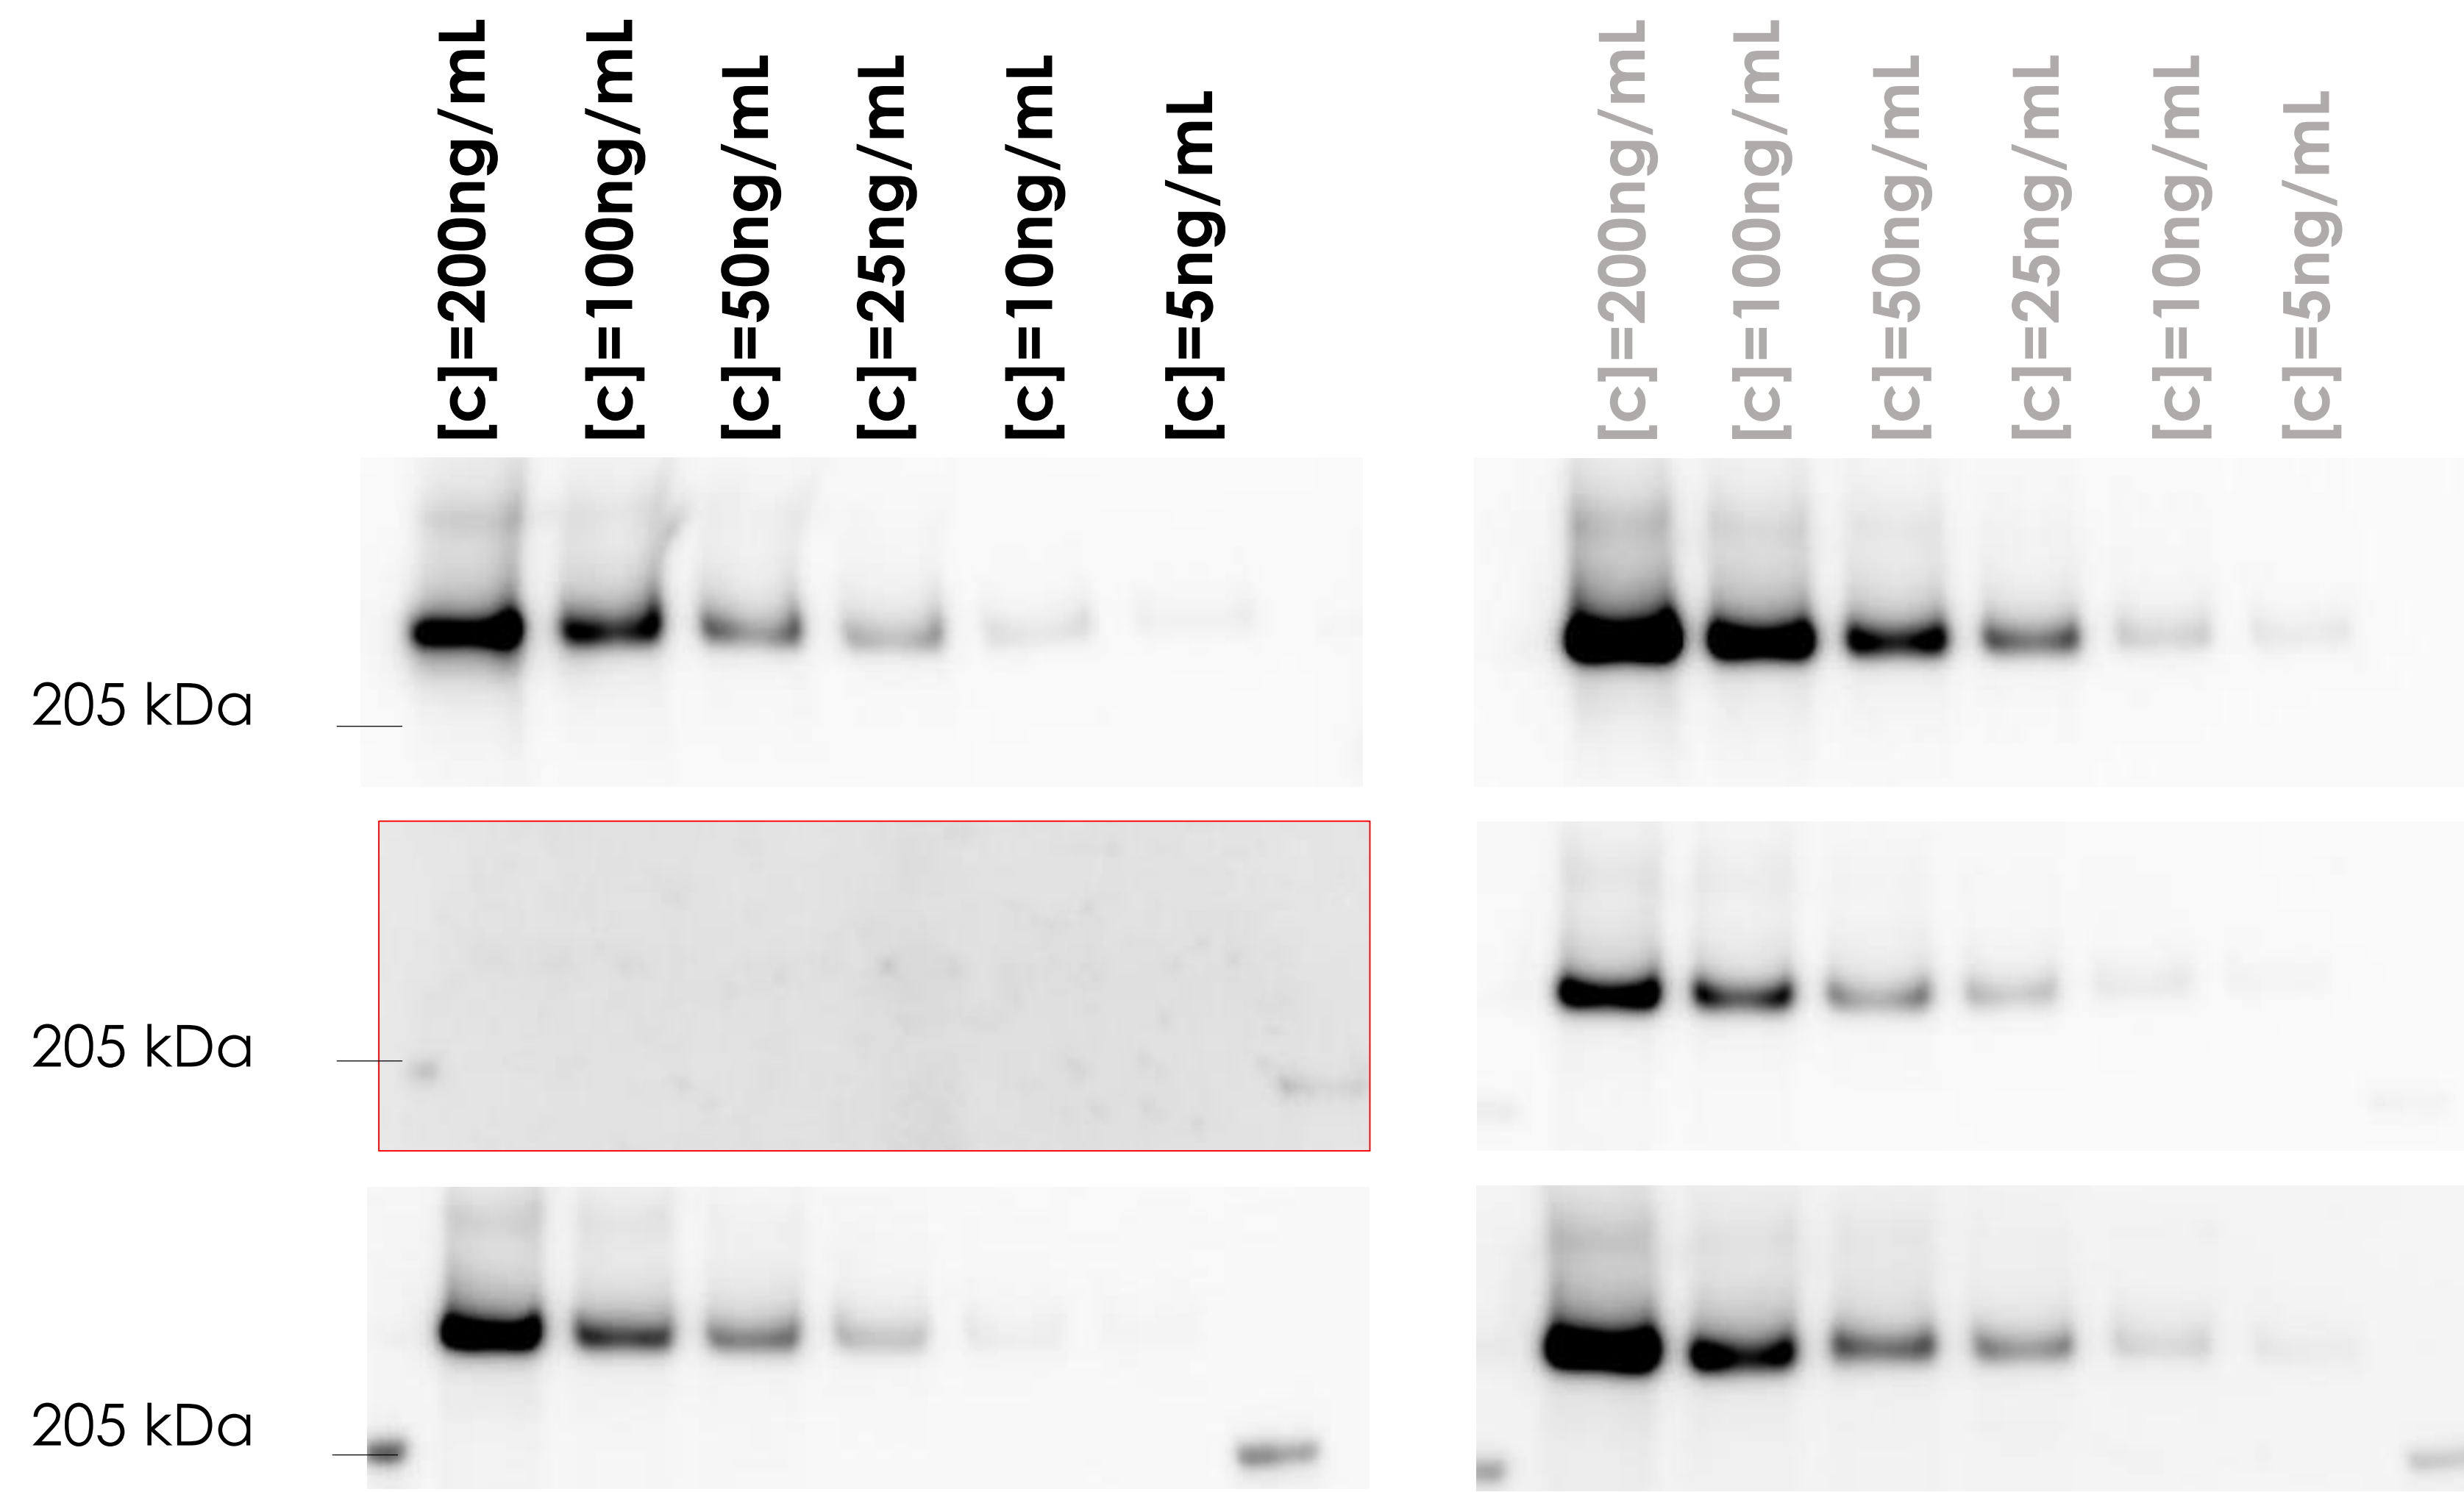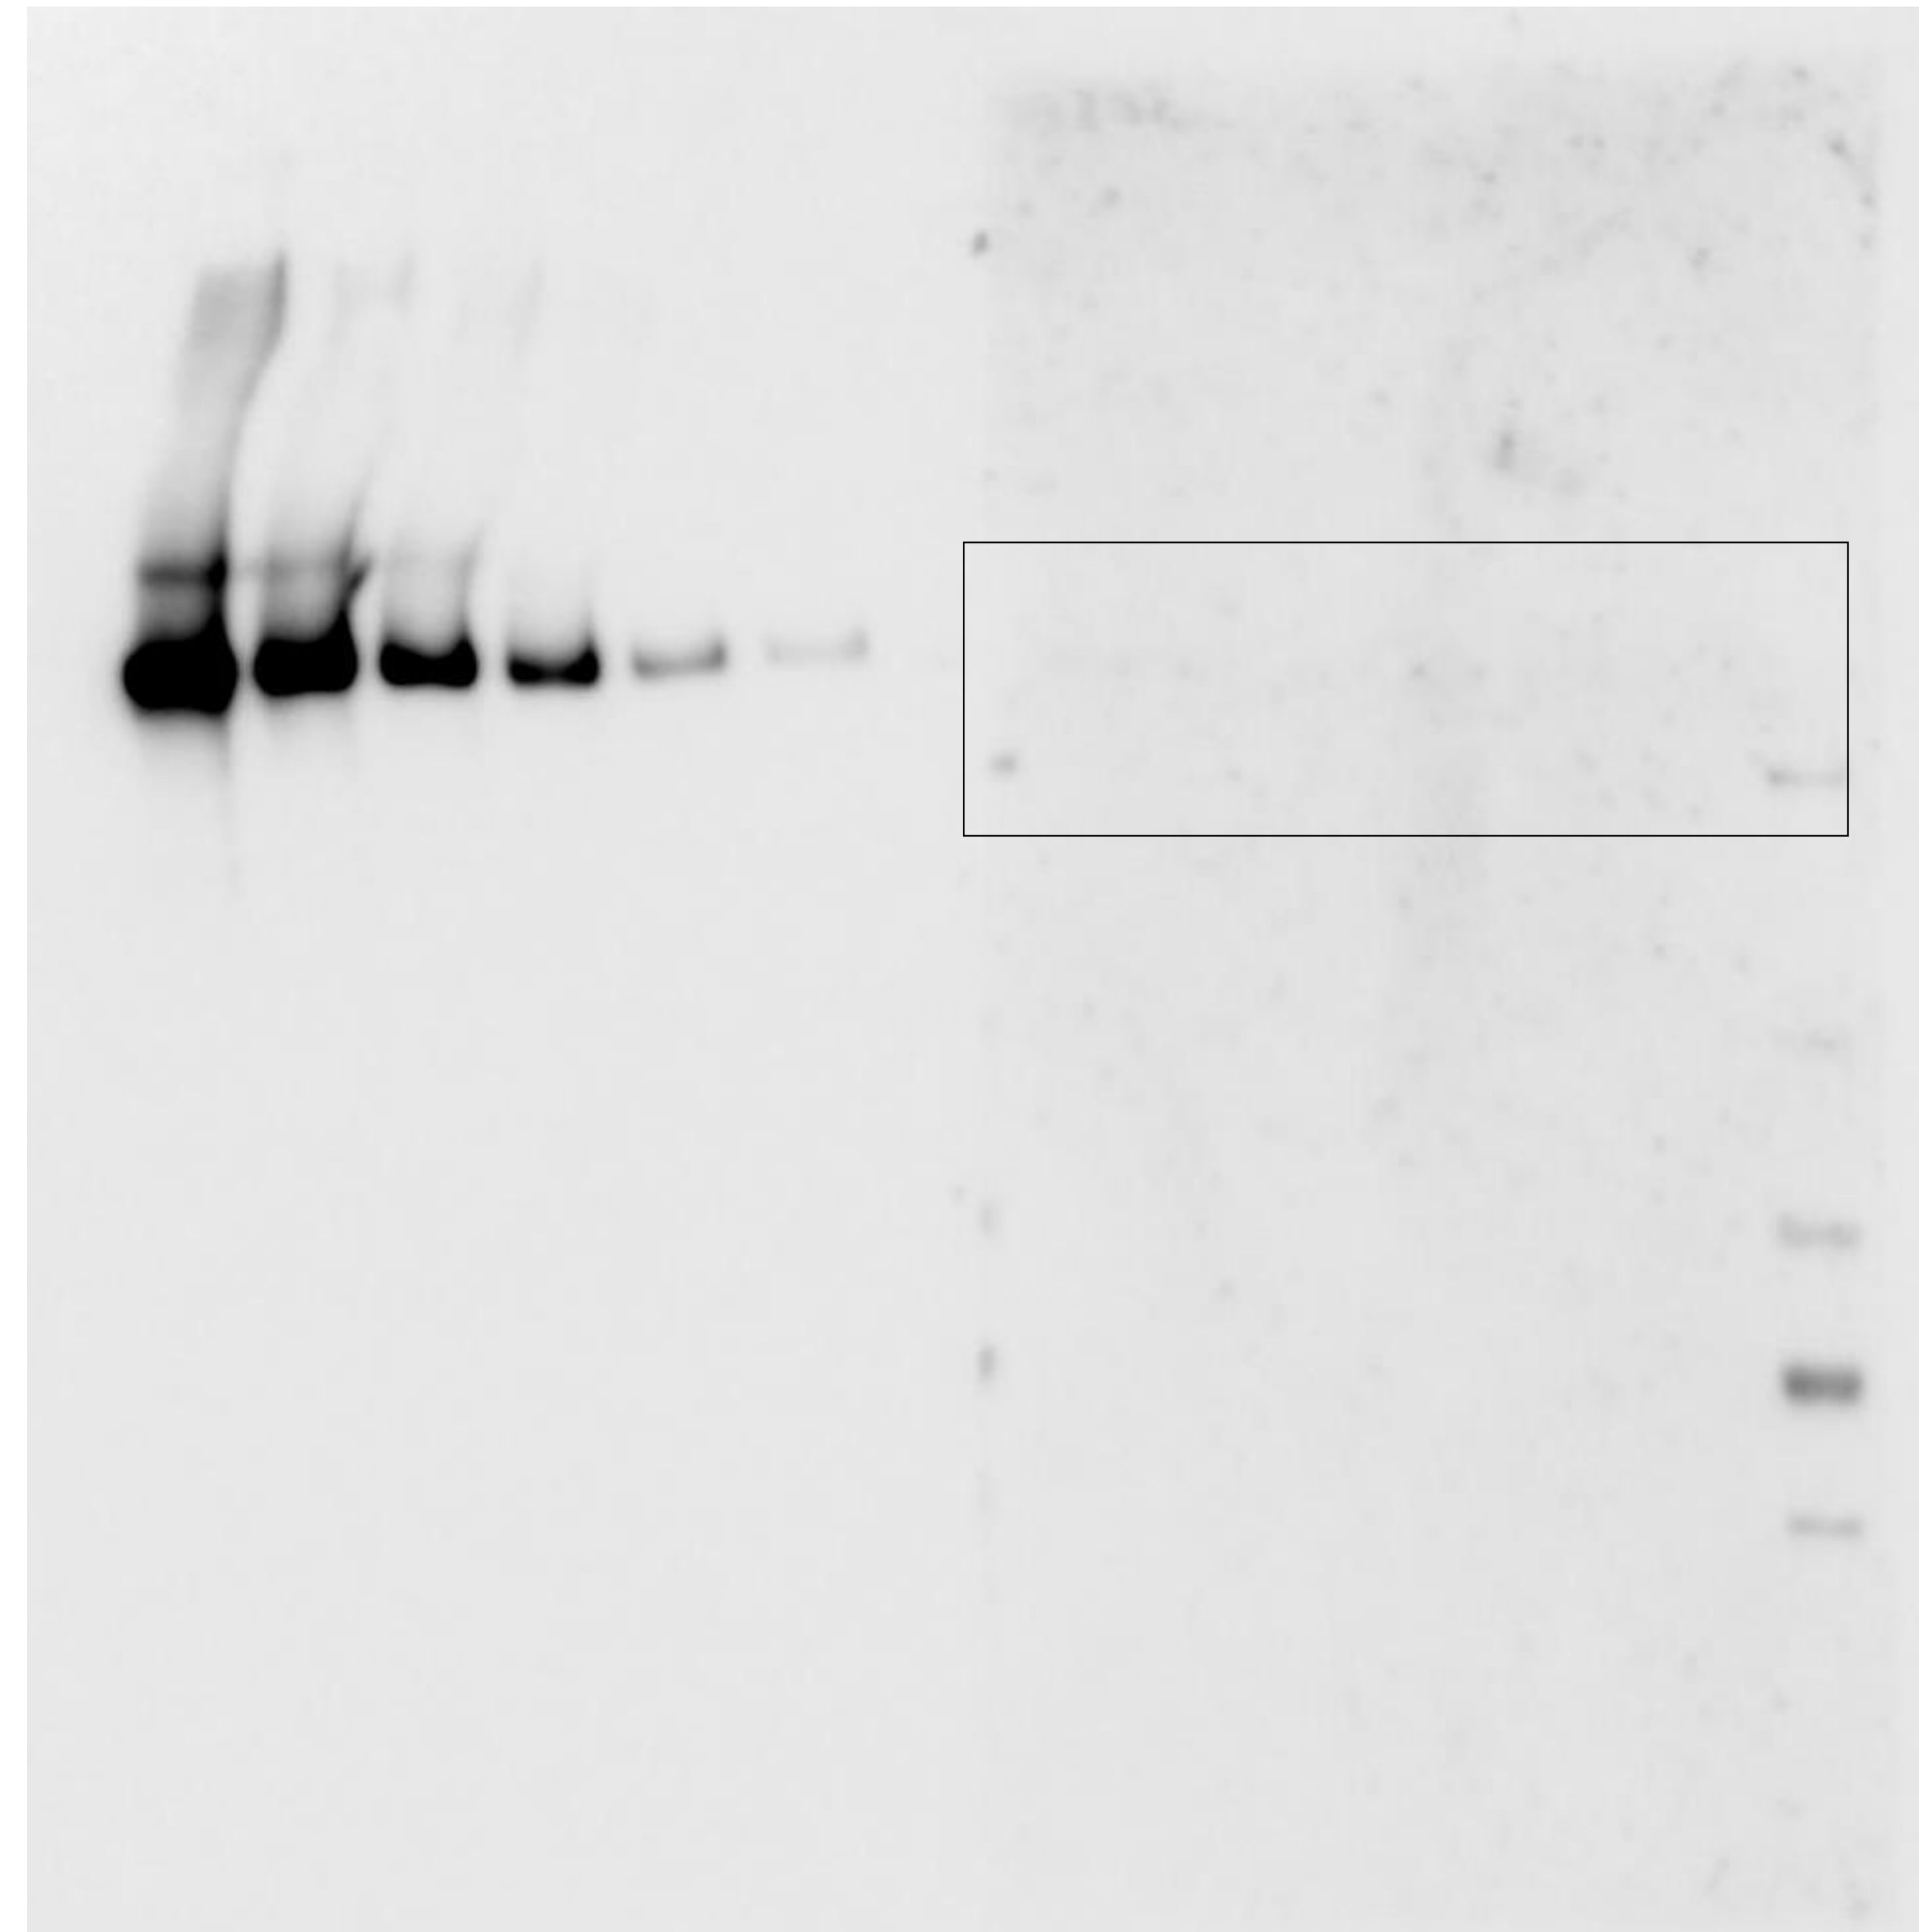

Suppl Figure 3a

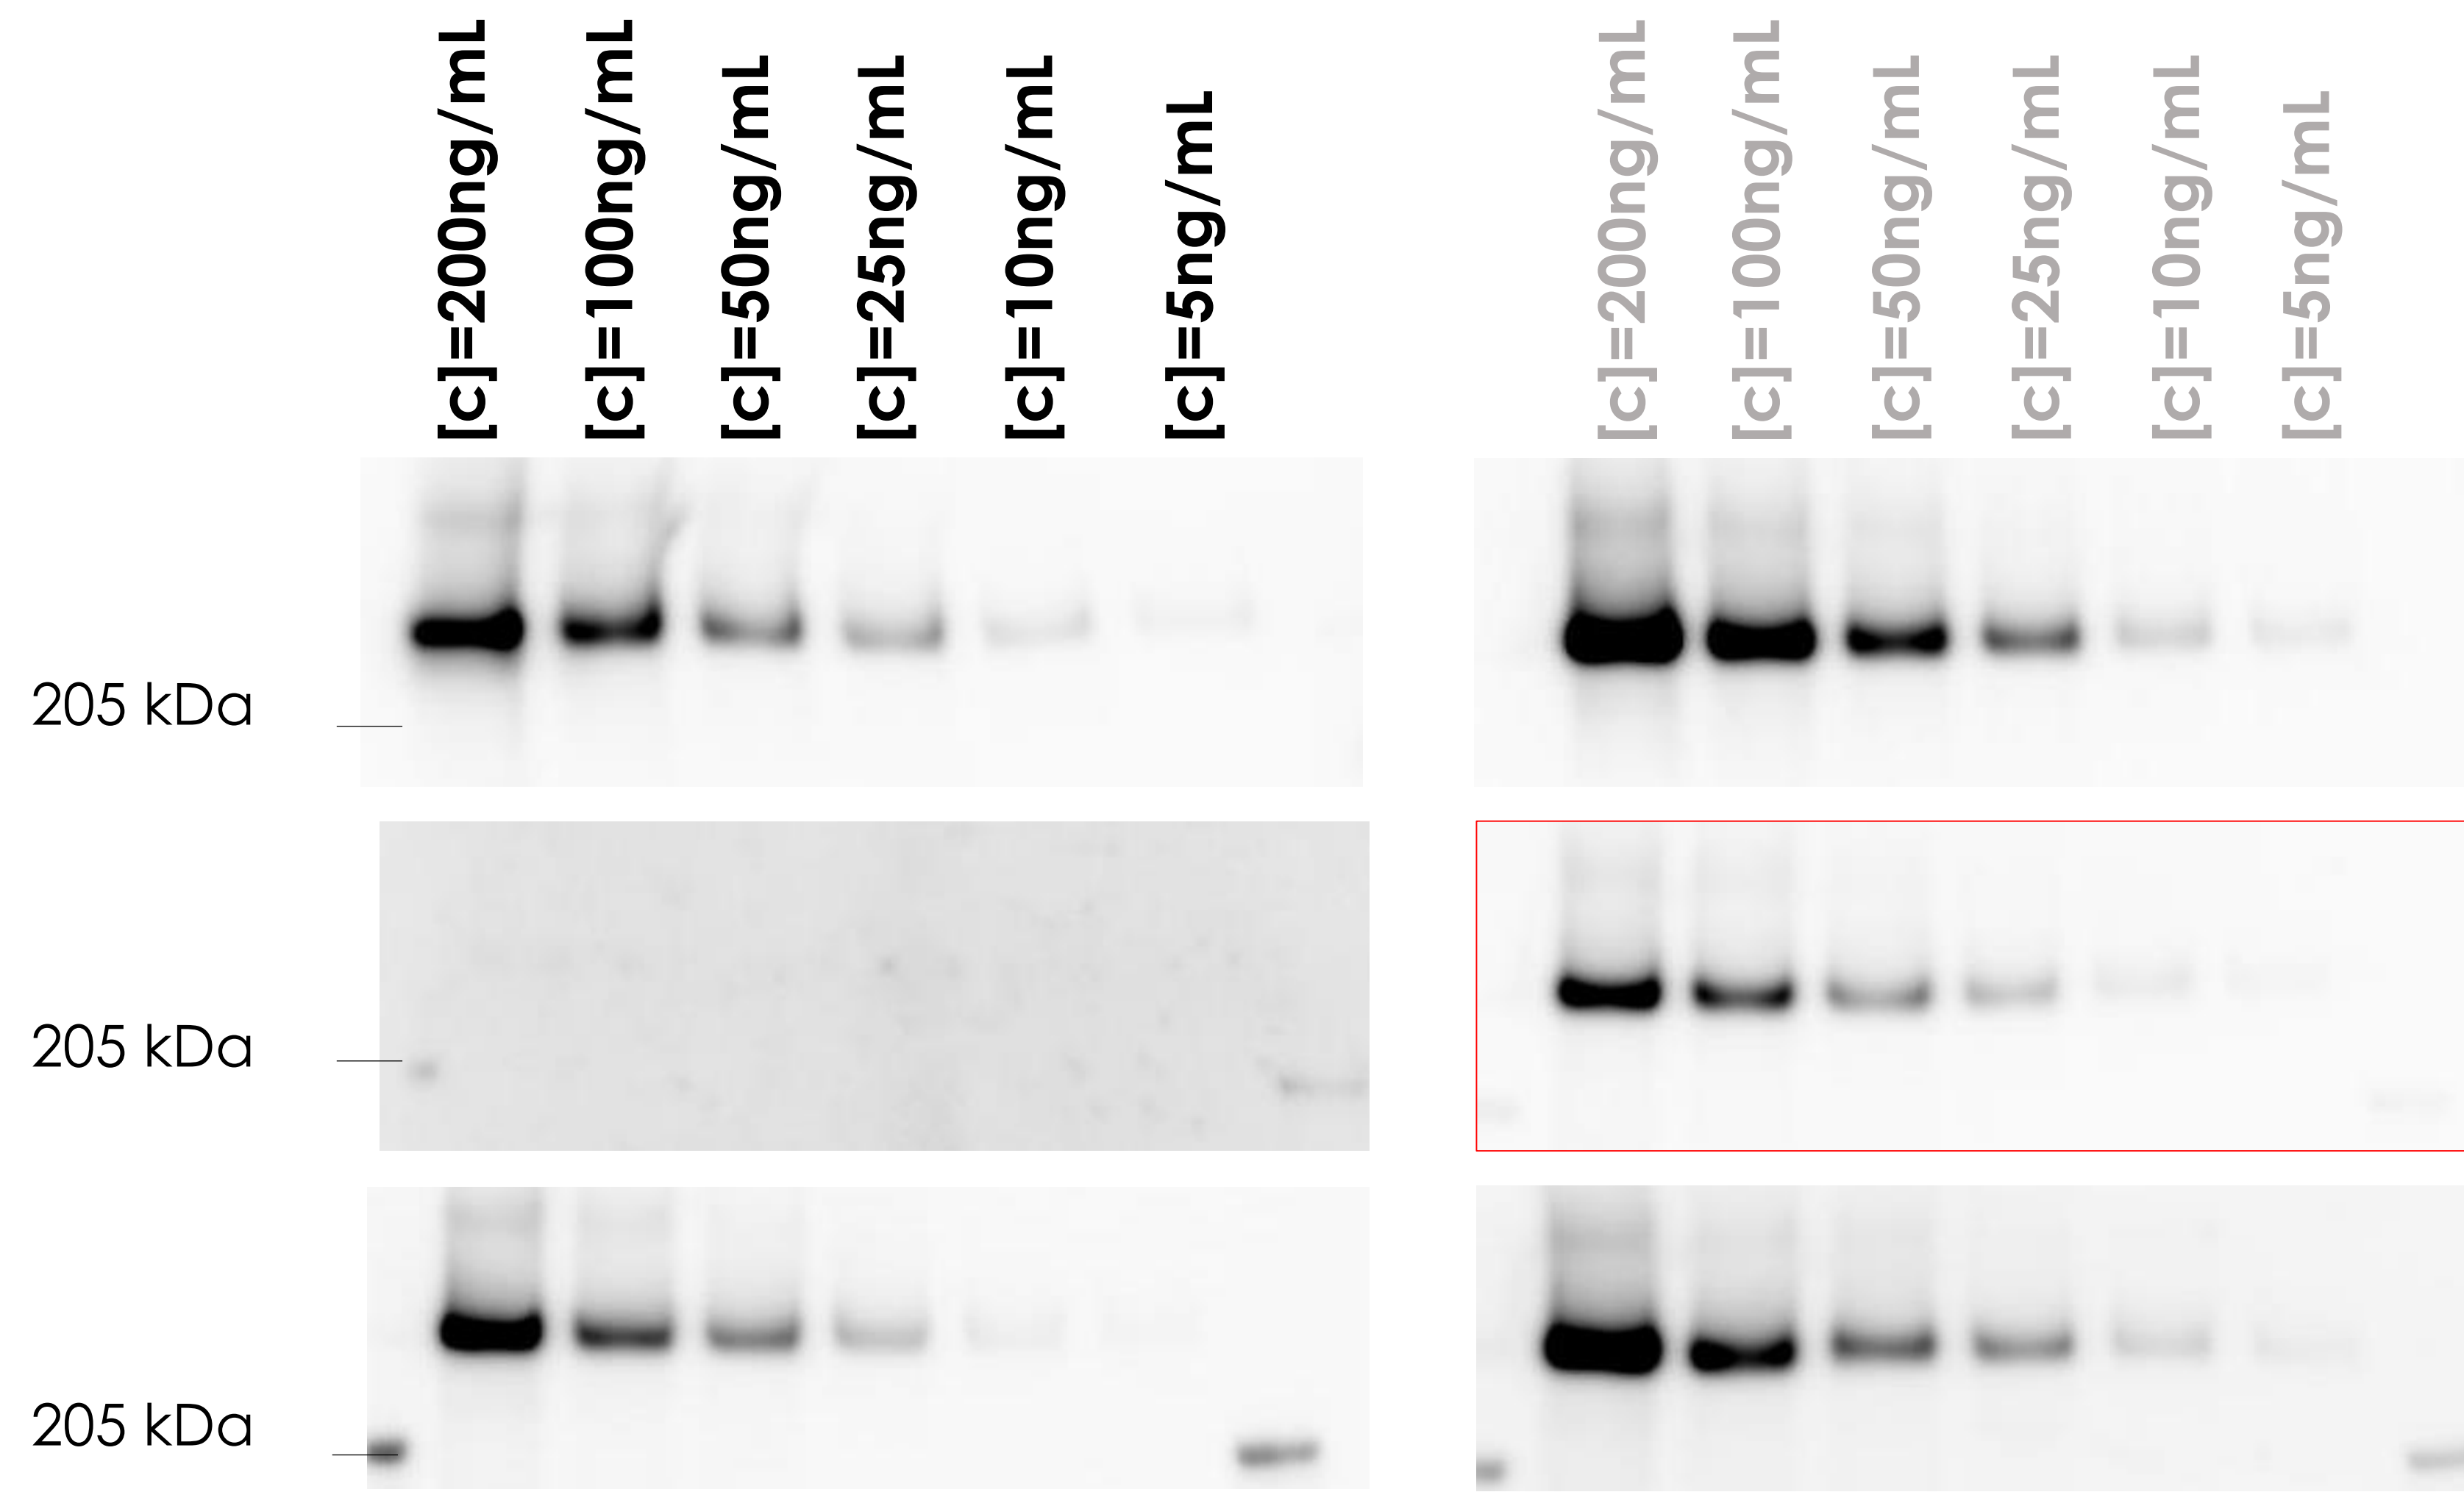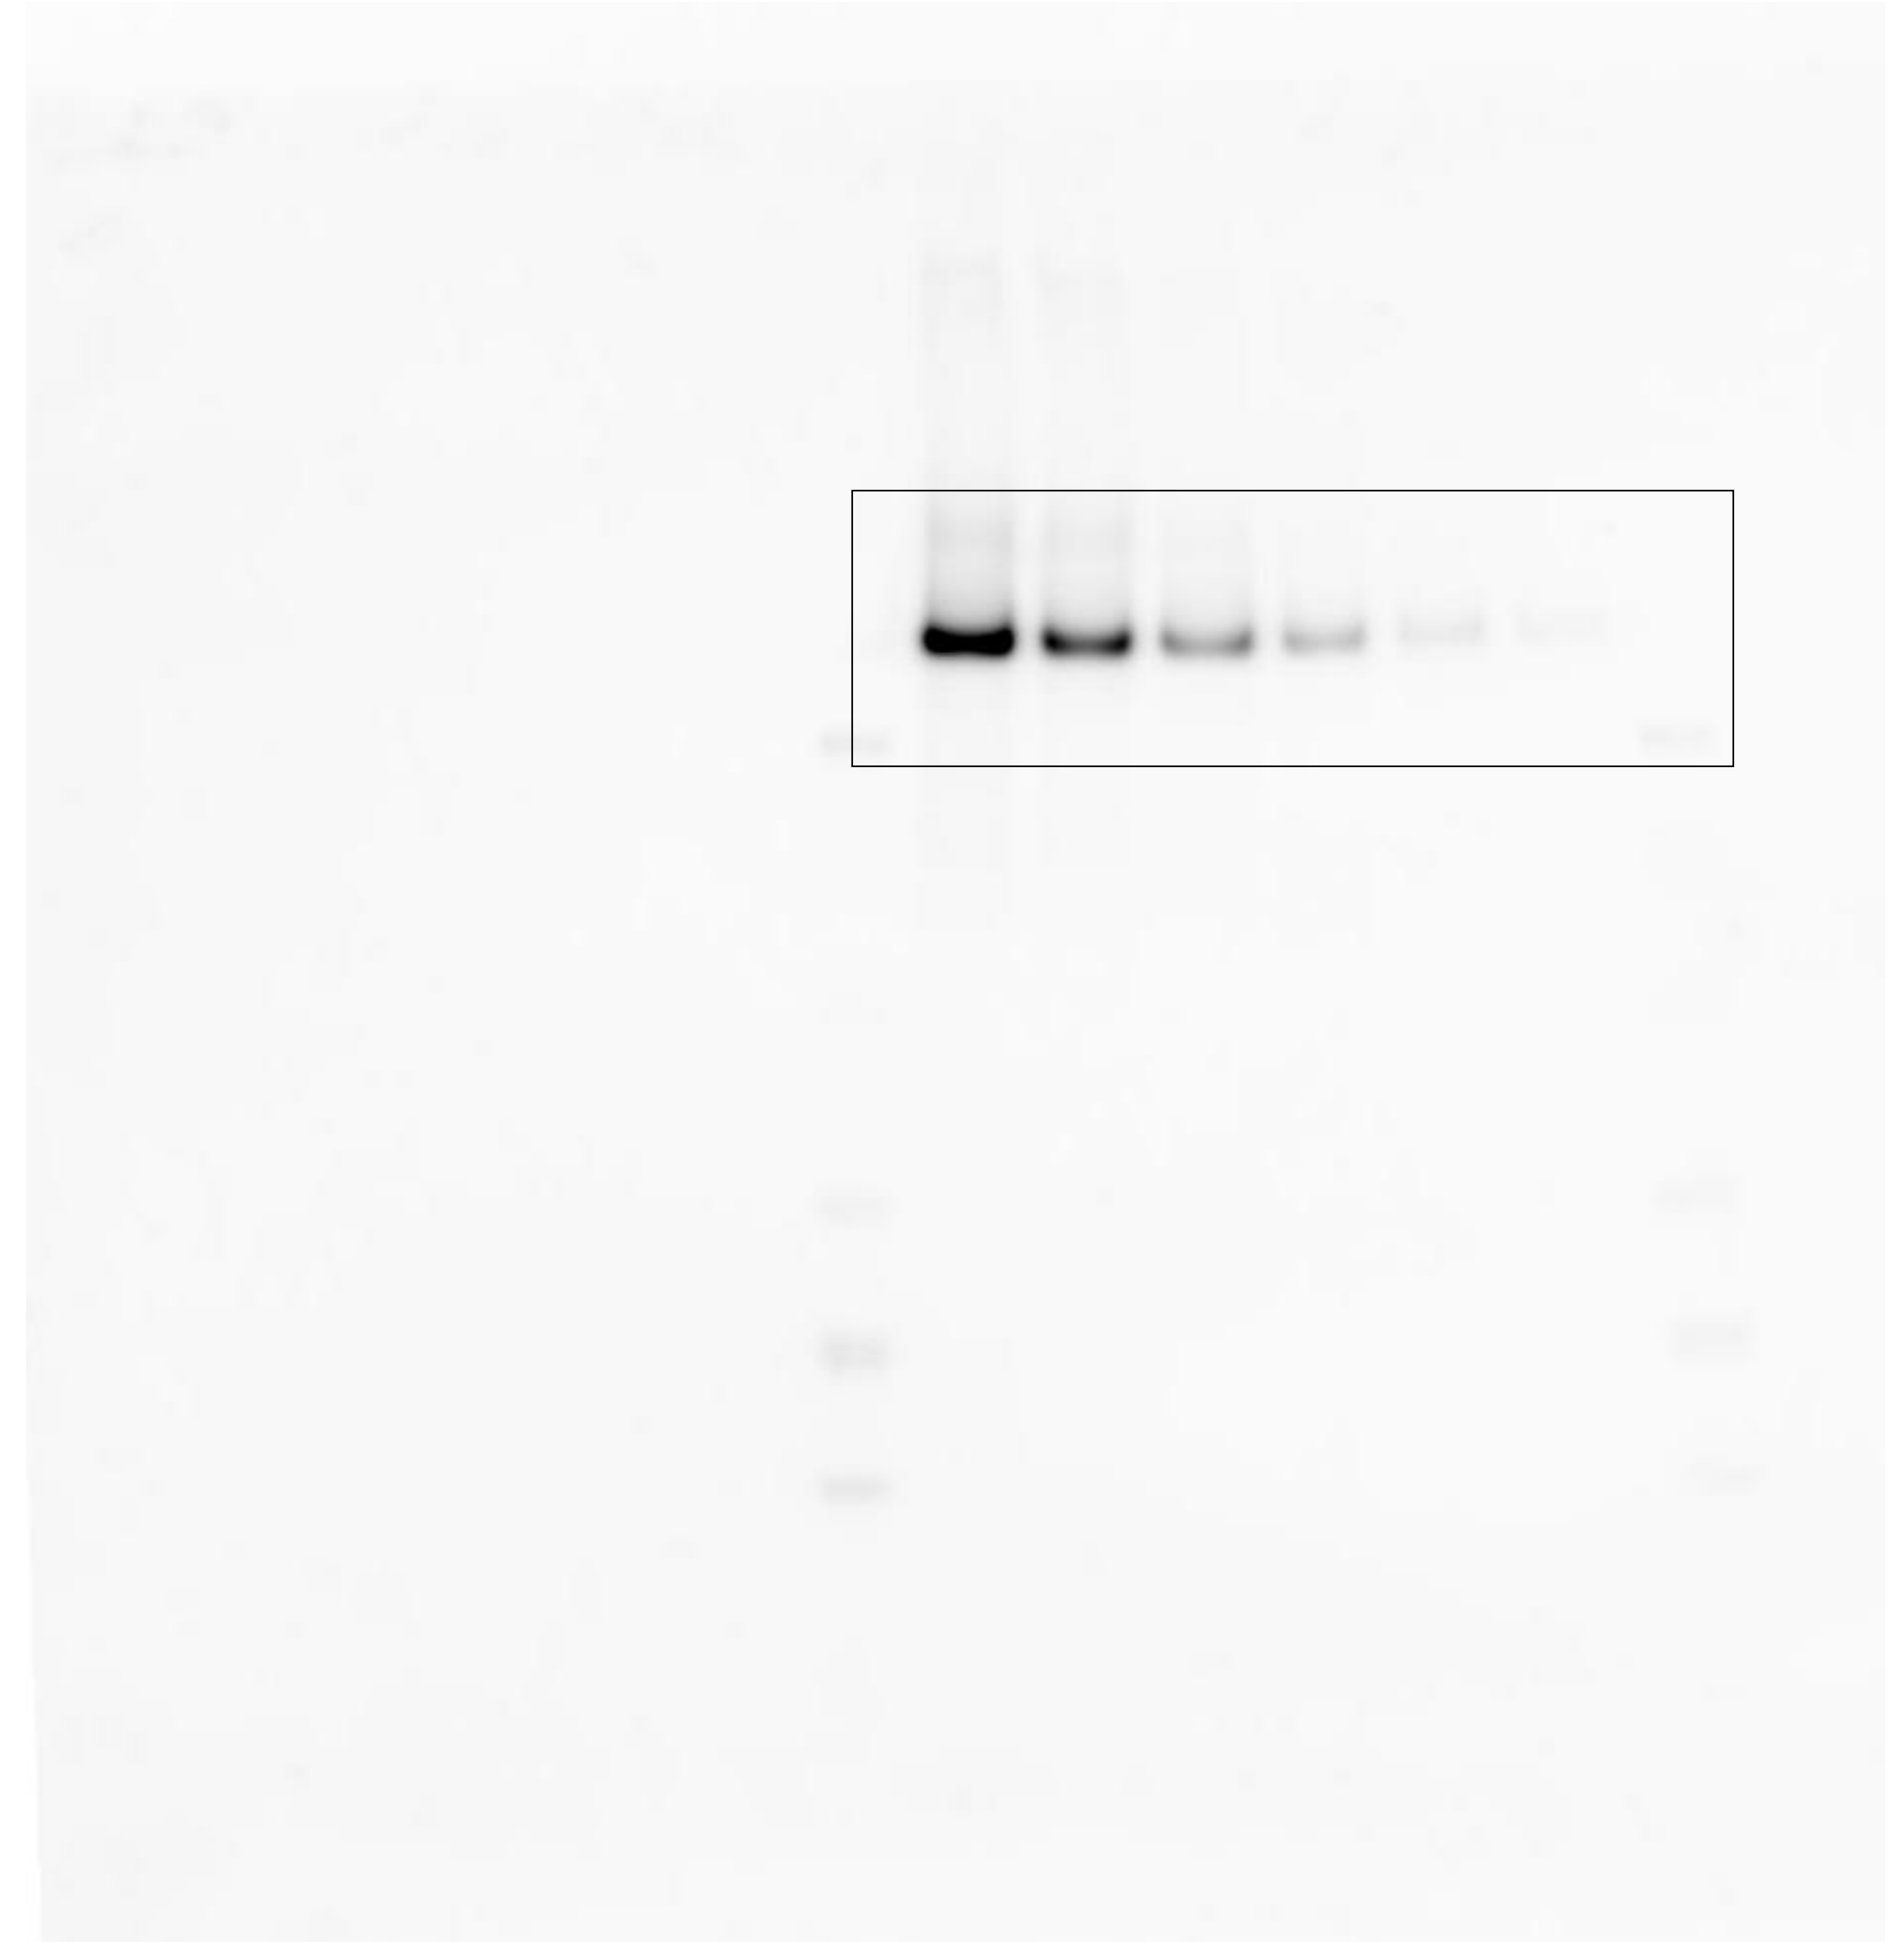

Suppl Figure 3a

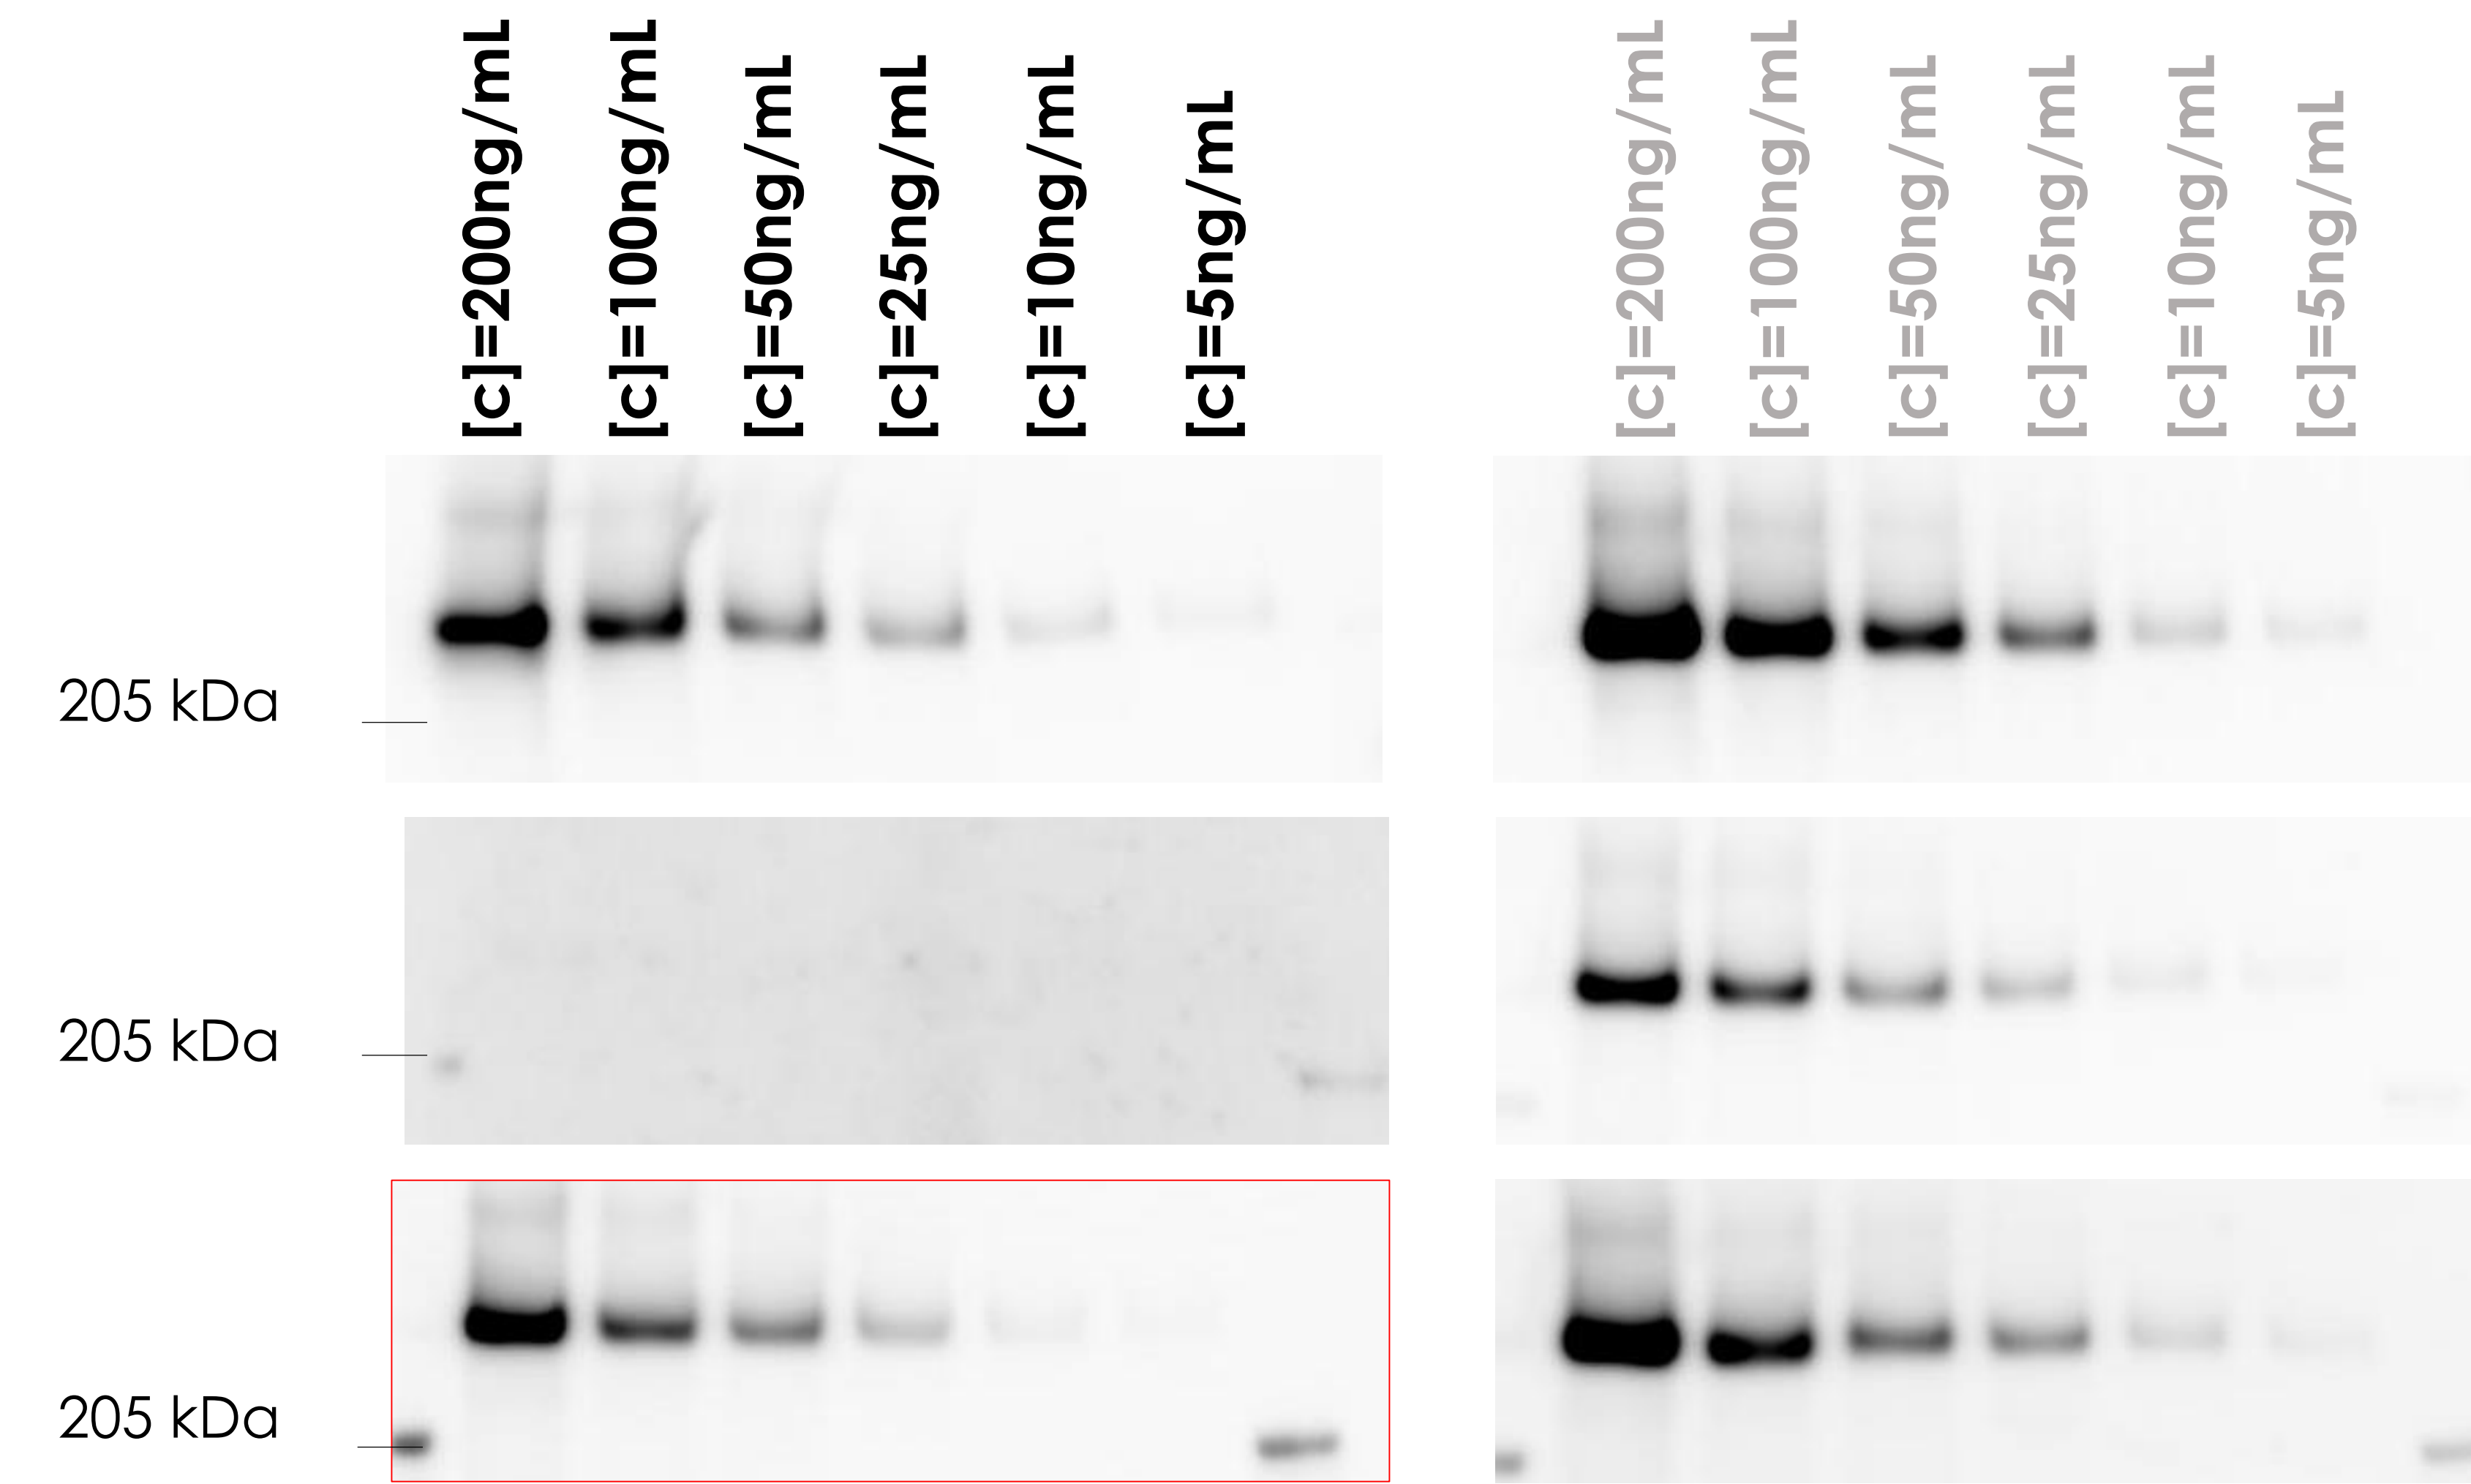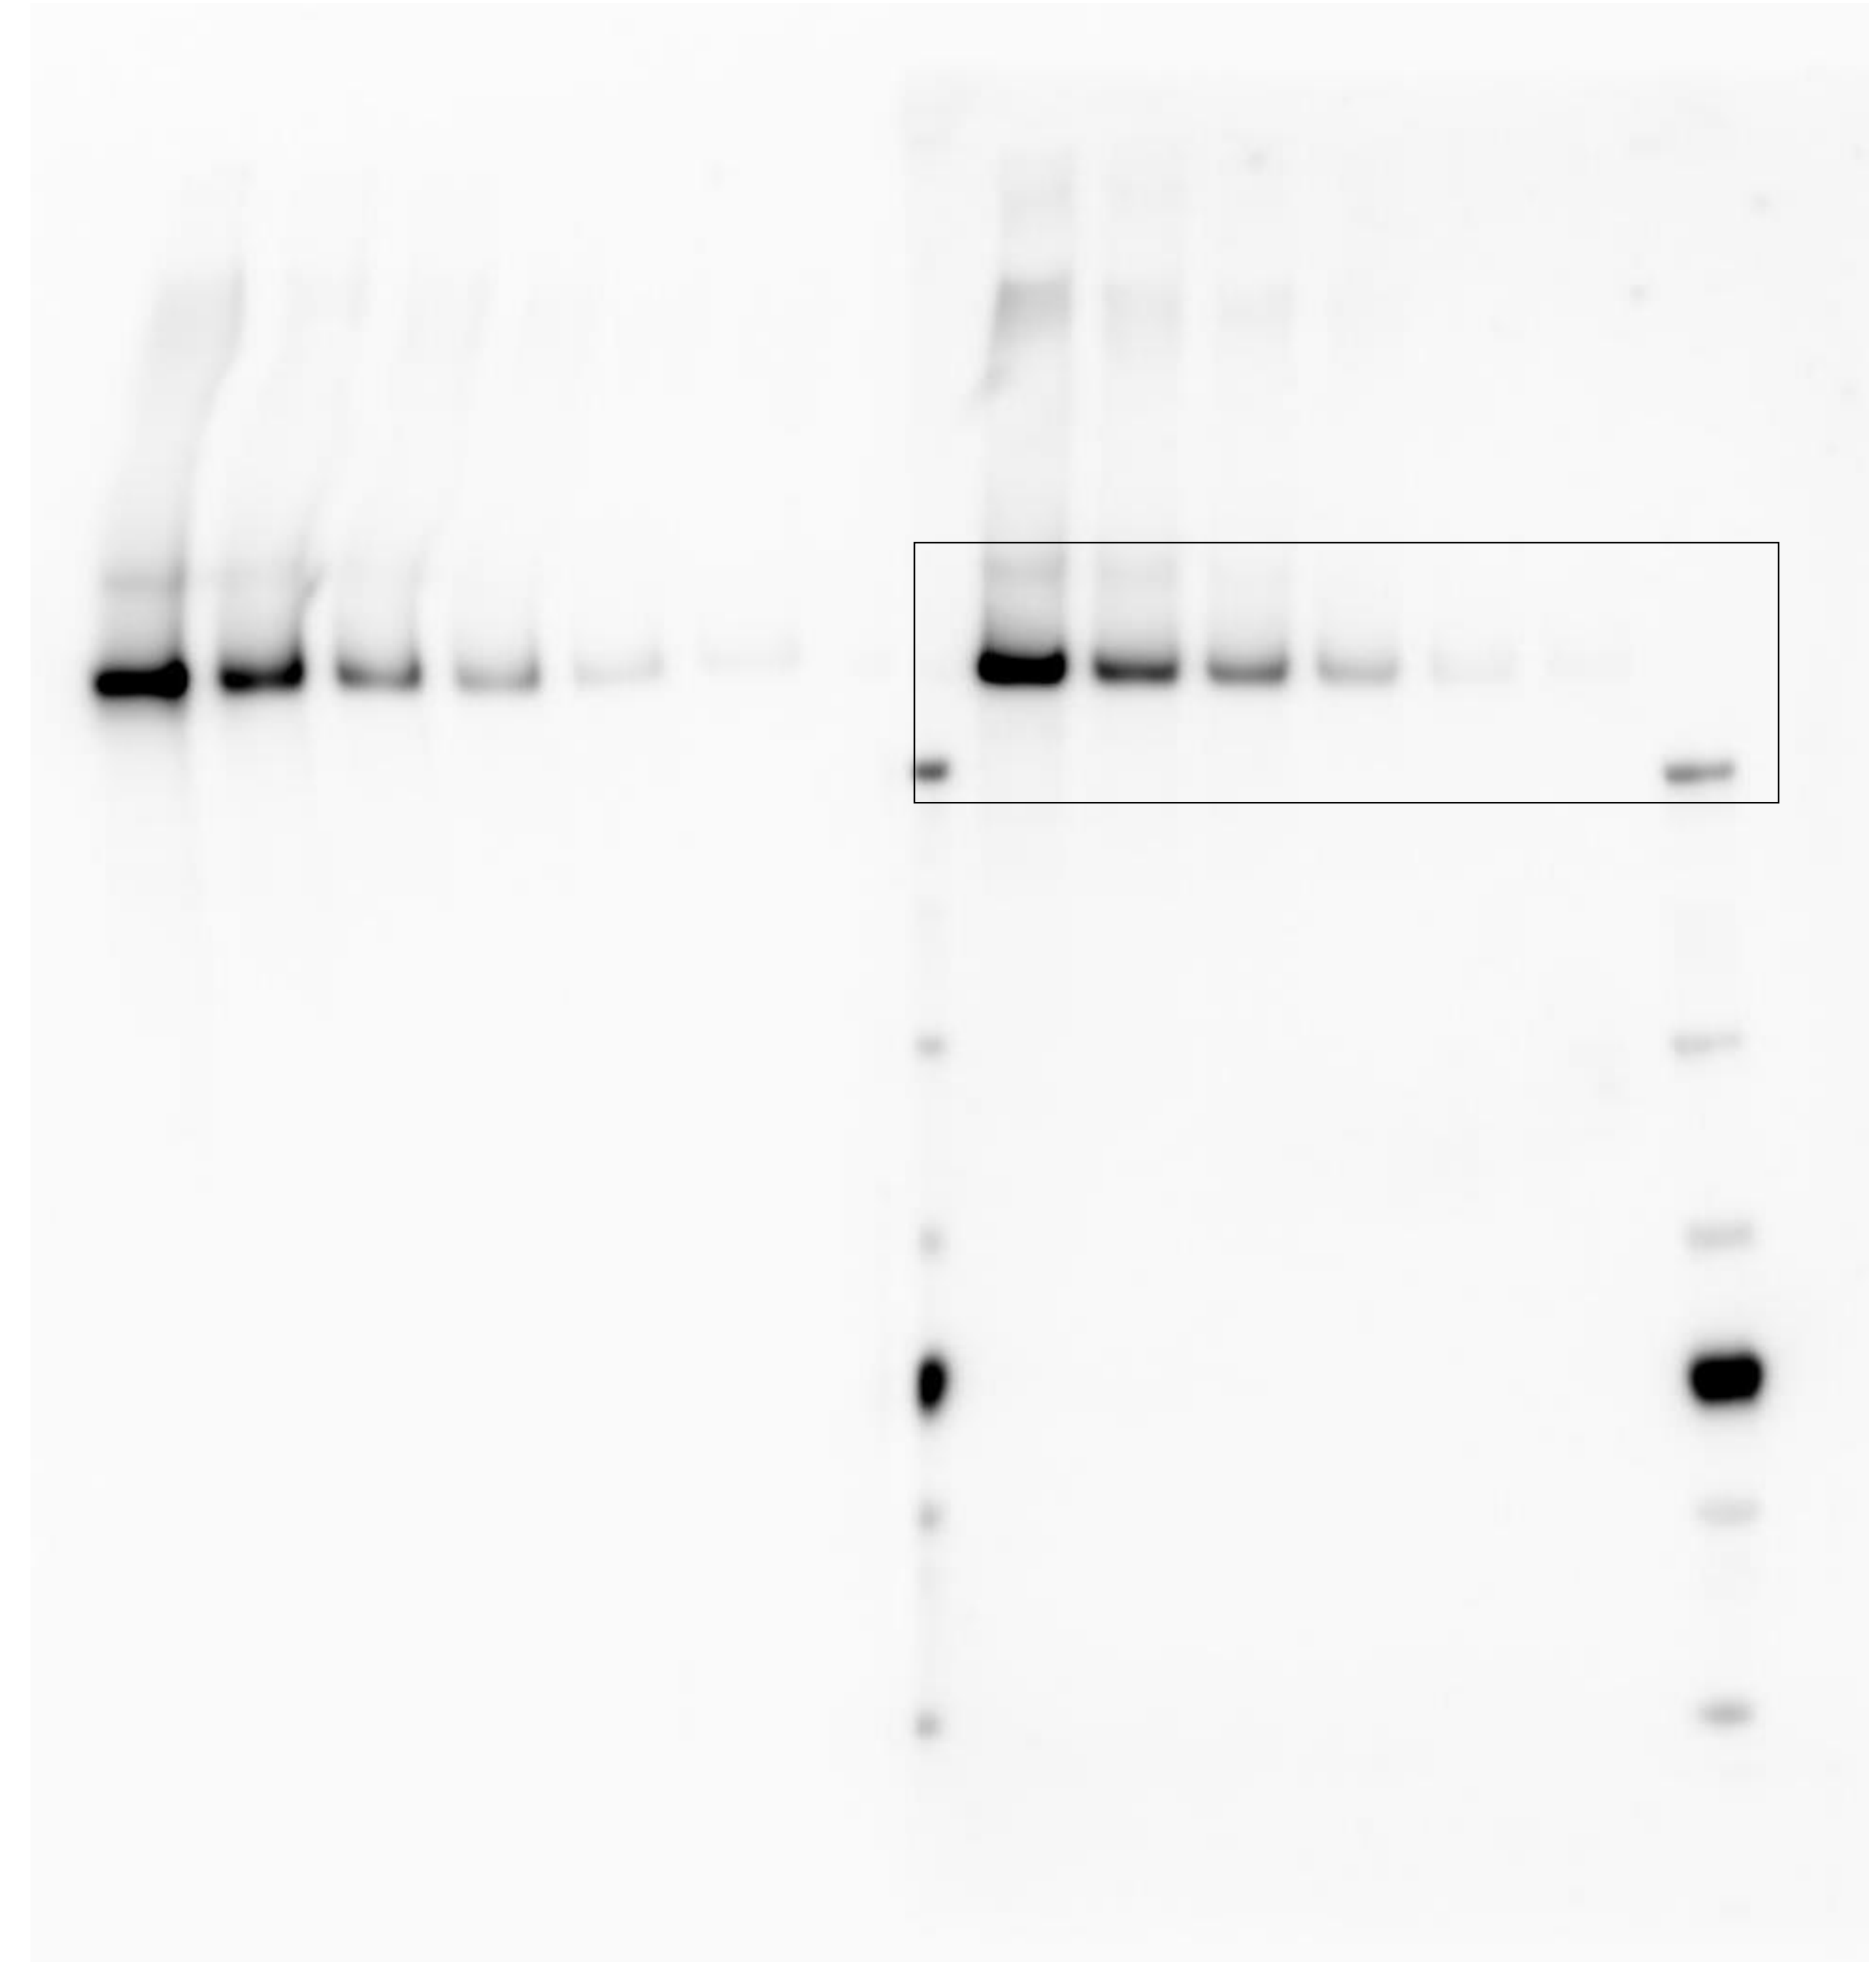

Suppl Figure 3a

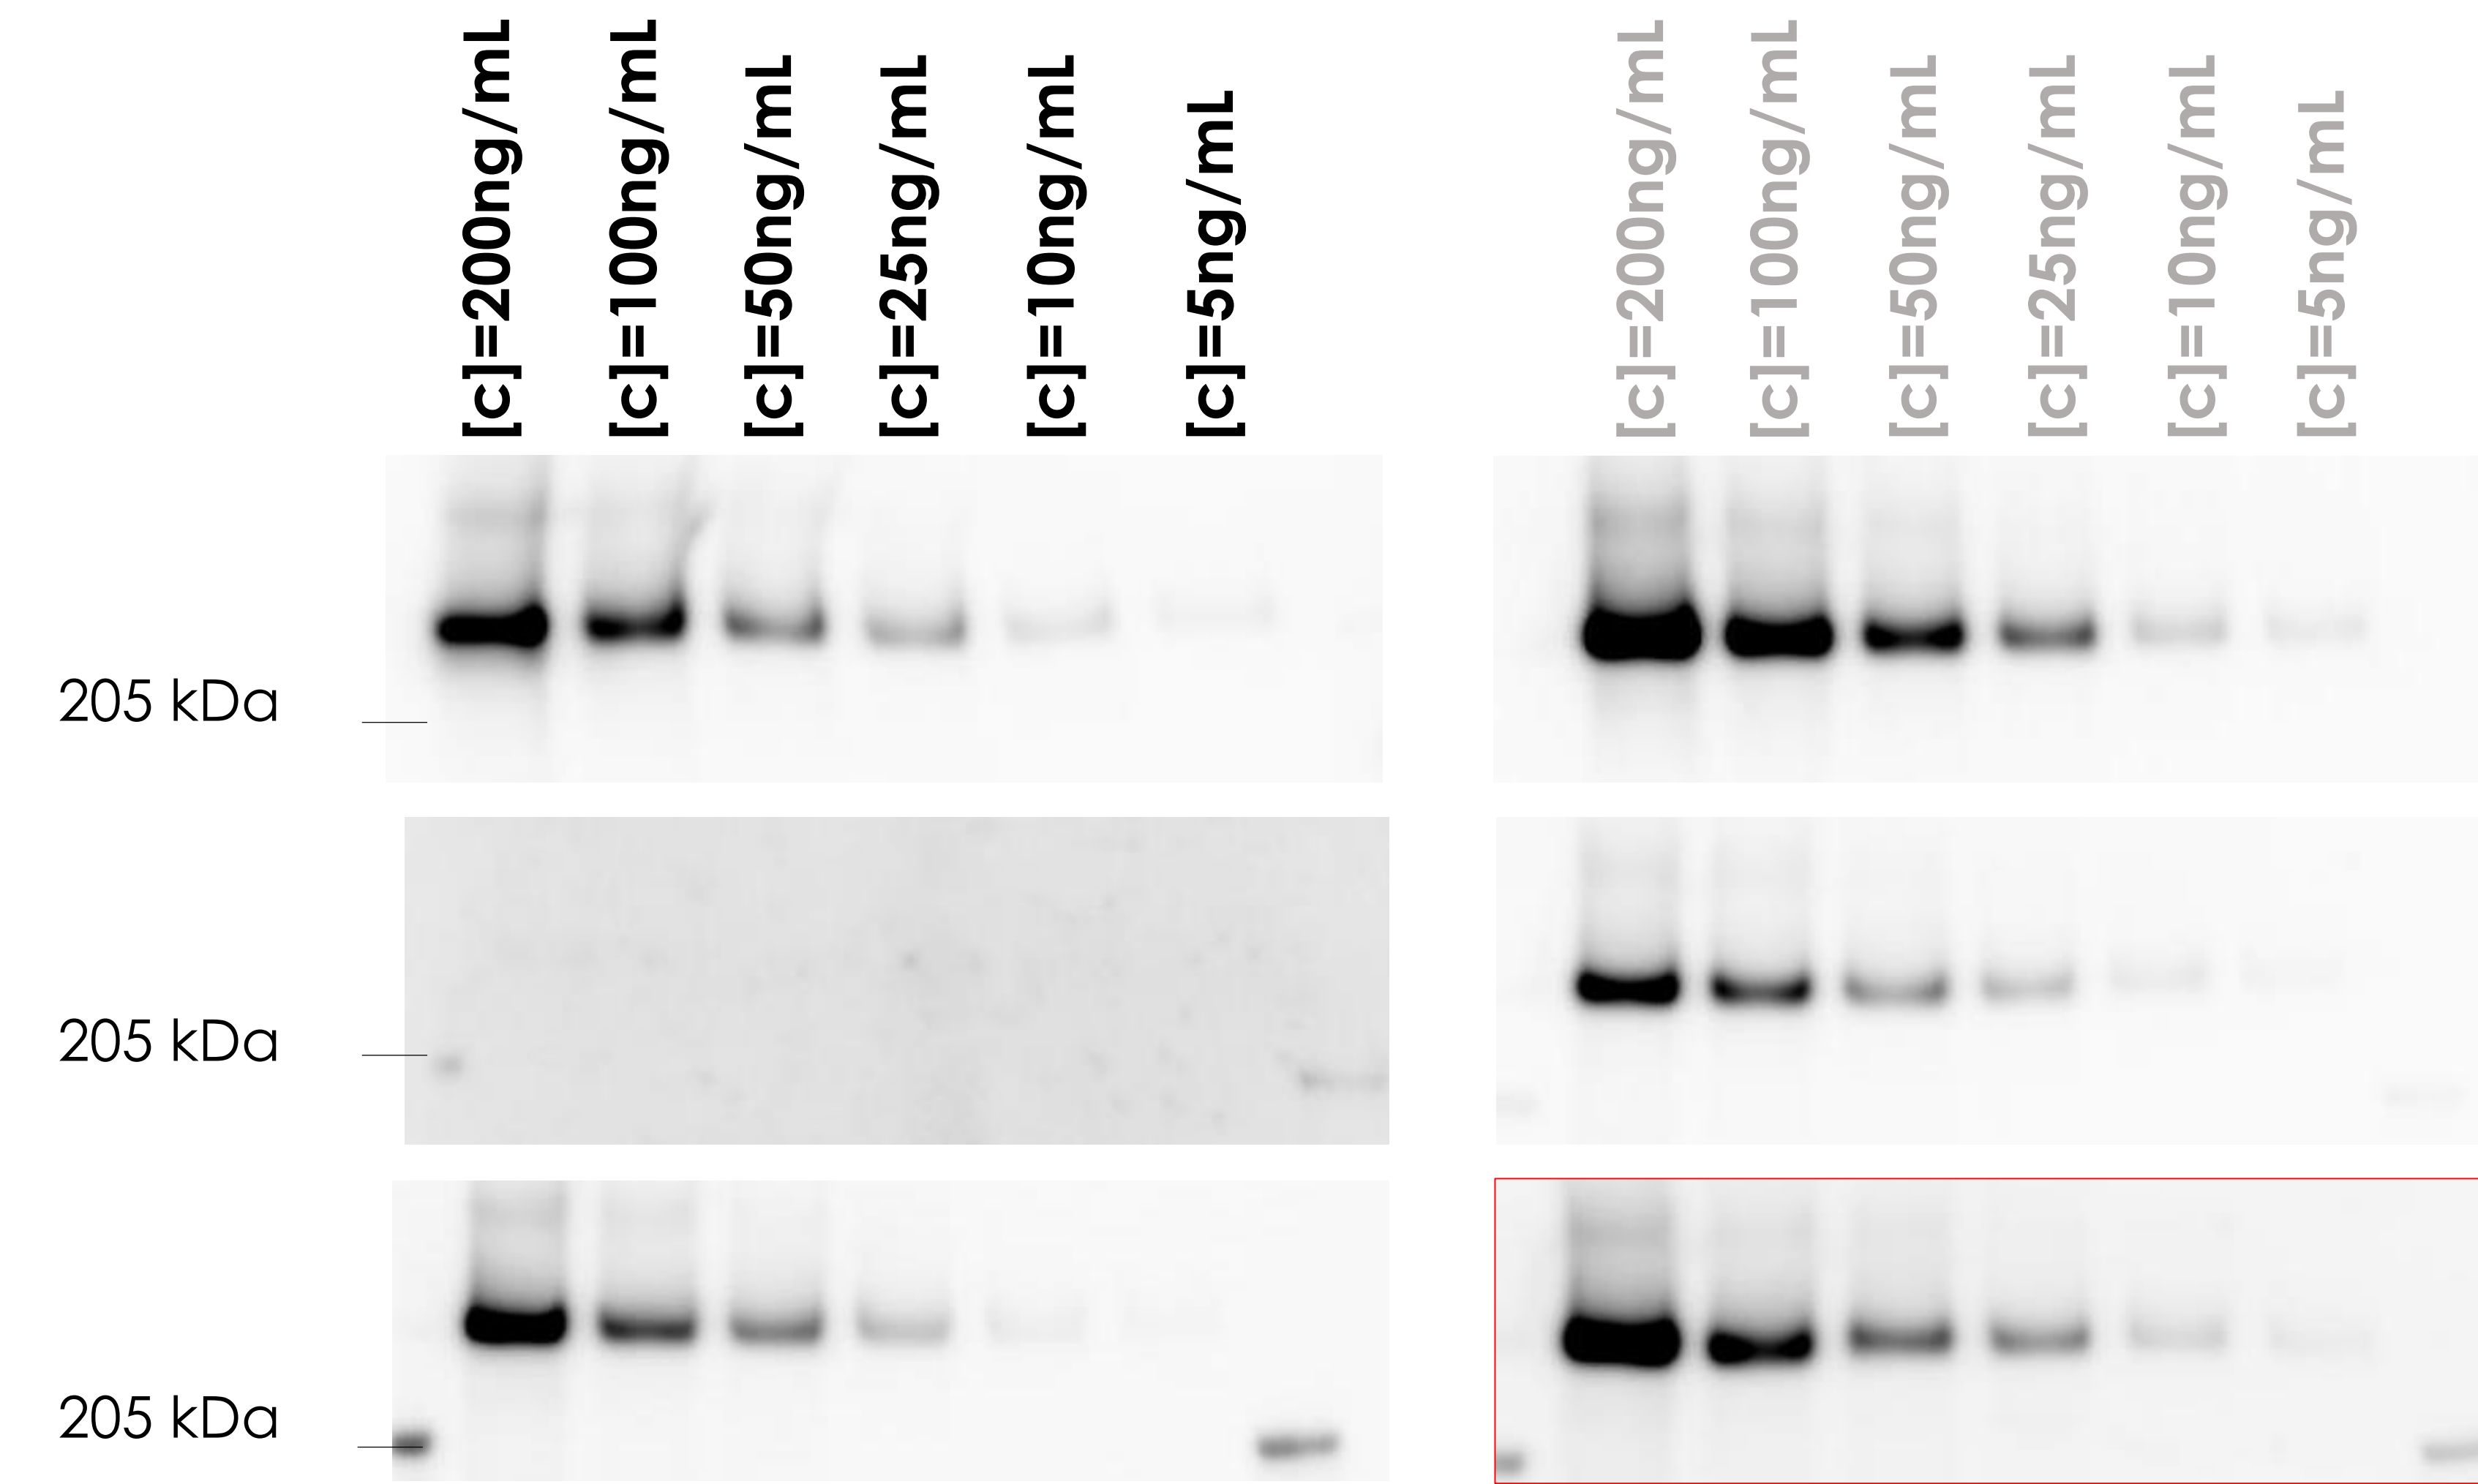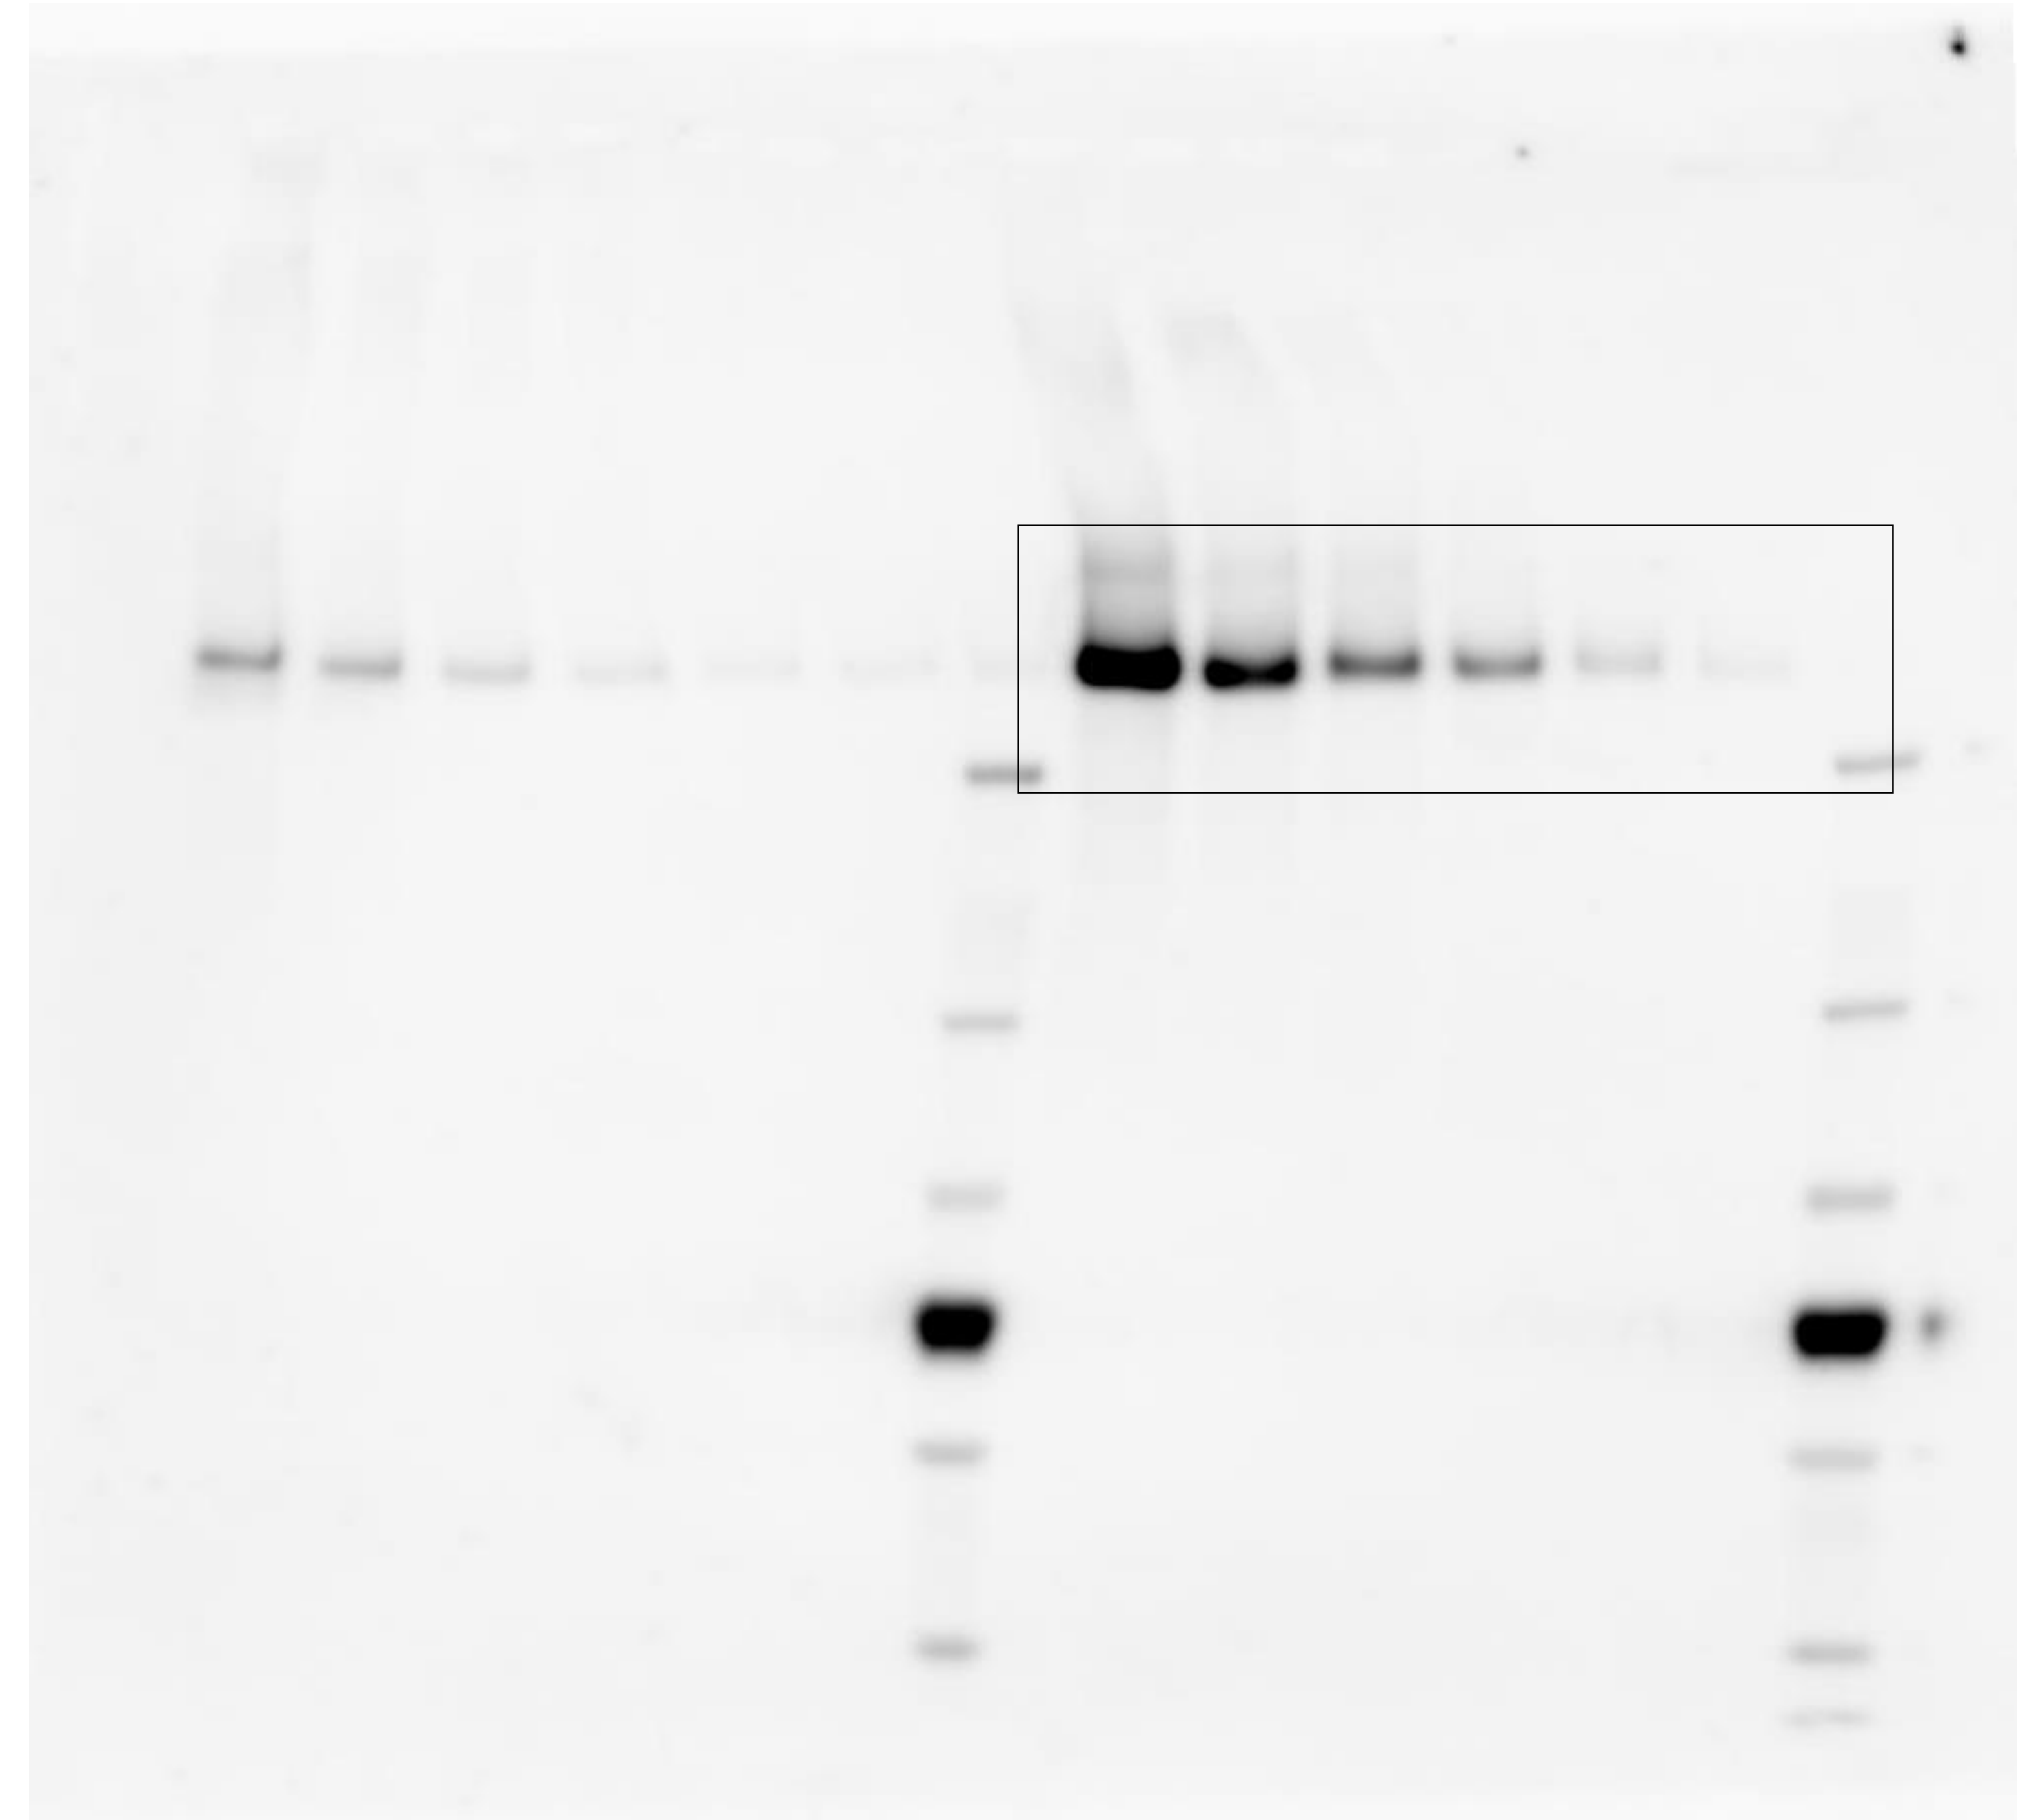



Suppl Figure 5a

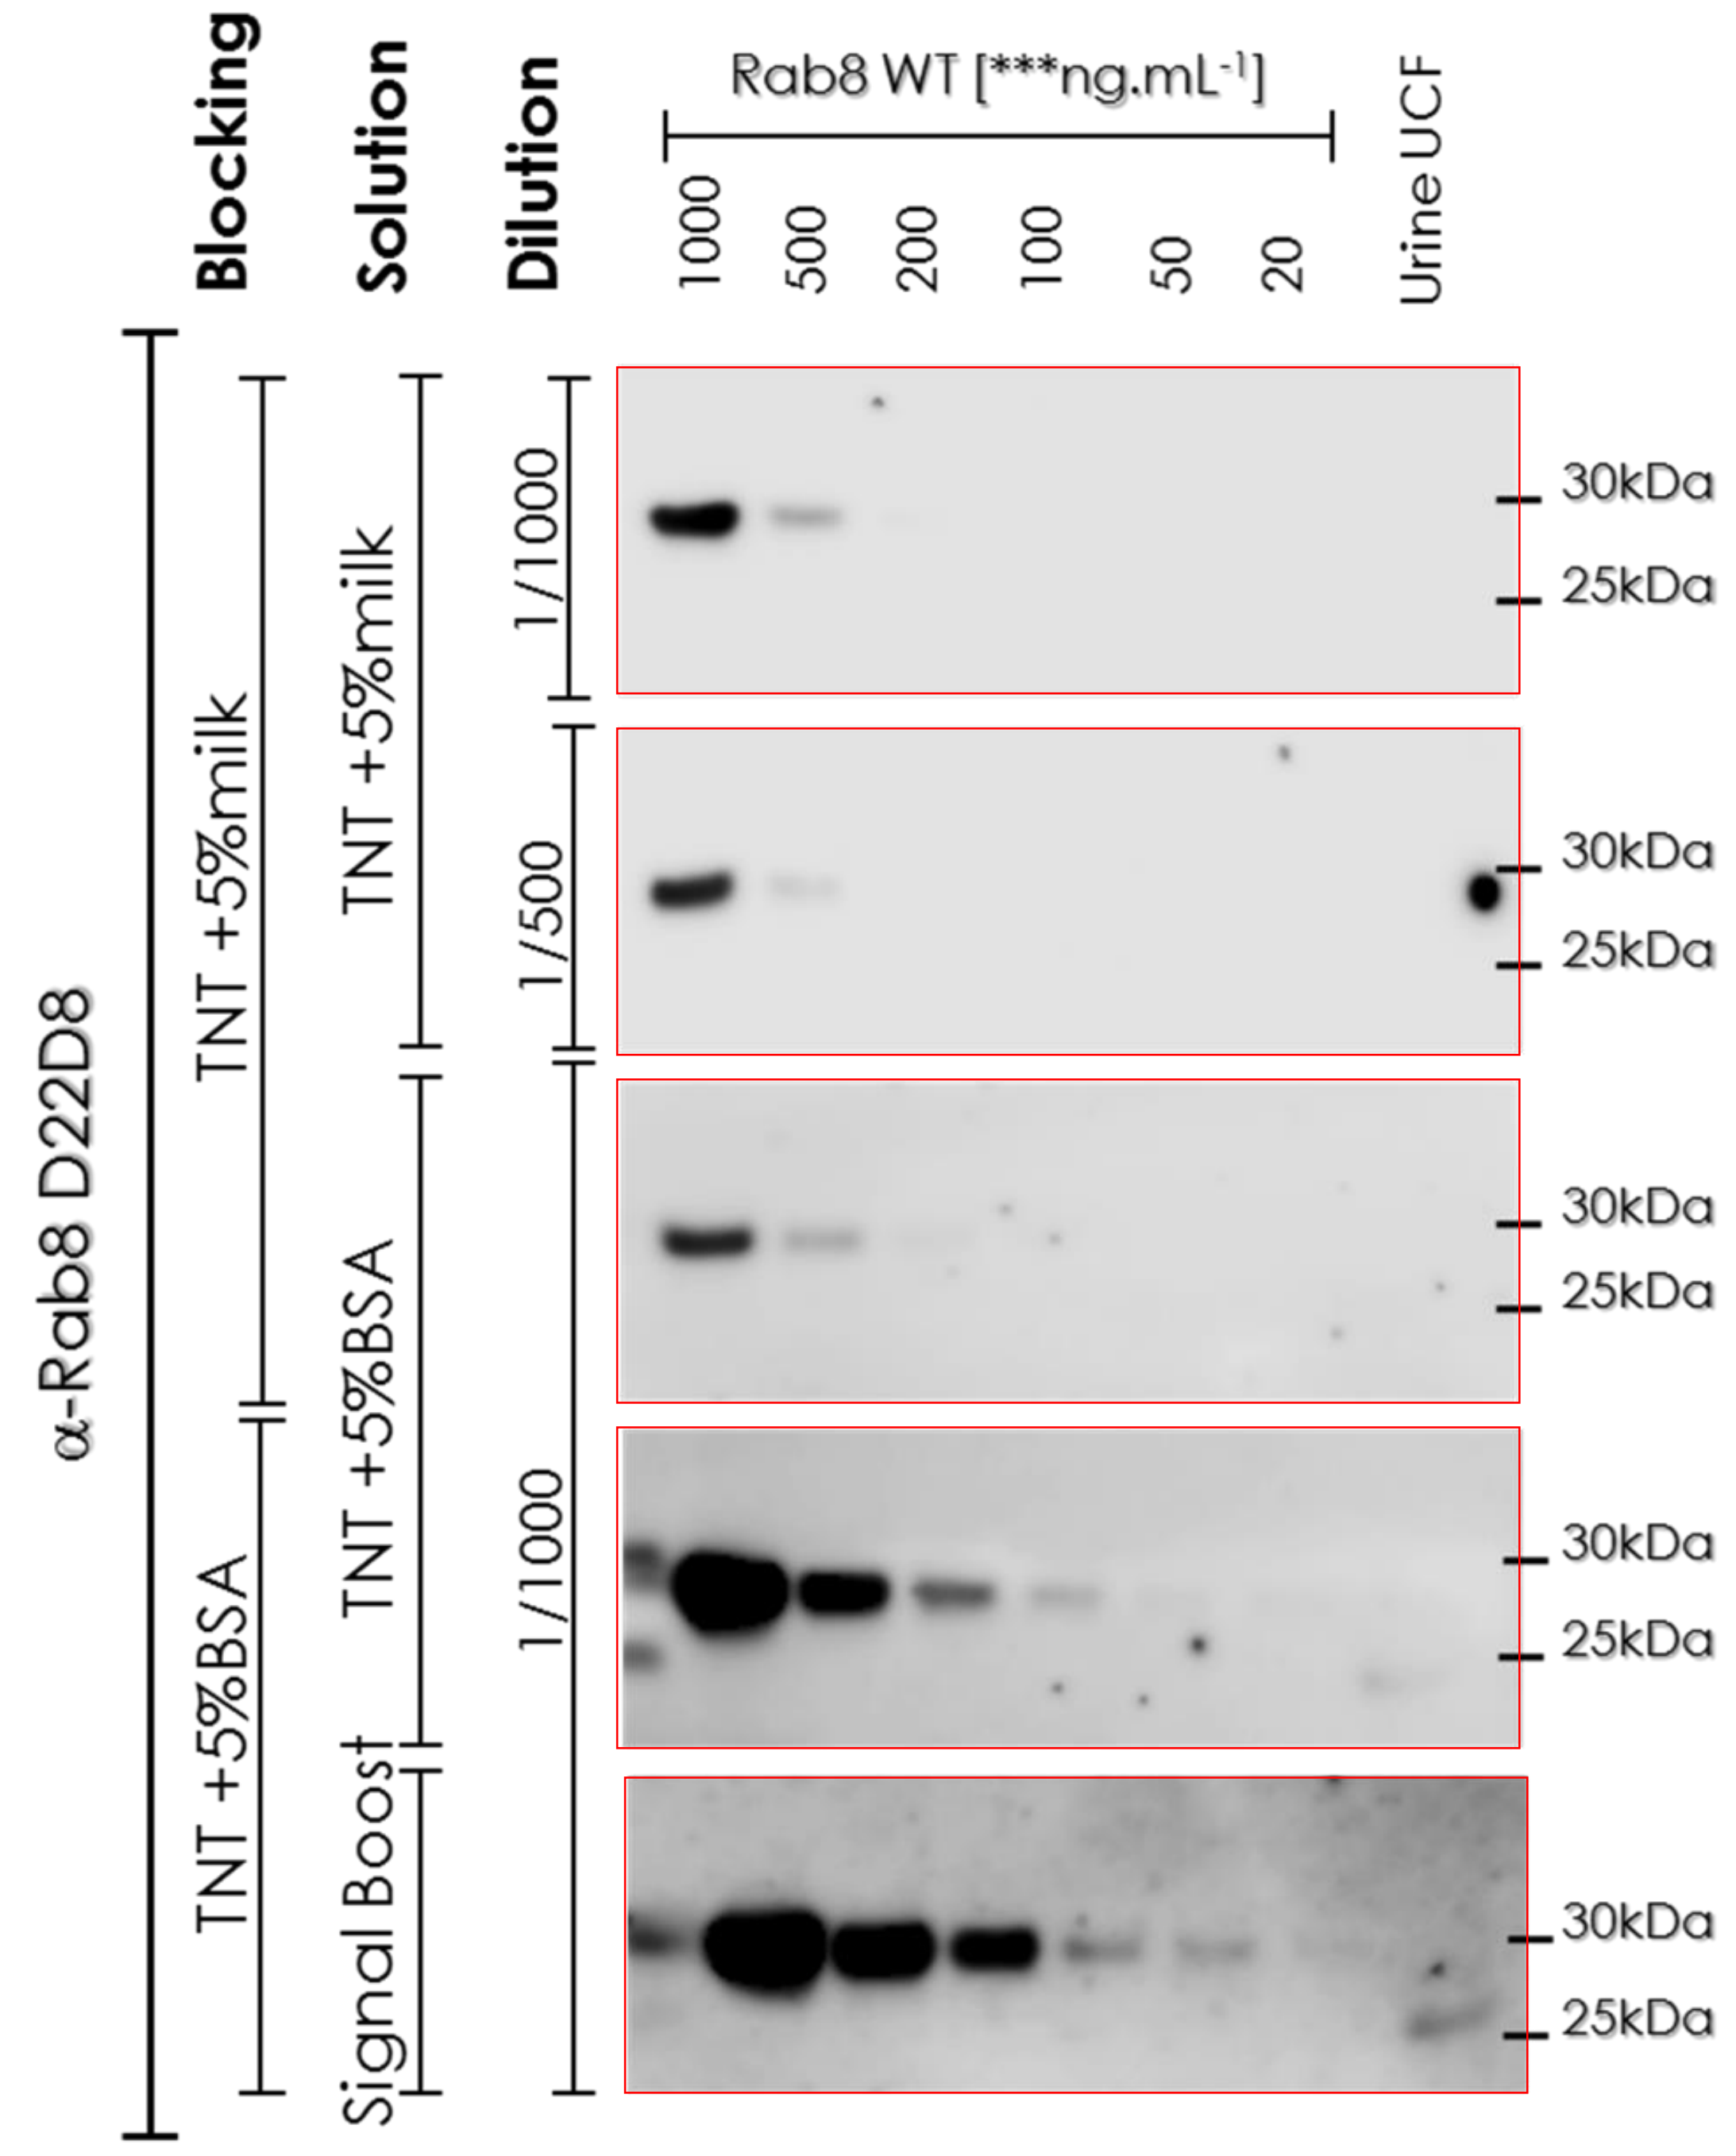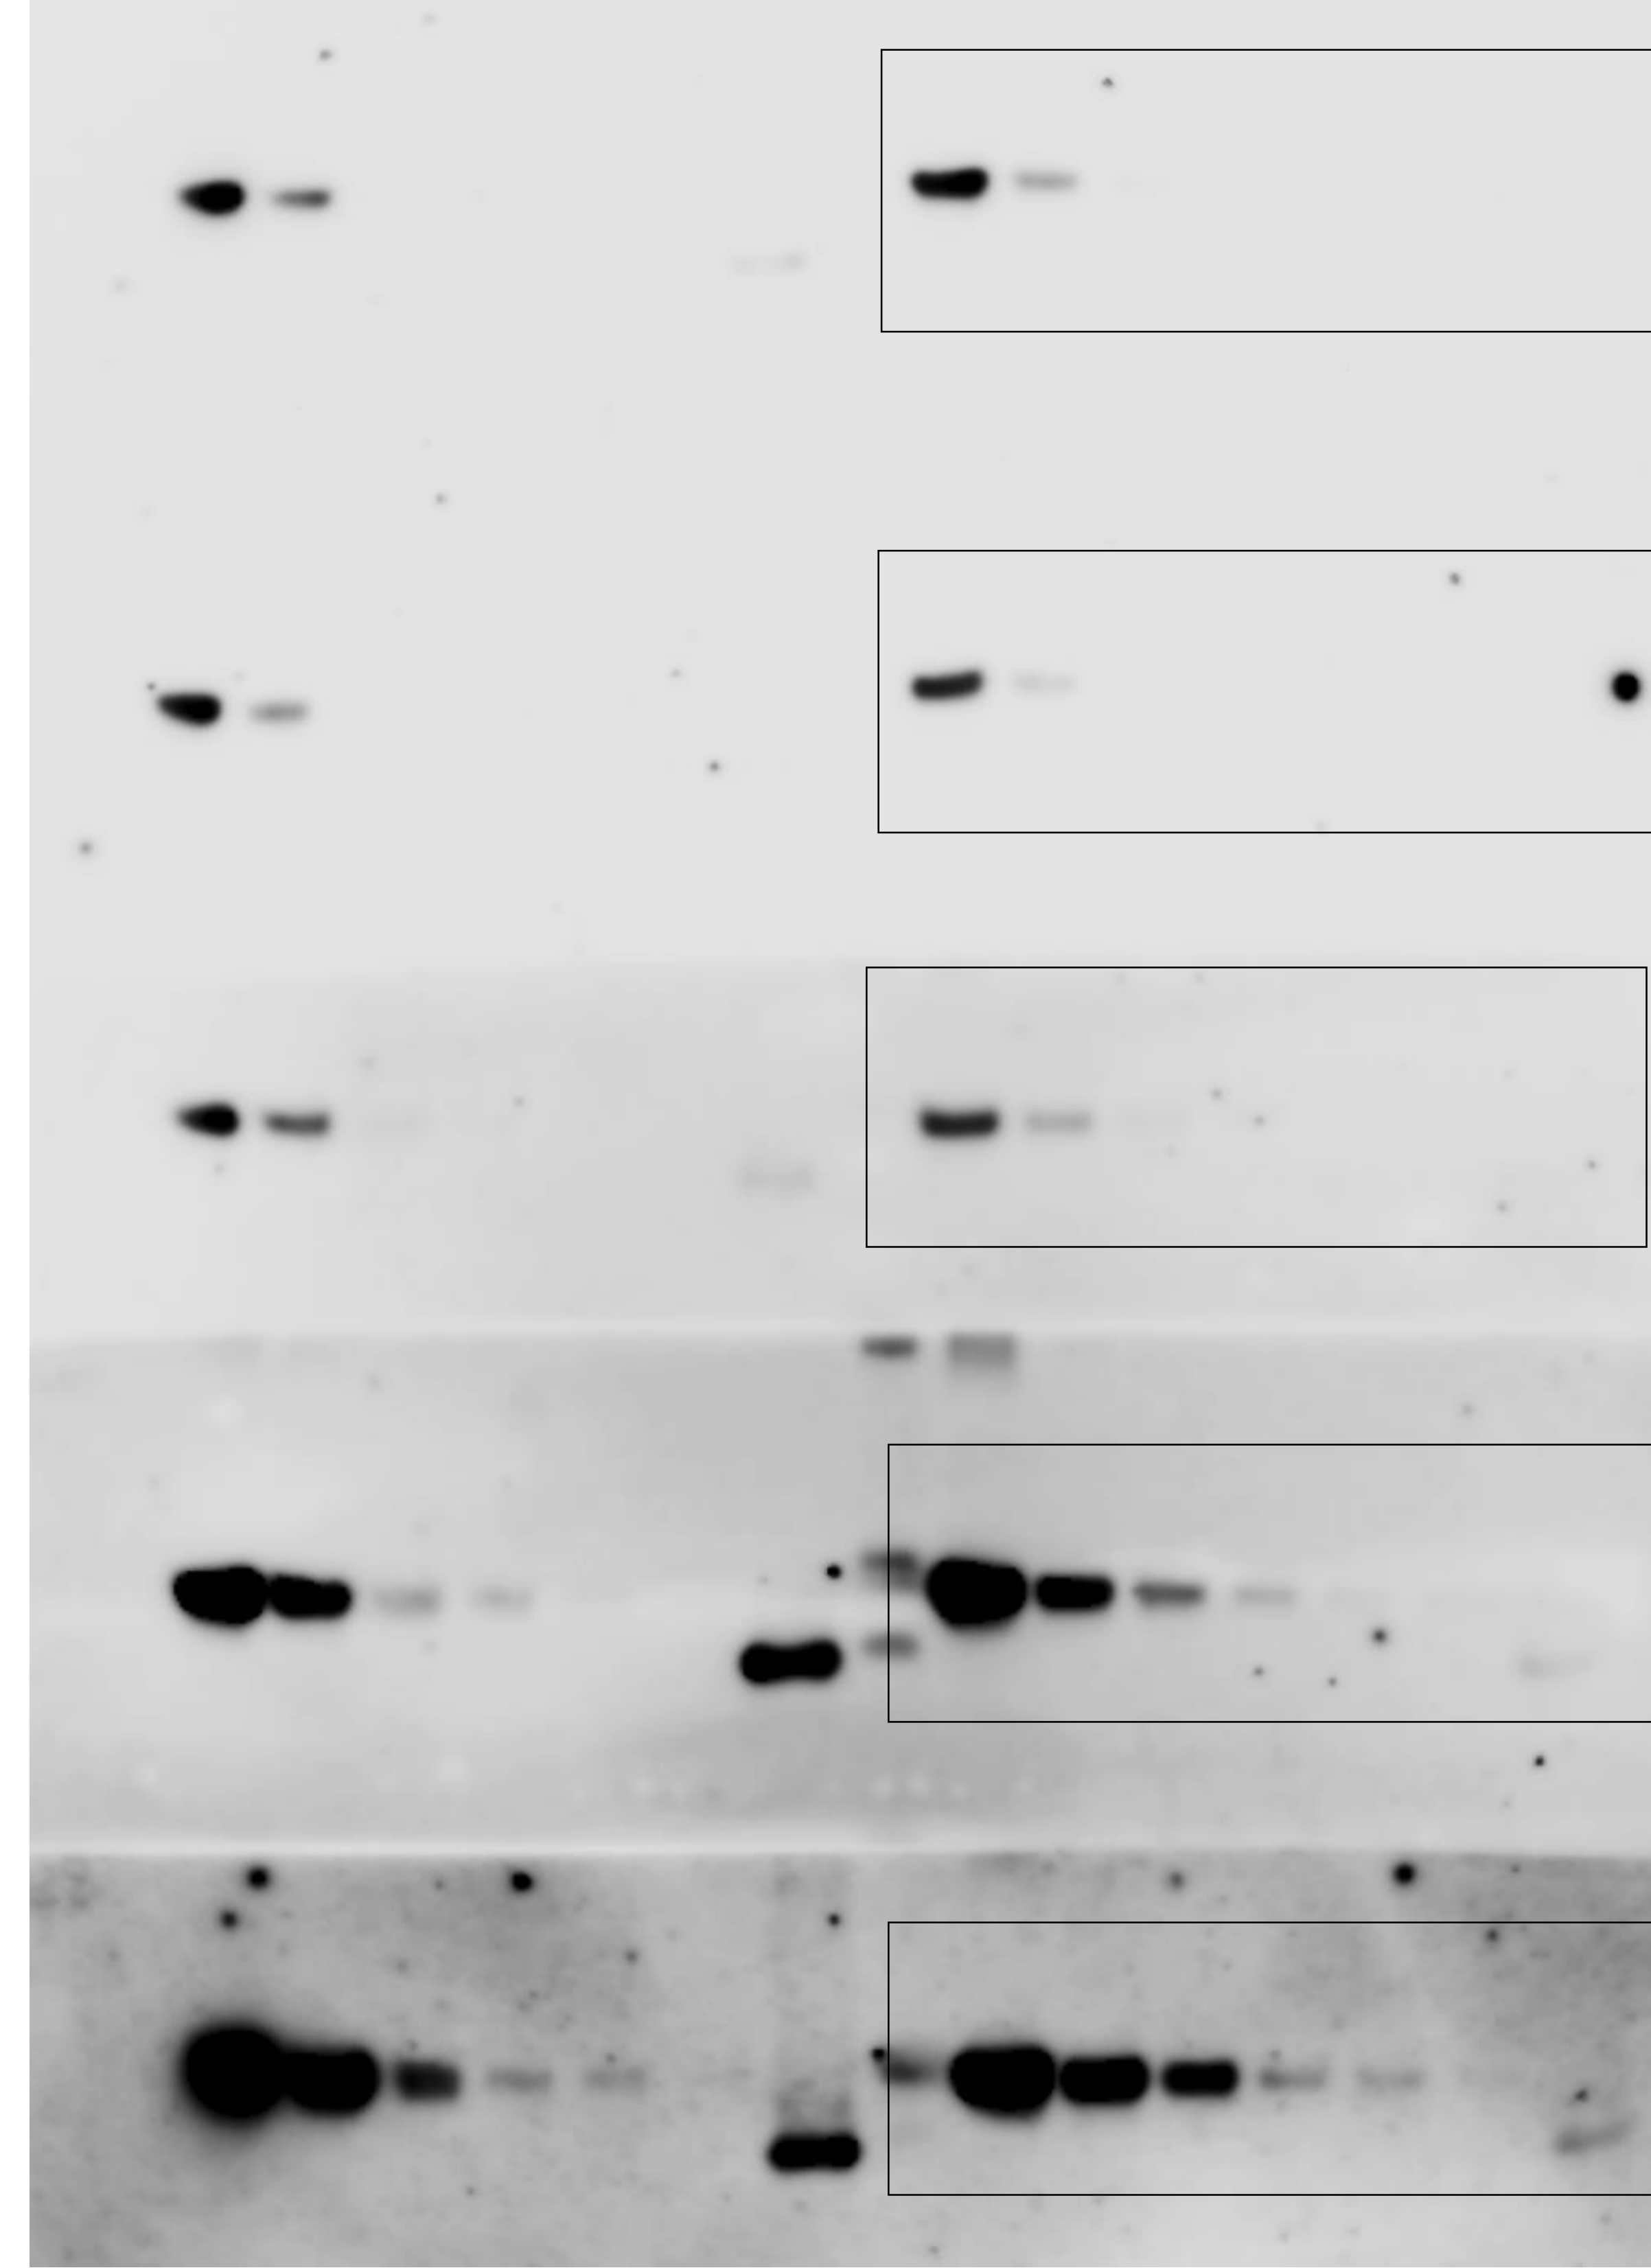

Suppl Figure 5b

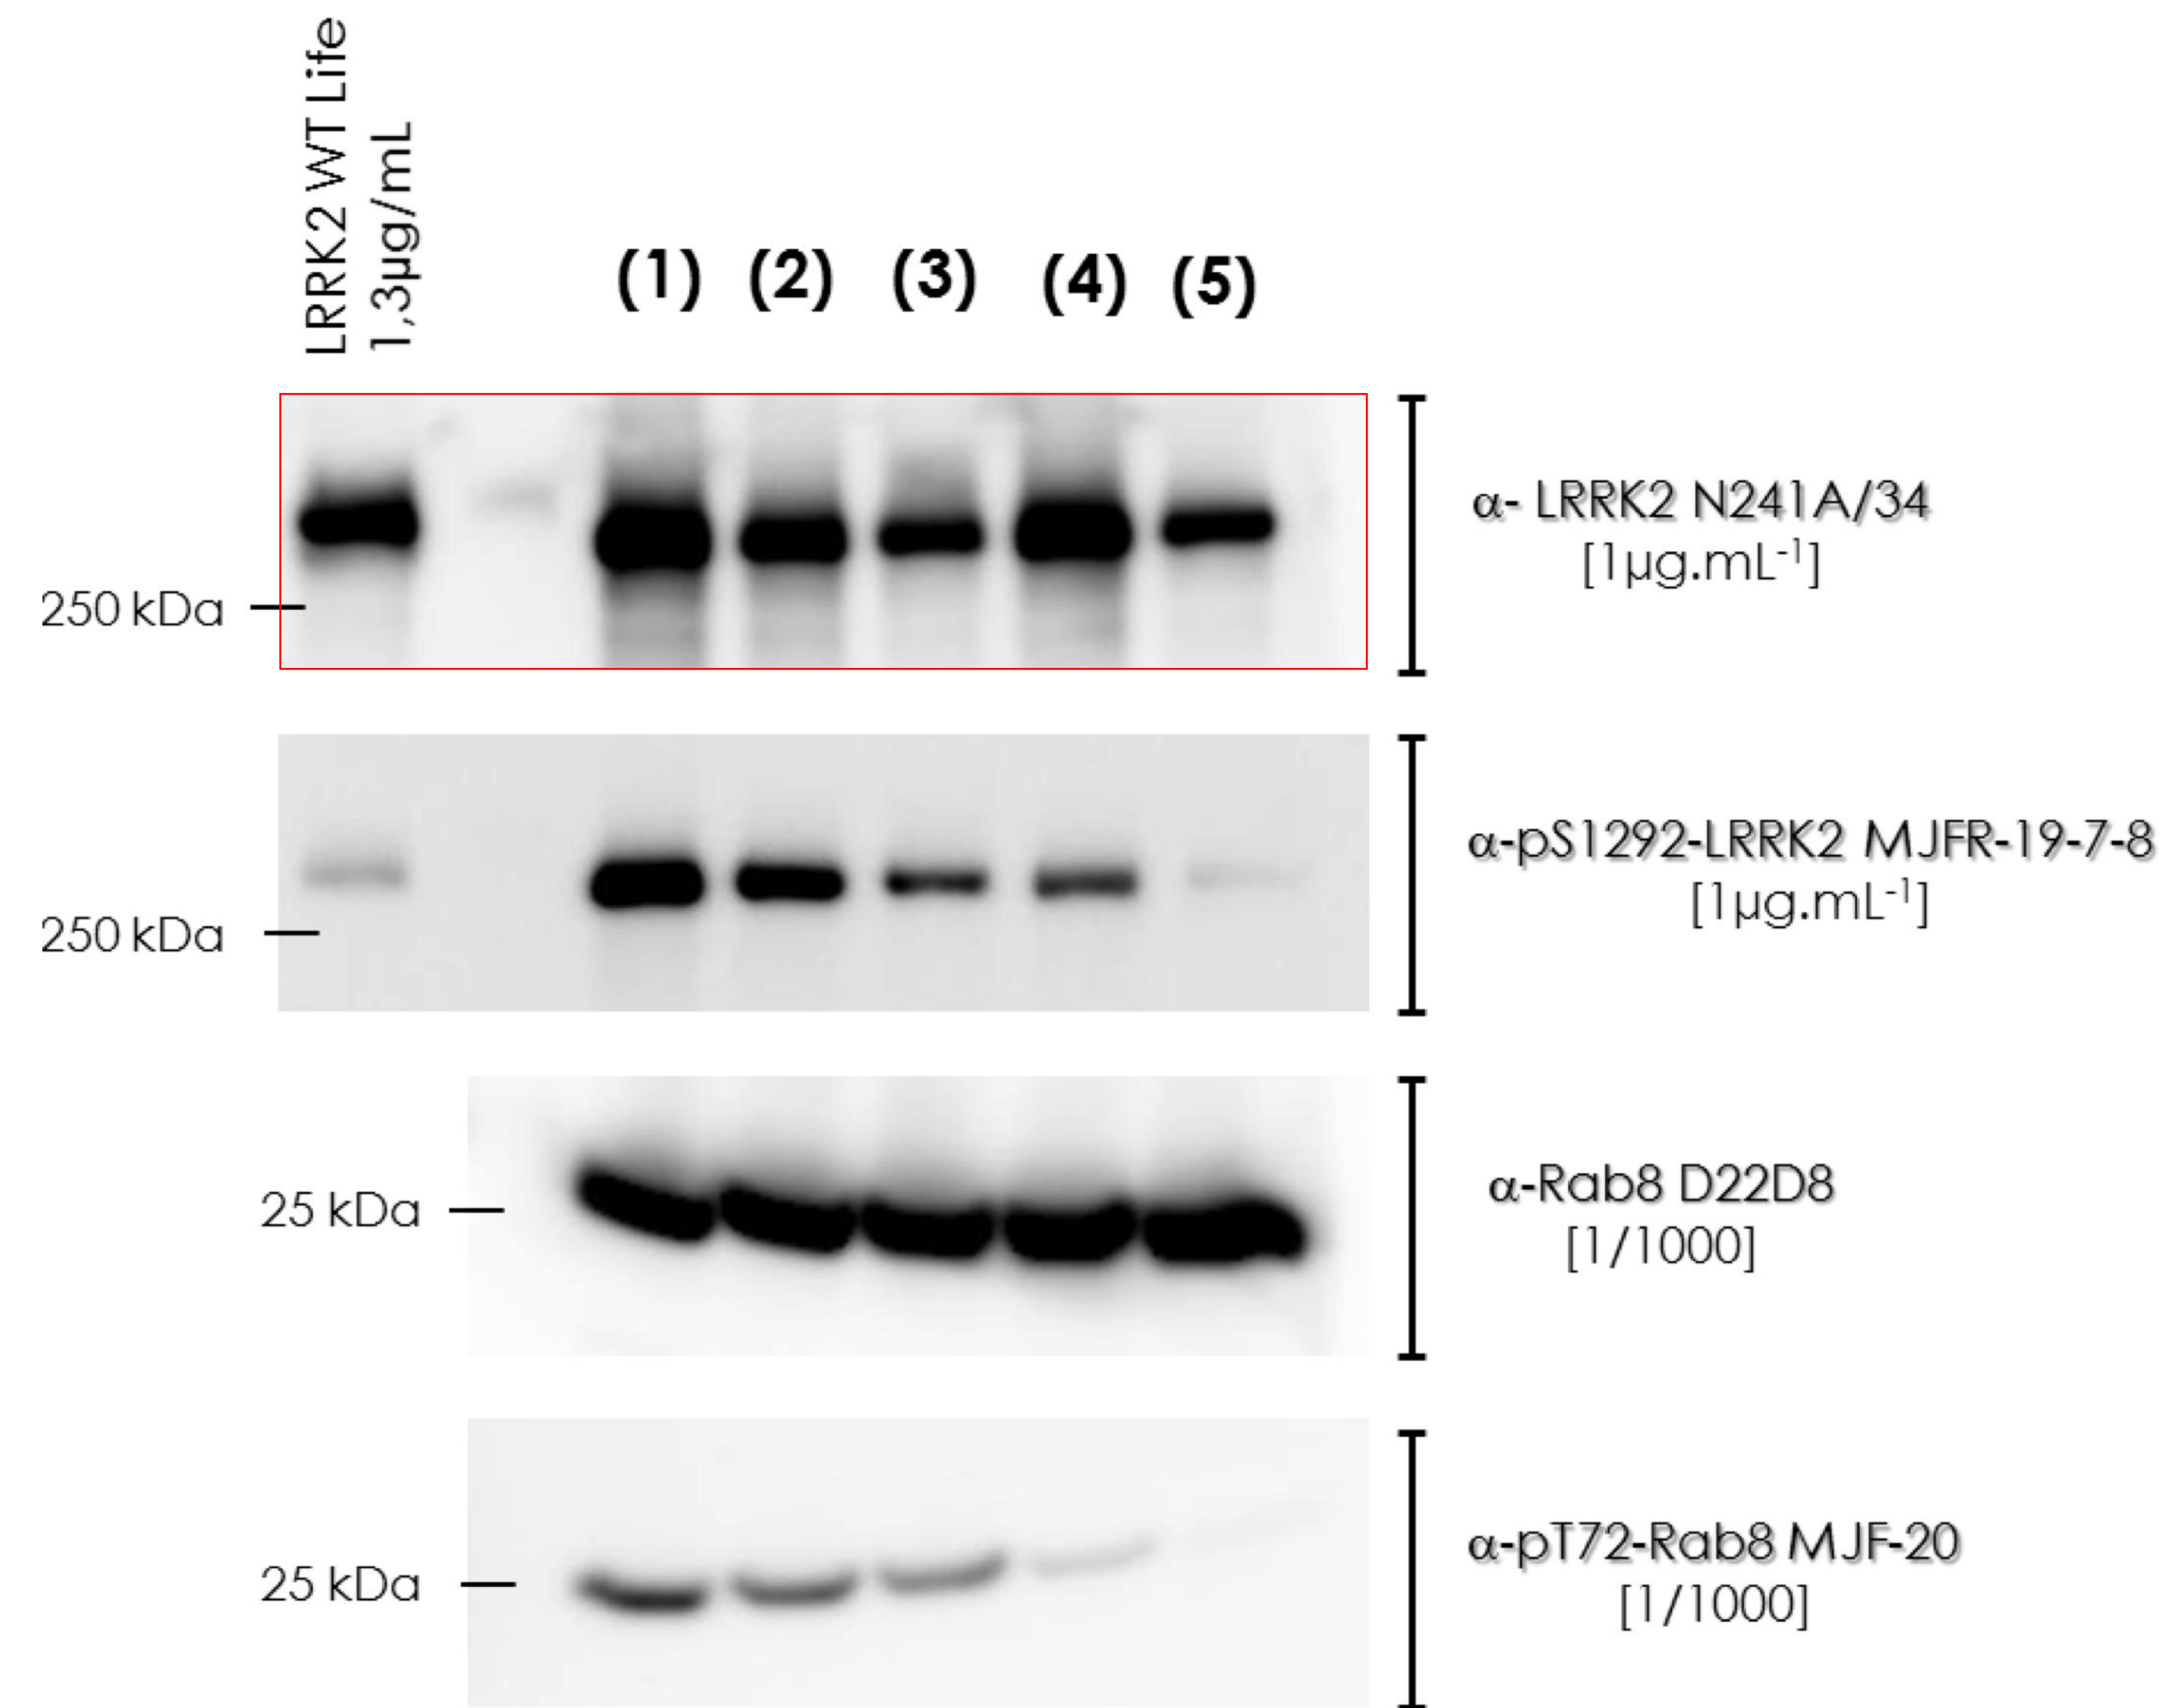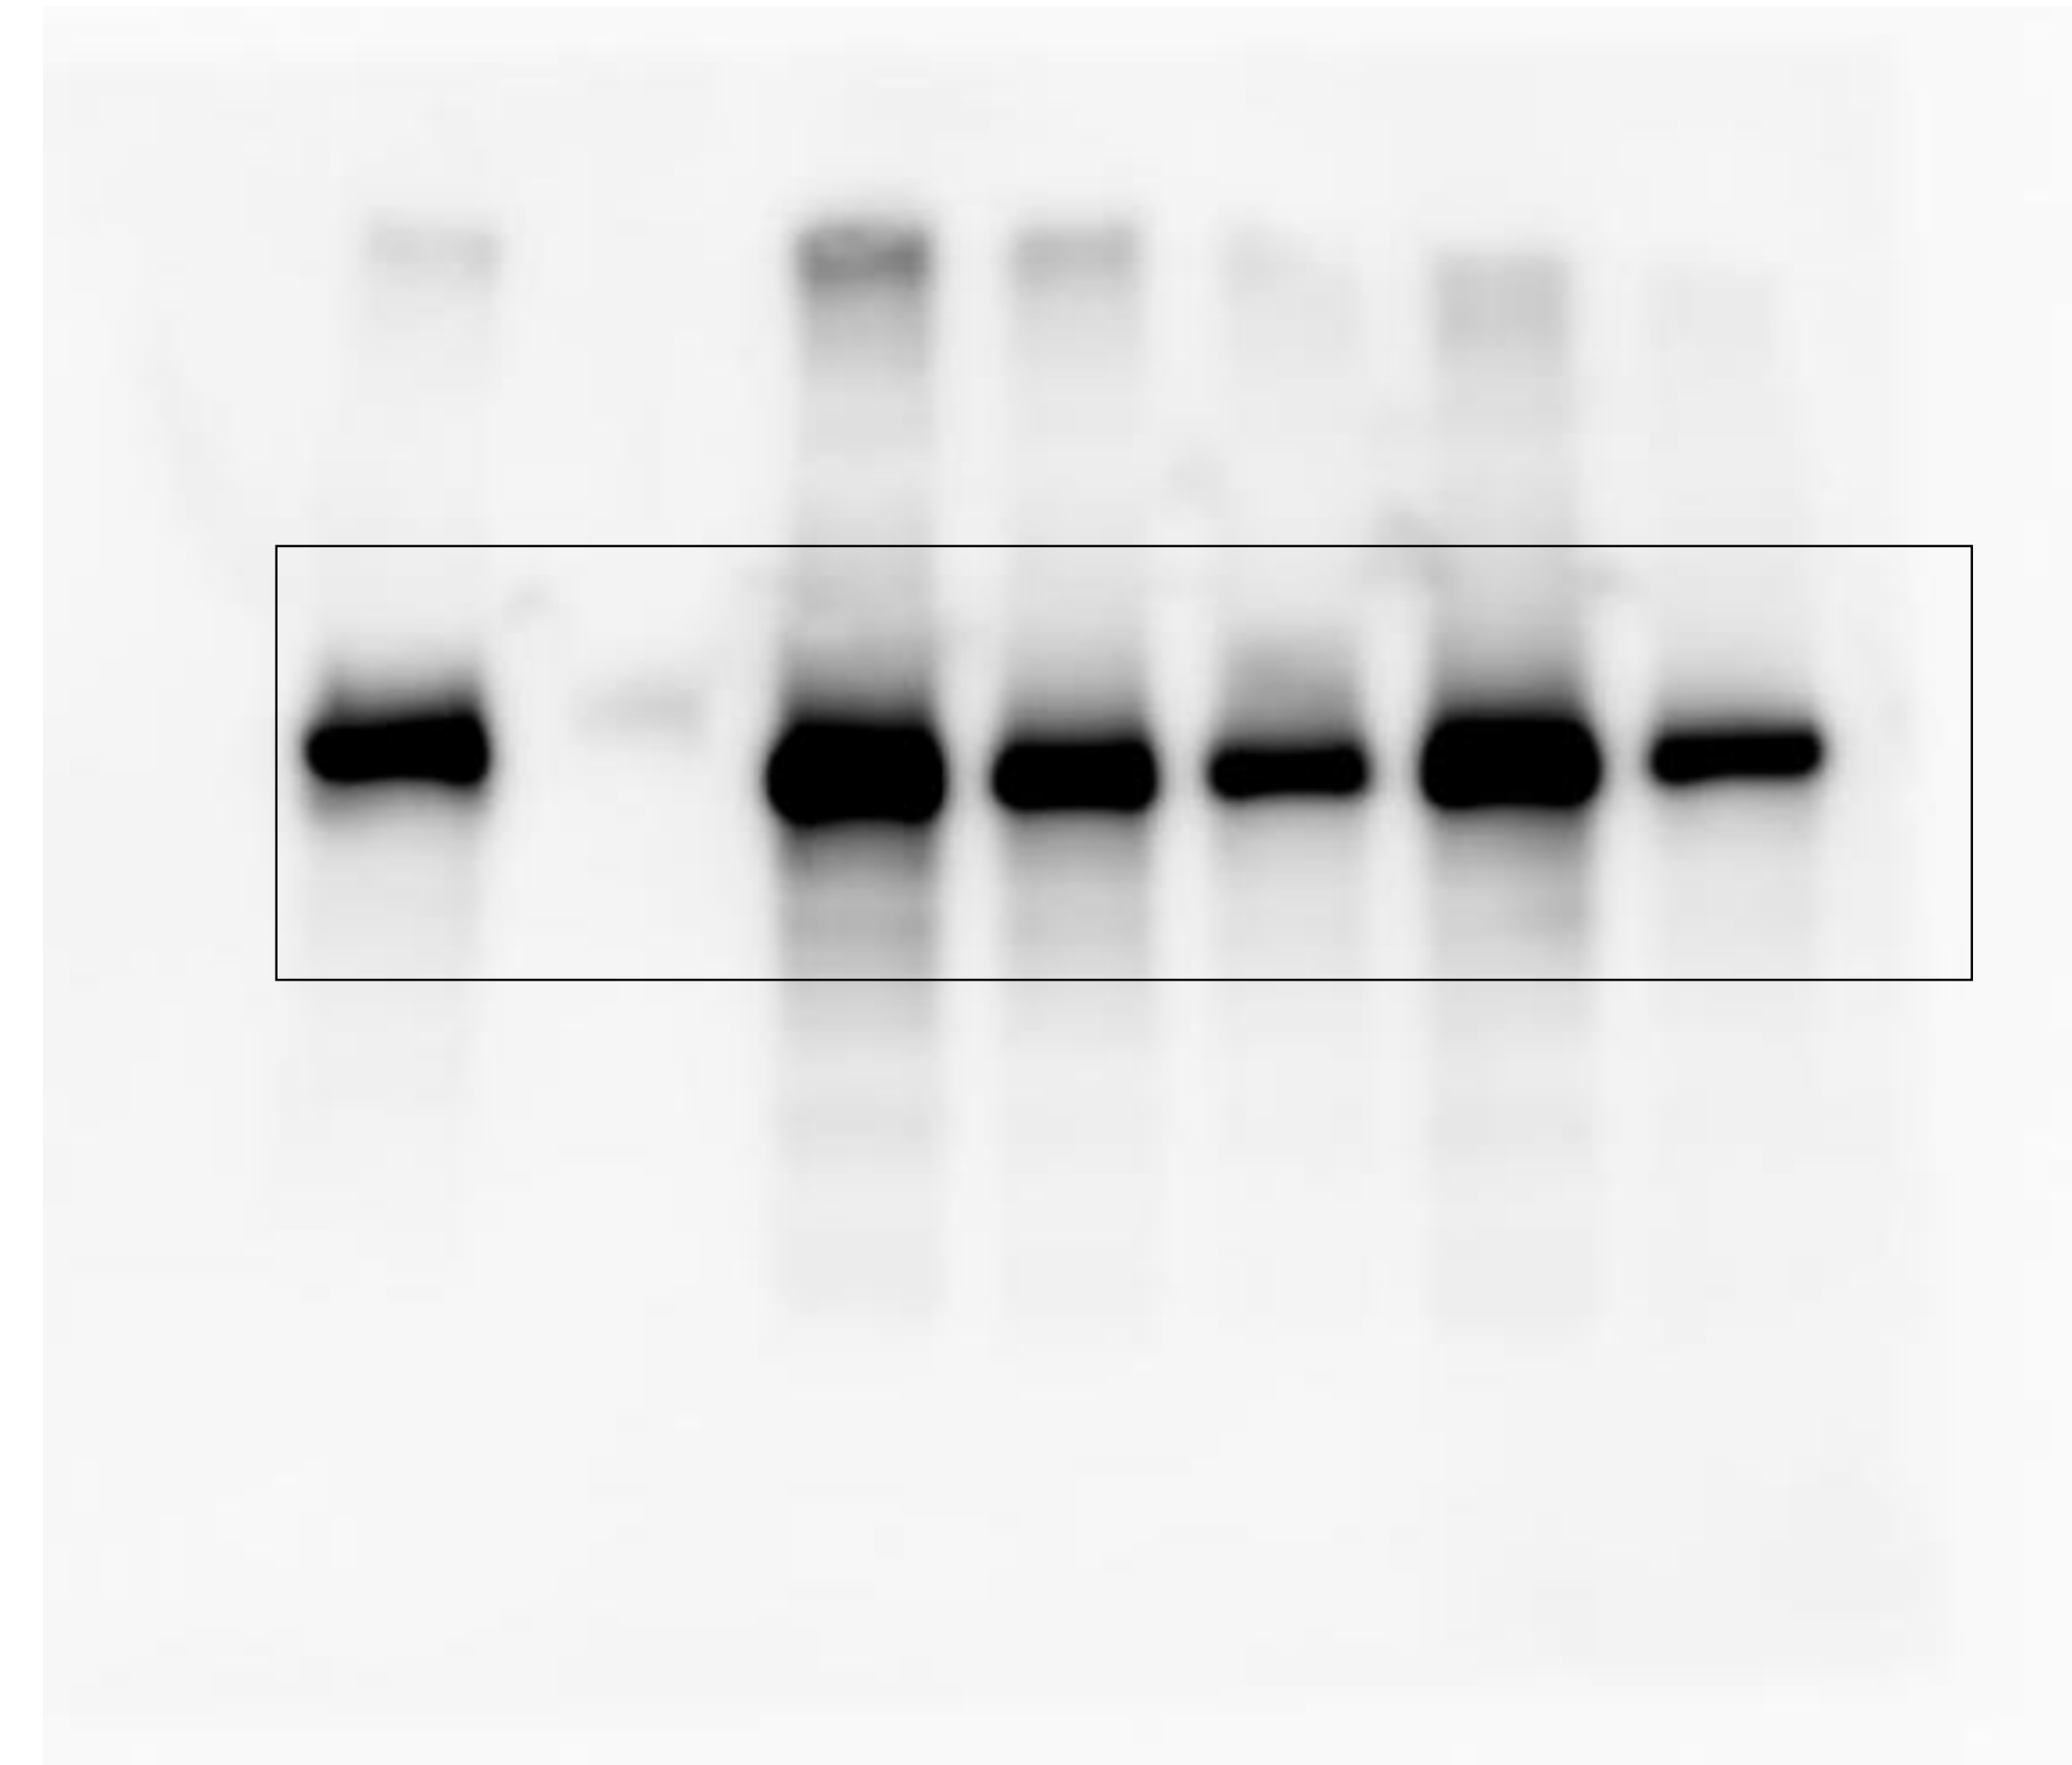

Suppl Figure 5b

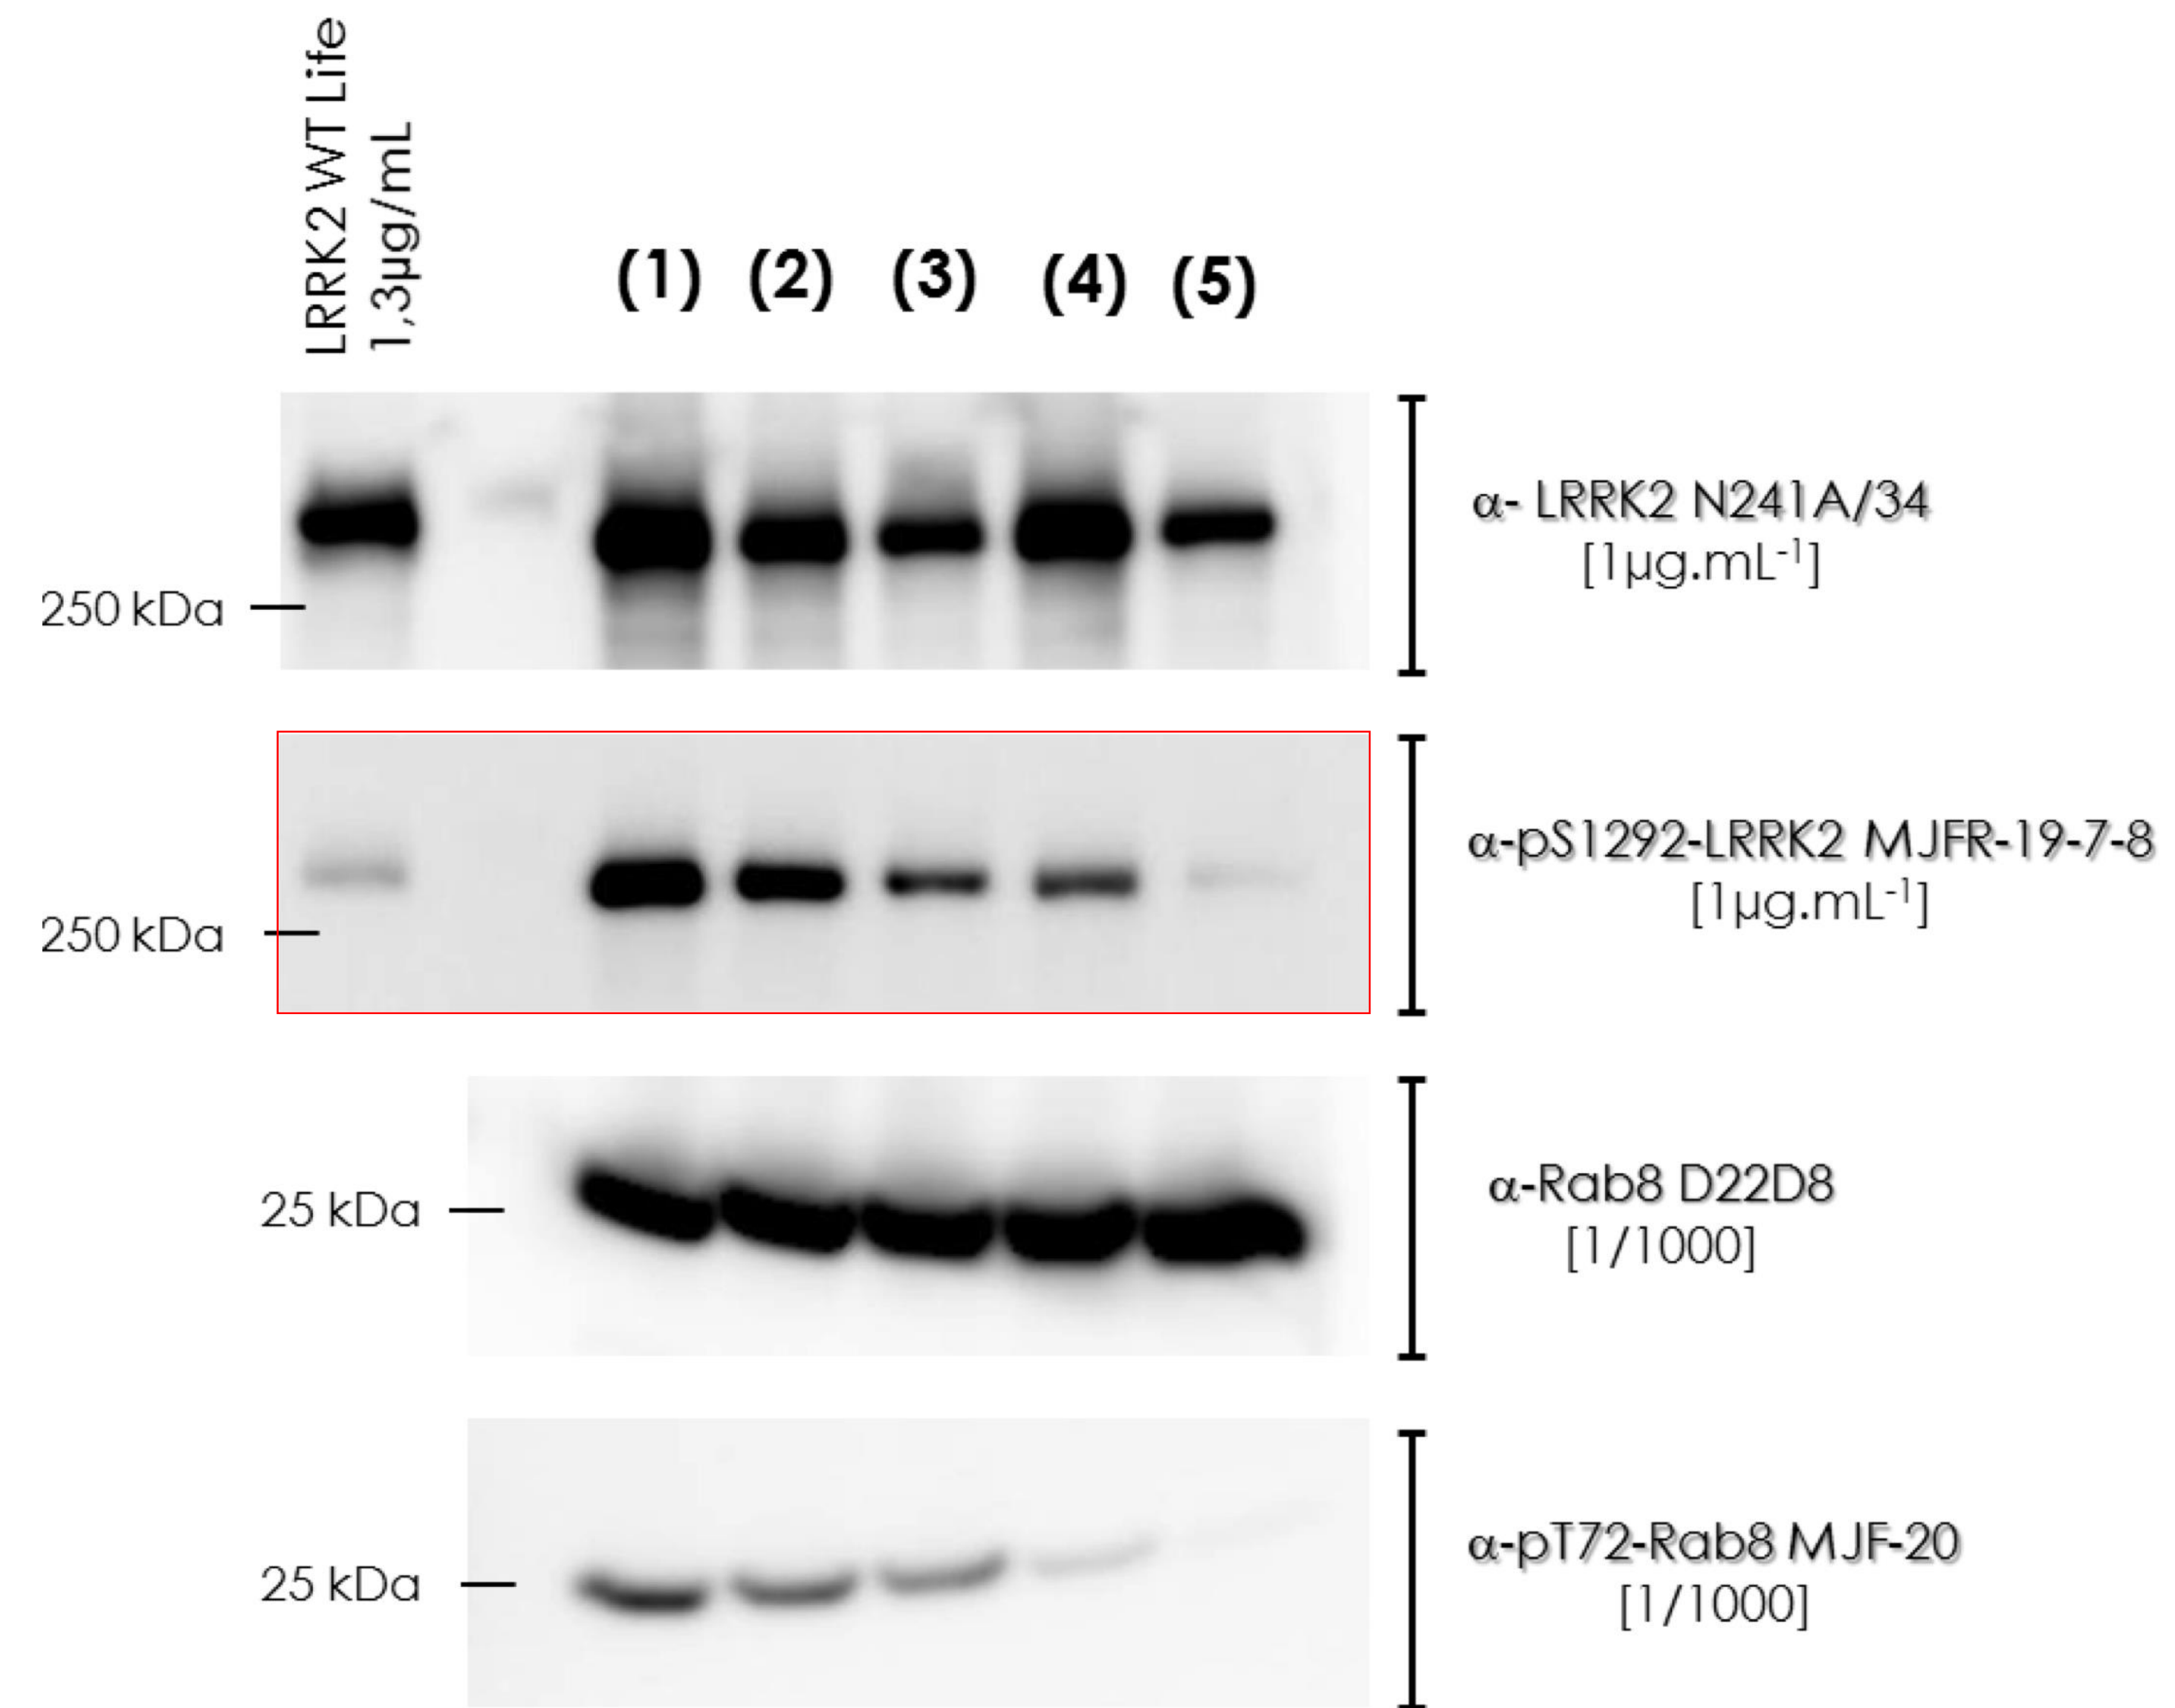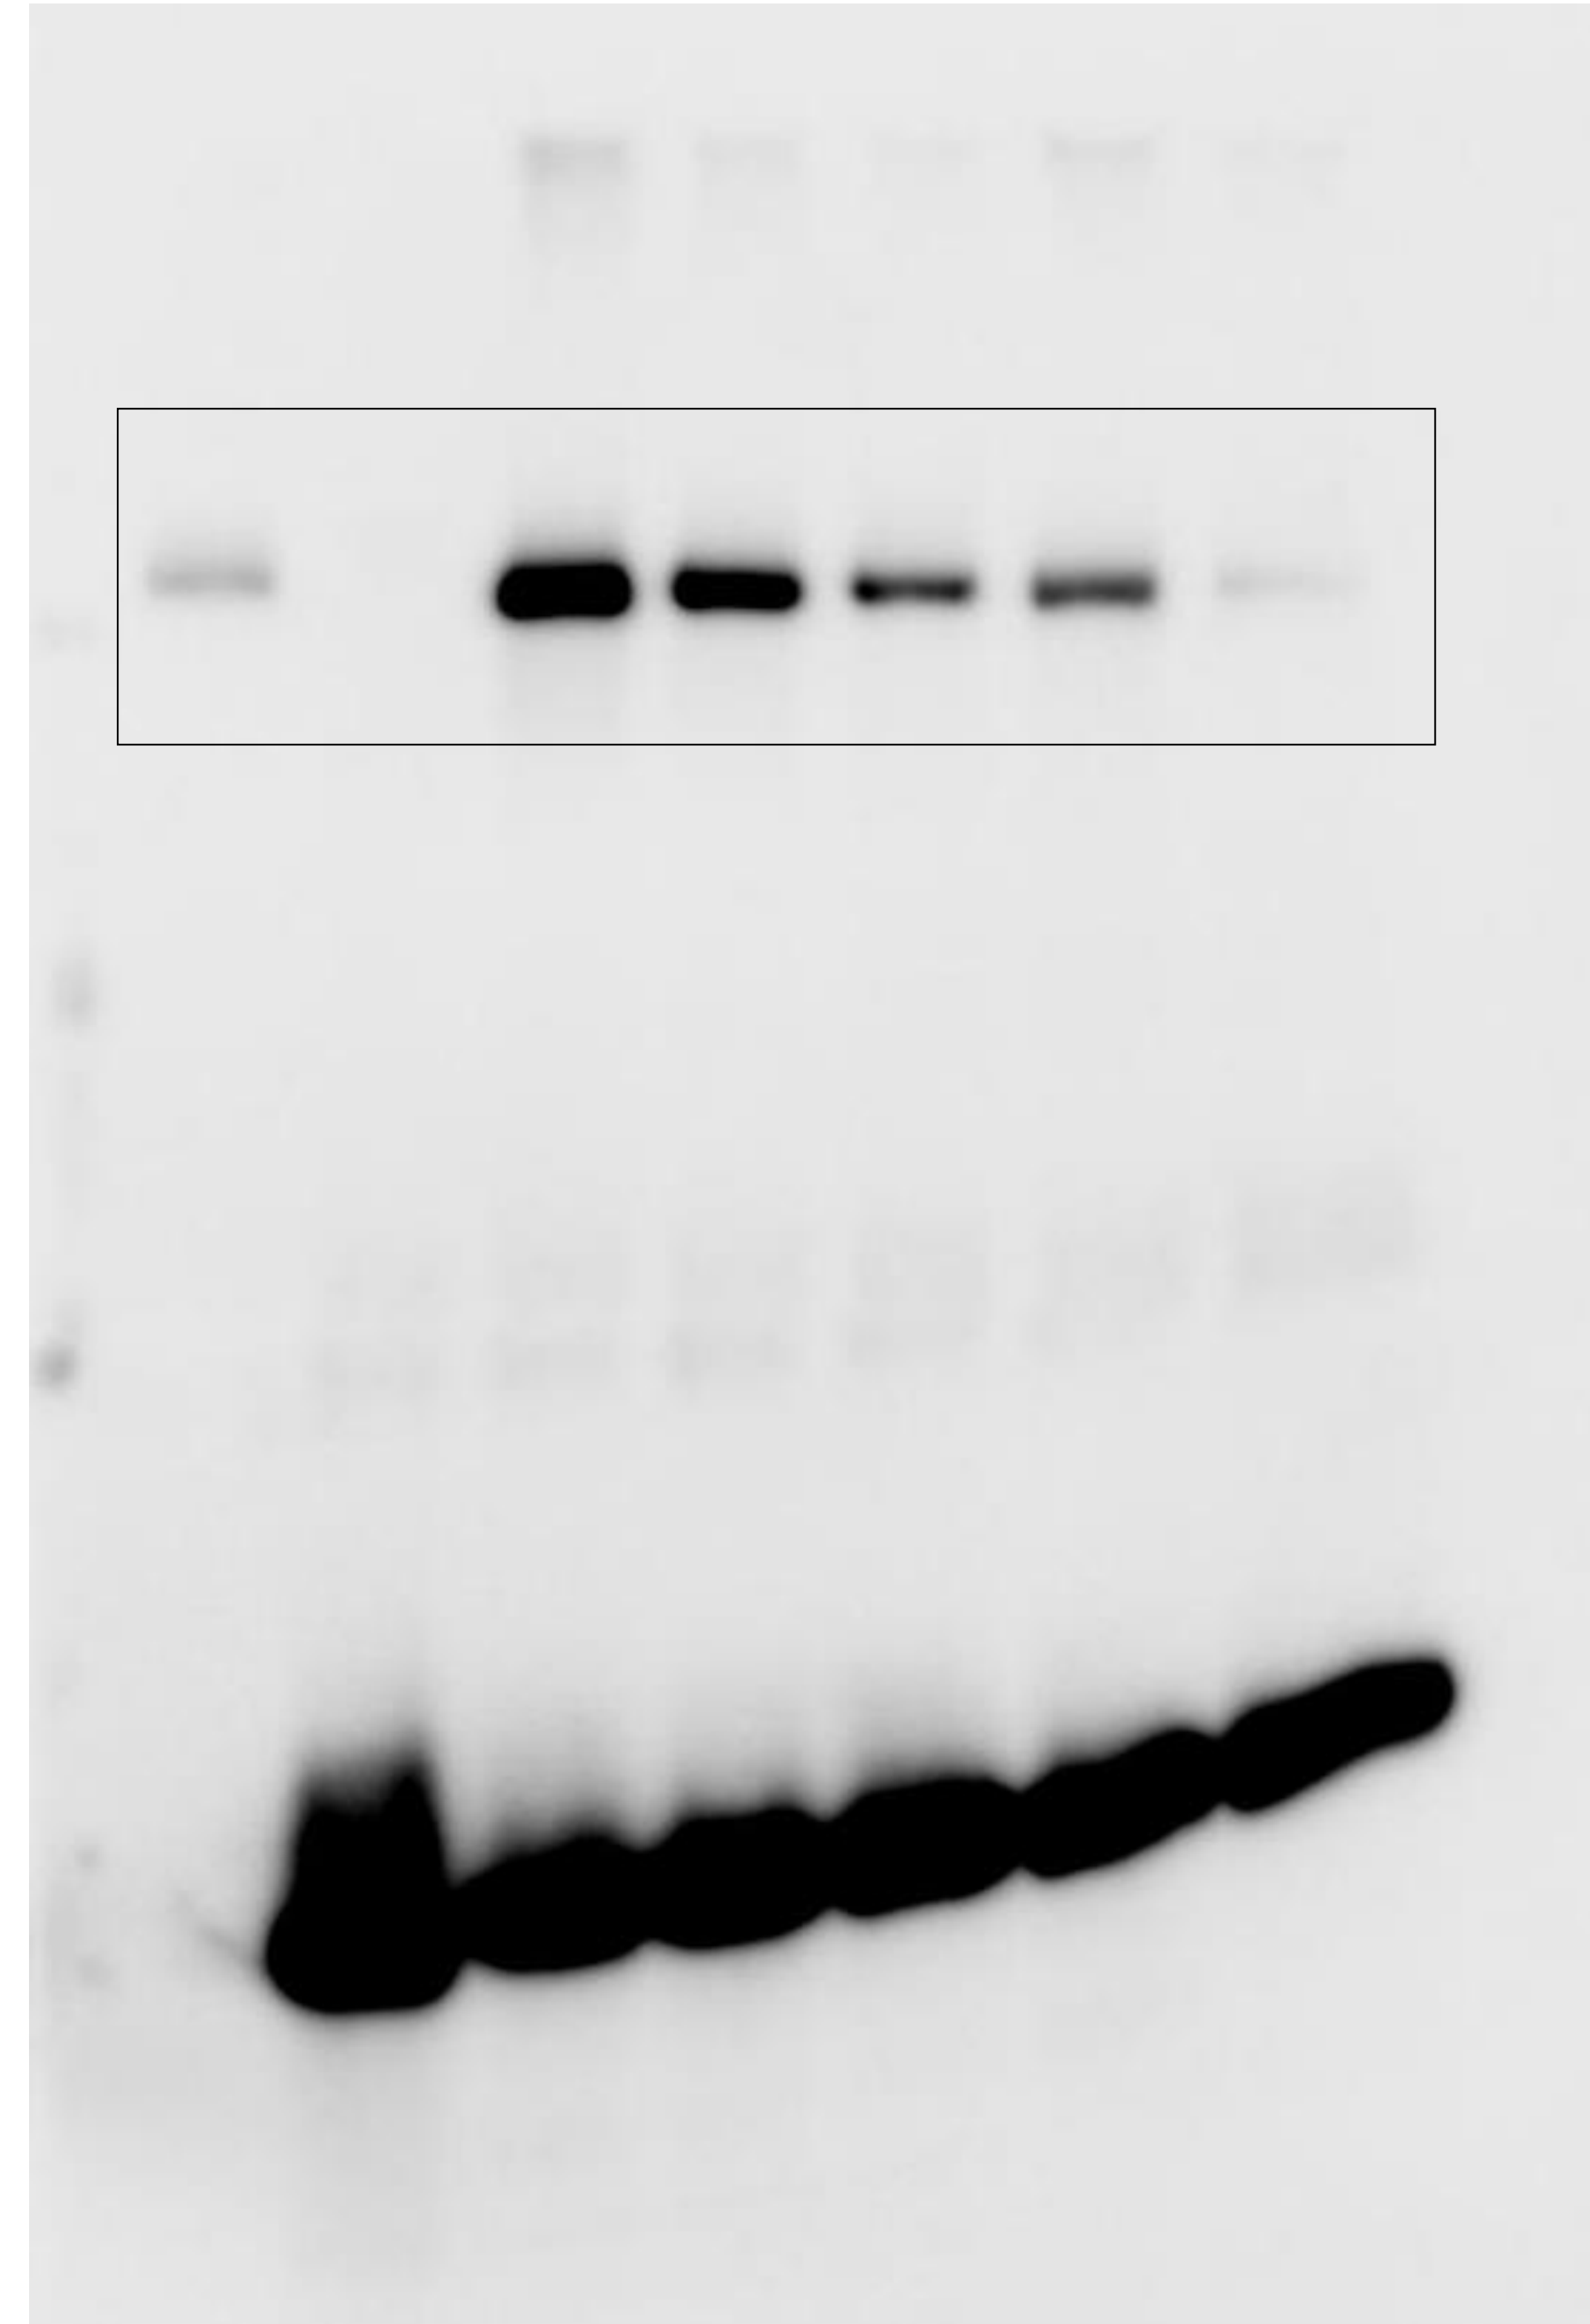

Suppl Figure 5b

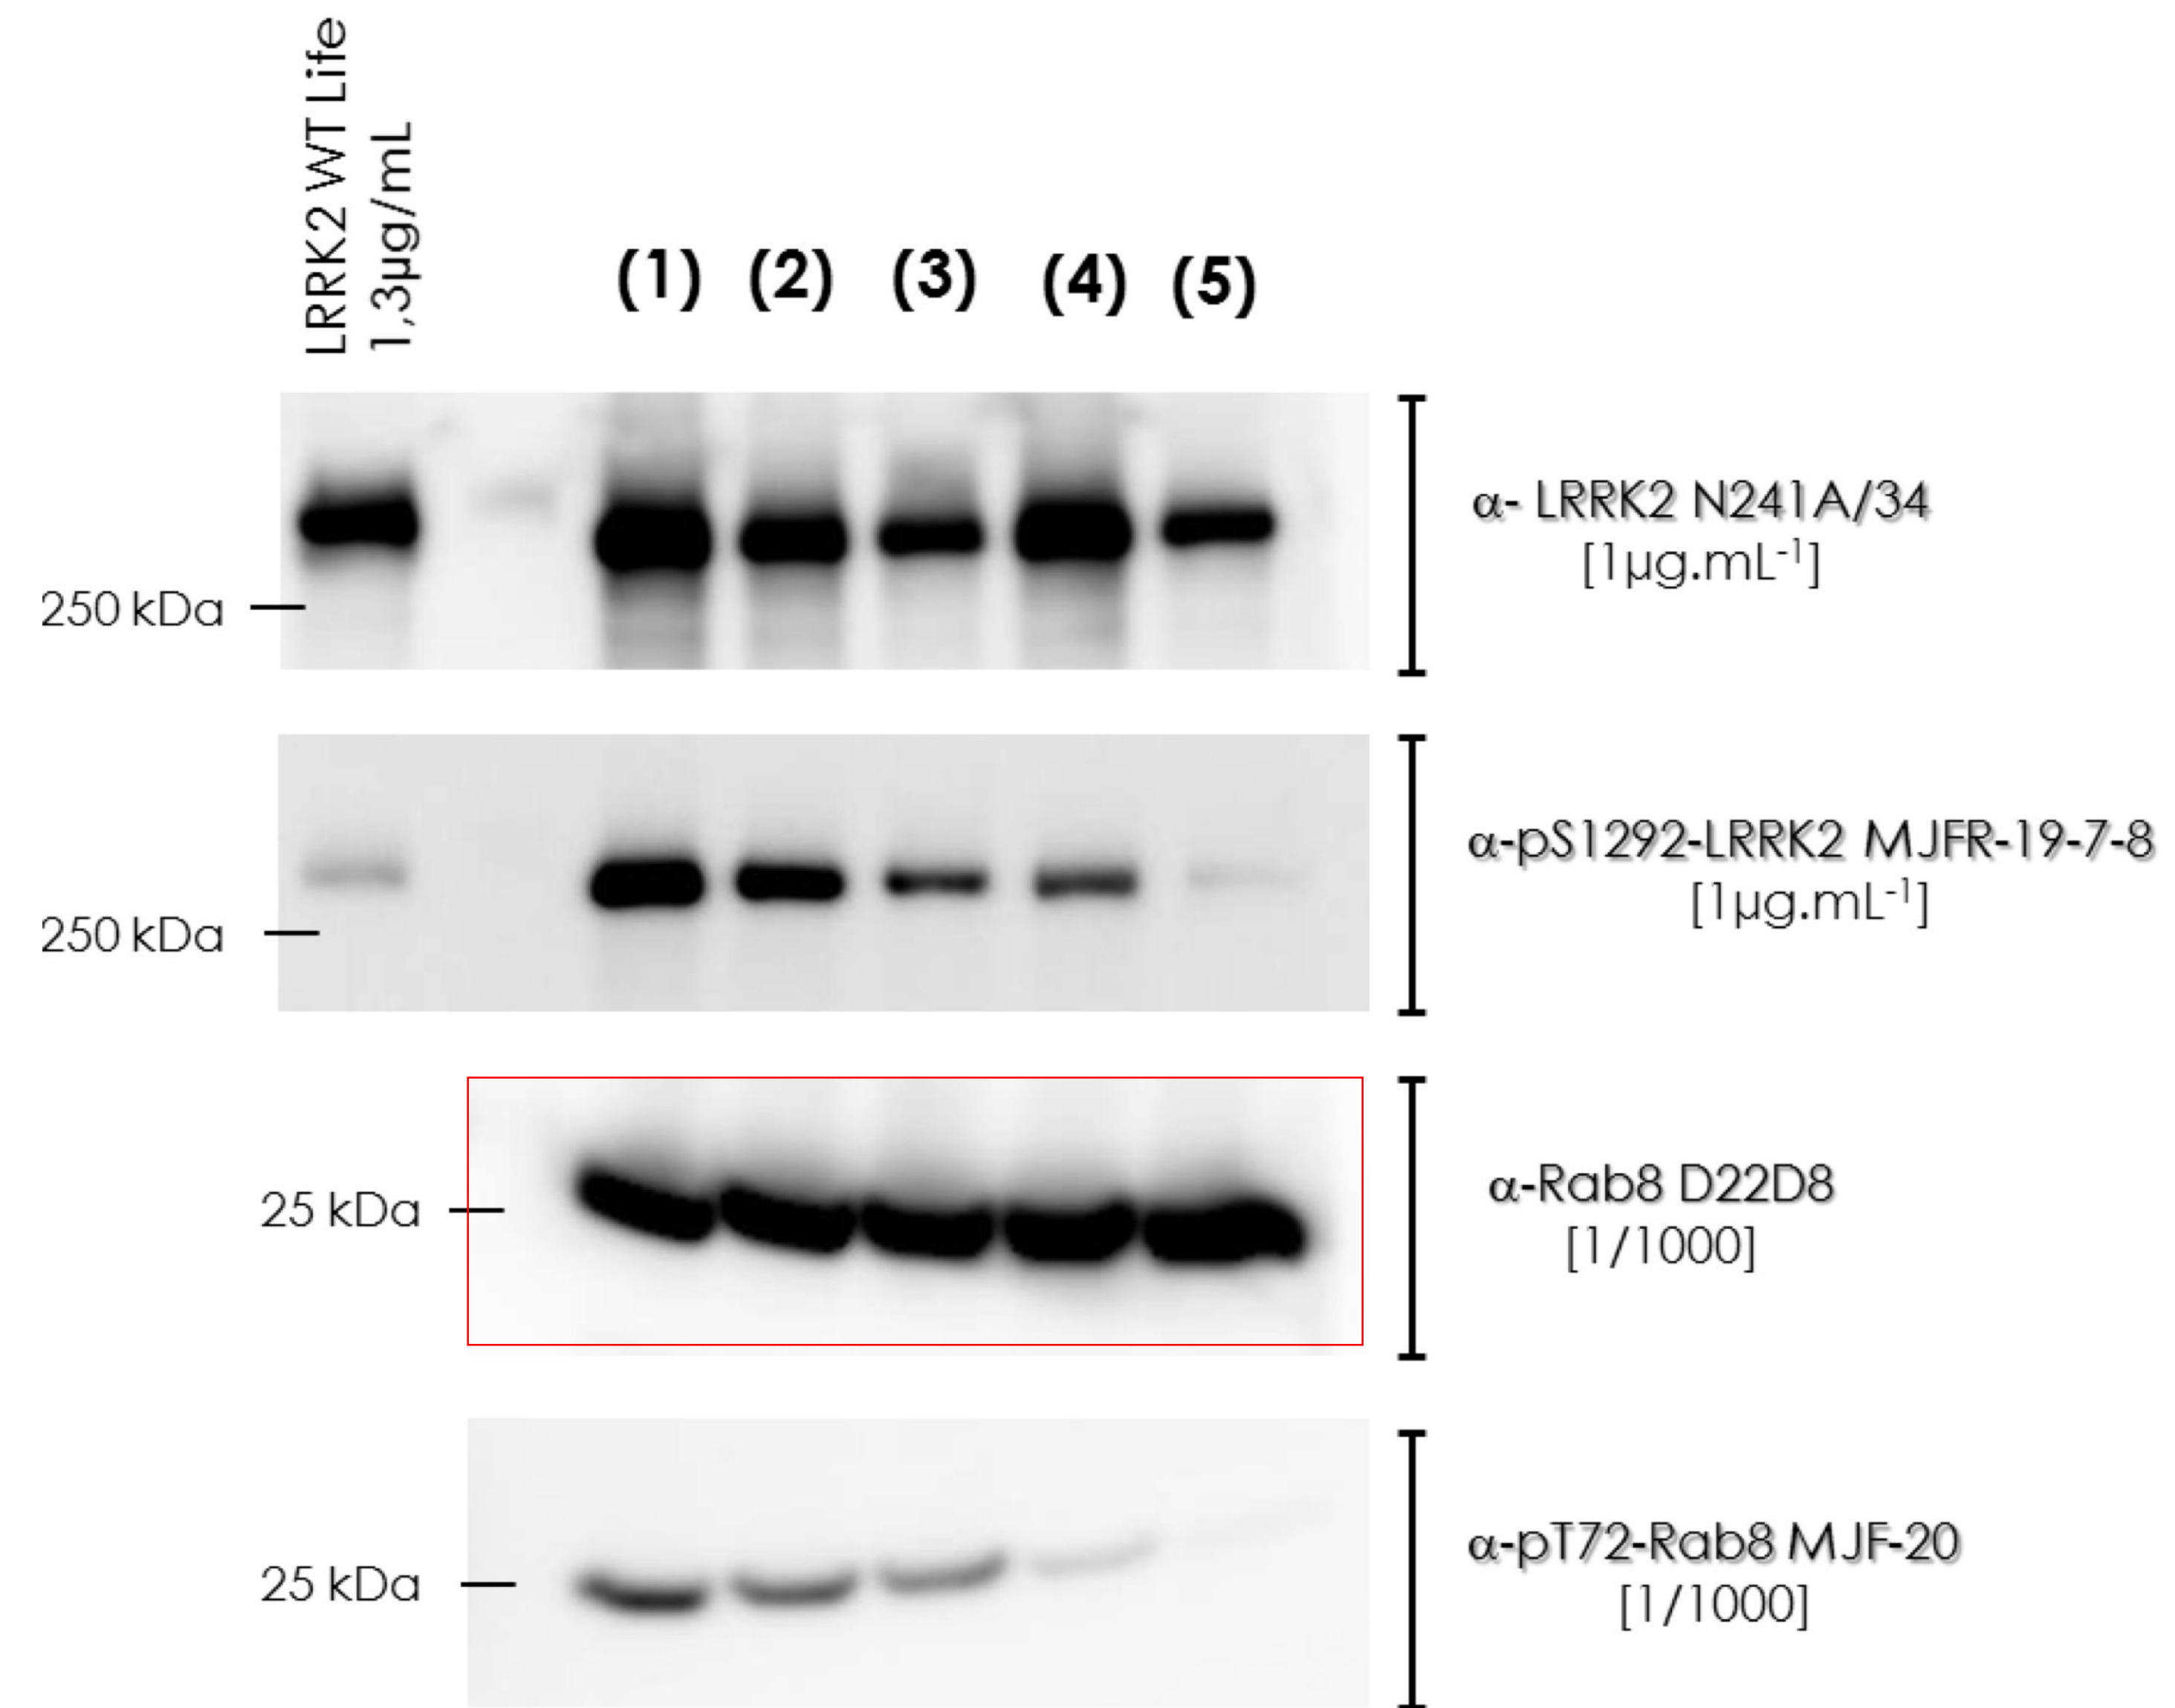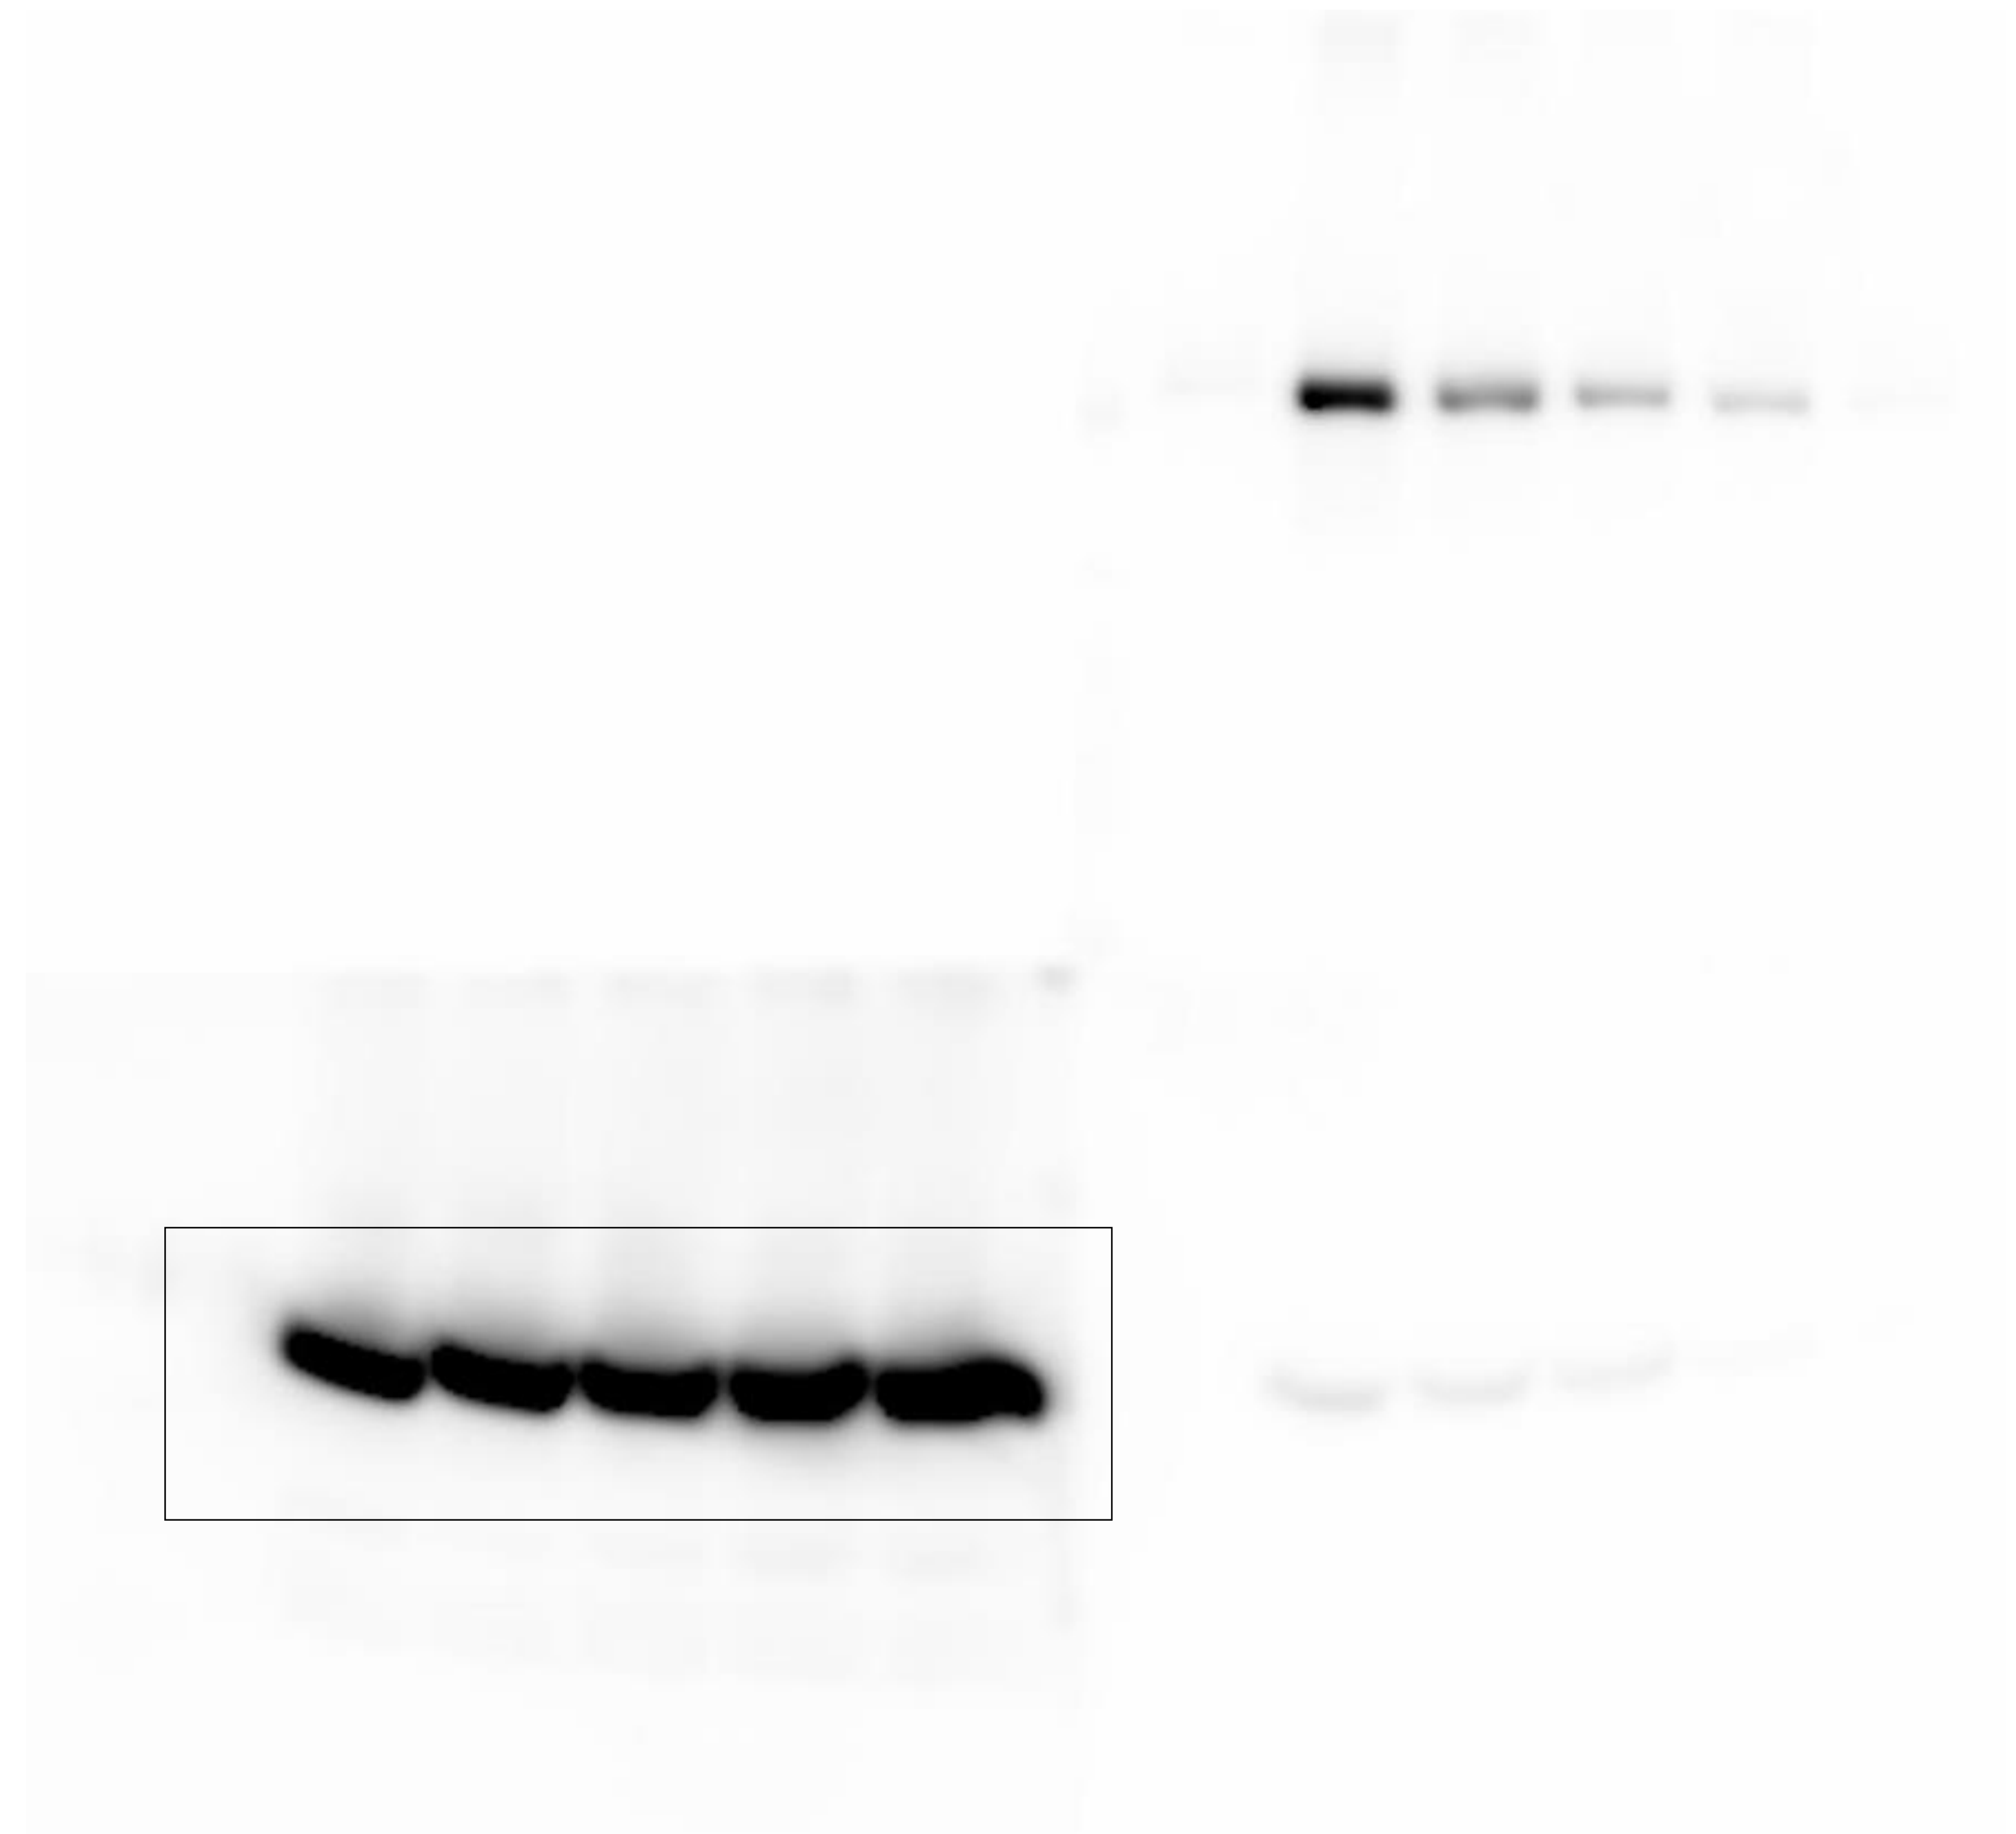

Suppl Figure 5b

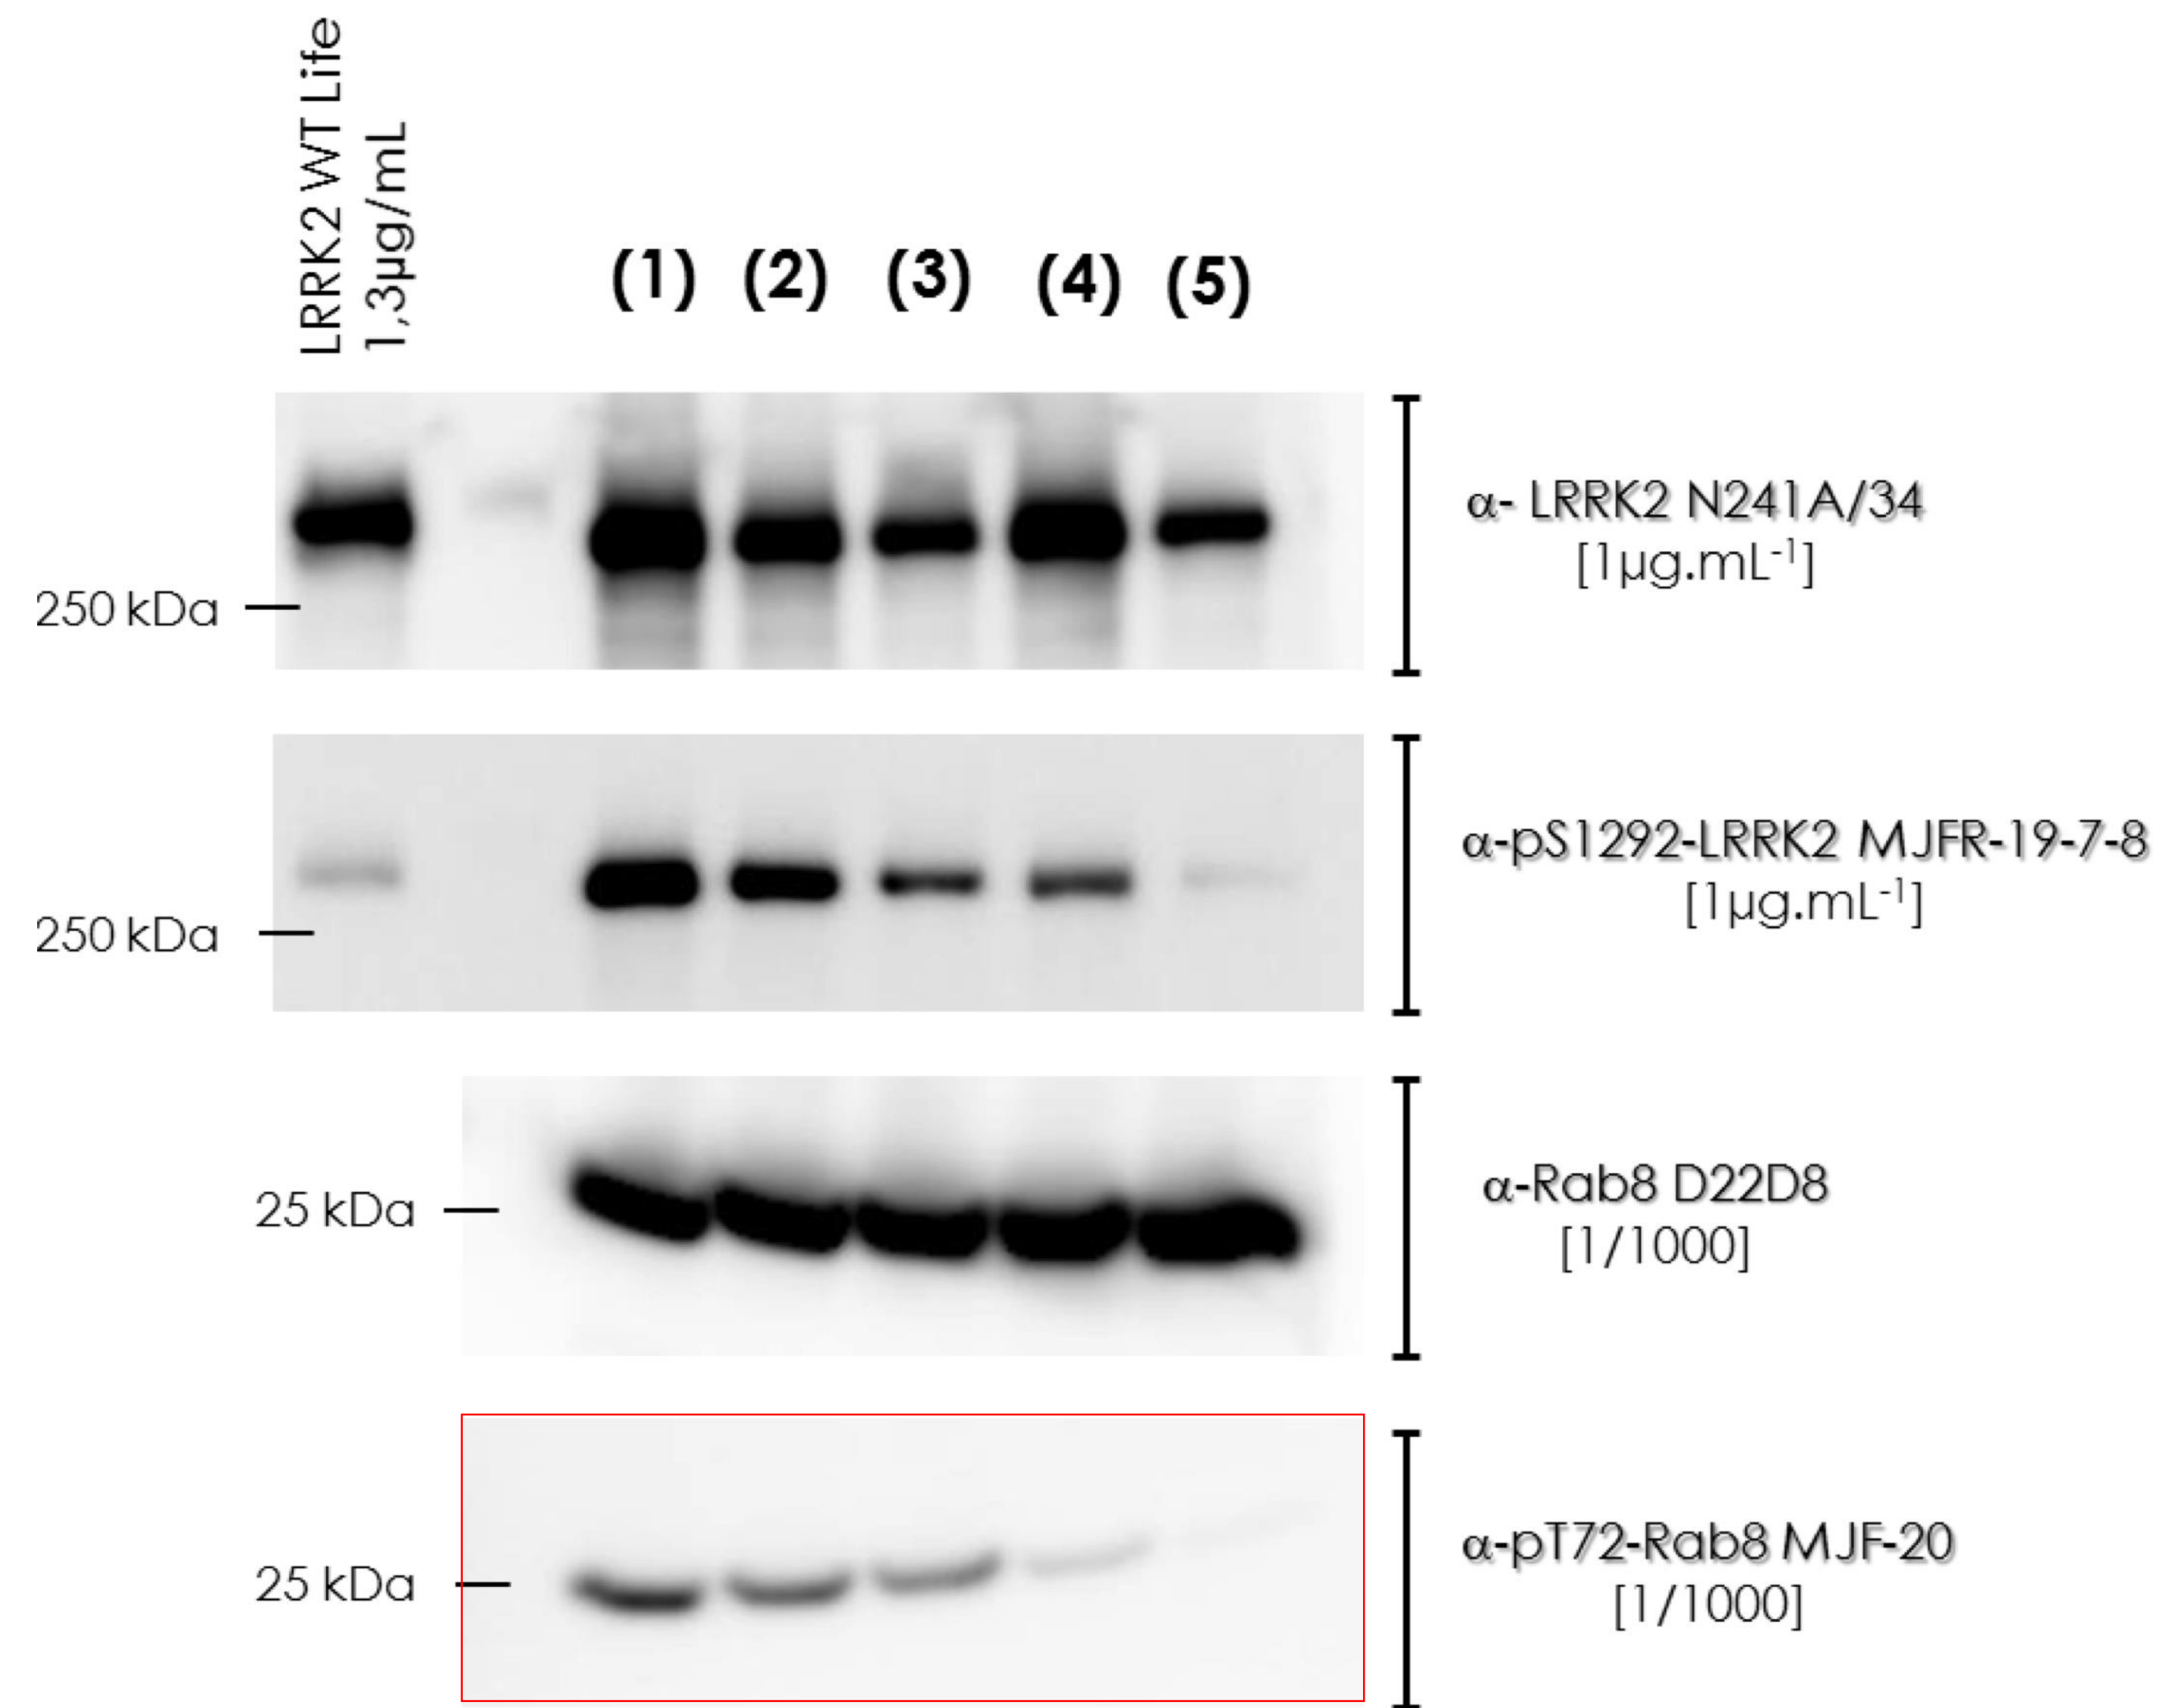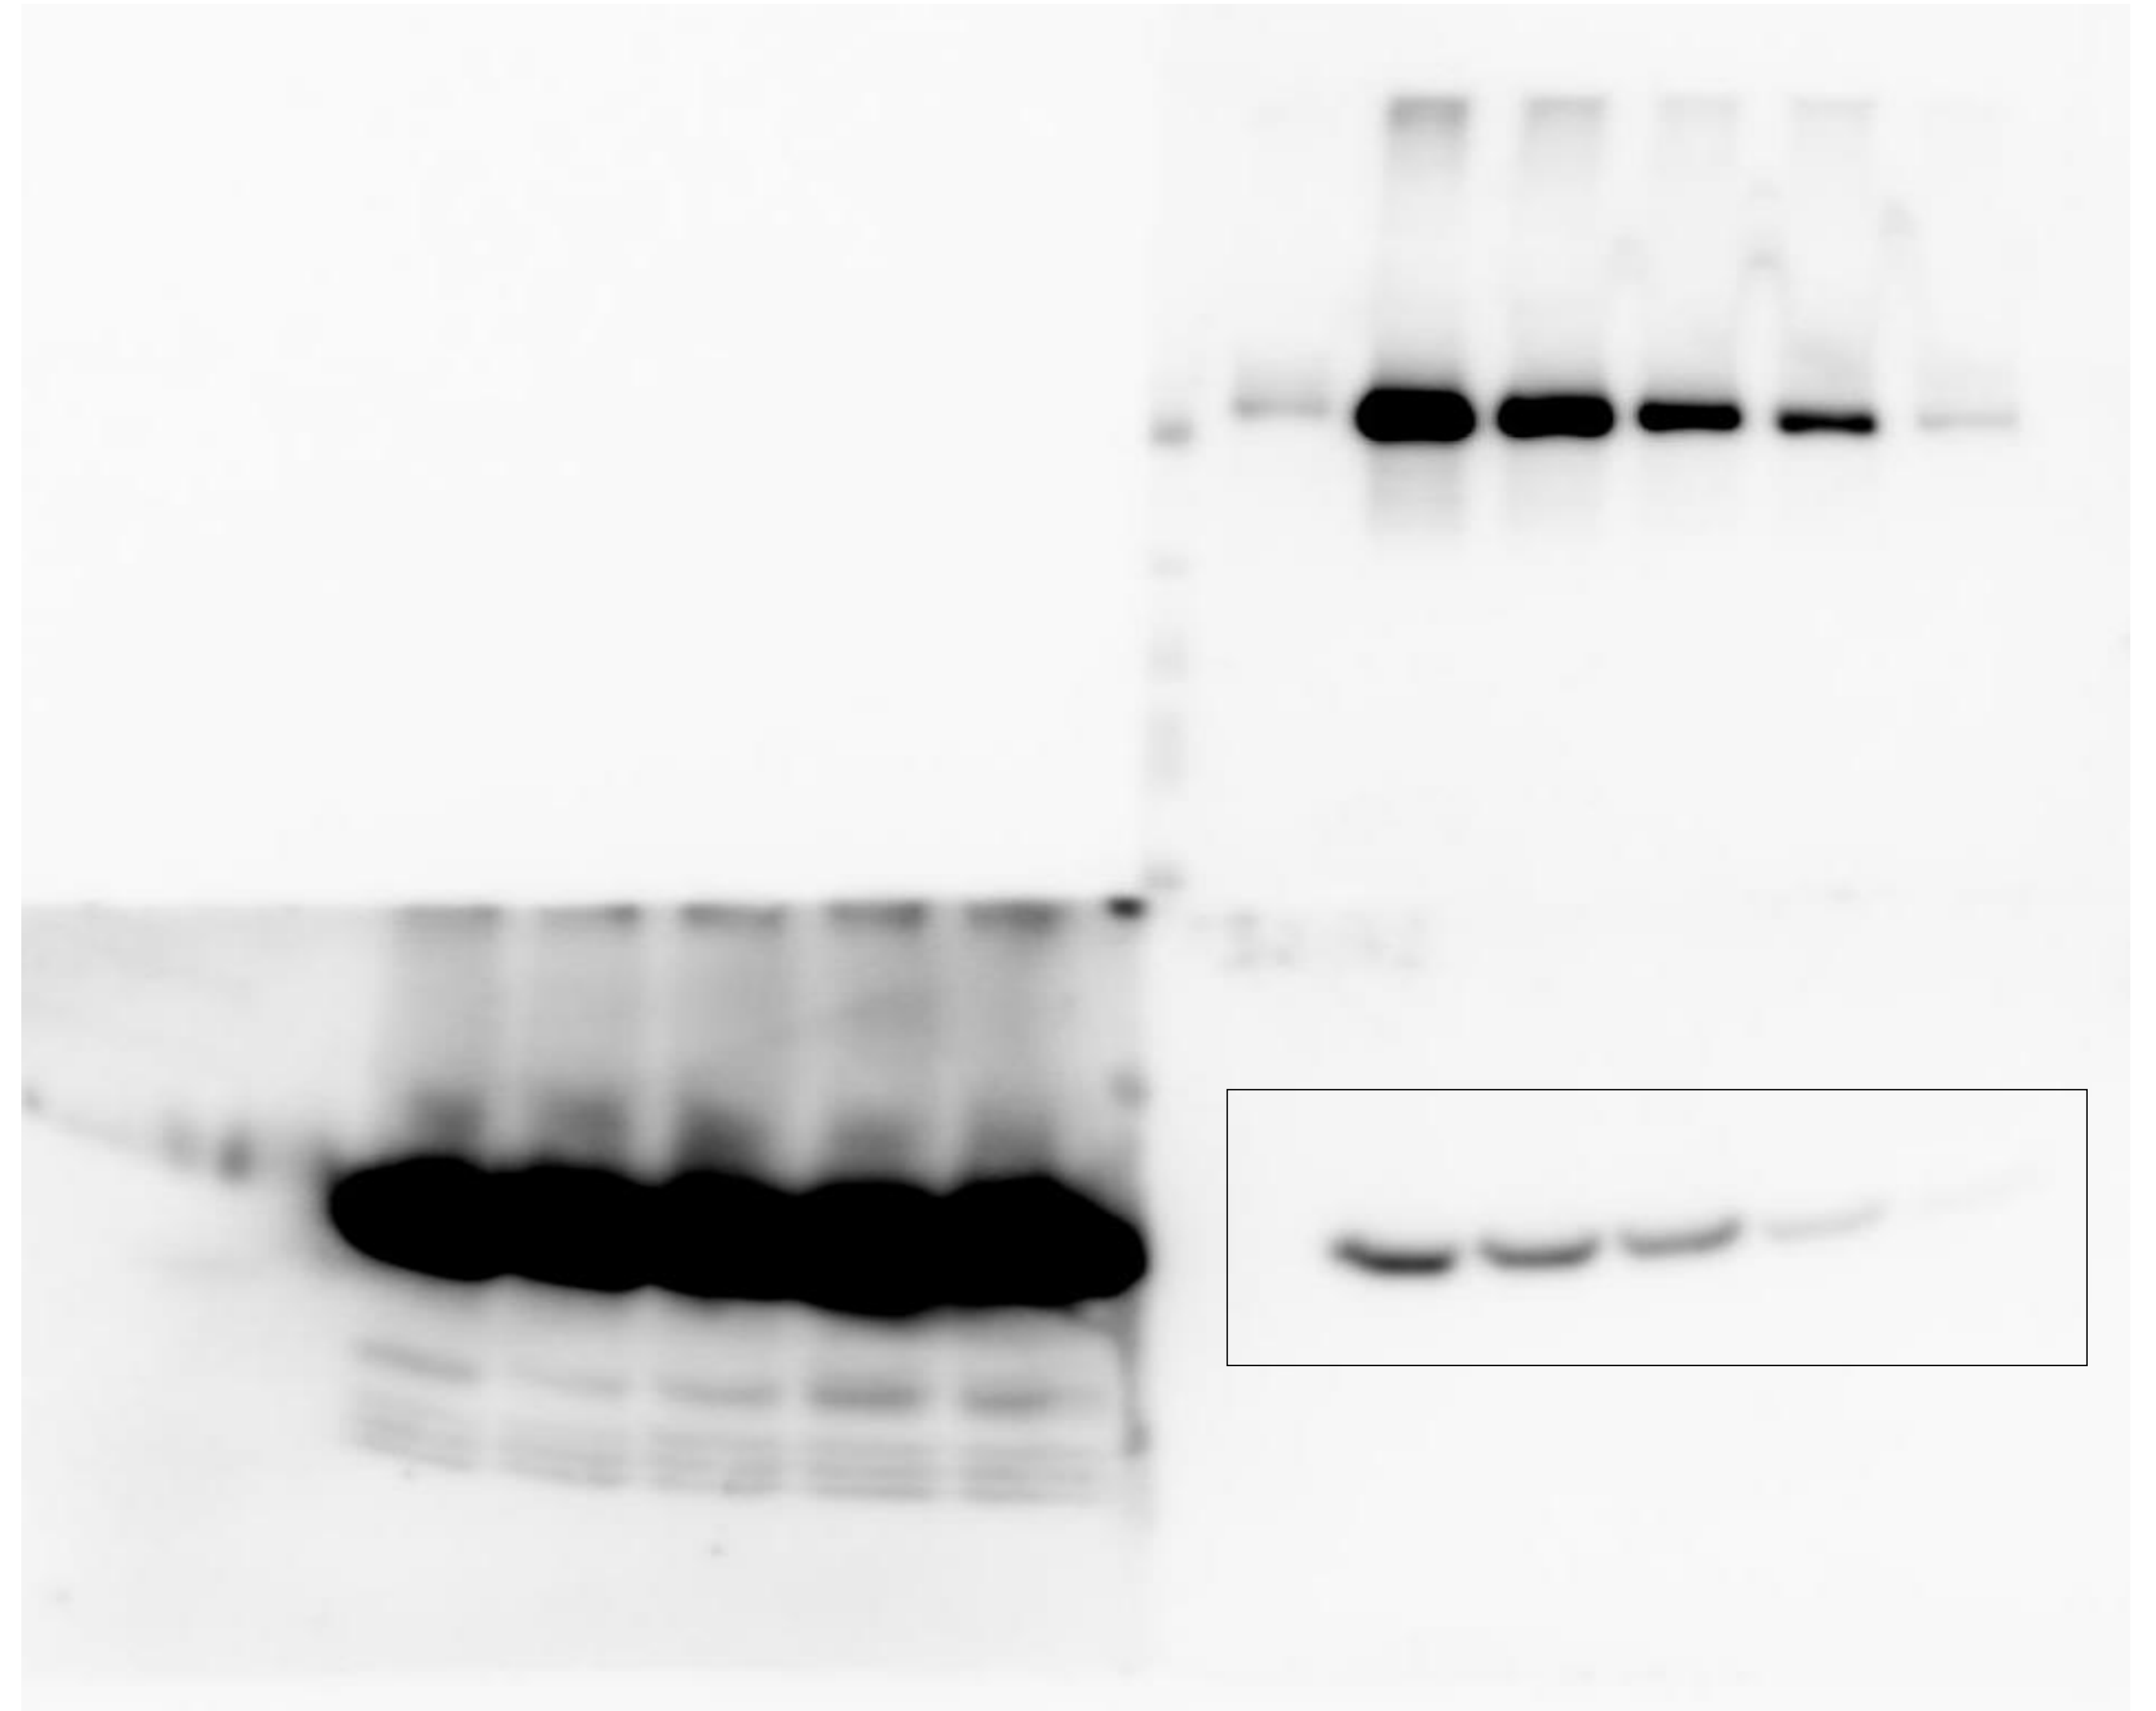

Suppl Figure S6

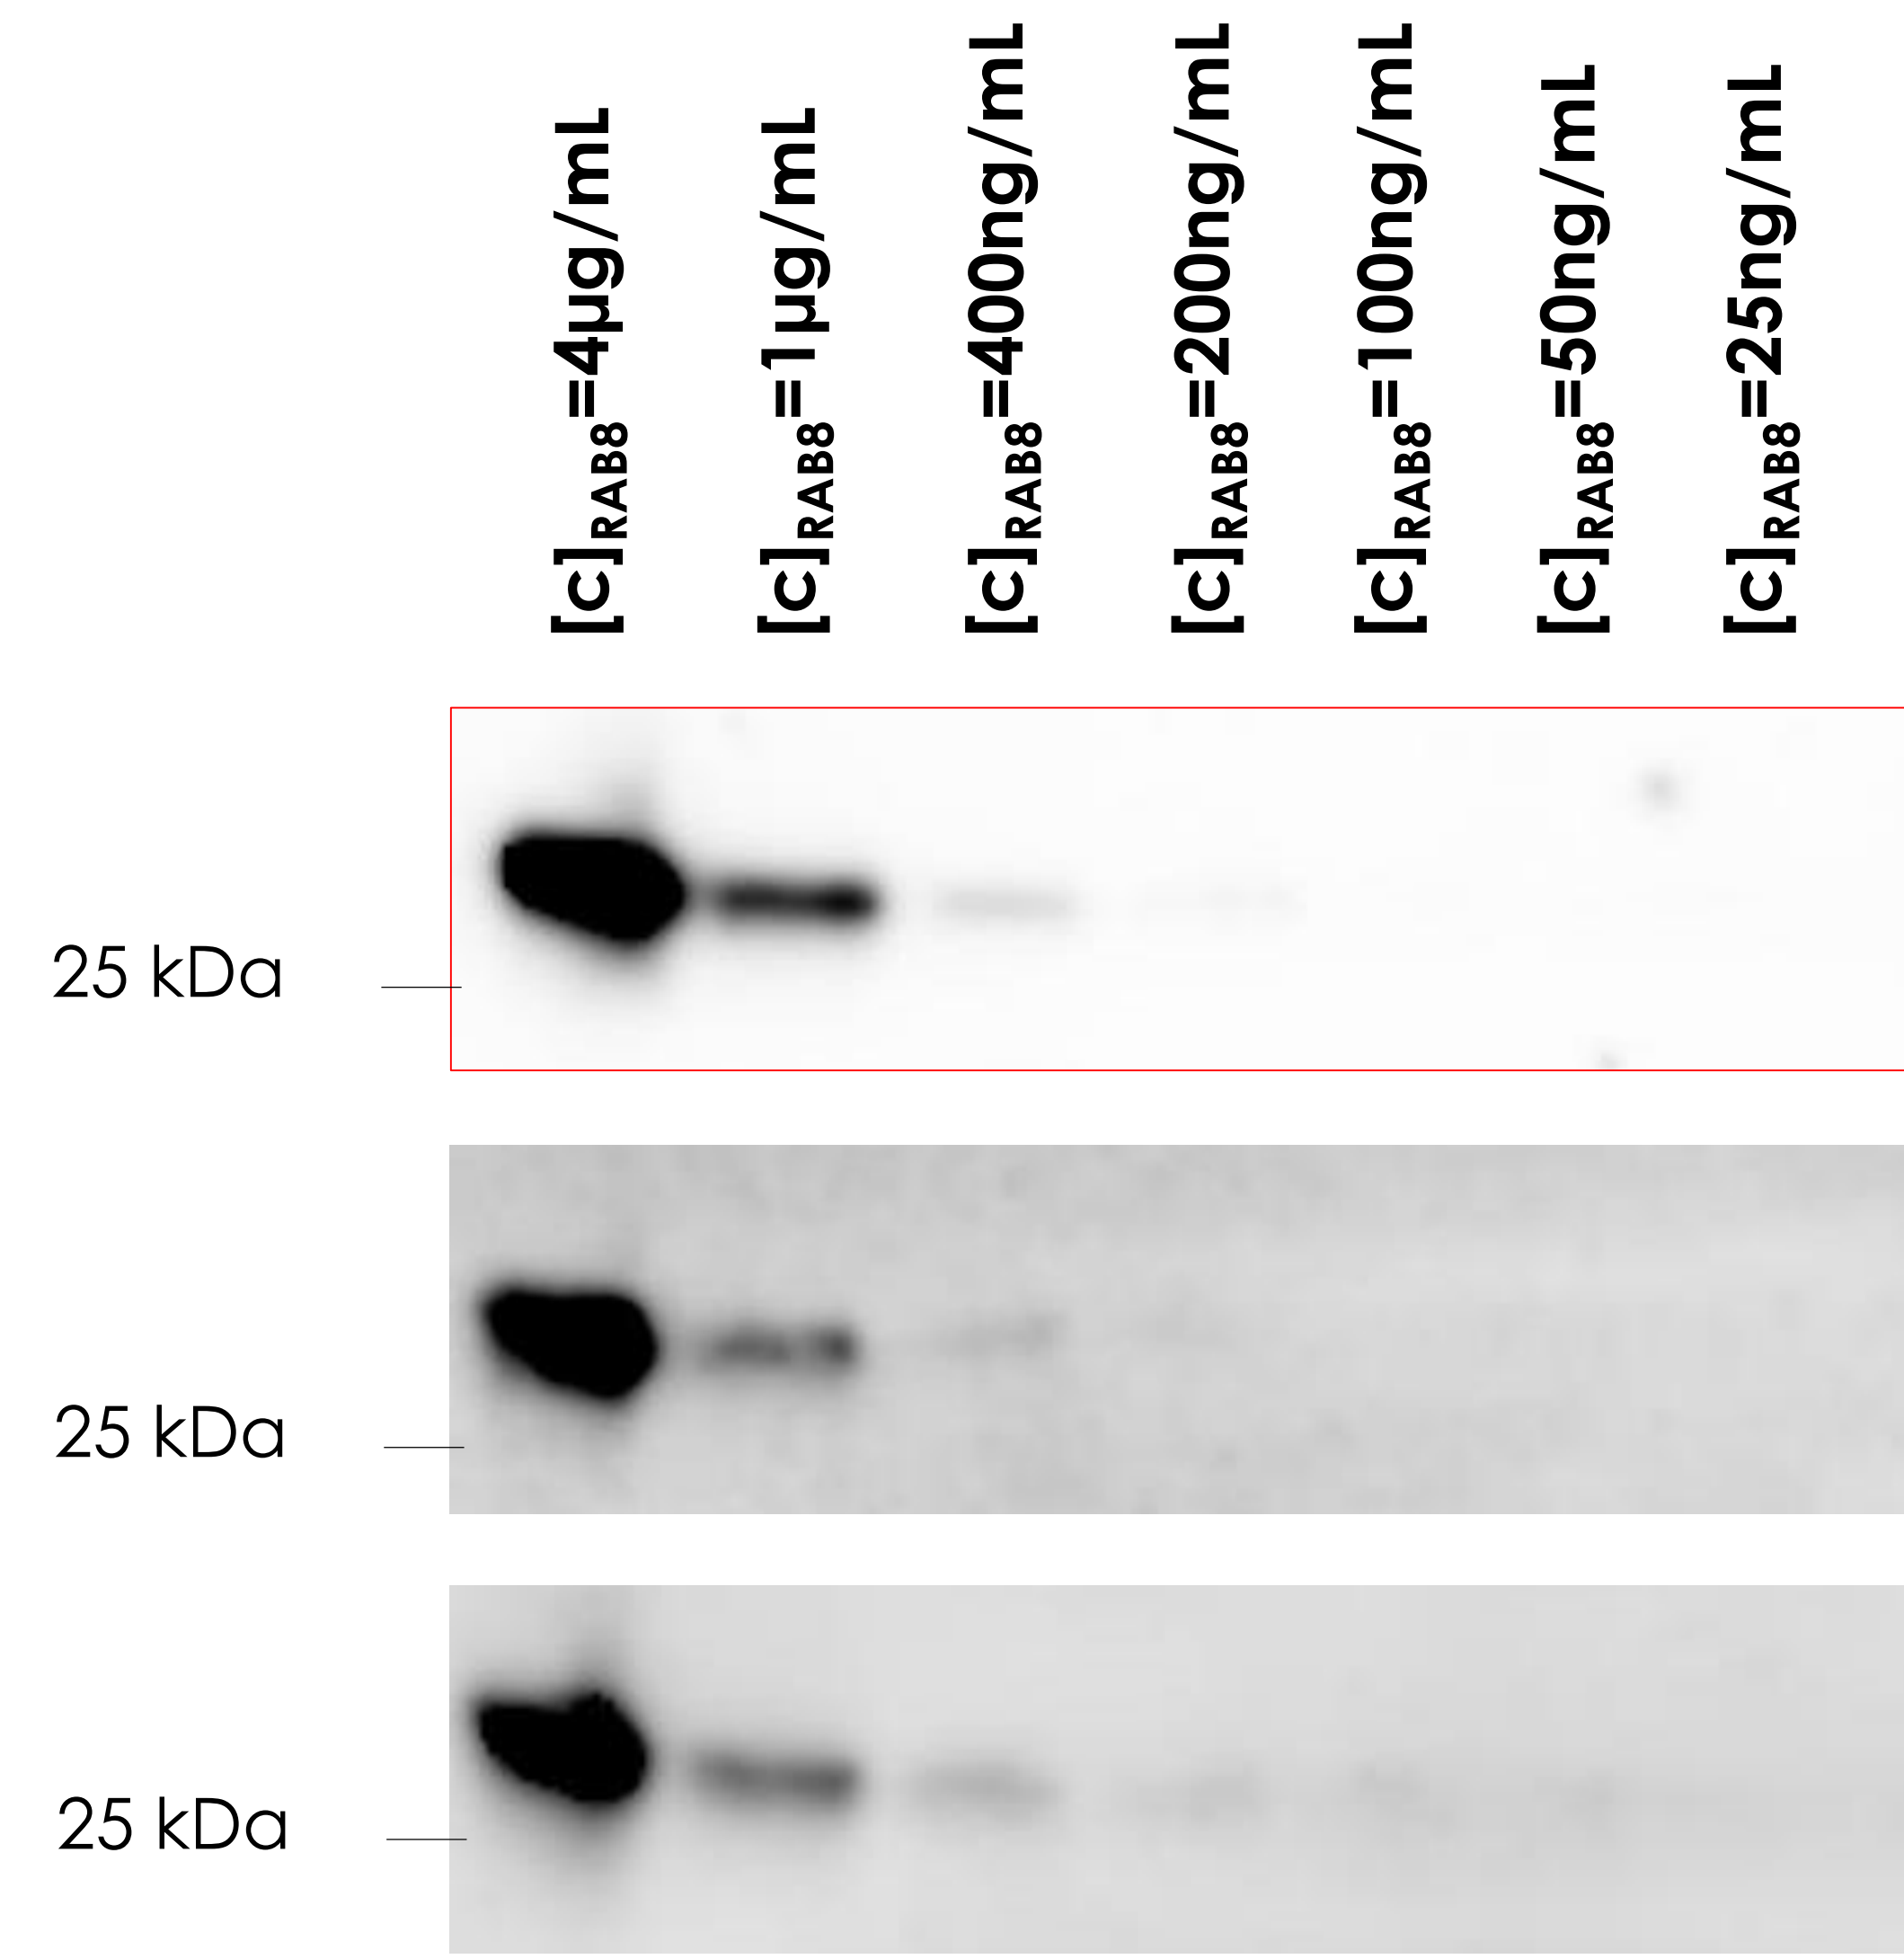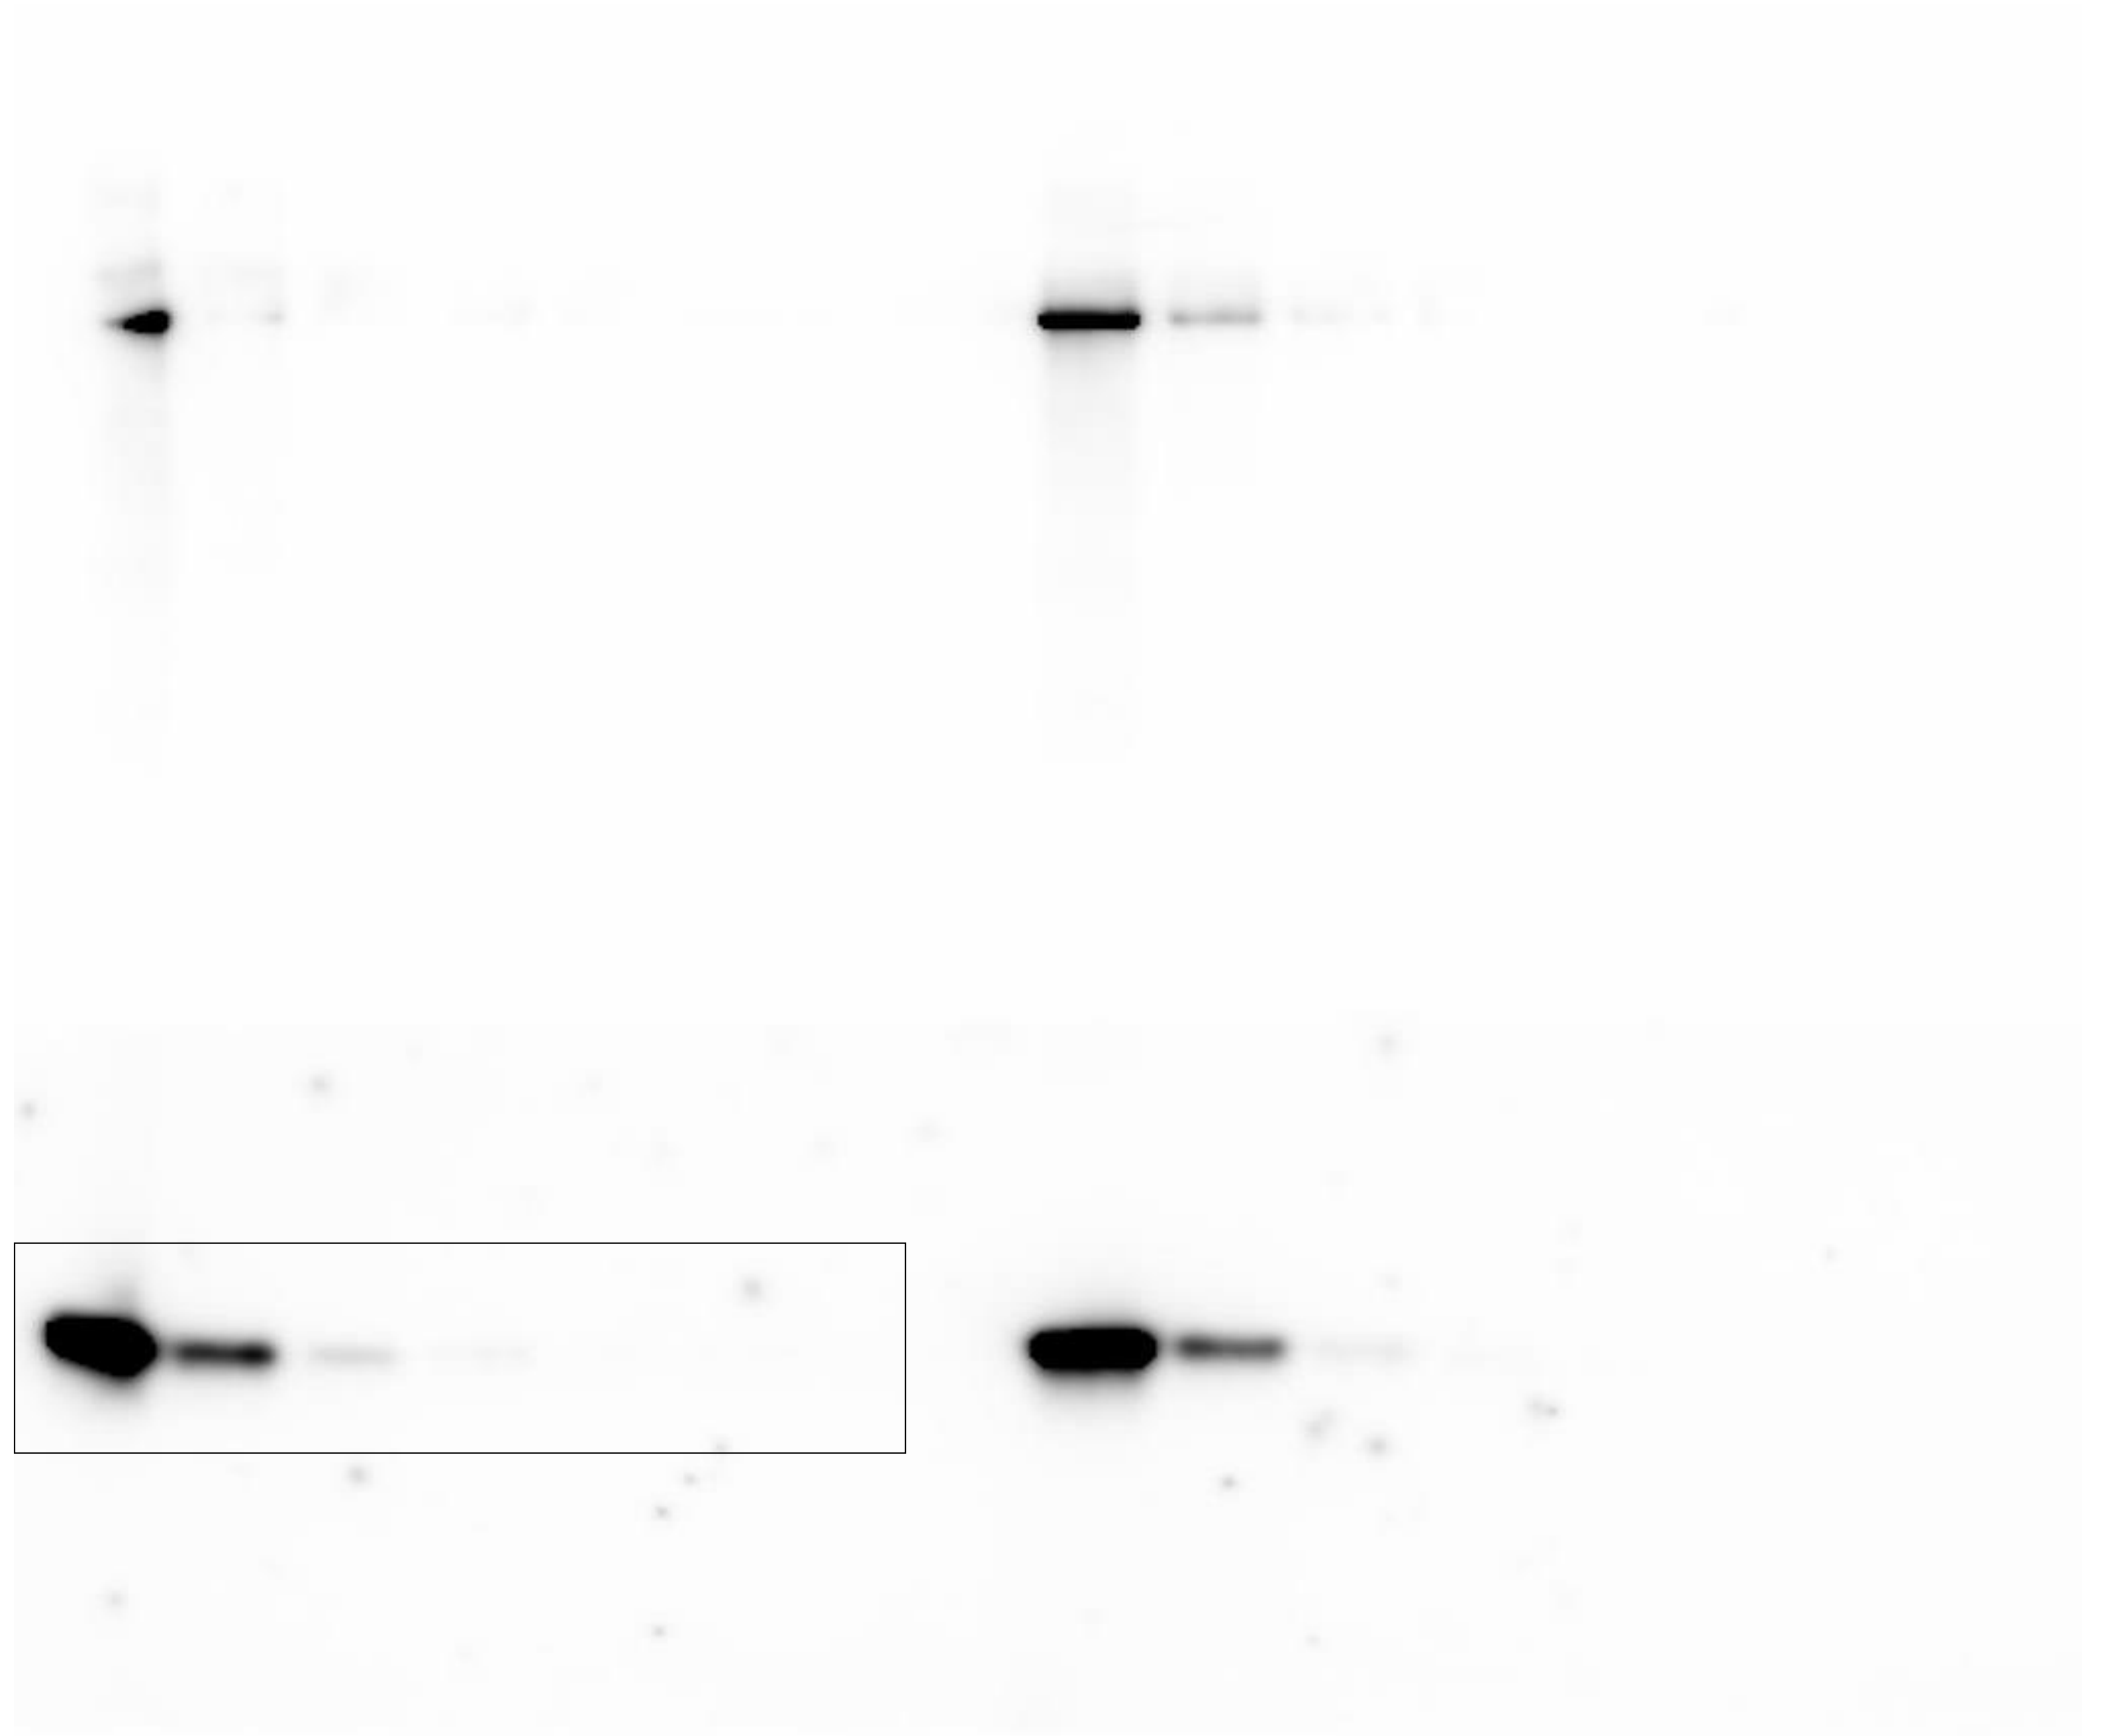

Suppl Figure S6

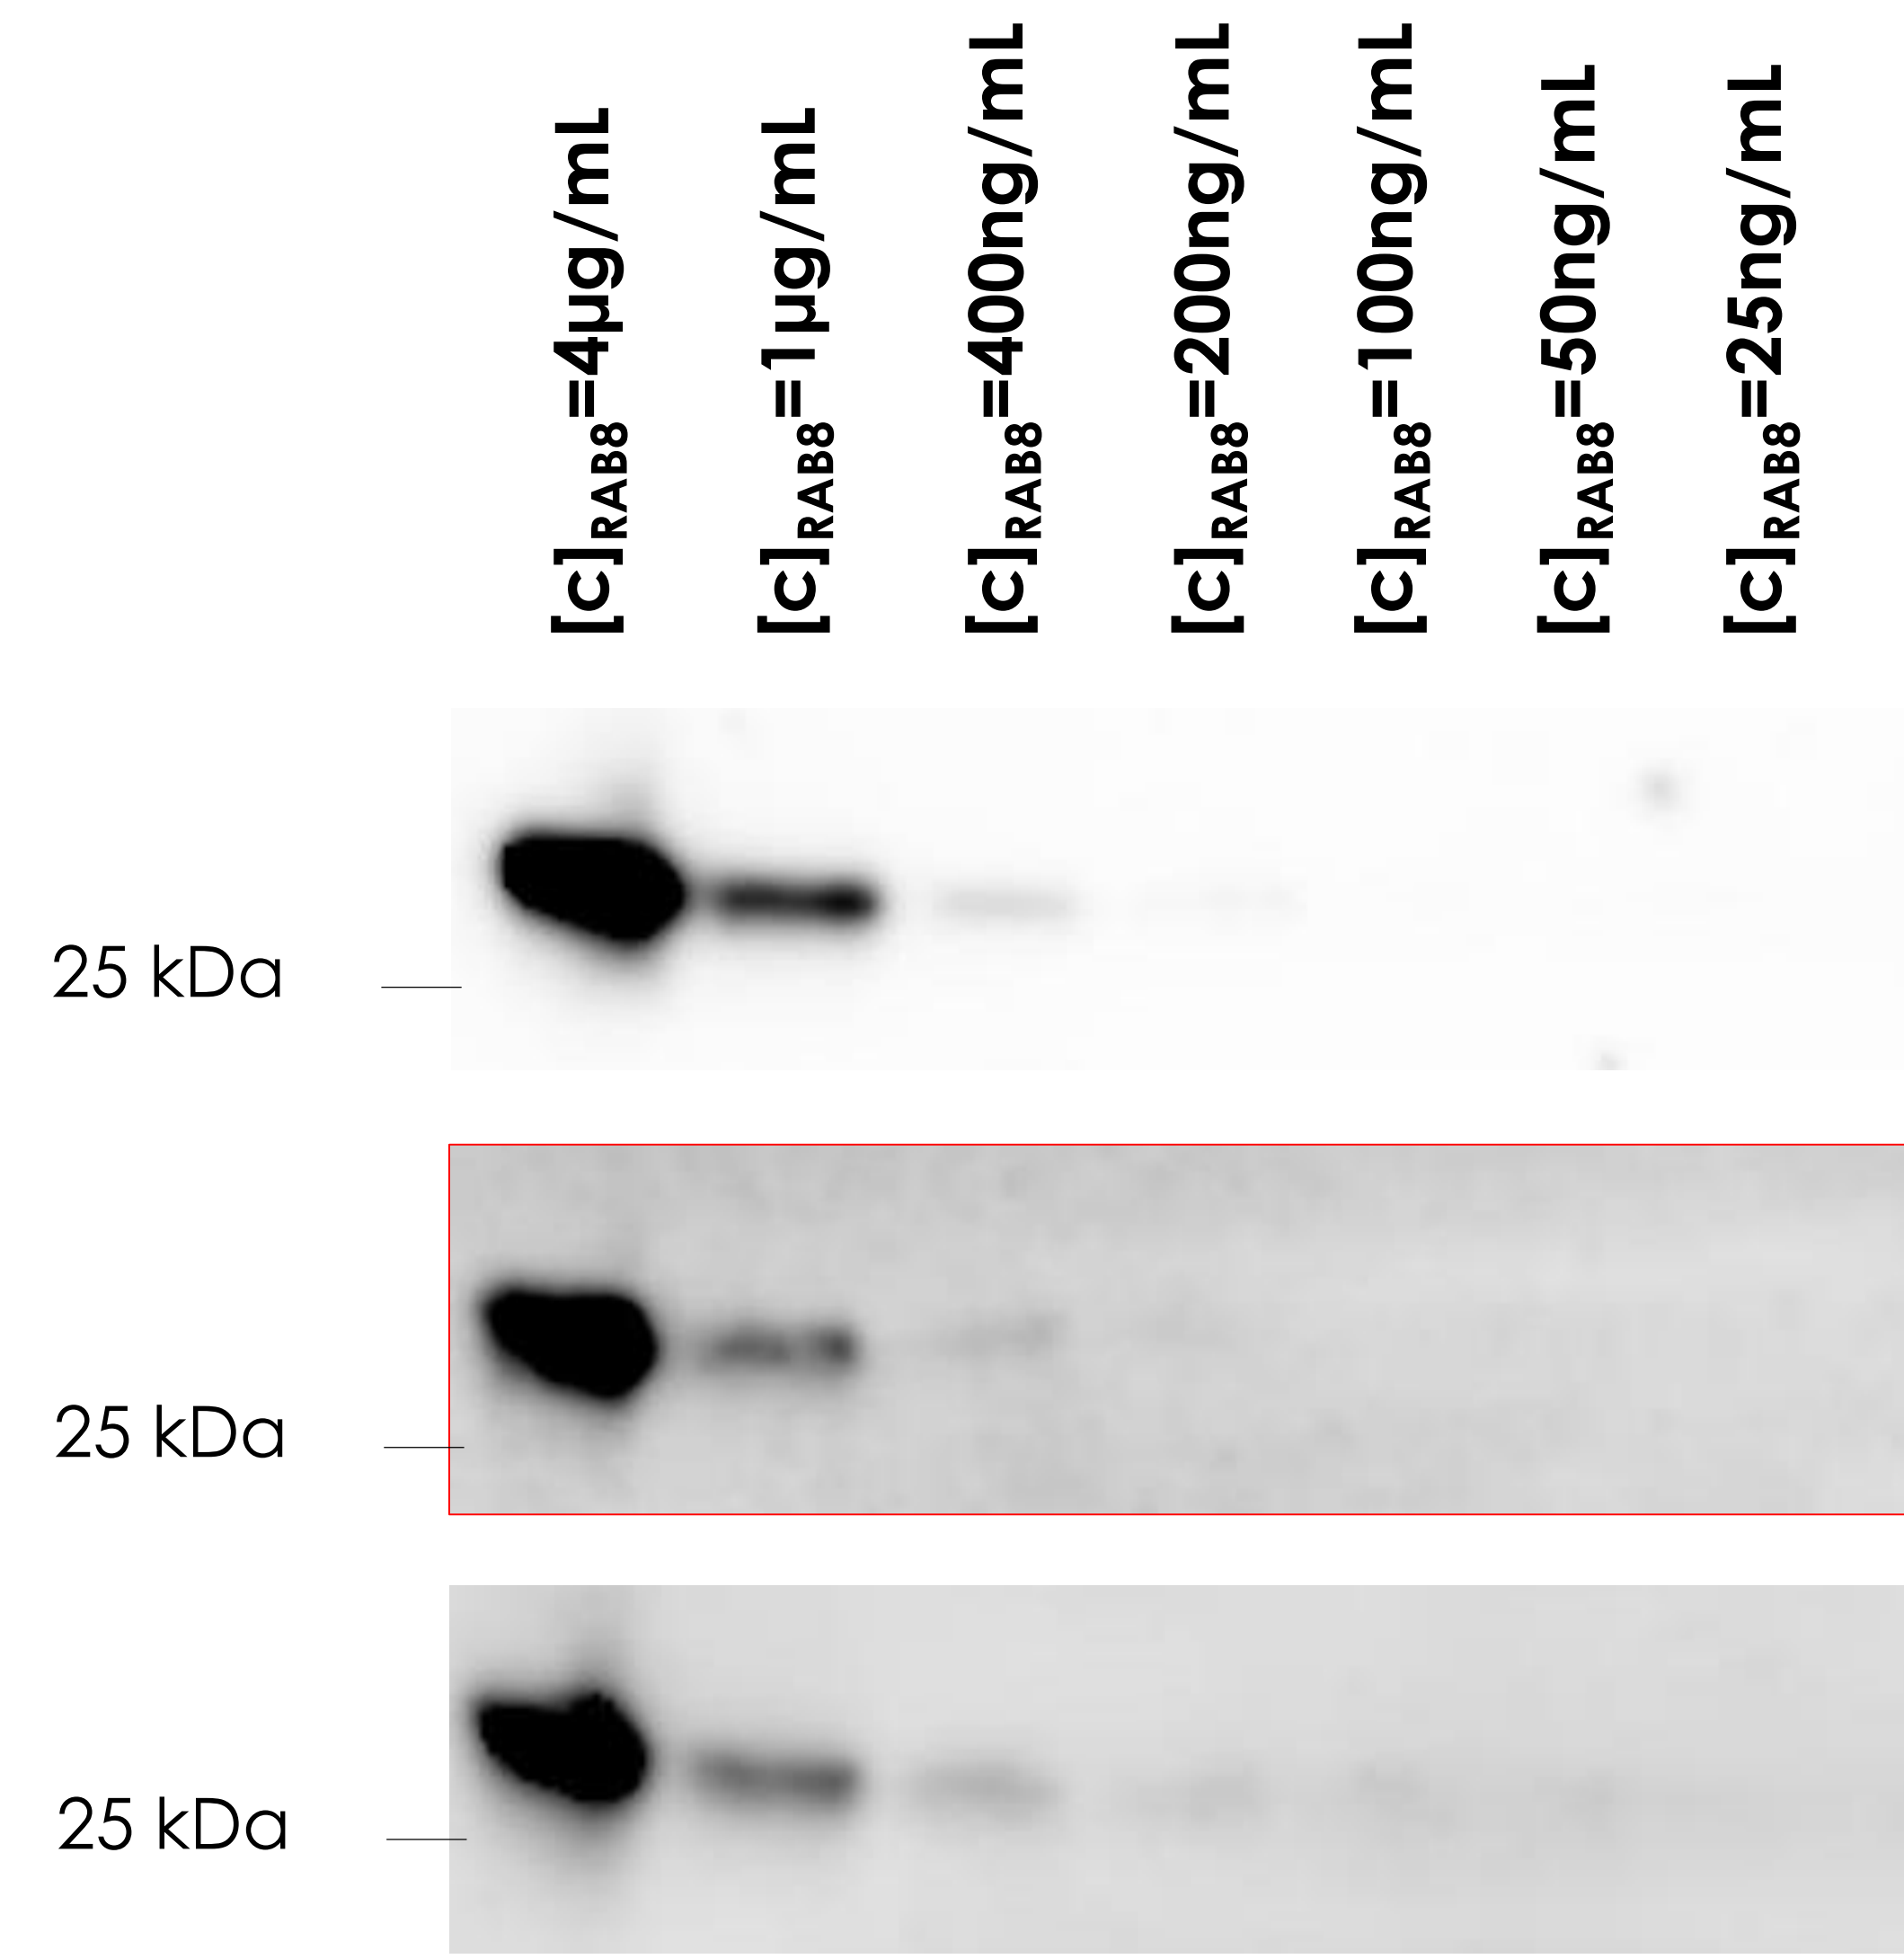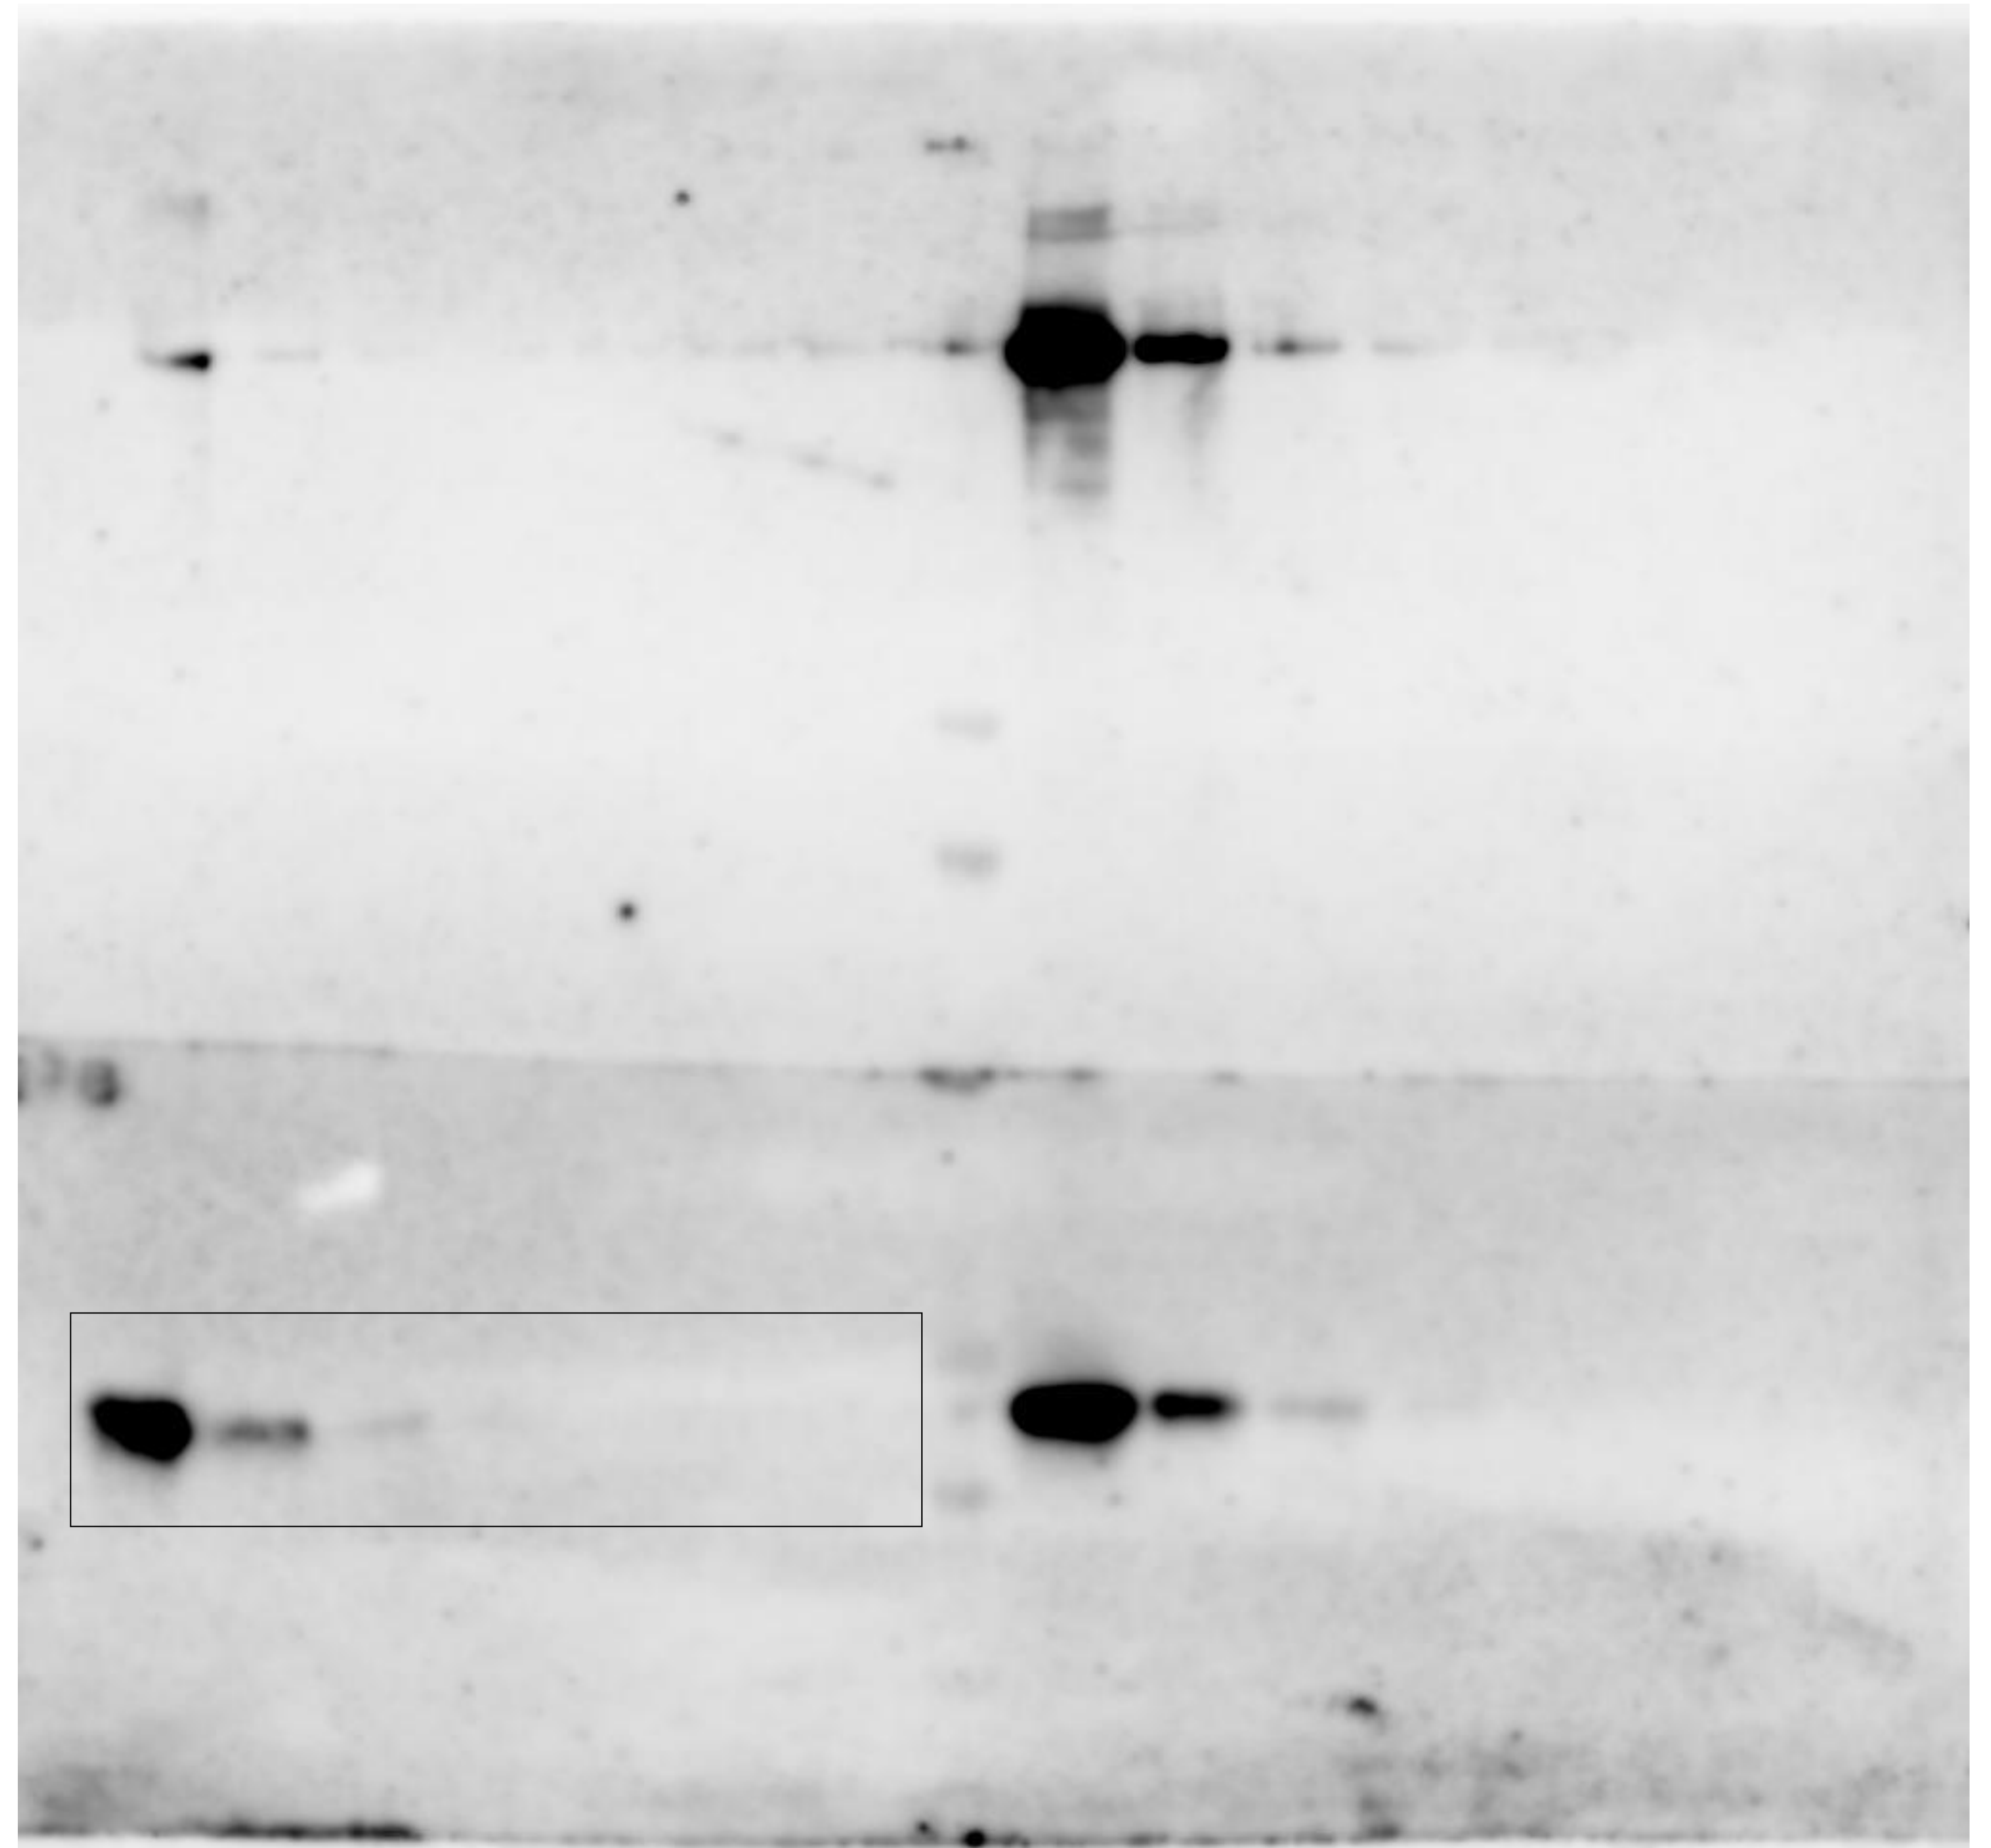

Suppl Figure S6

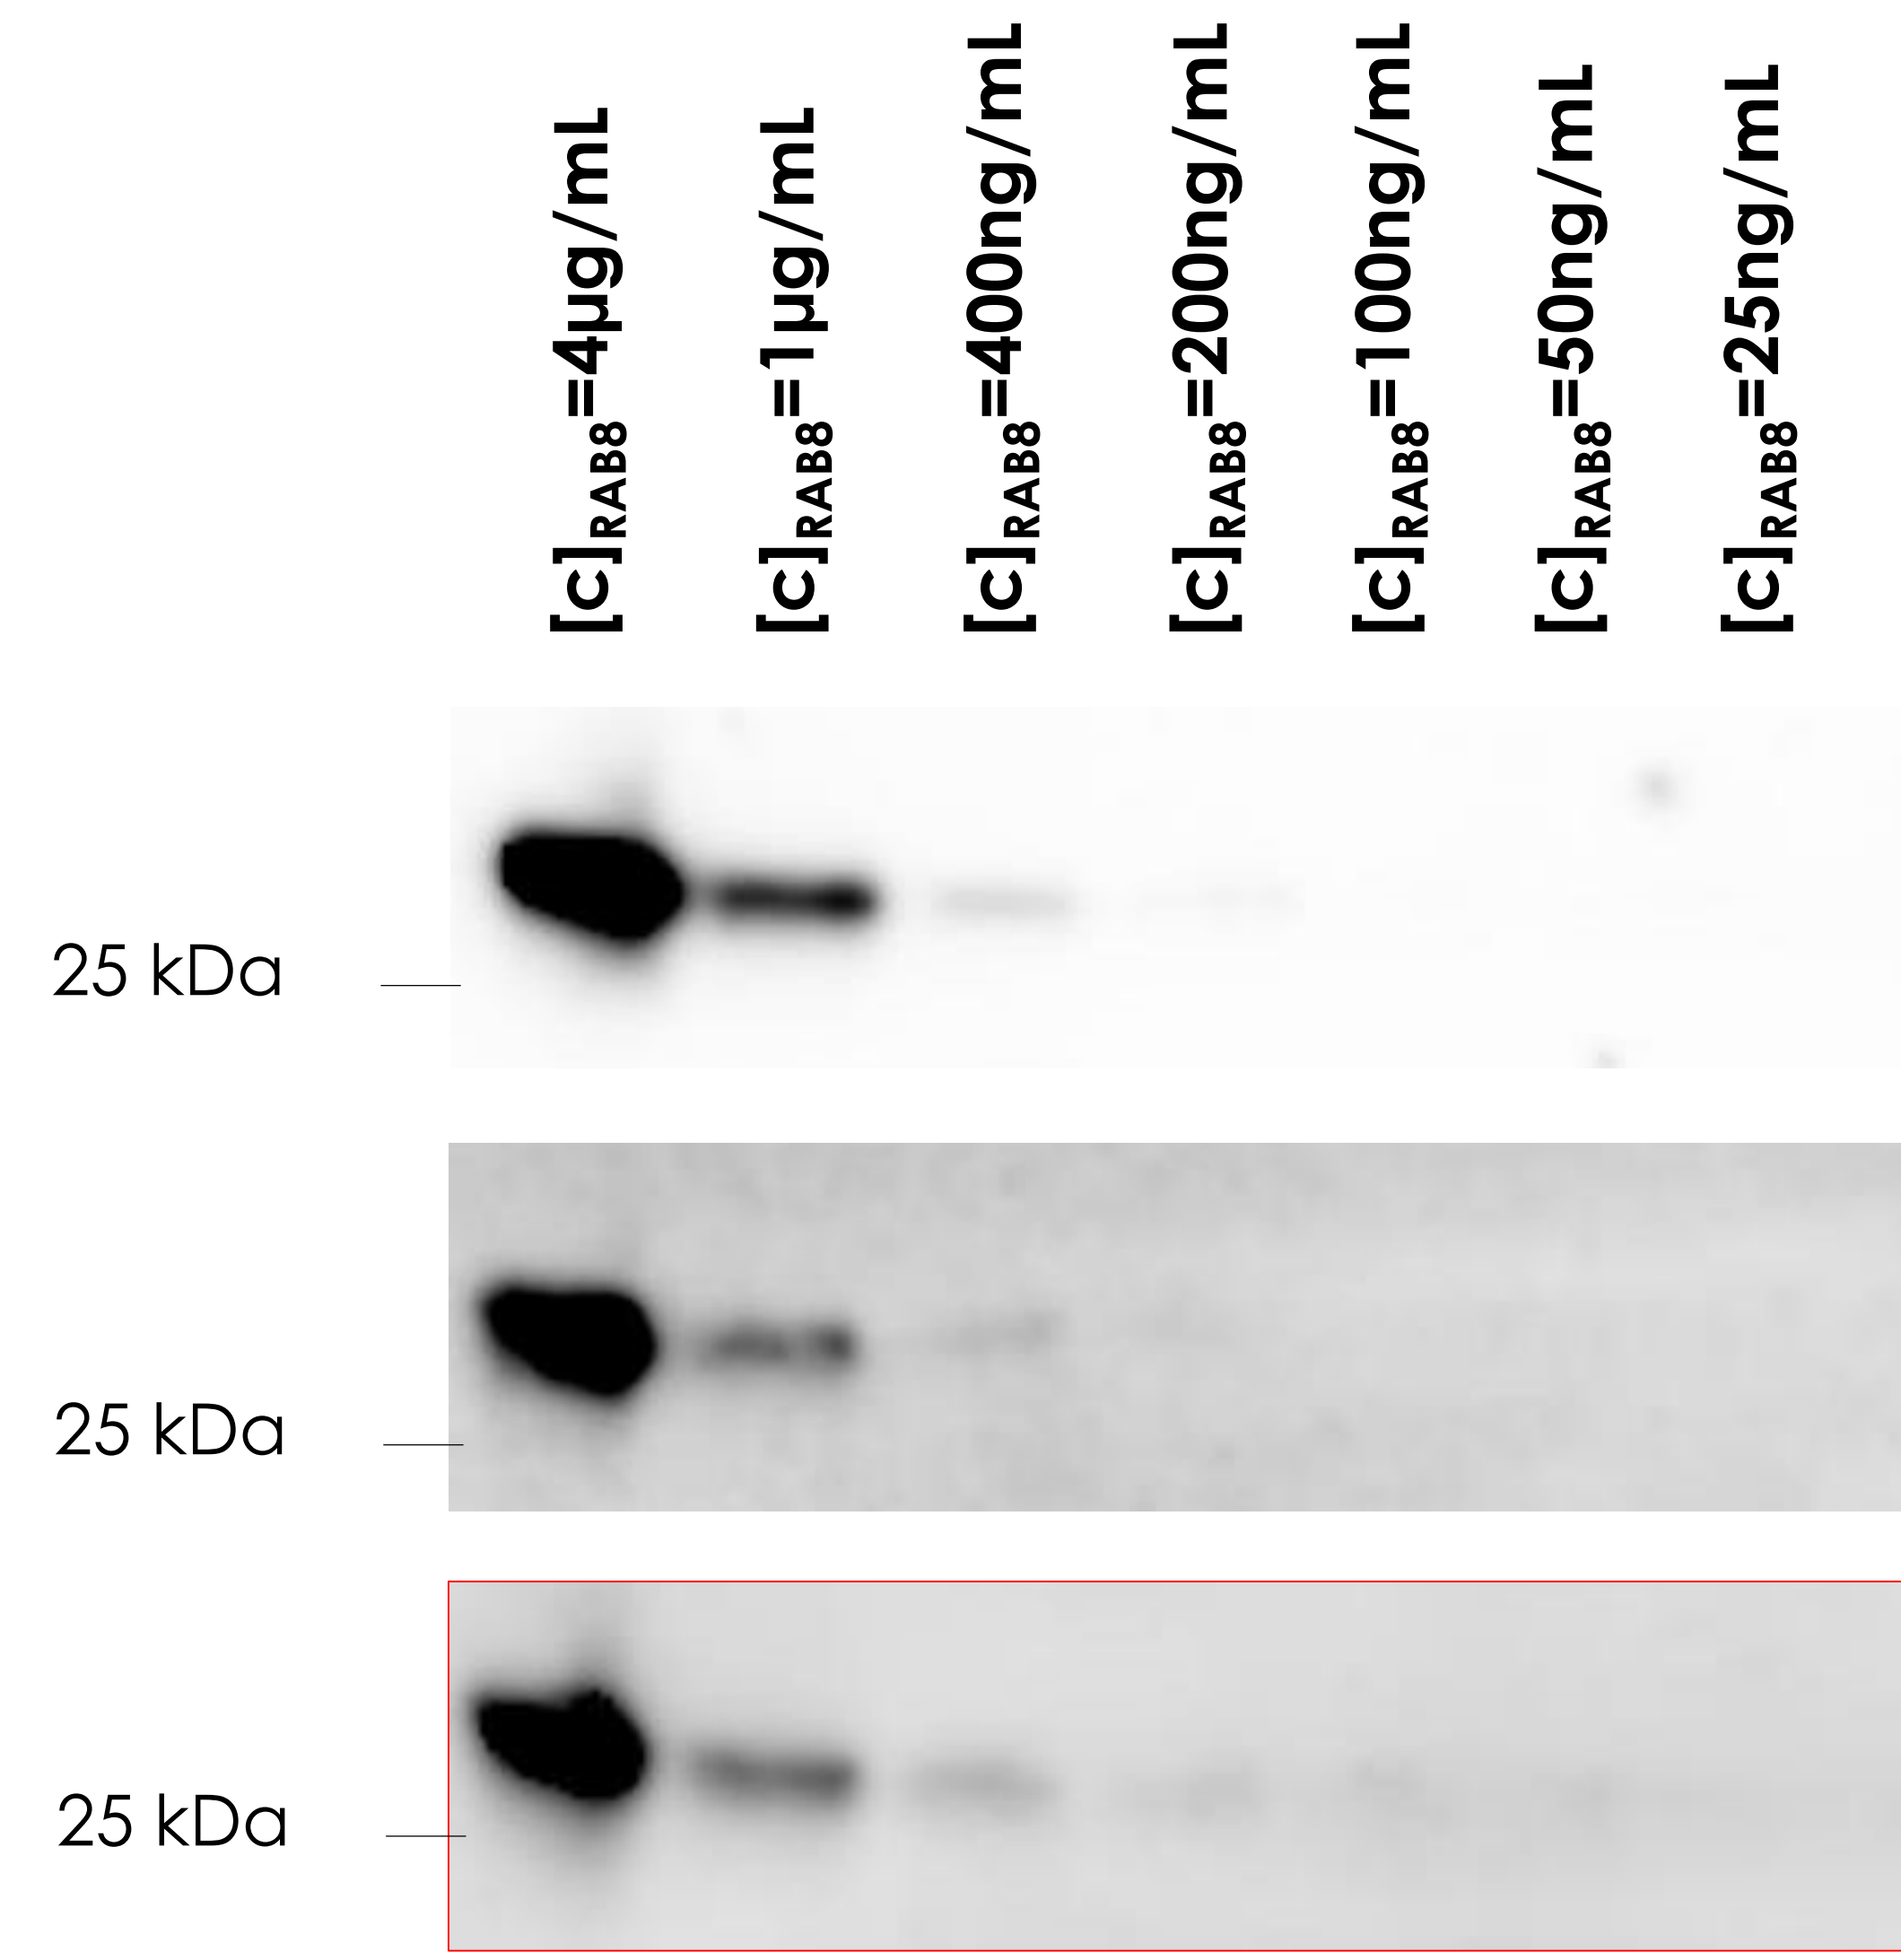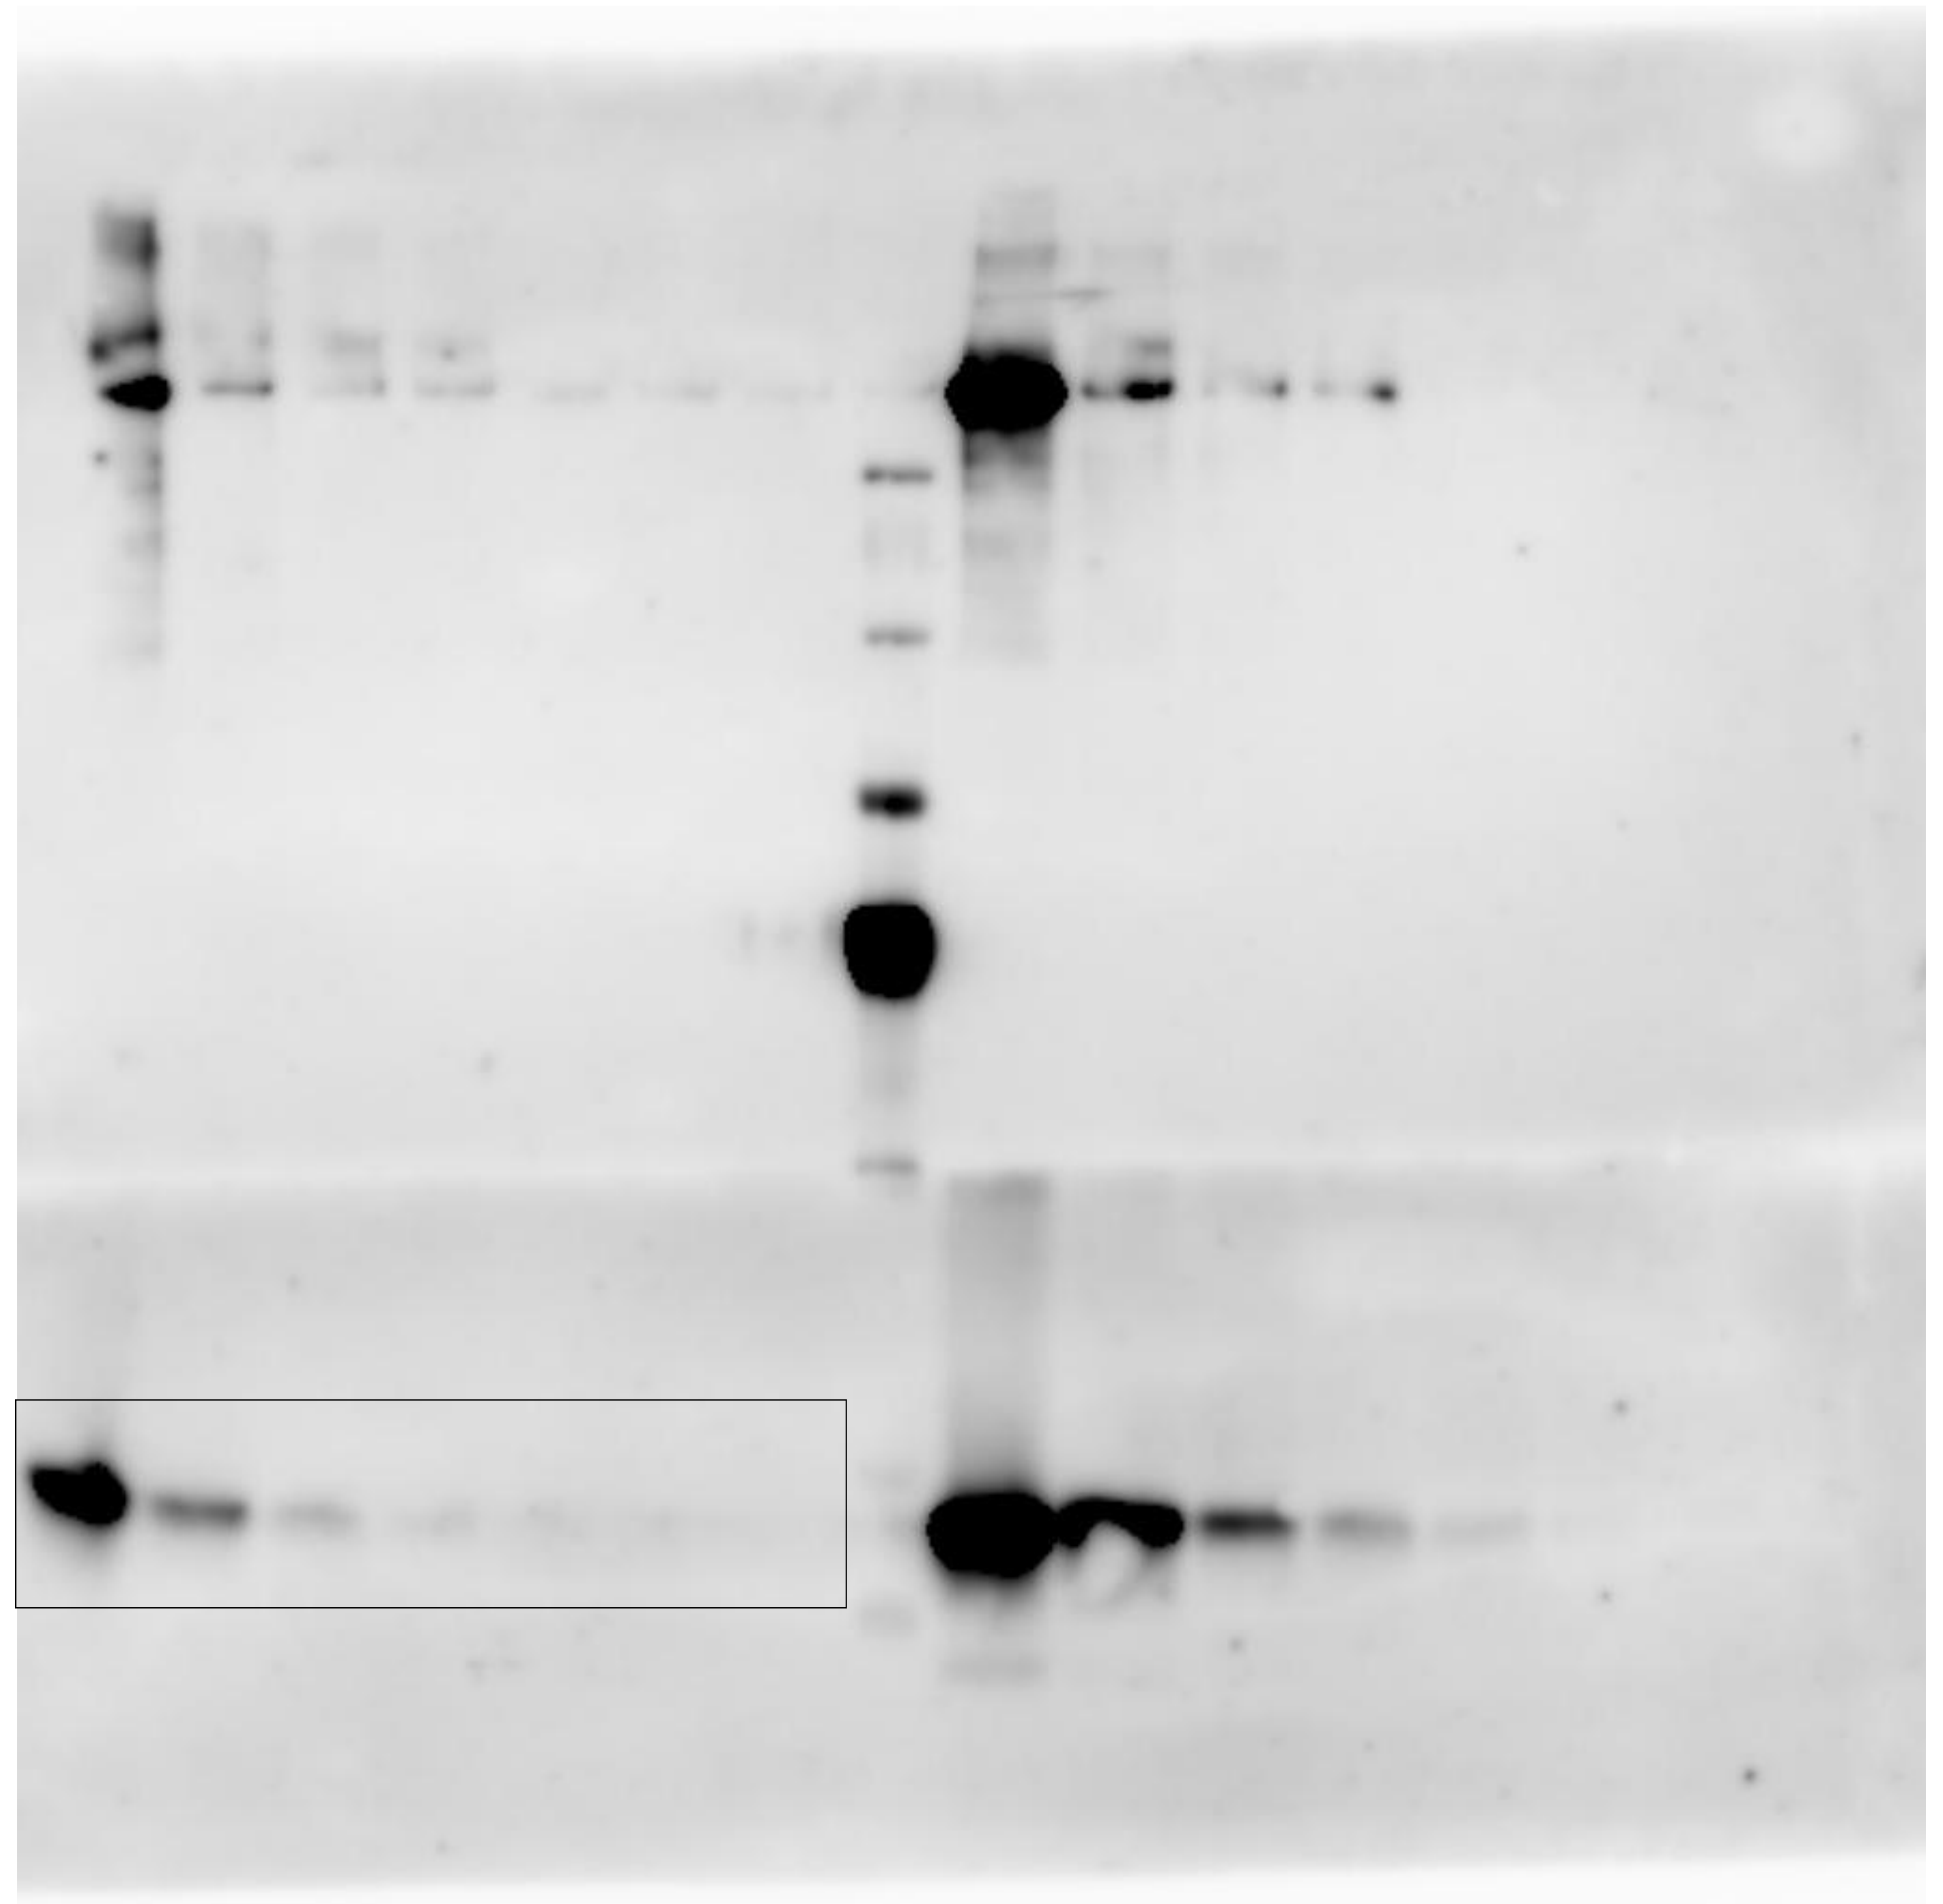



Suppl Figure S6

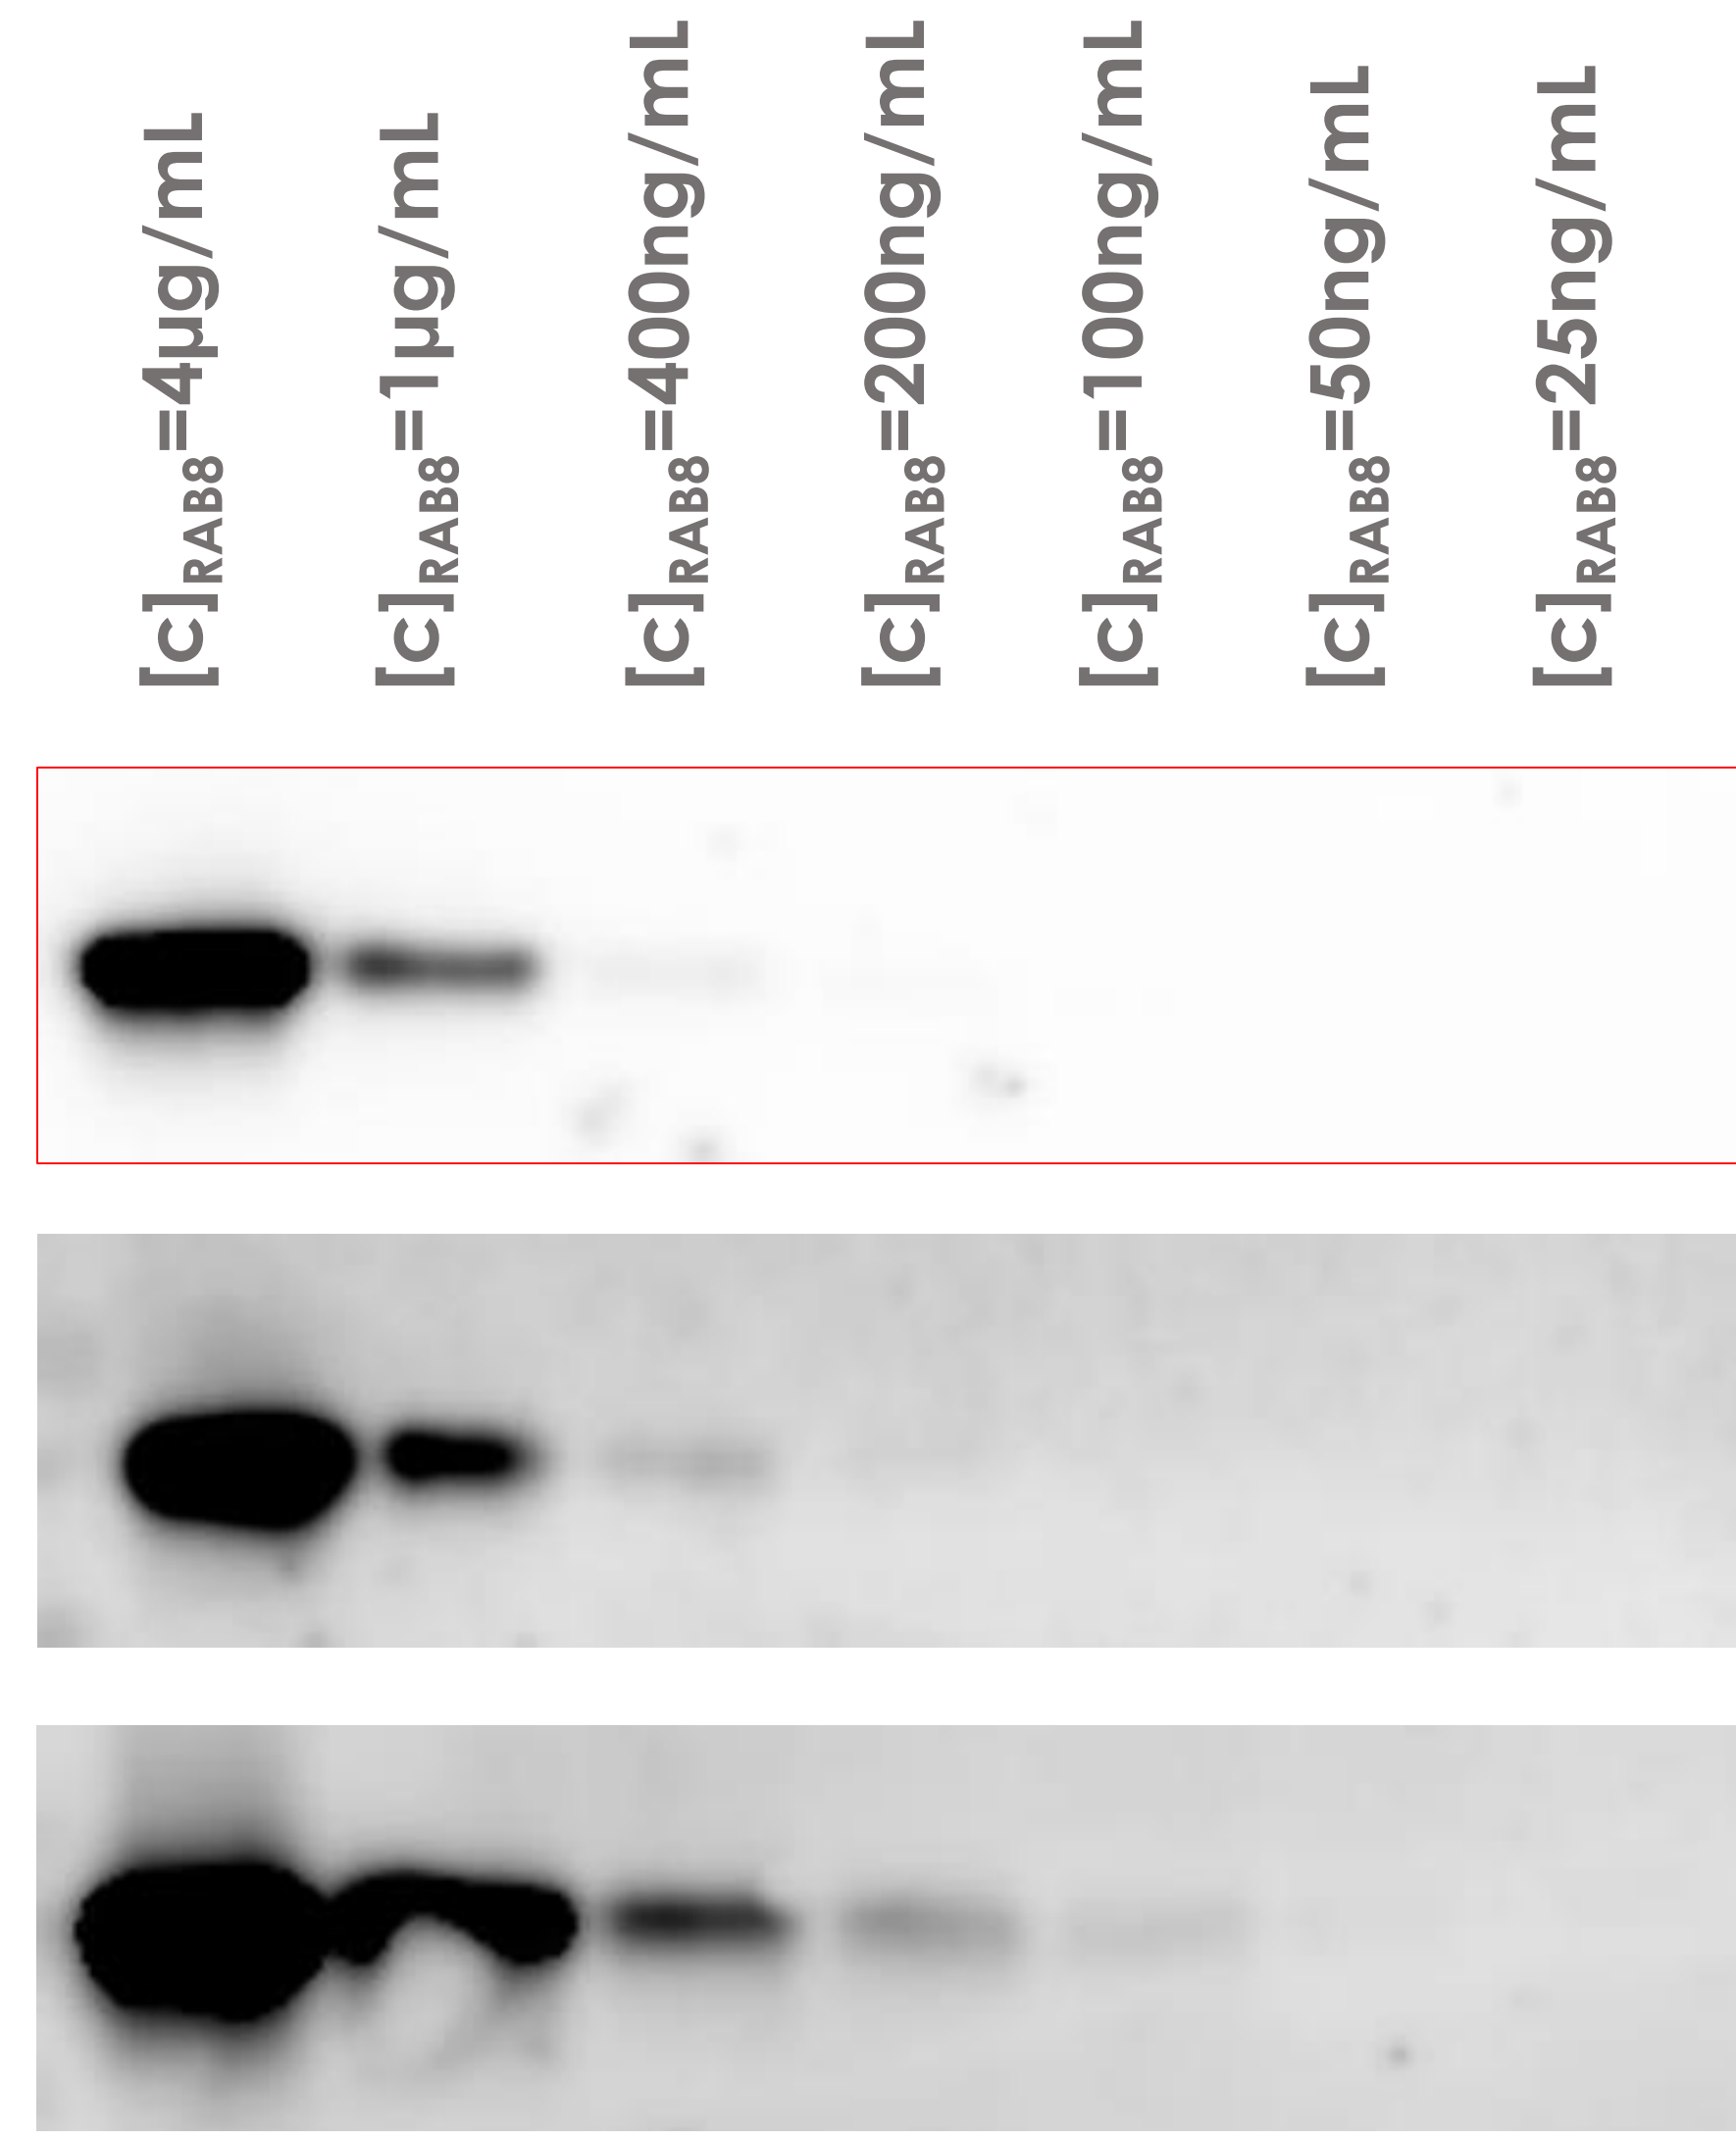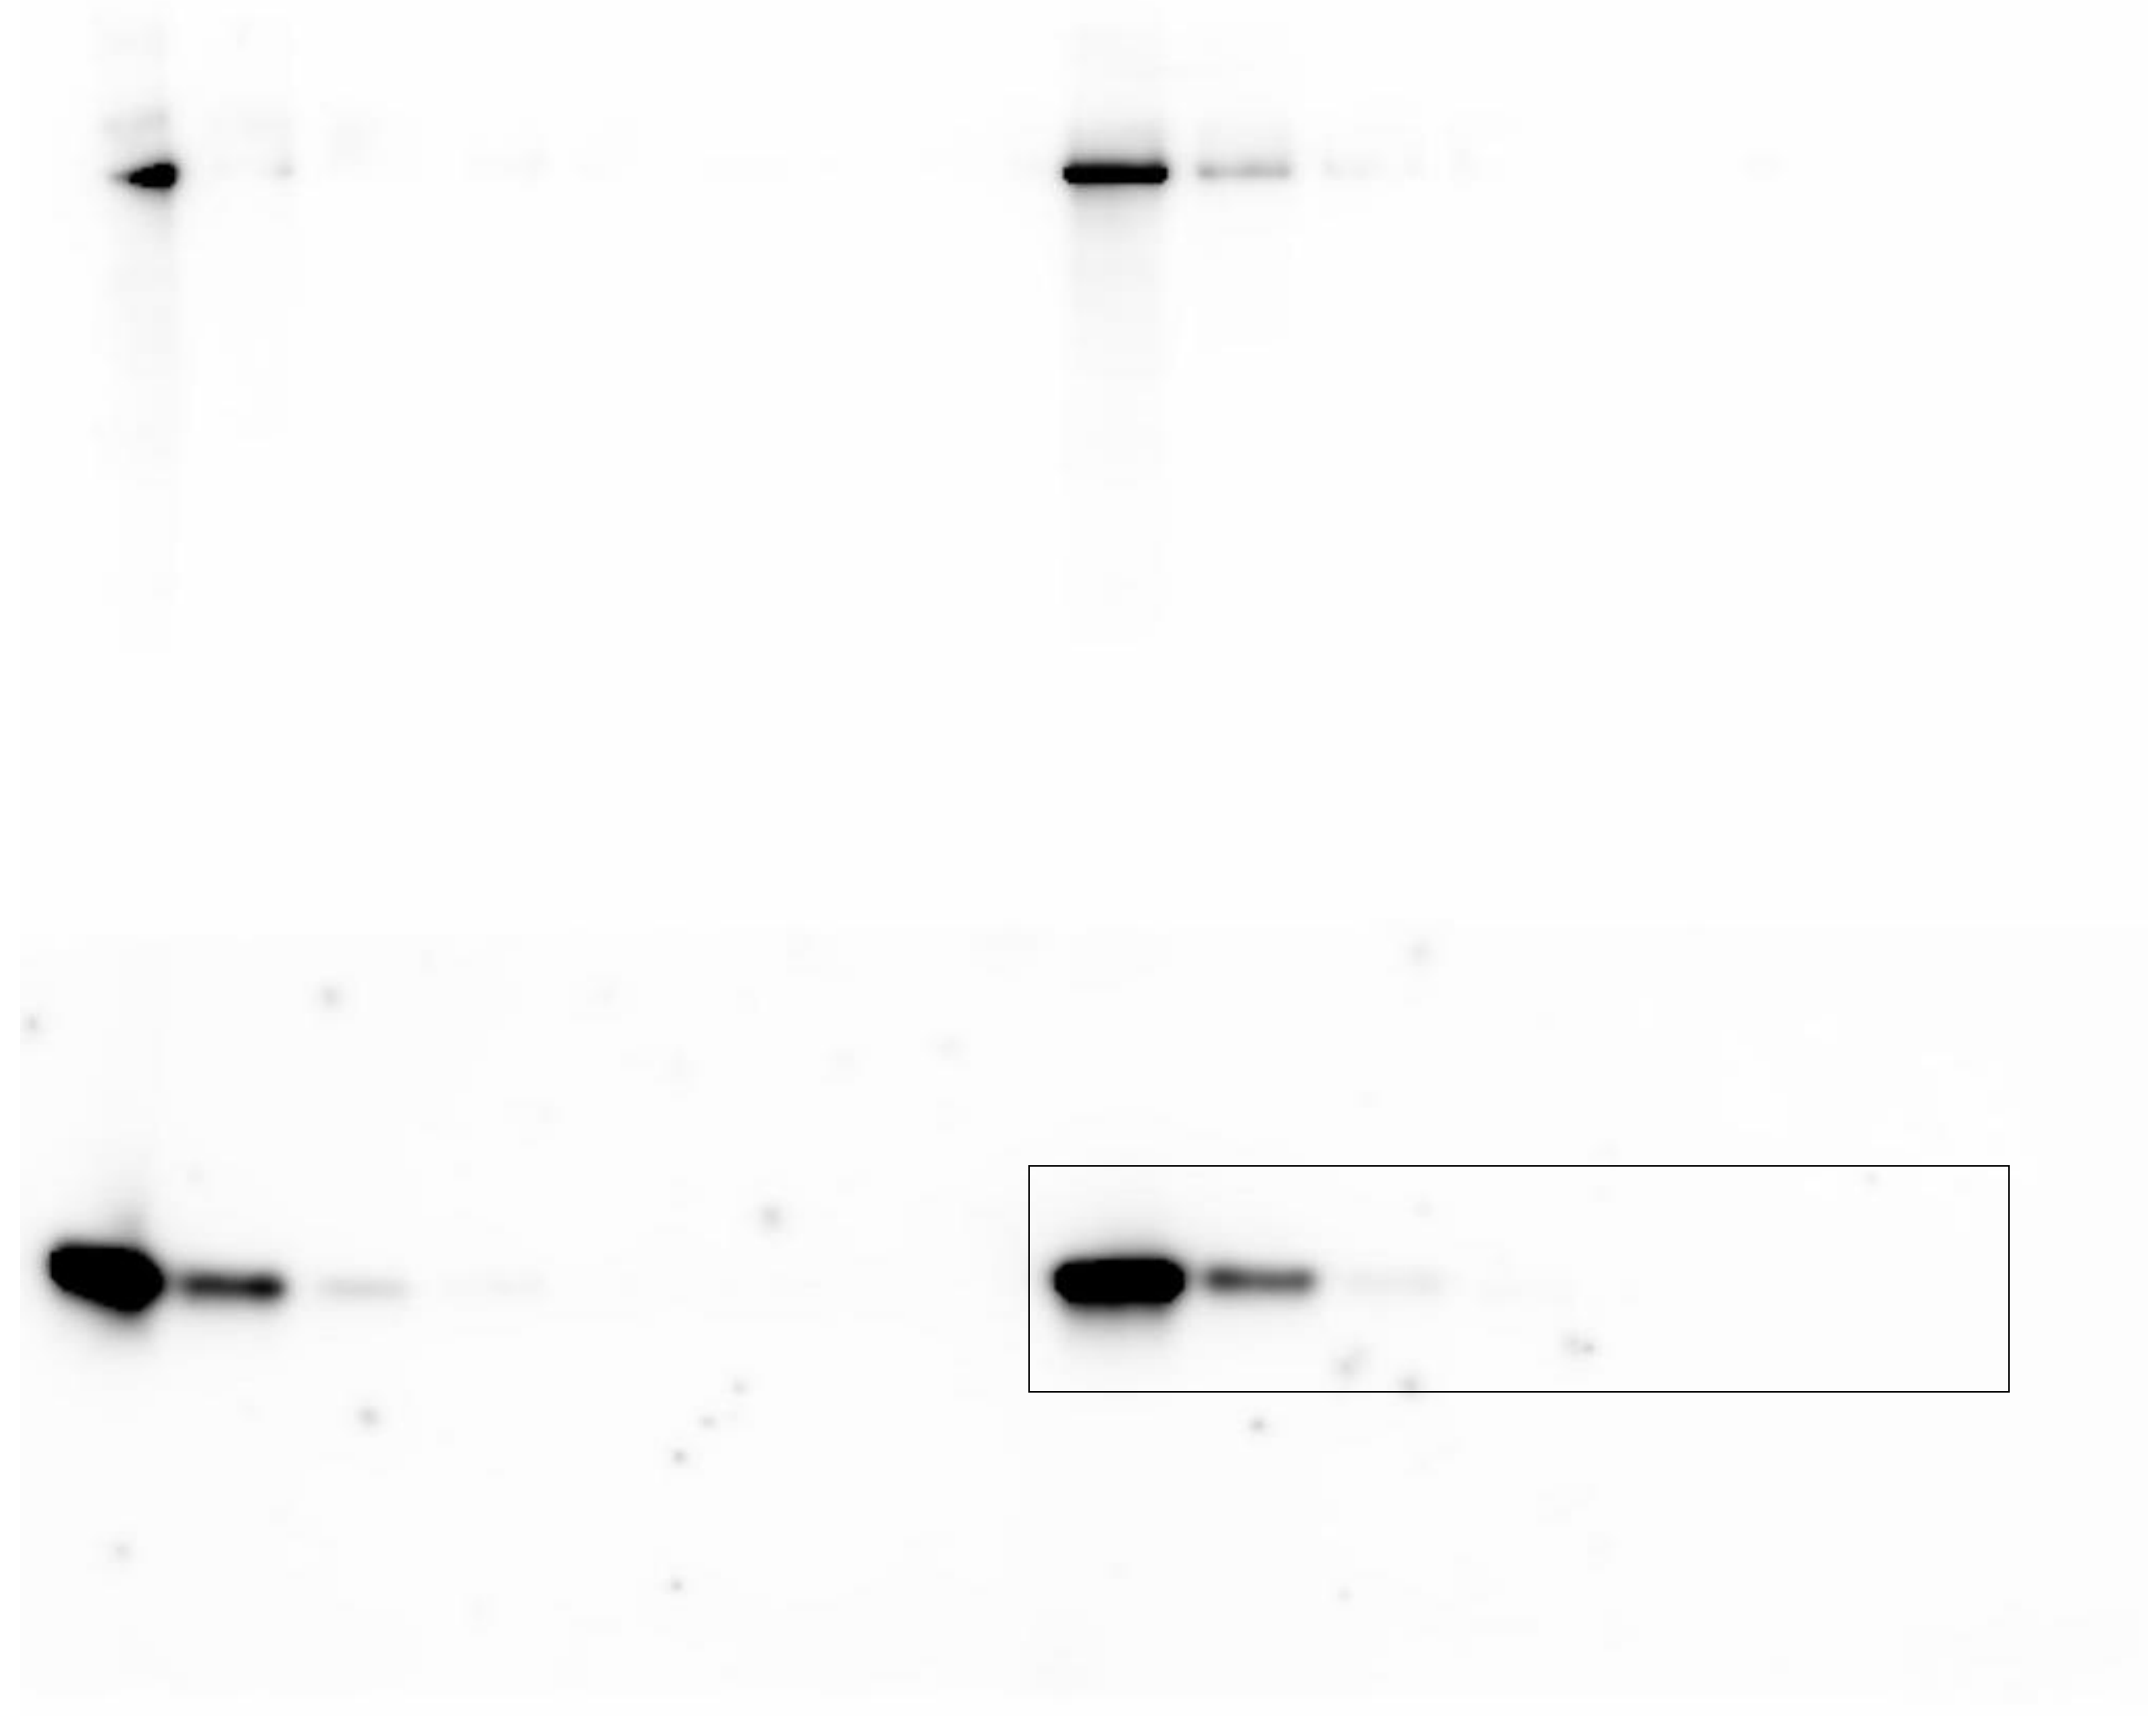

Suppl Figure S6

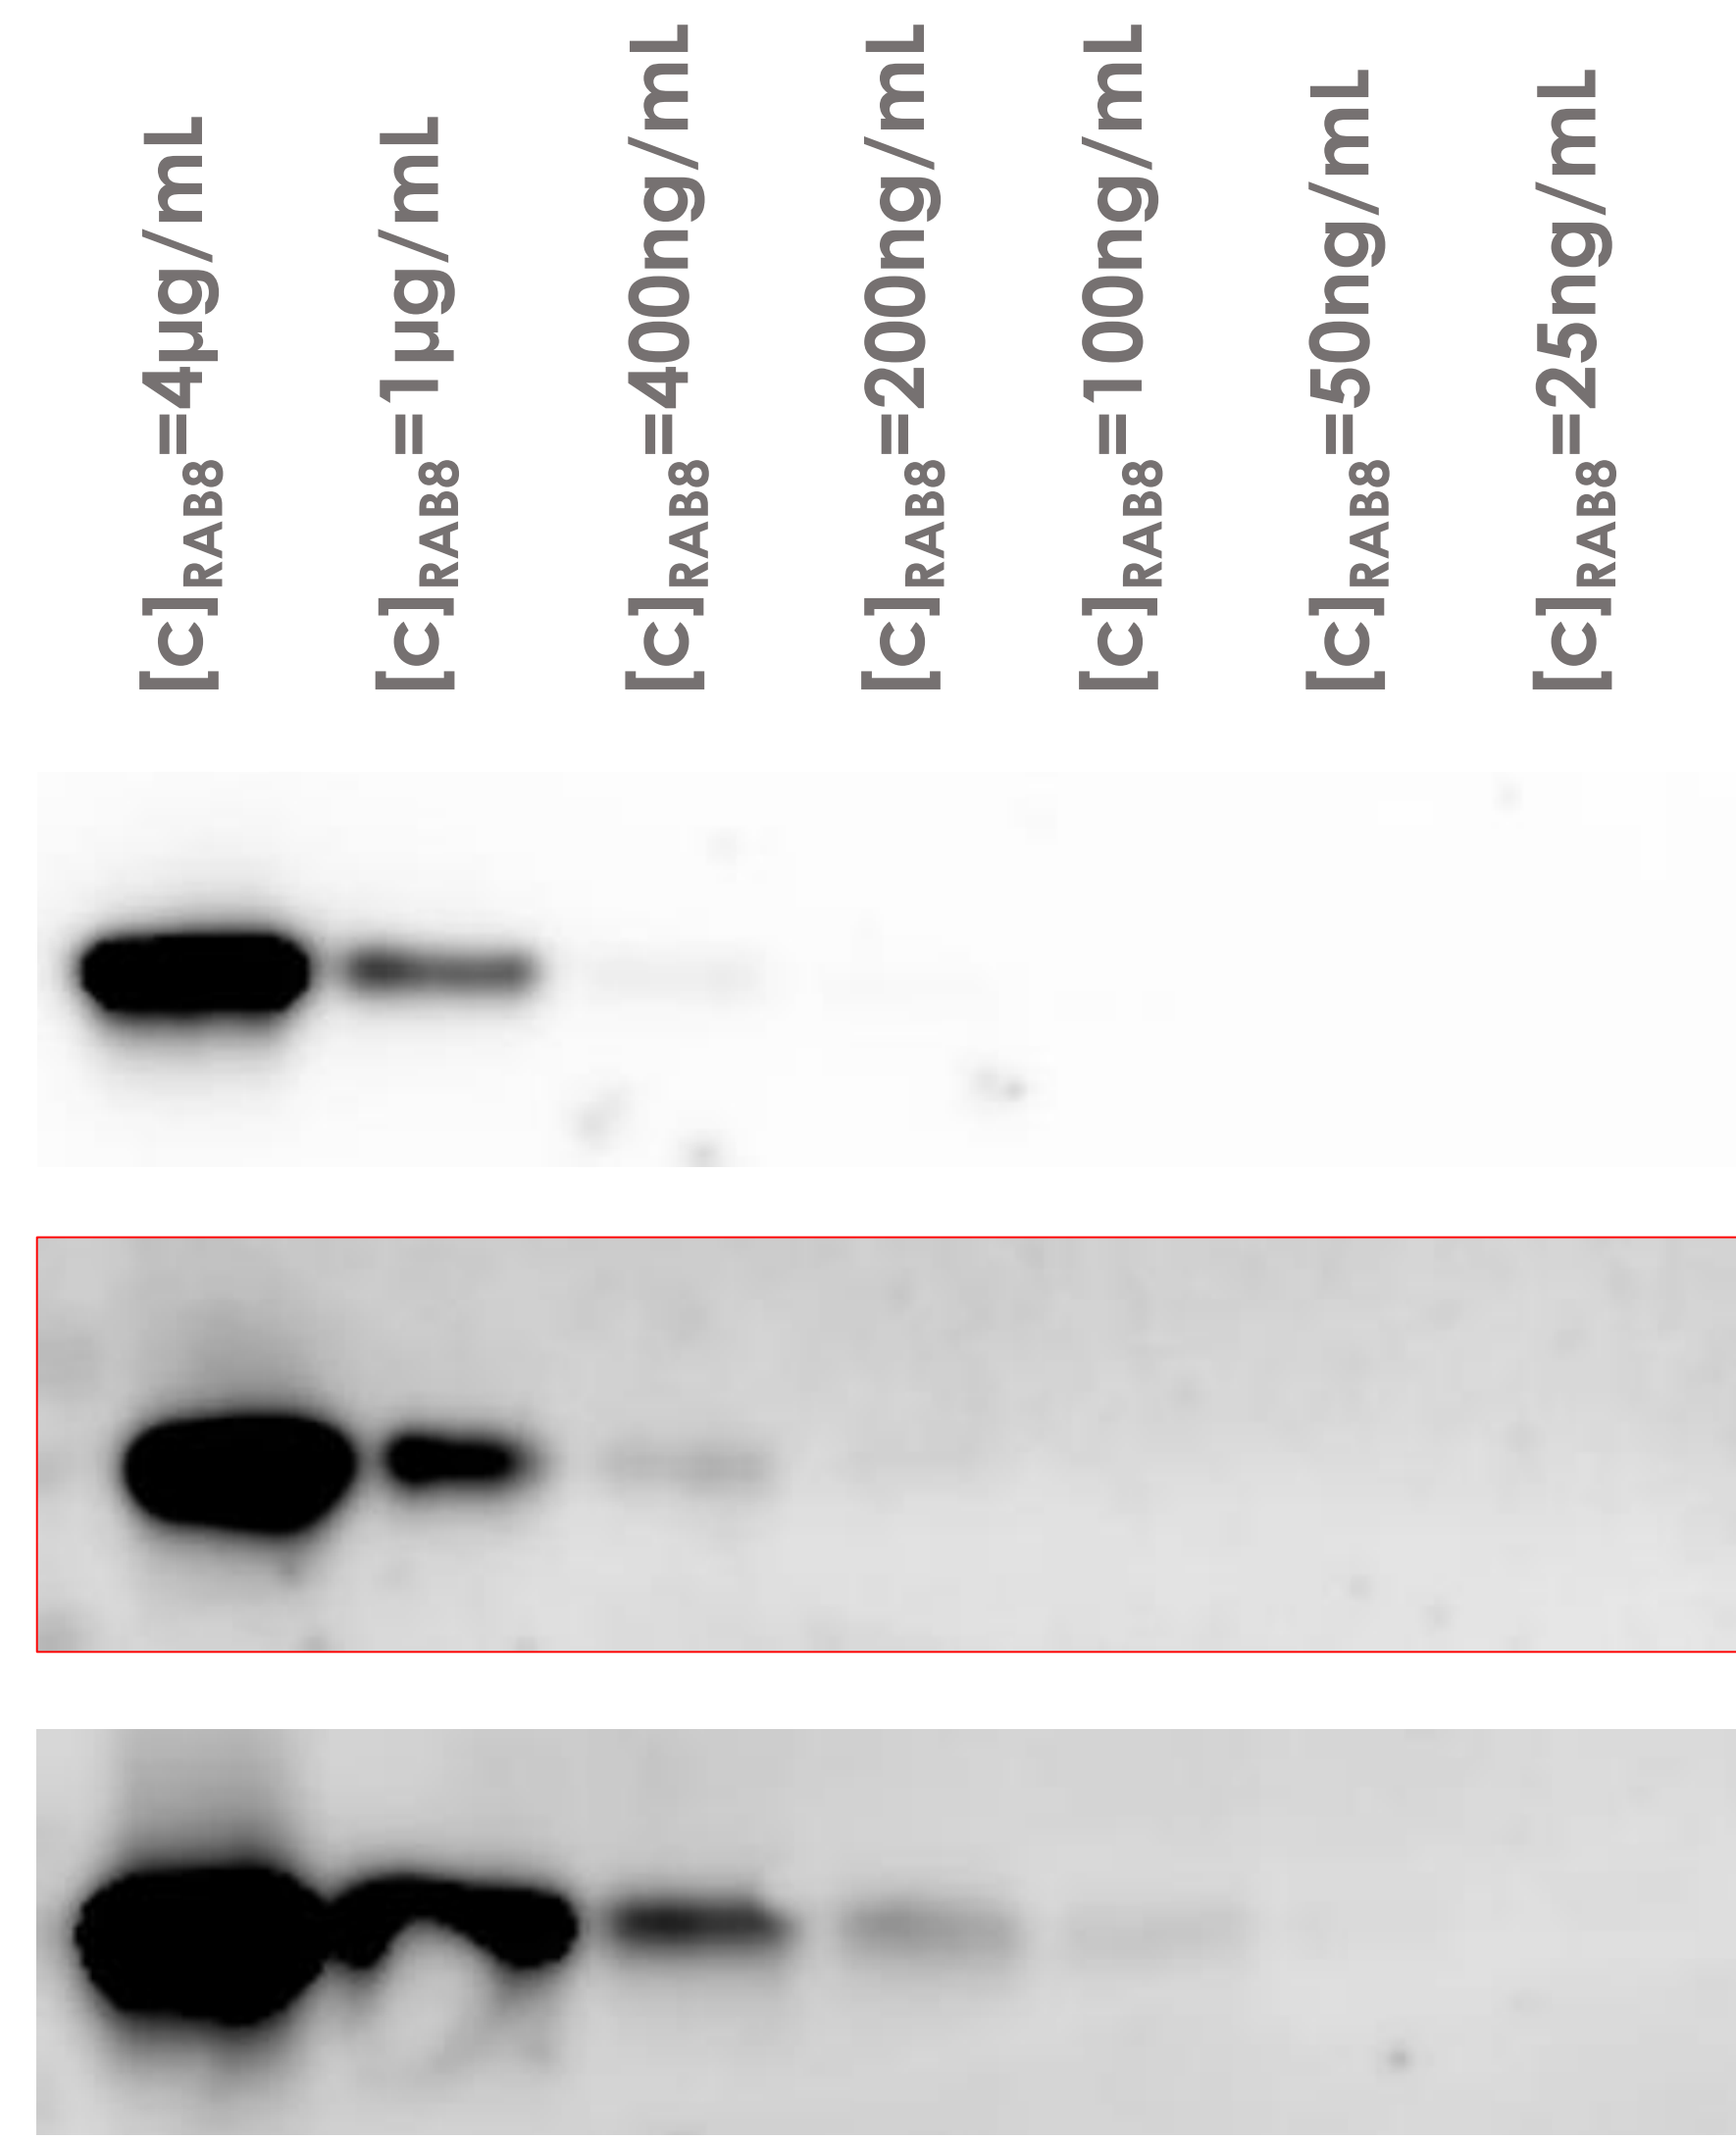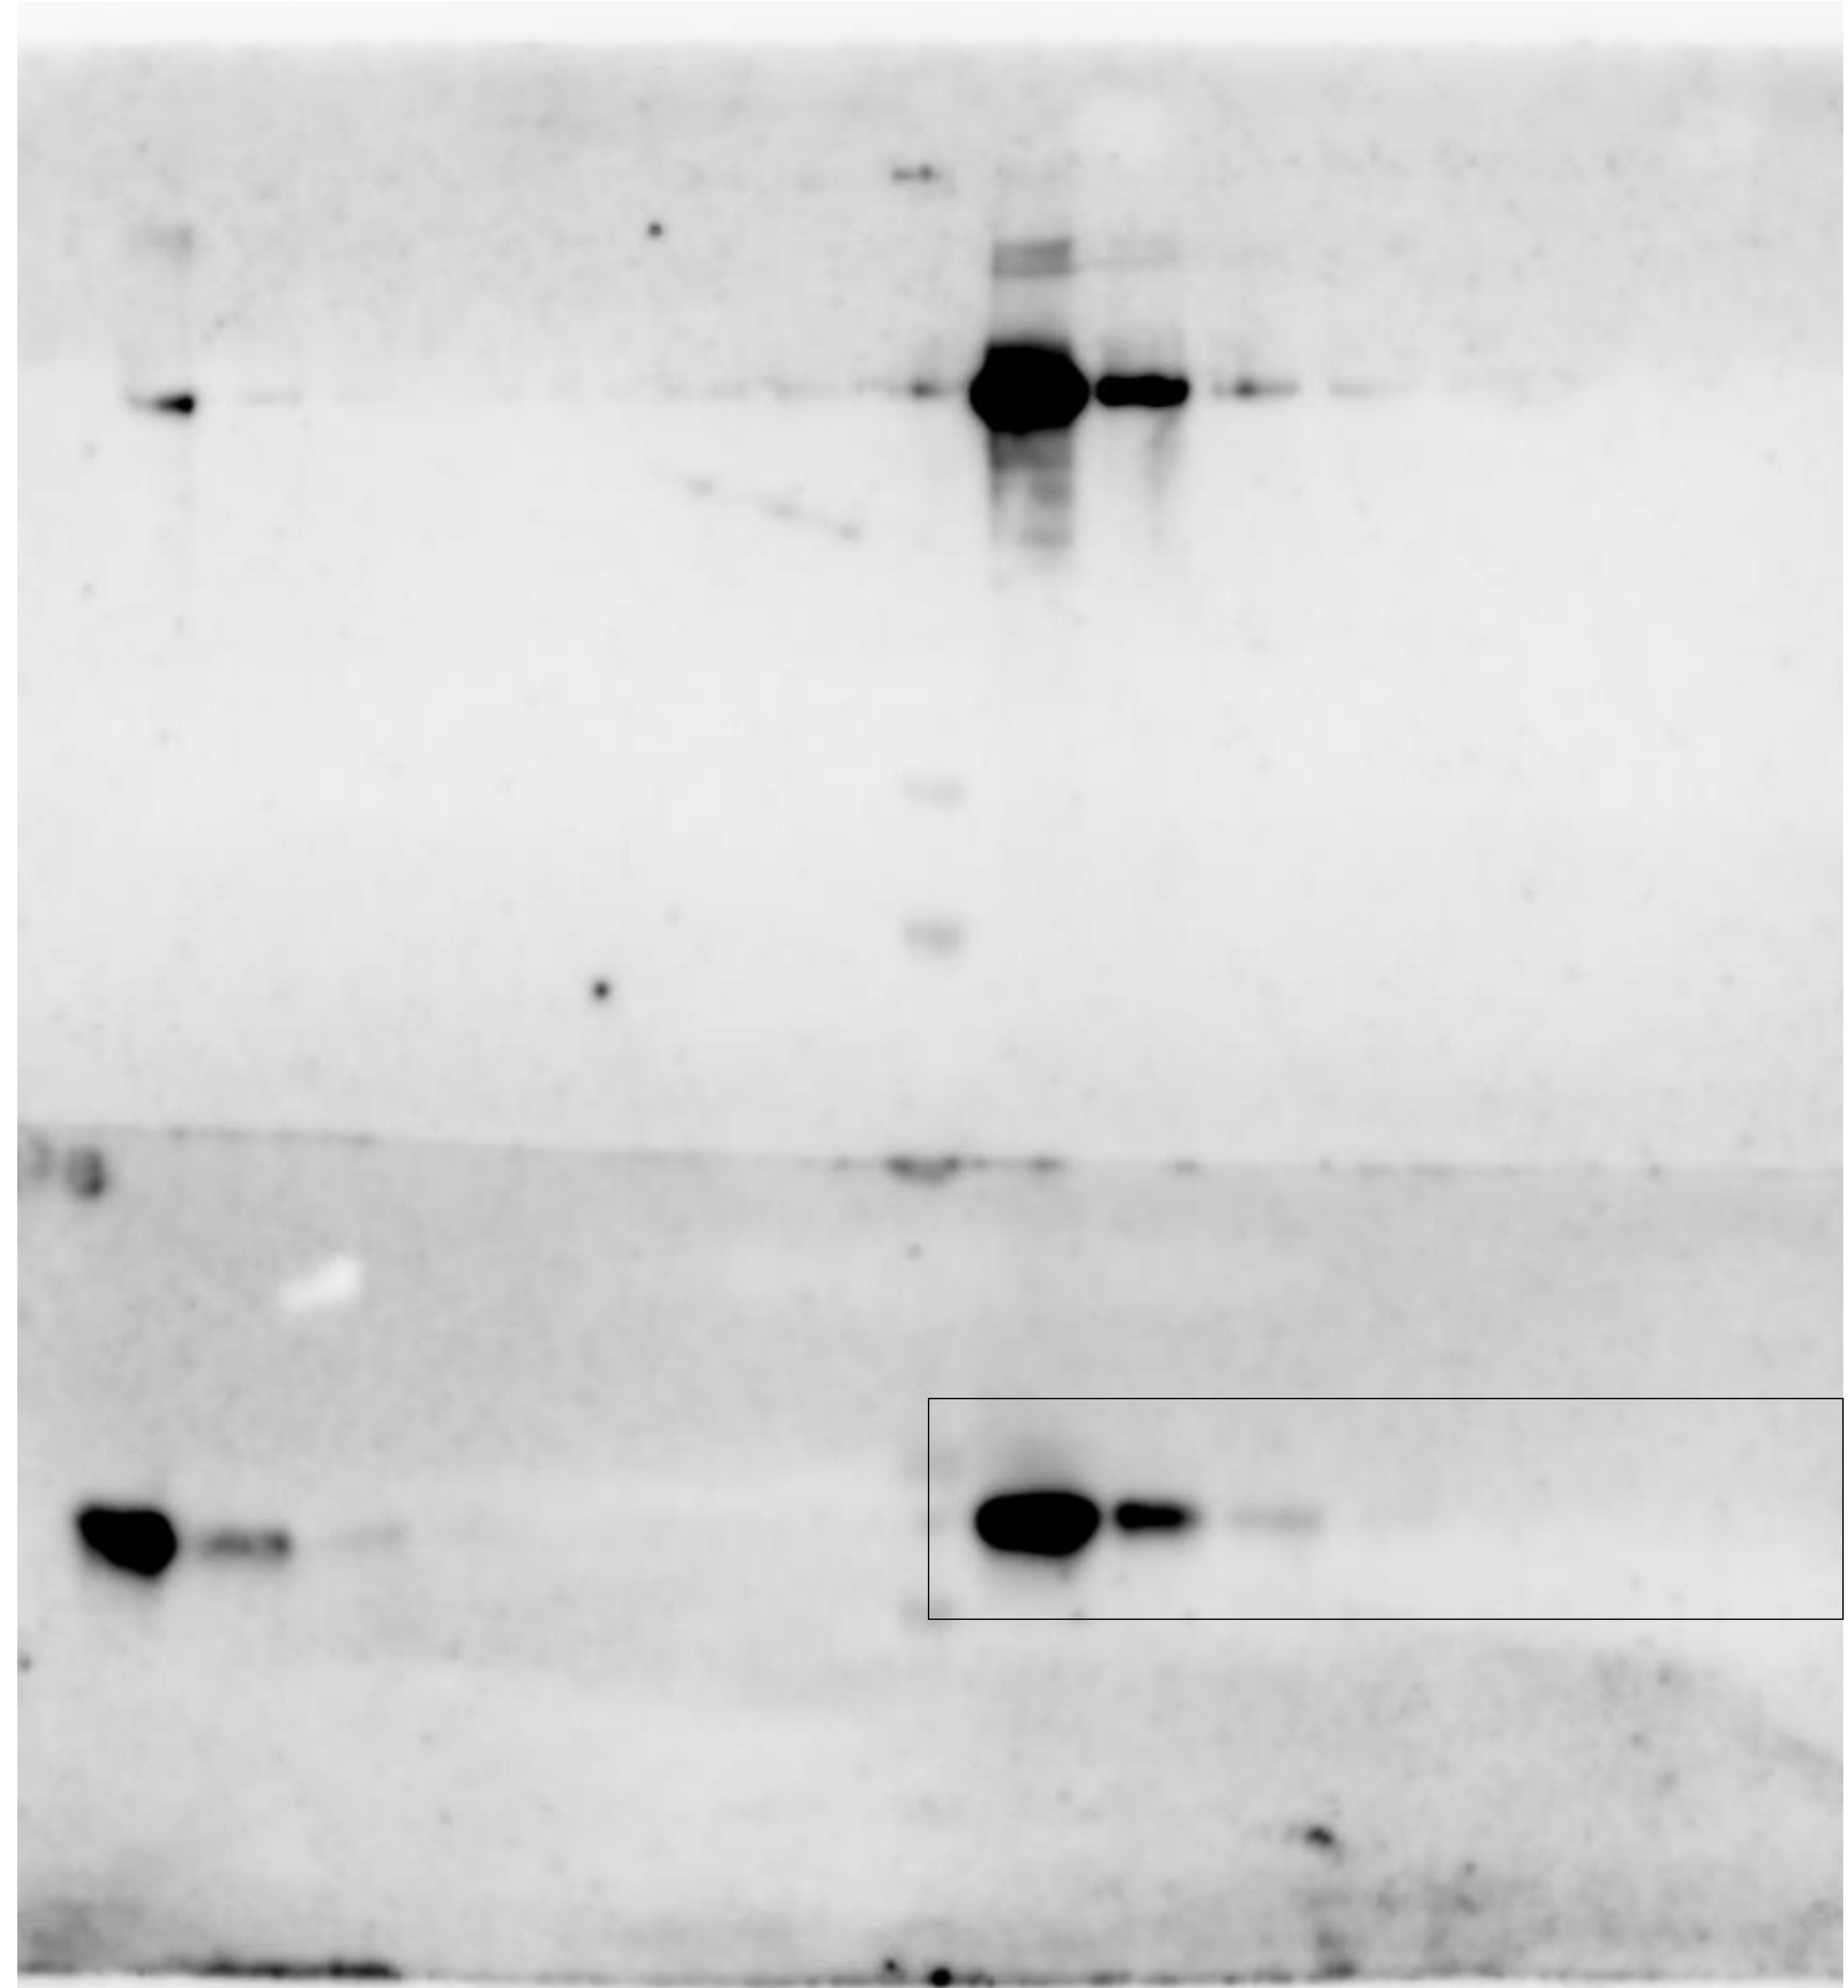

Suppl Figure S6

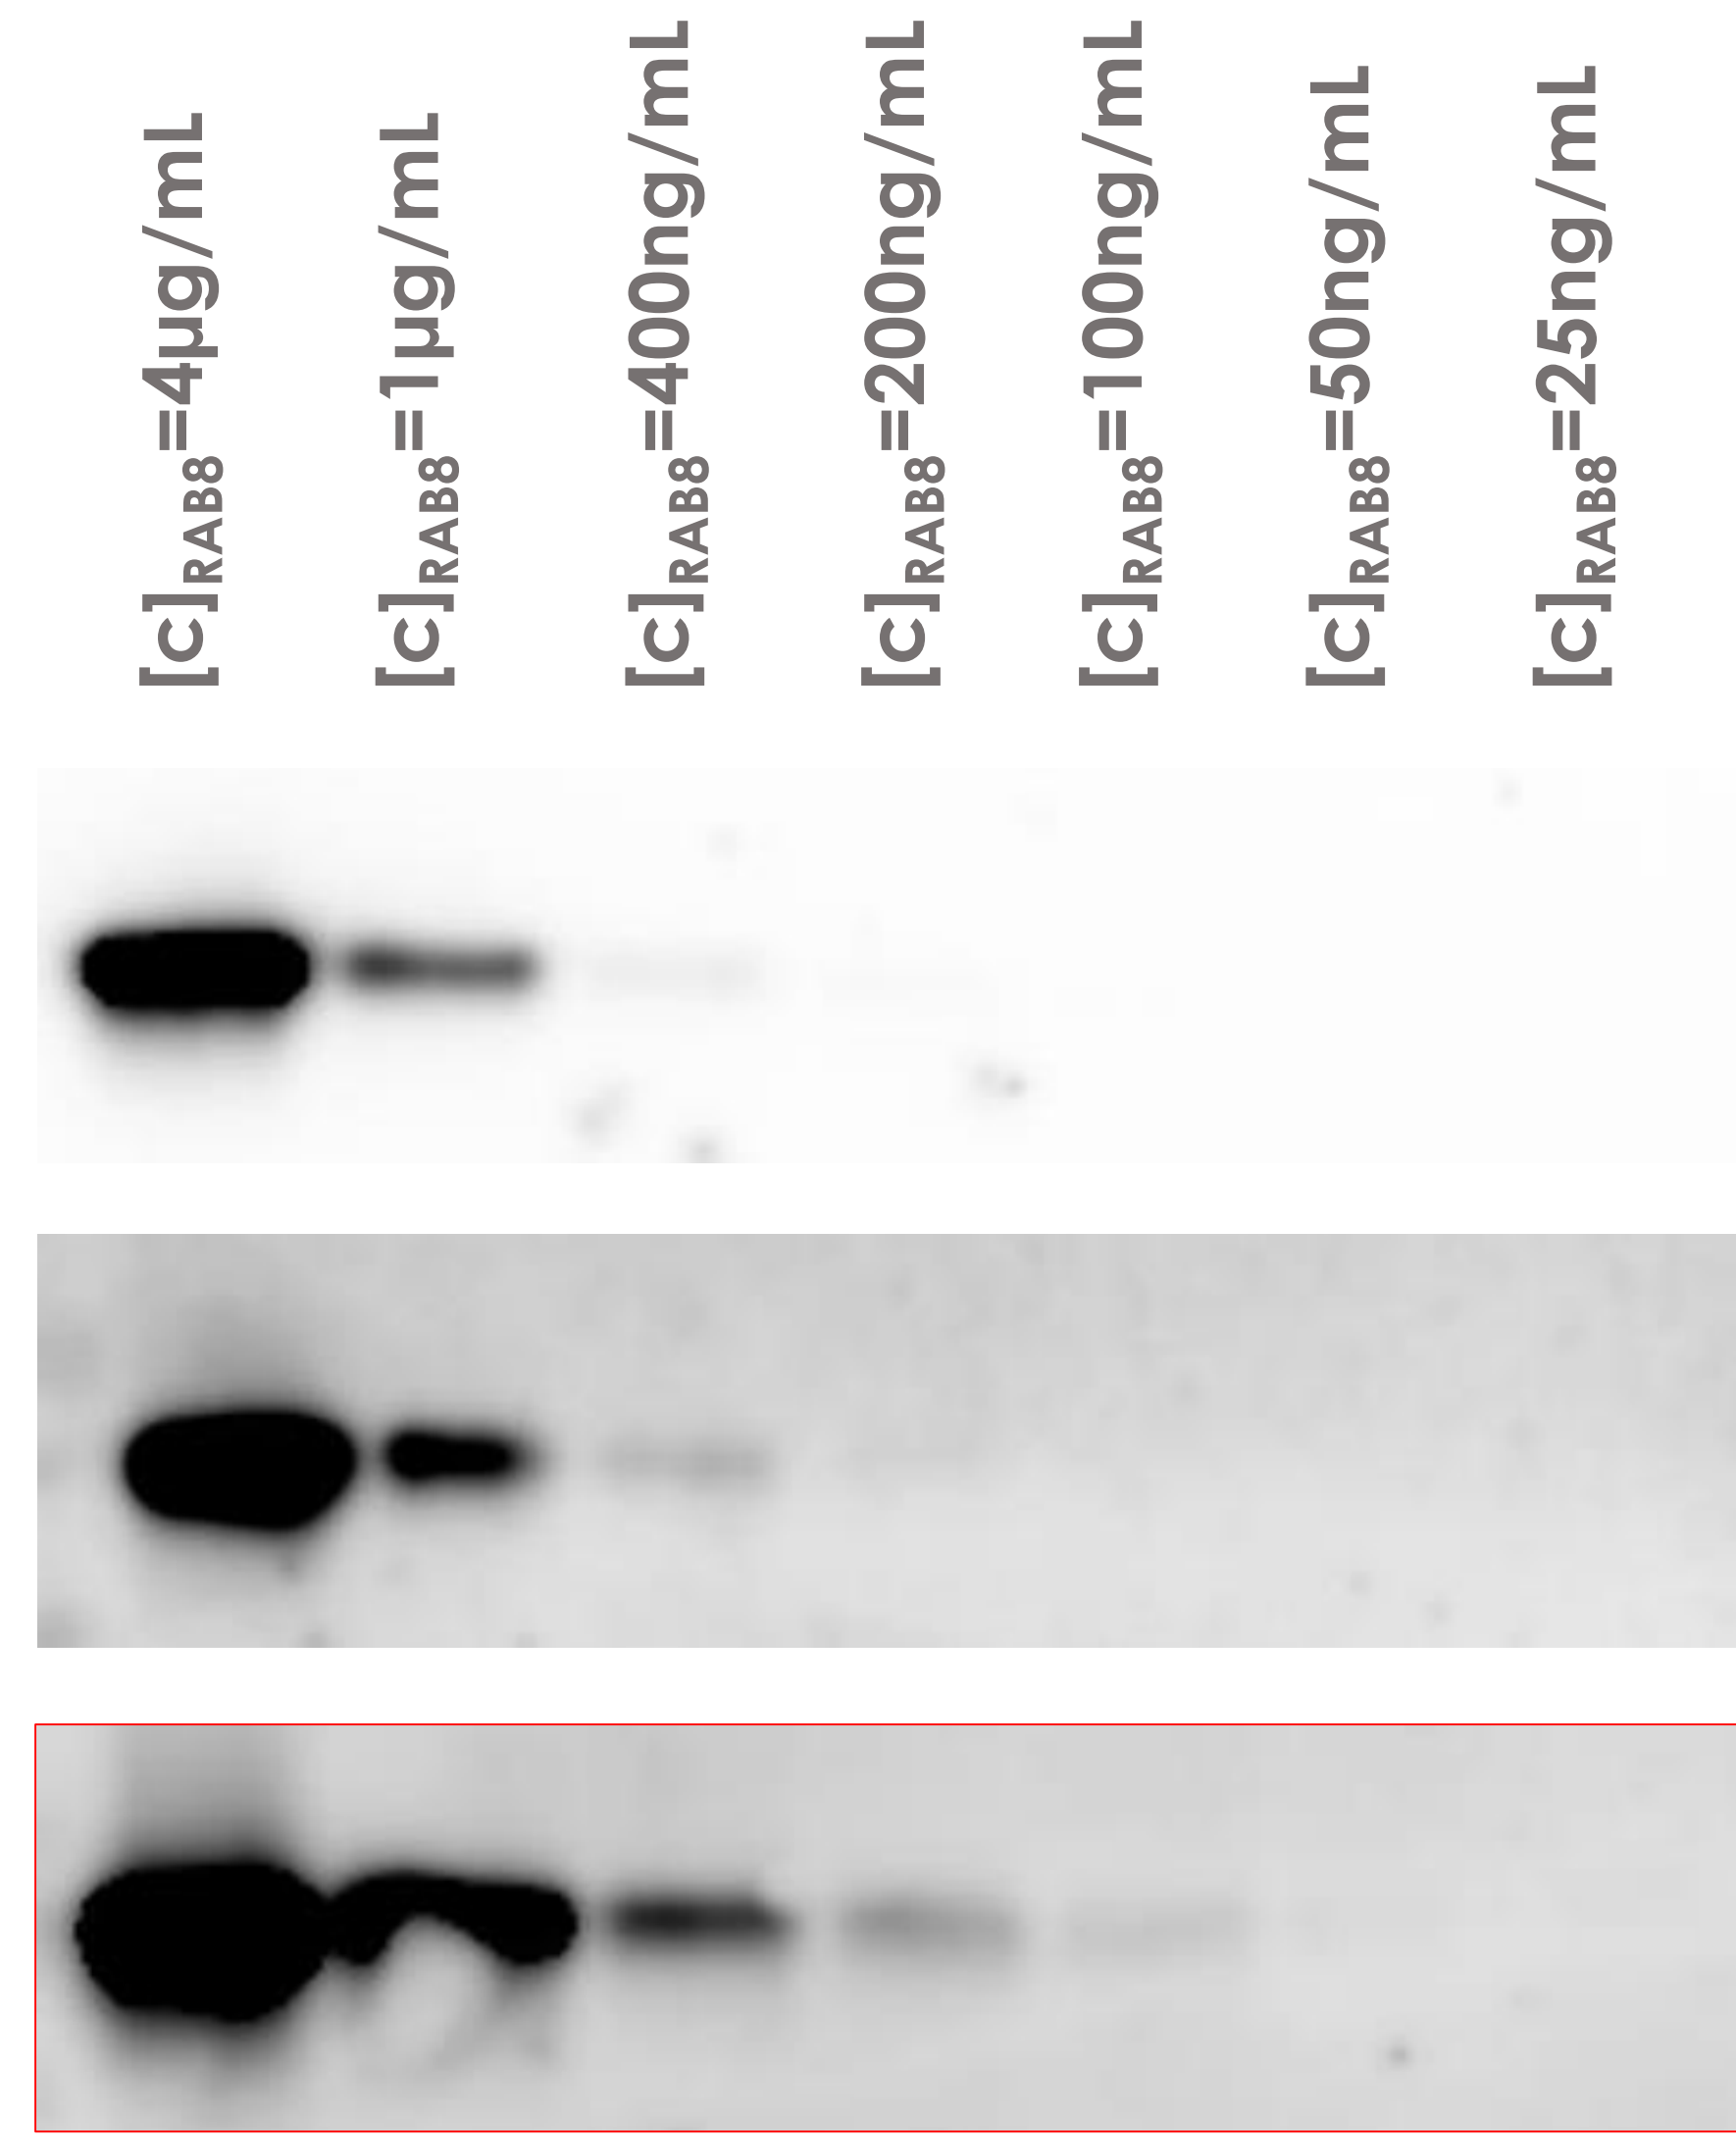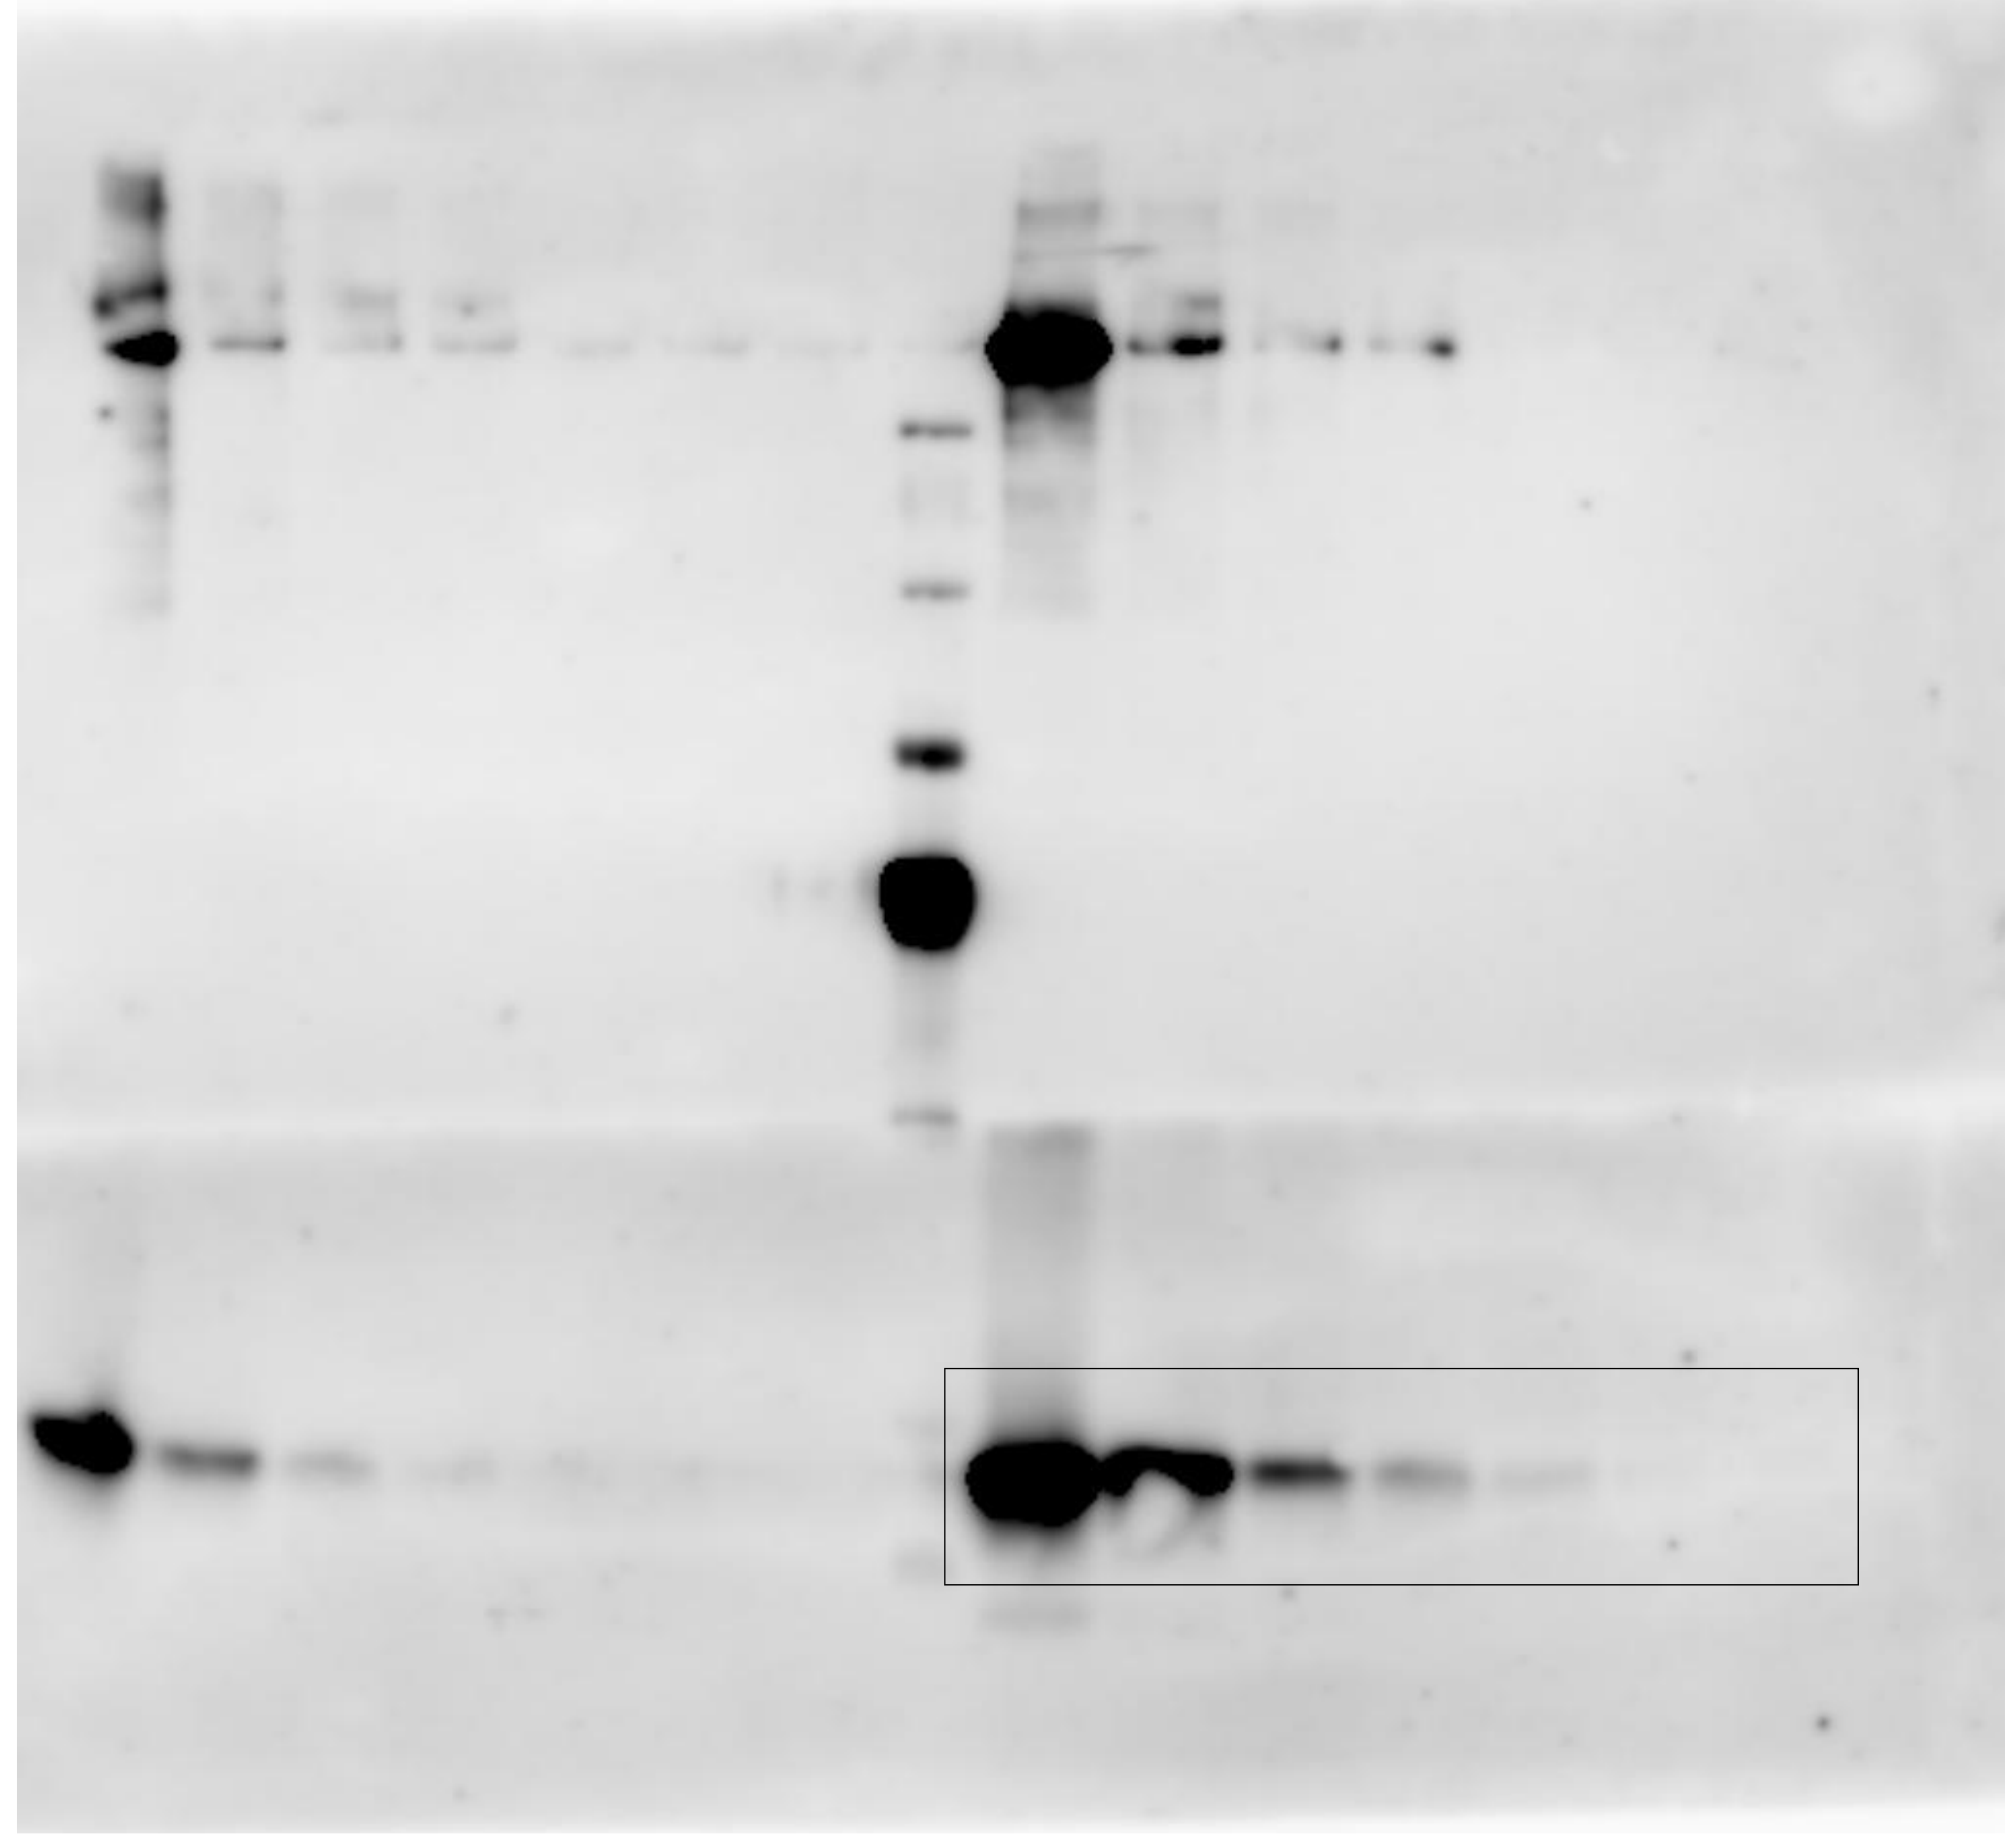

Suppl Figure 7

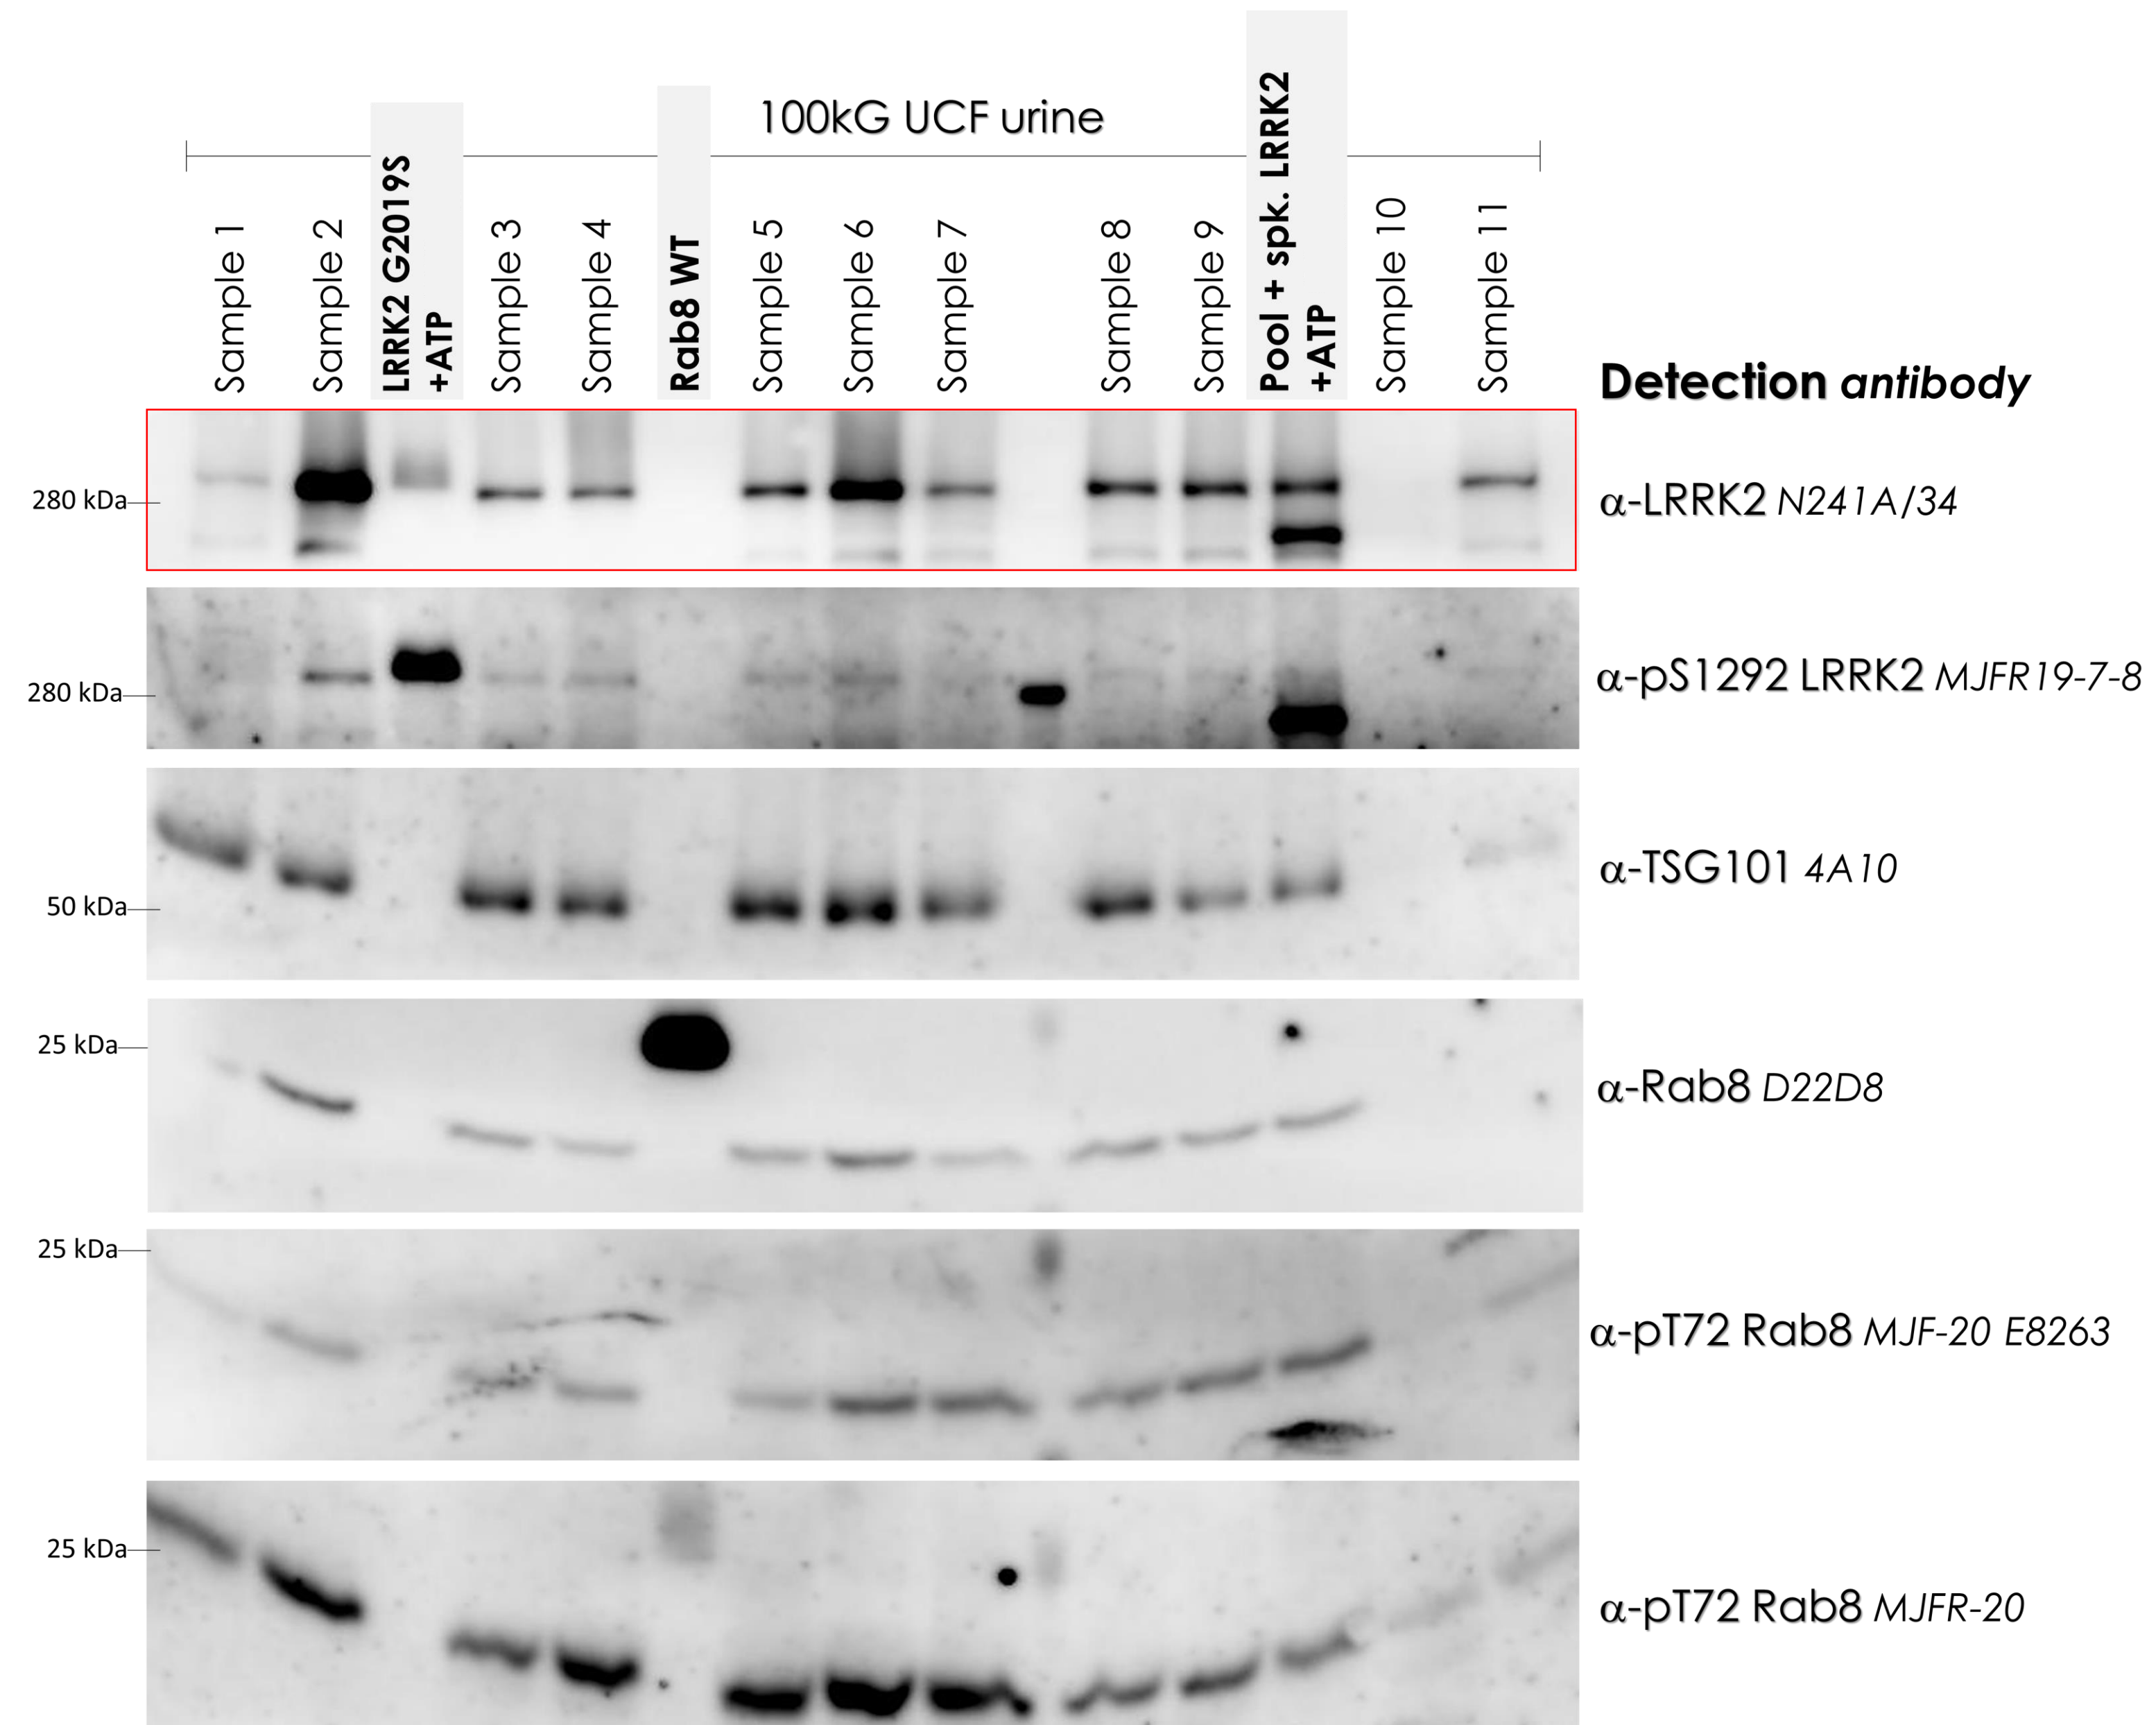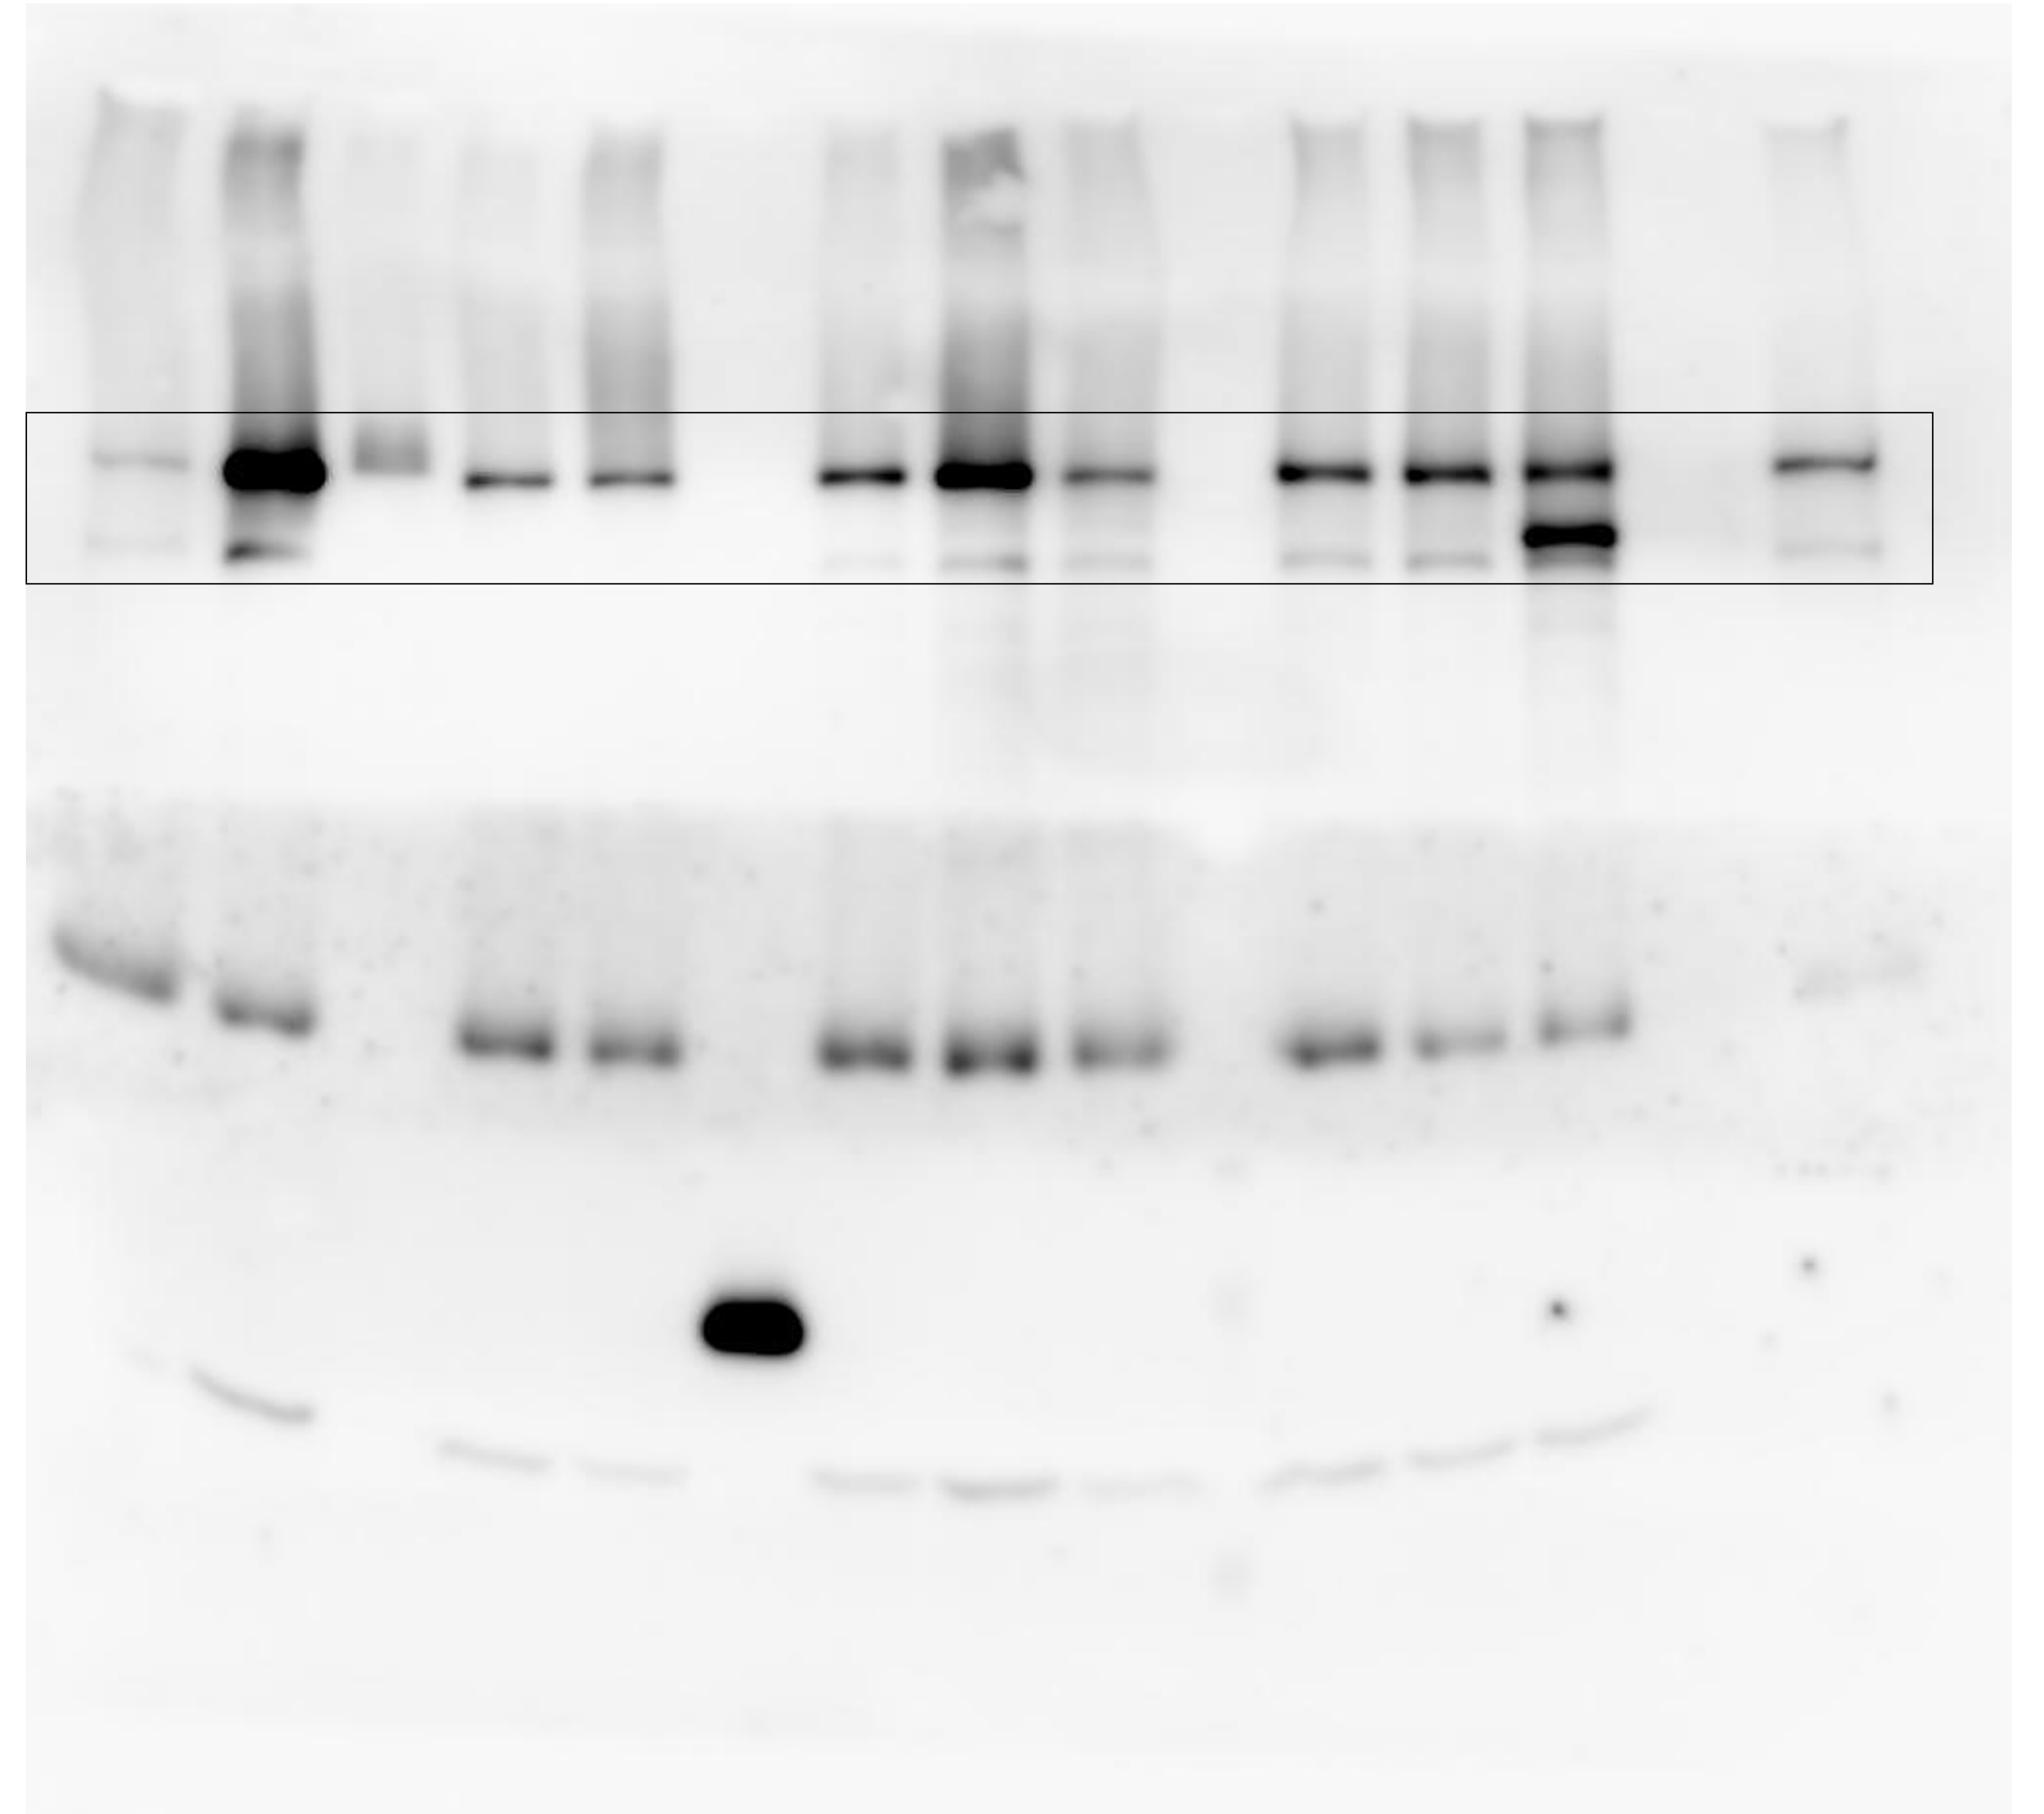

Suppl Figure 7

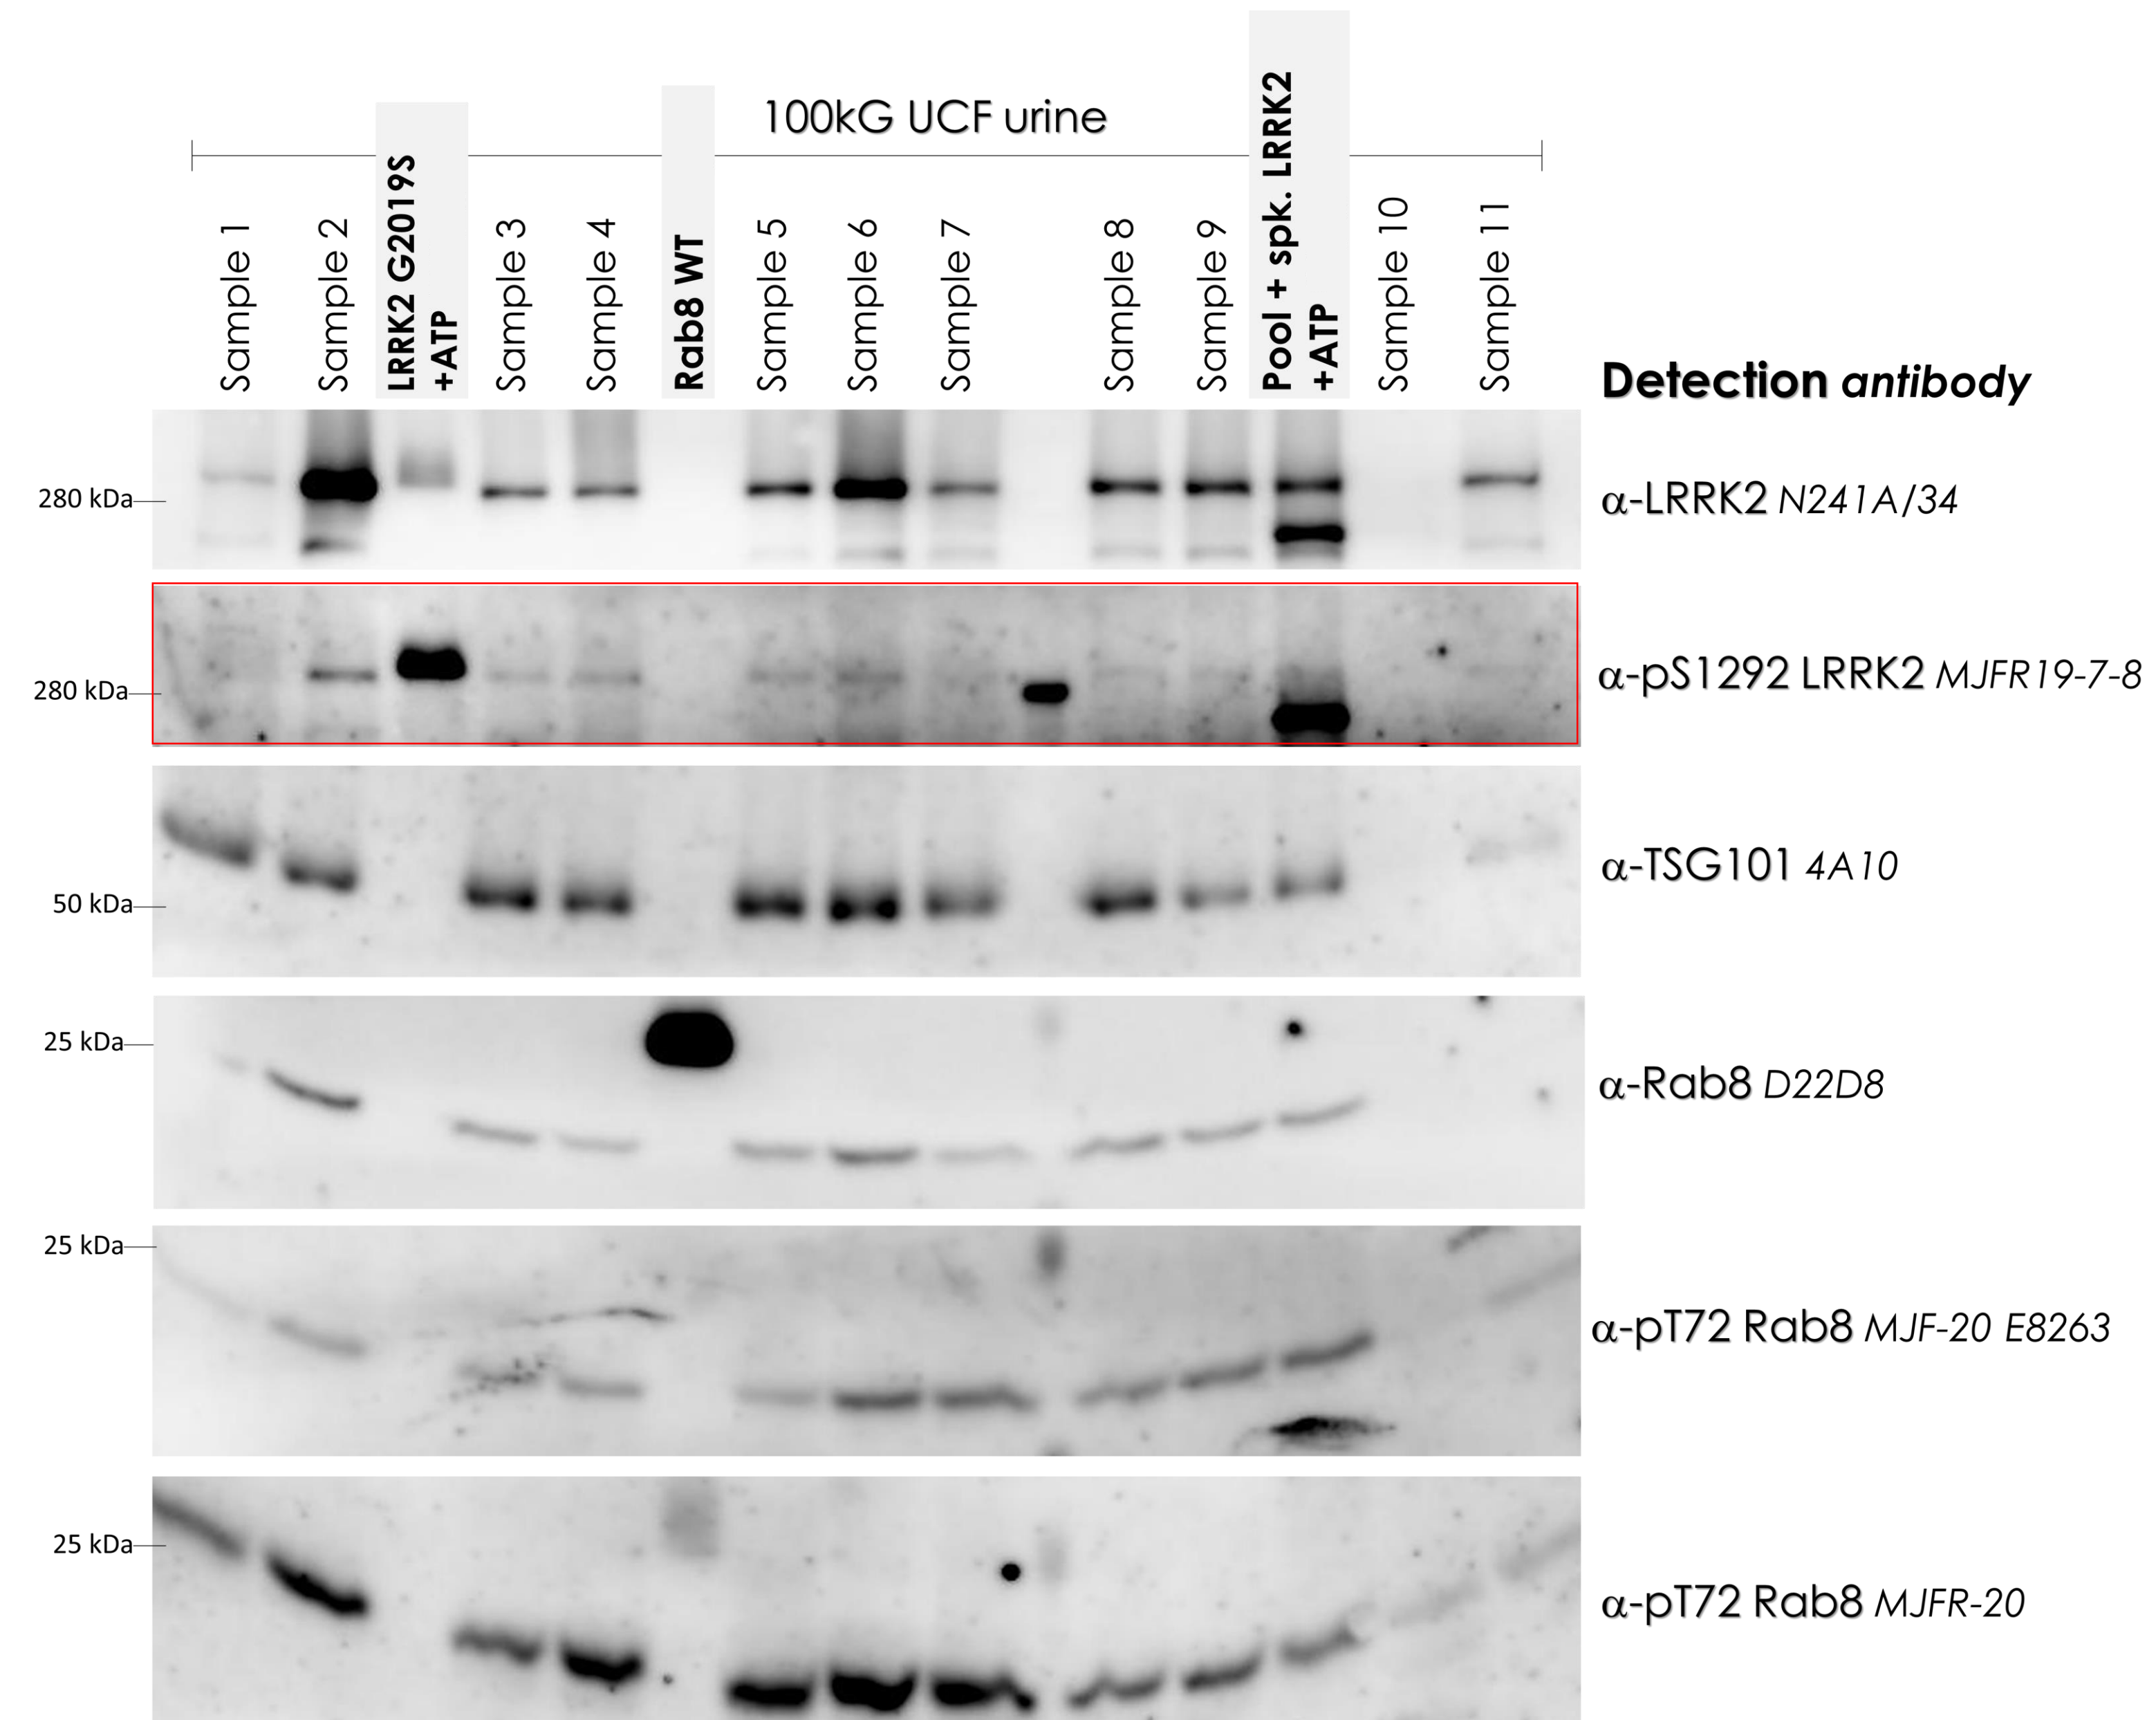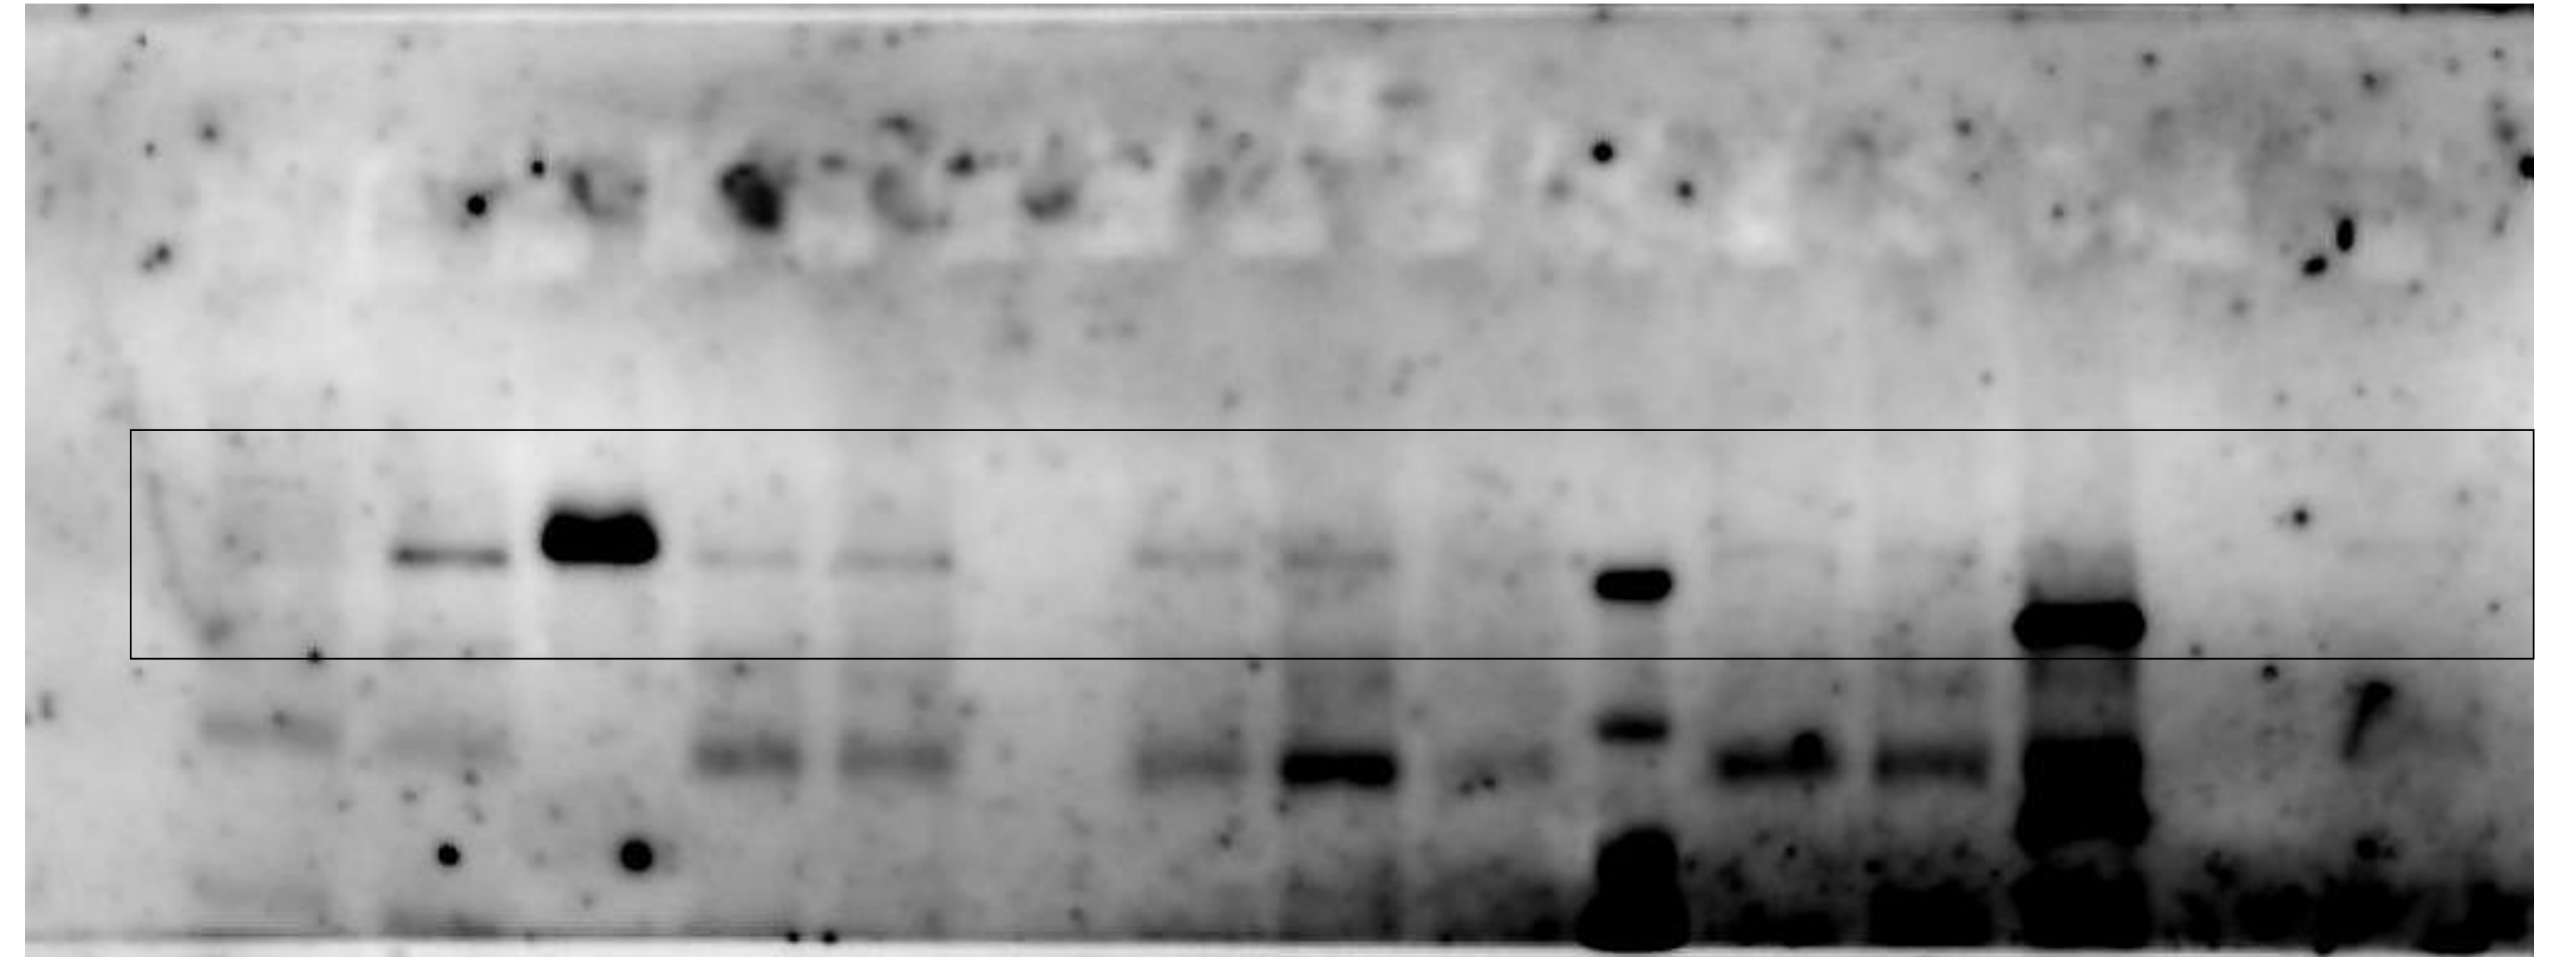

Suppl Figure 7

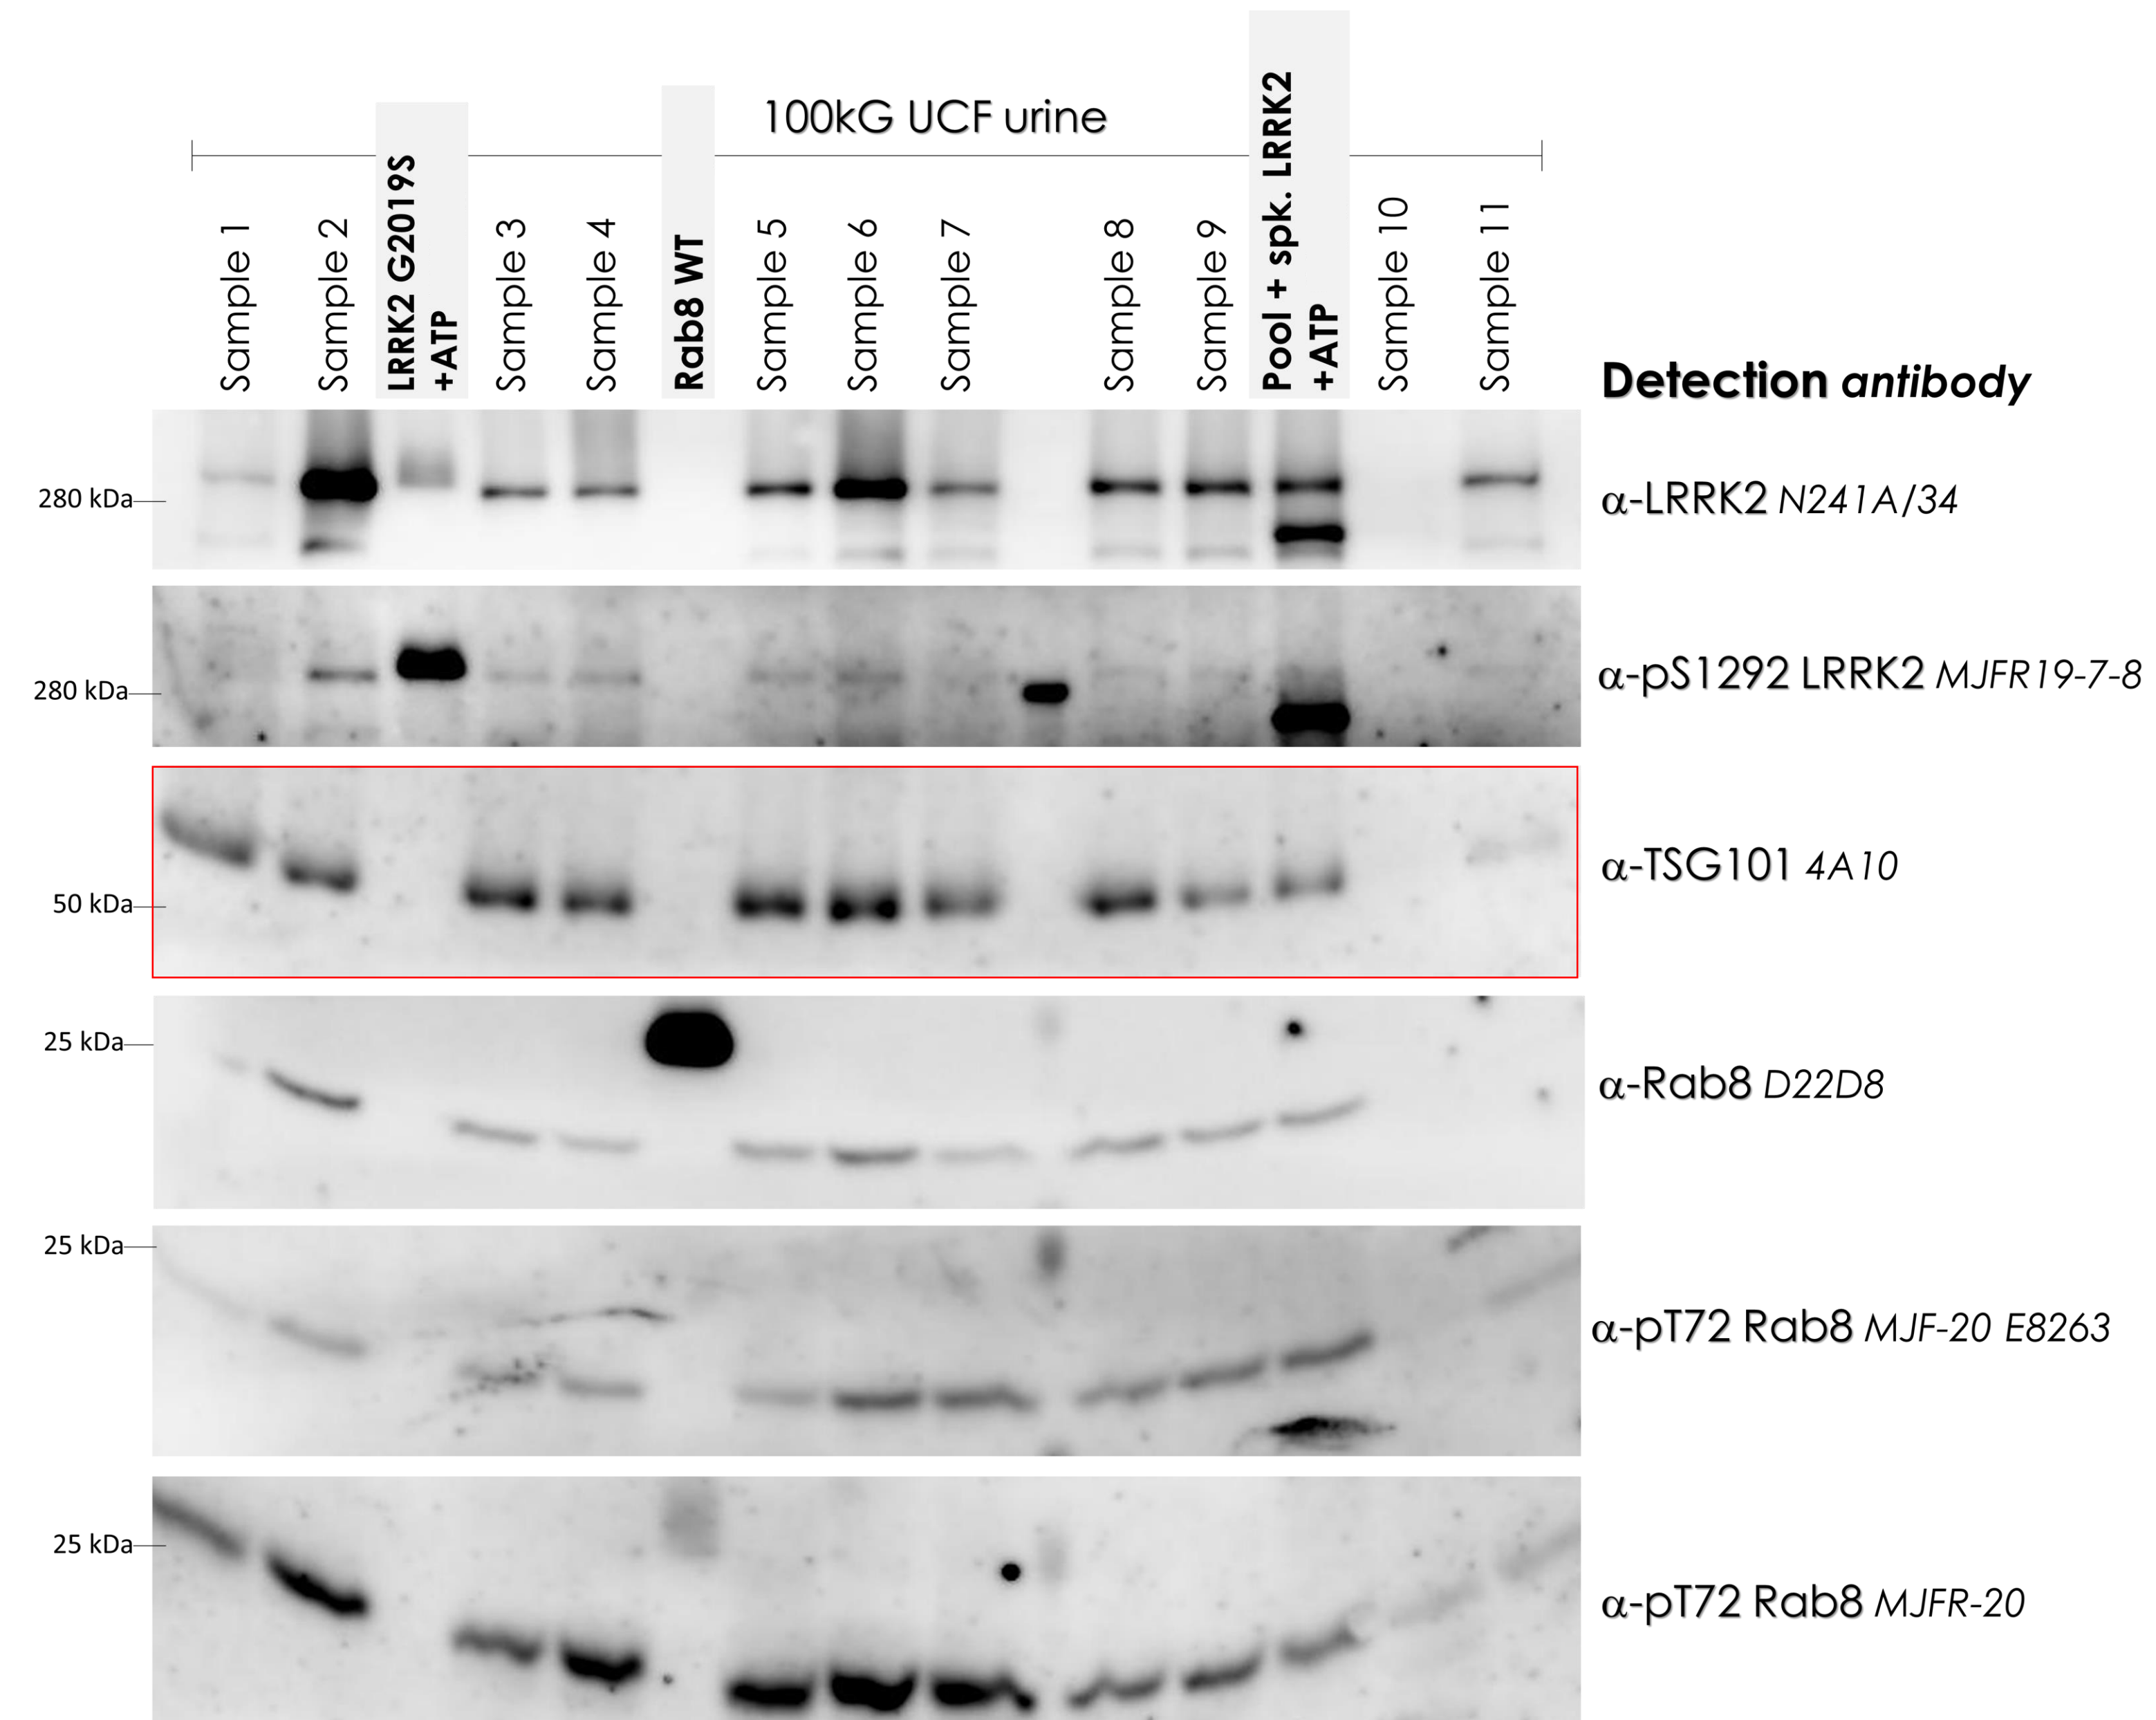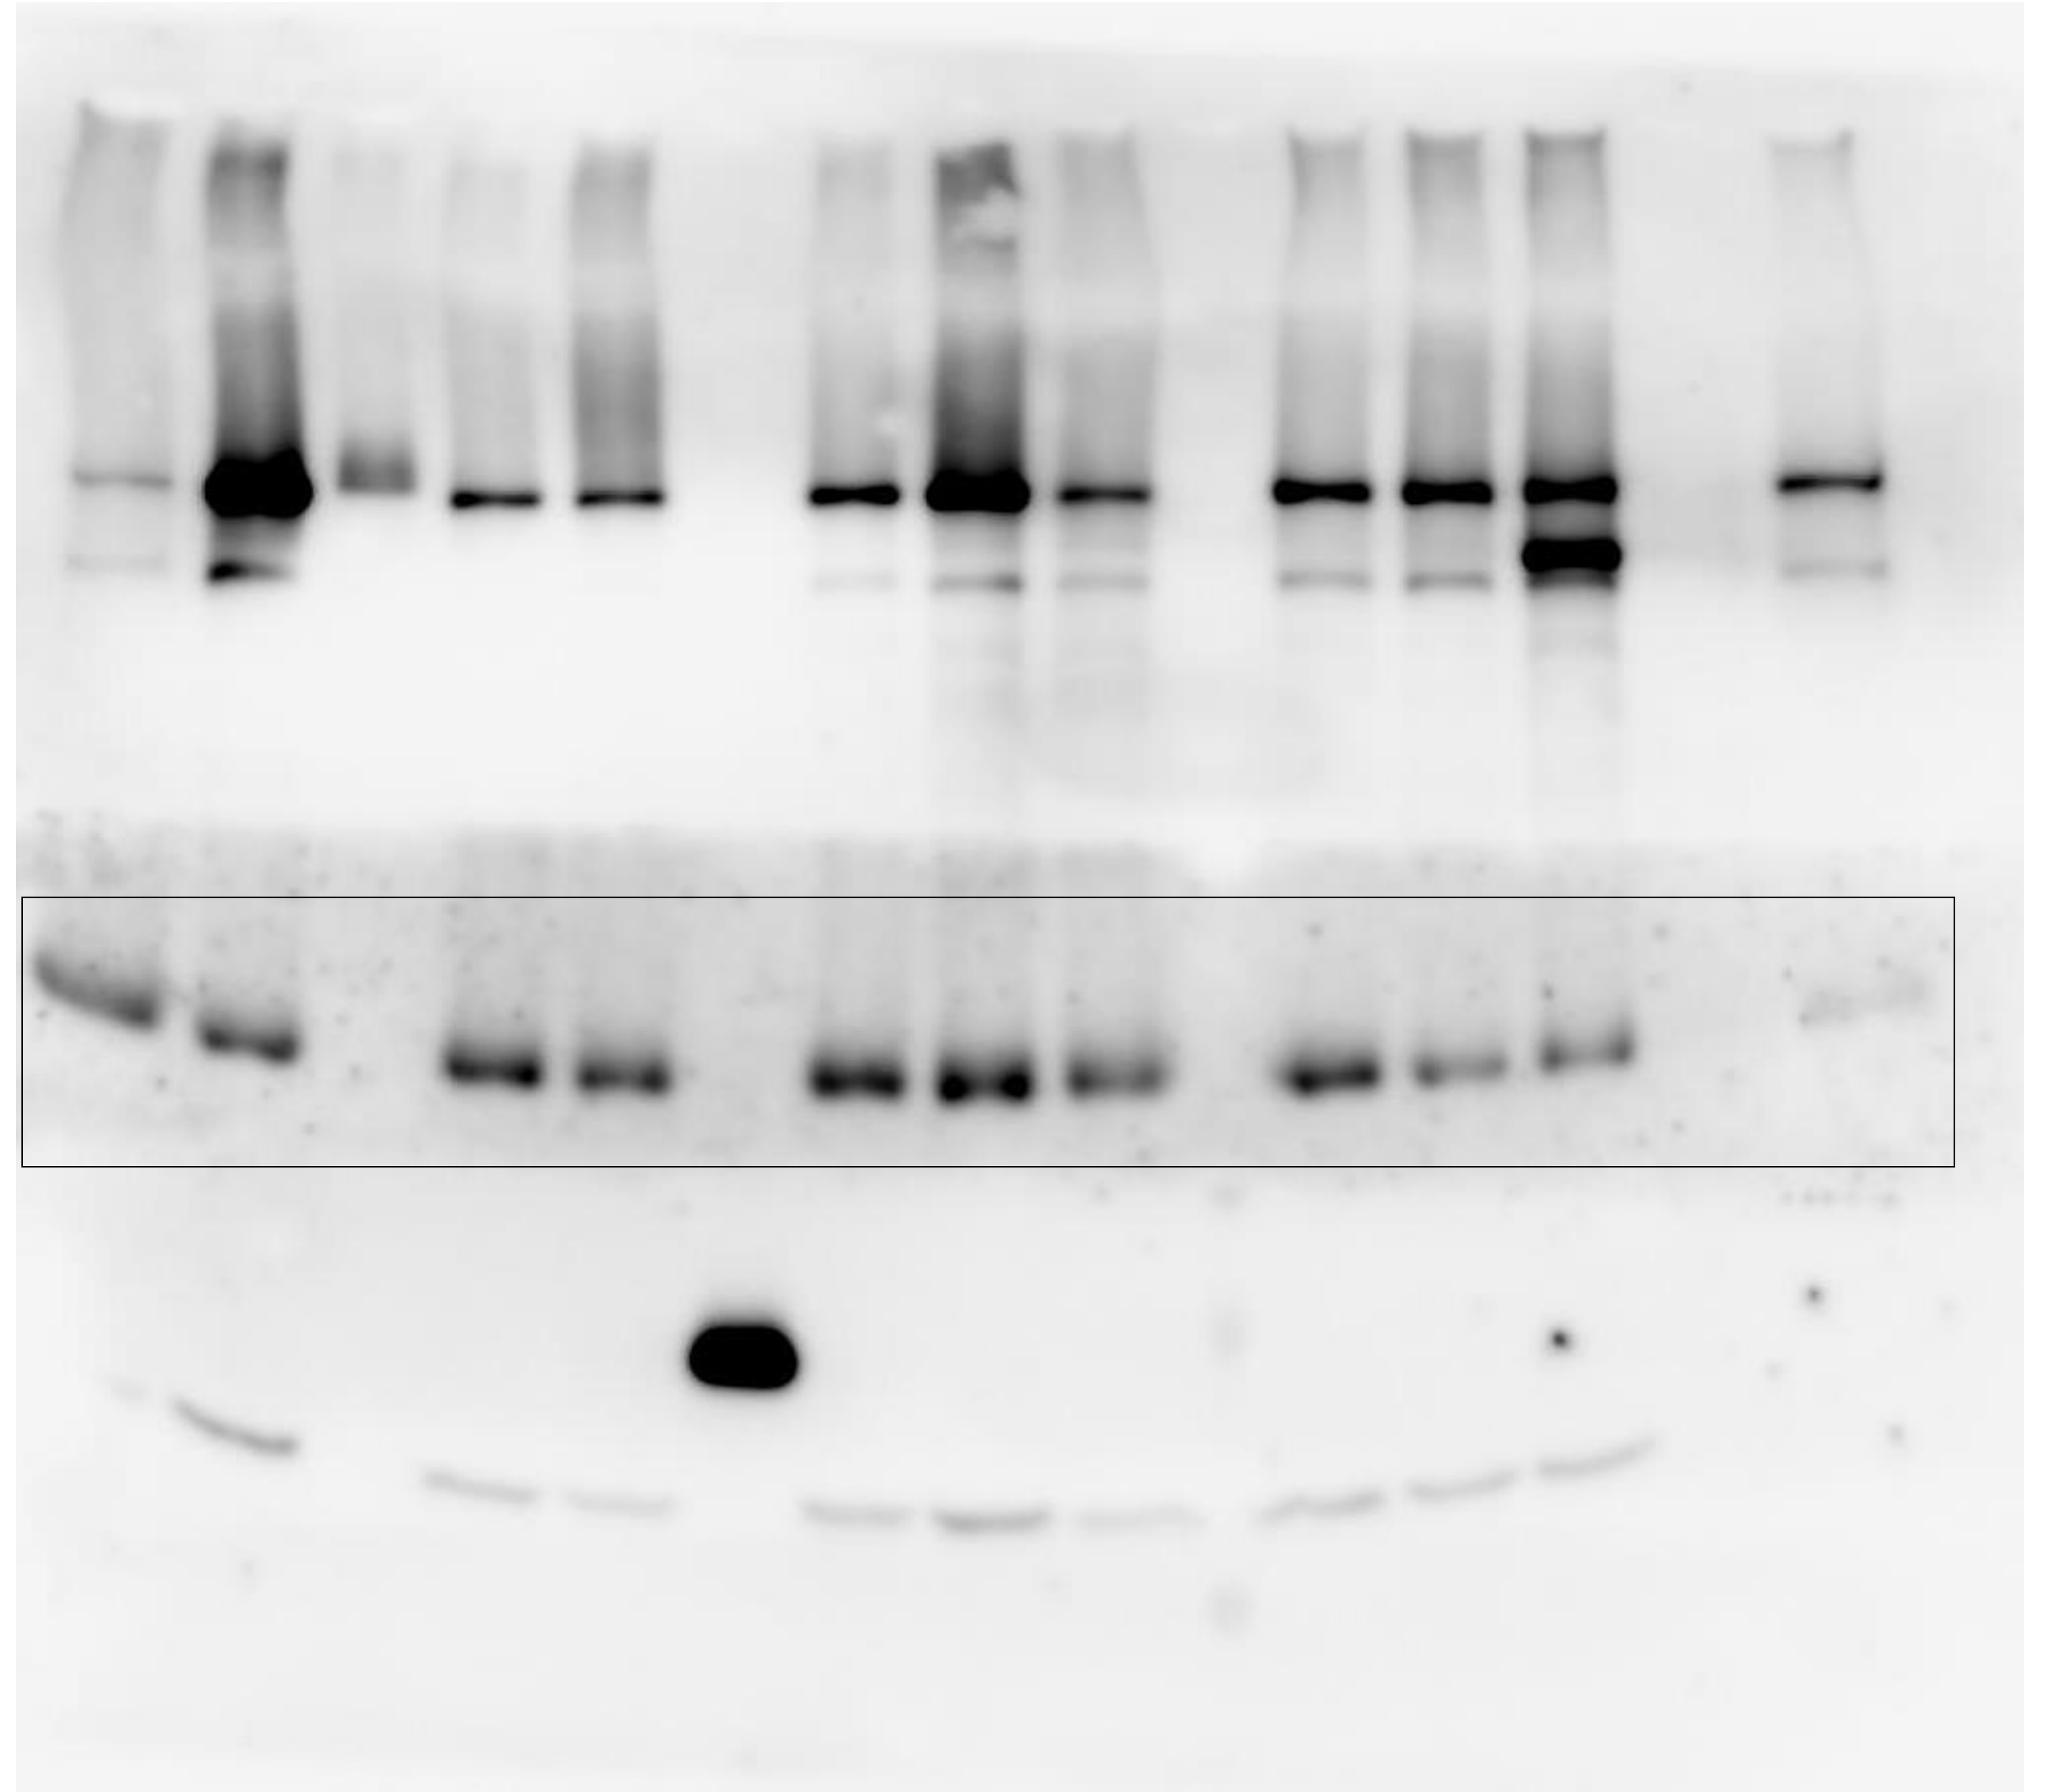

Suppl Figure 7

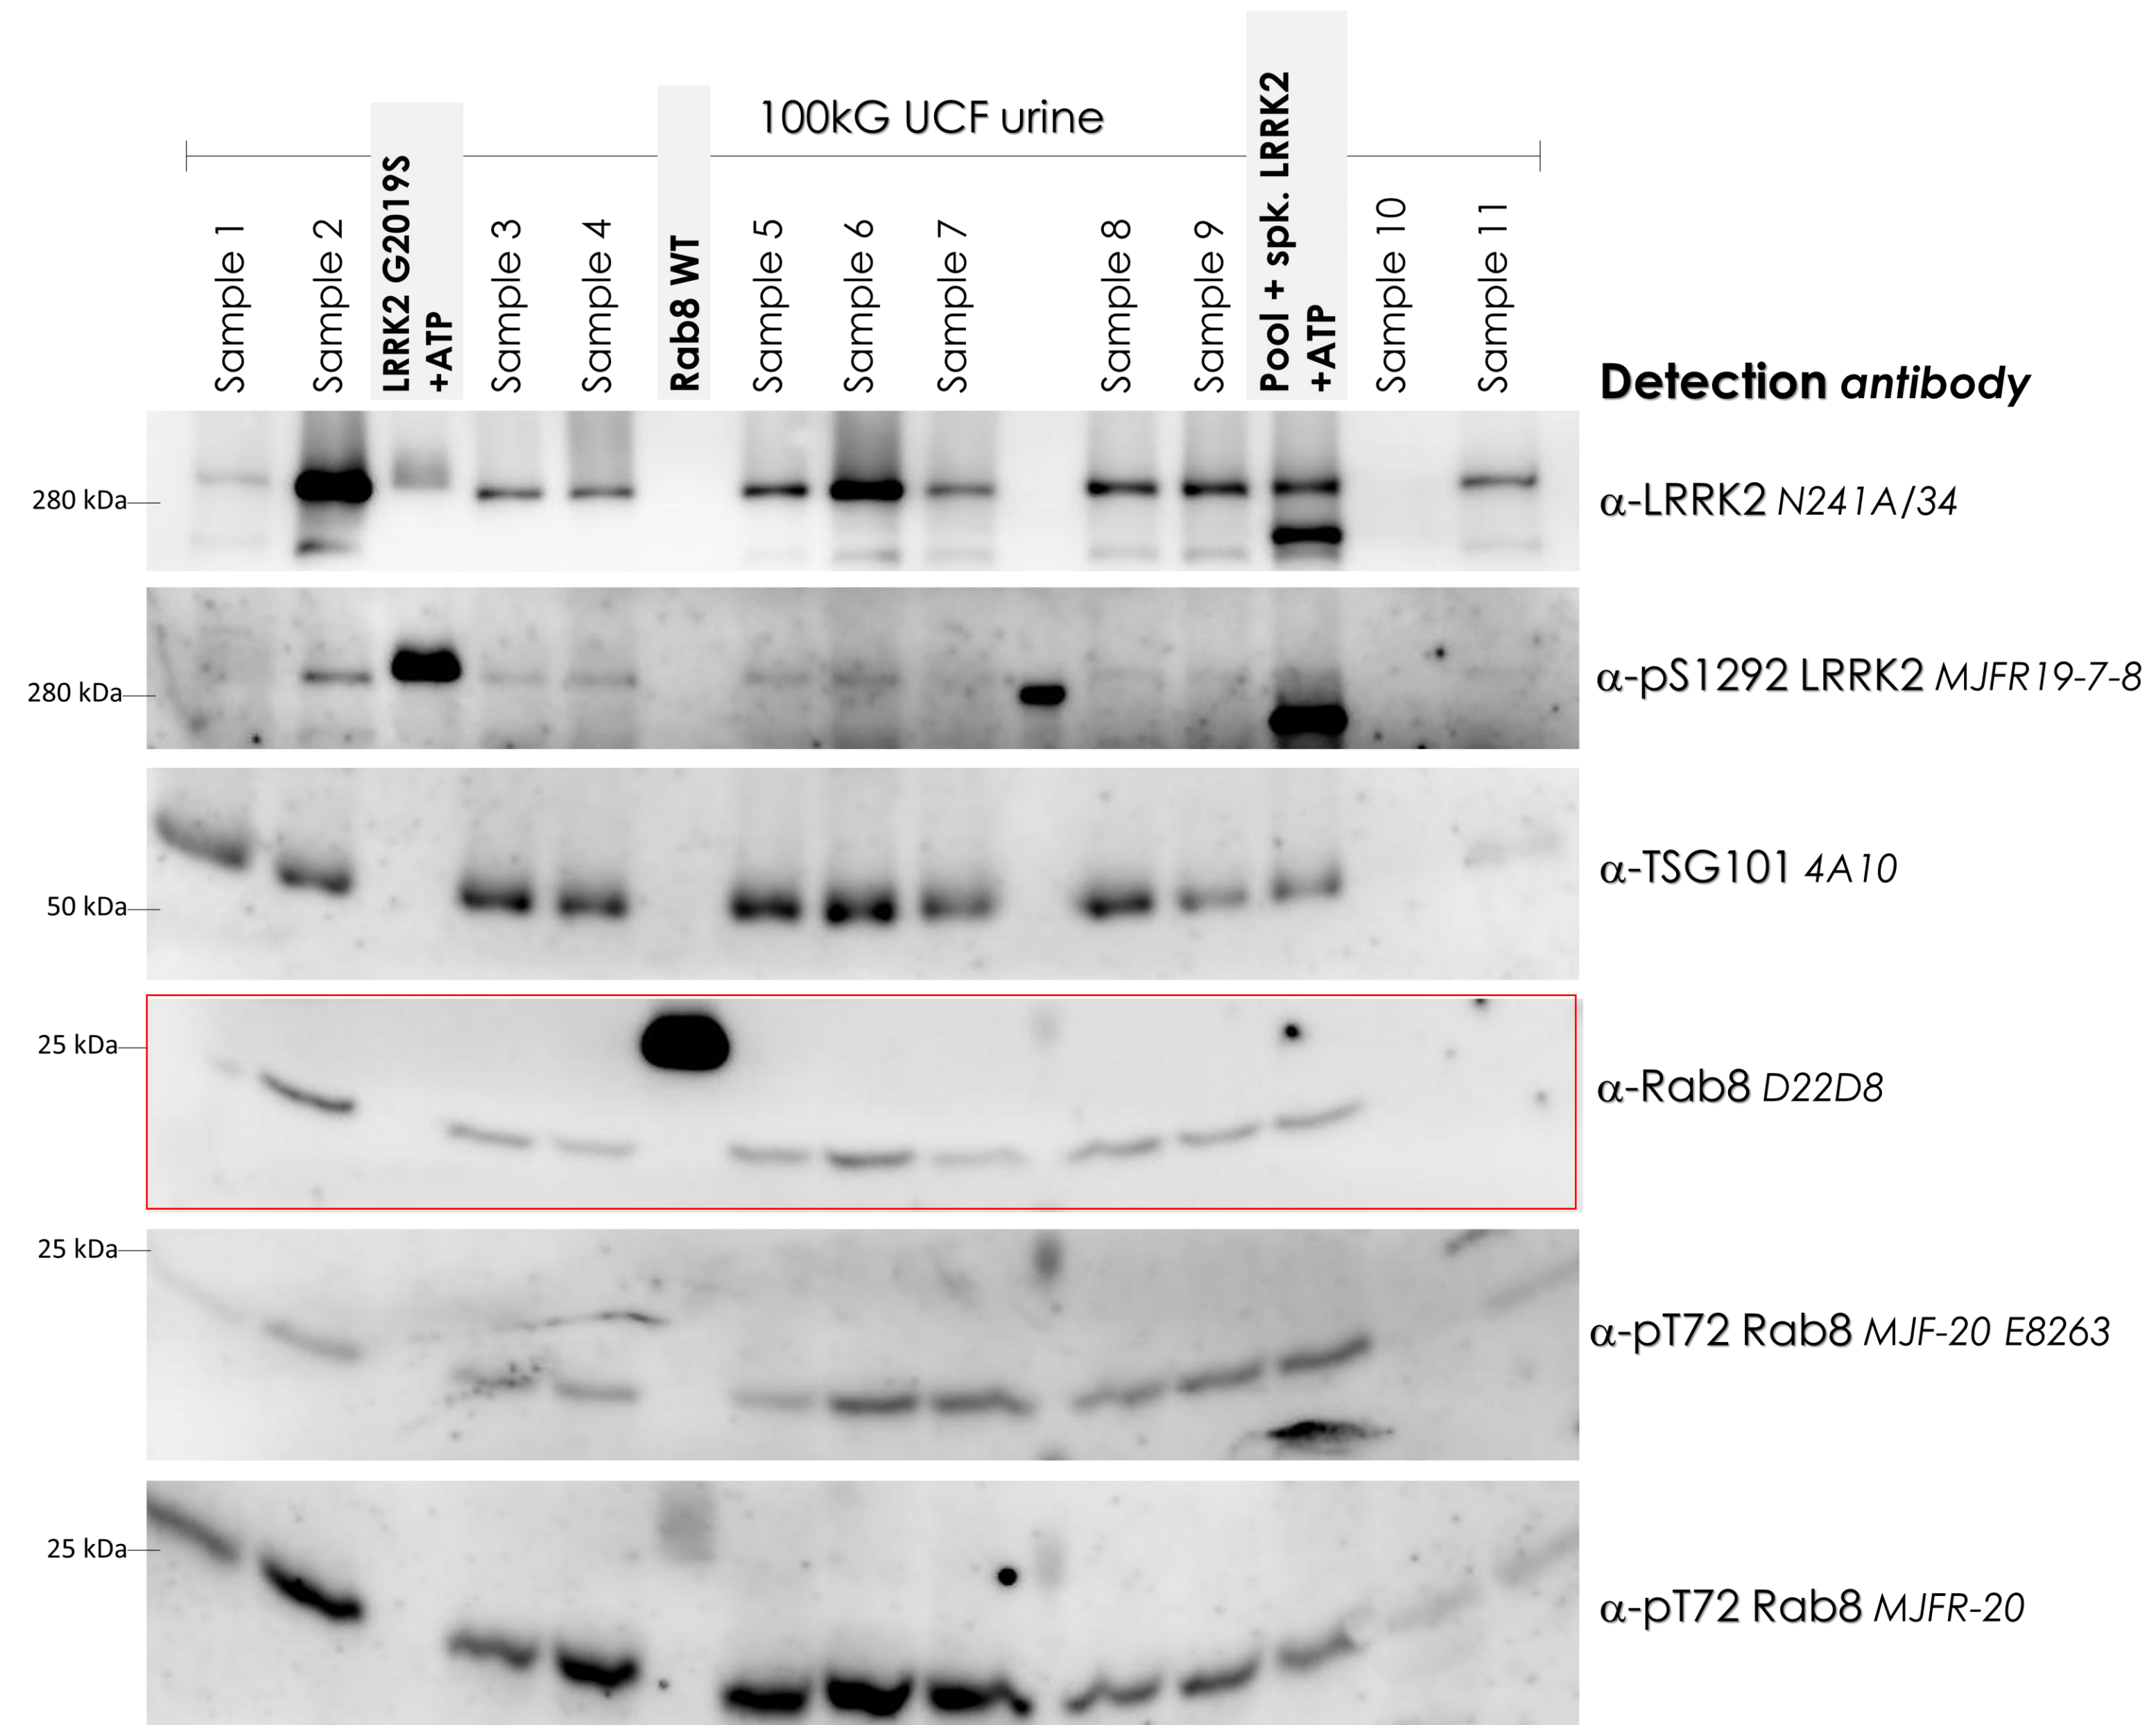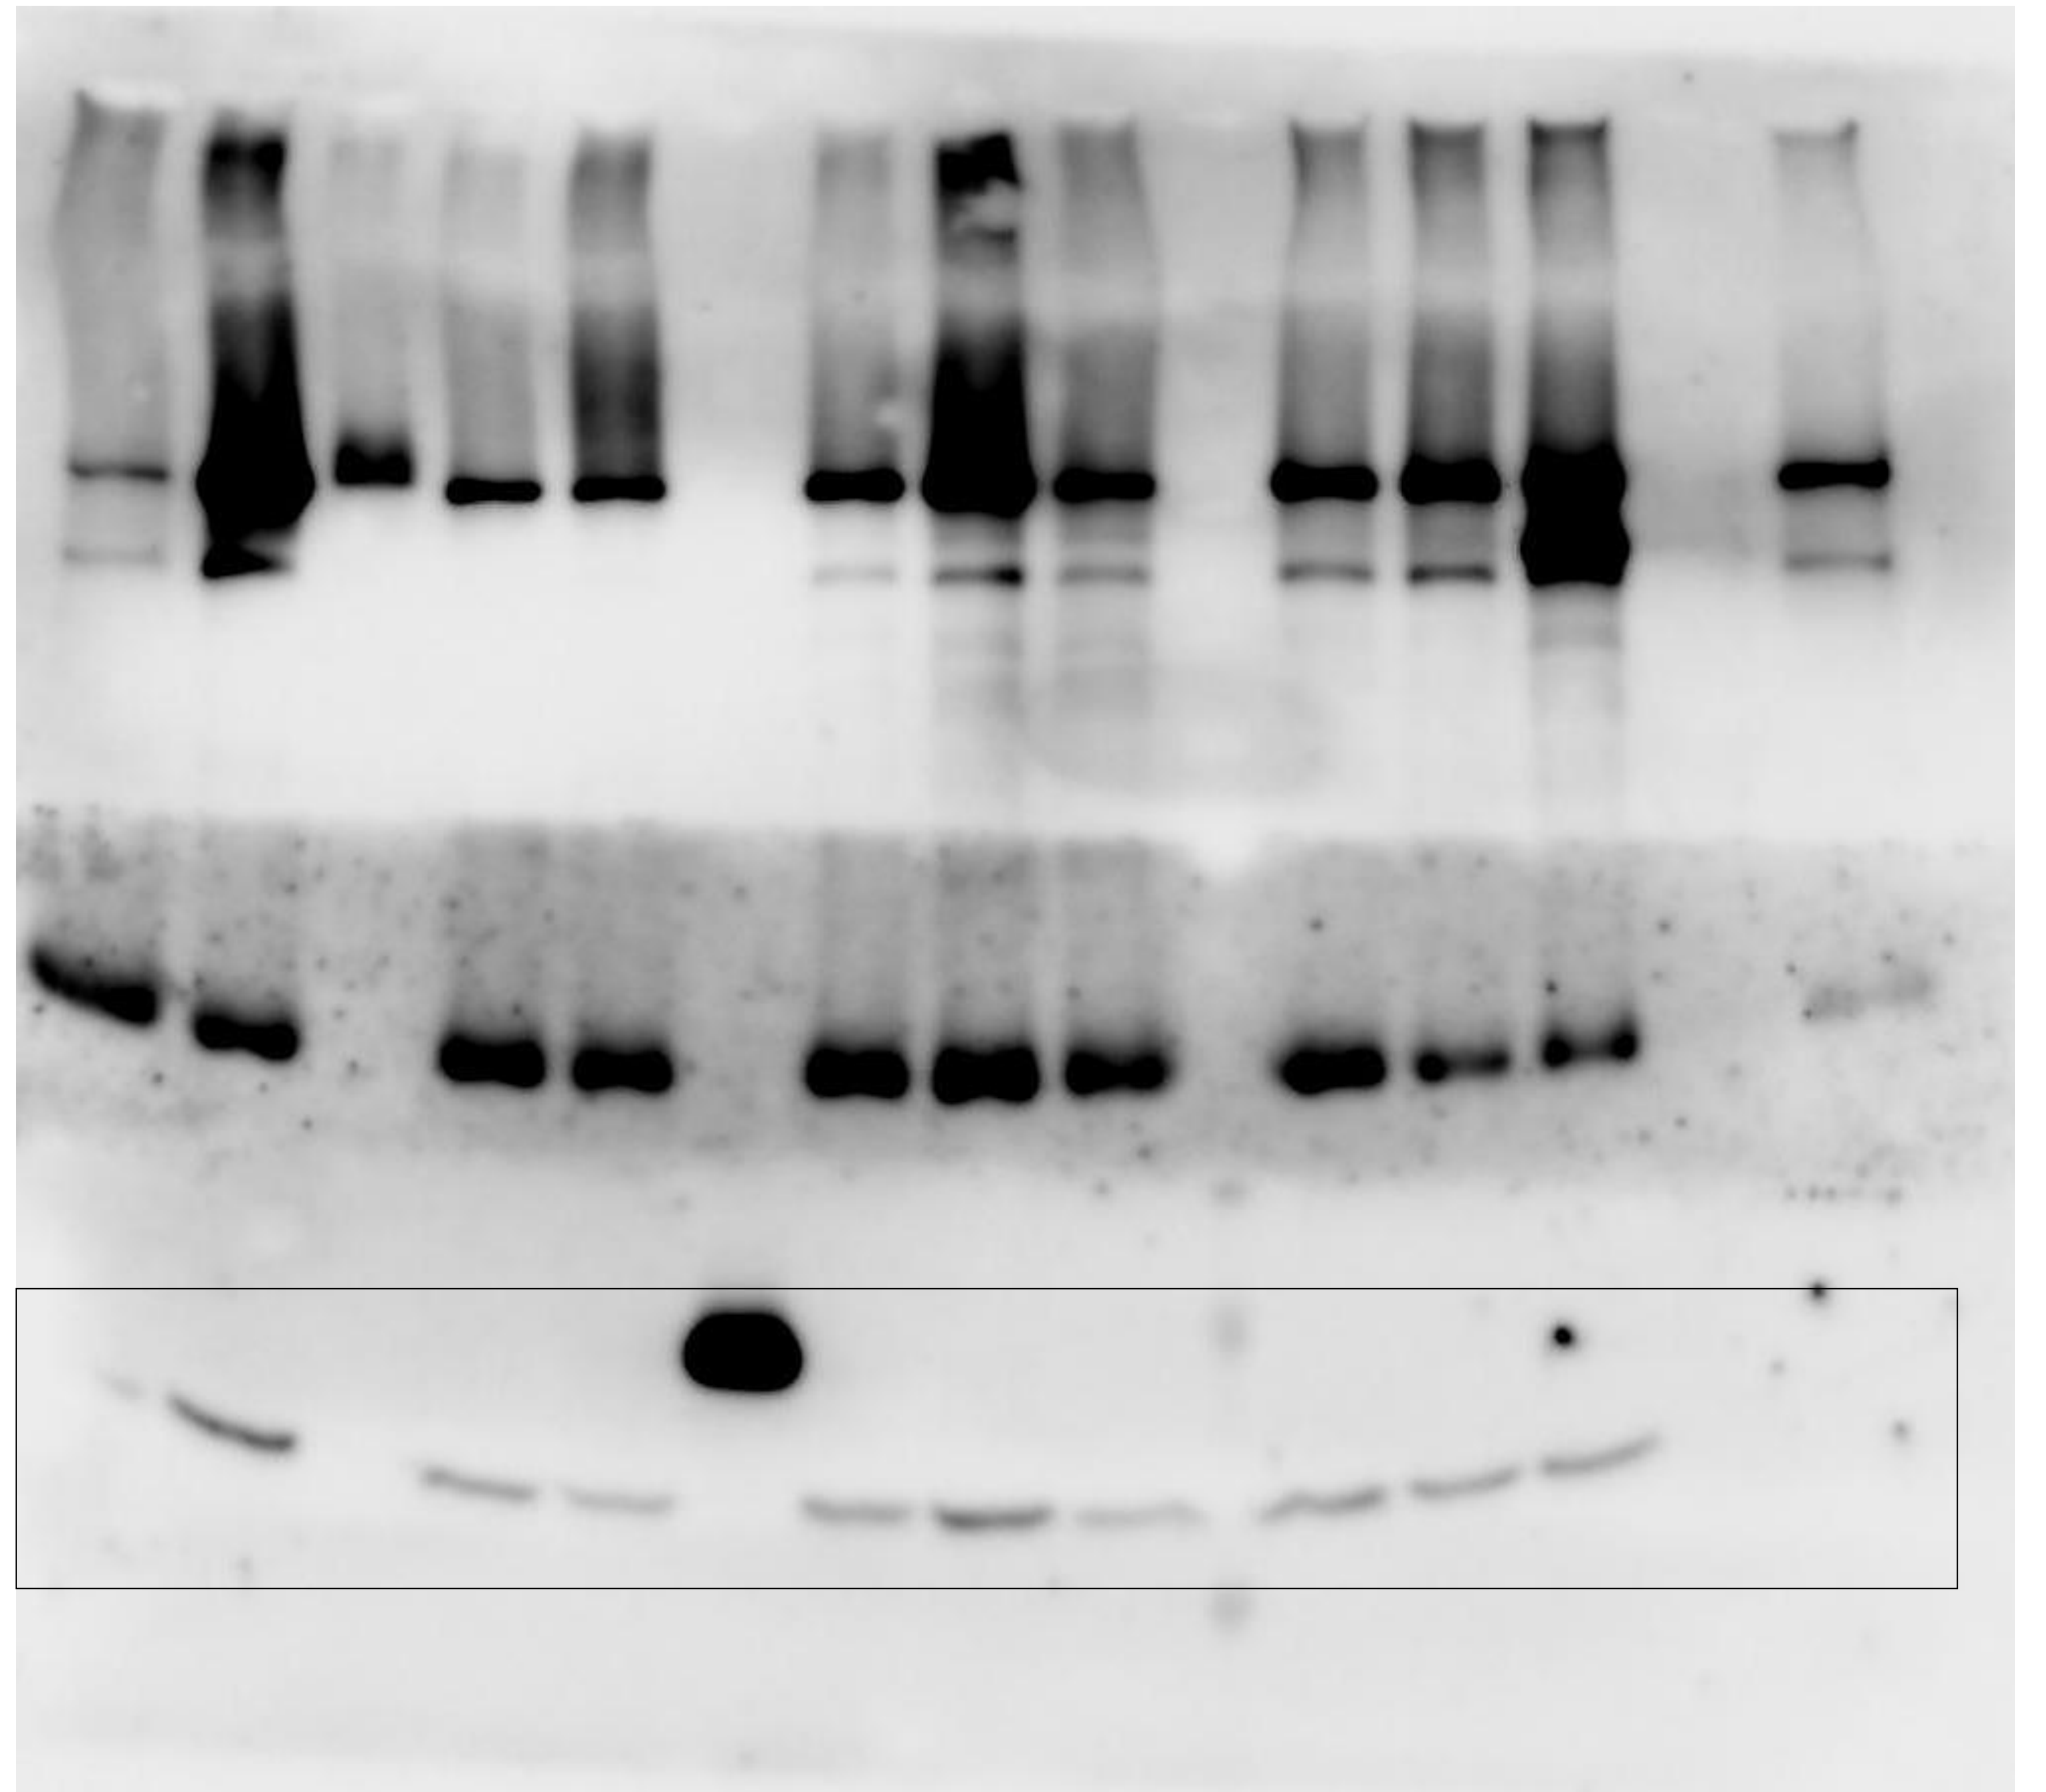

Suppl Figure 7

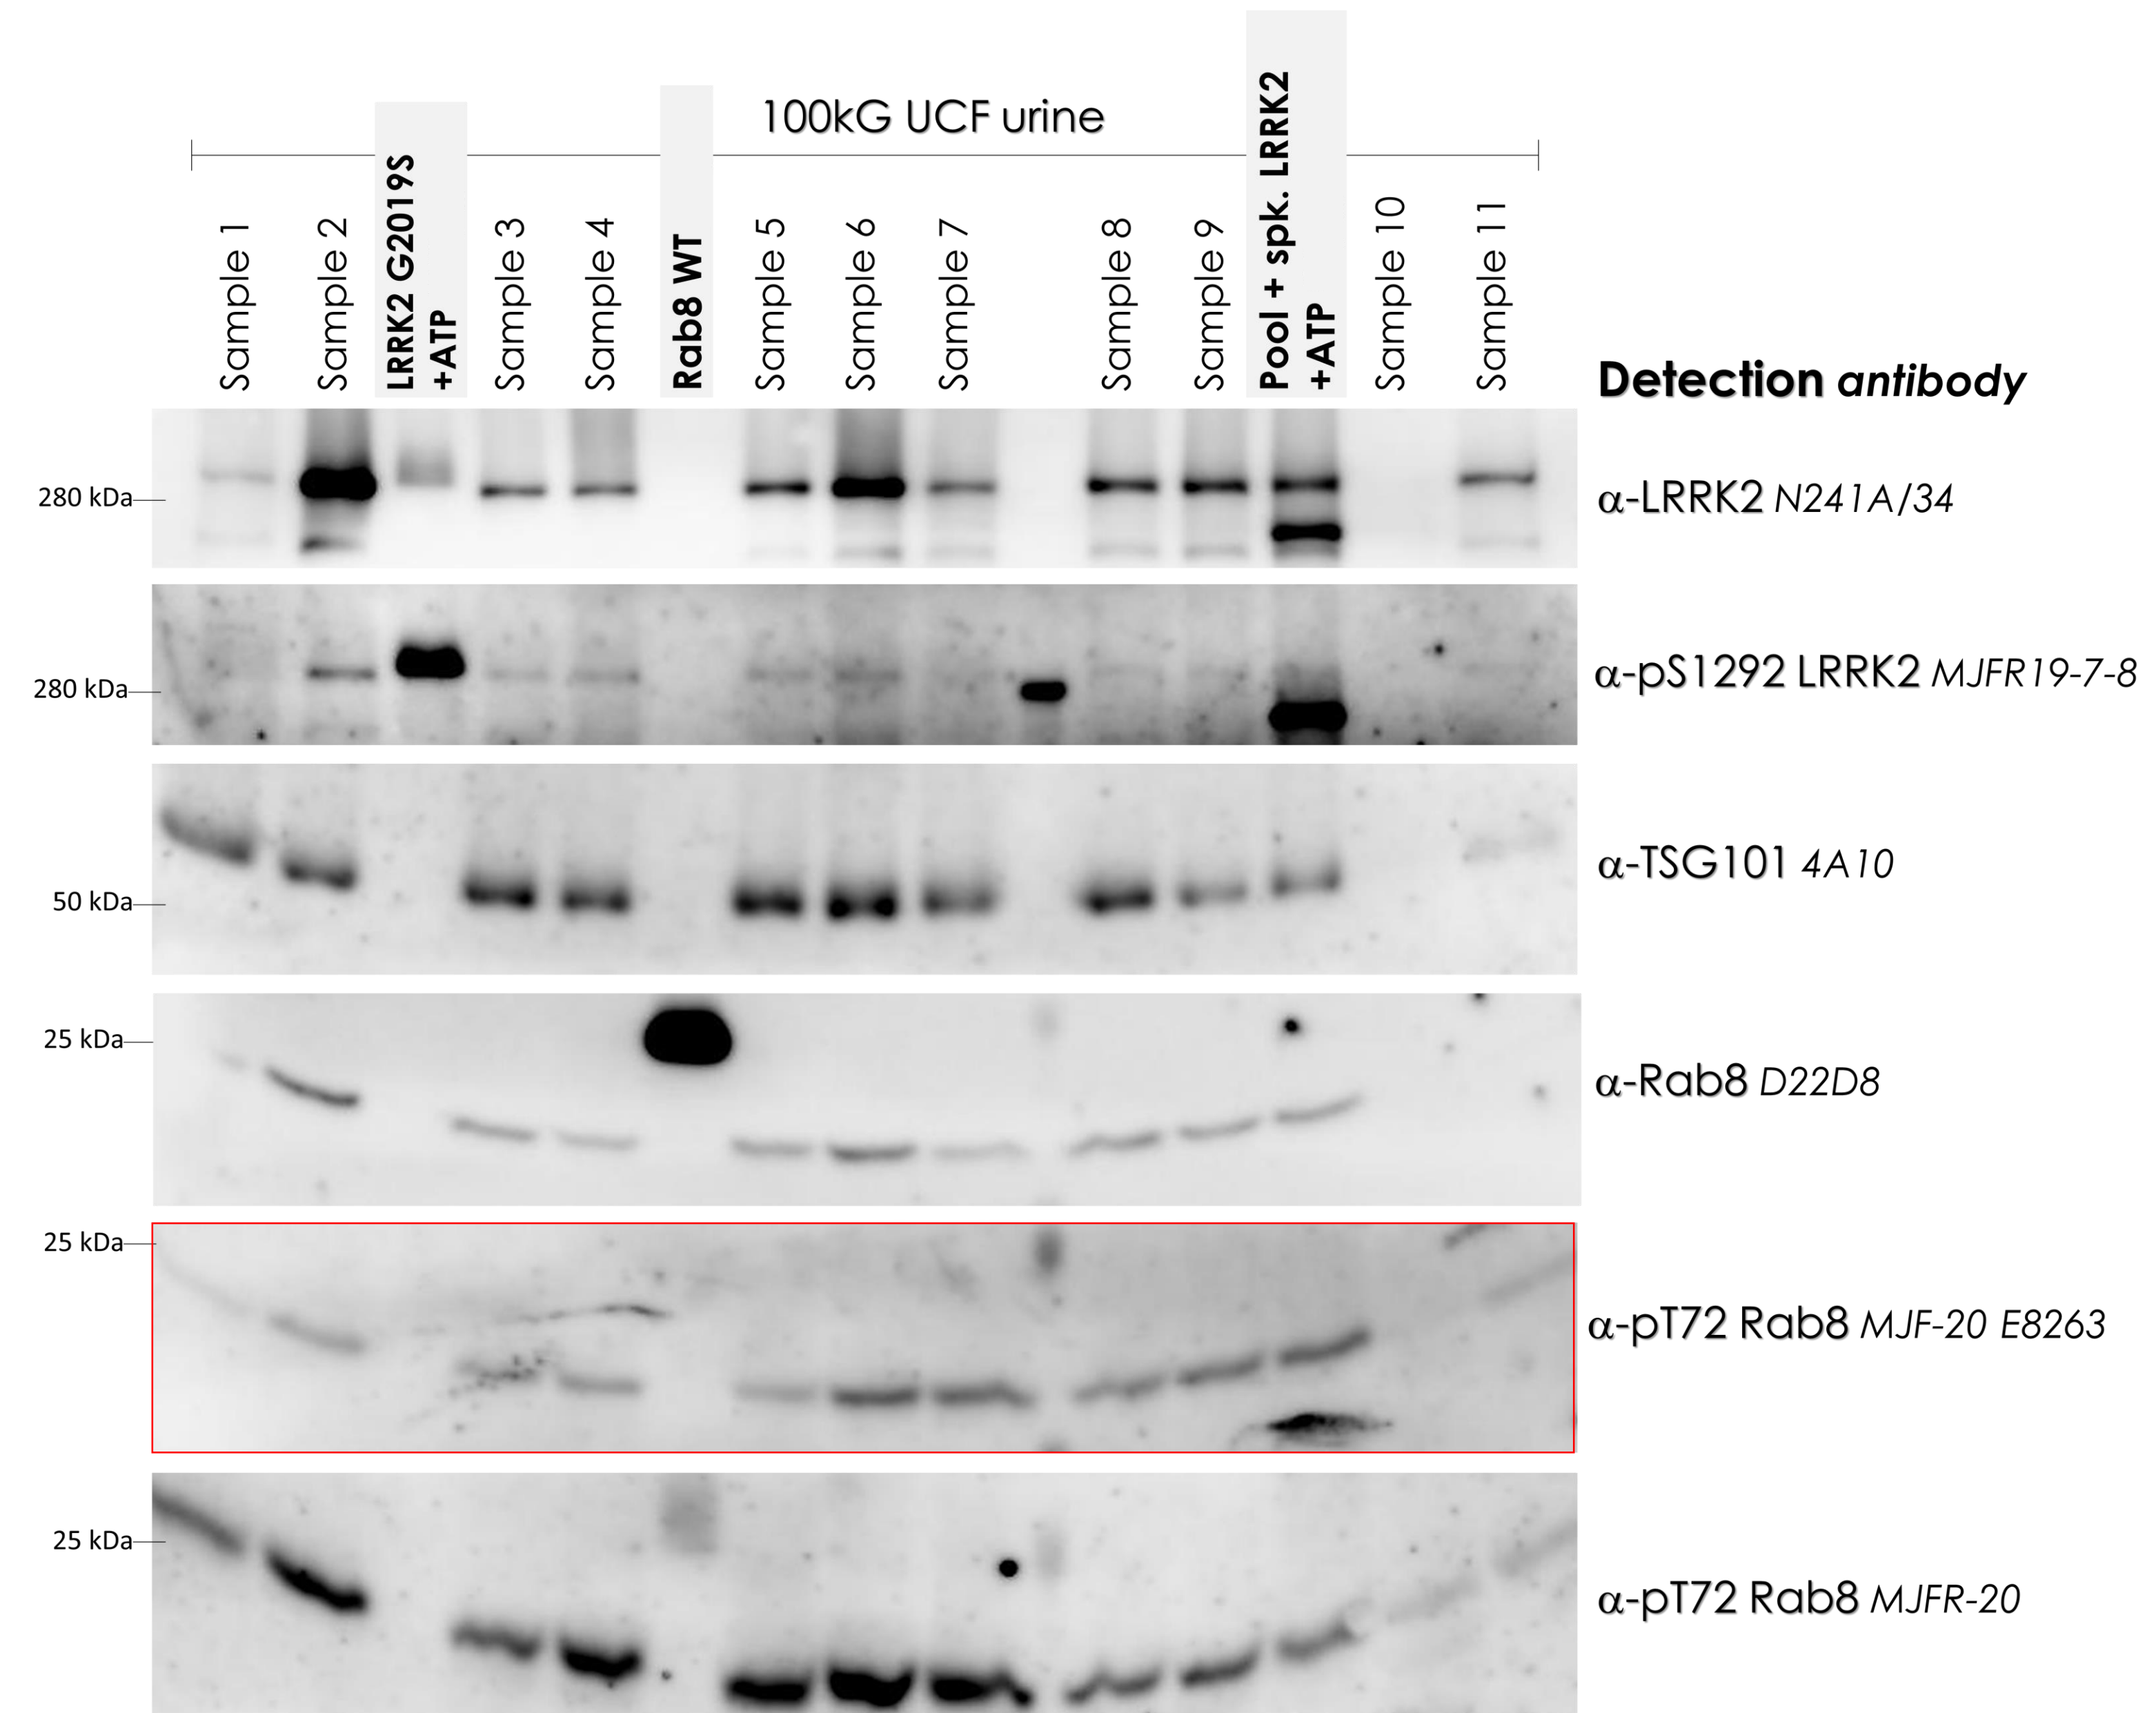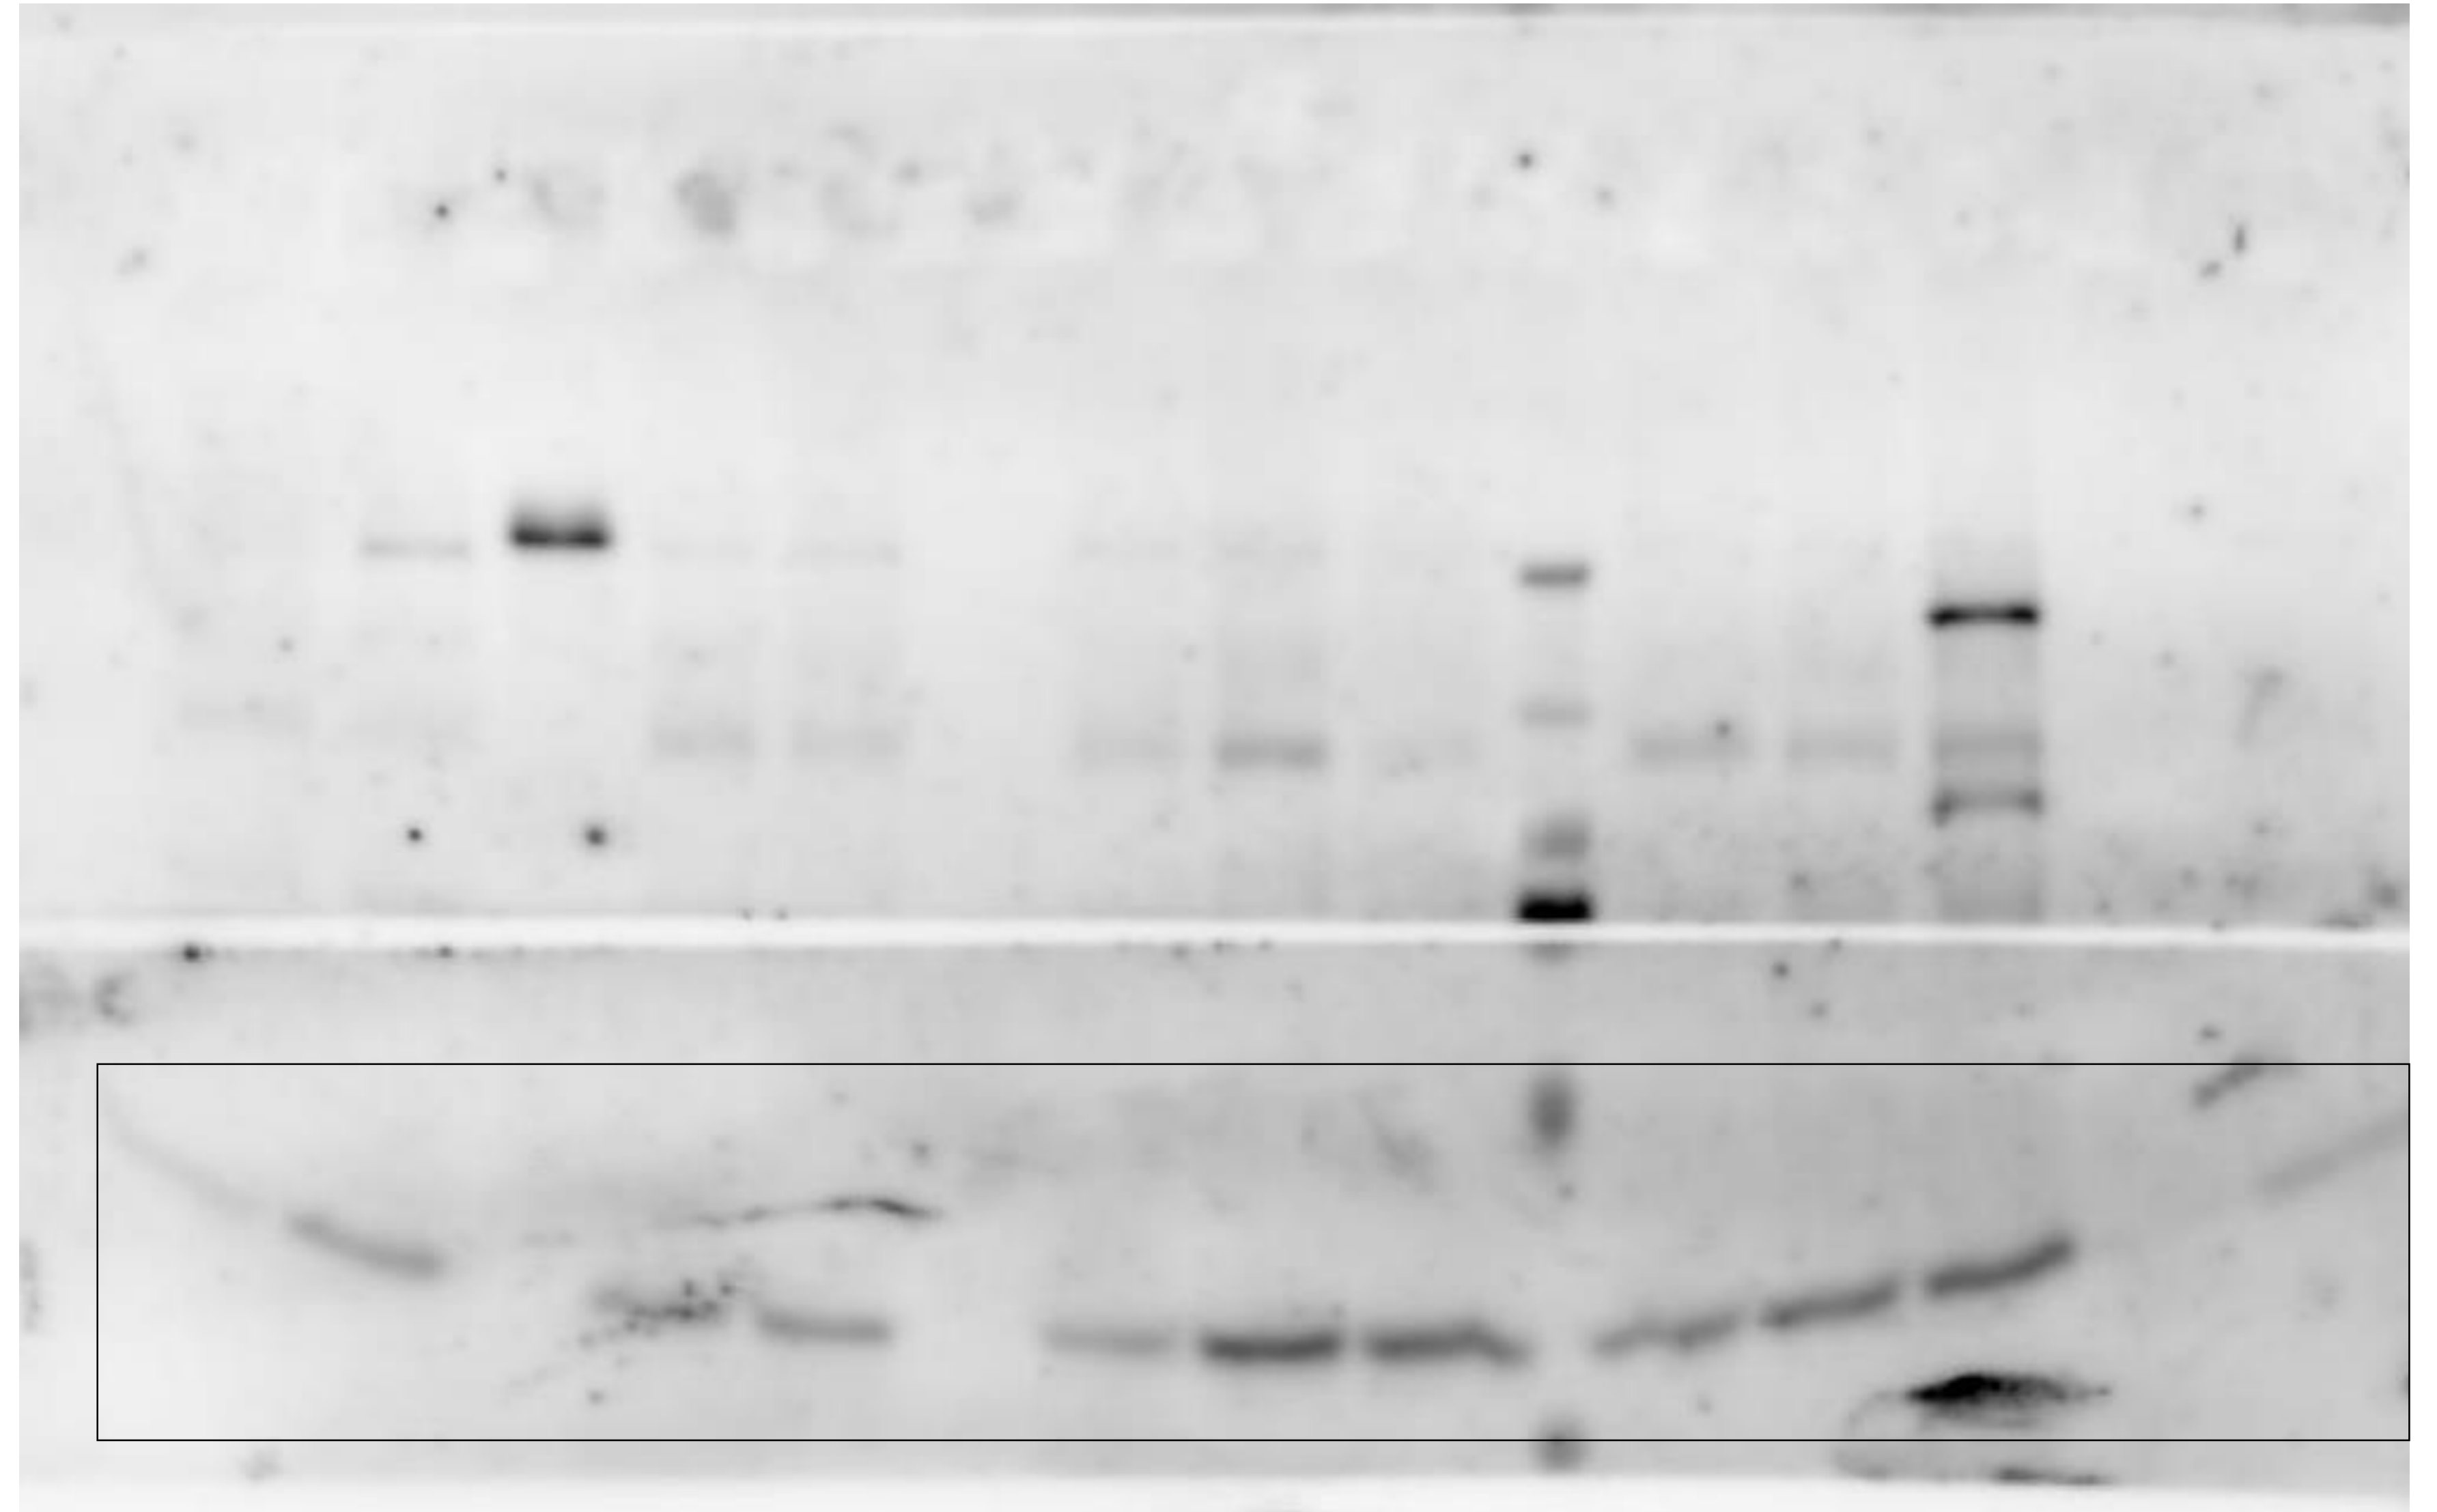



Suppl Figure 7

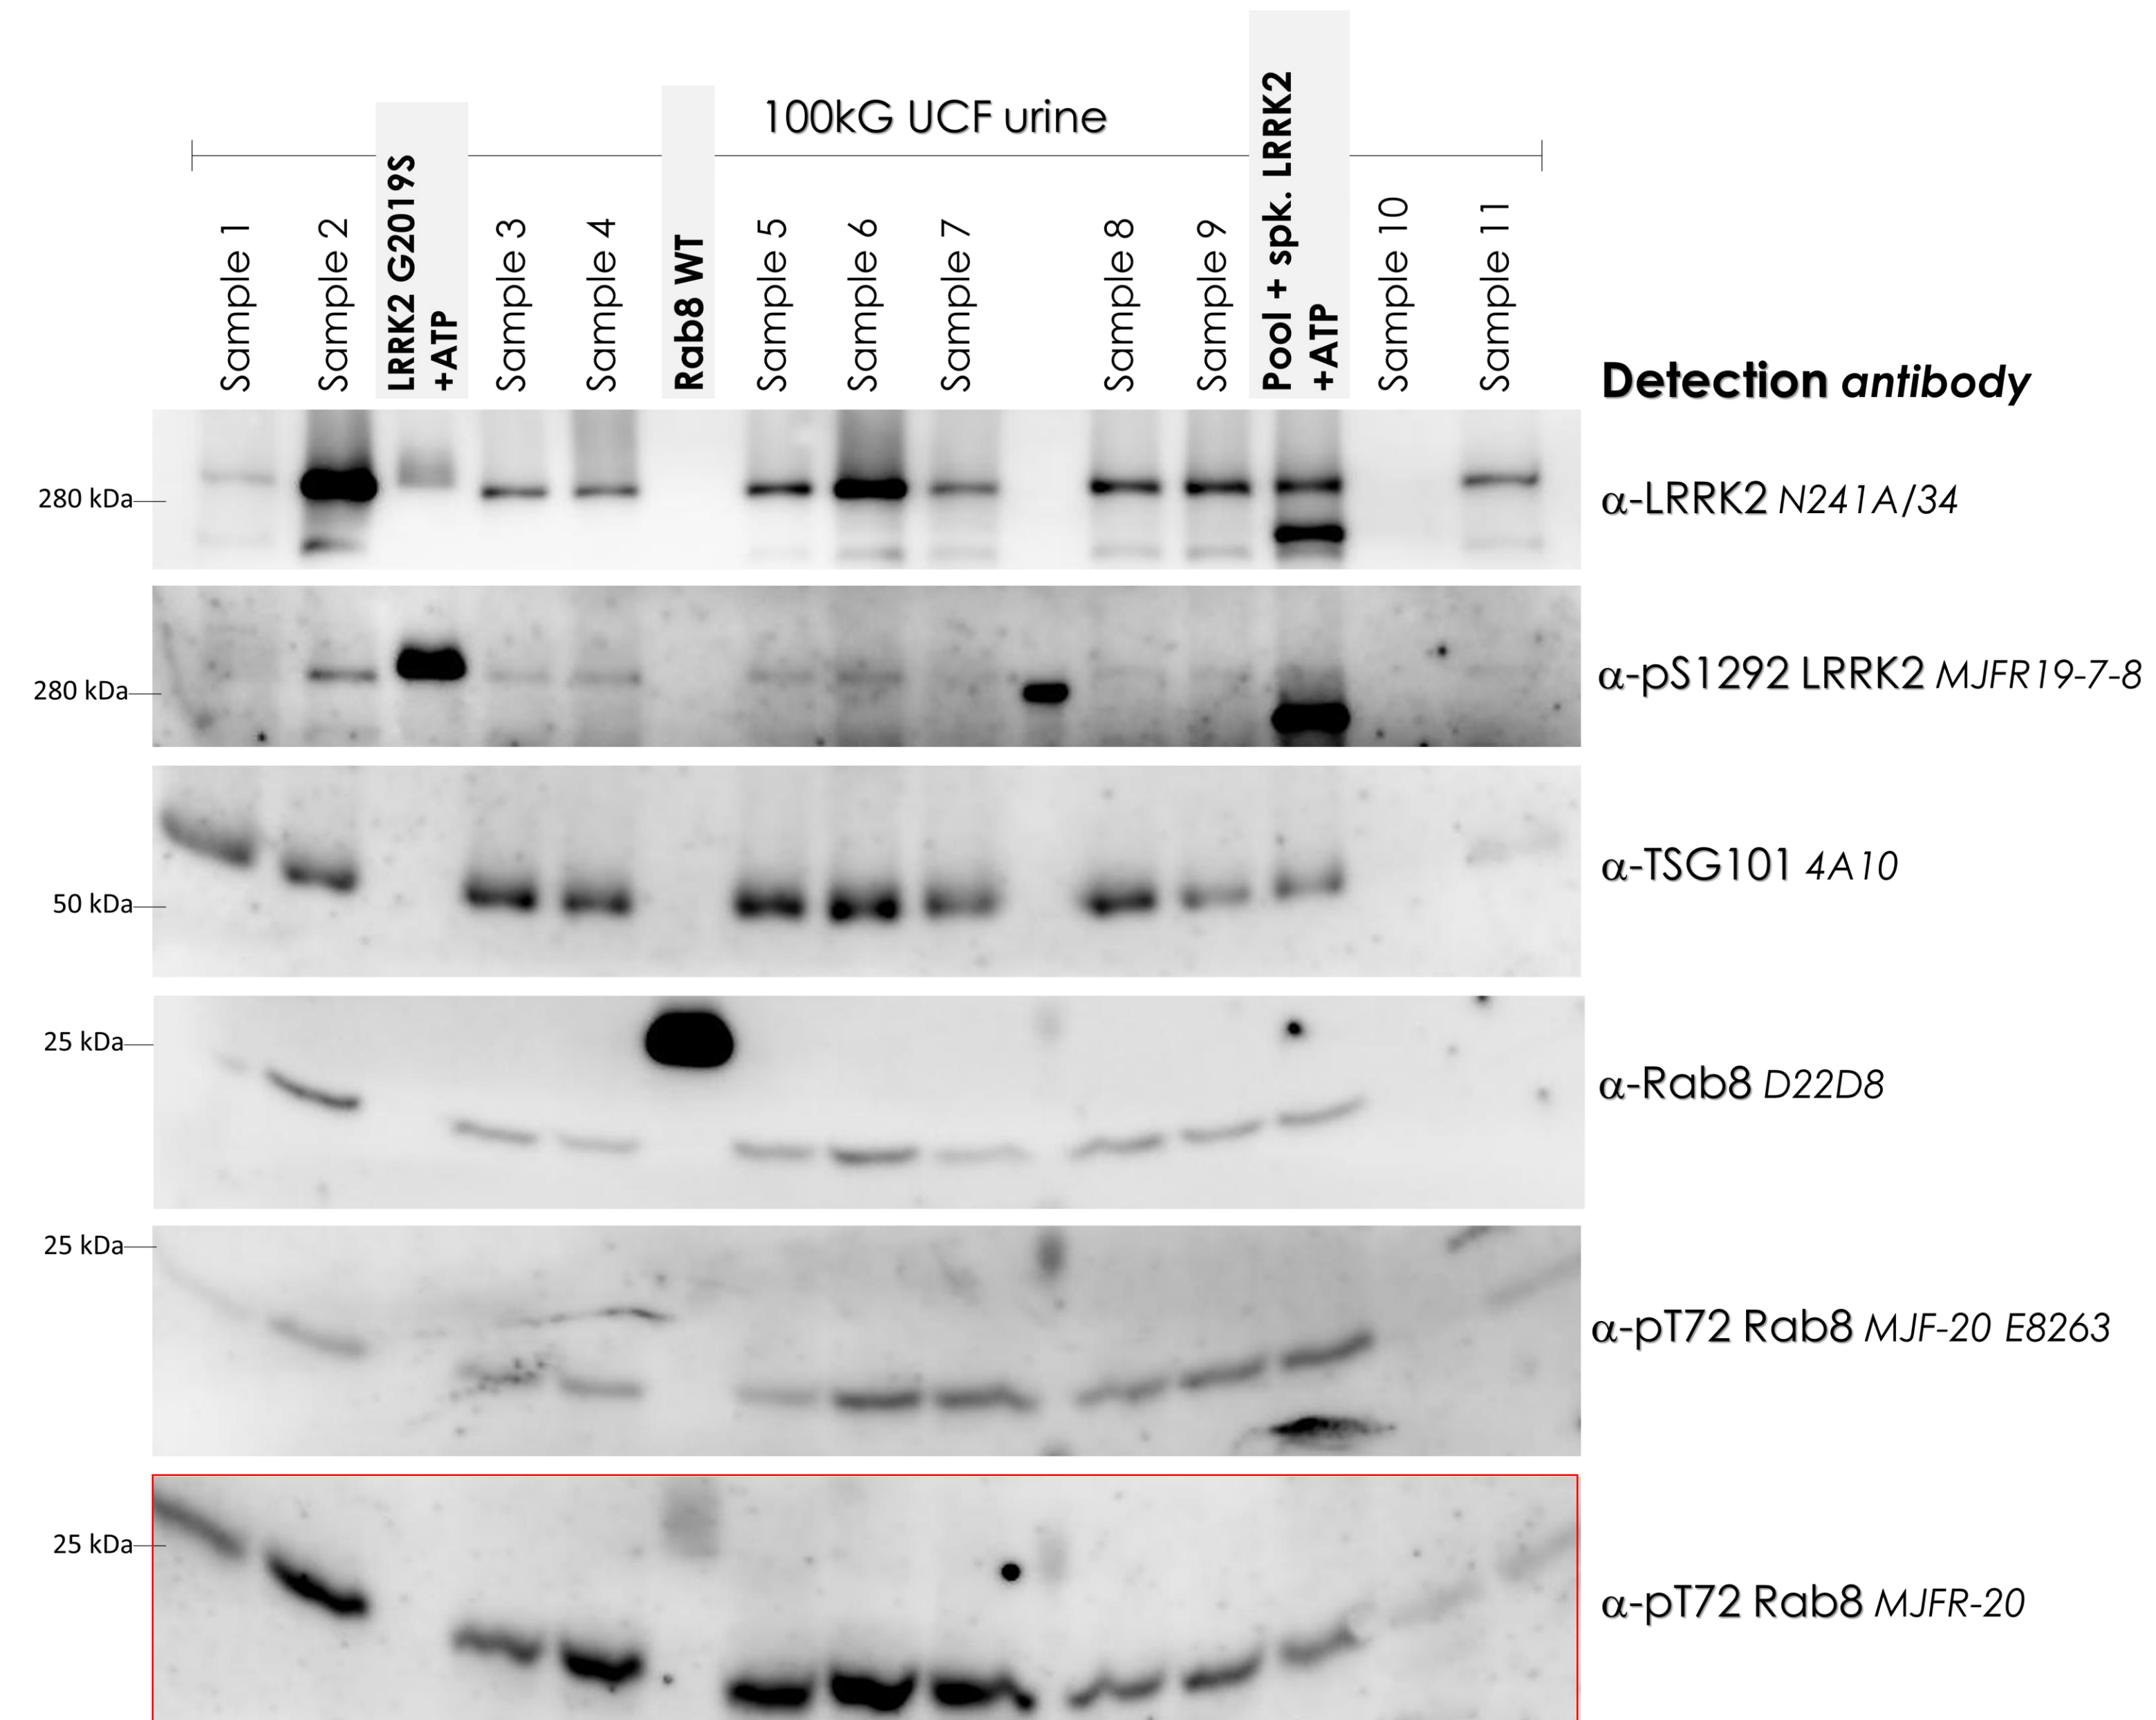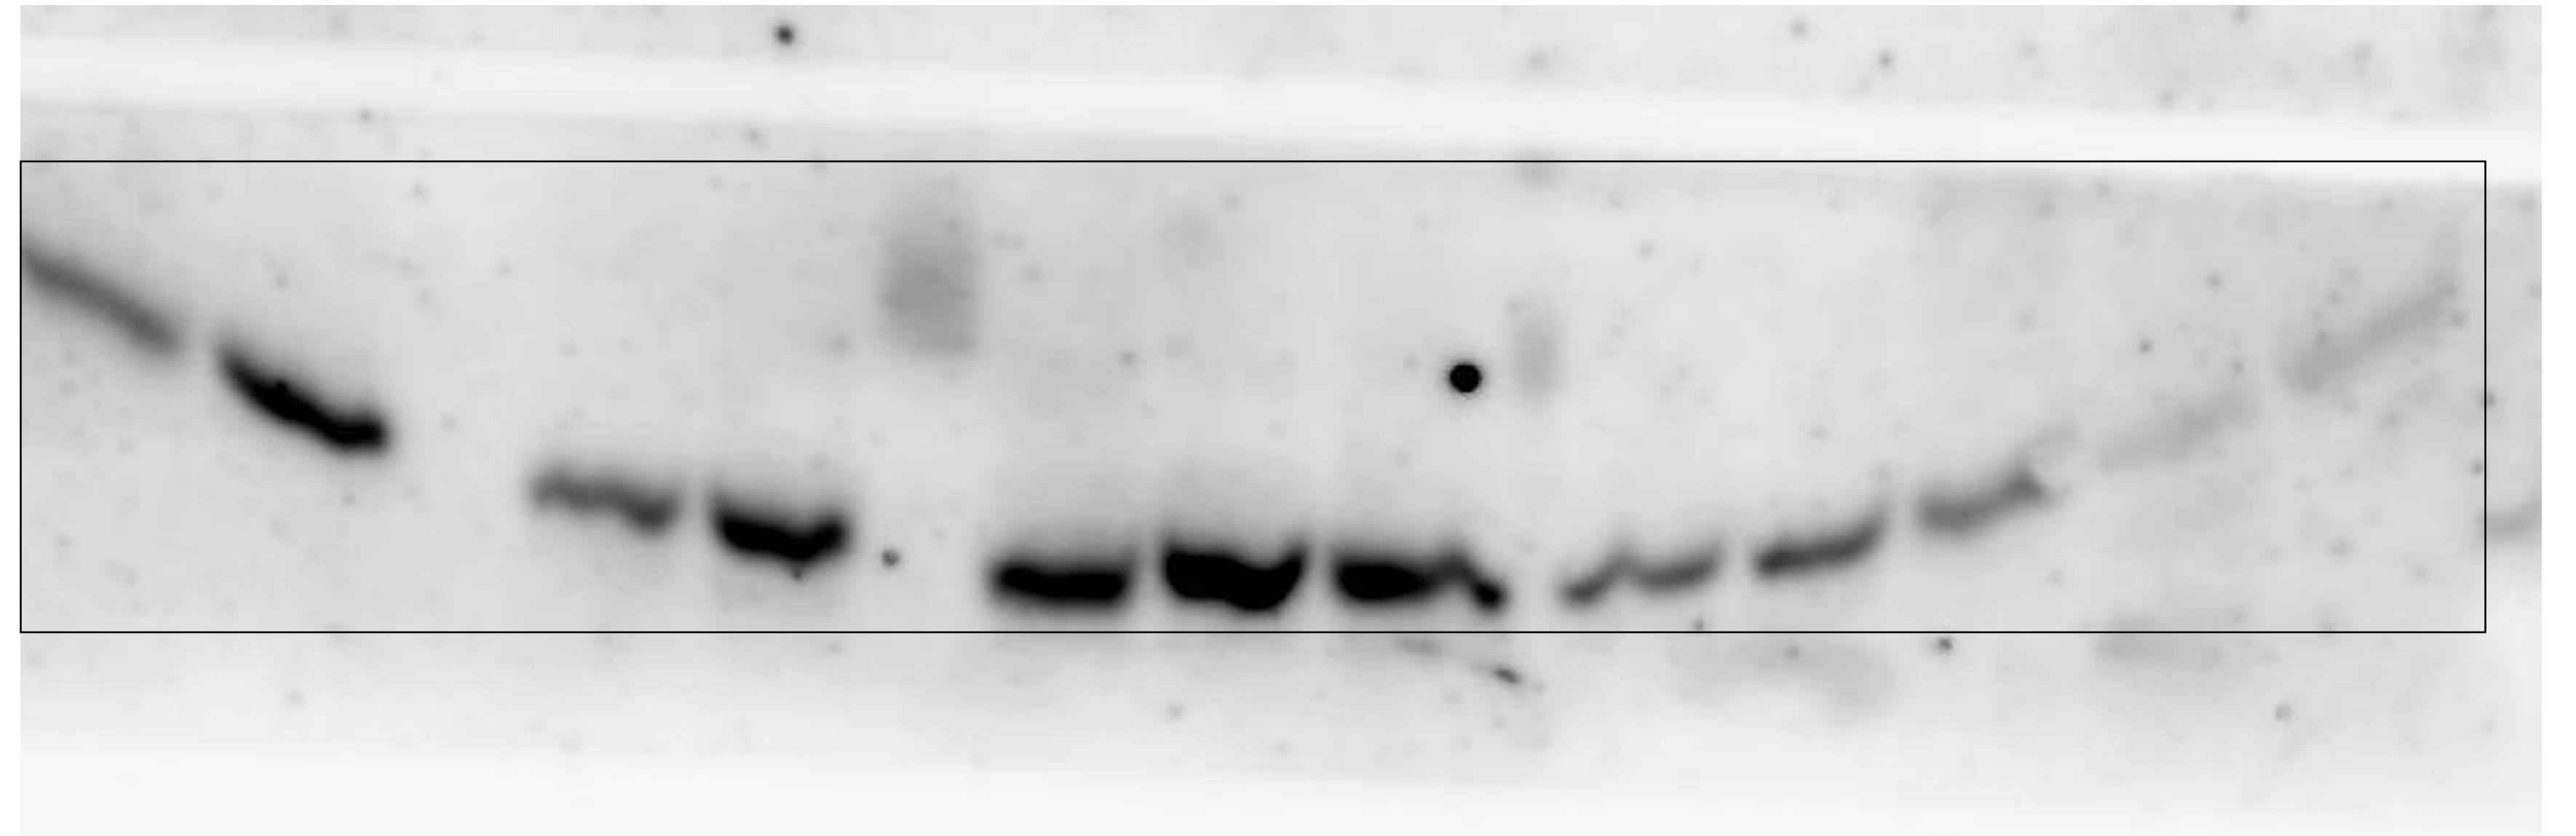

Suppl Figure 10

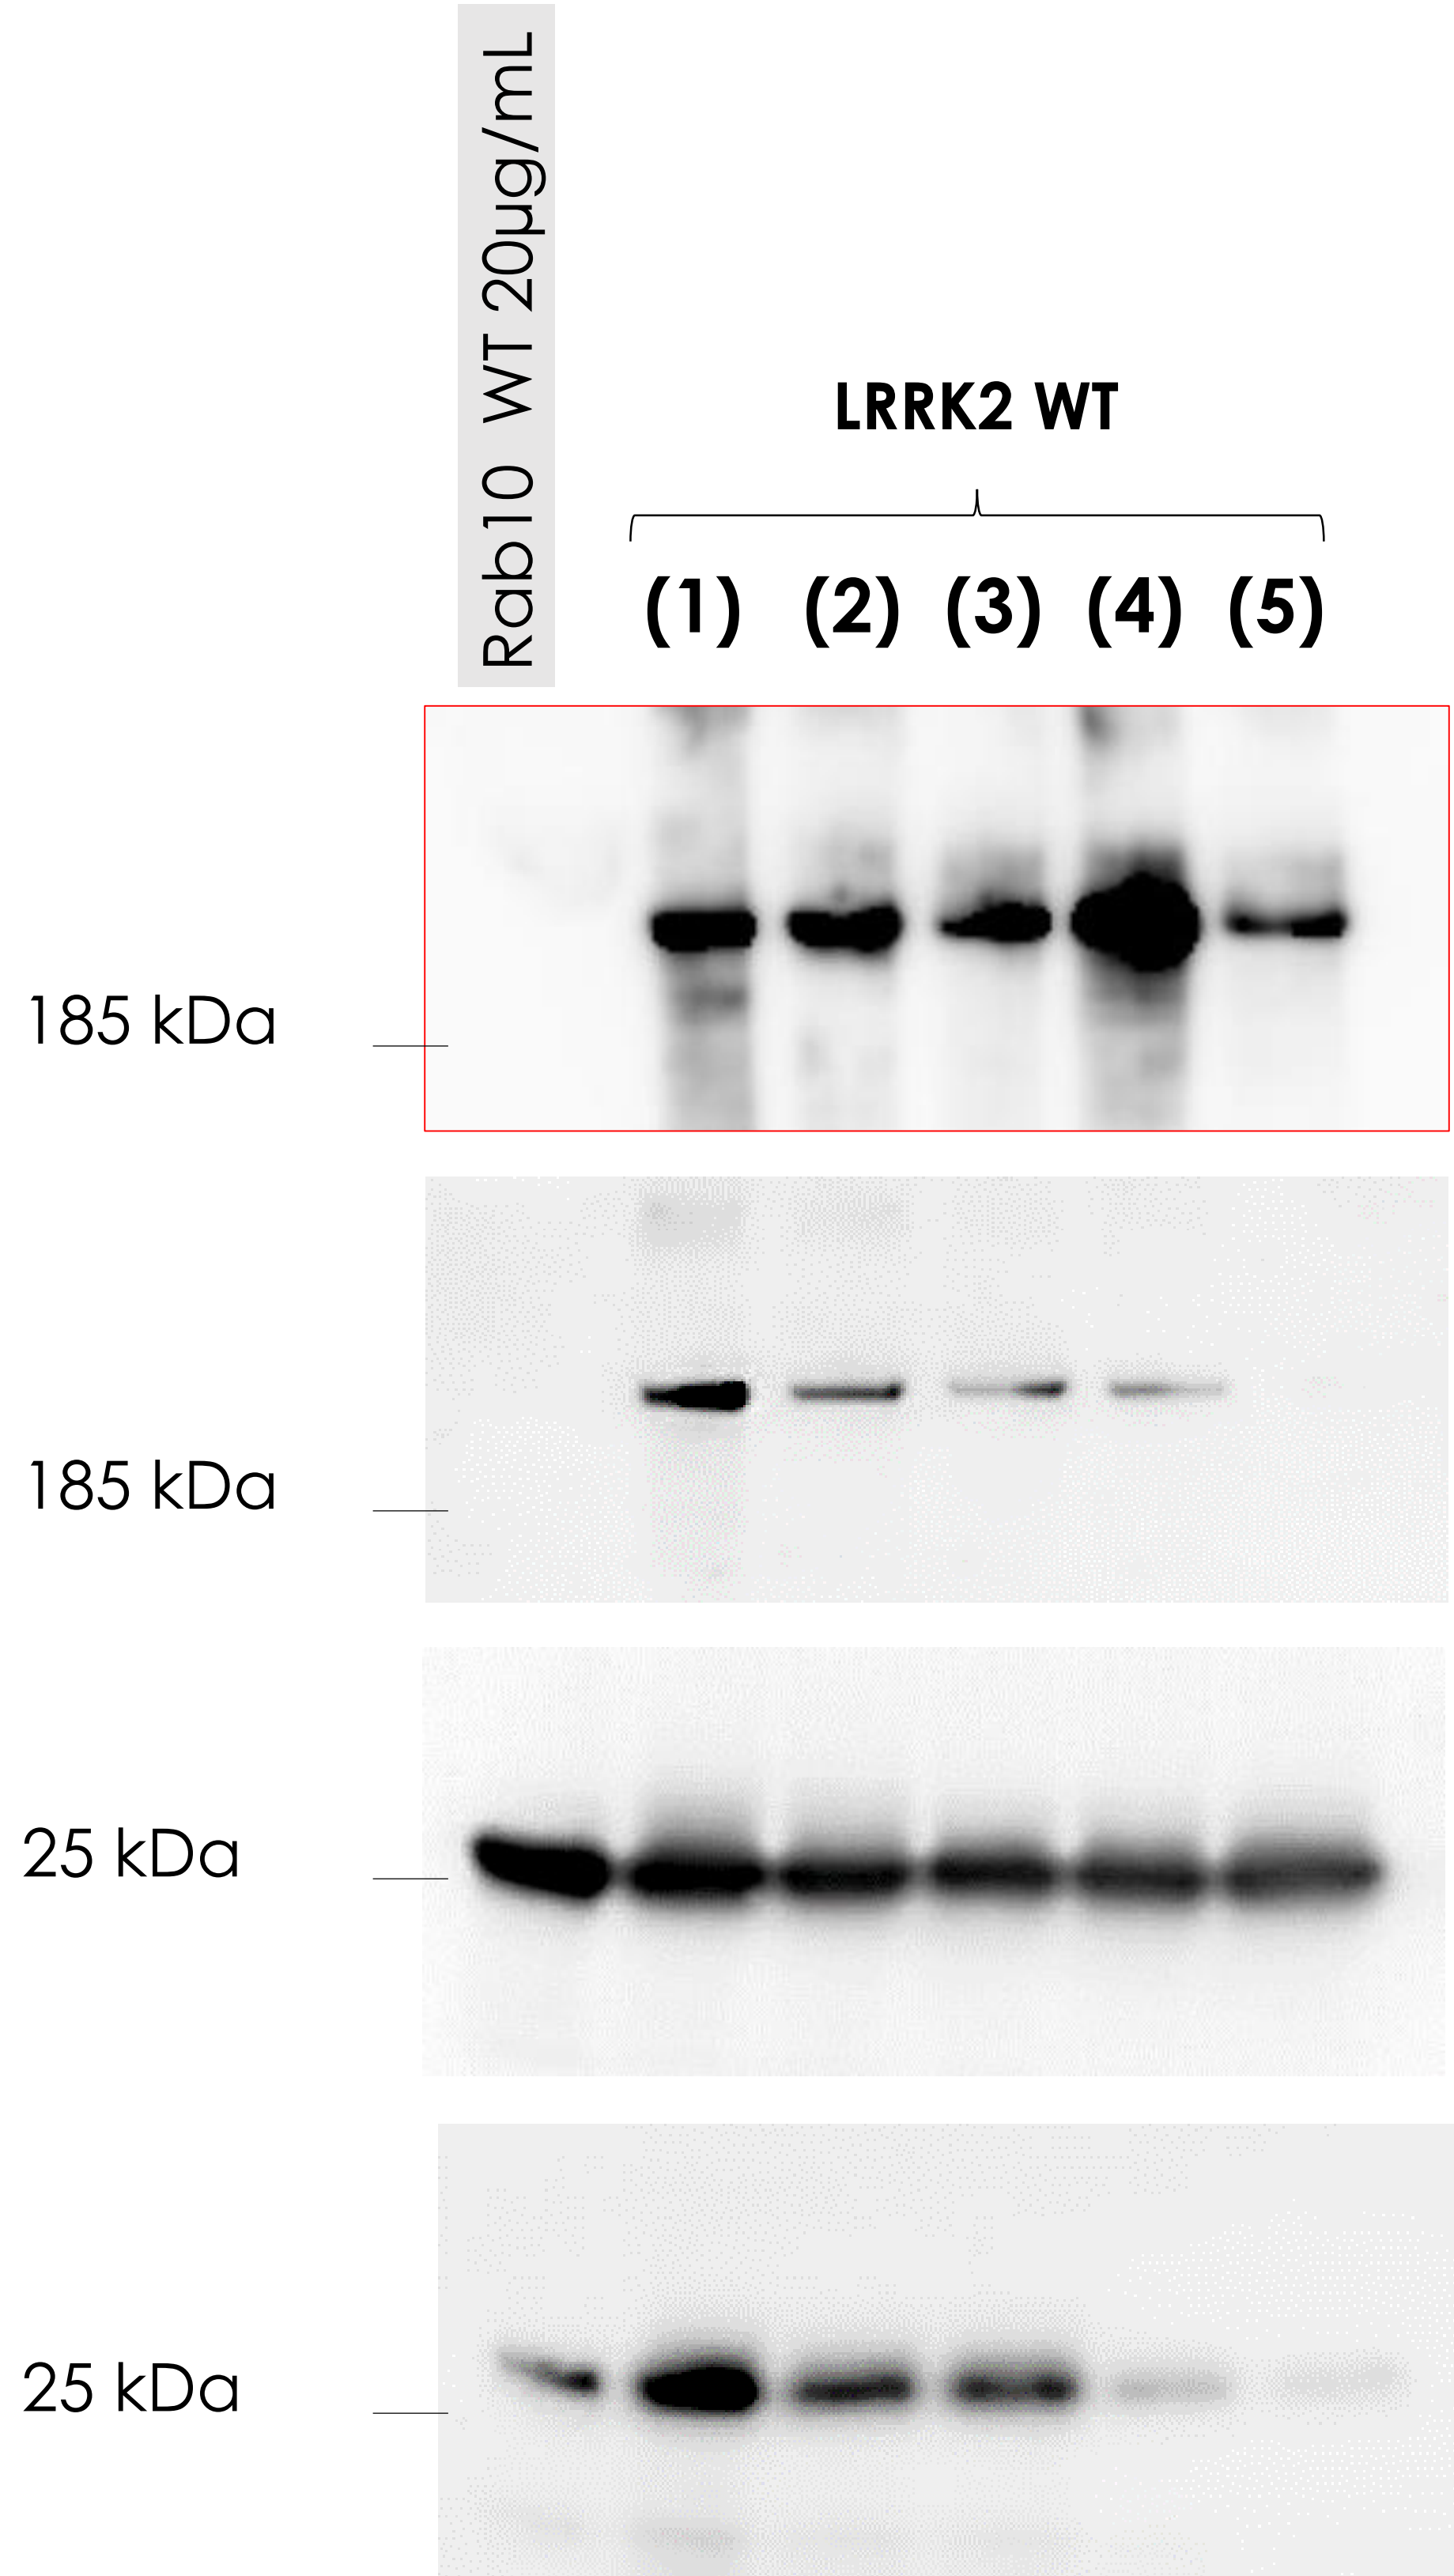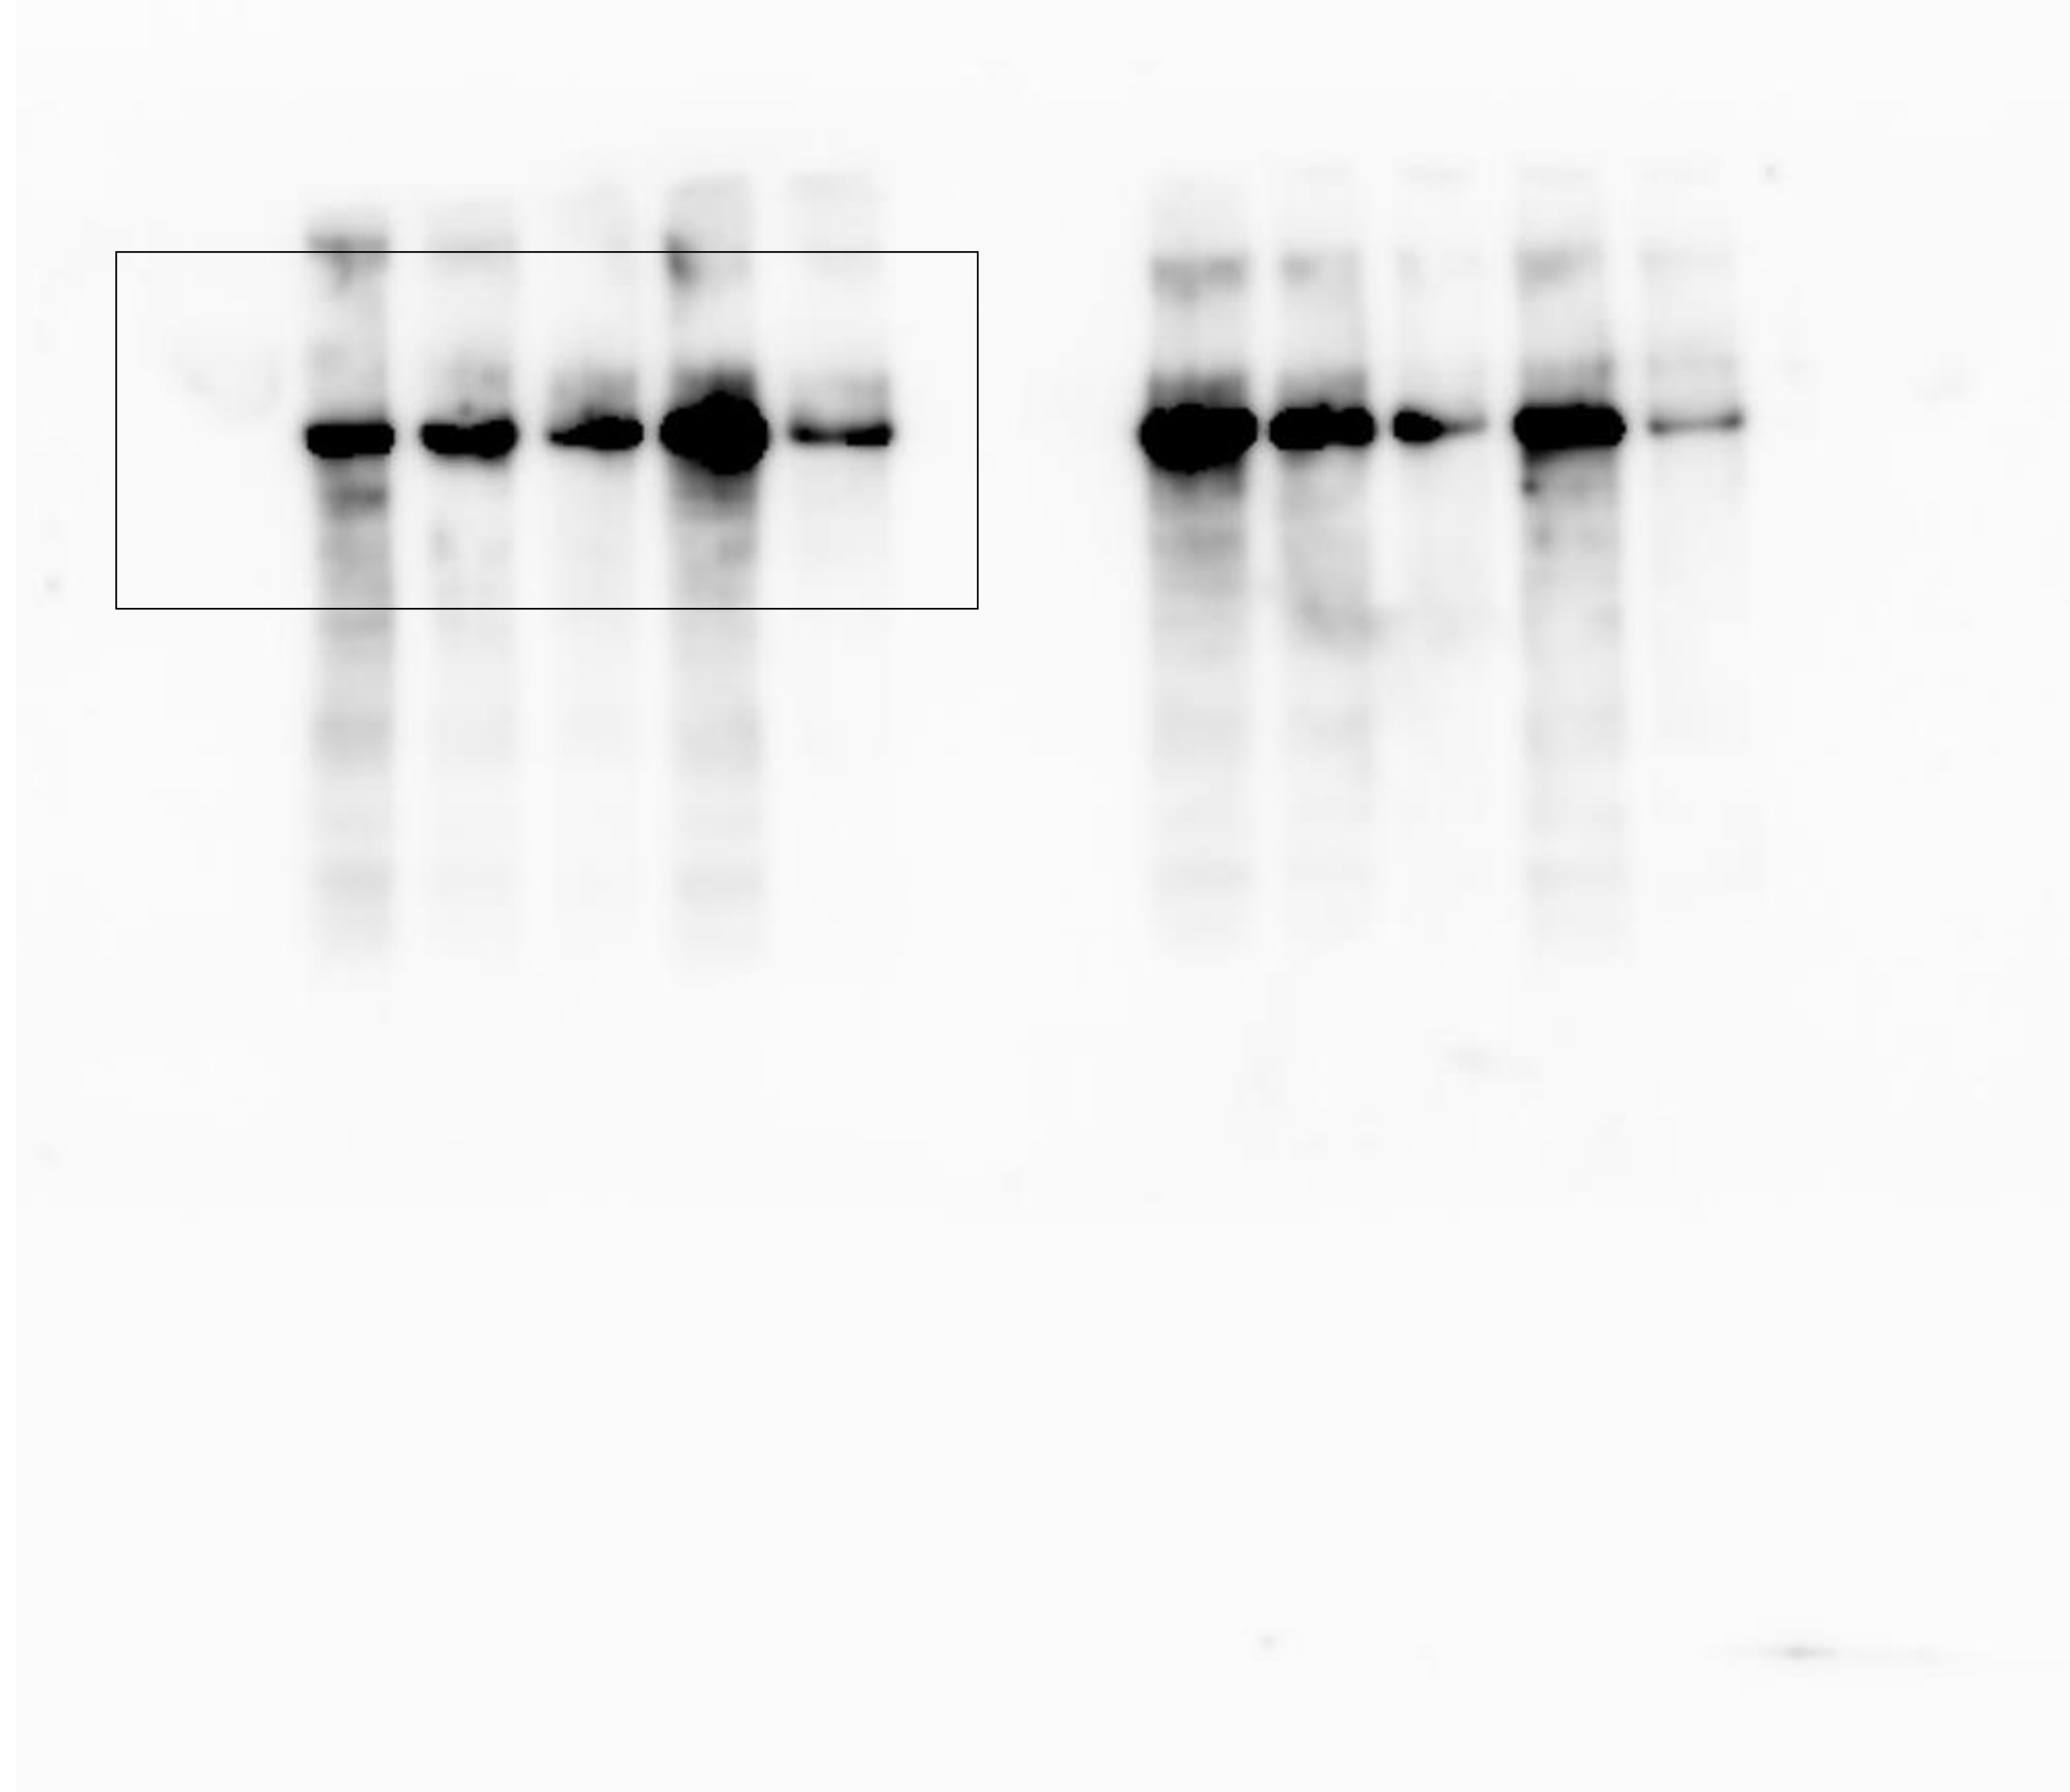

Suppl Figure 10

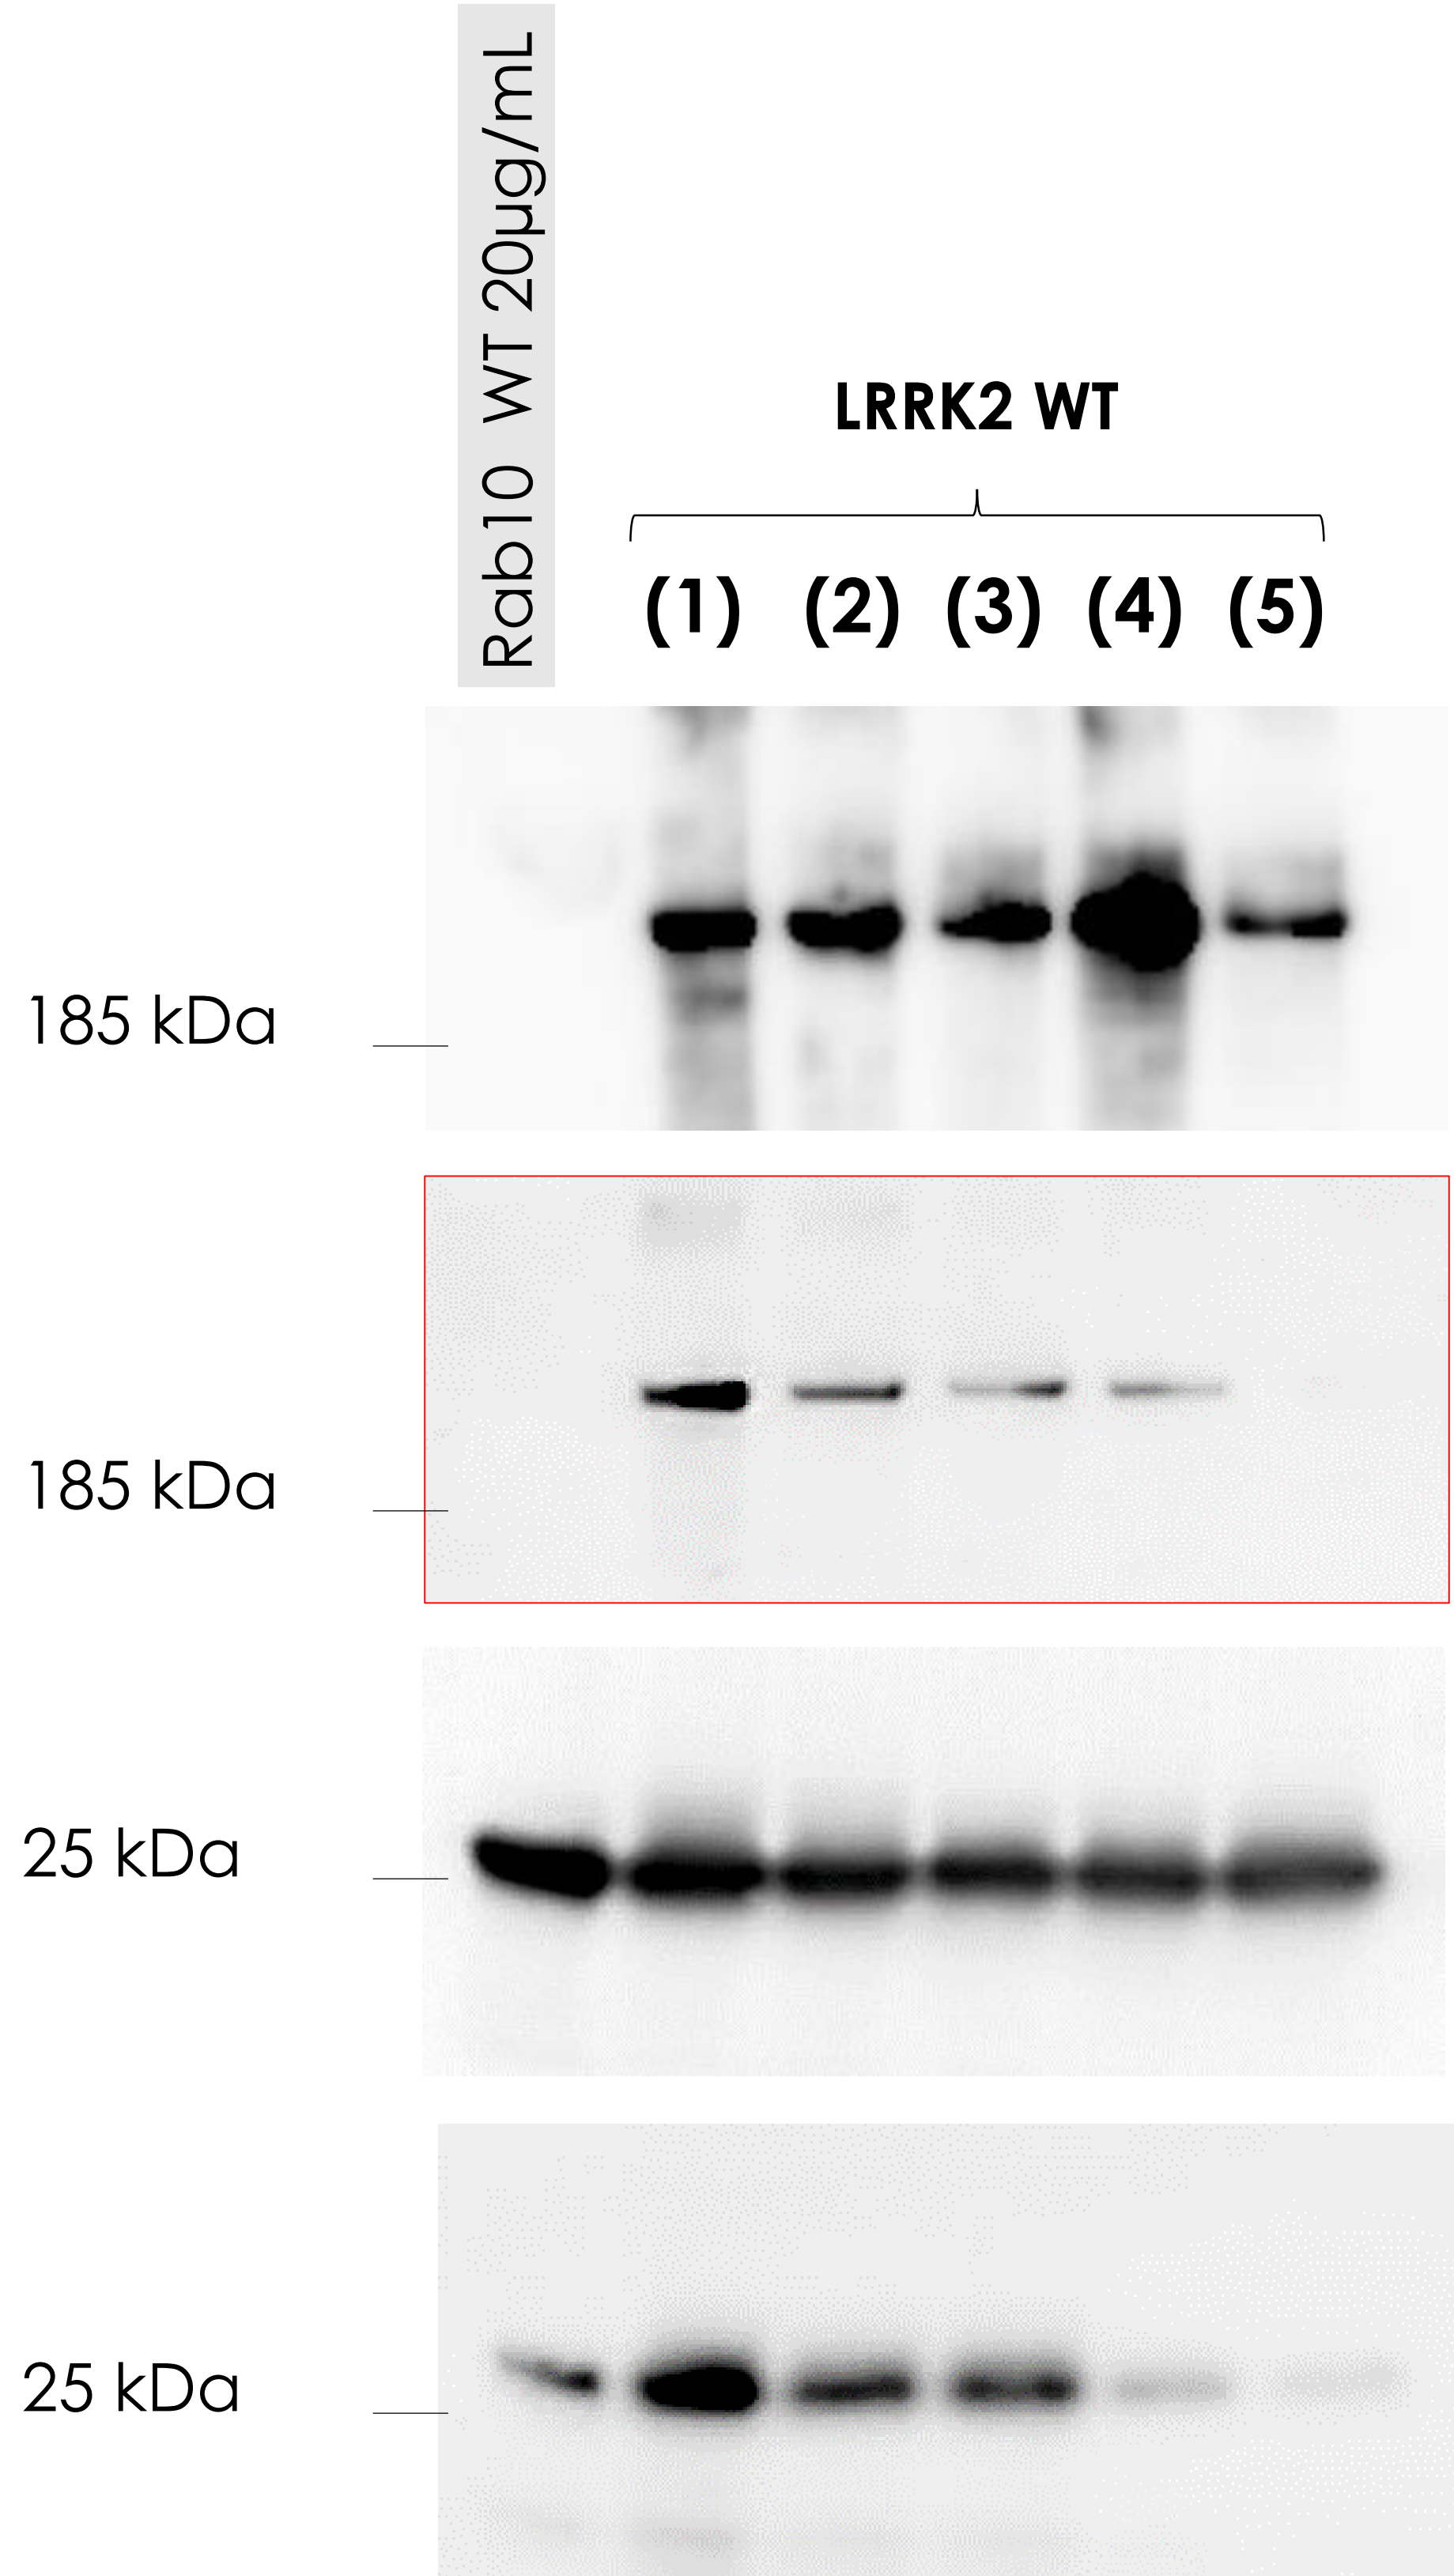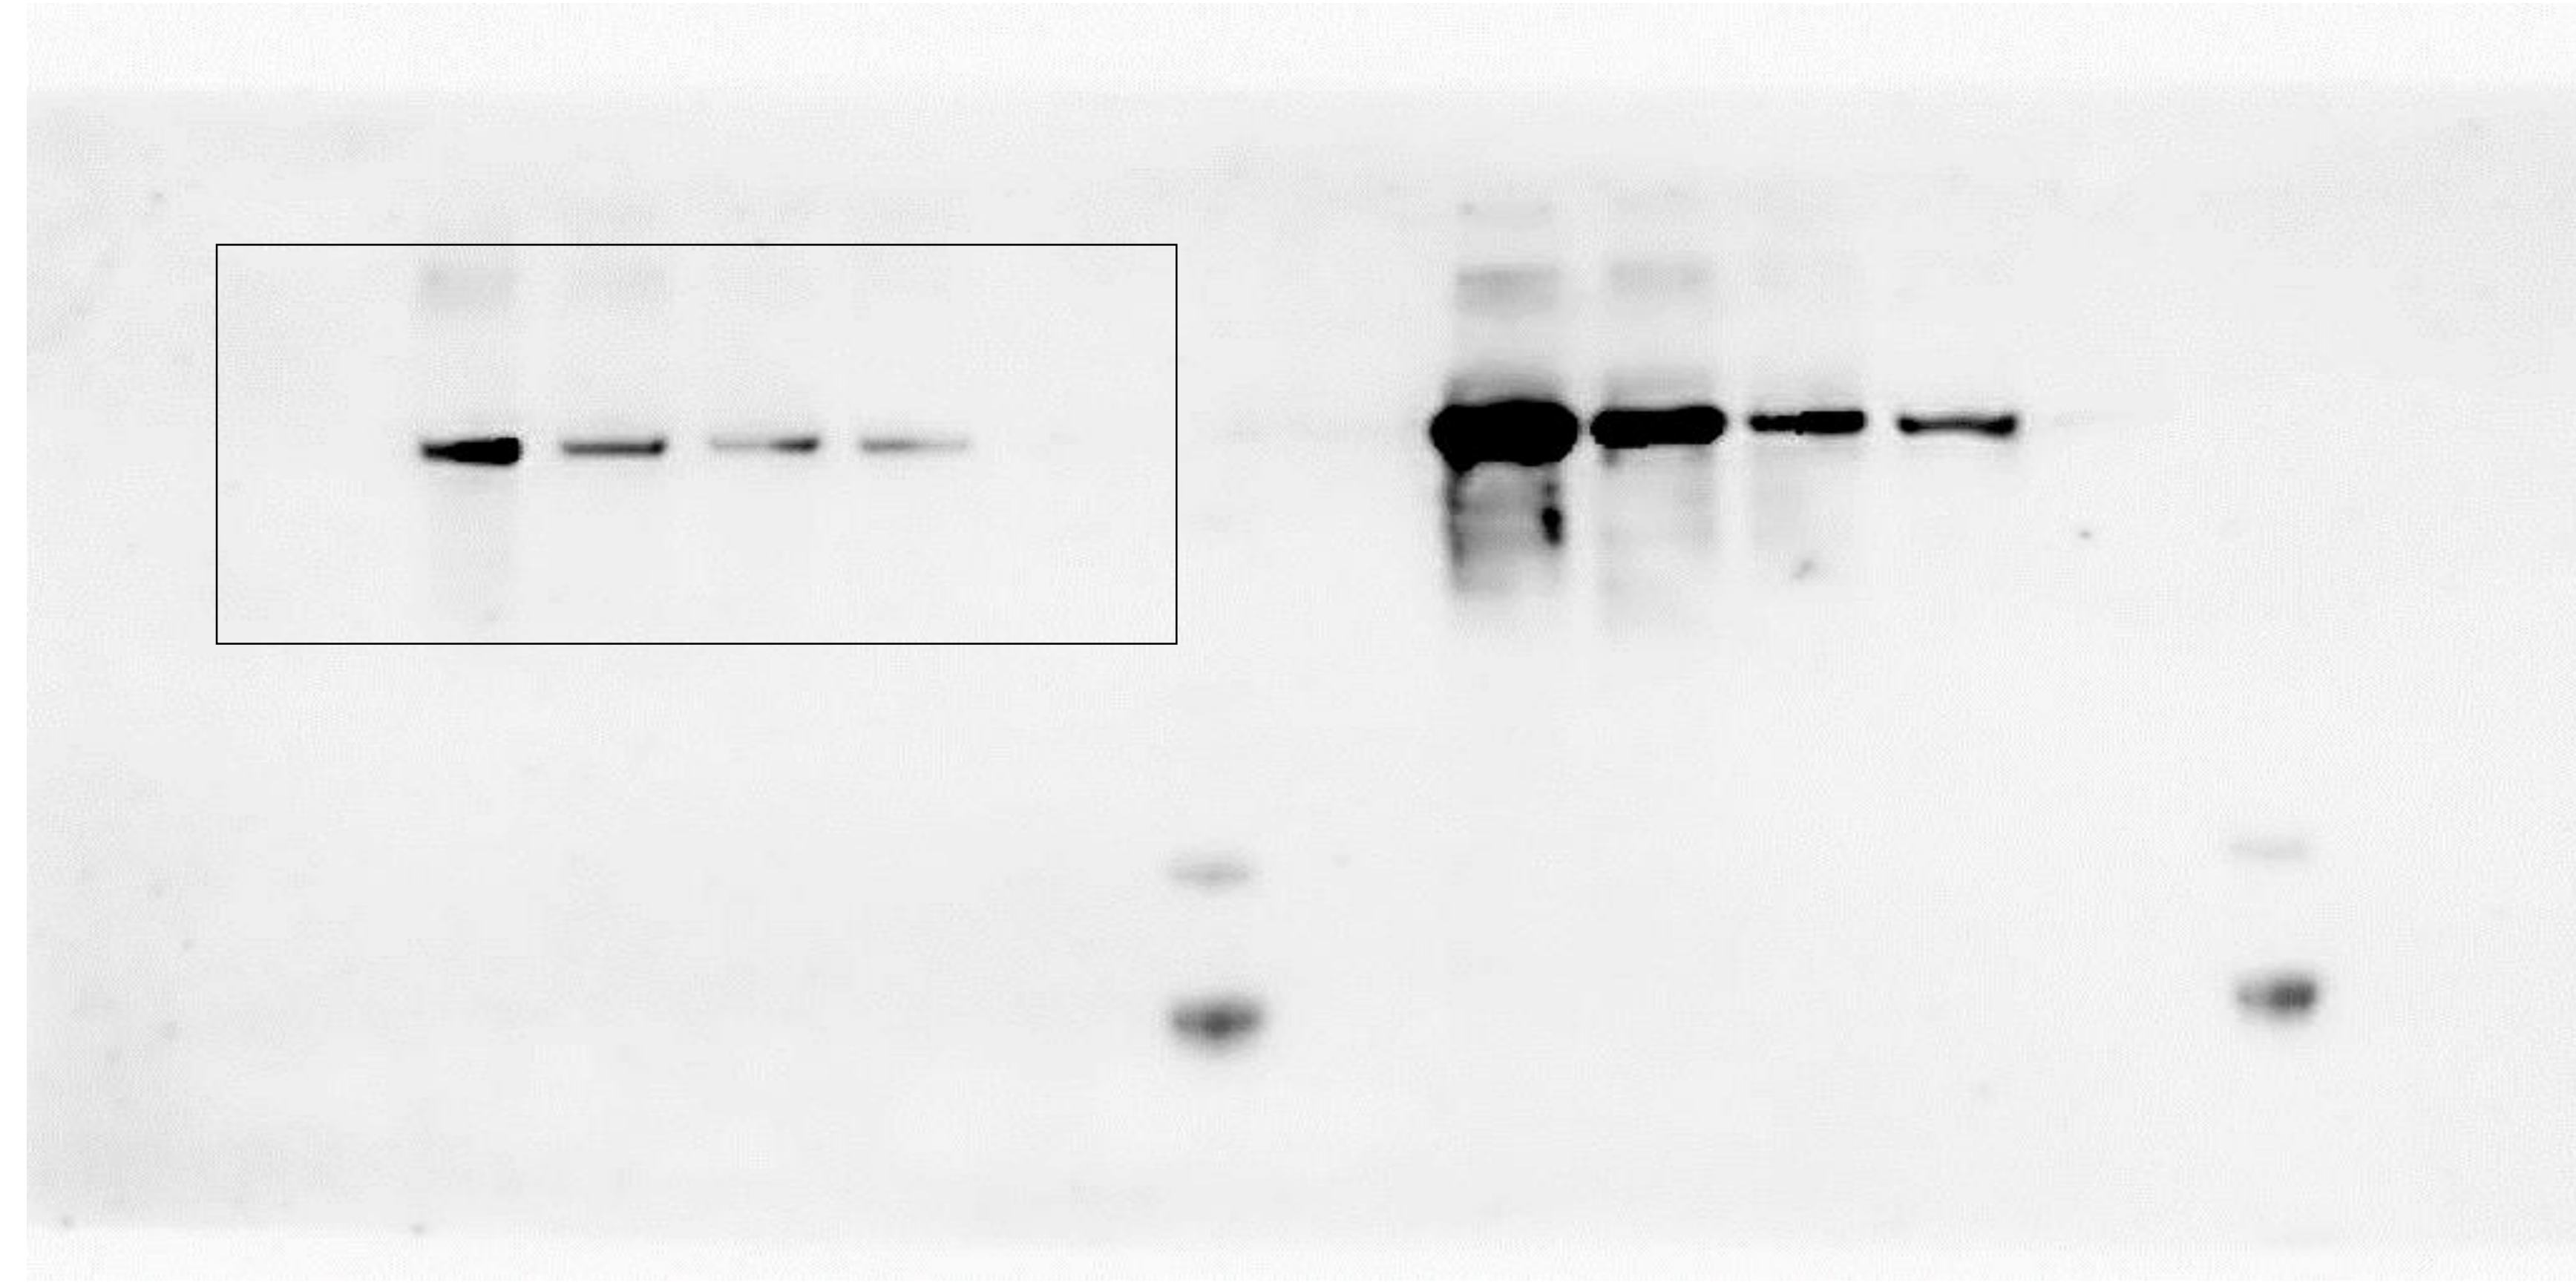

Suppl Figure 10

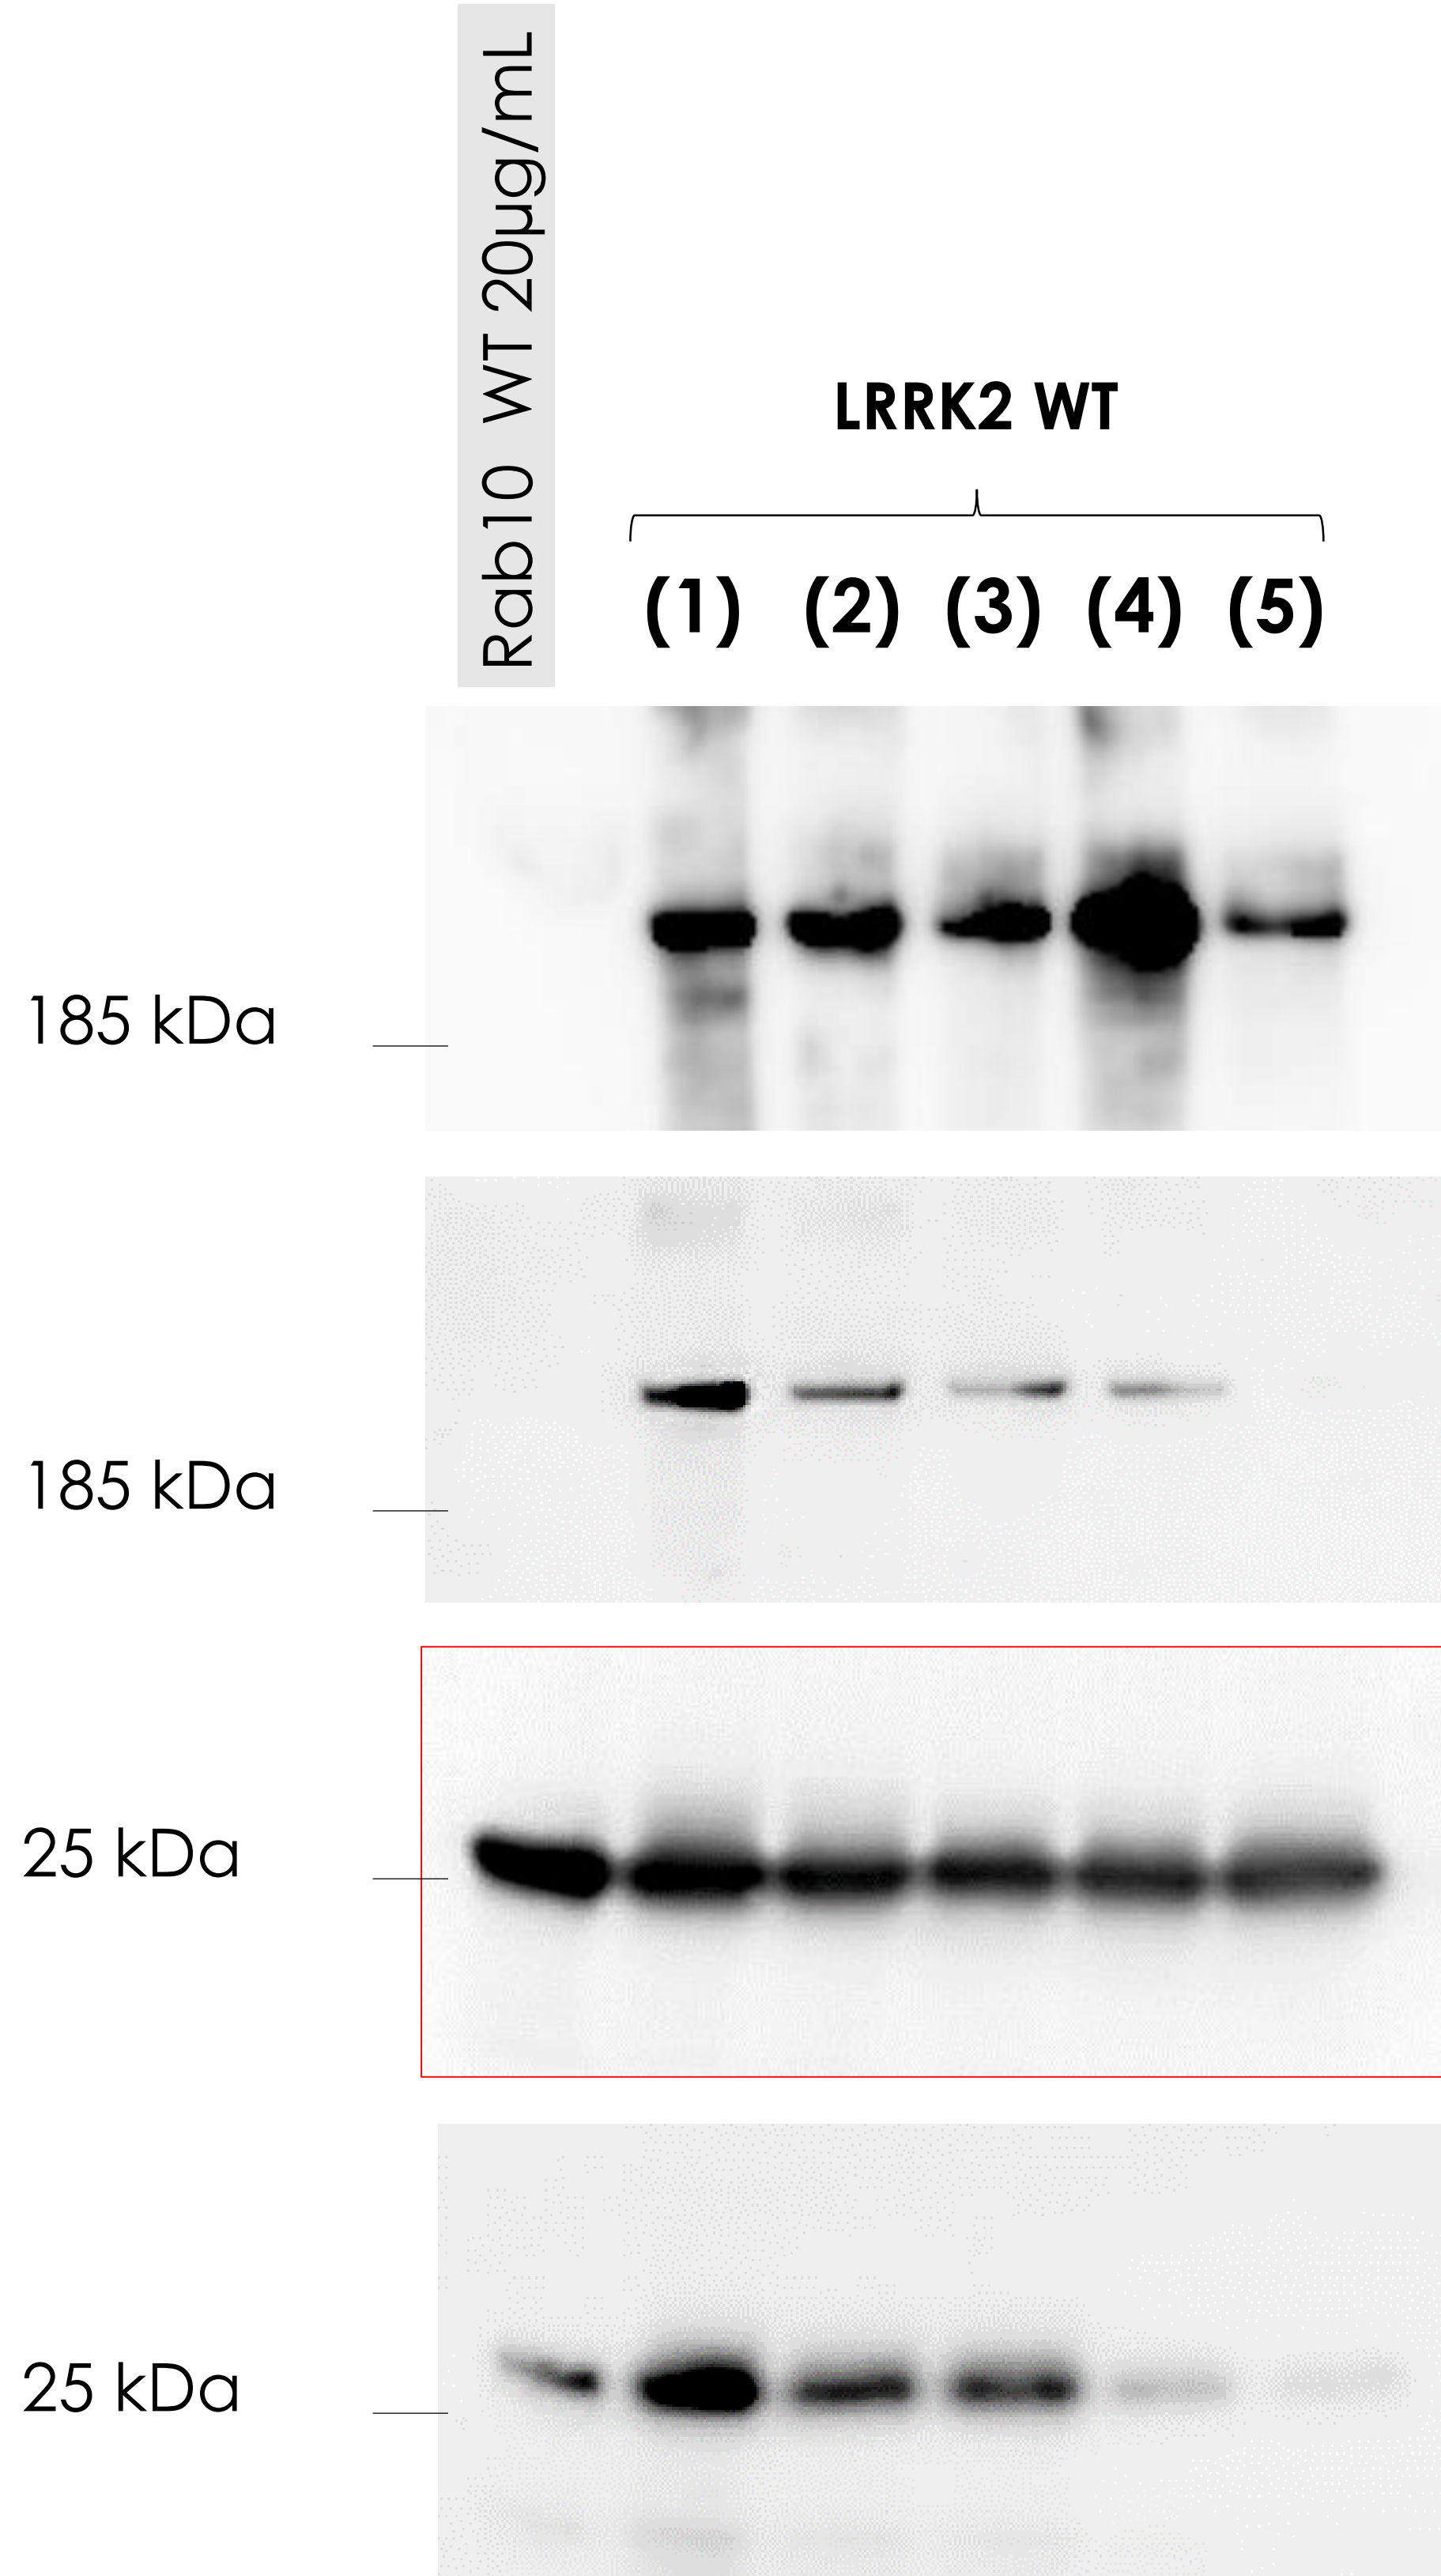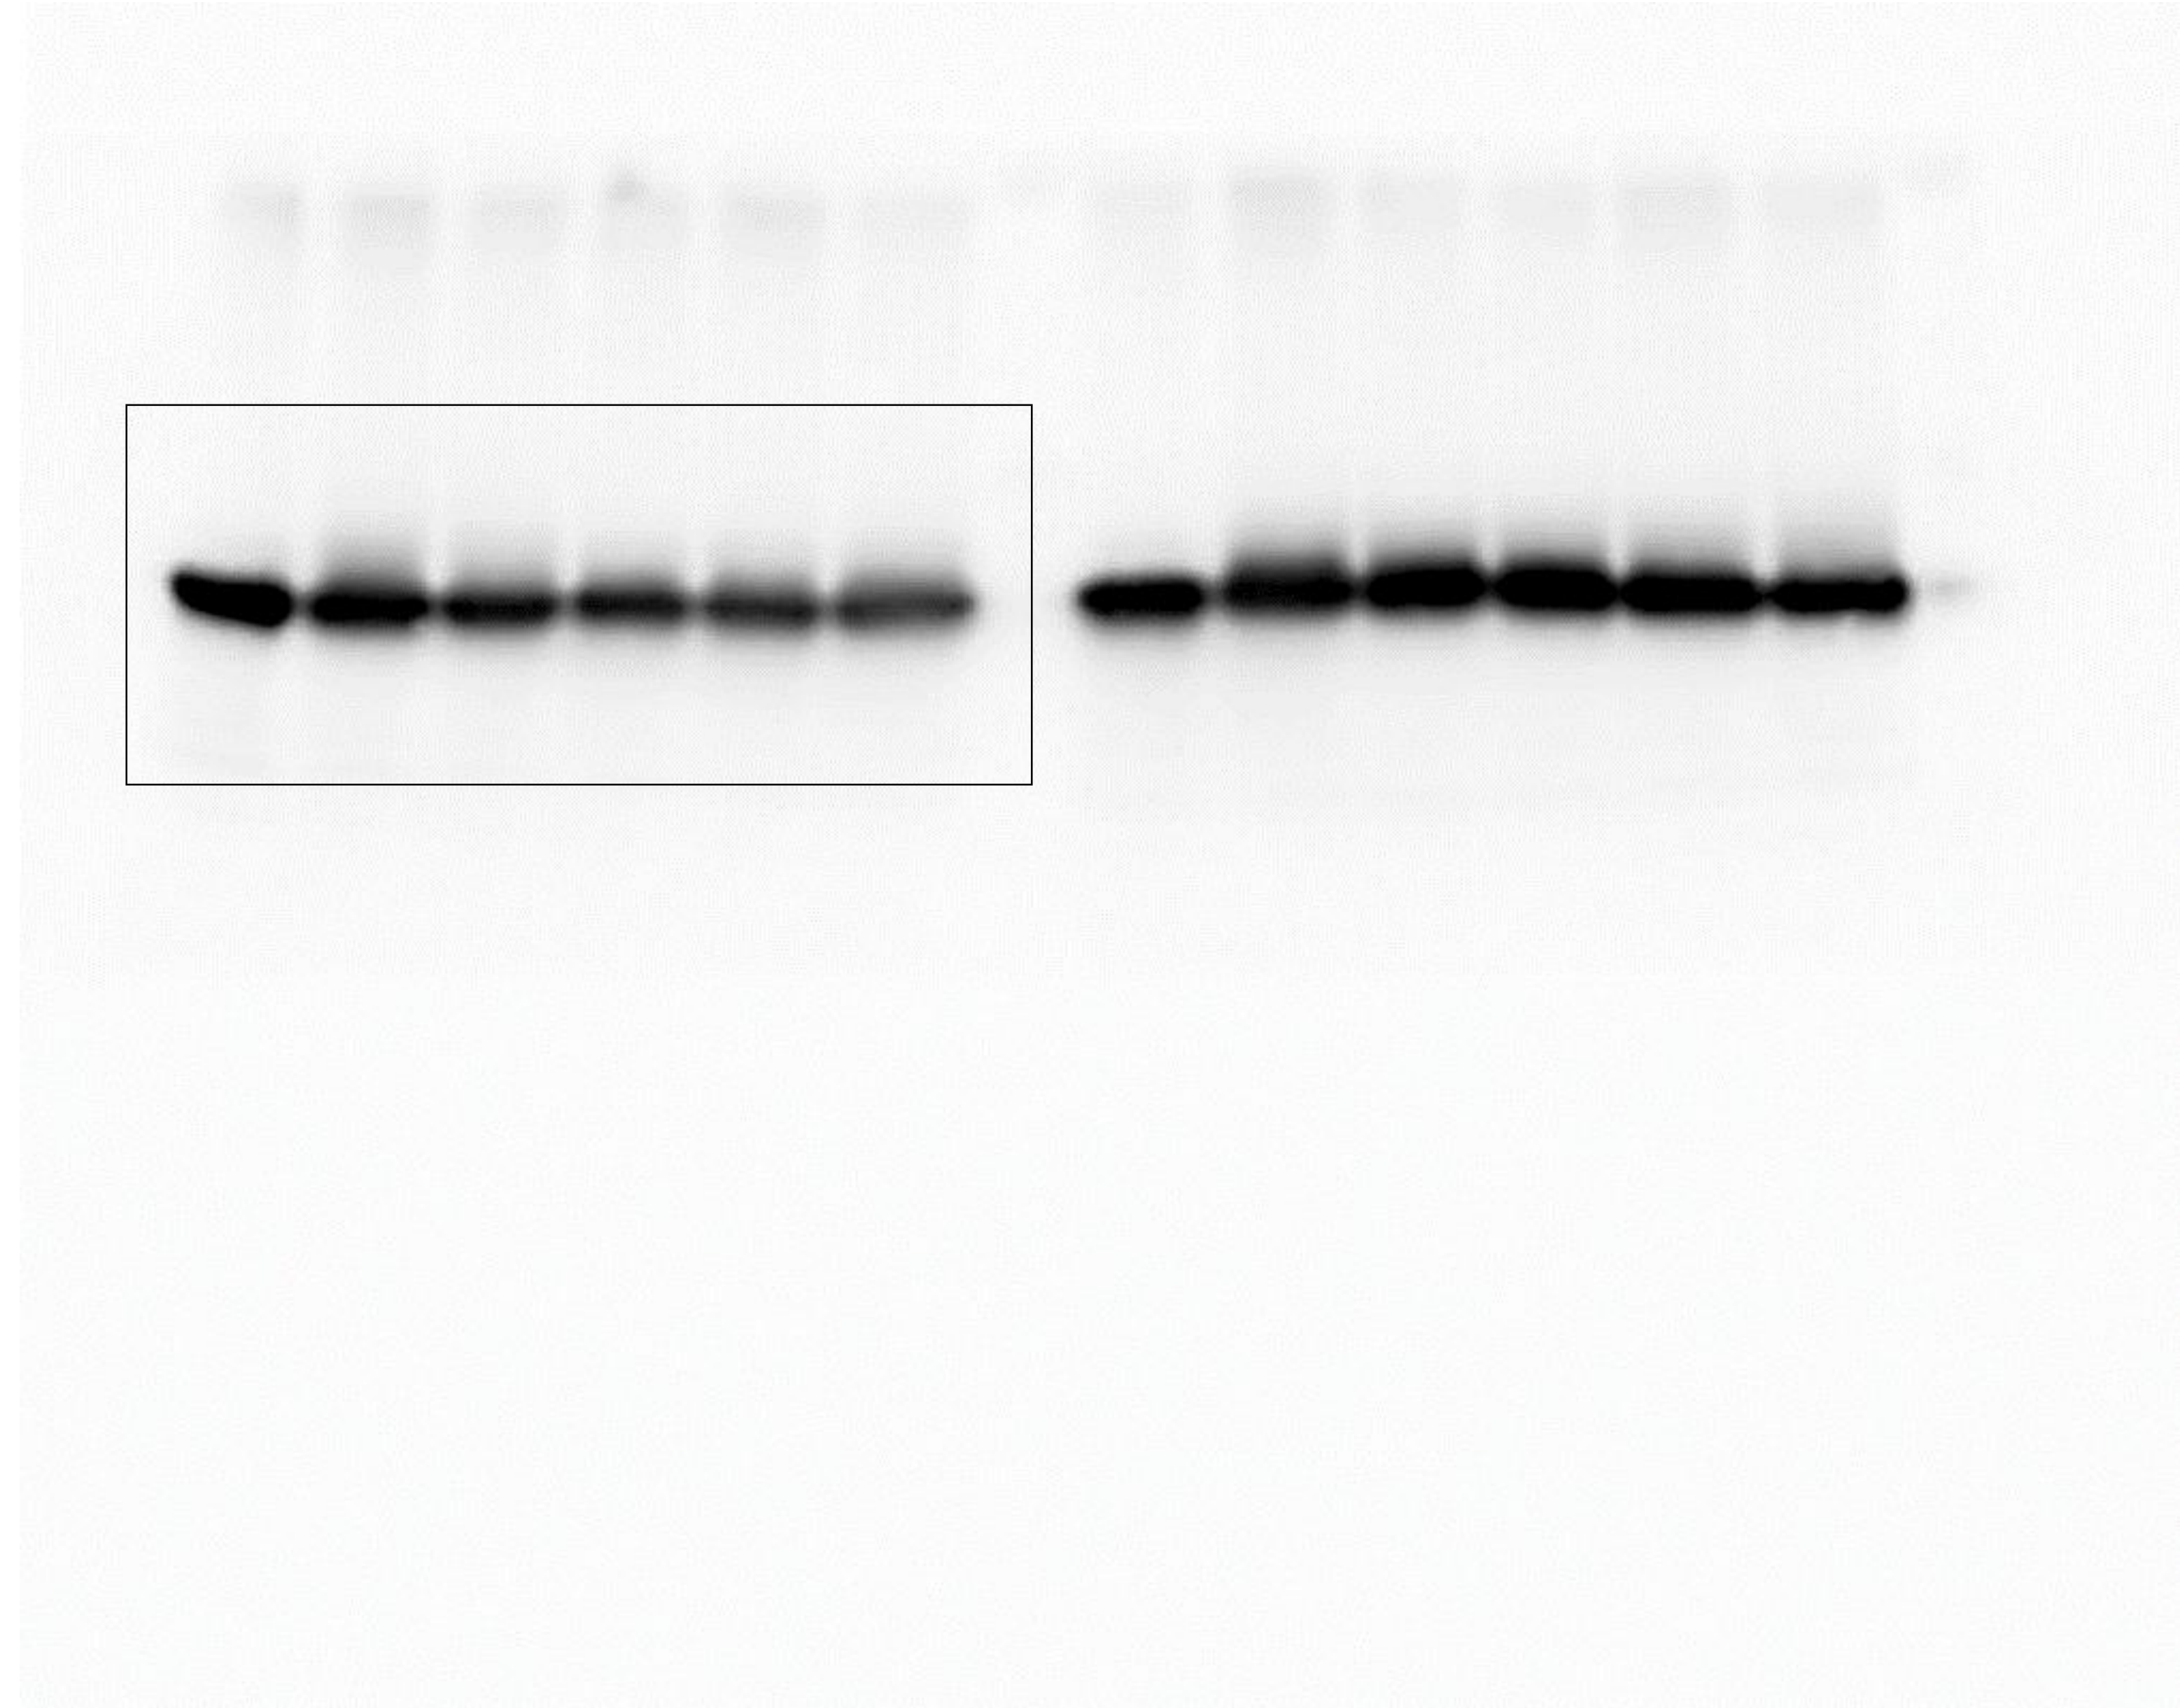

Suppl Figure 10

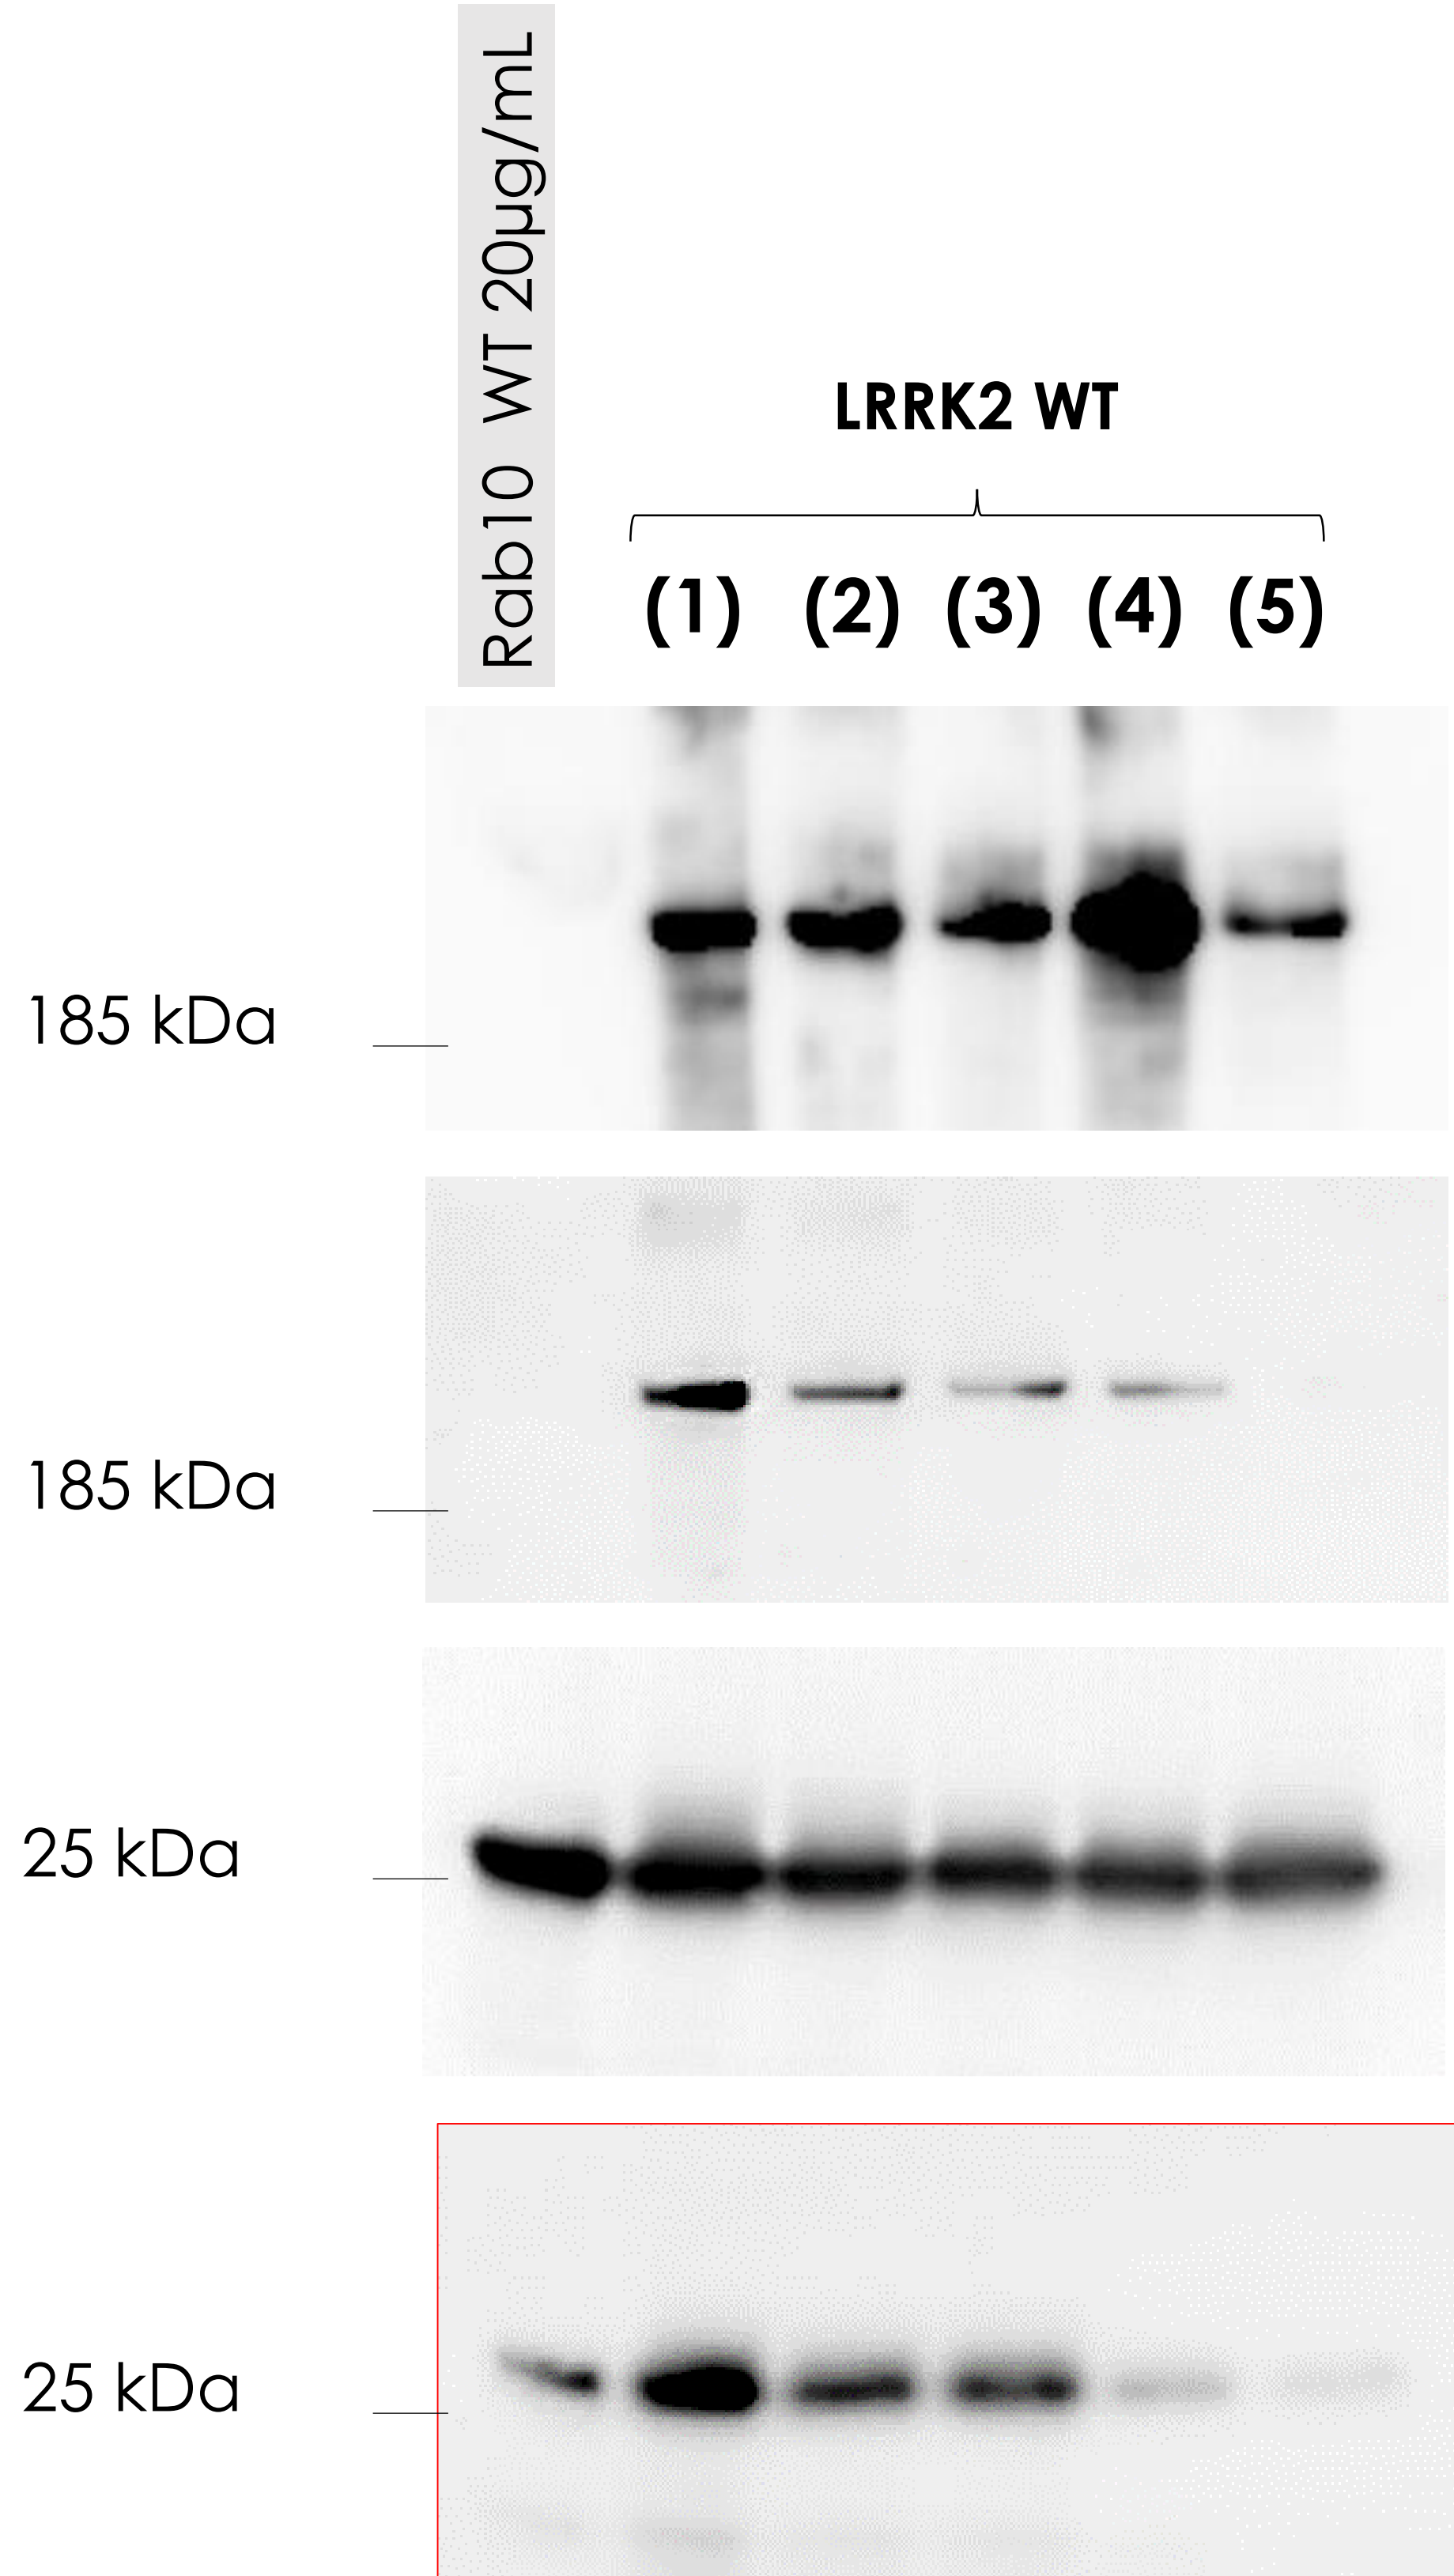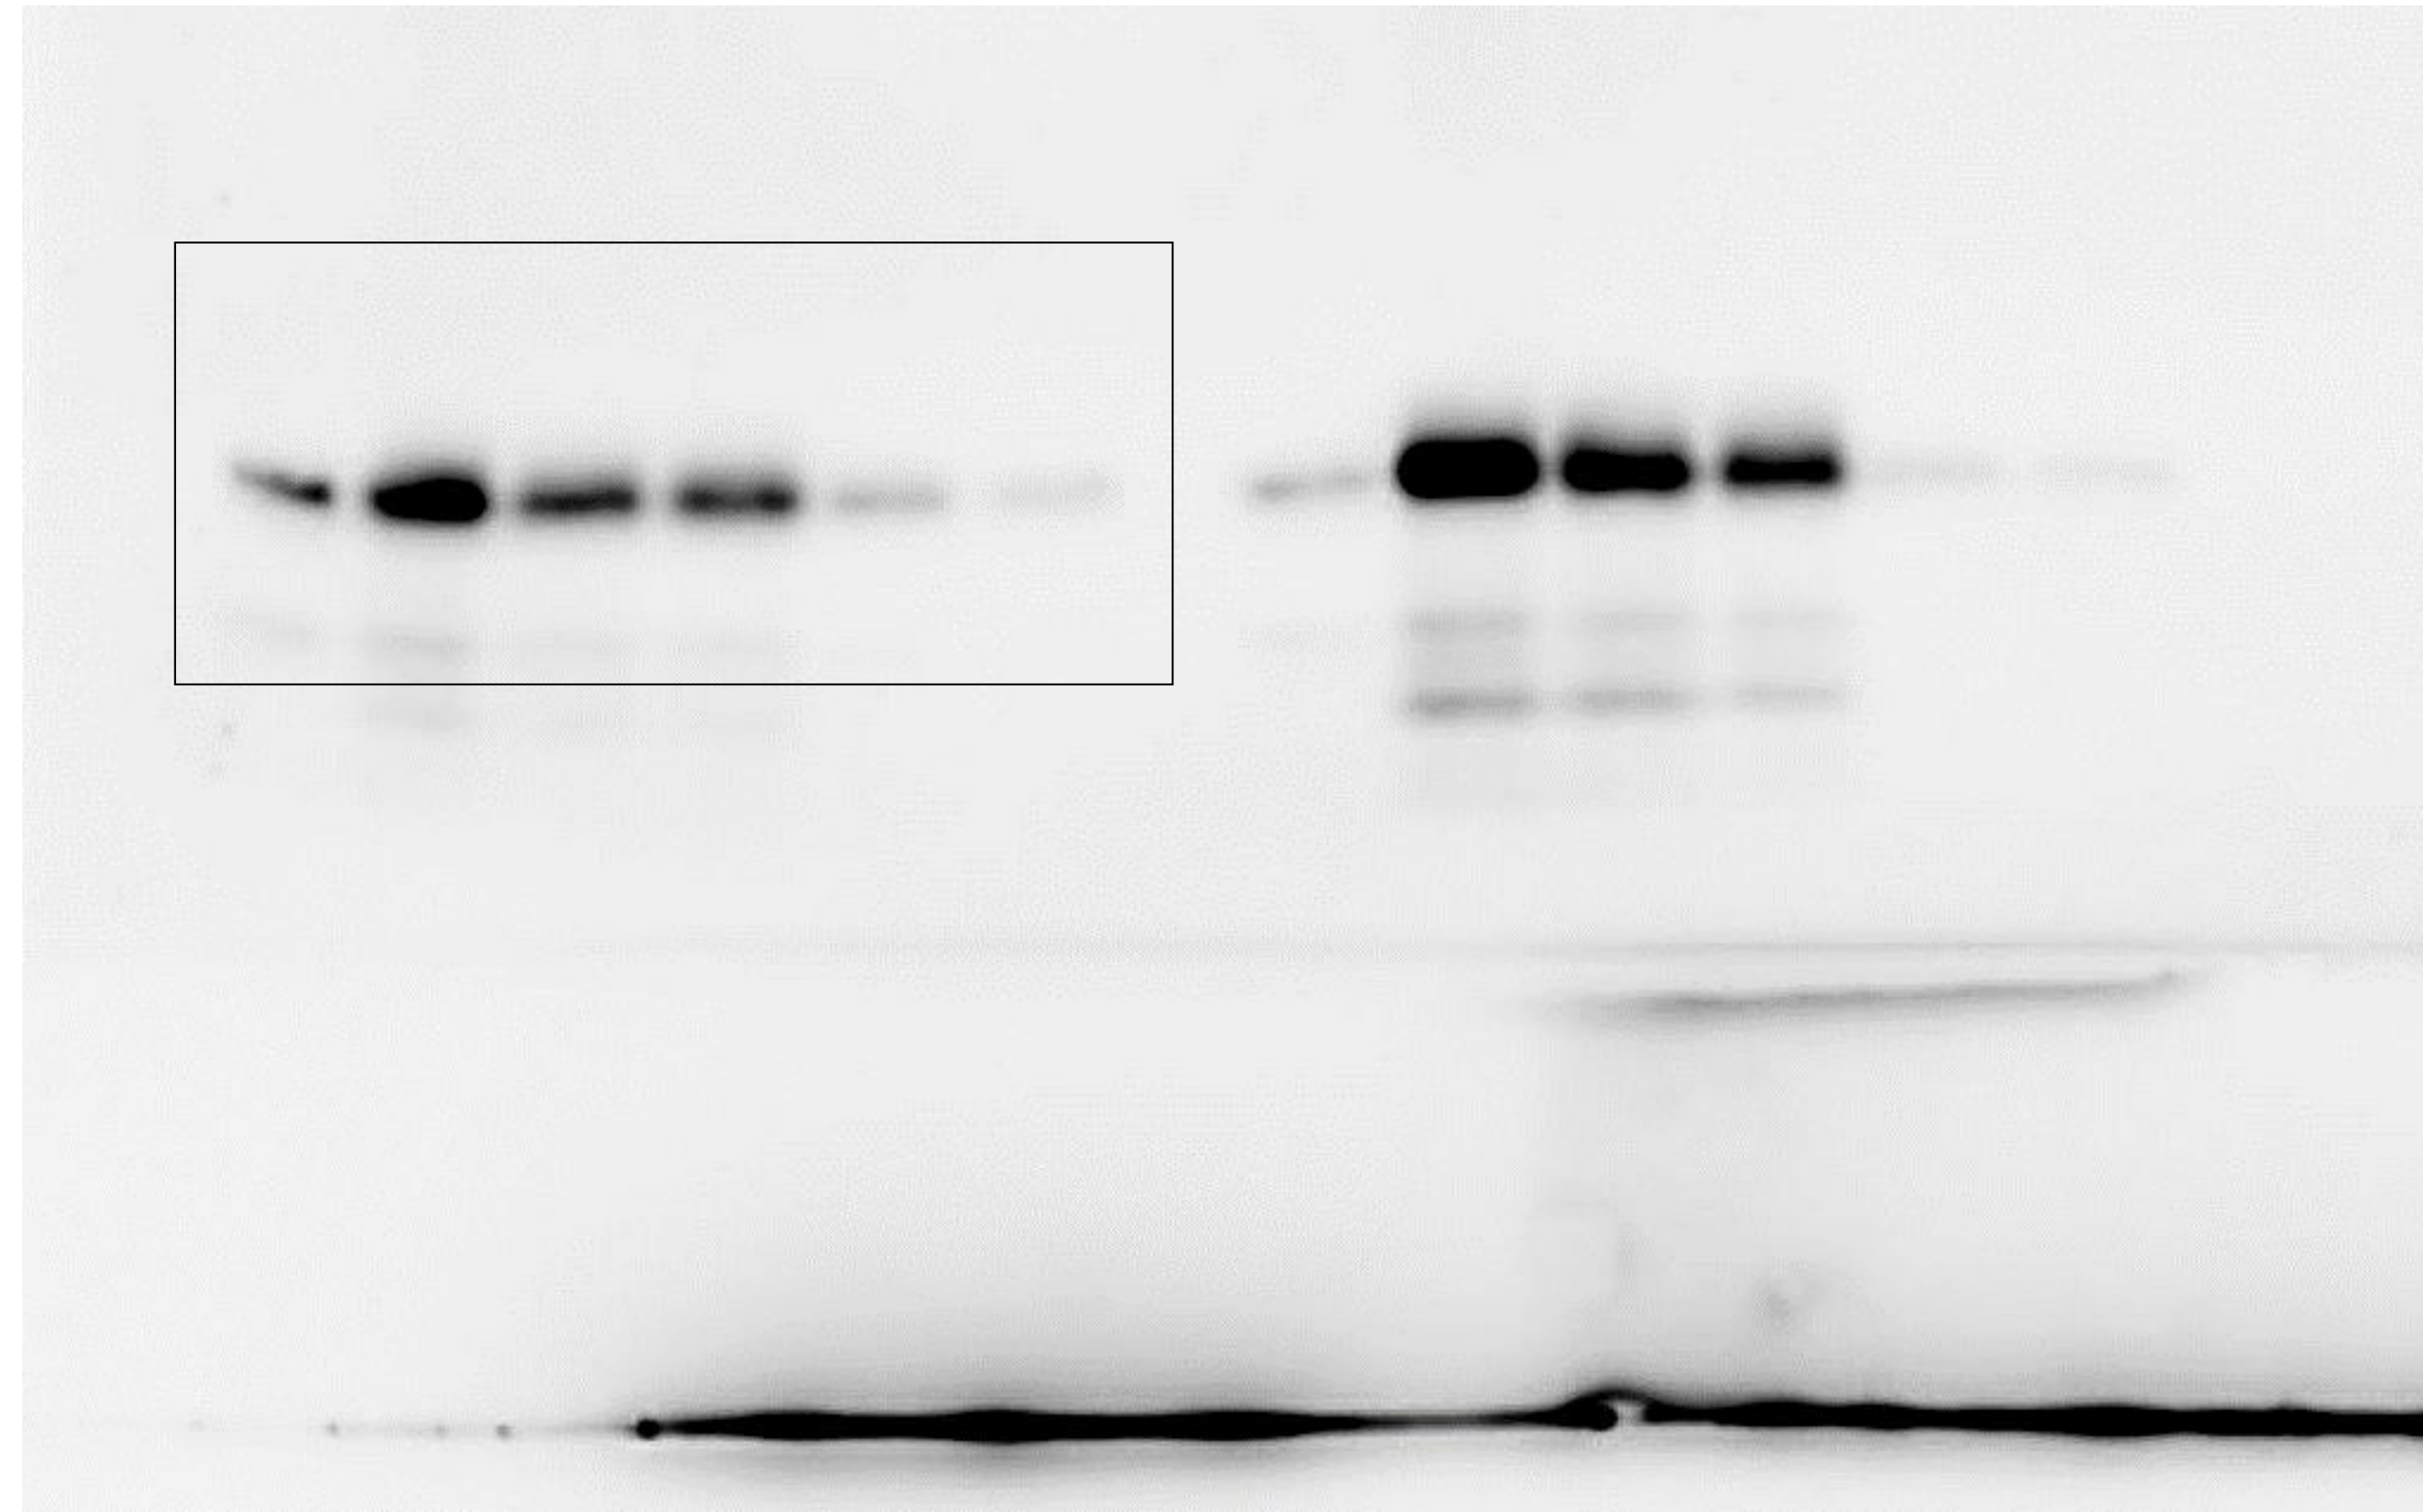

Suppl Figure 10

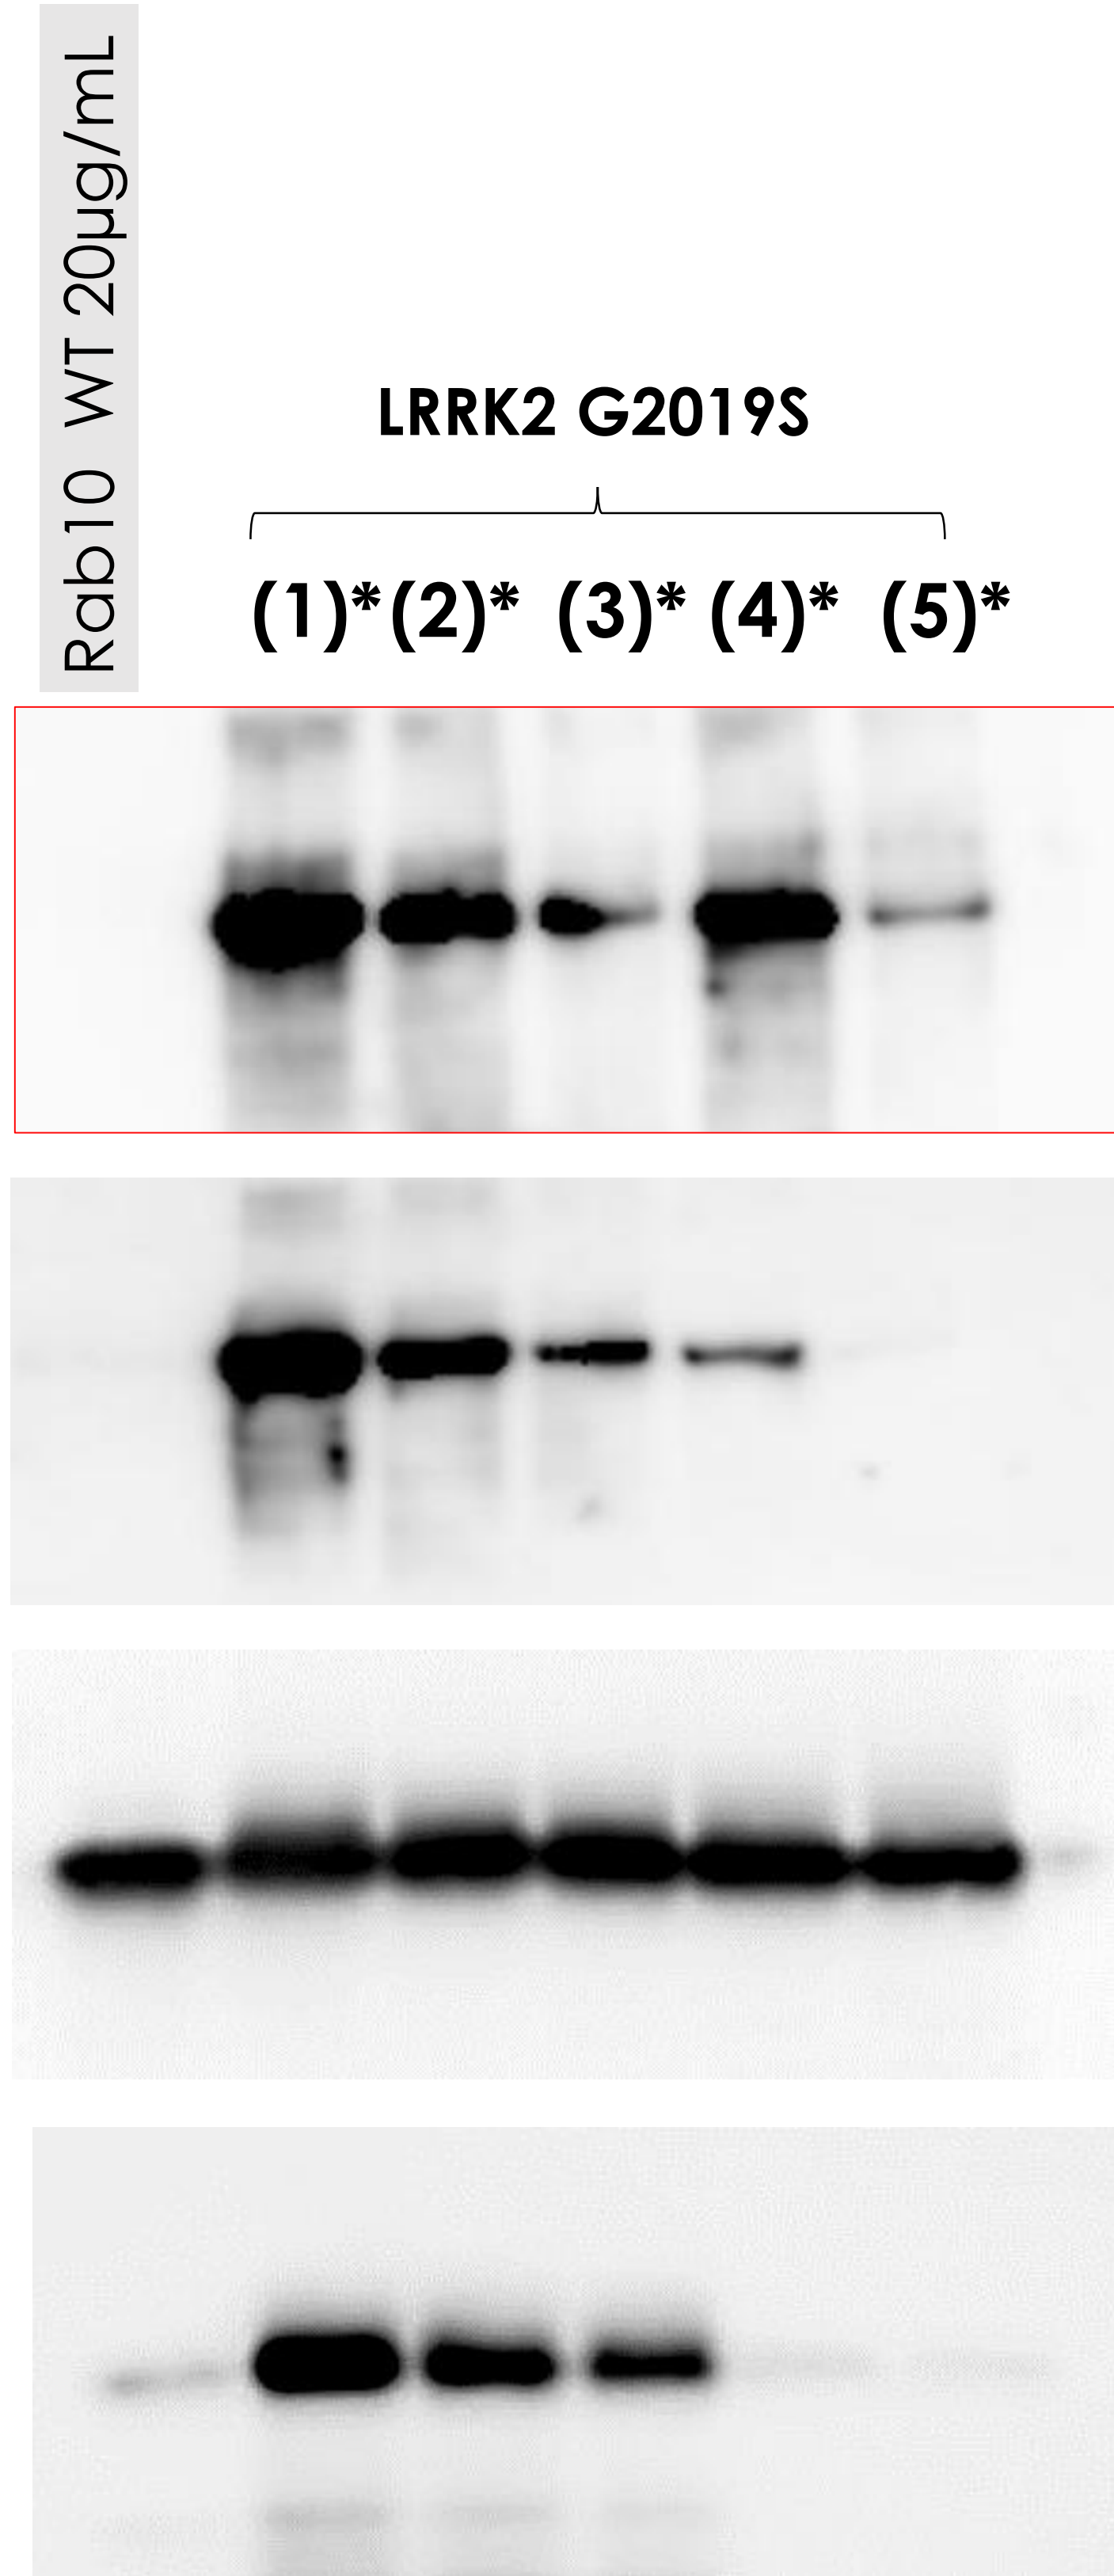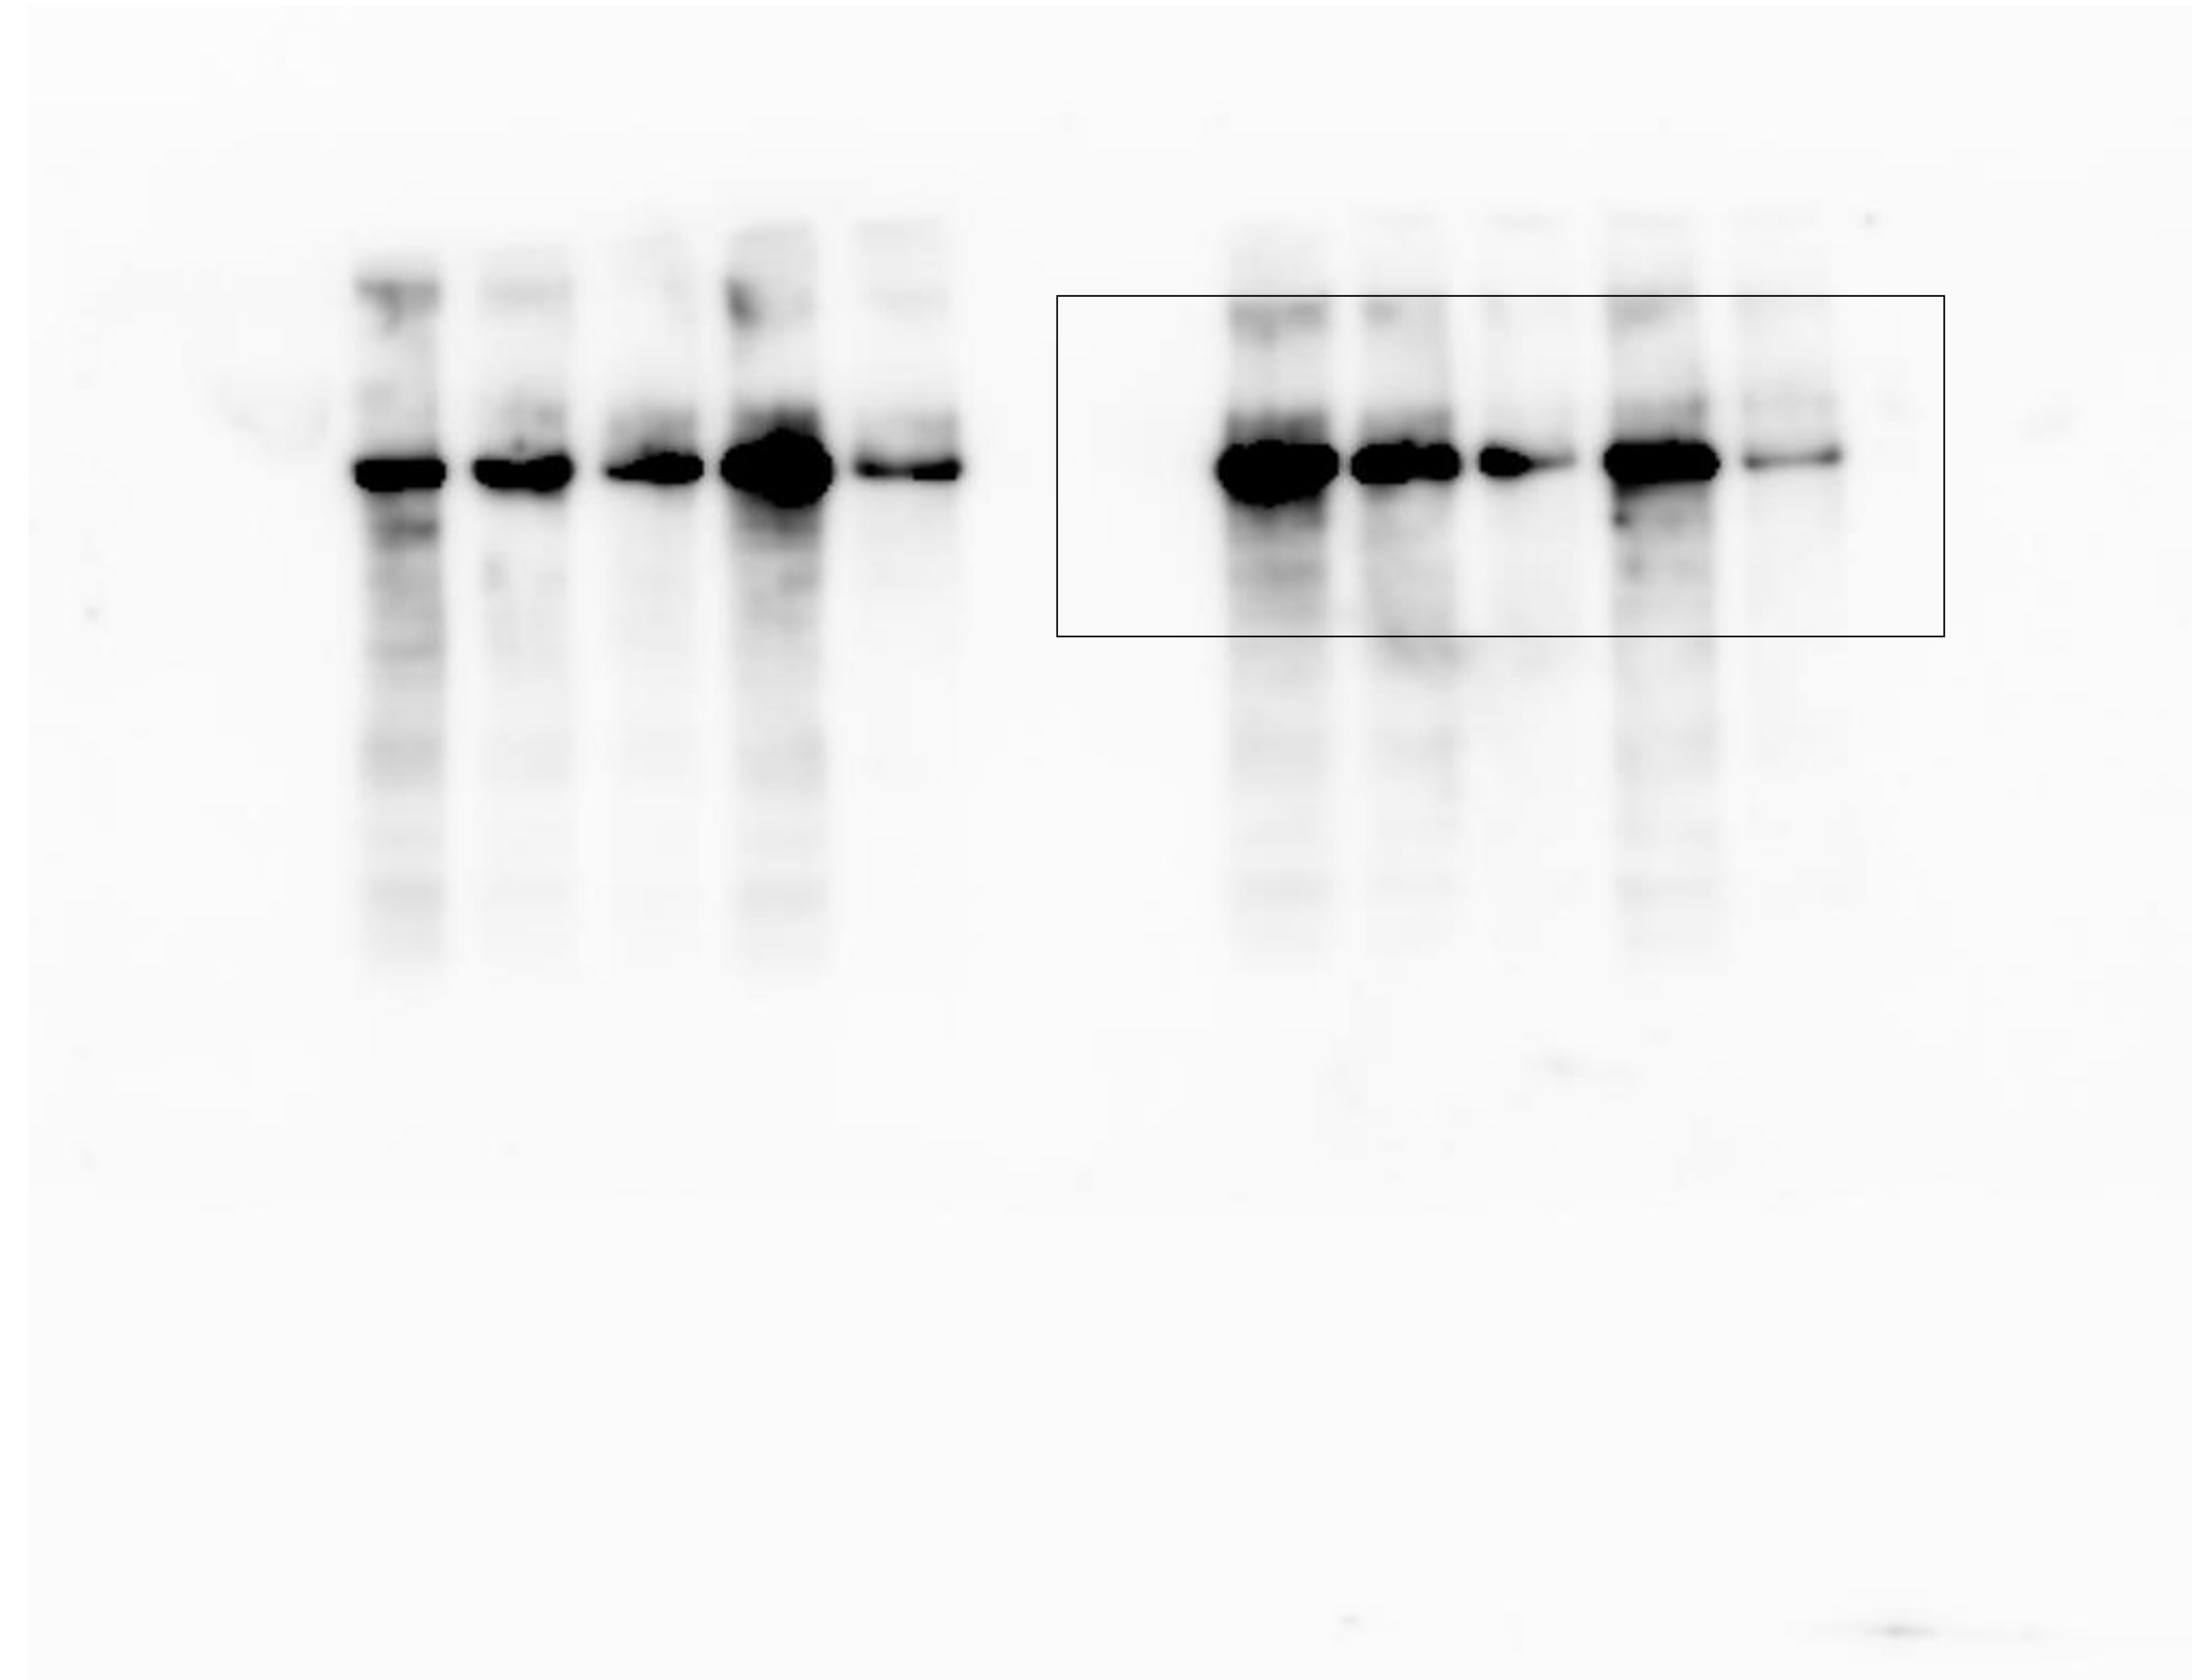

Suppl Figure 10

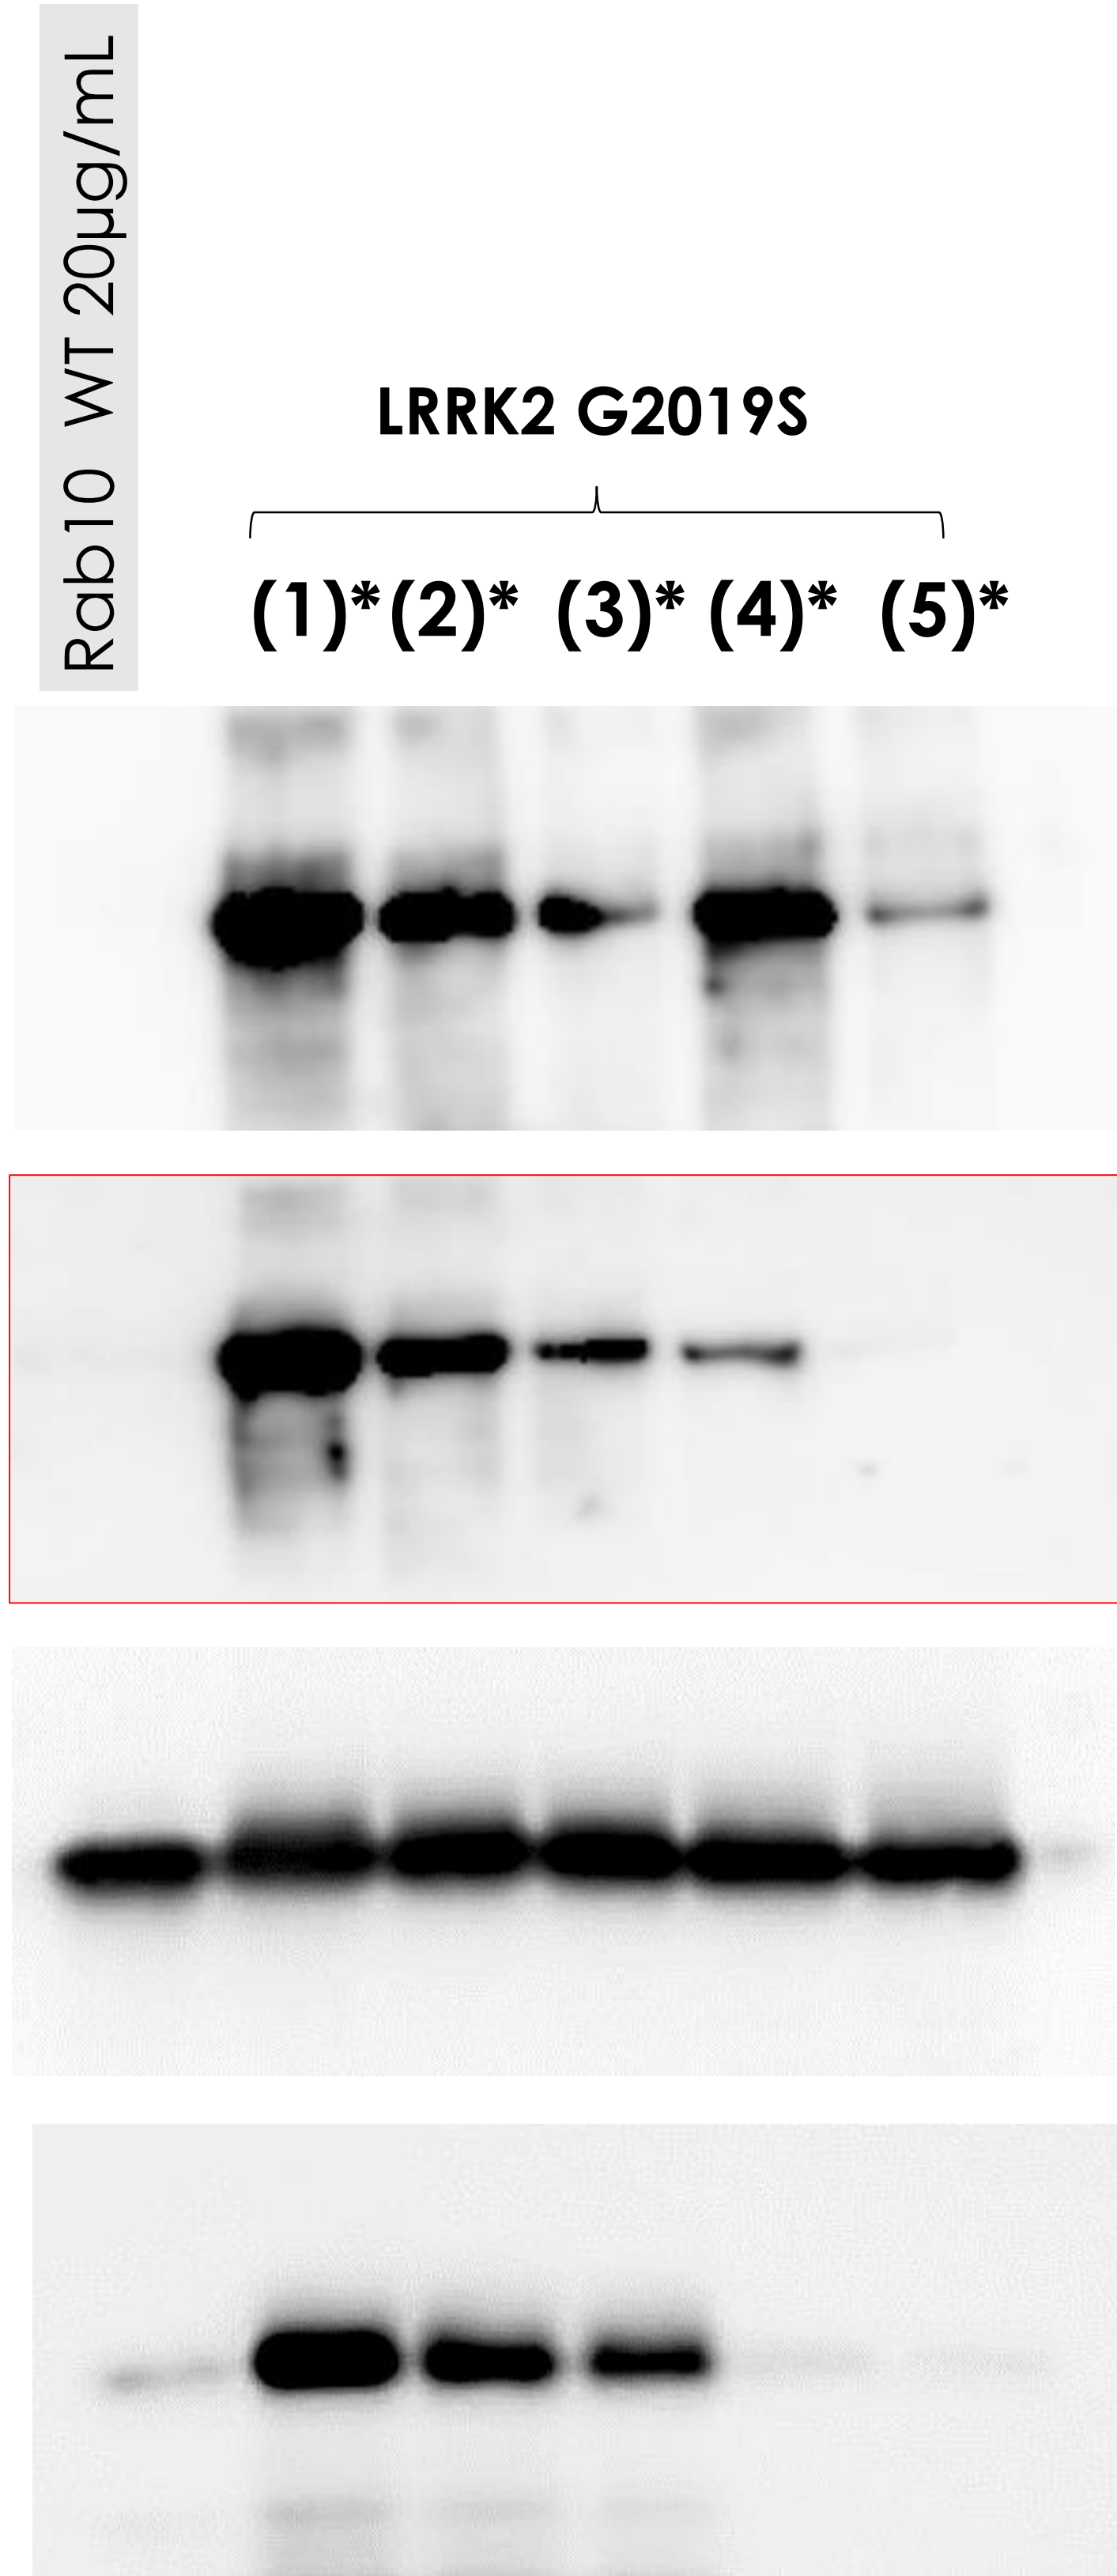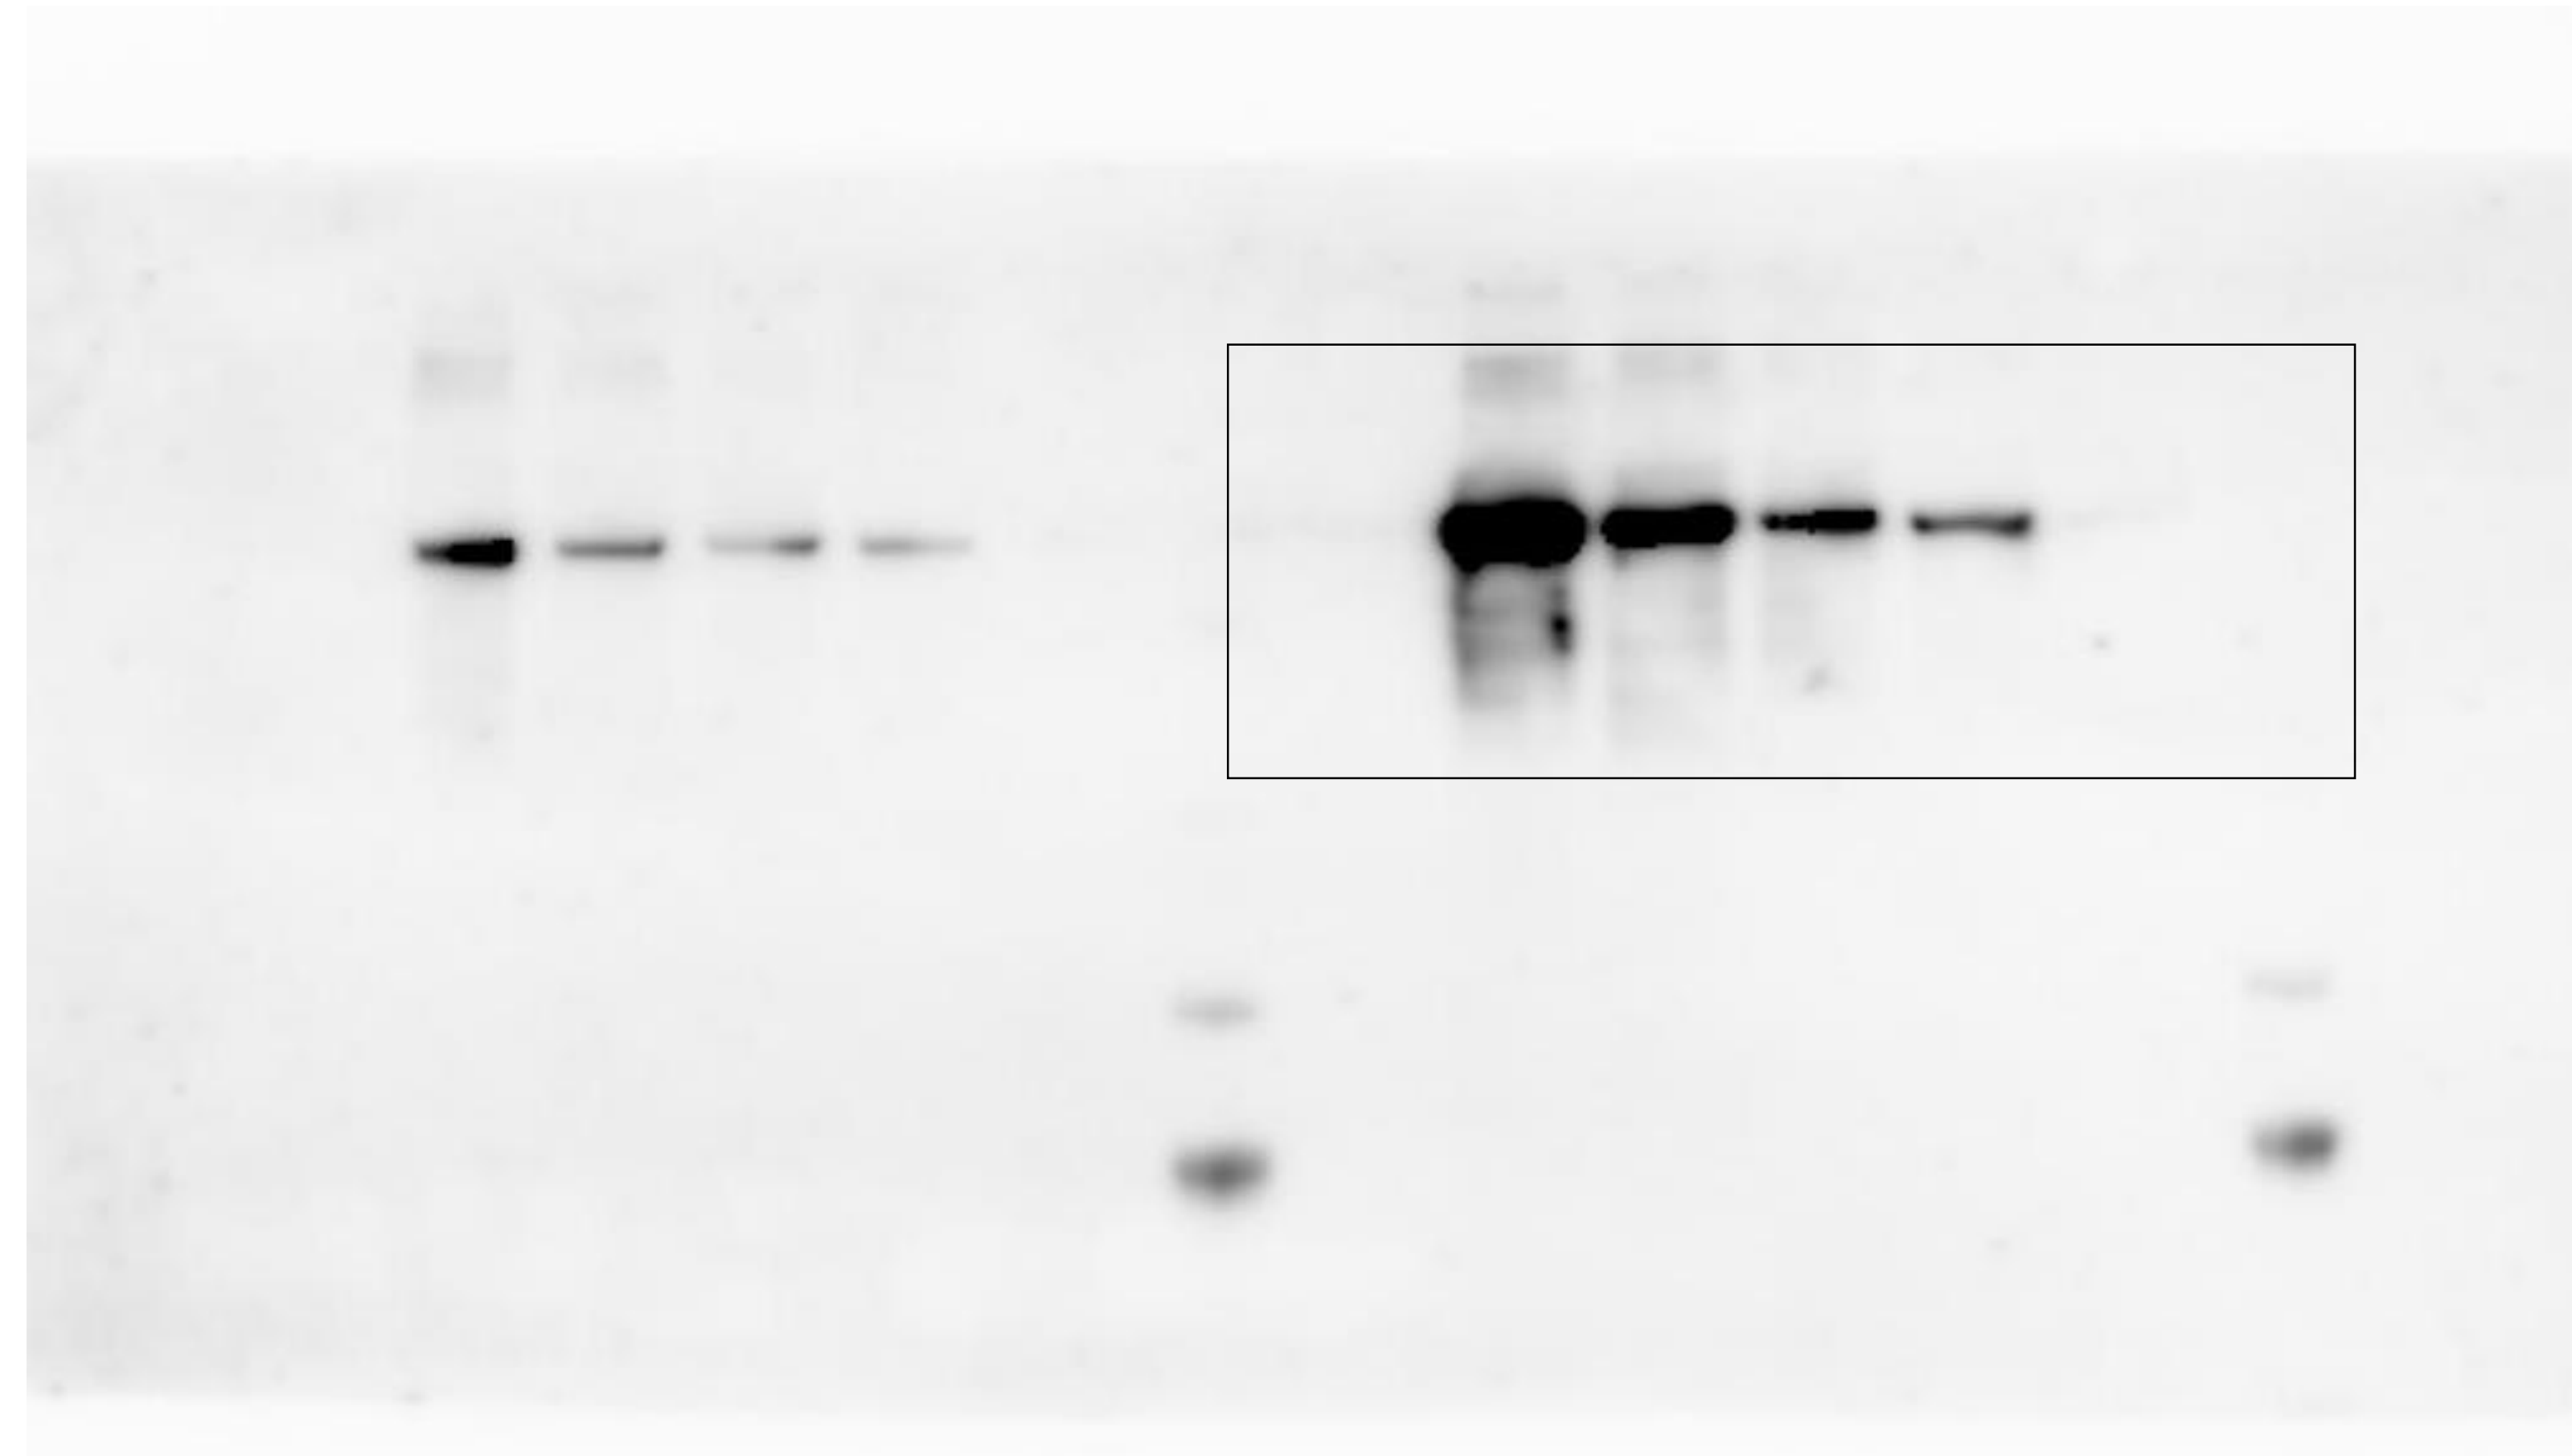

Suppl Figure 10

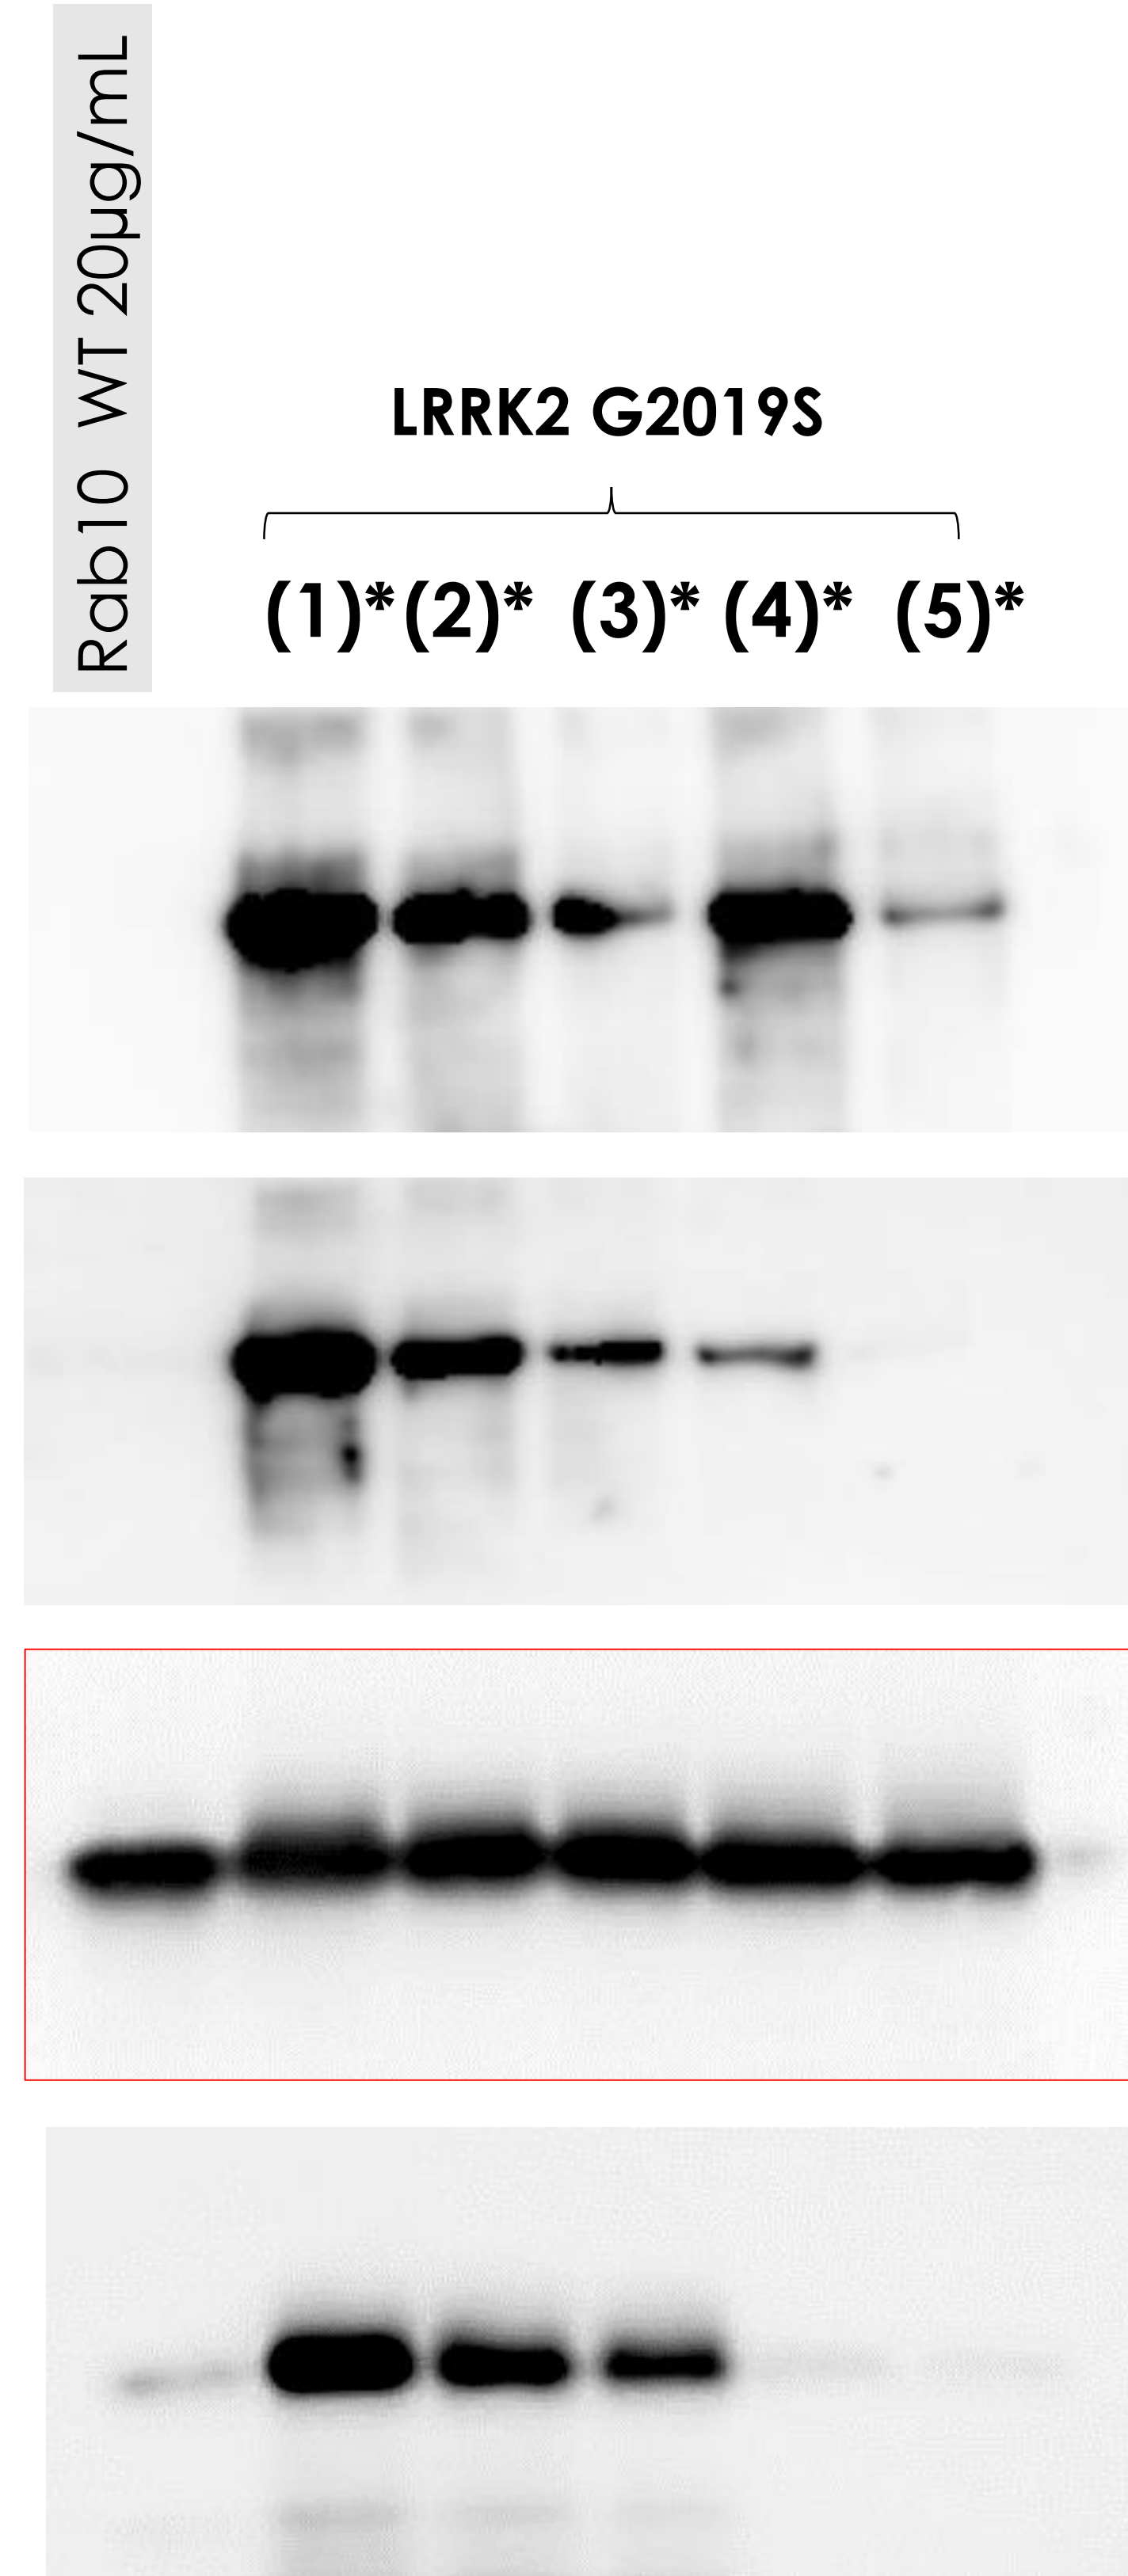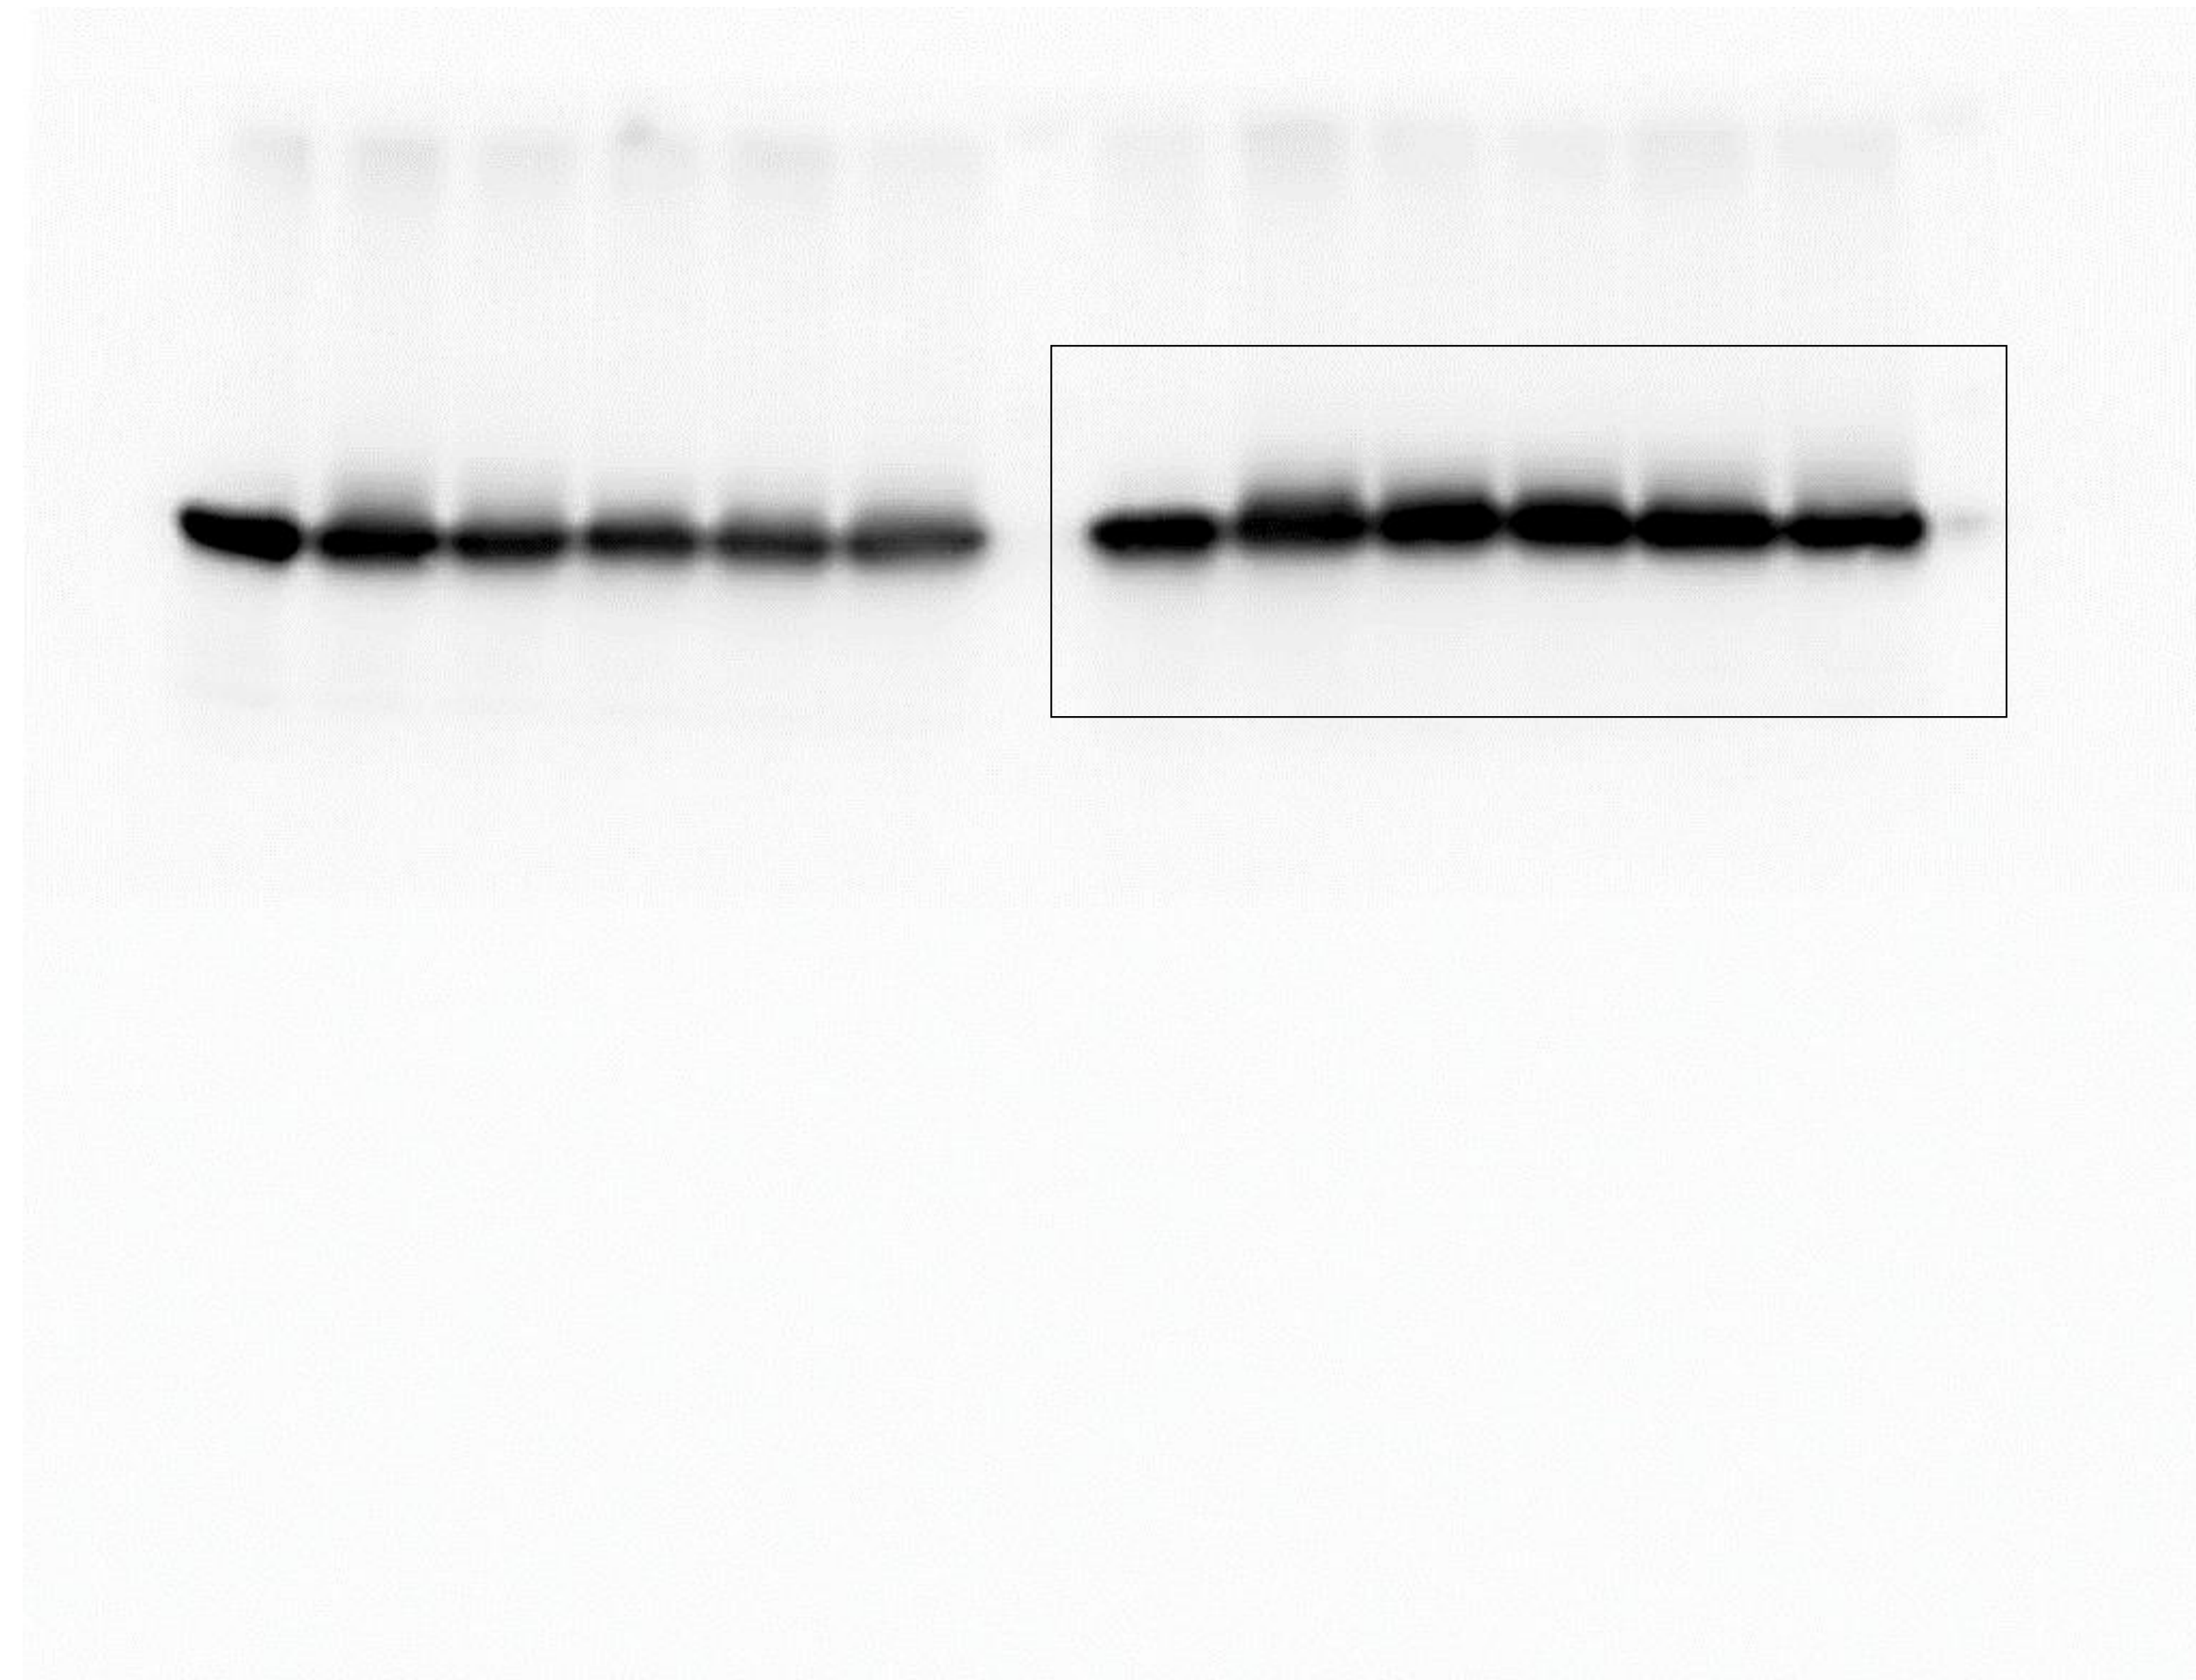



Suppl Figure 10

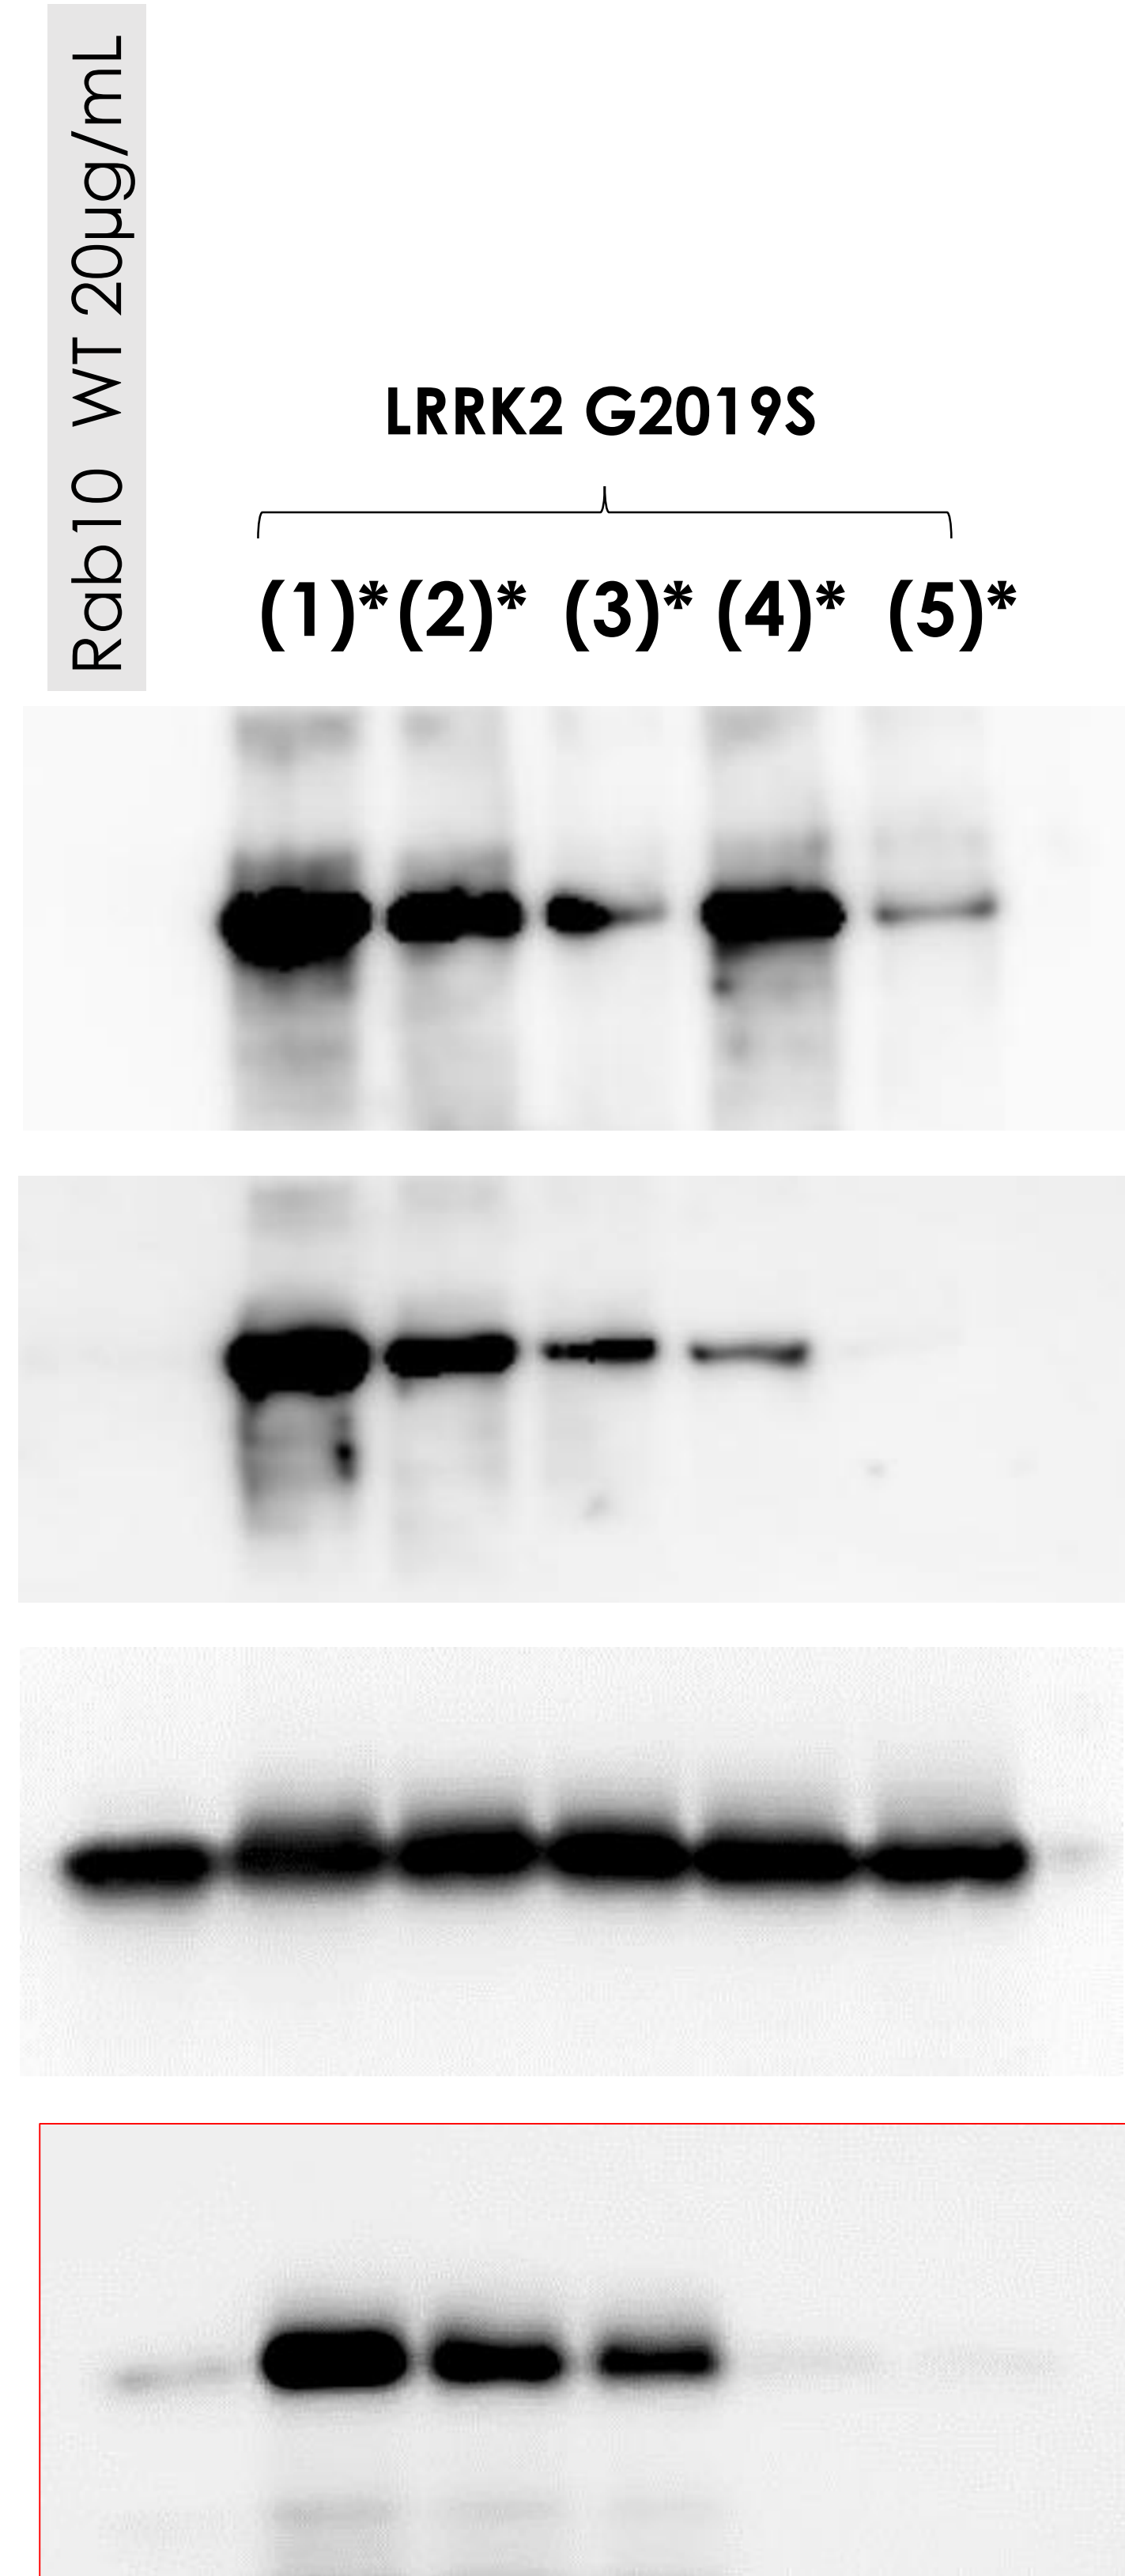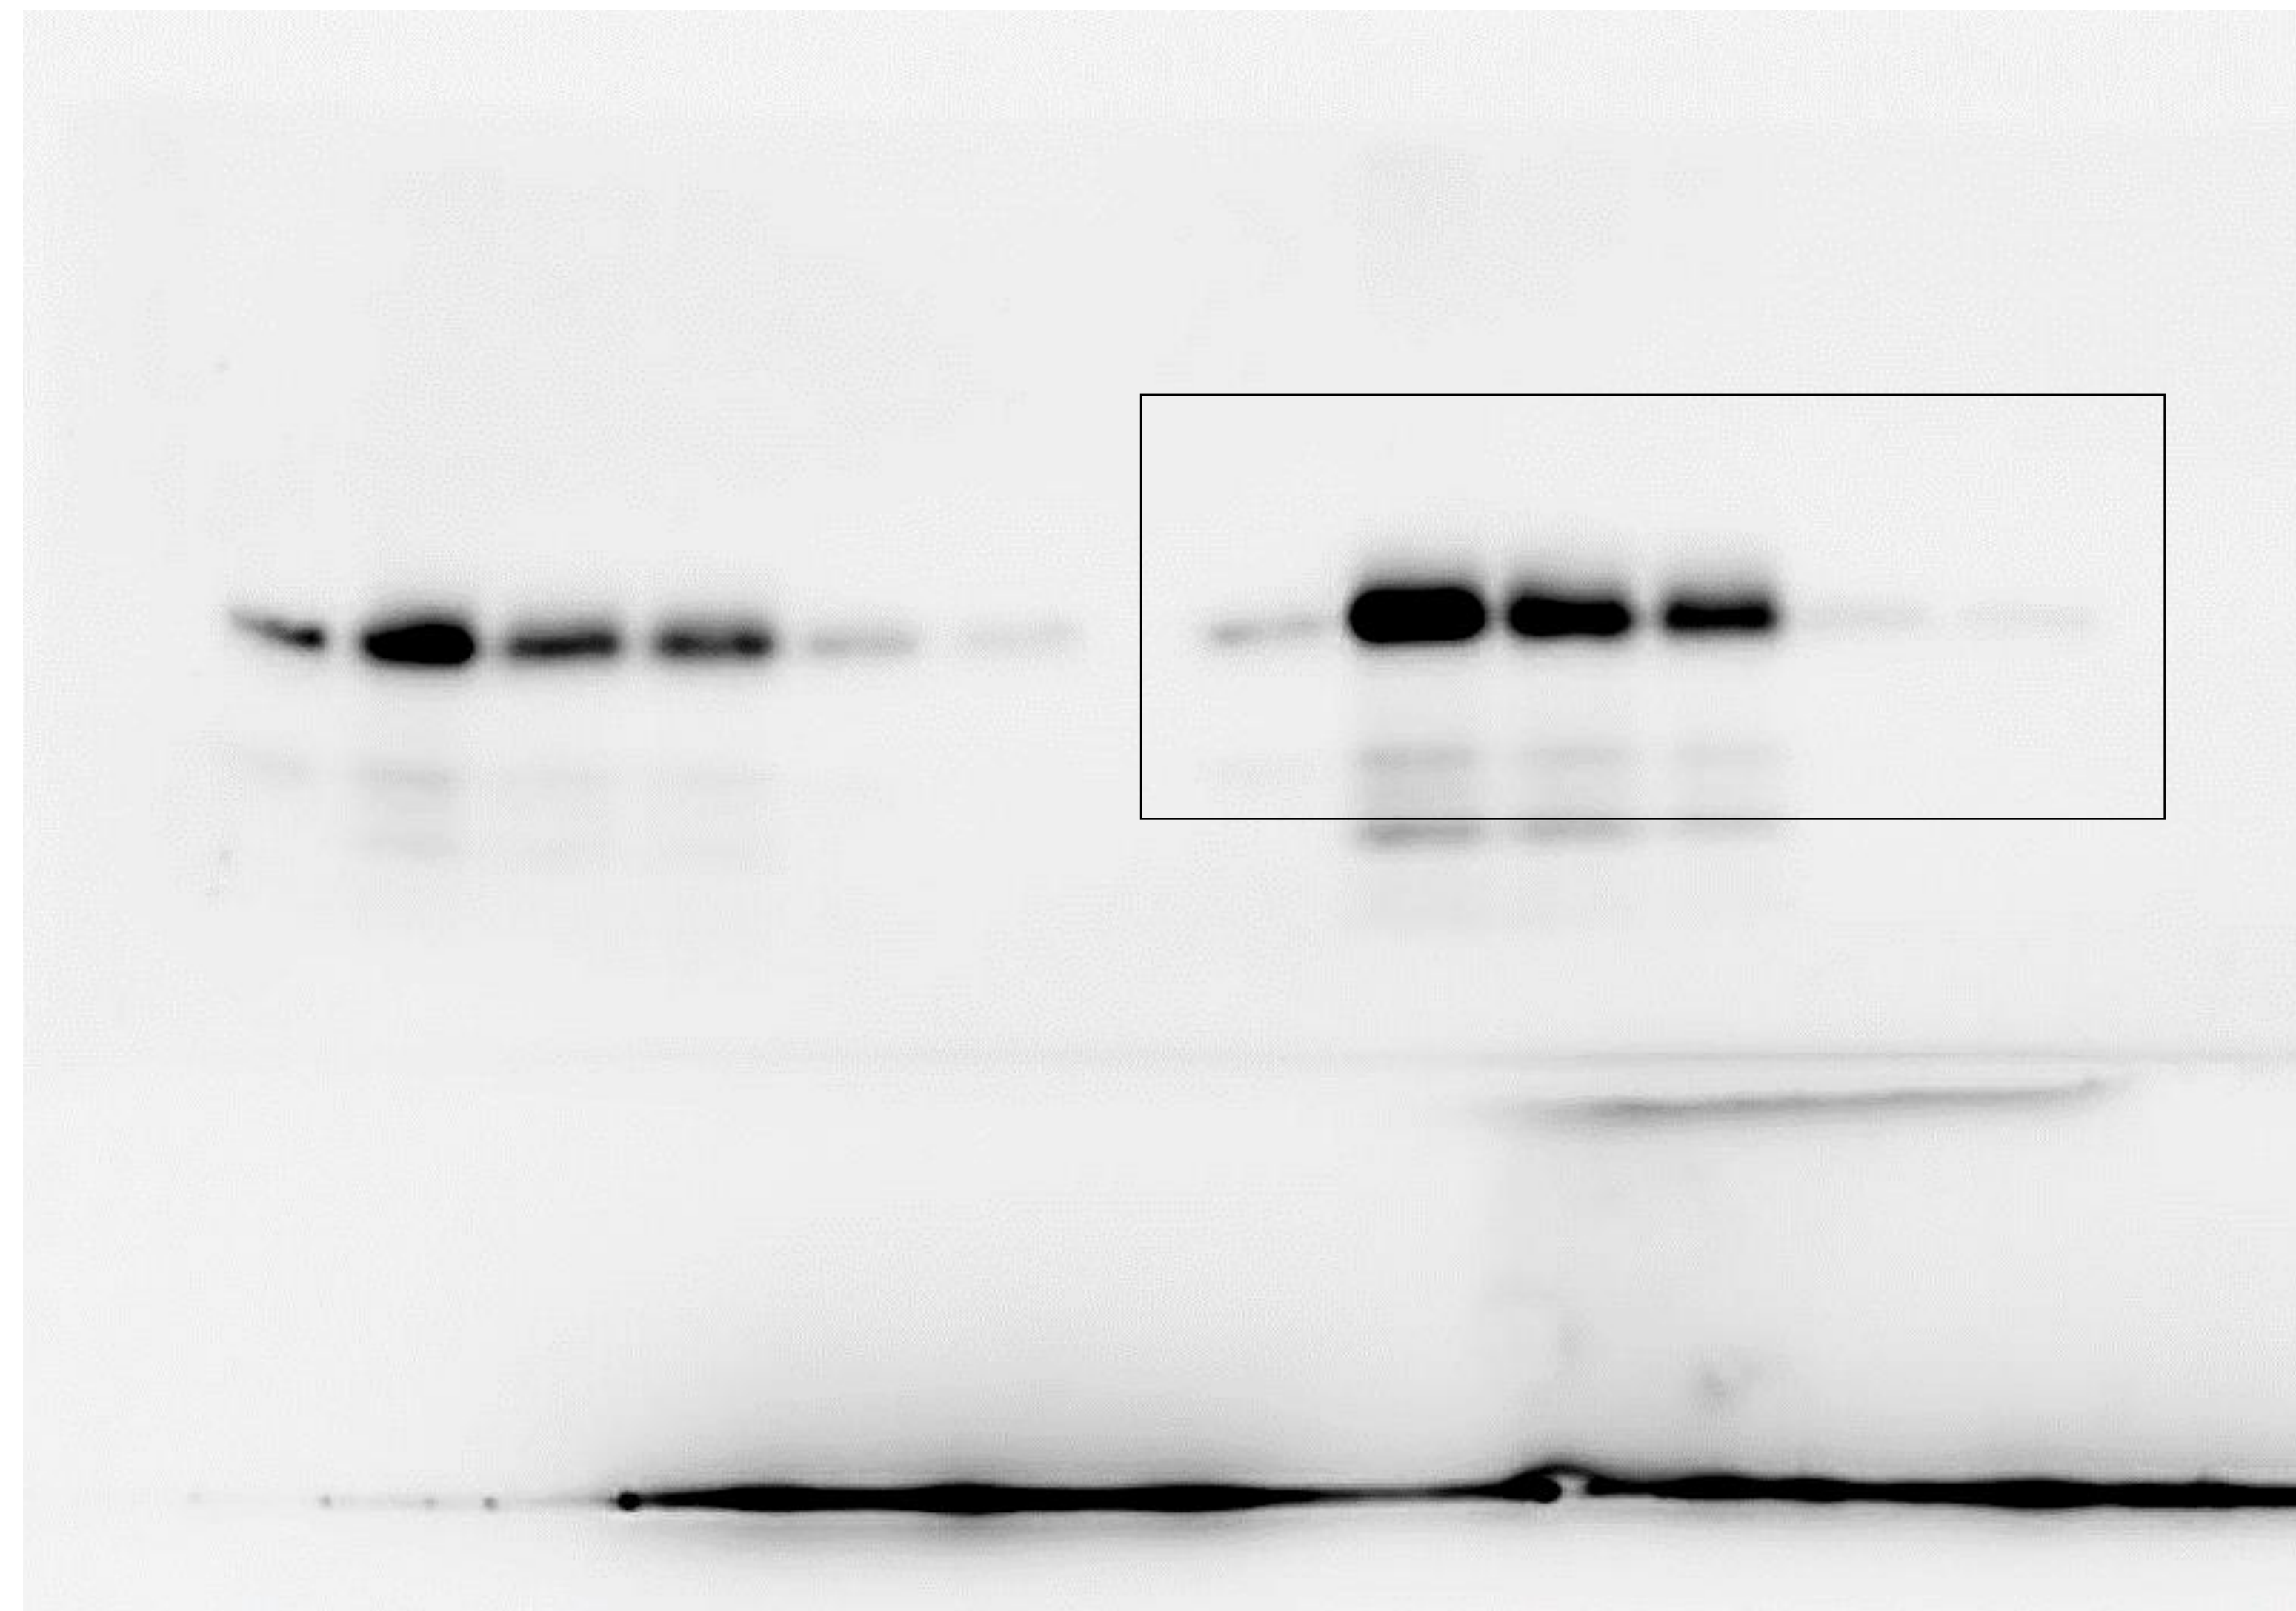

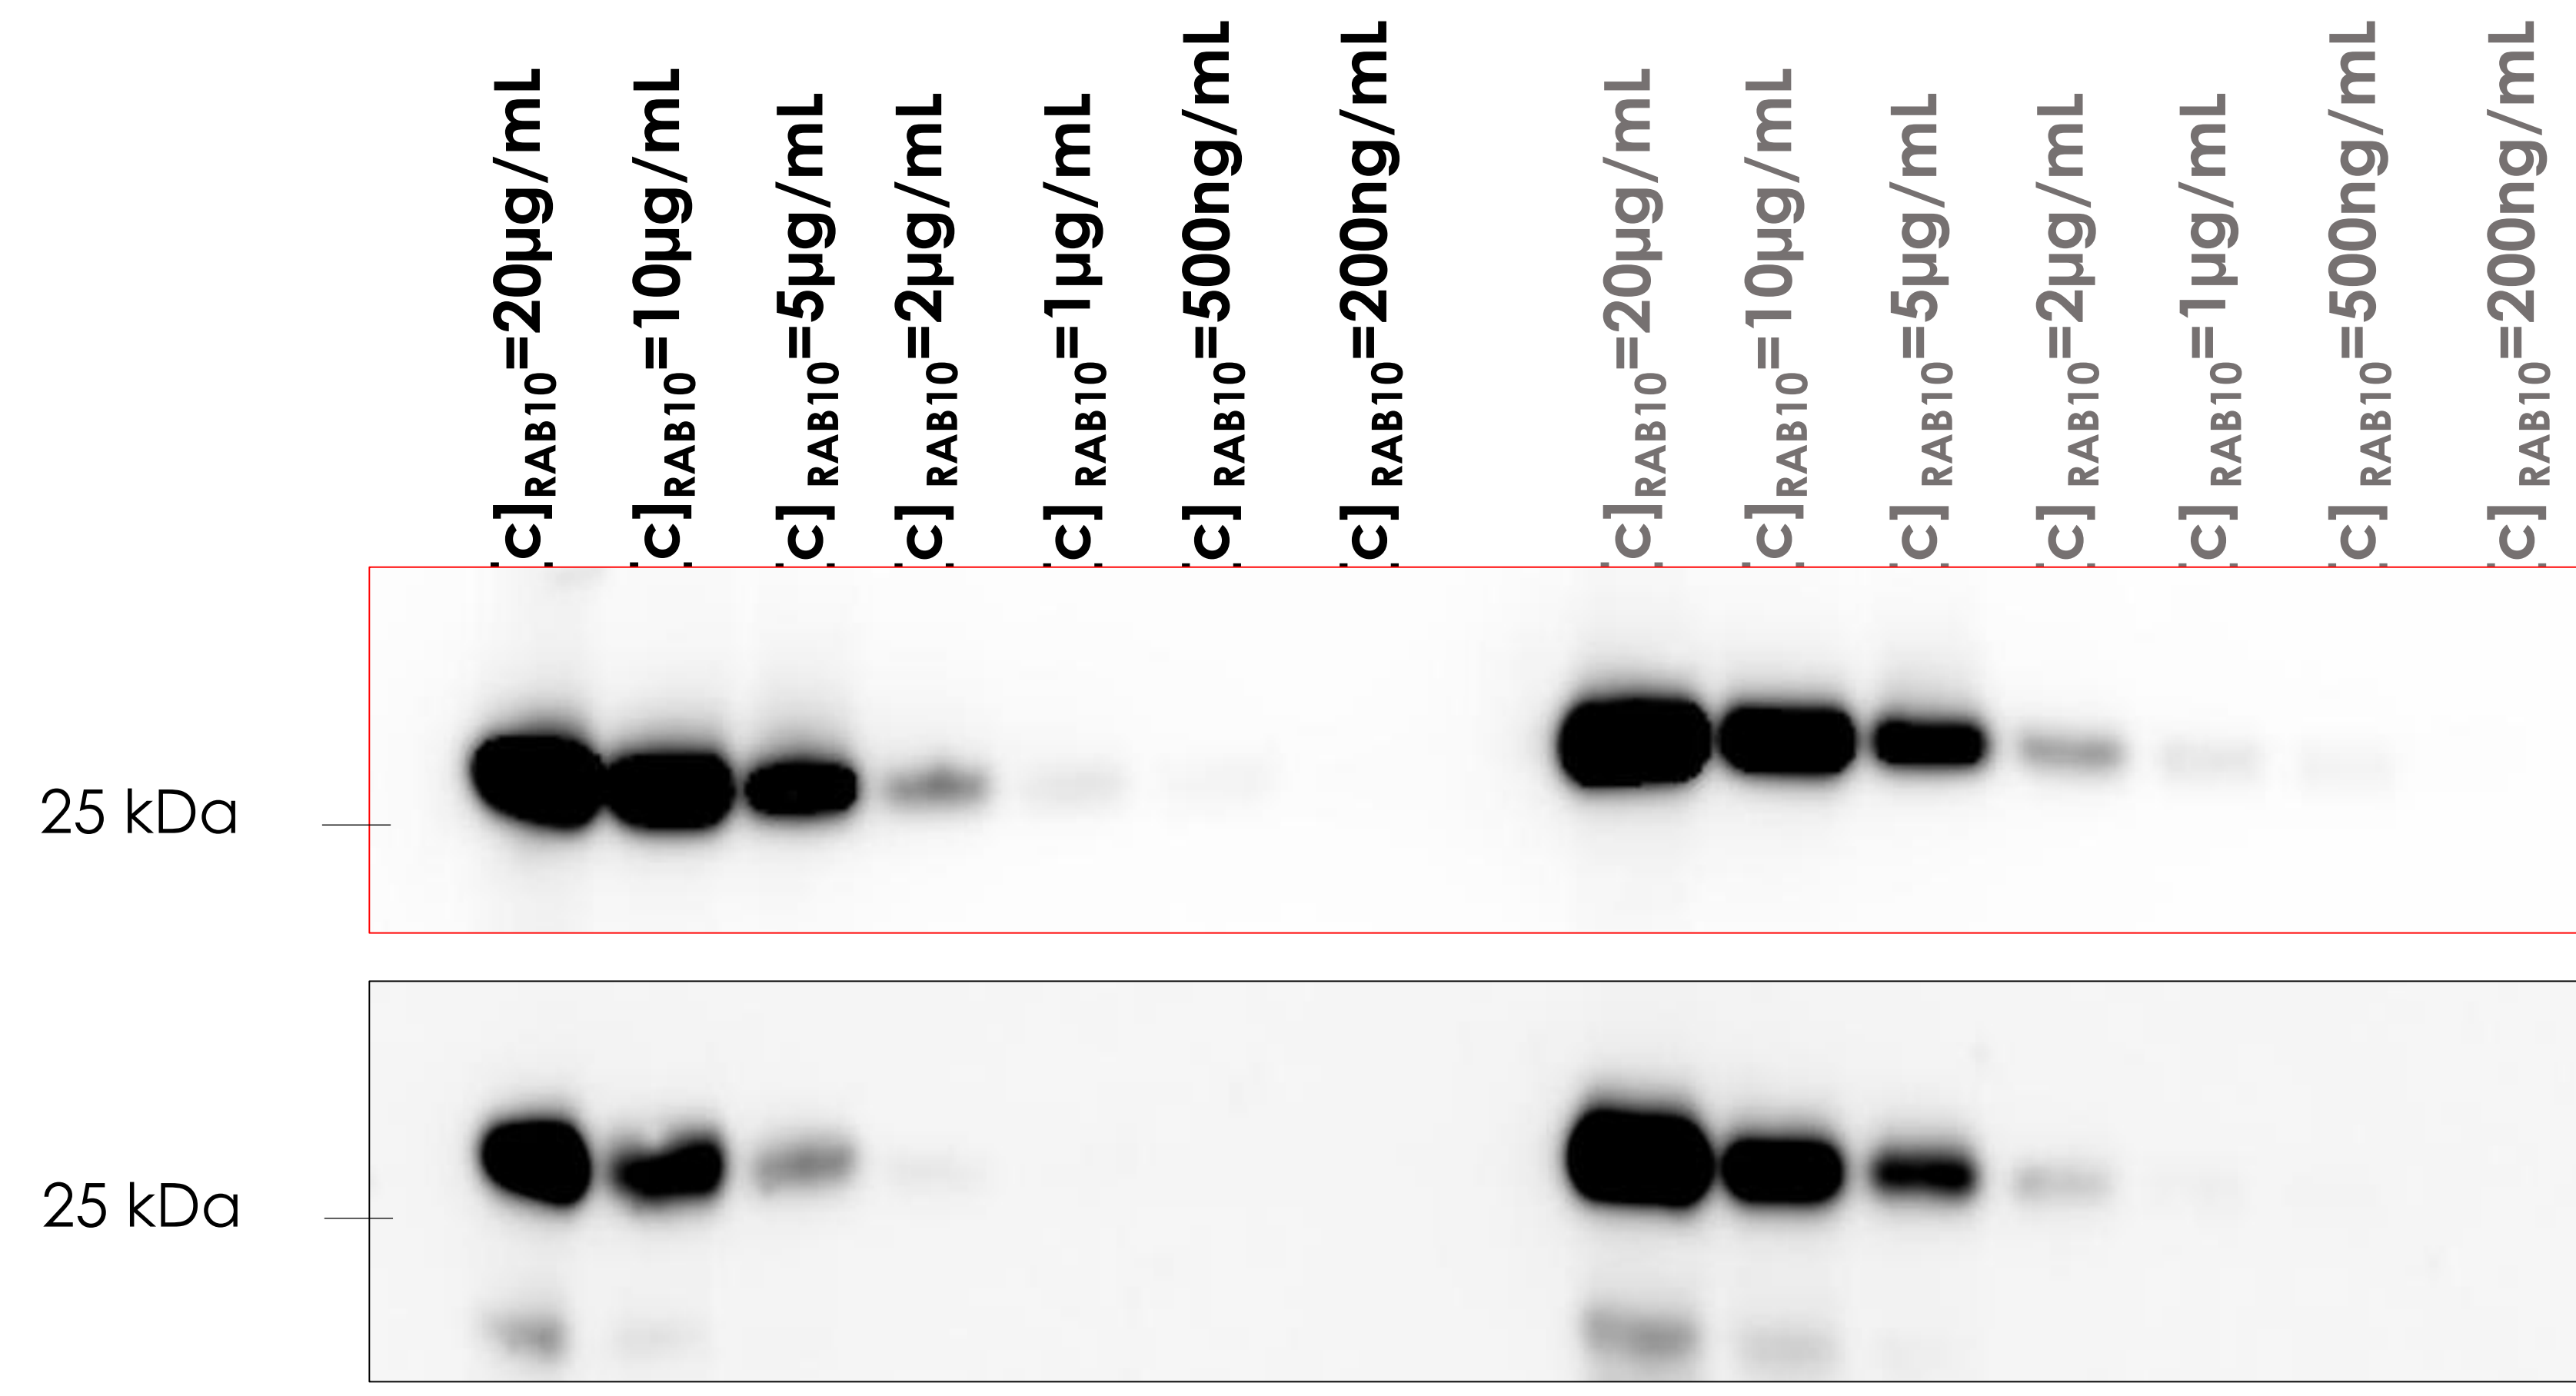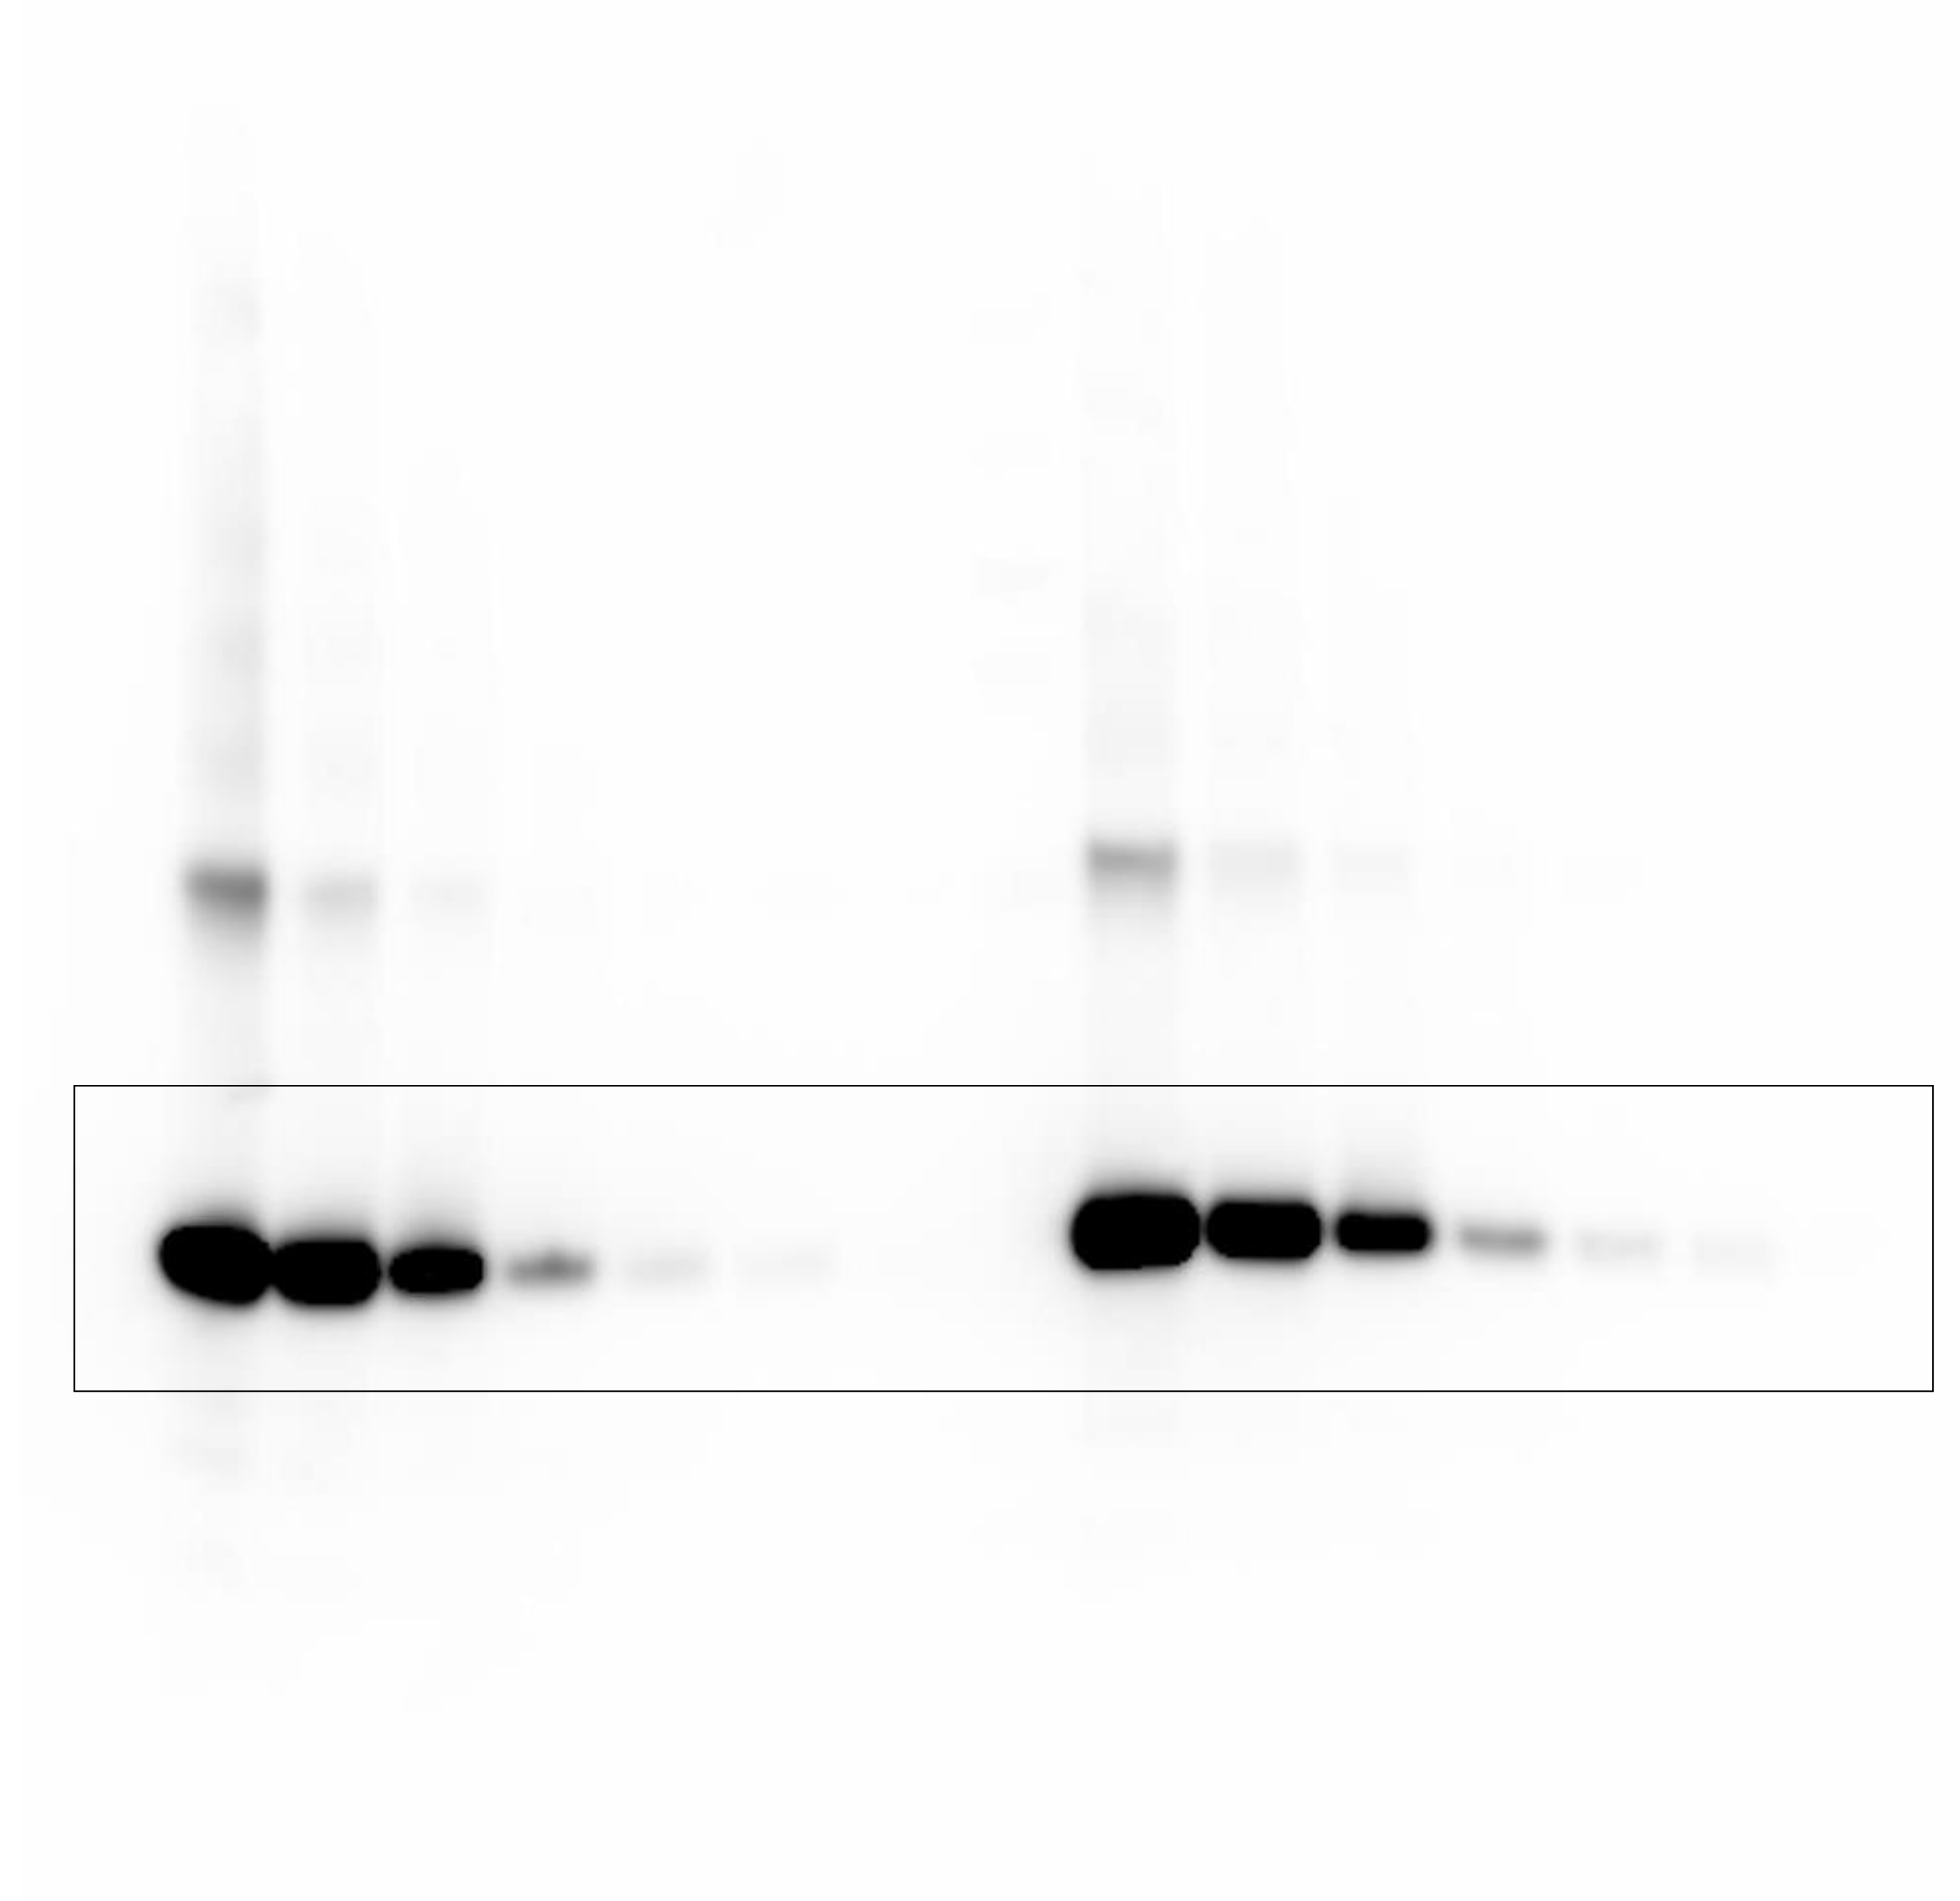

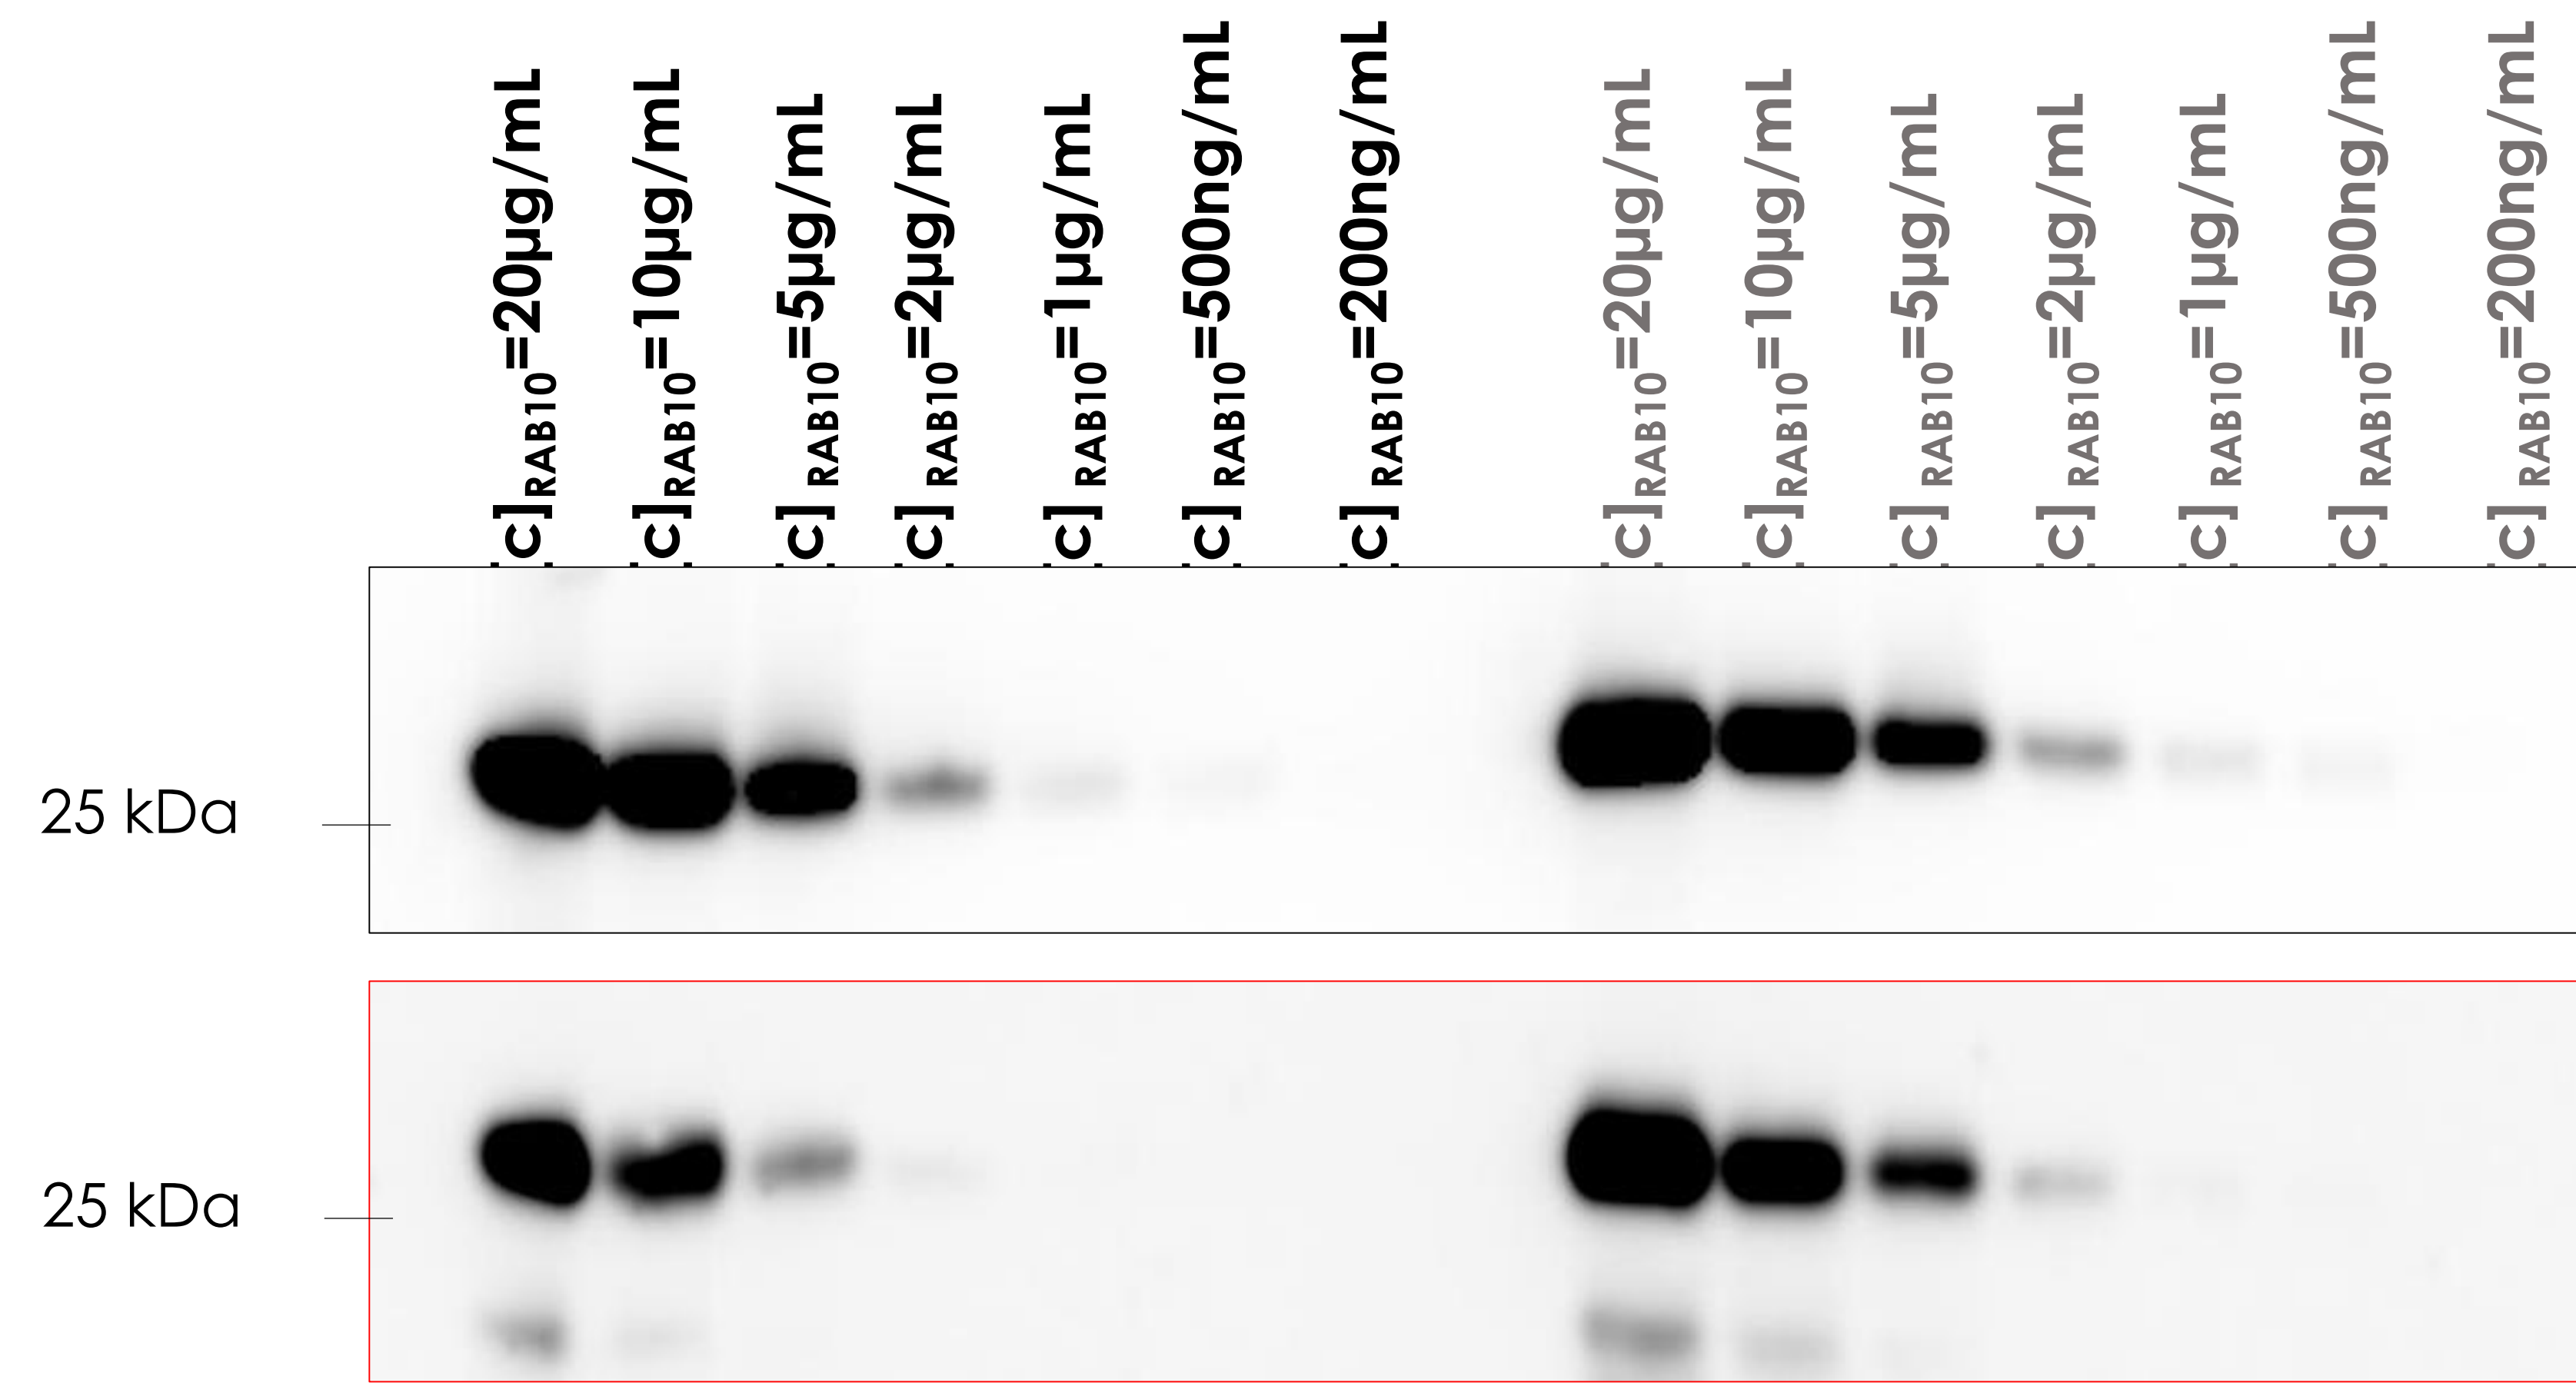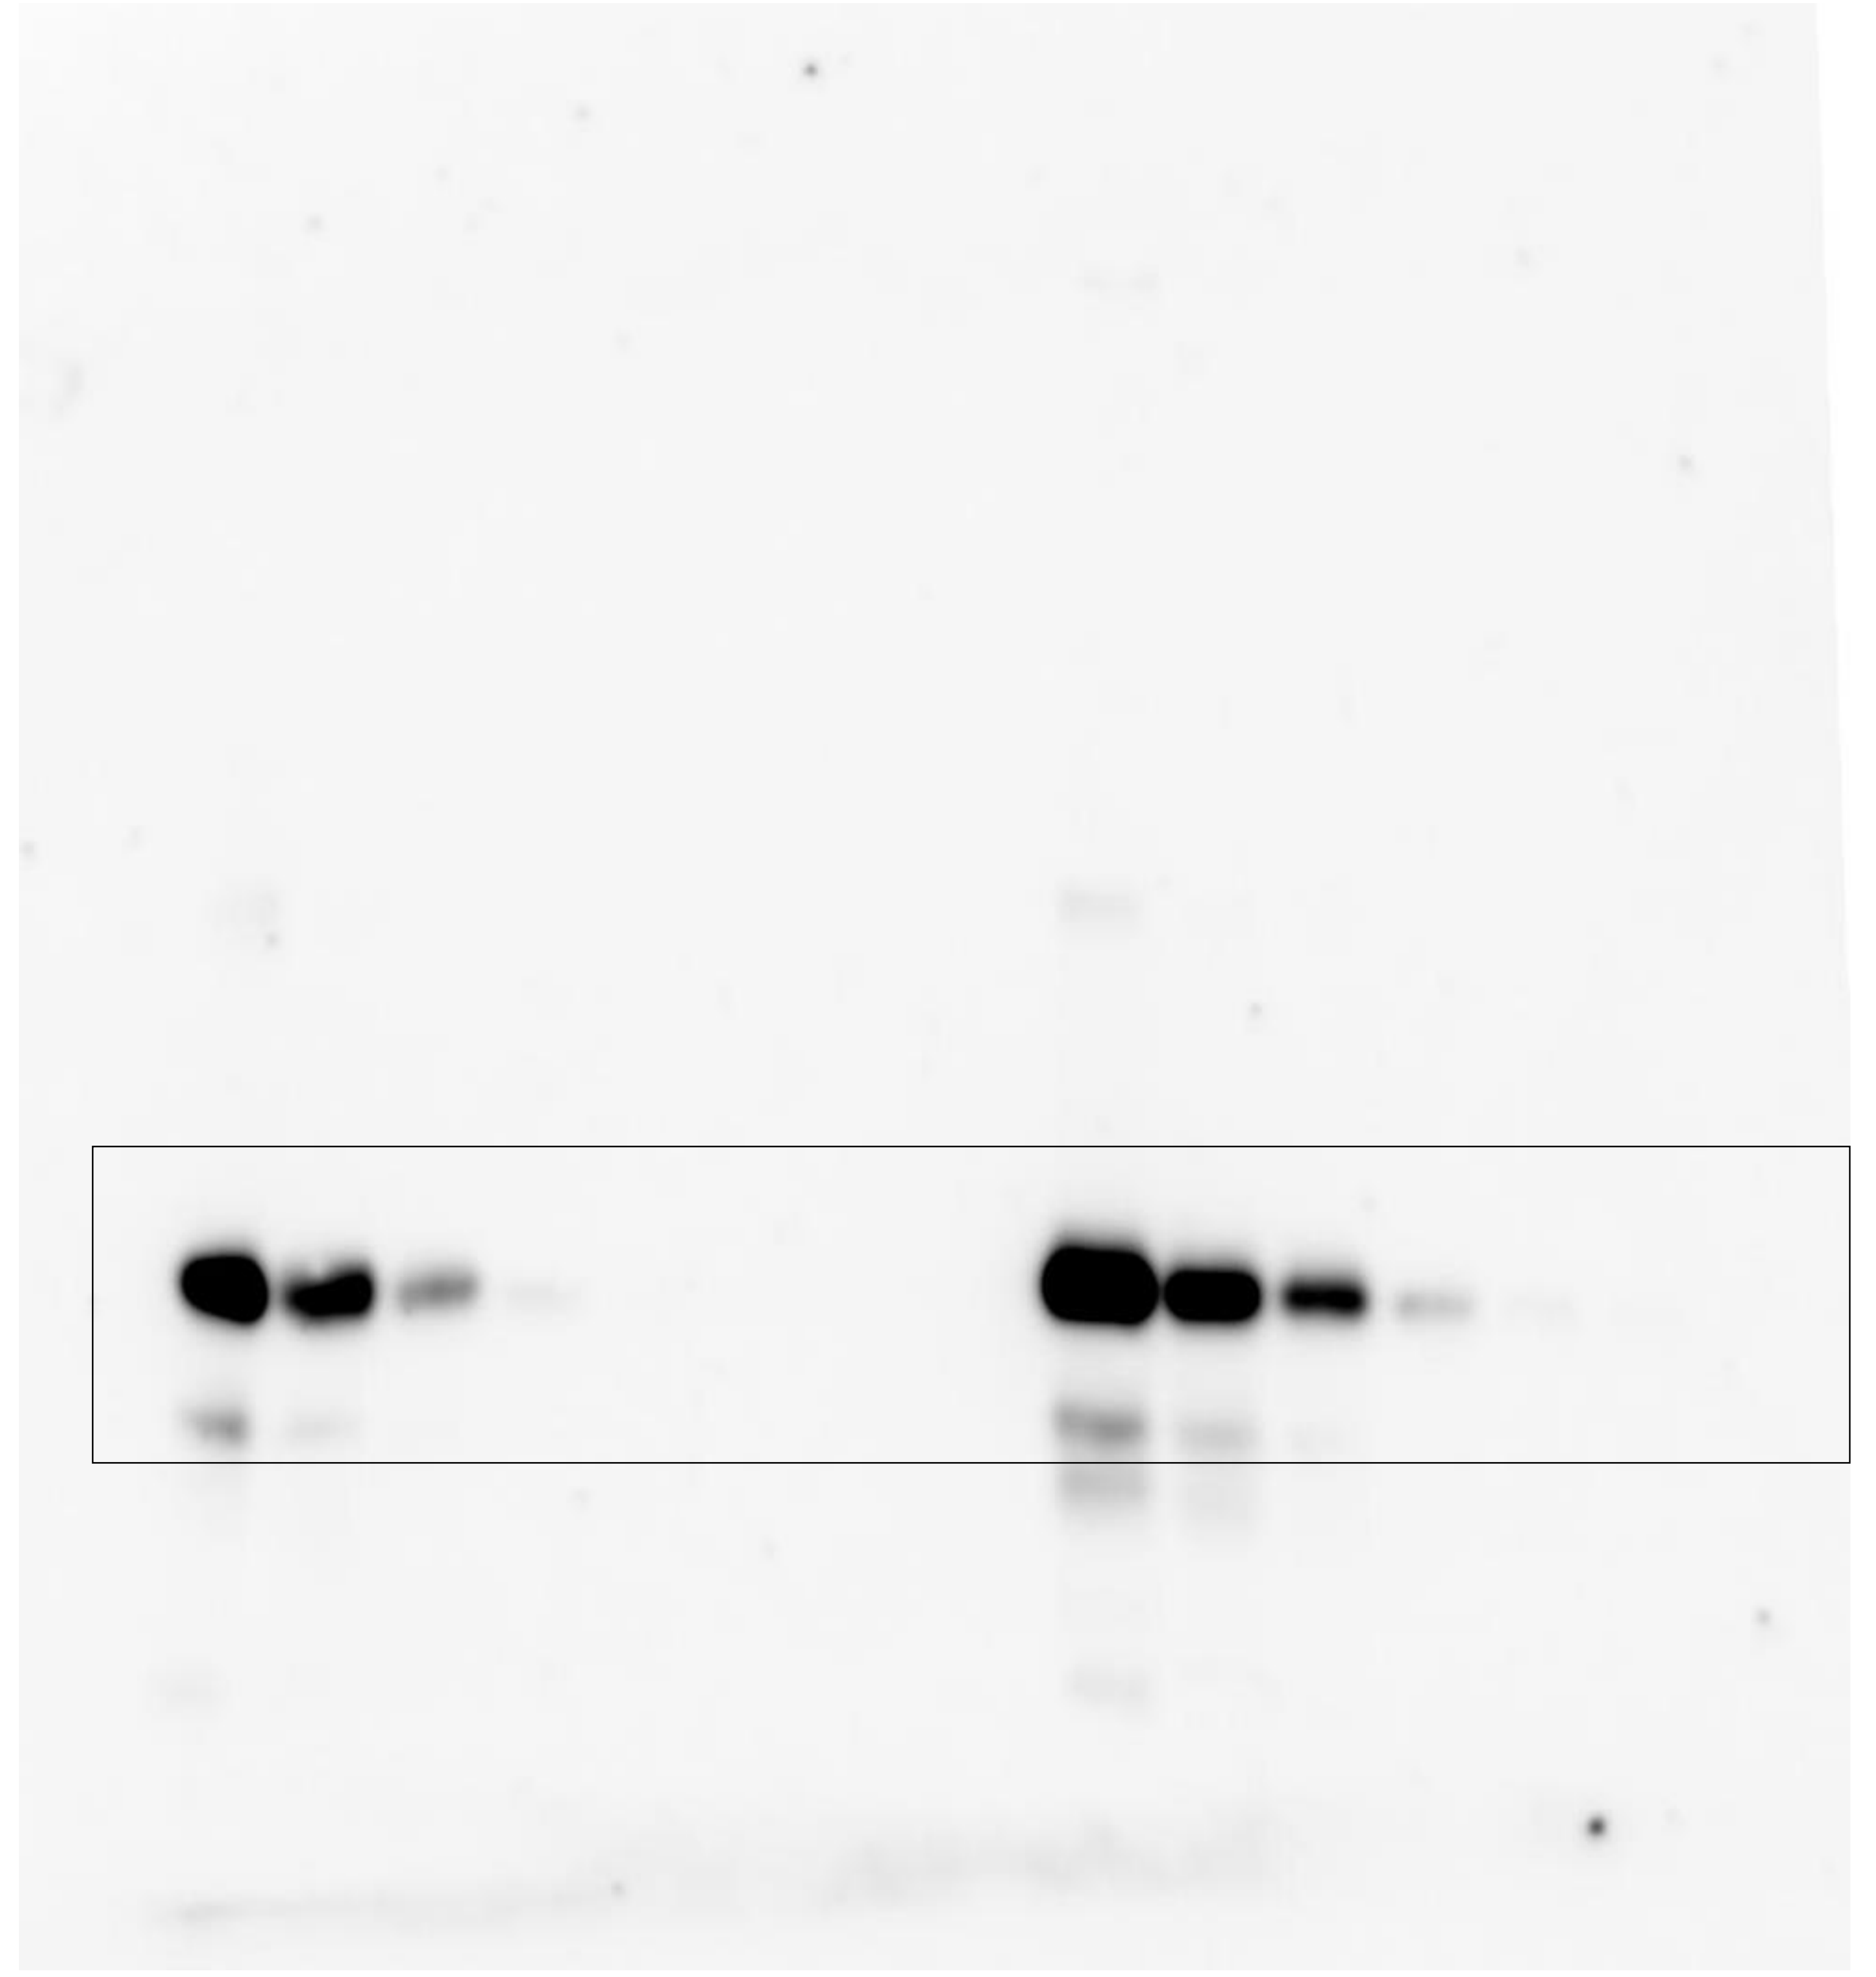

Suppl Figure 13a

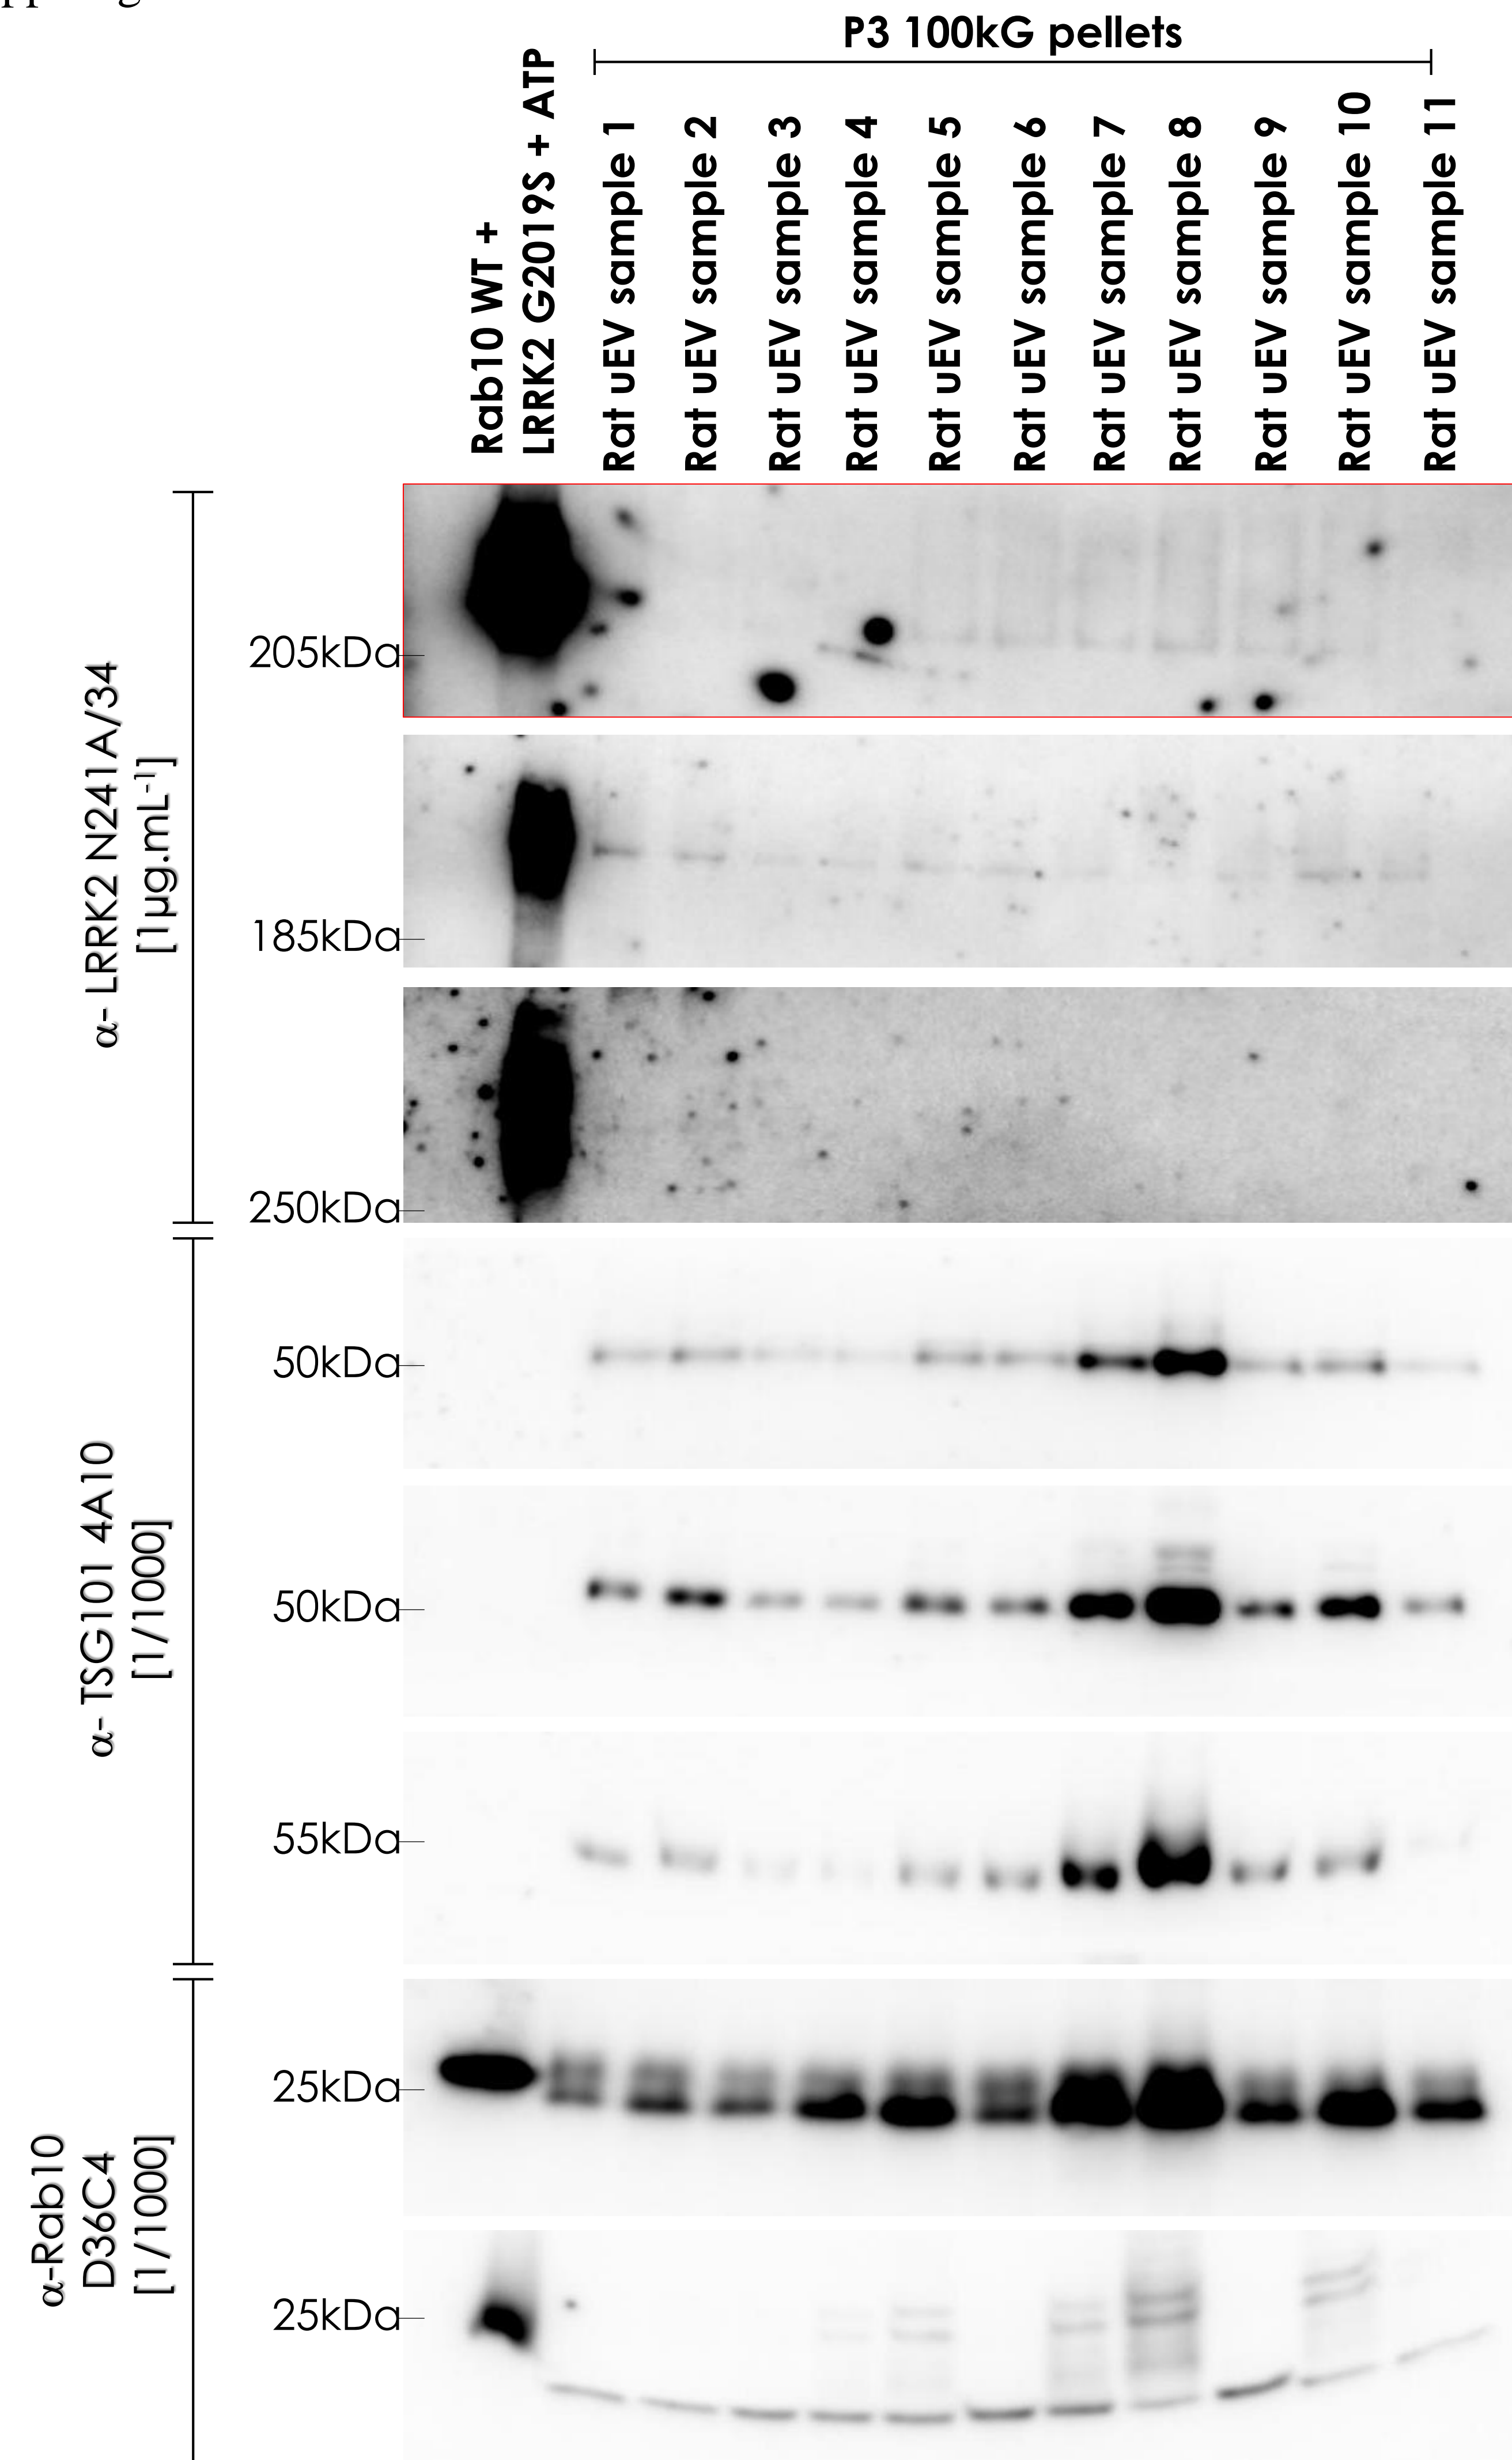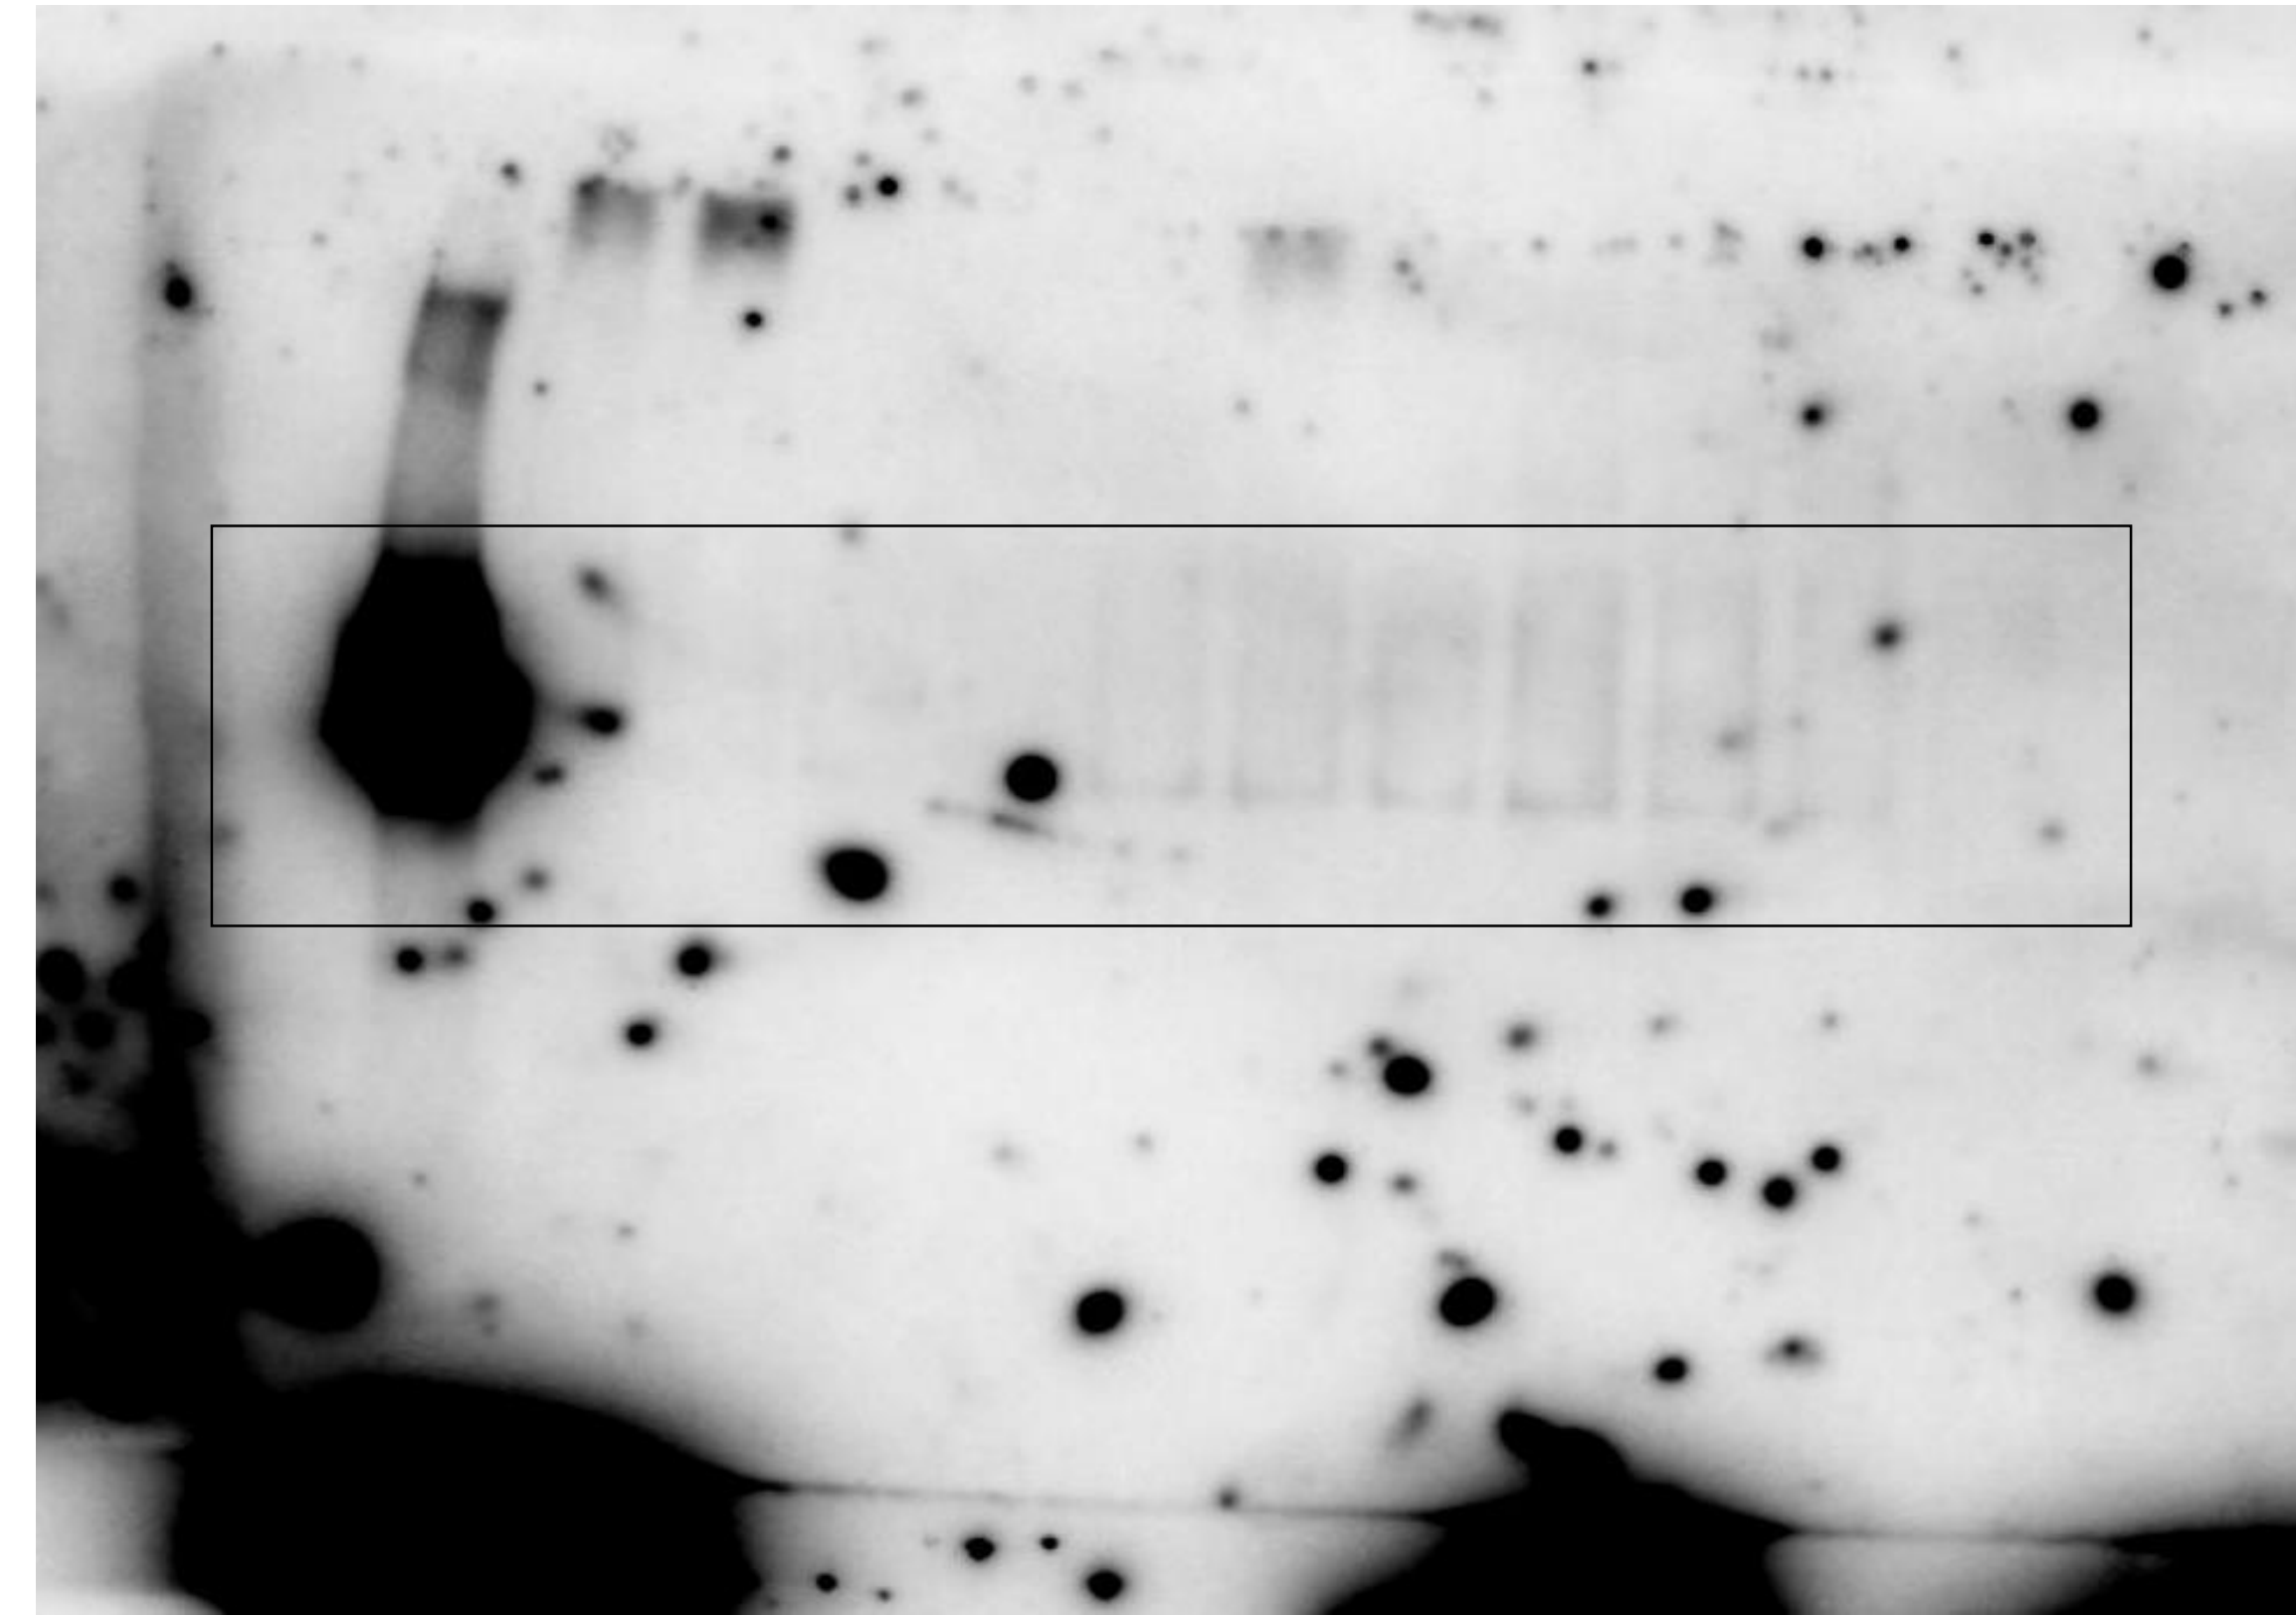

Suppl Figure 13a

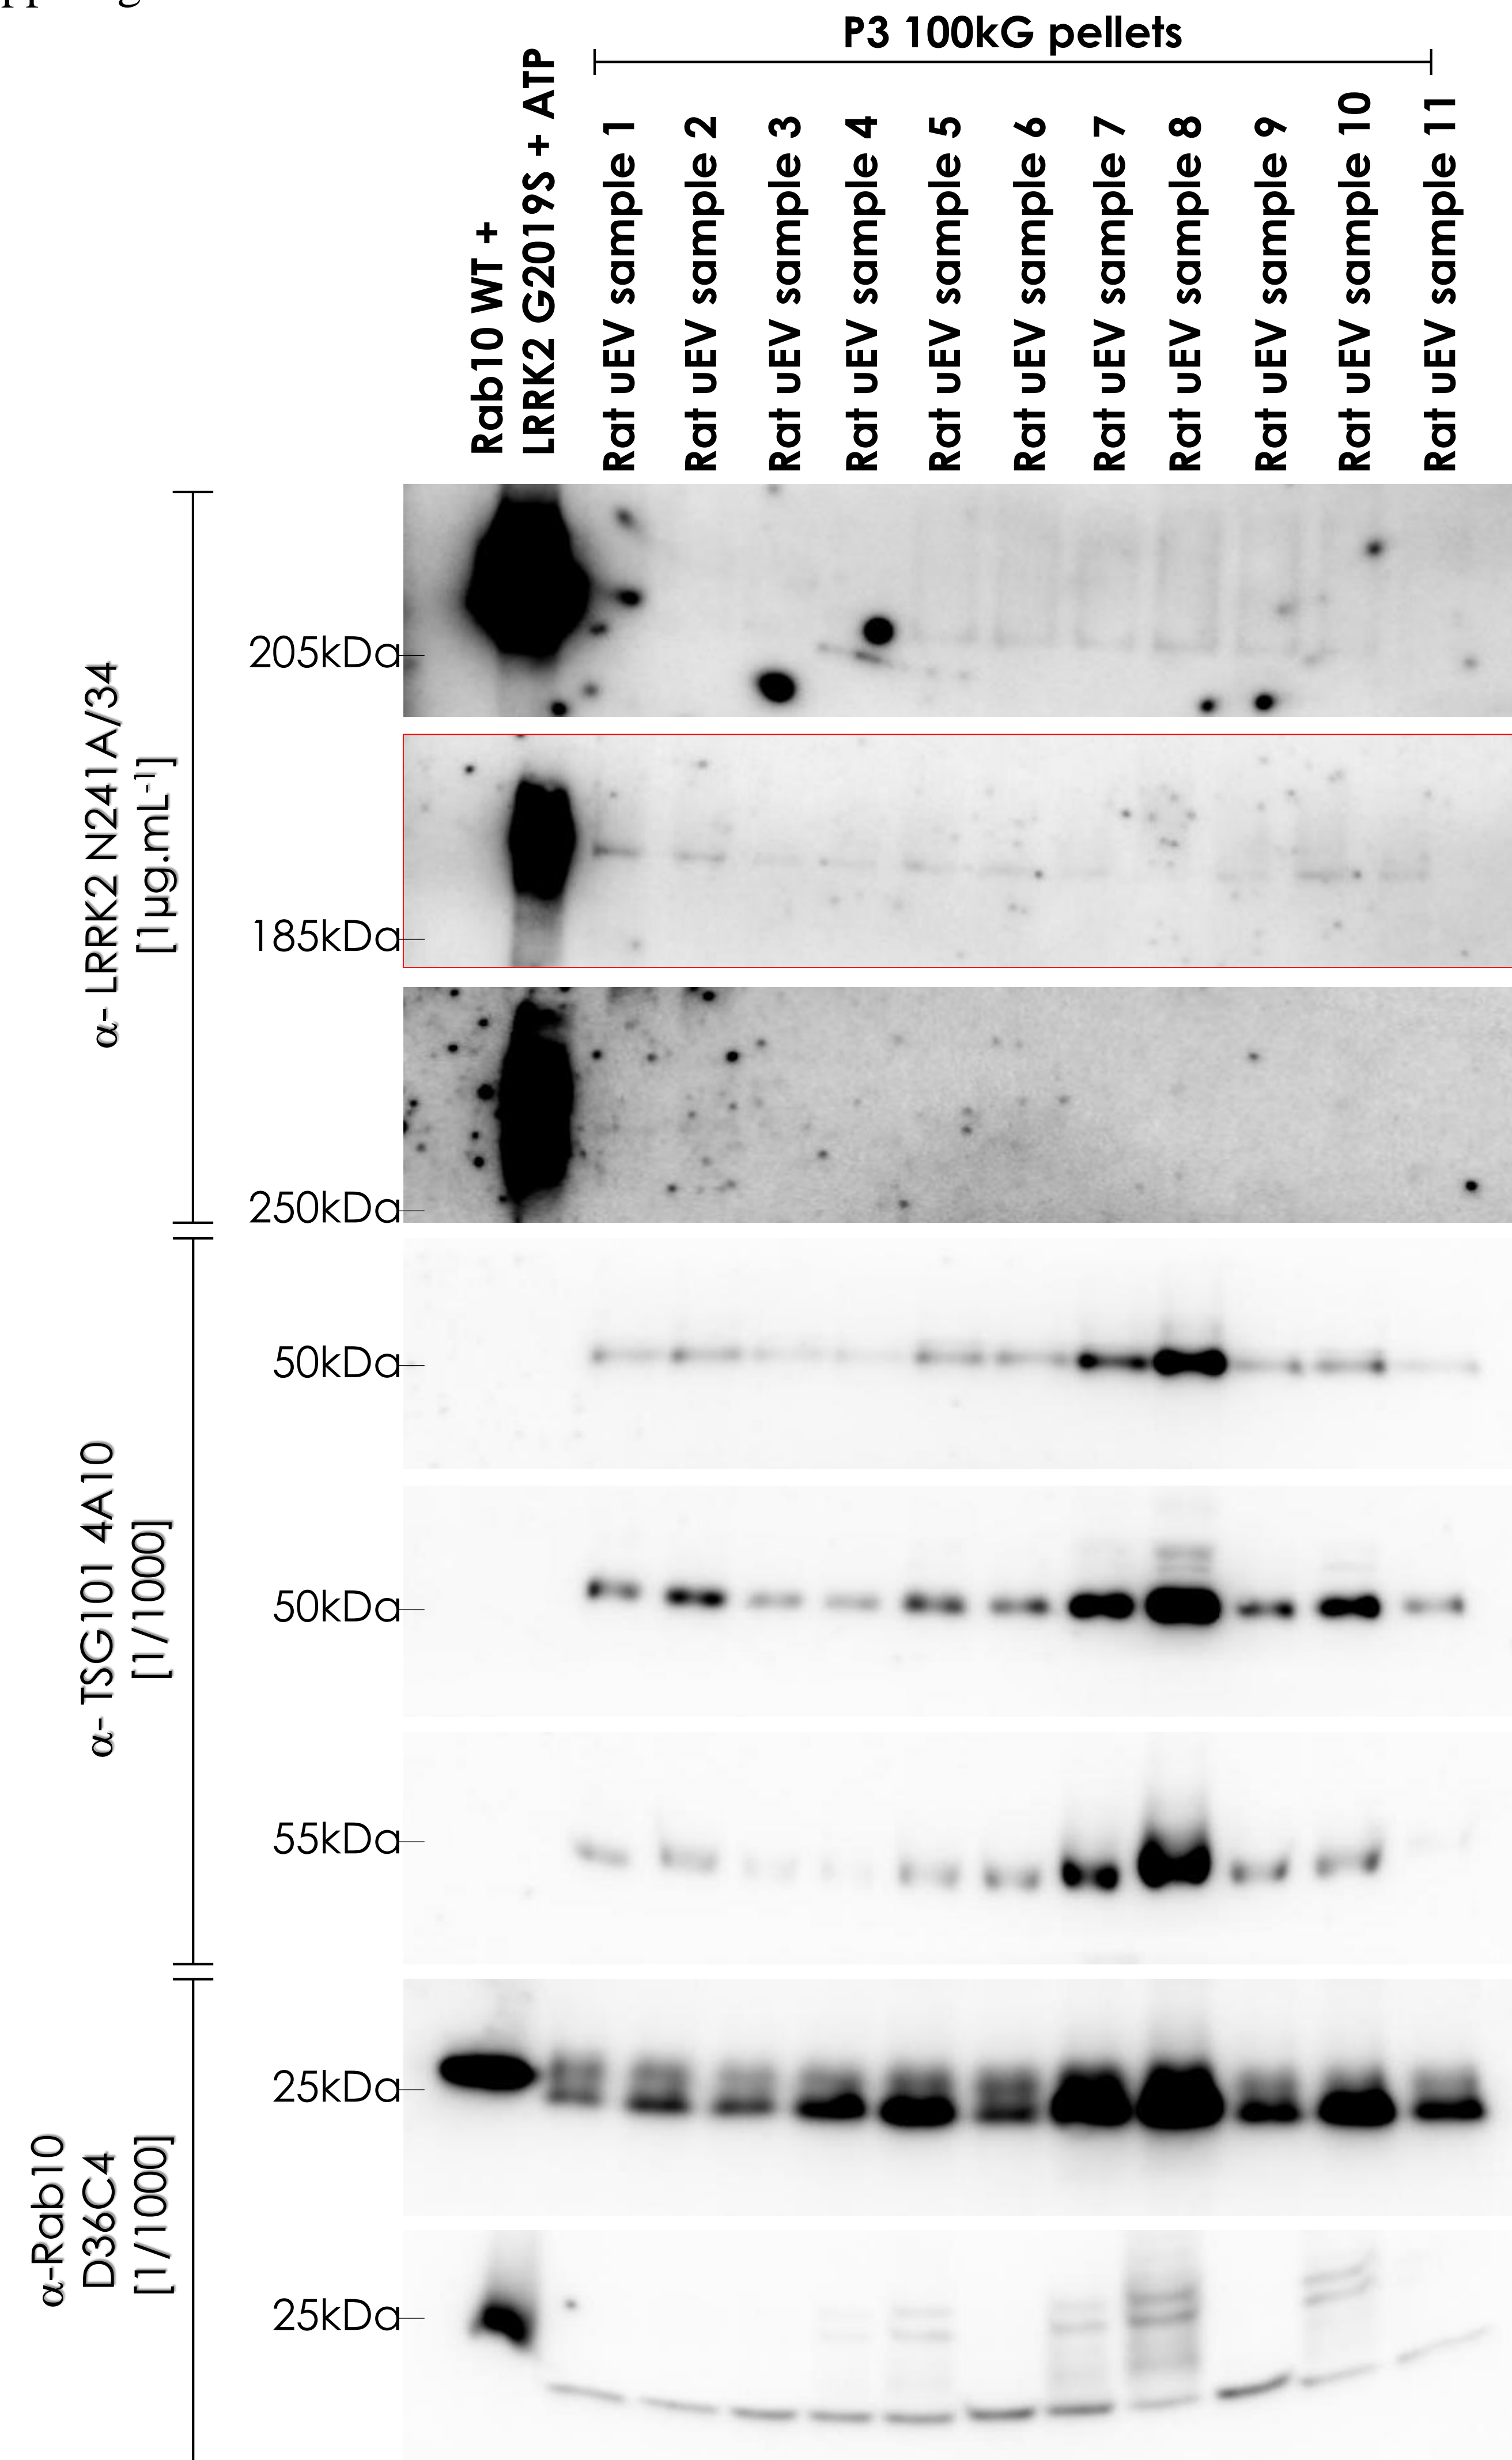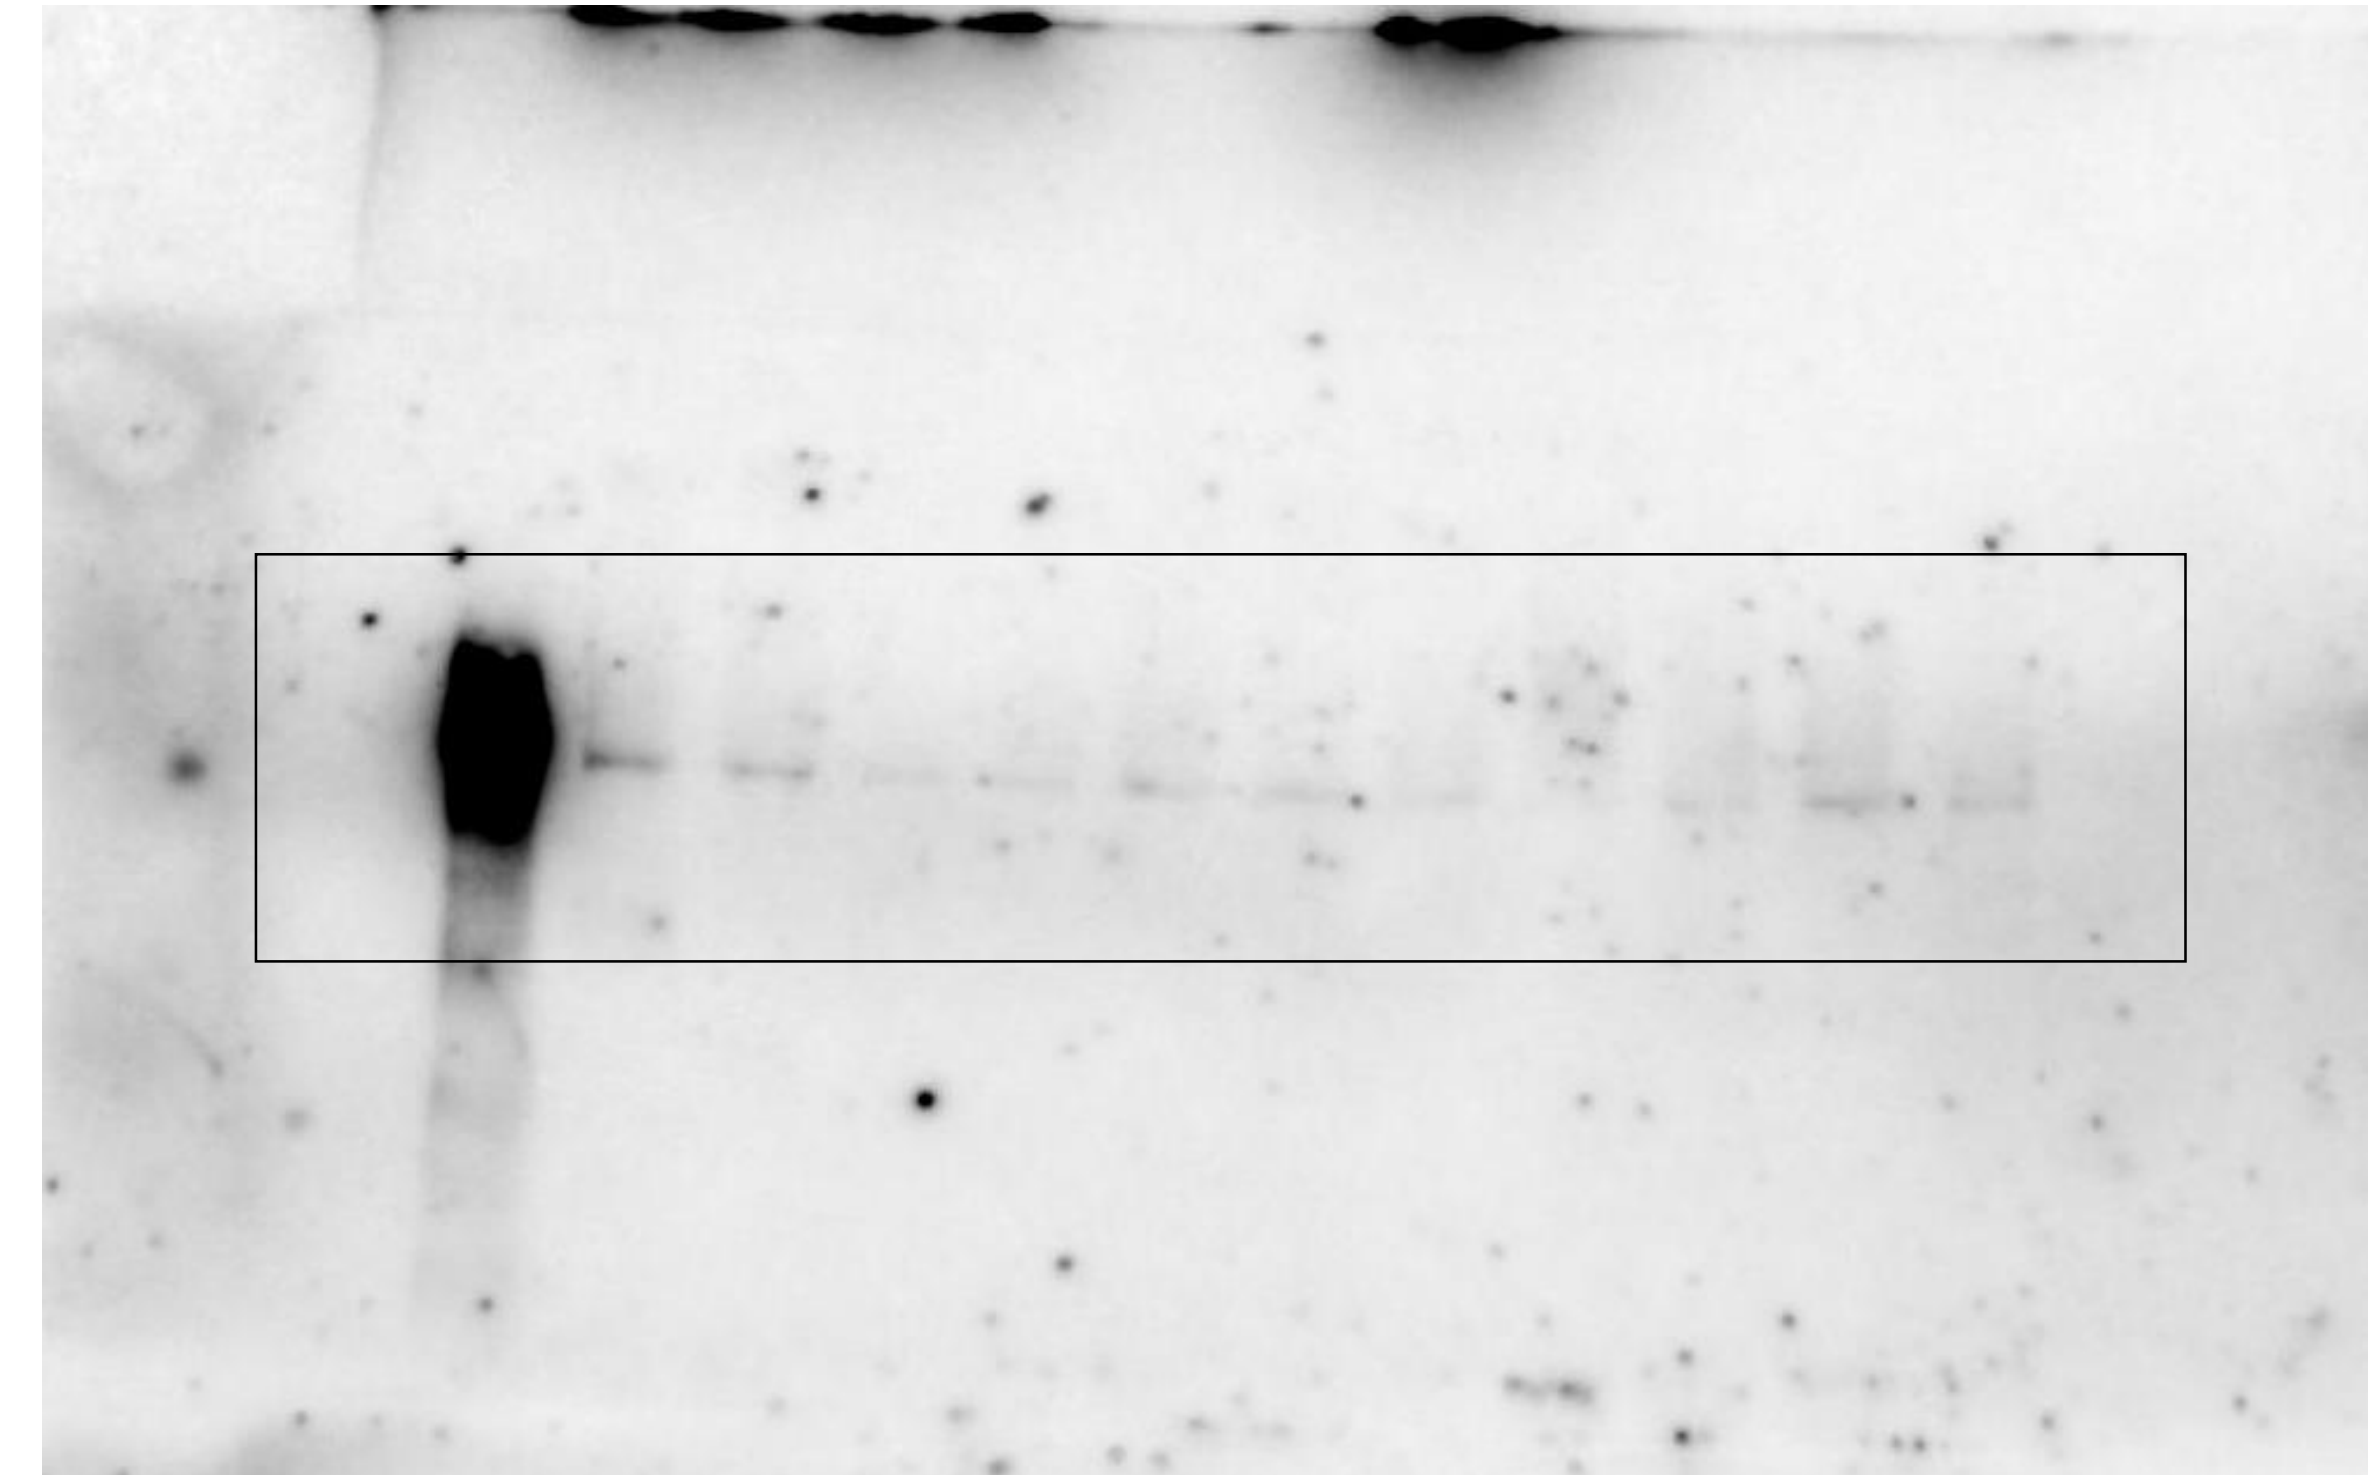

Suppl Figure 13a

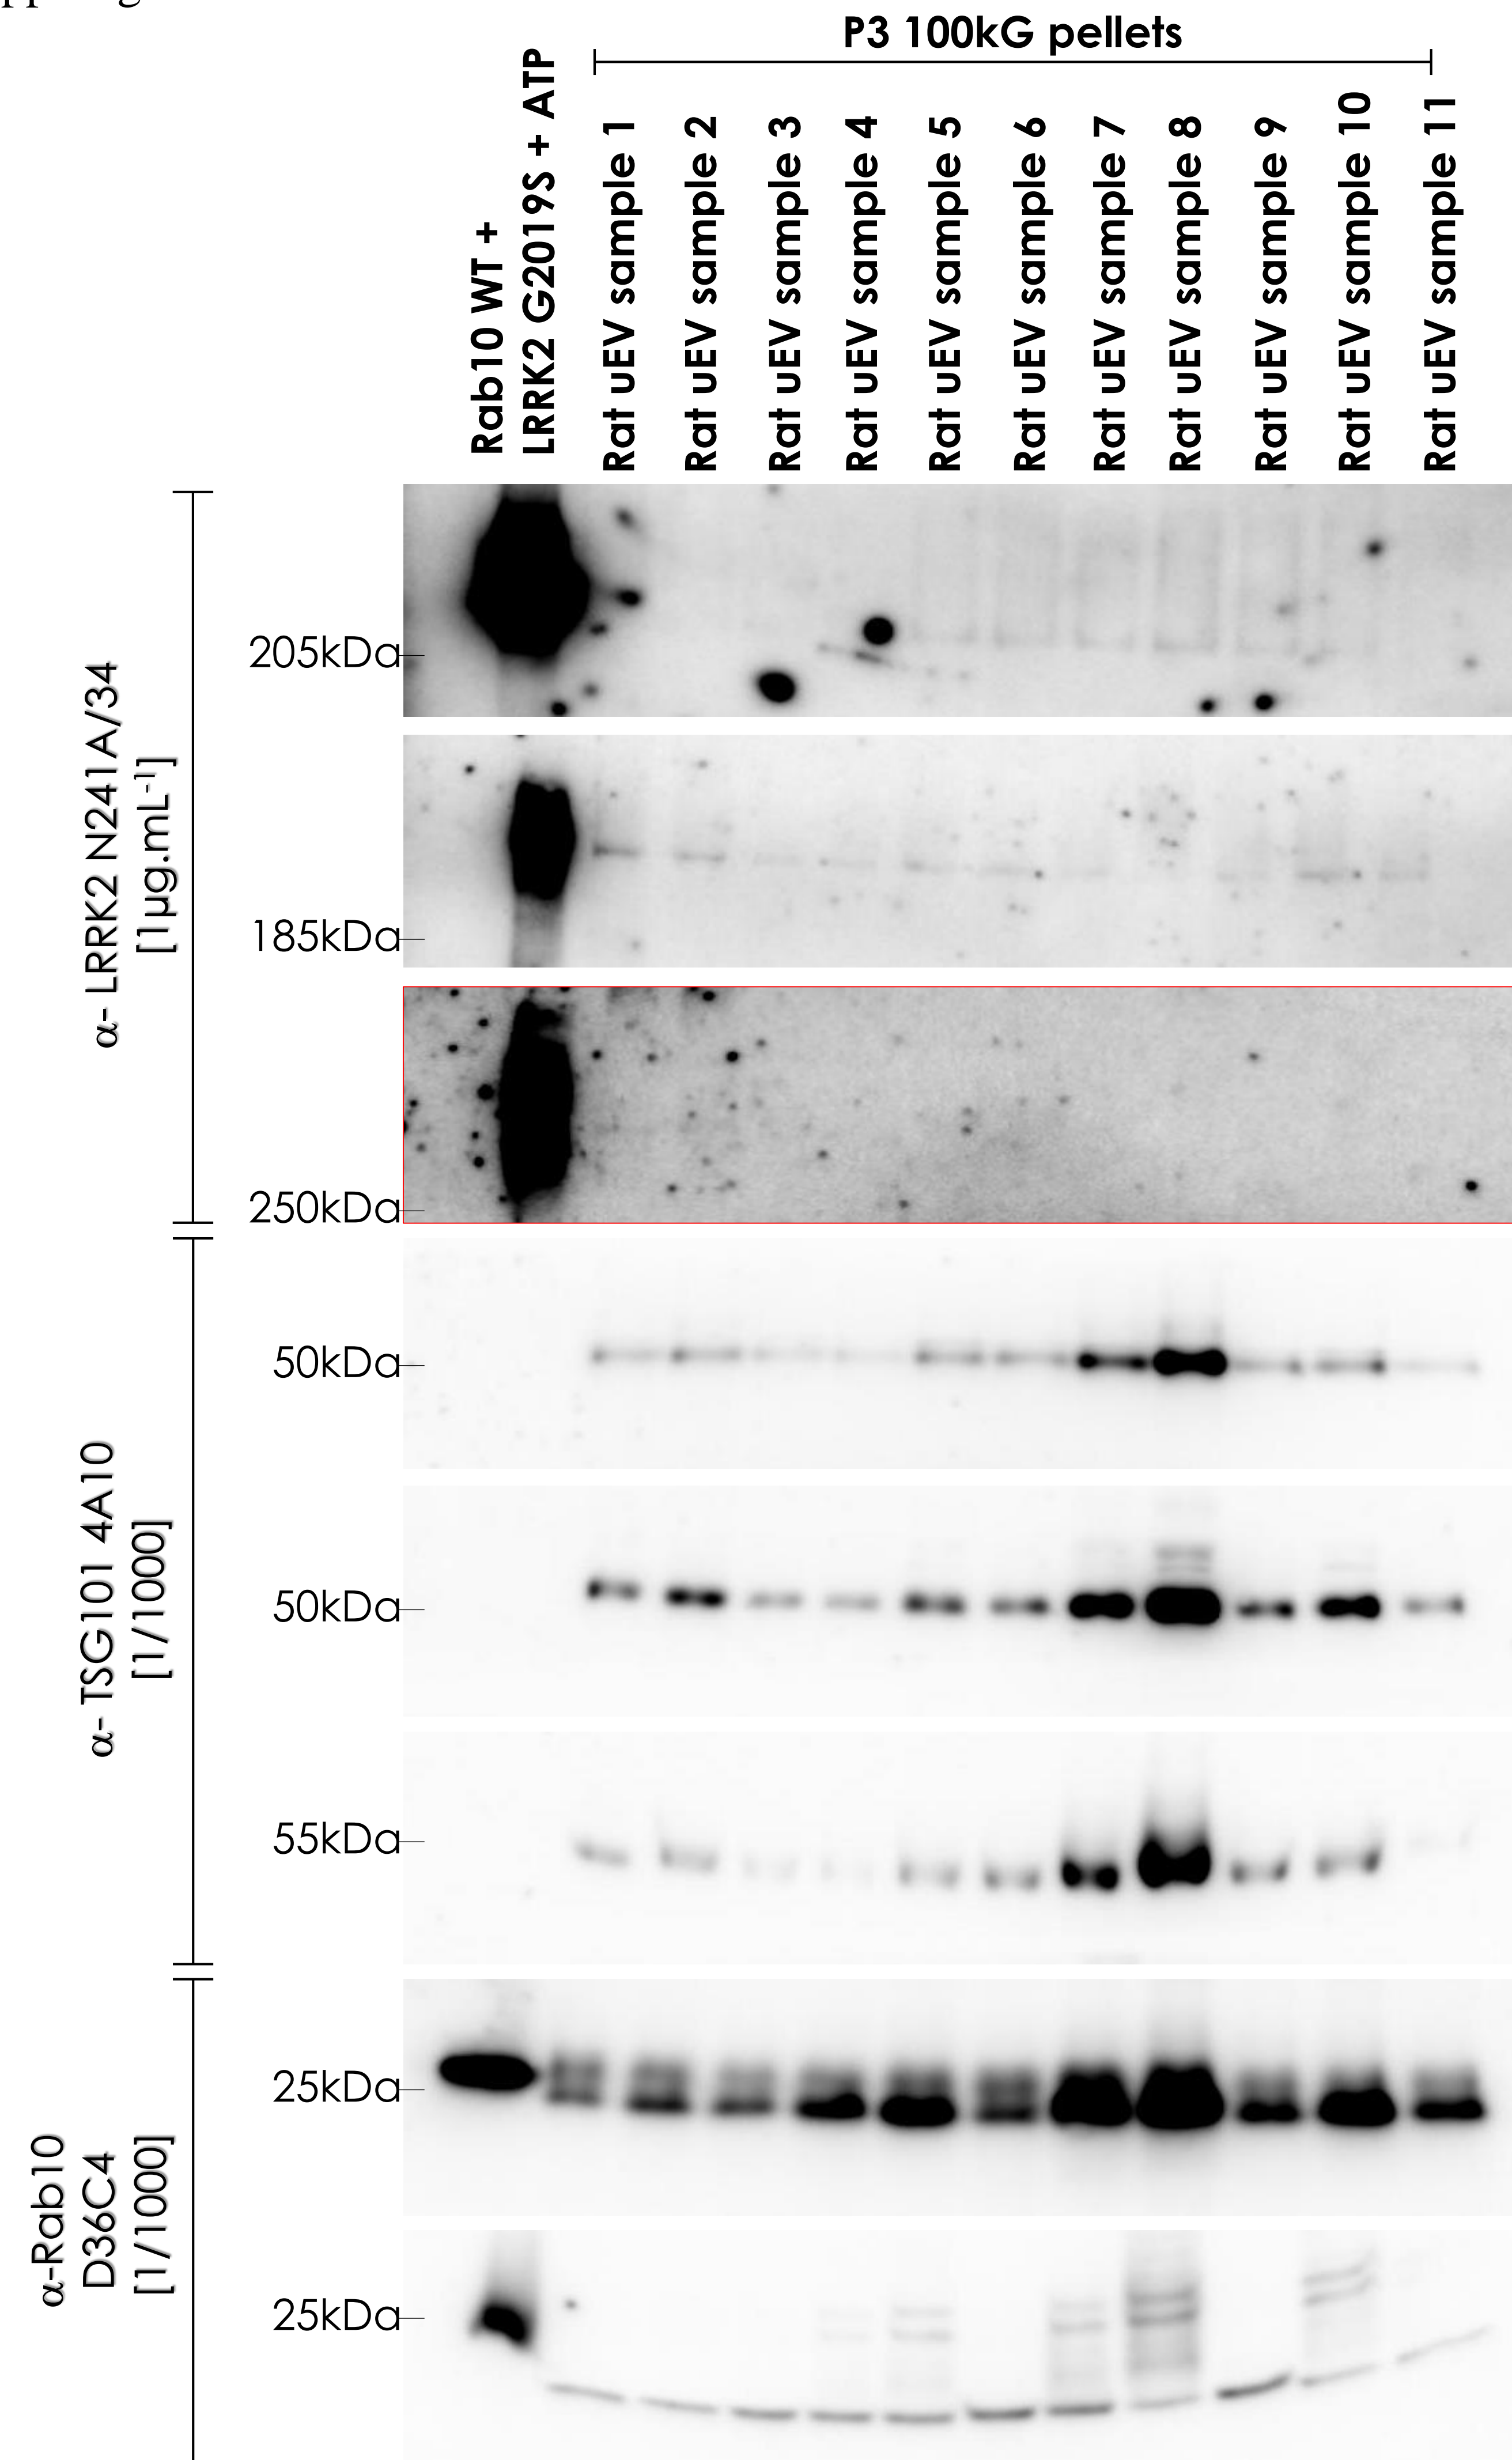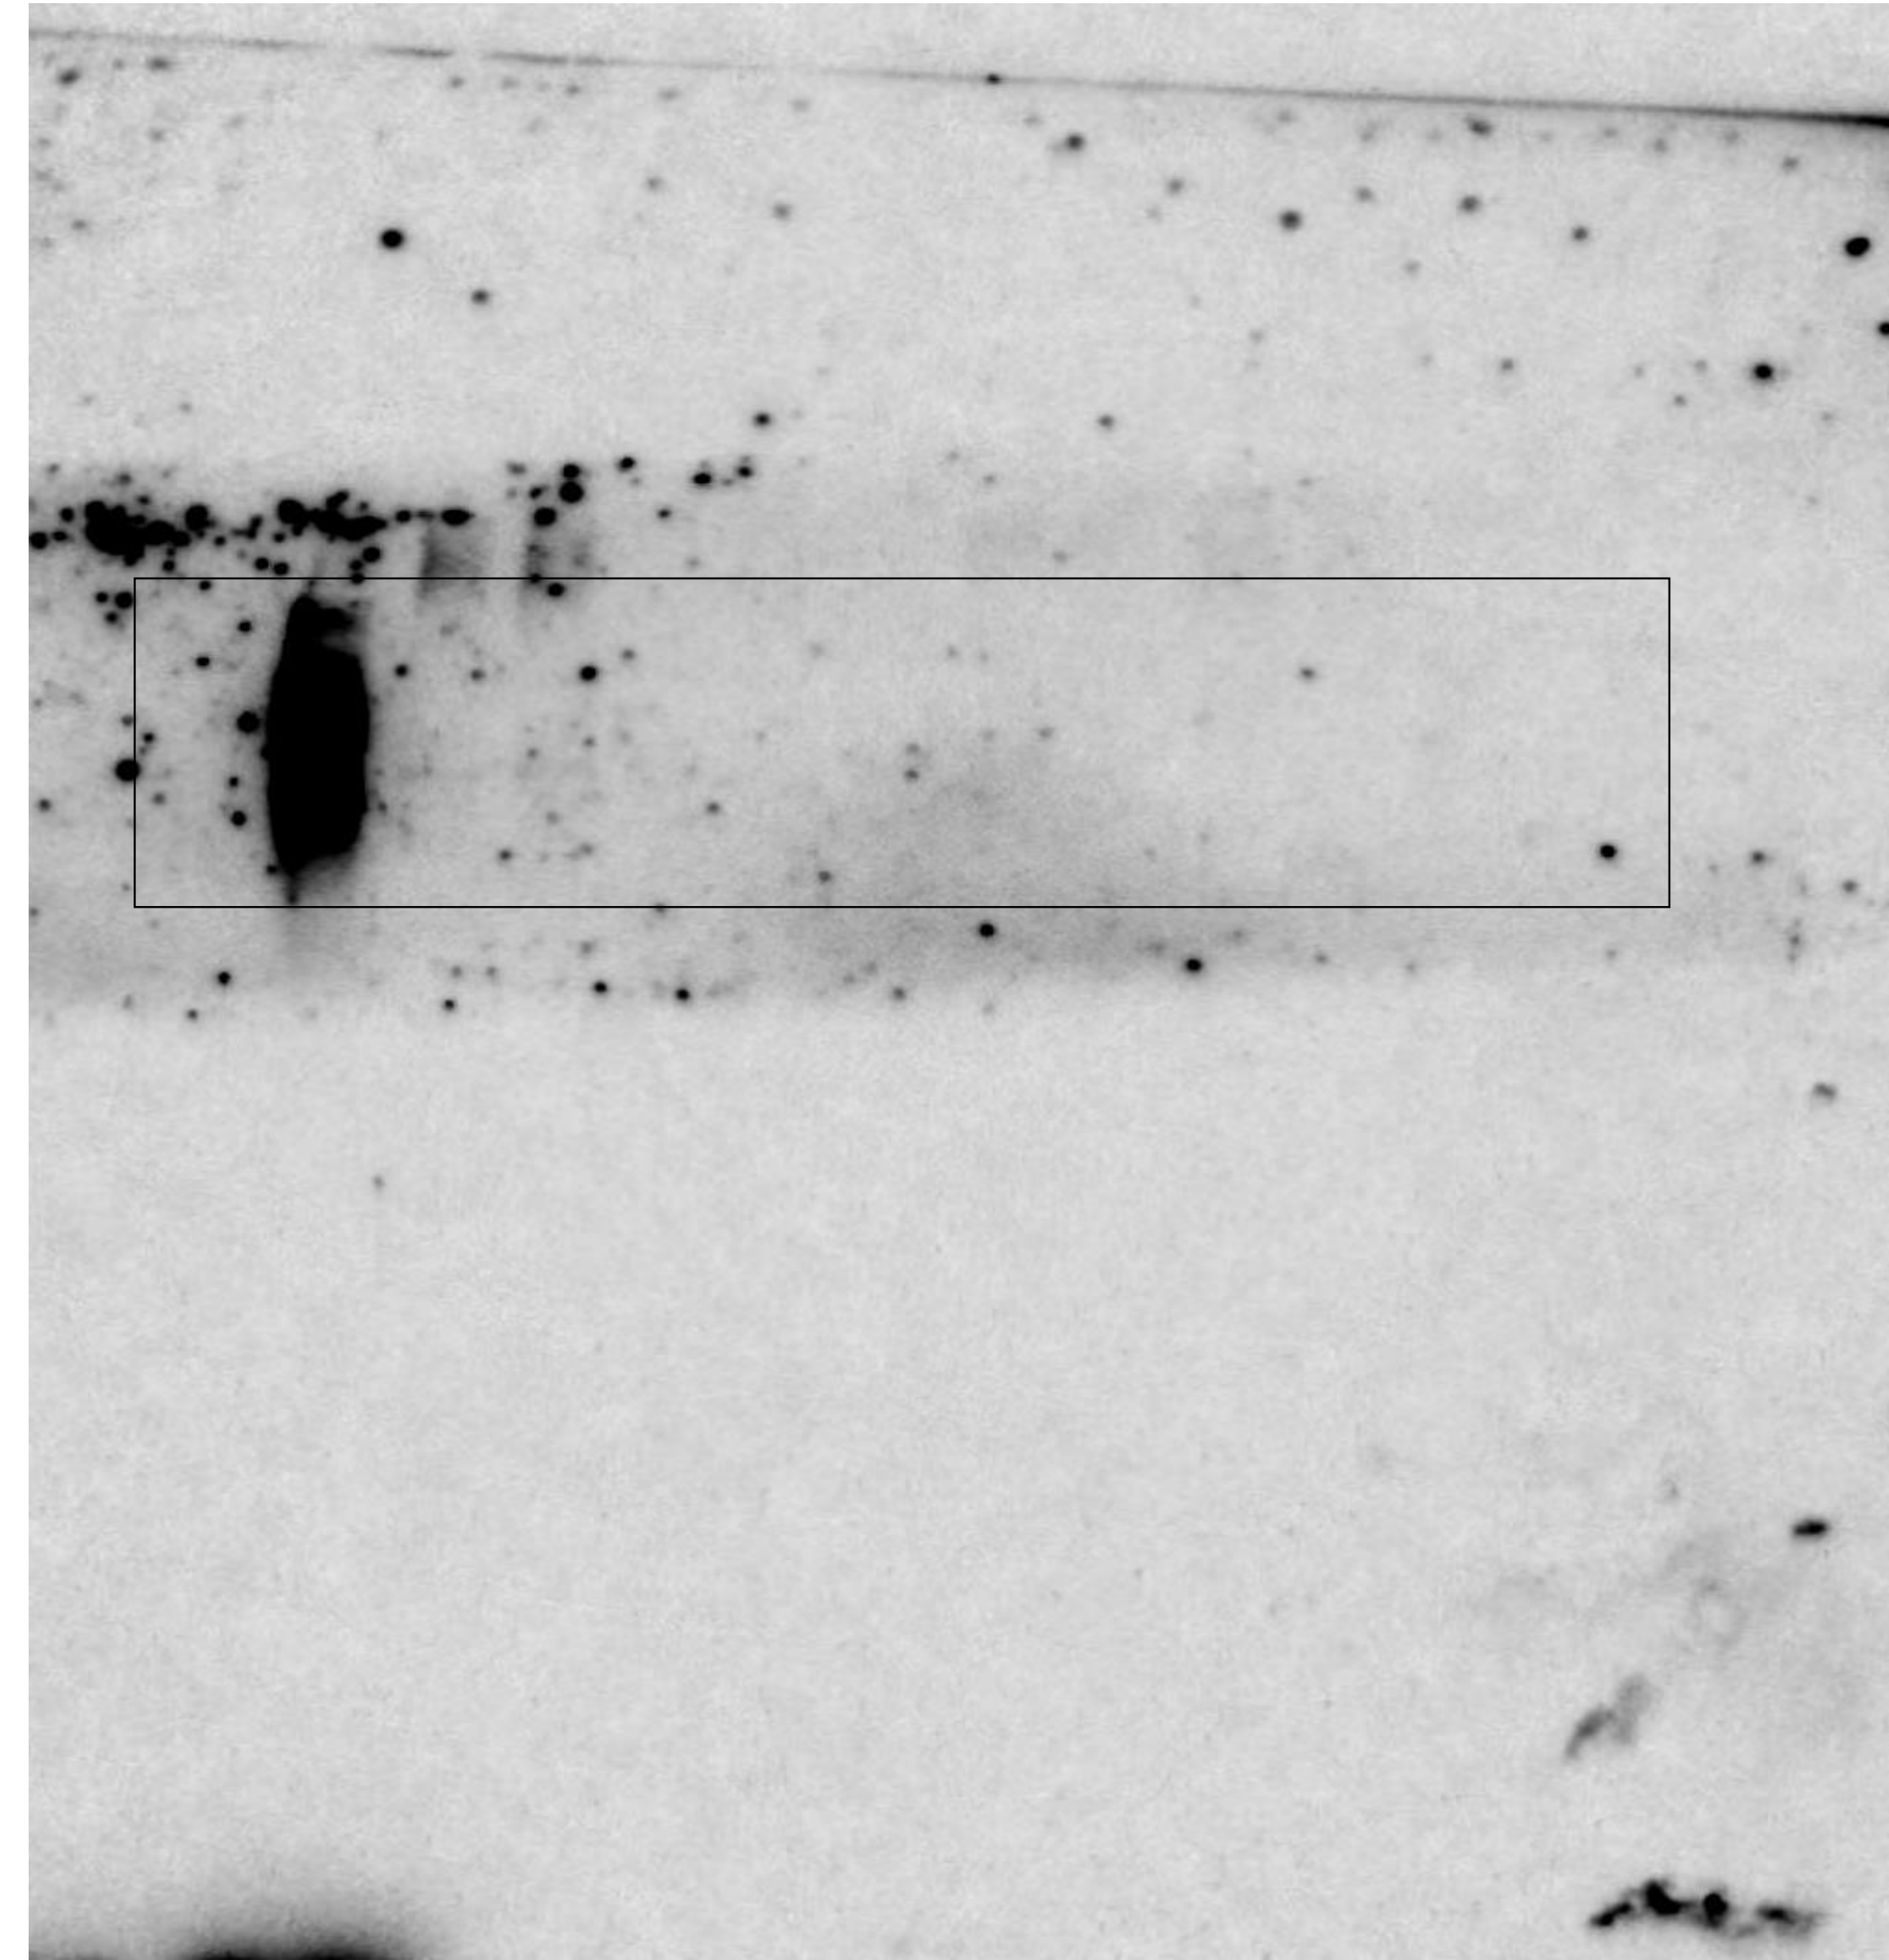

Suppl Figure 13a

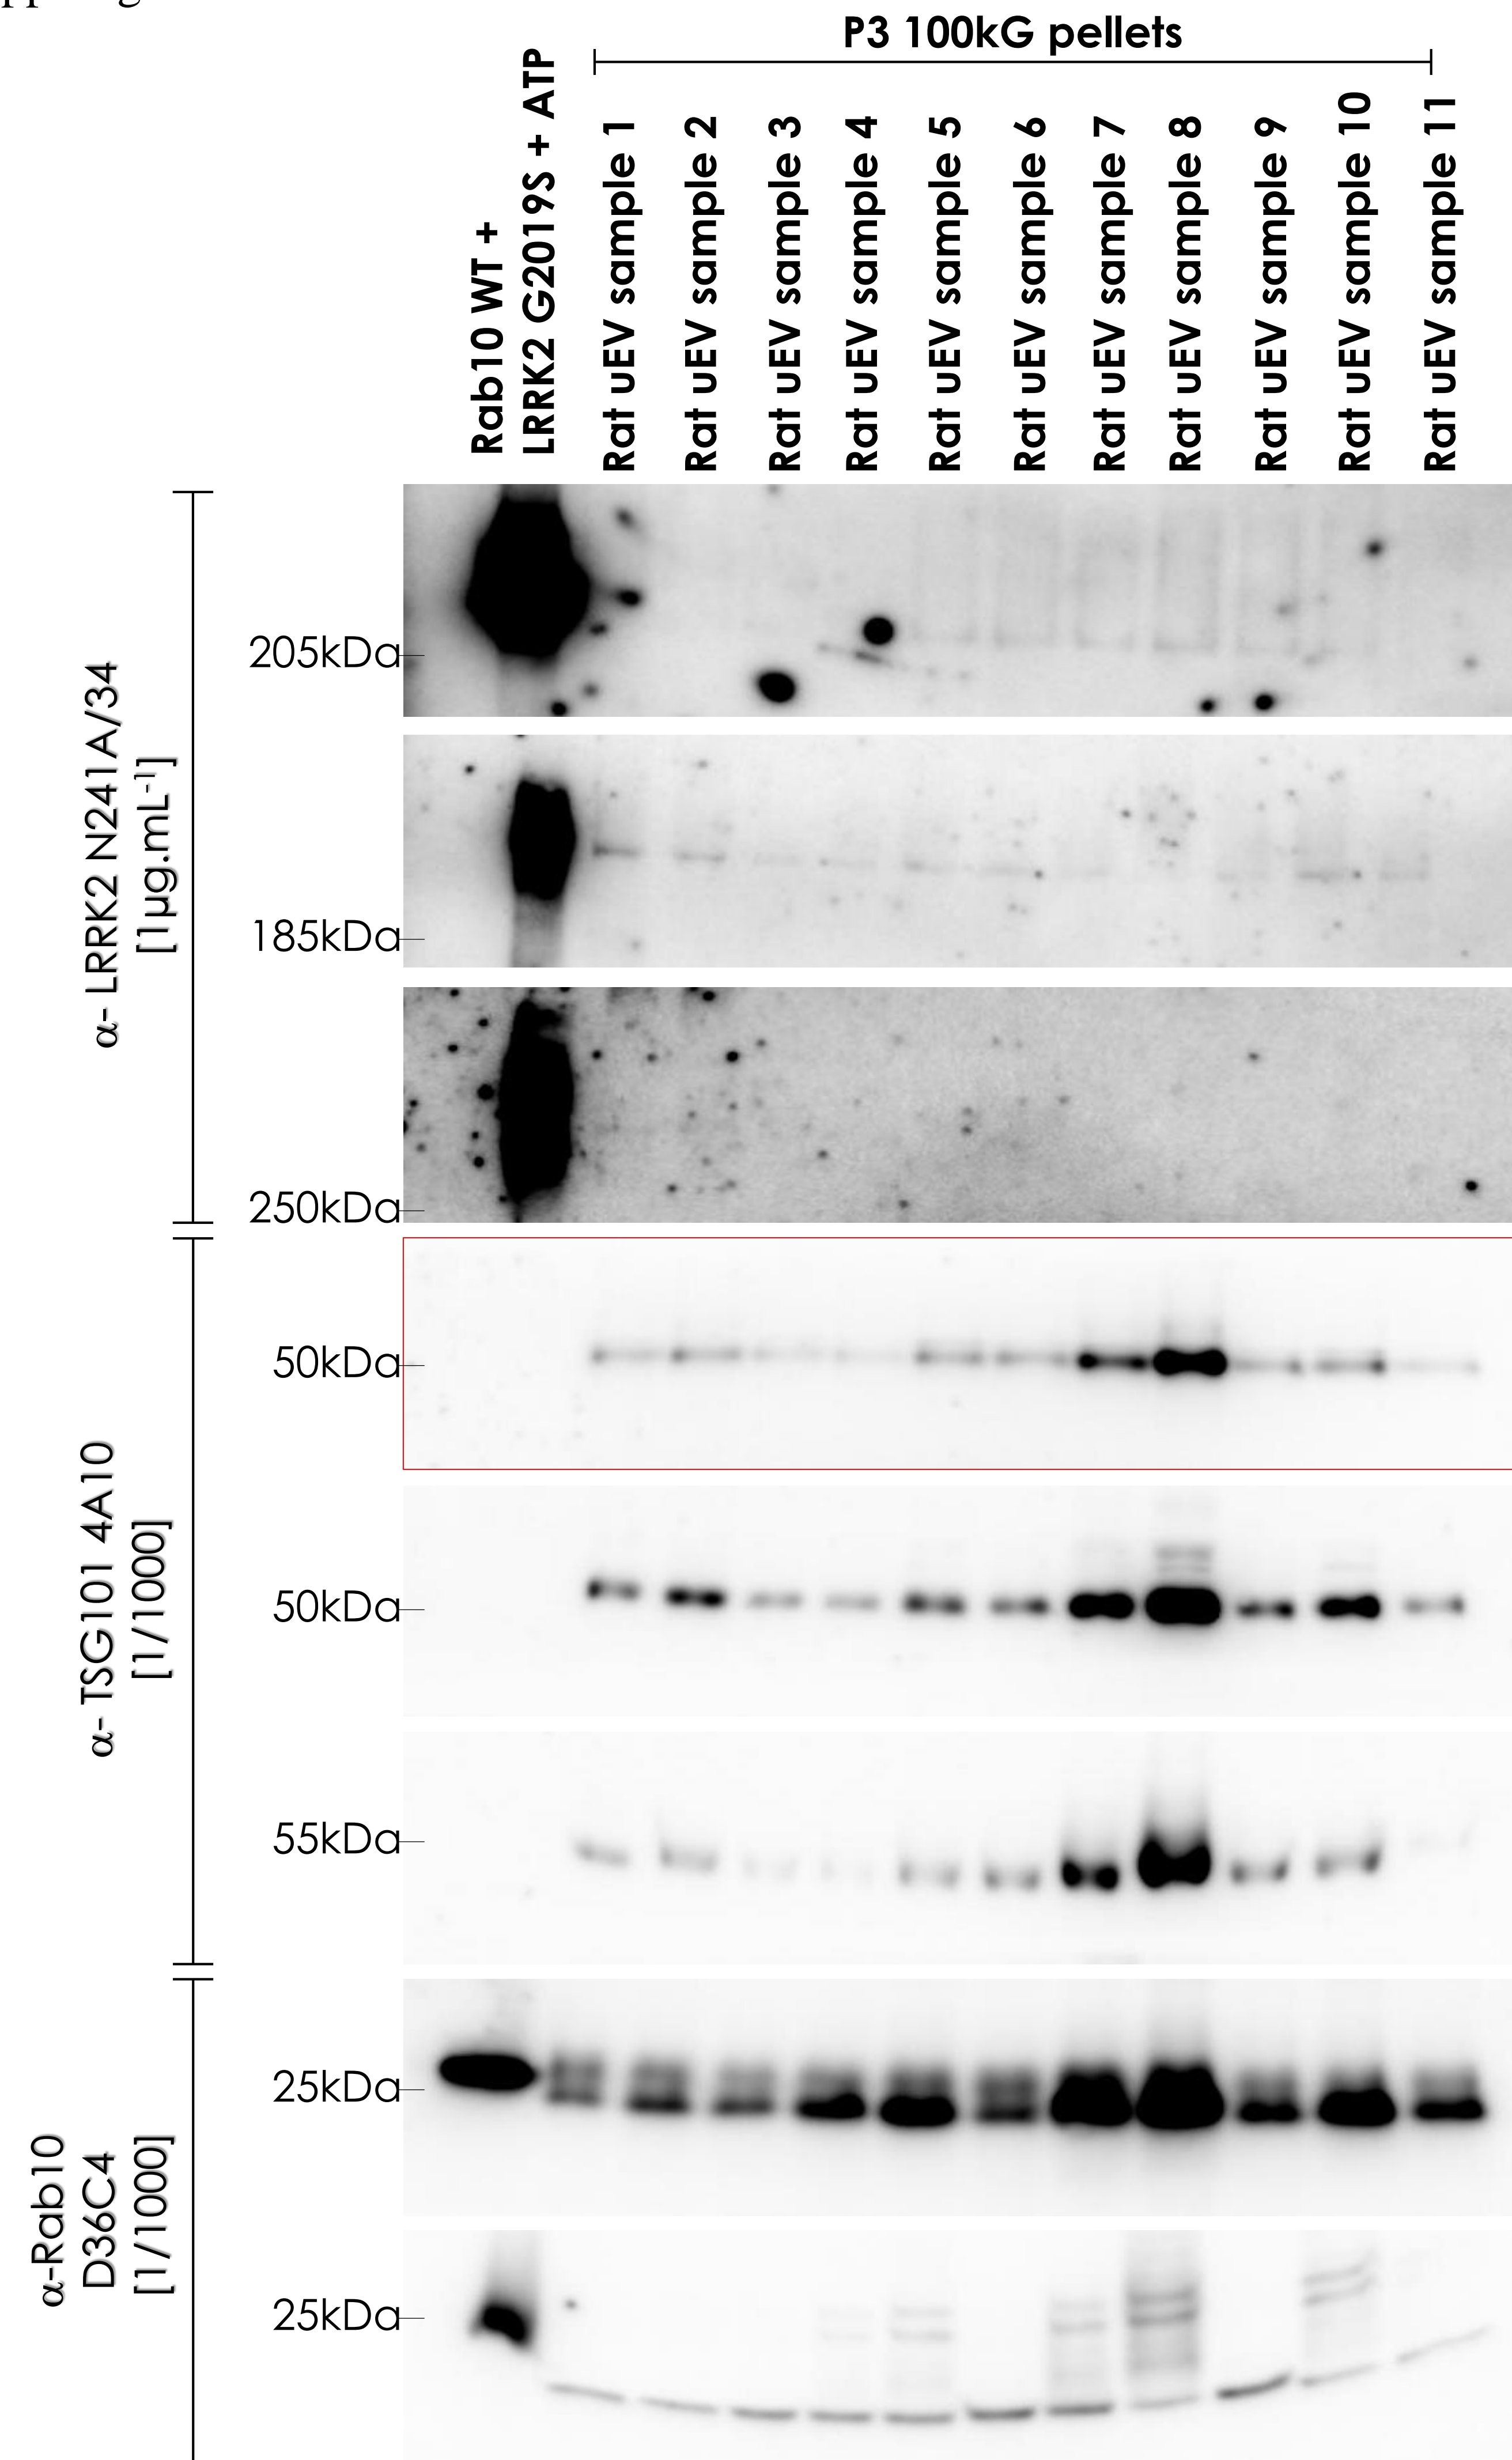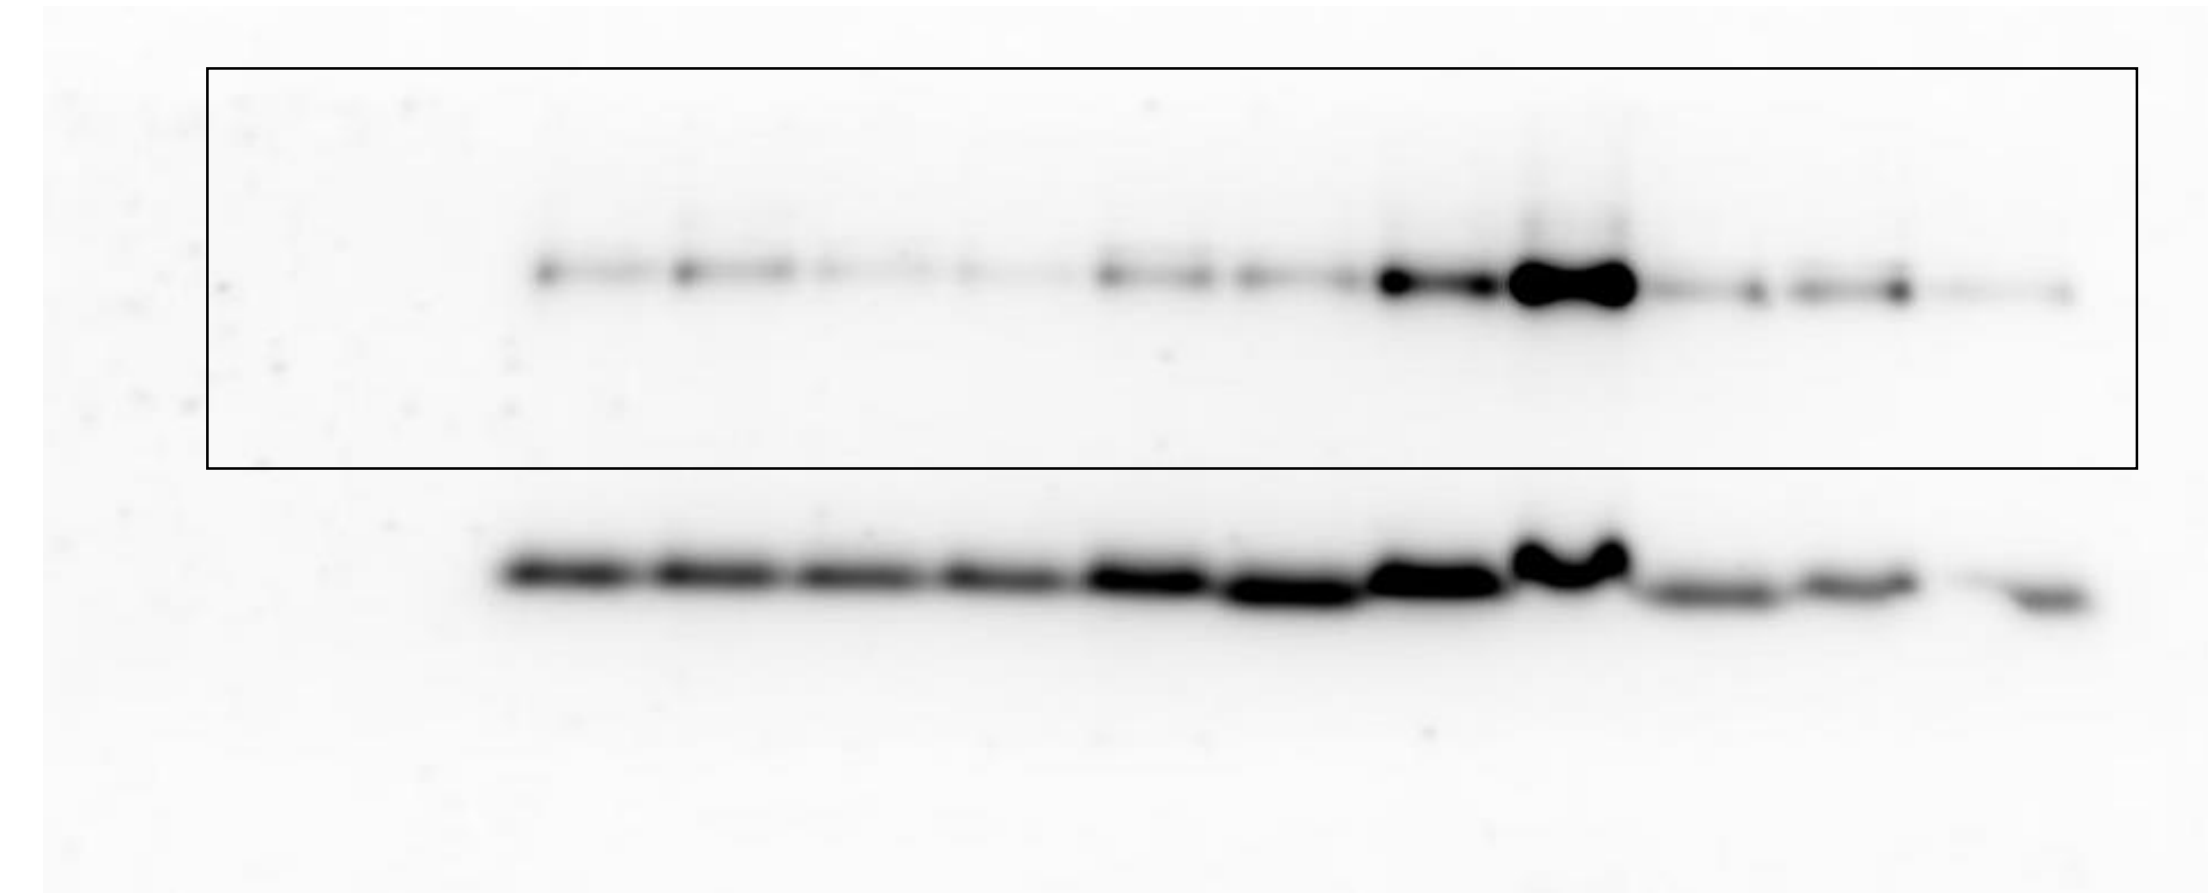

Suppl Figure 13a

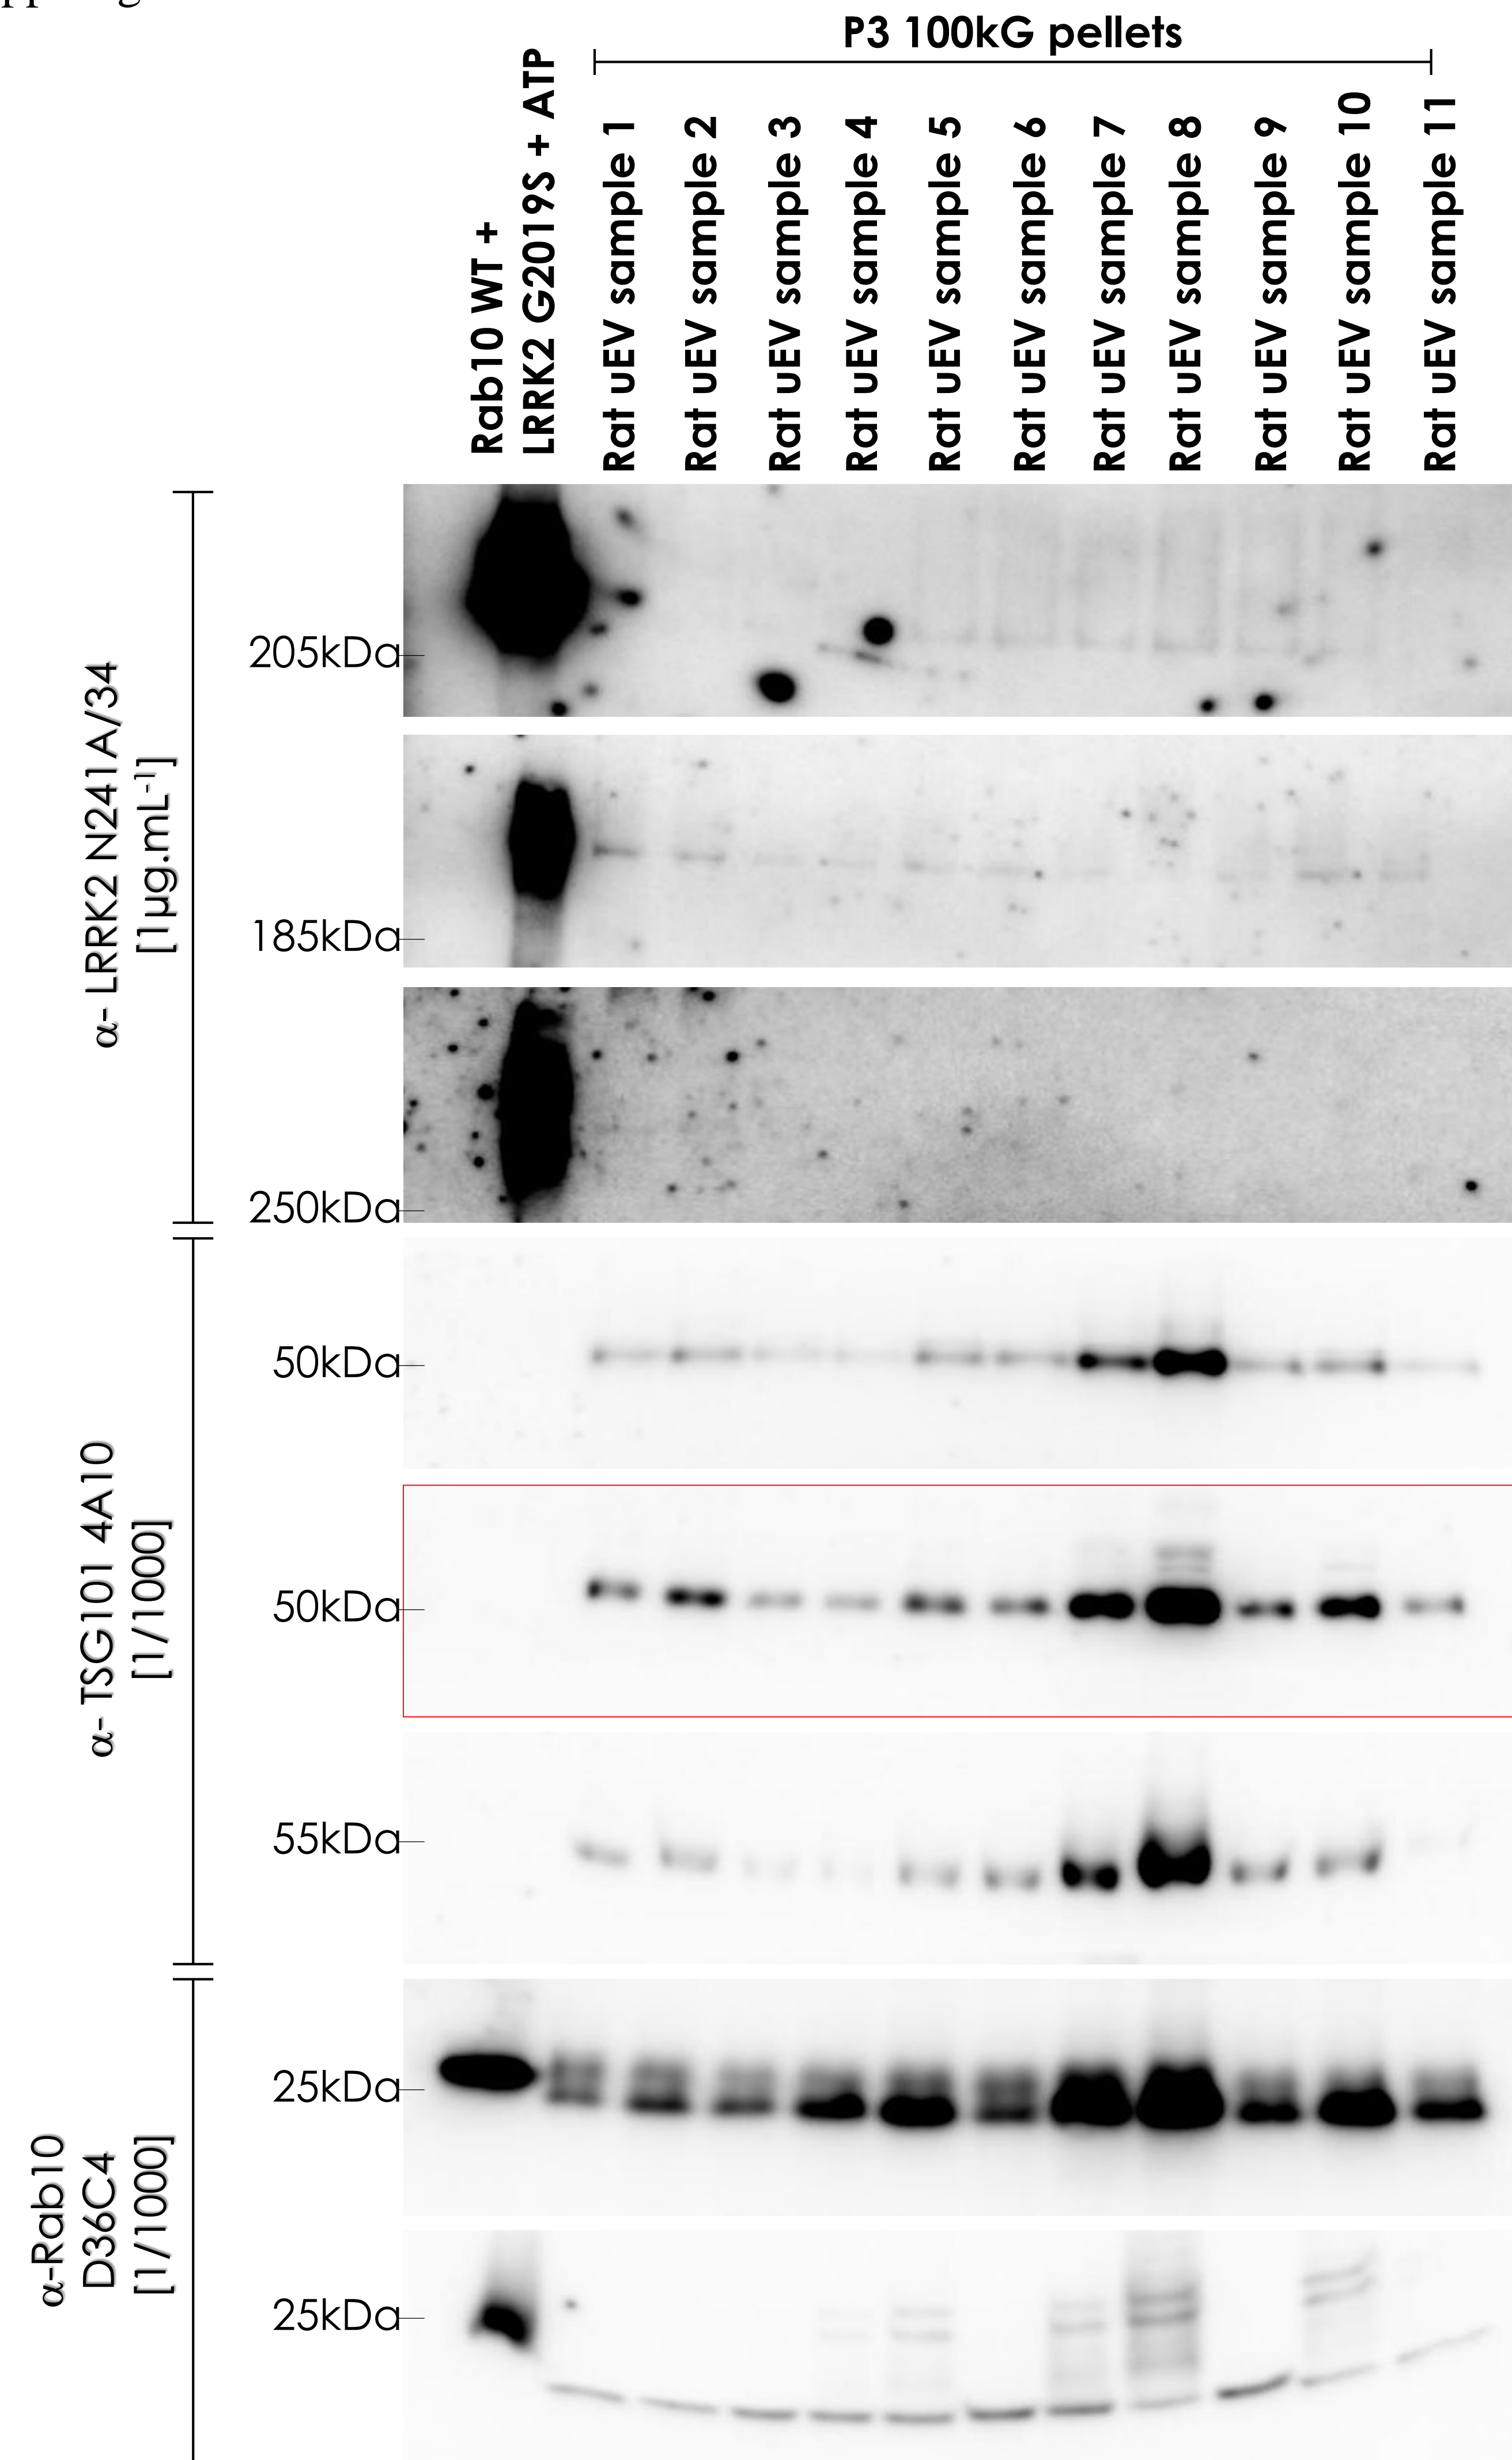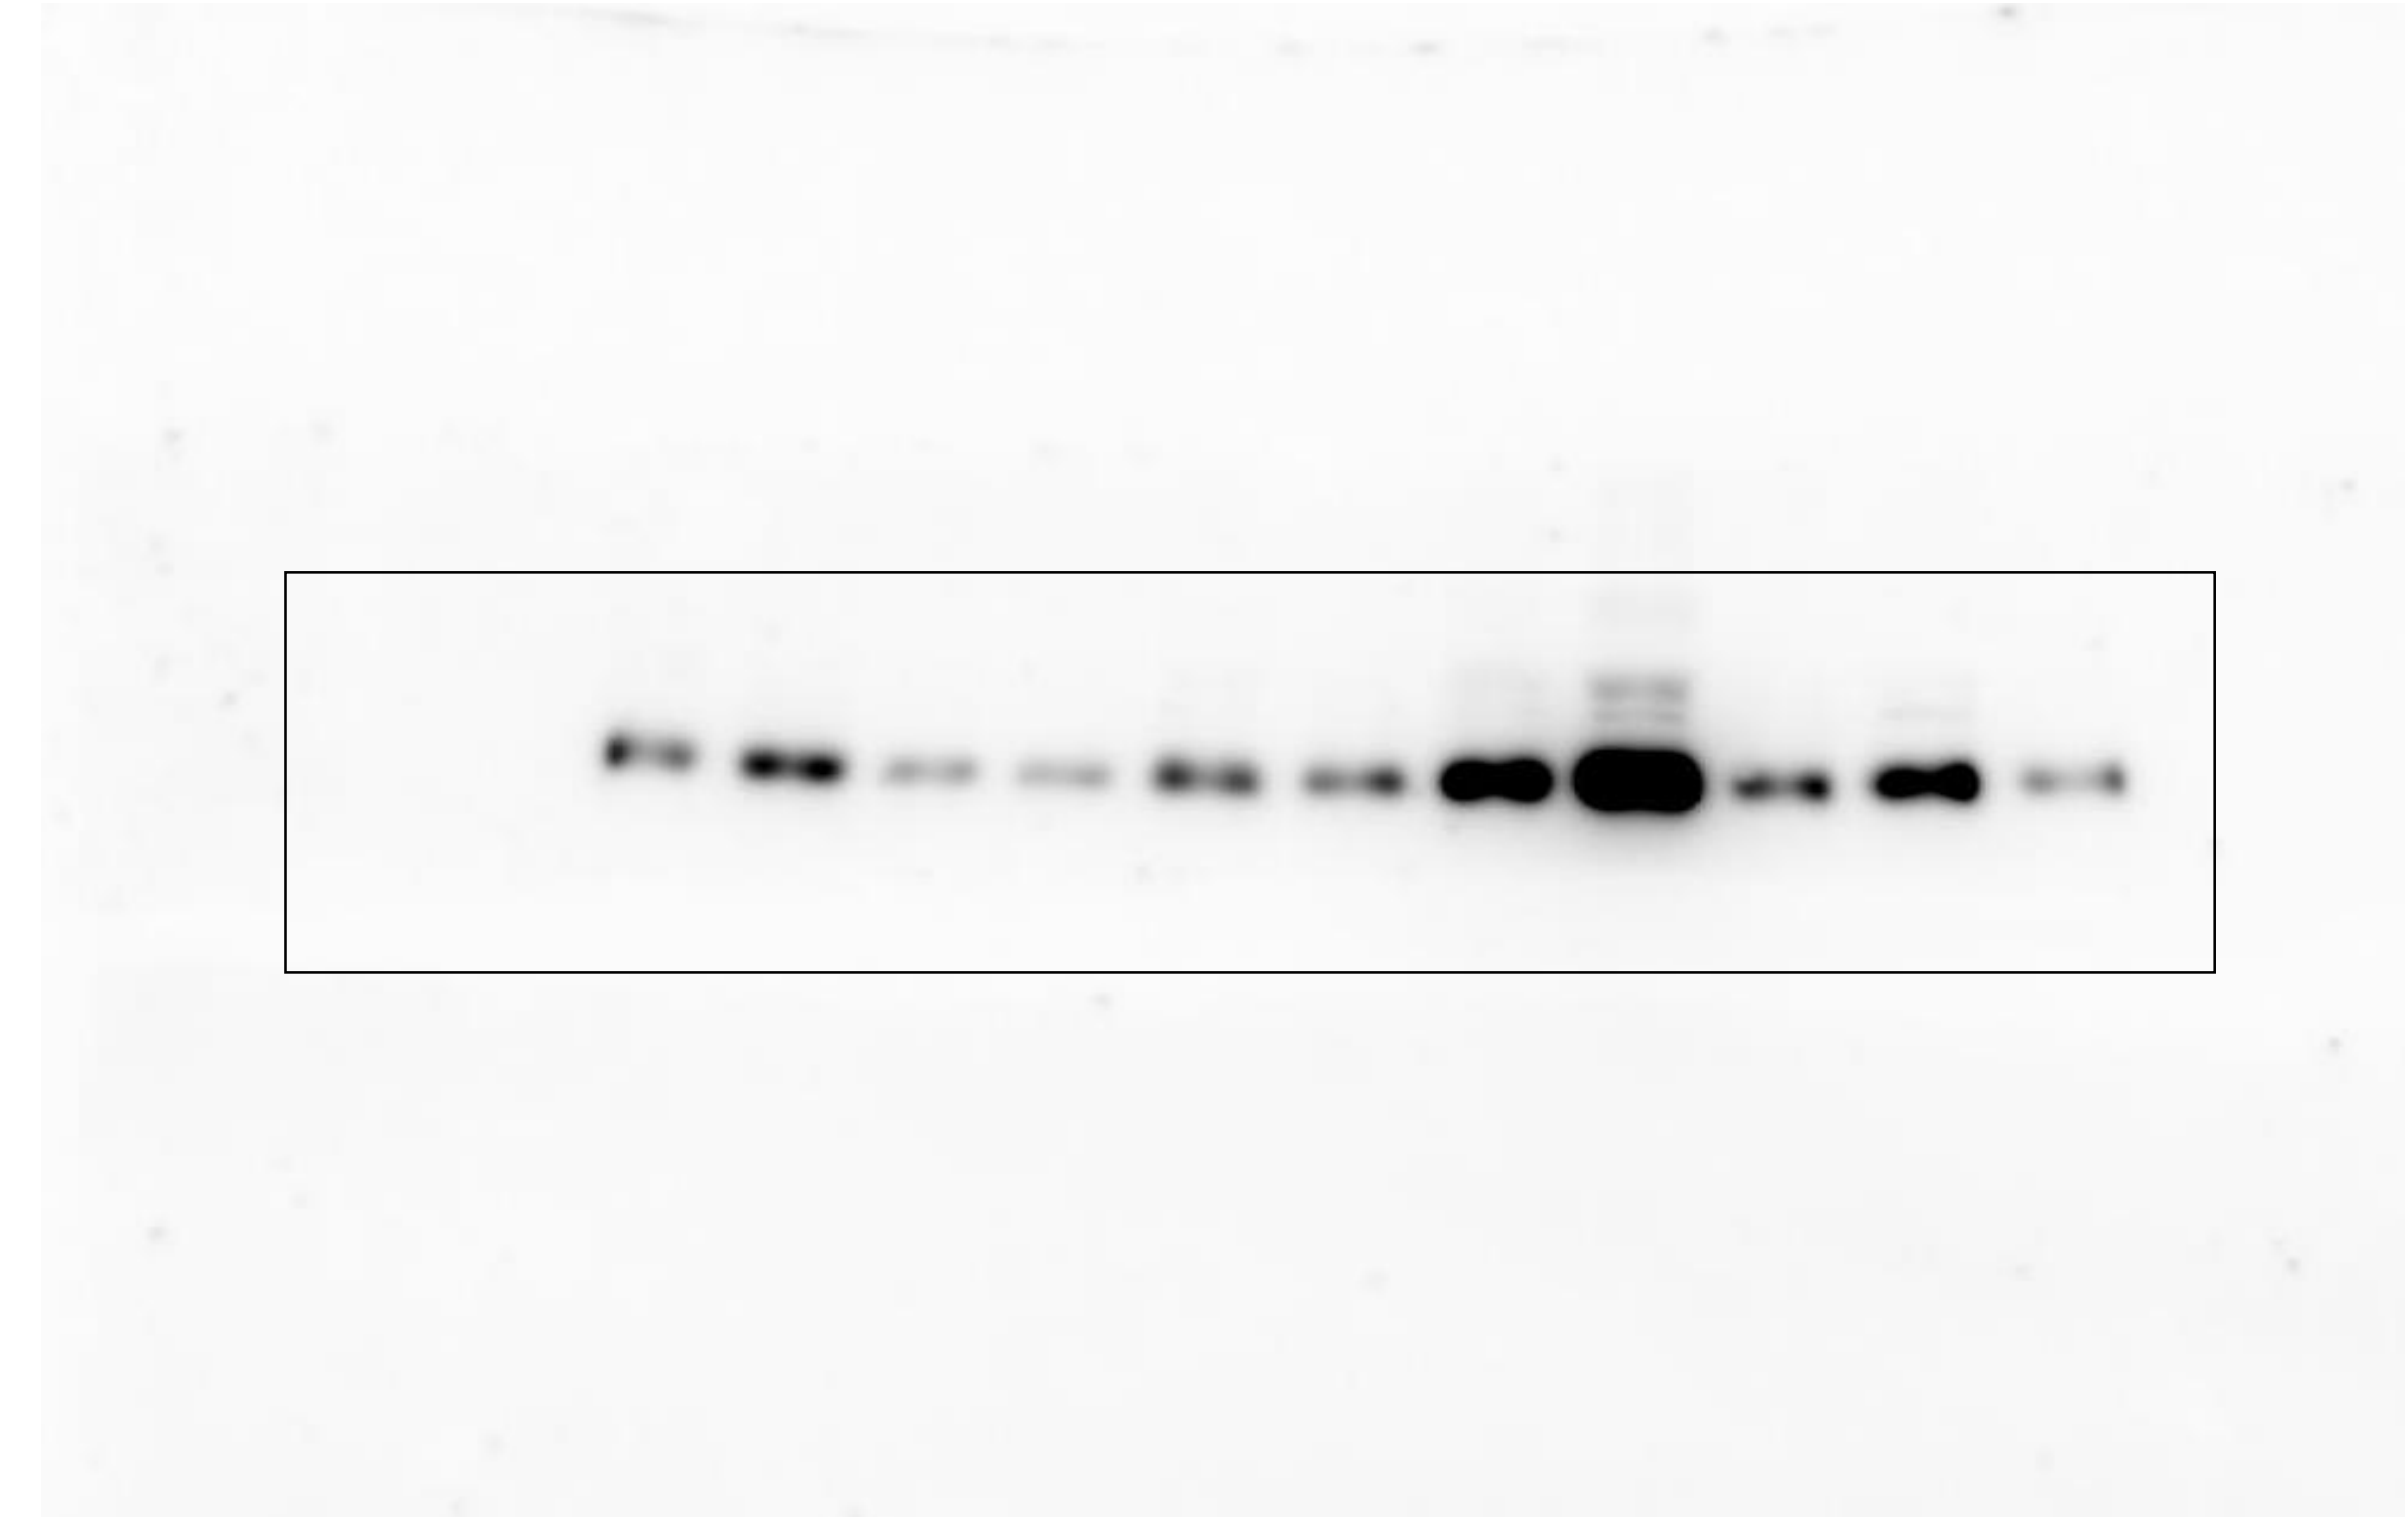



Suppl Figure 13a

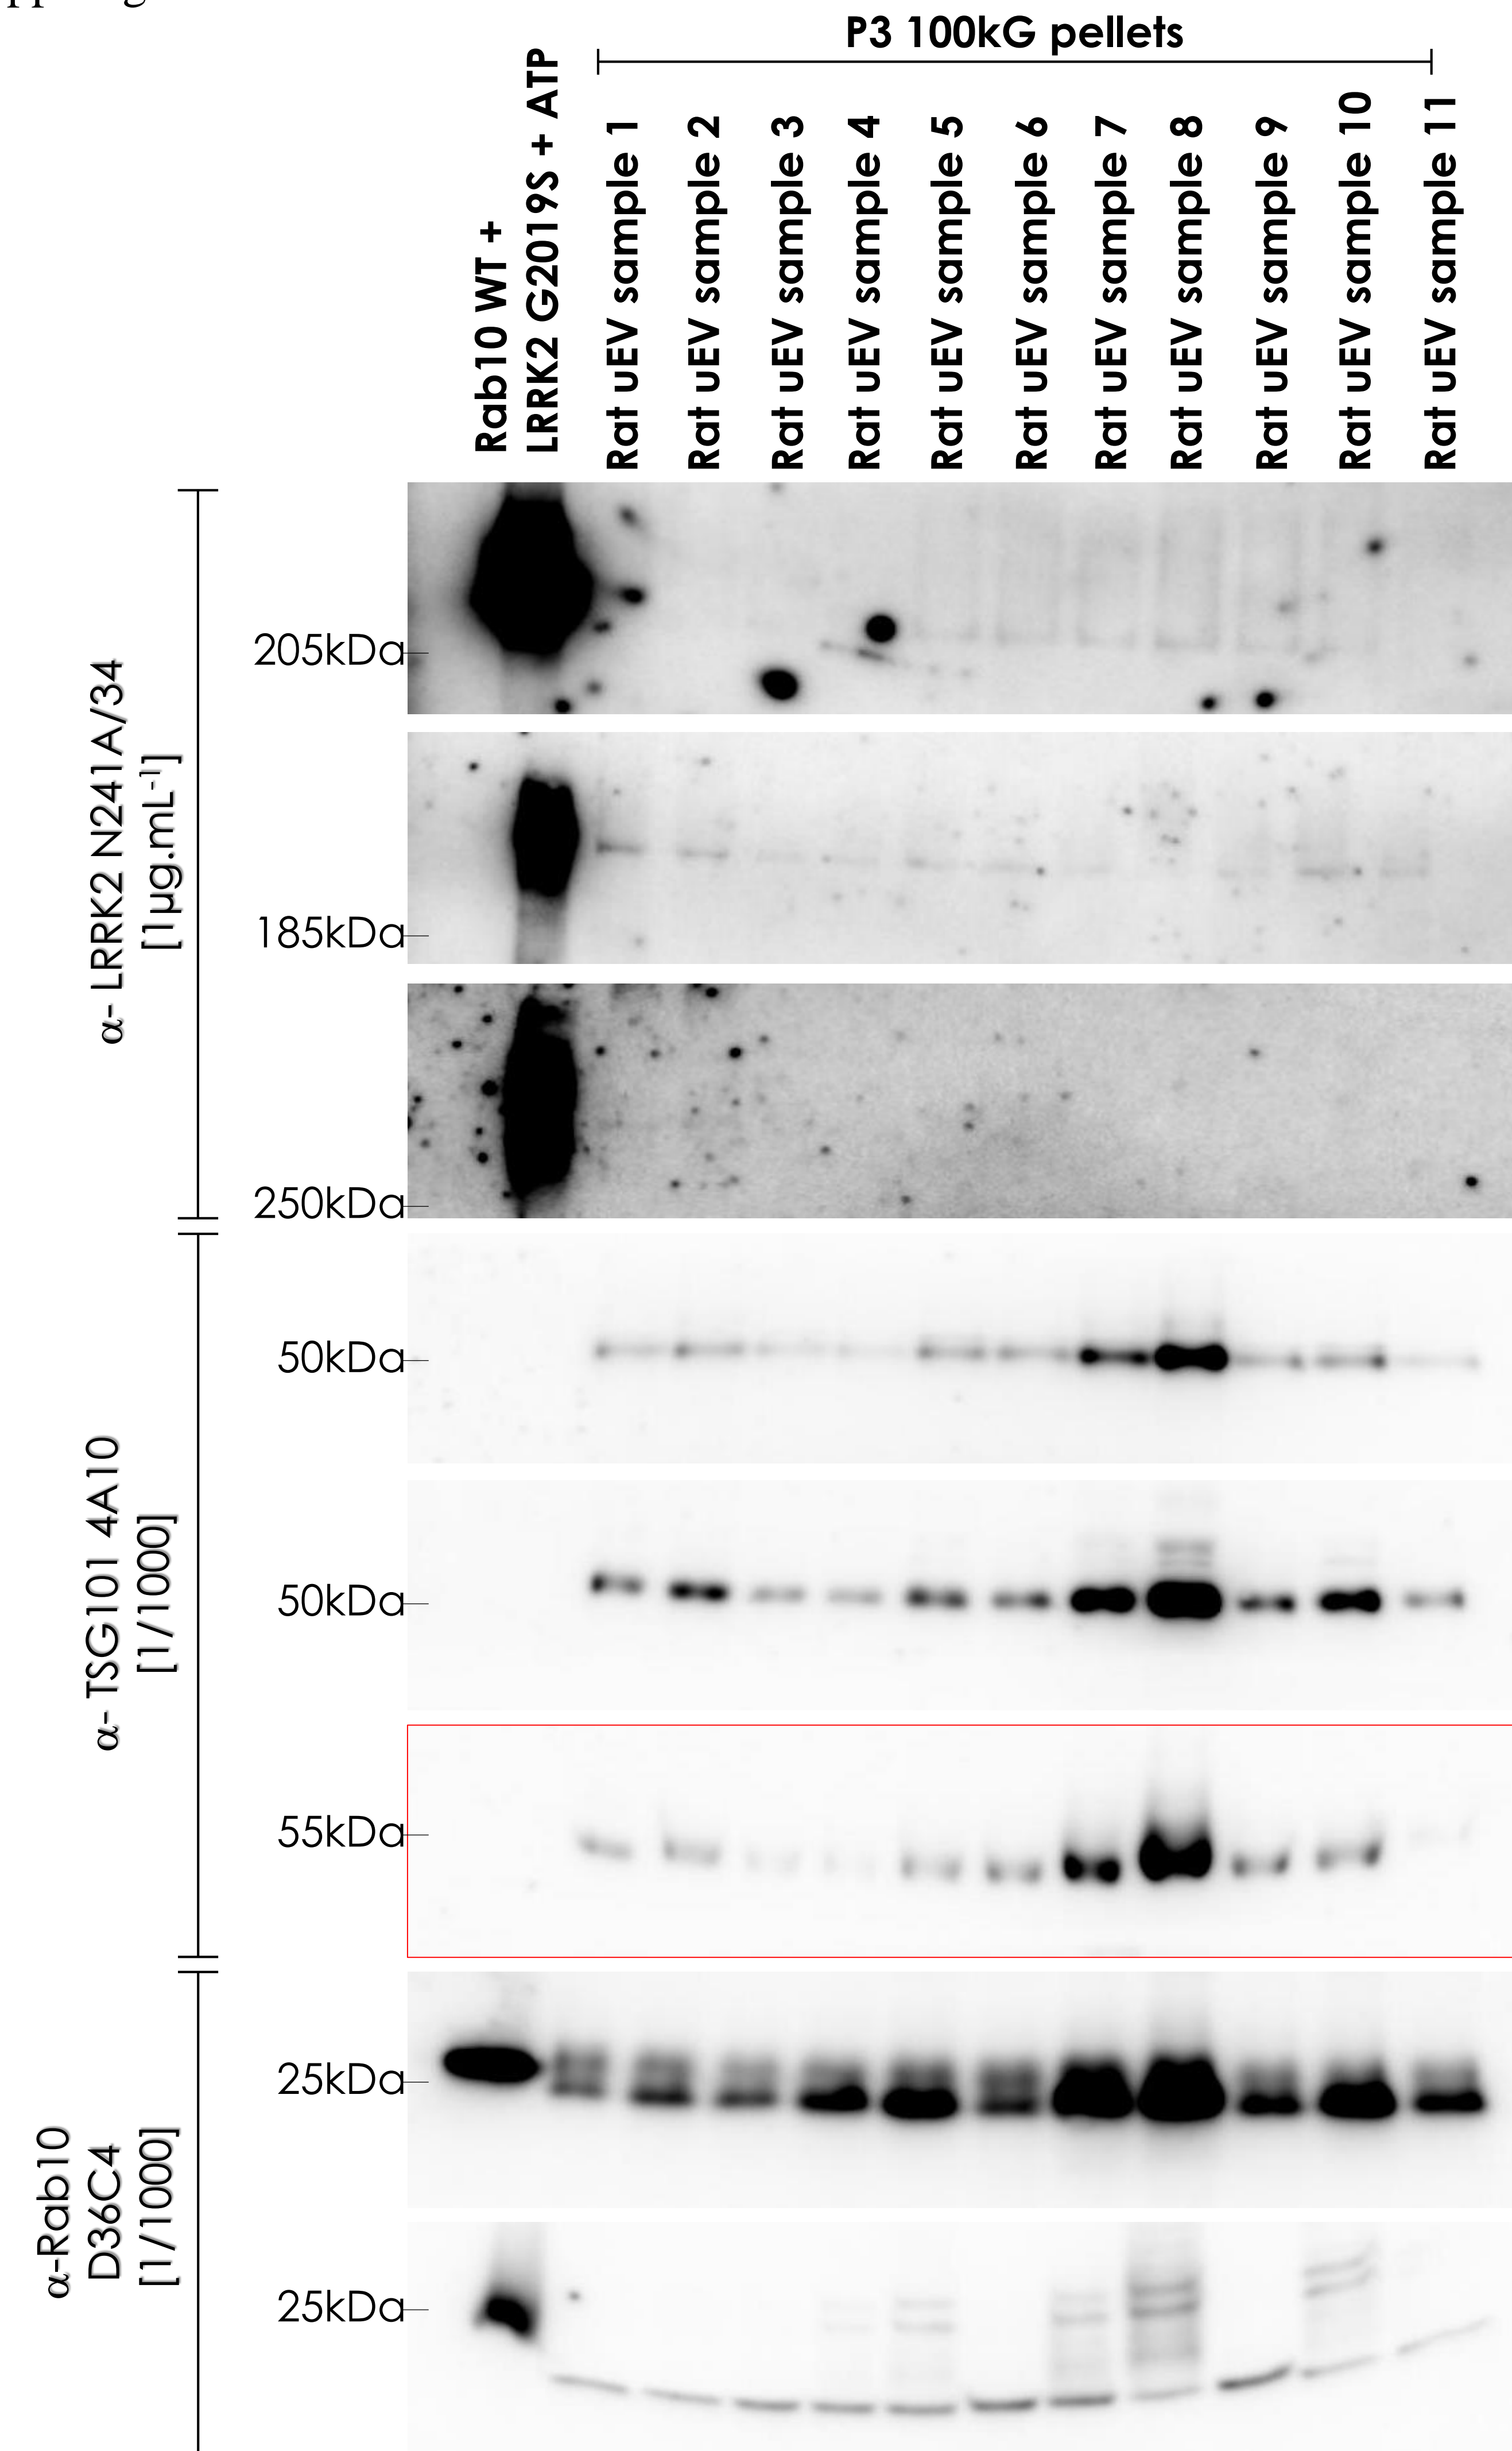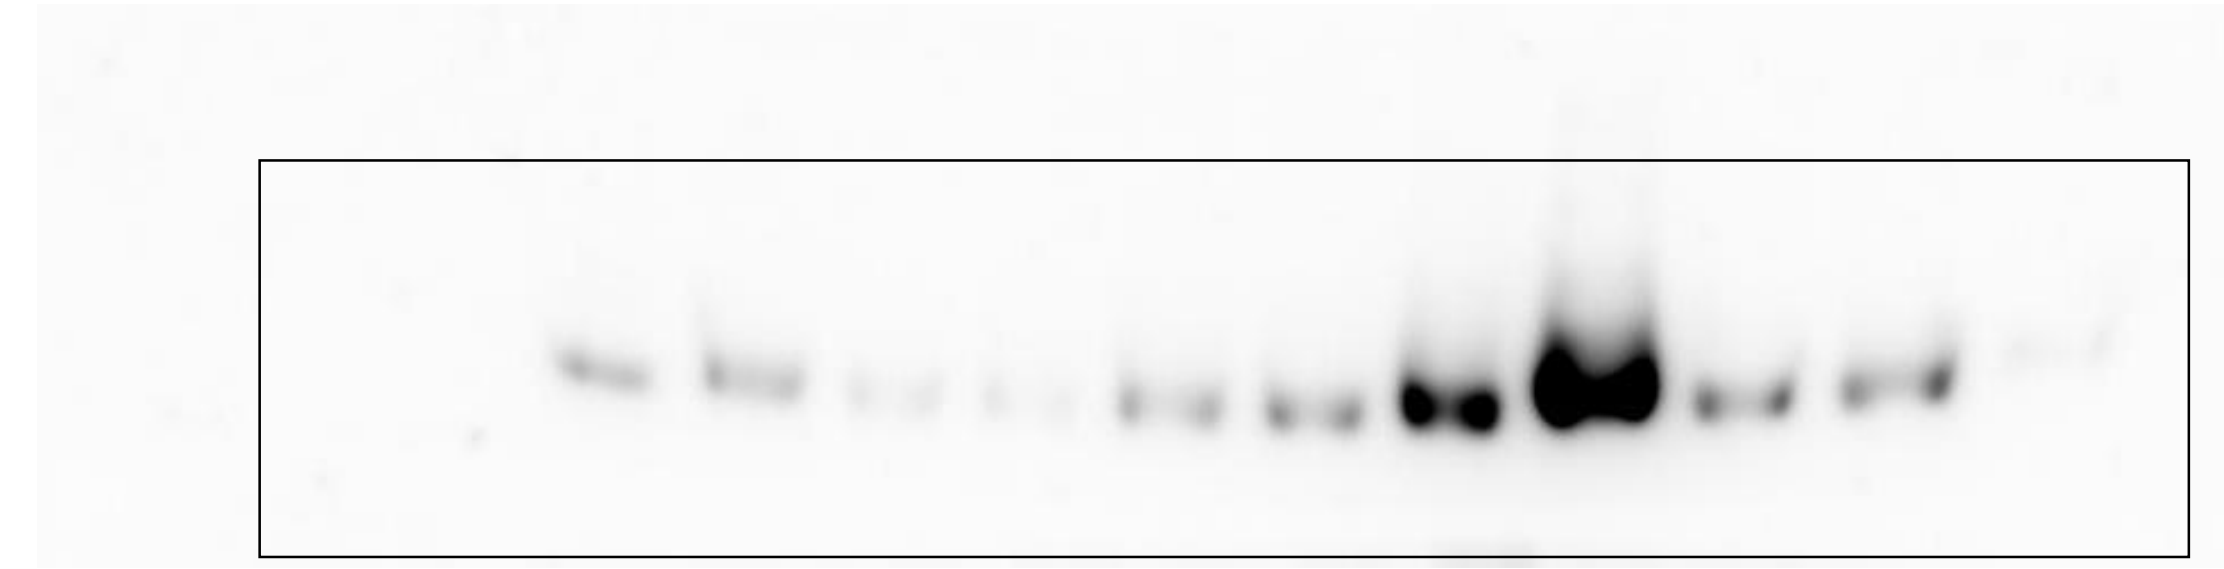

Suppl Figure 13a

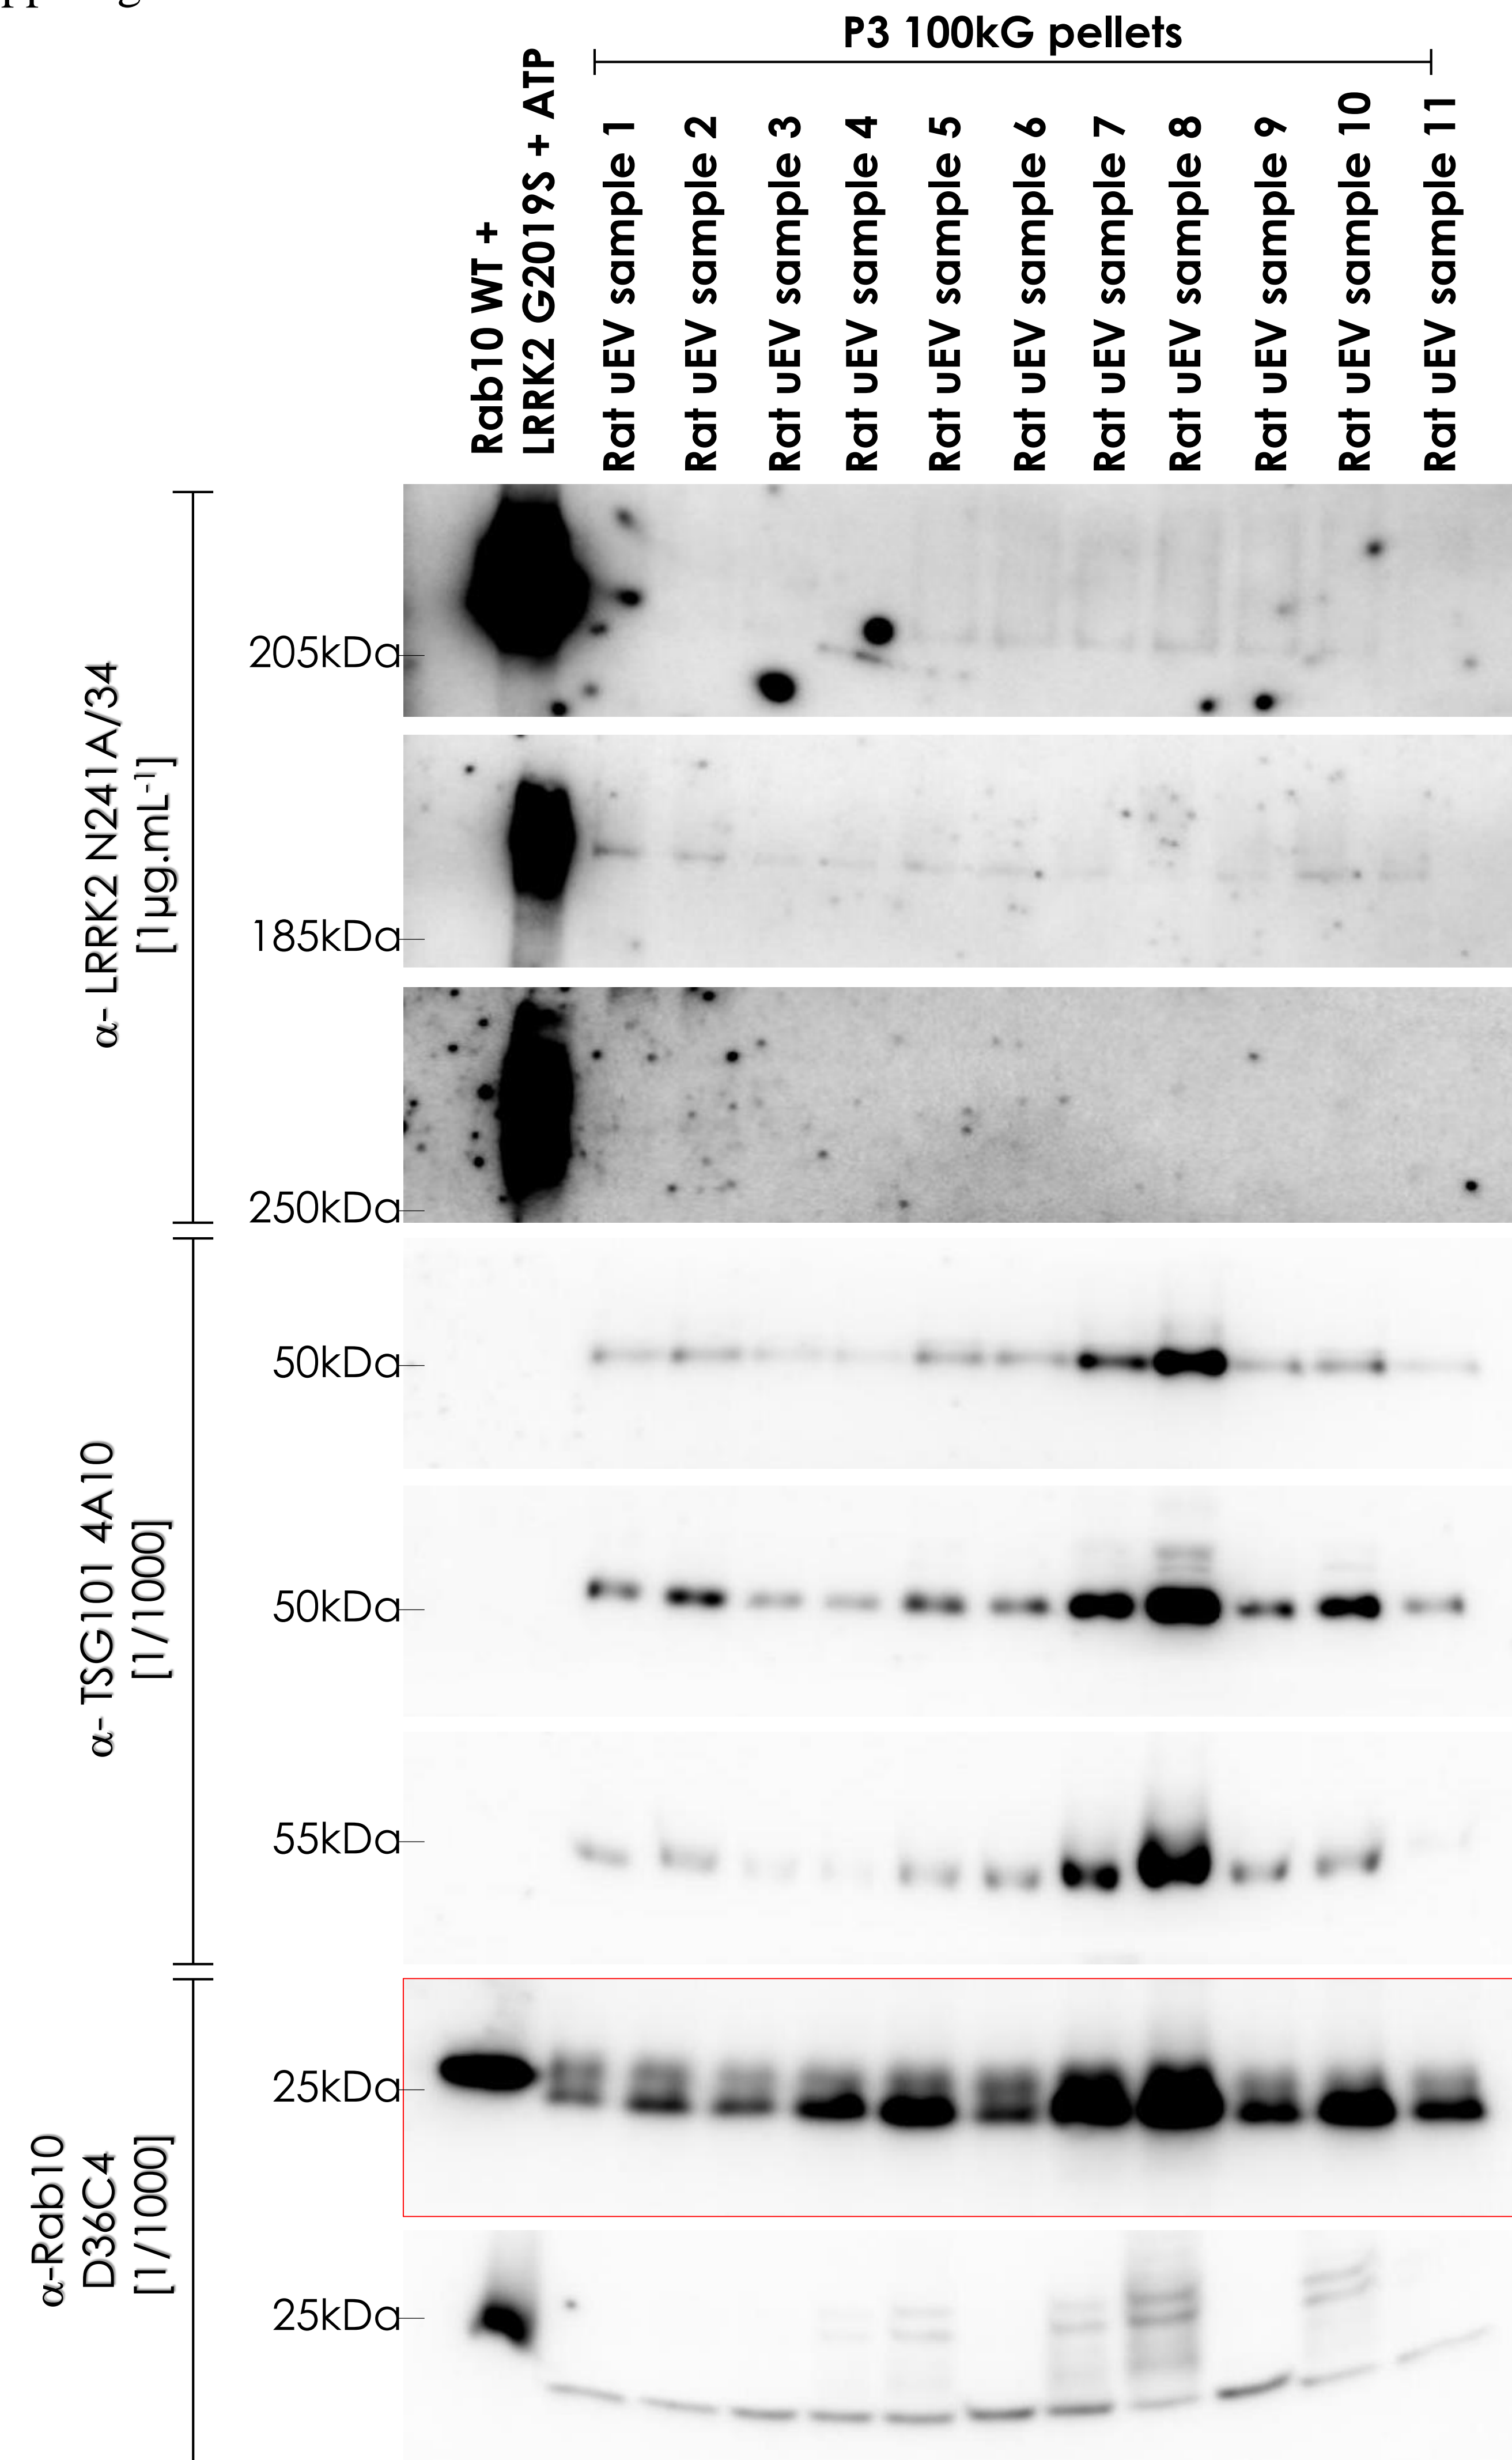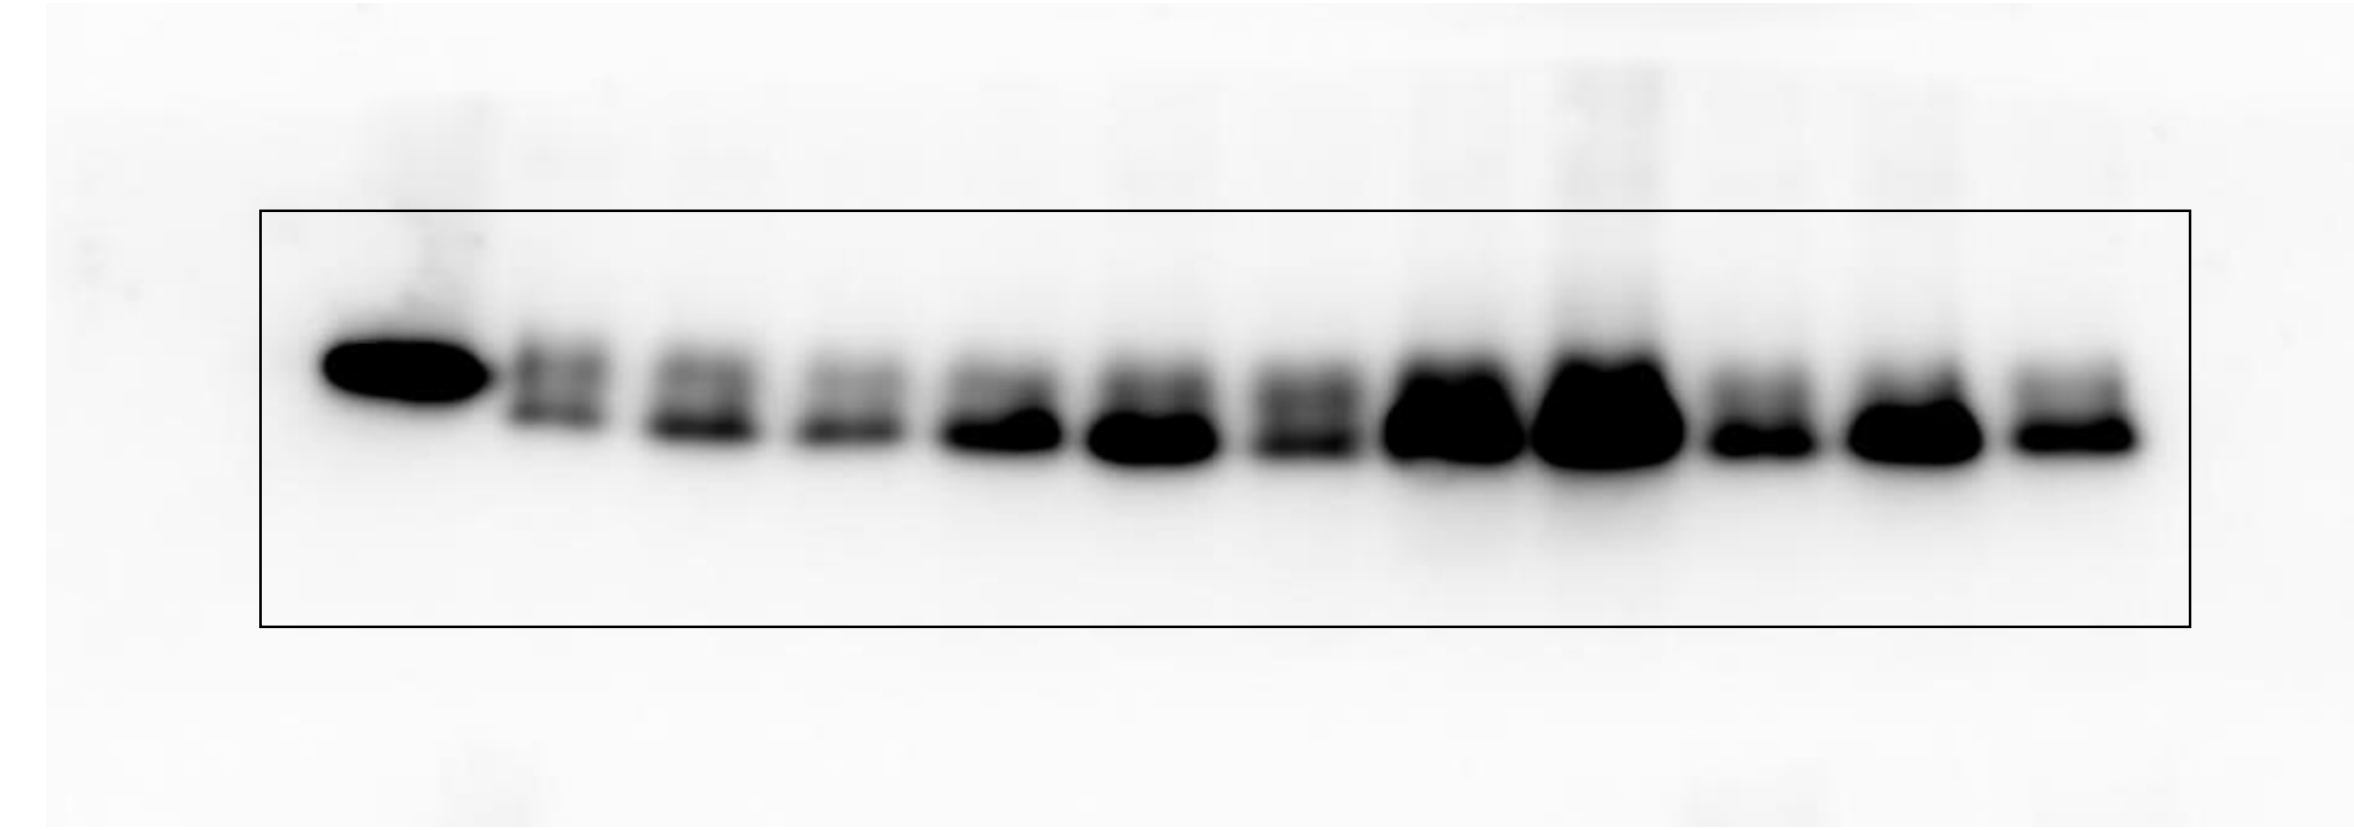

Suppl Figure 13a

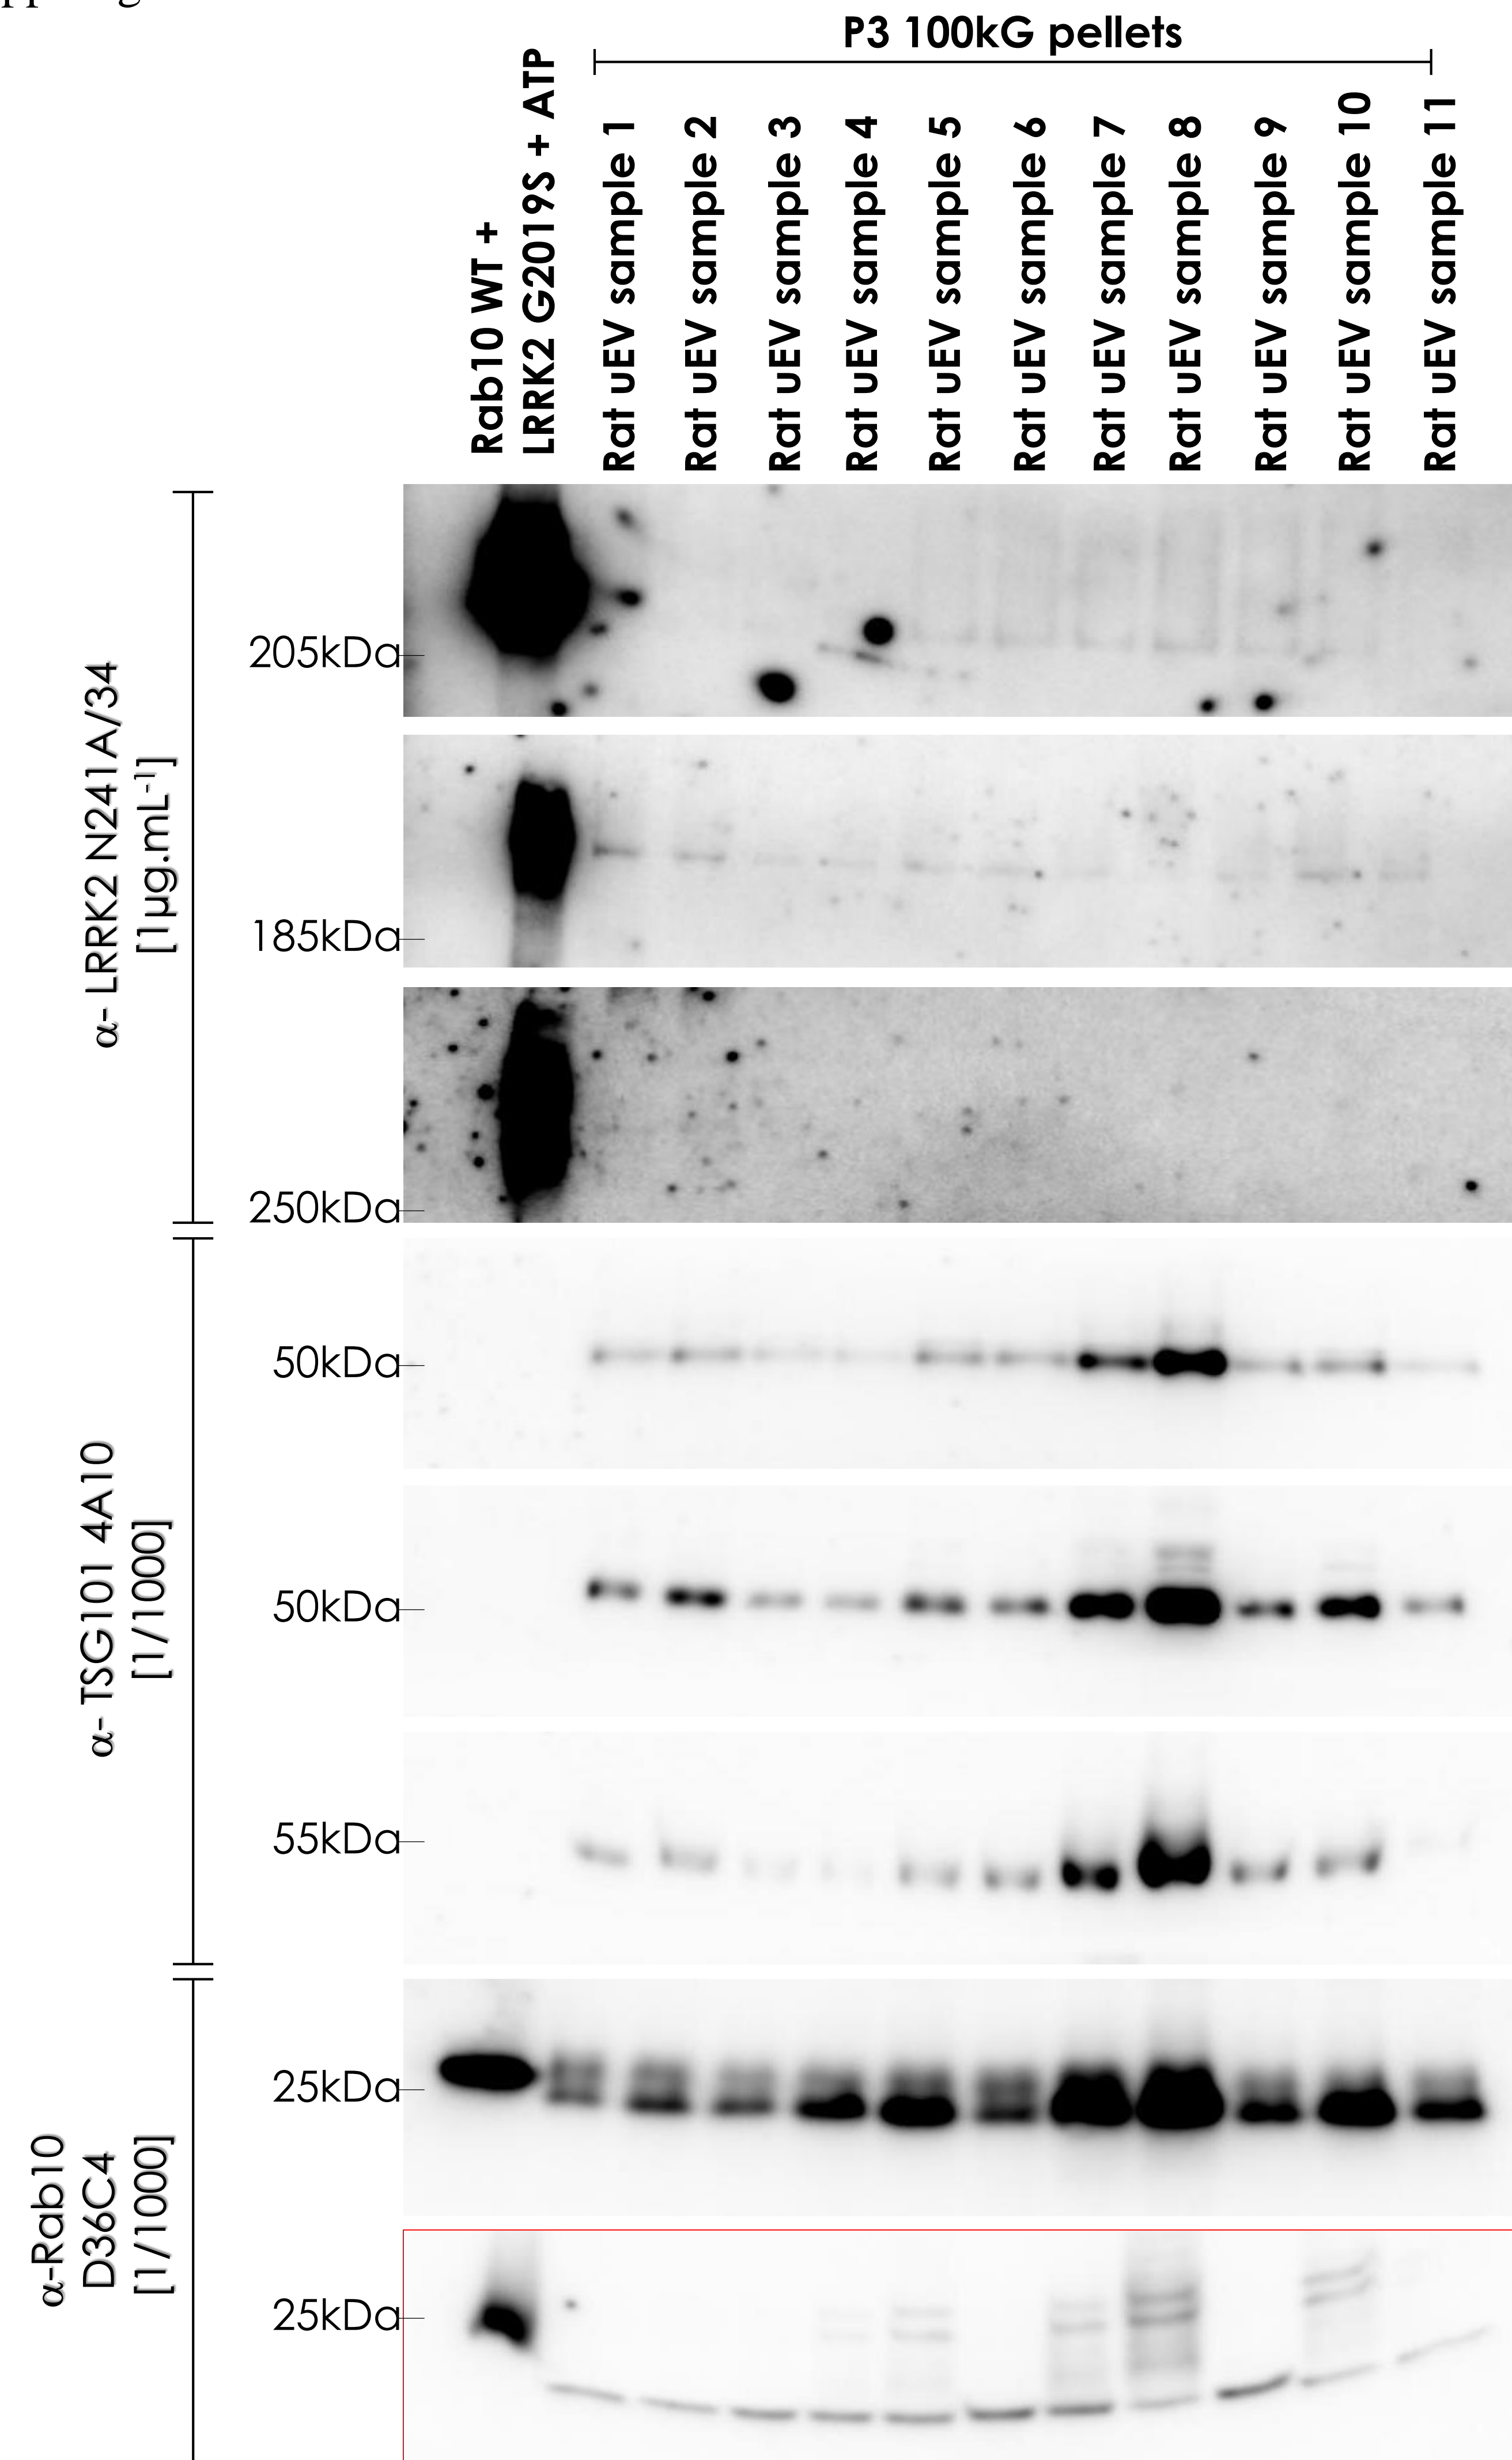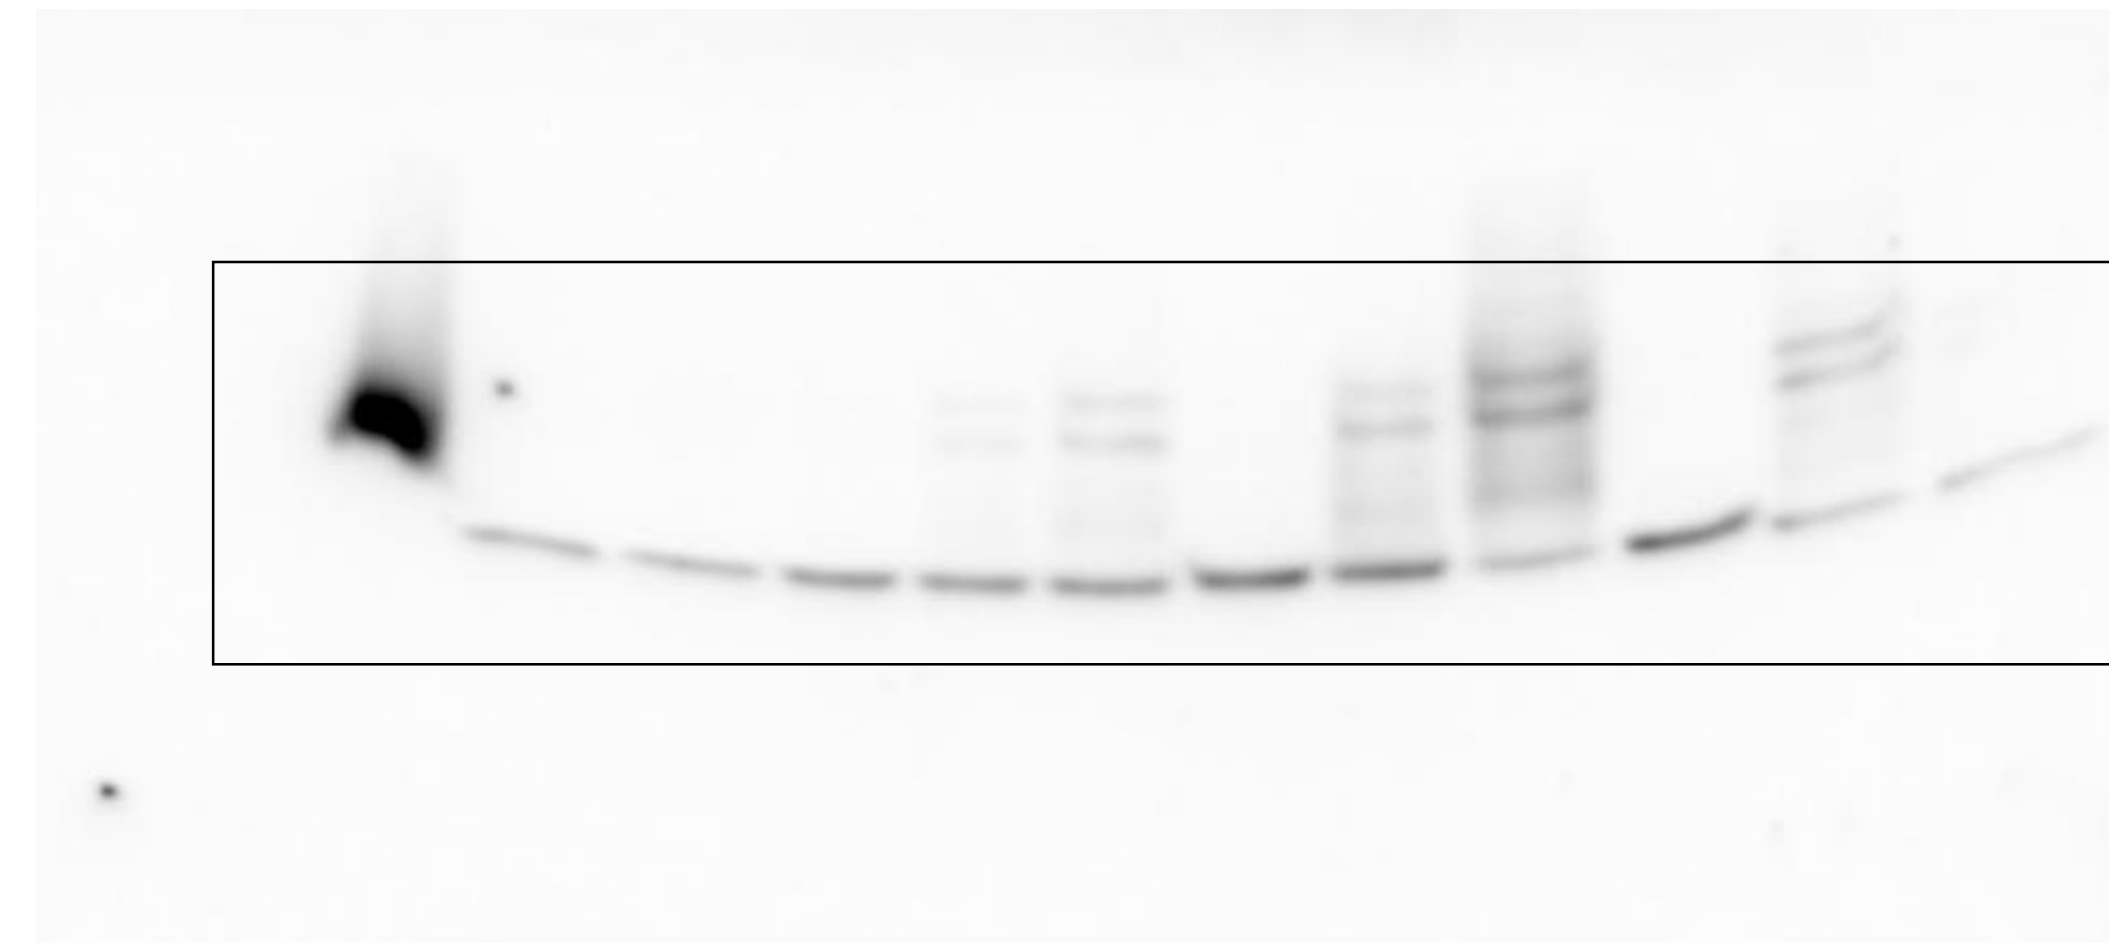

Suppl Figure 13b

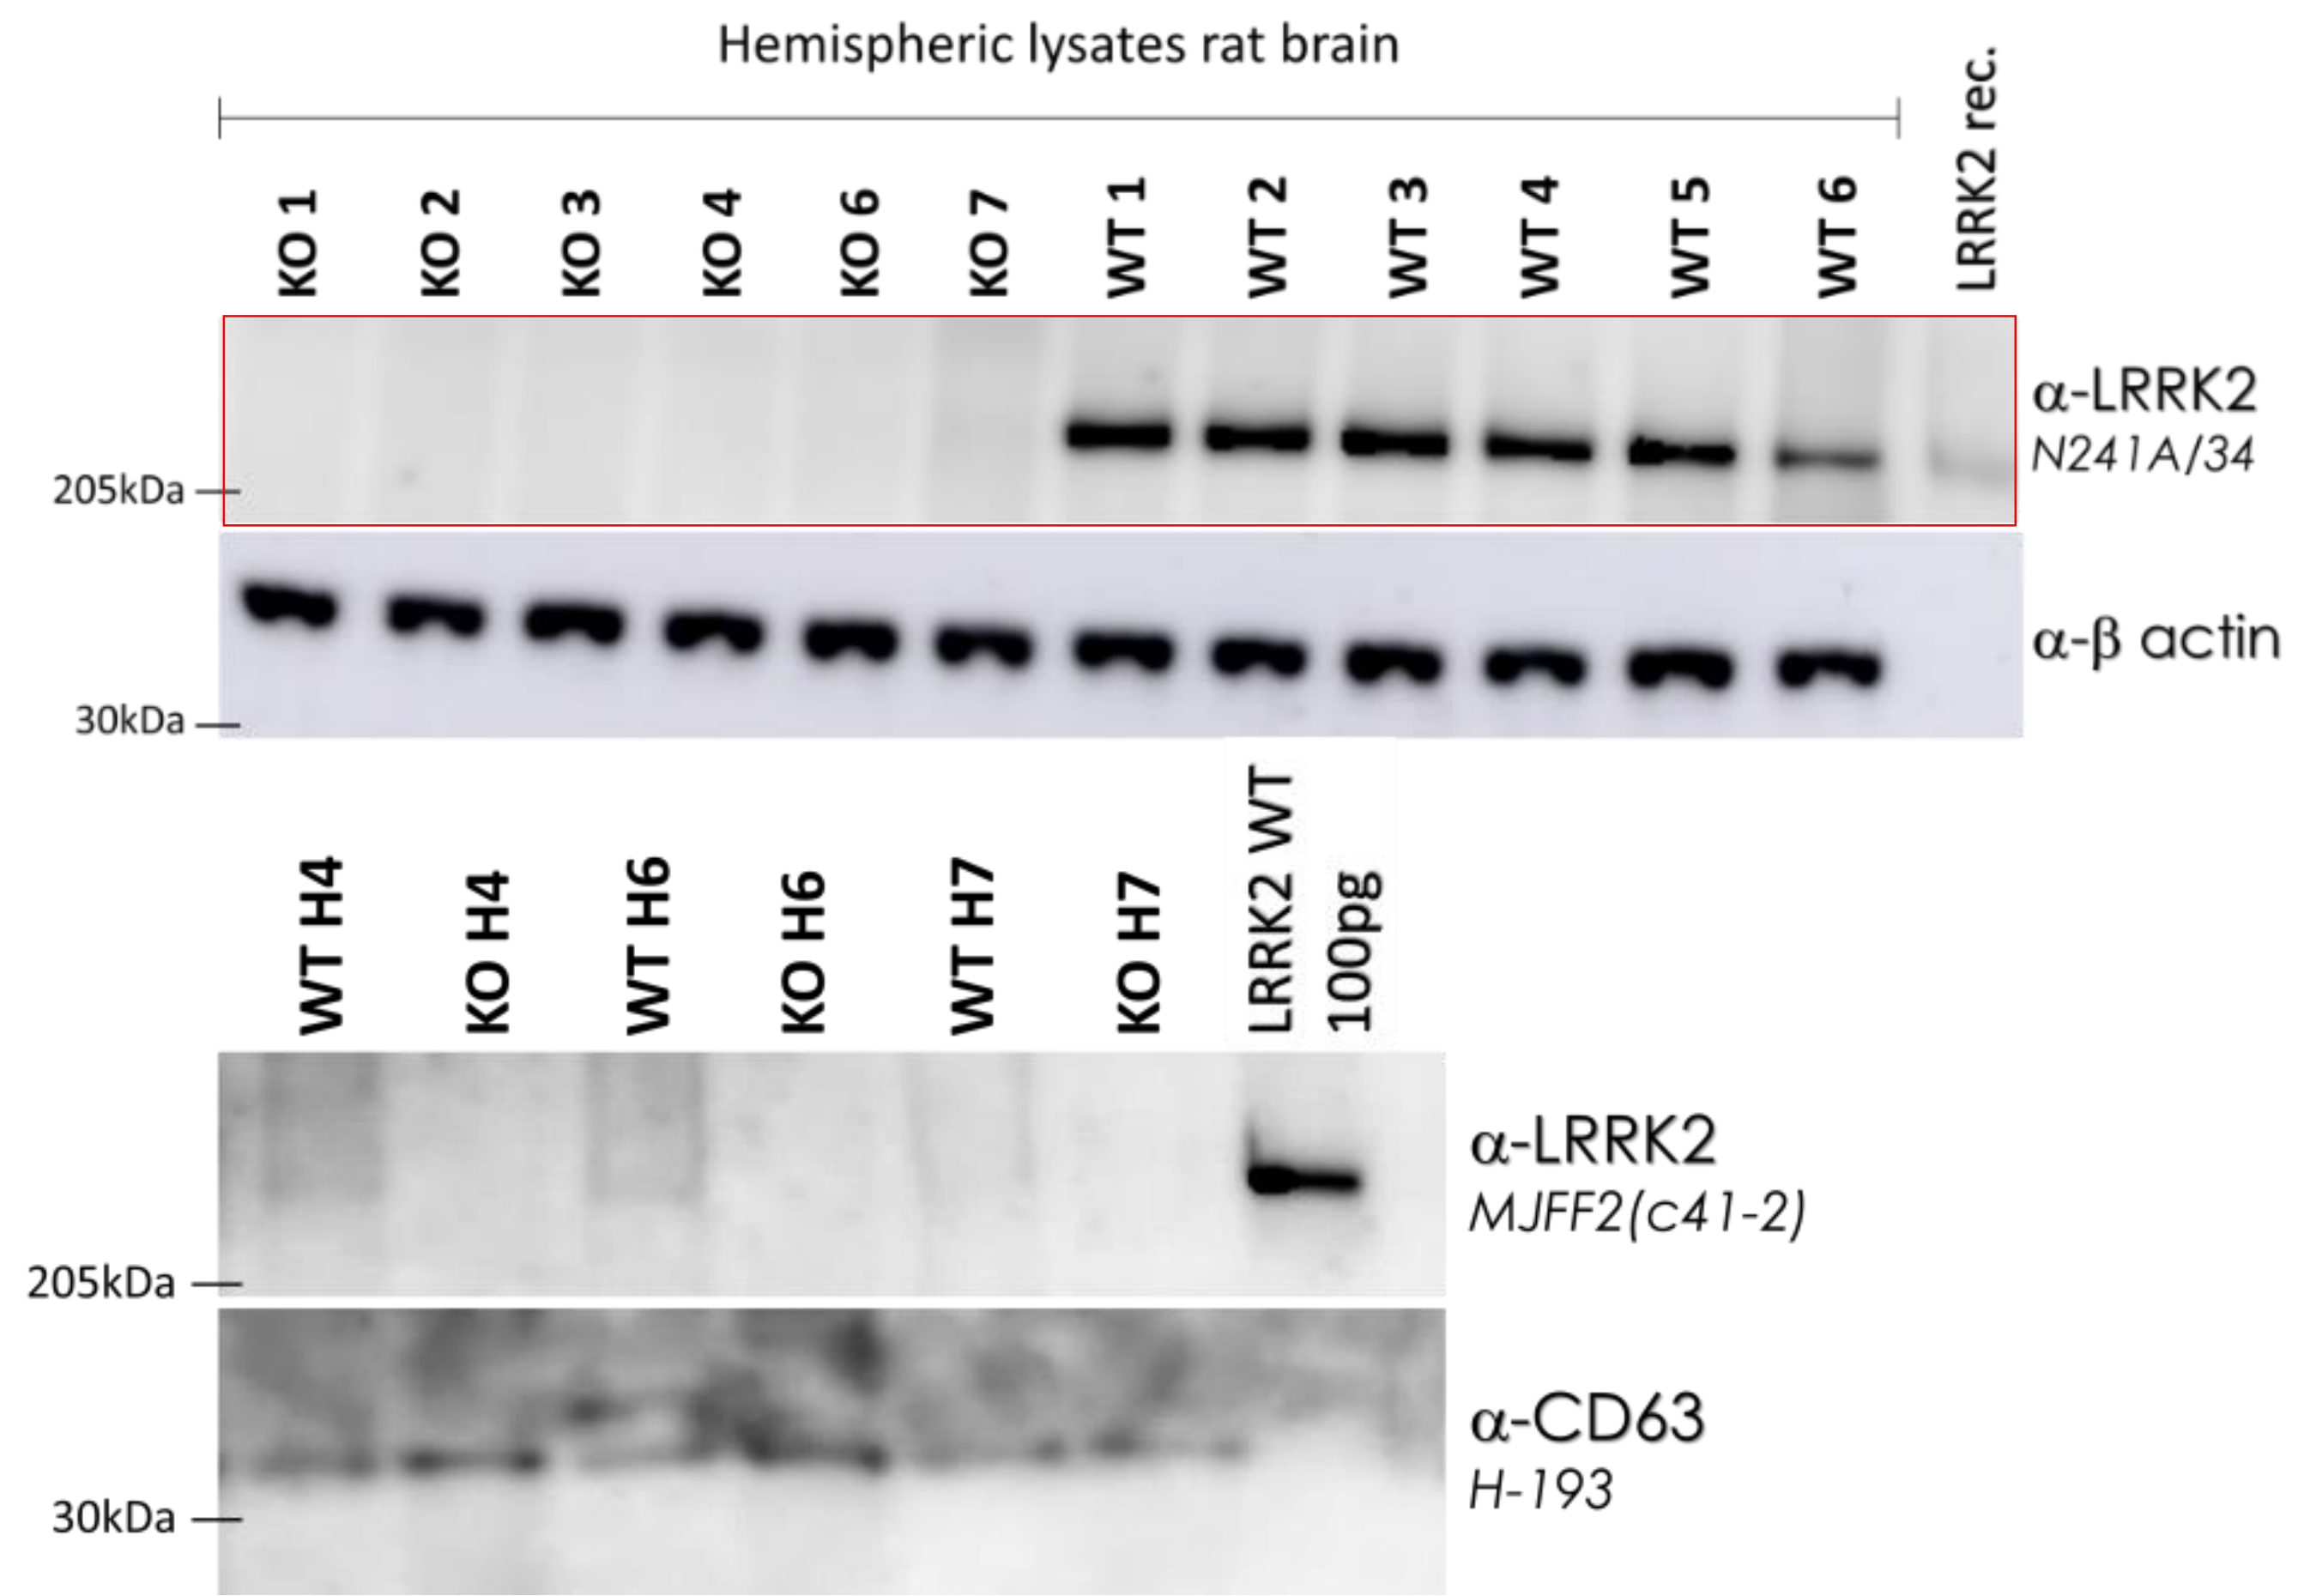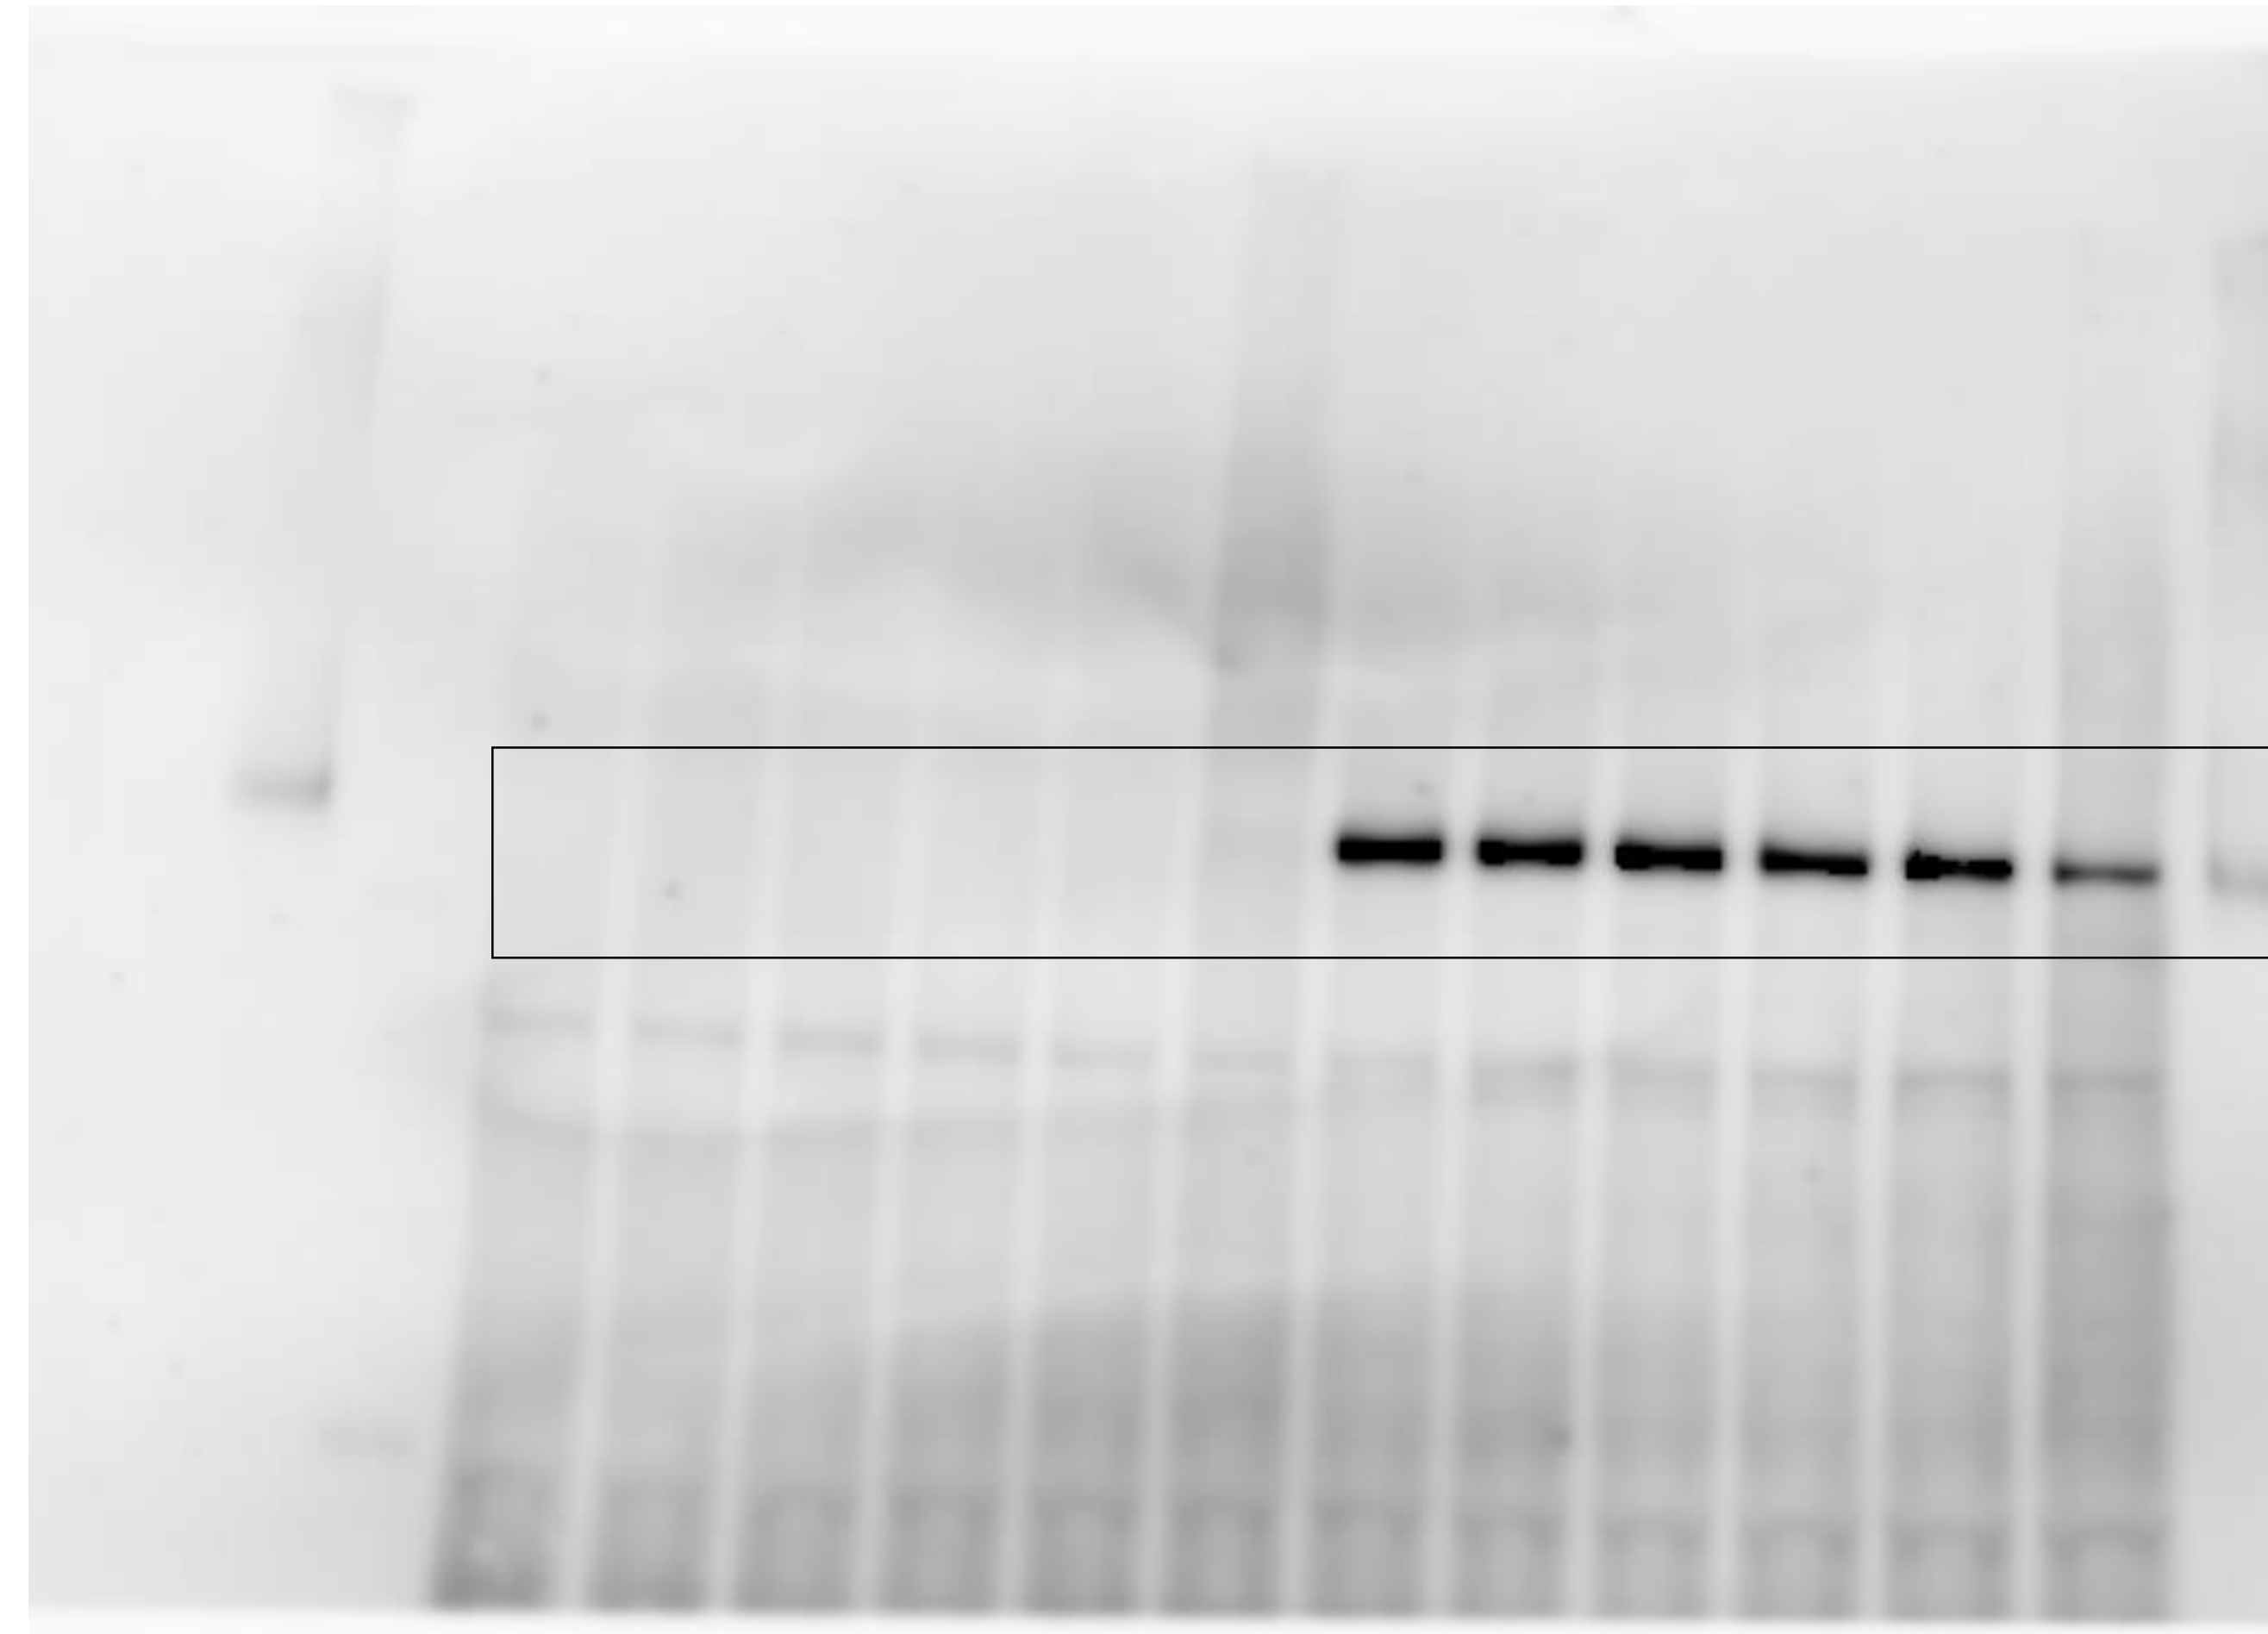

Suppl Figure 13b

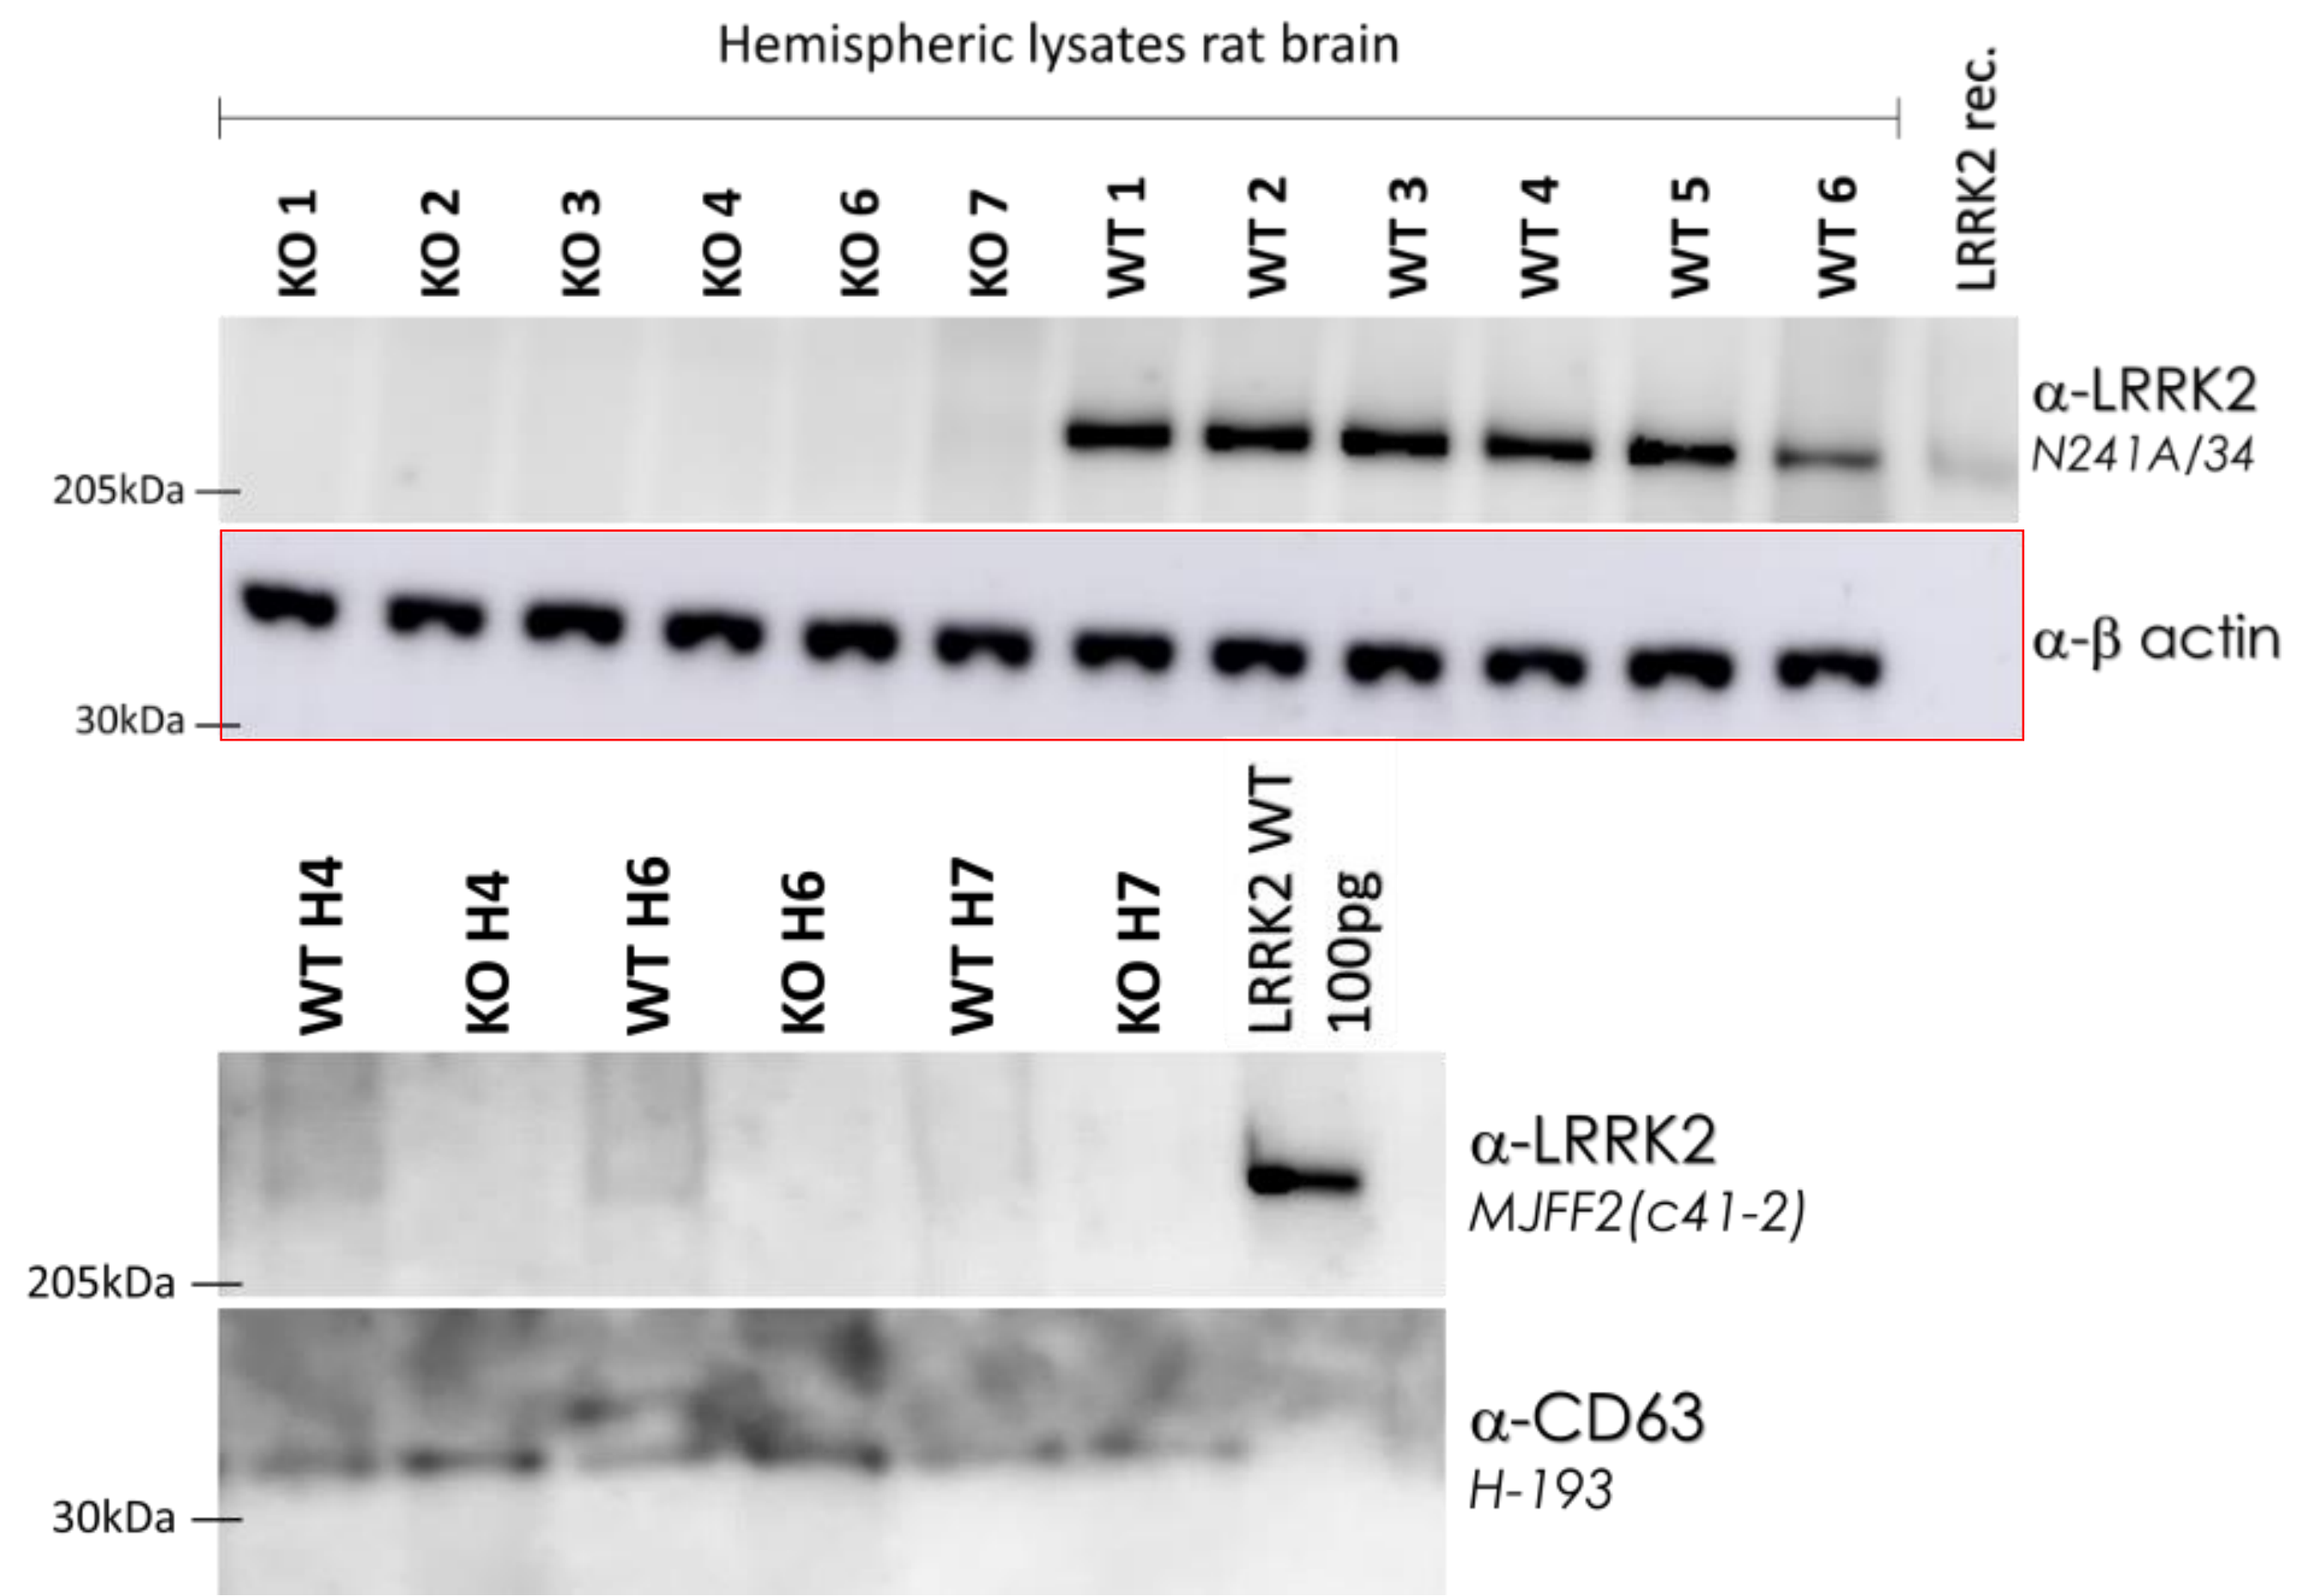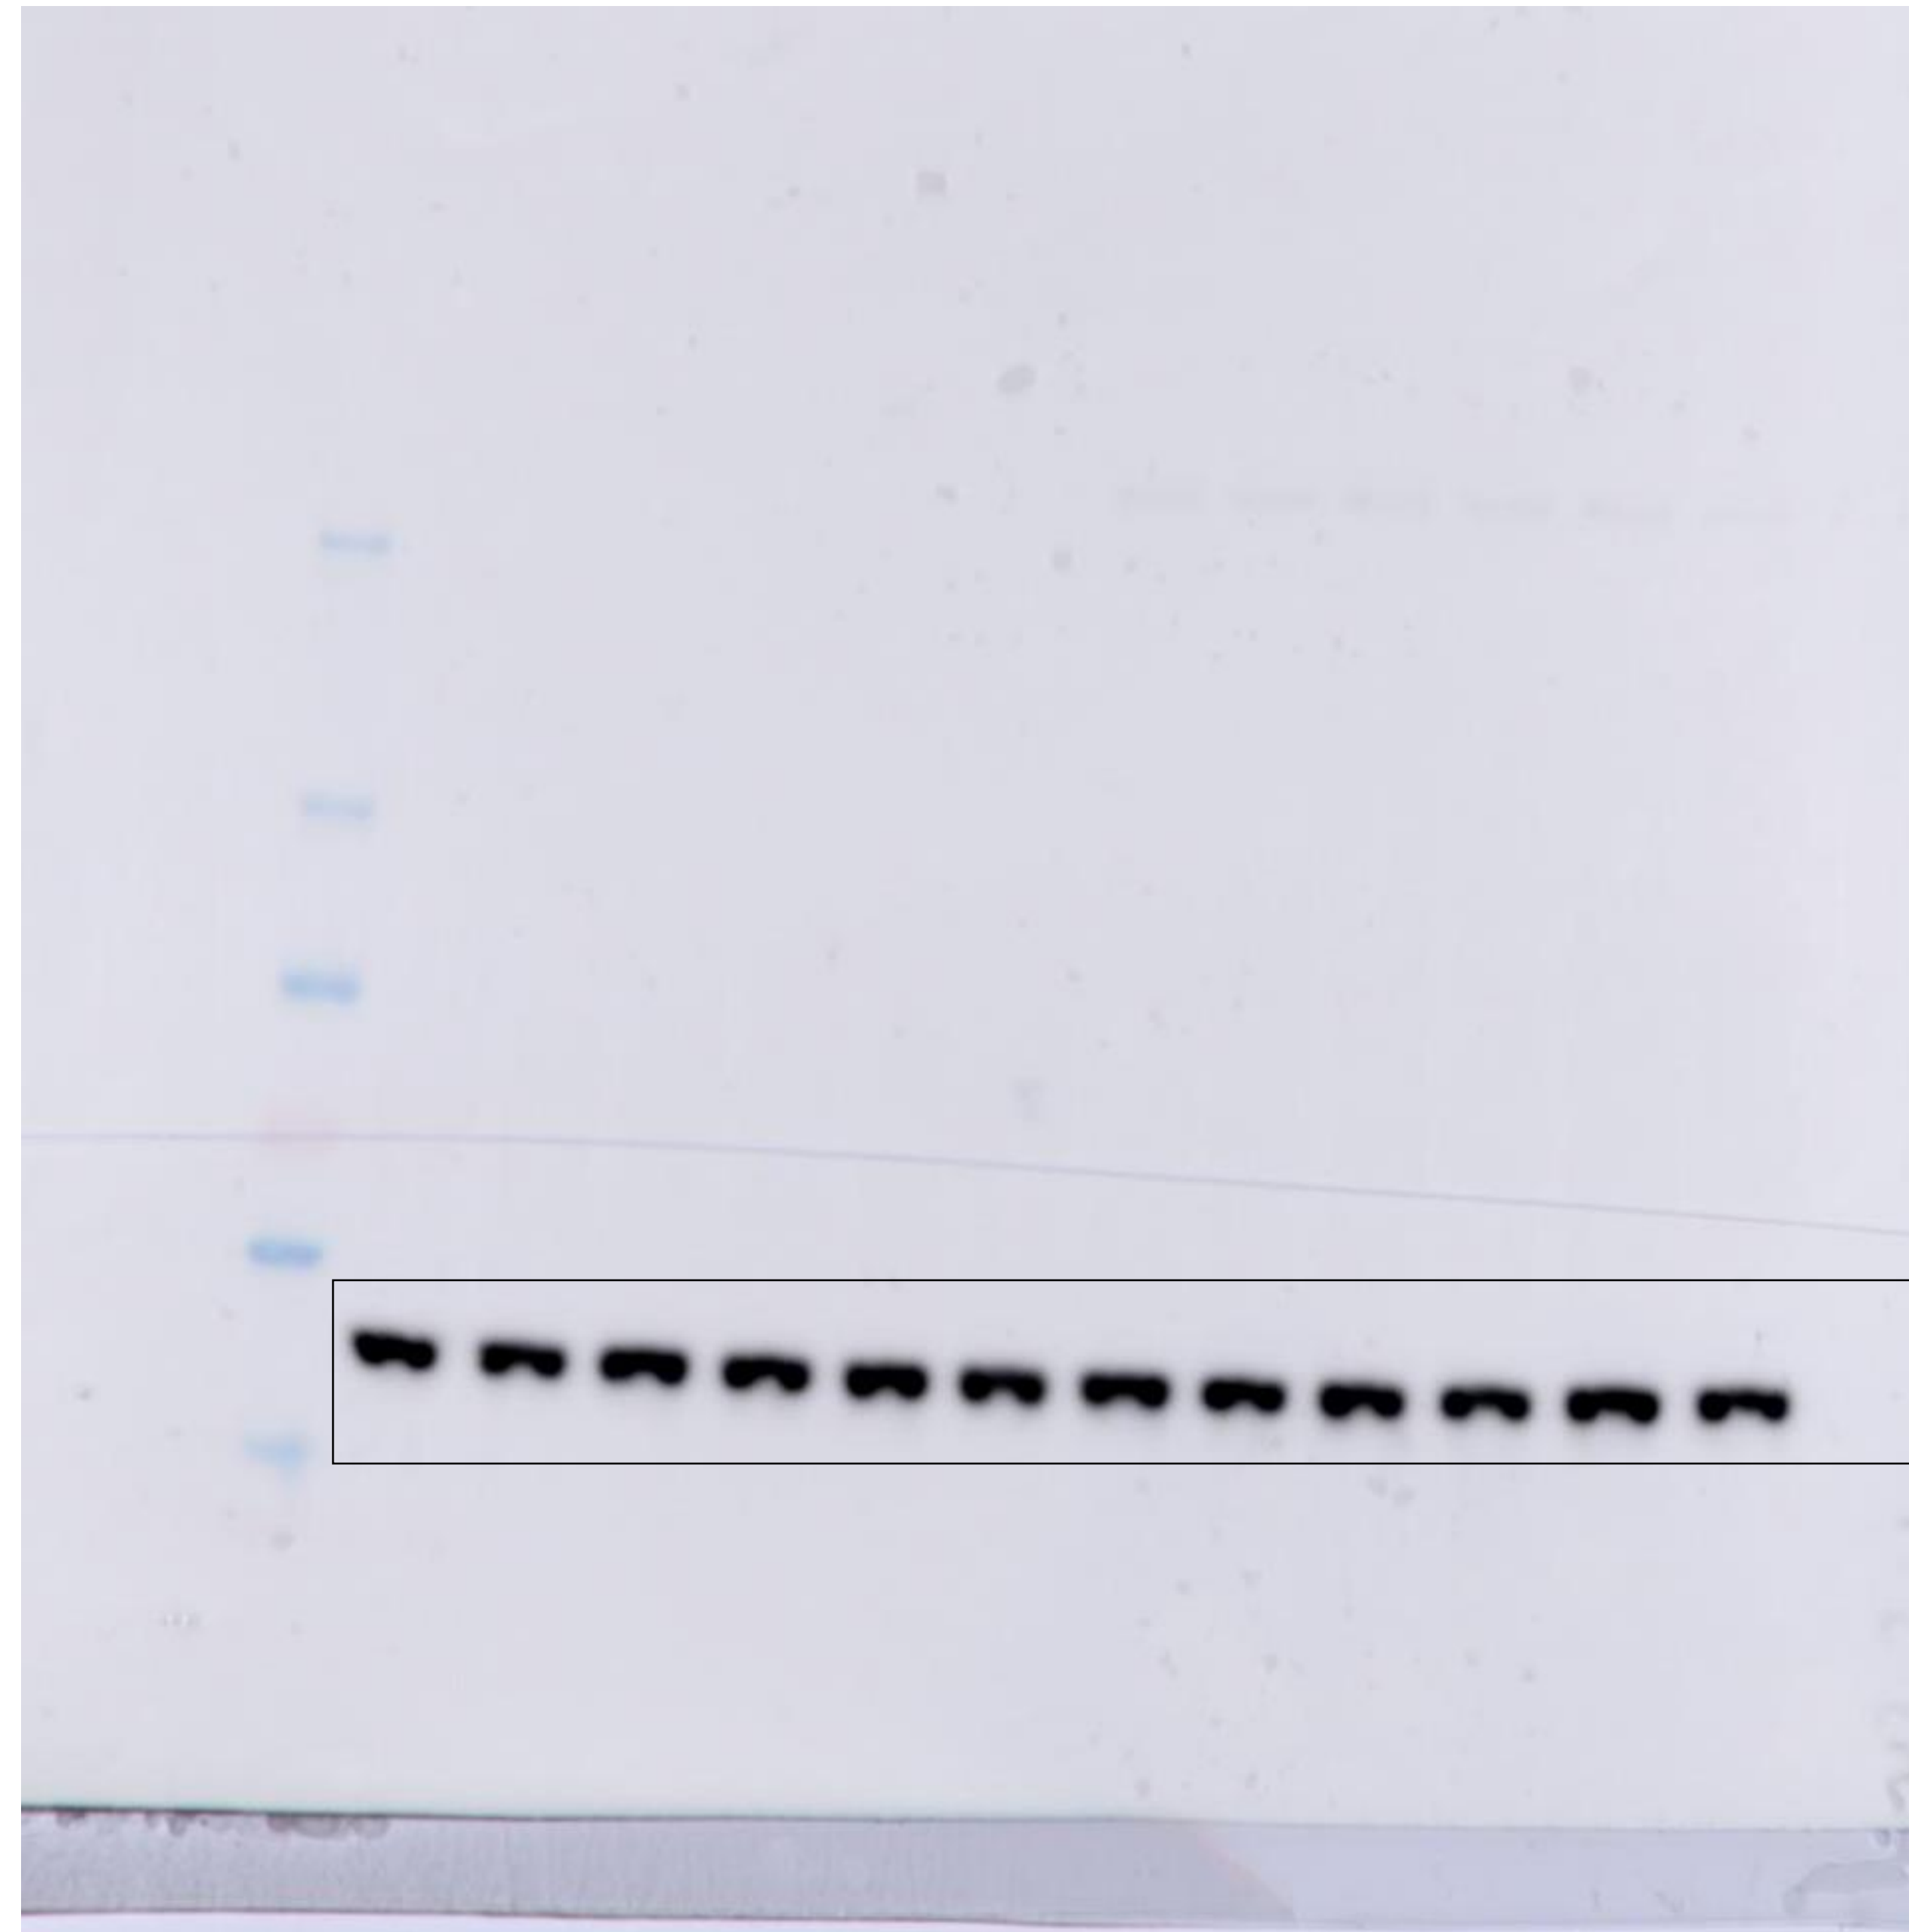

Suppl Figure 13b

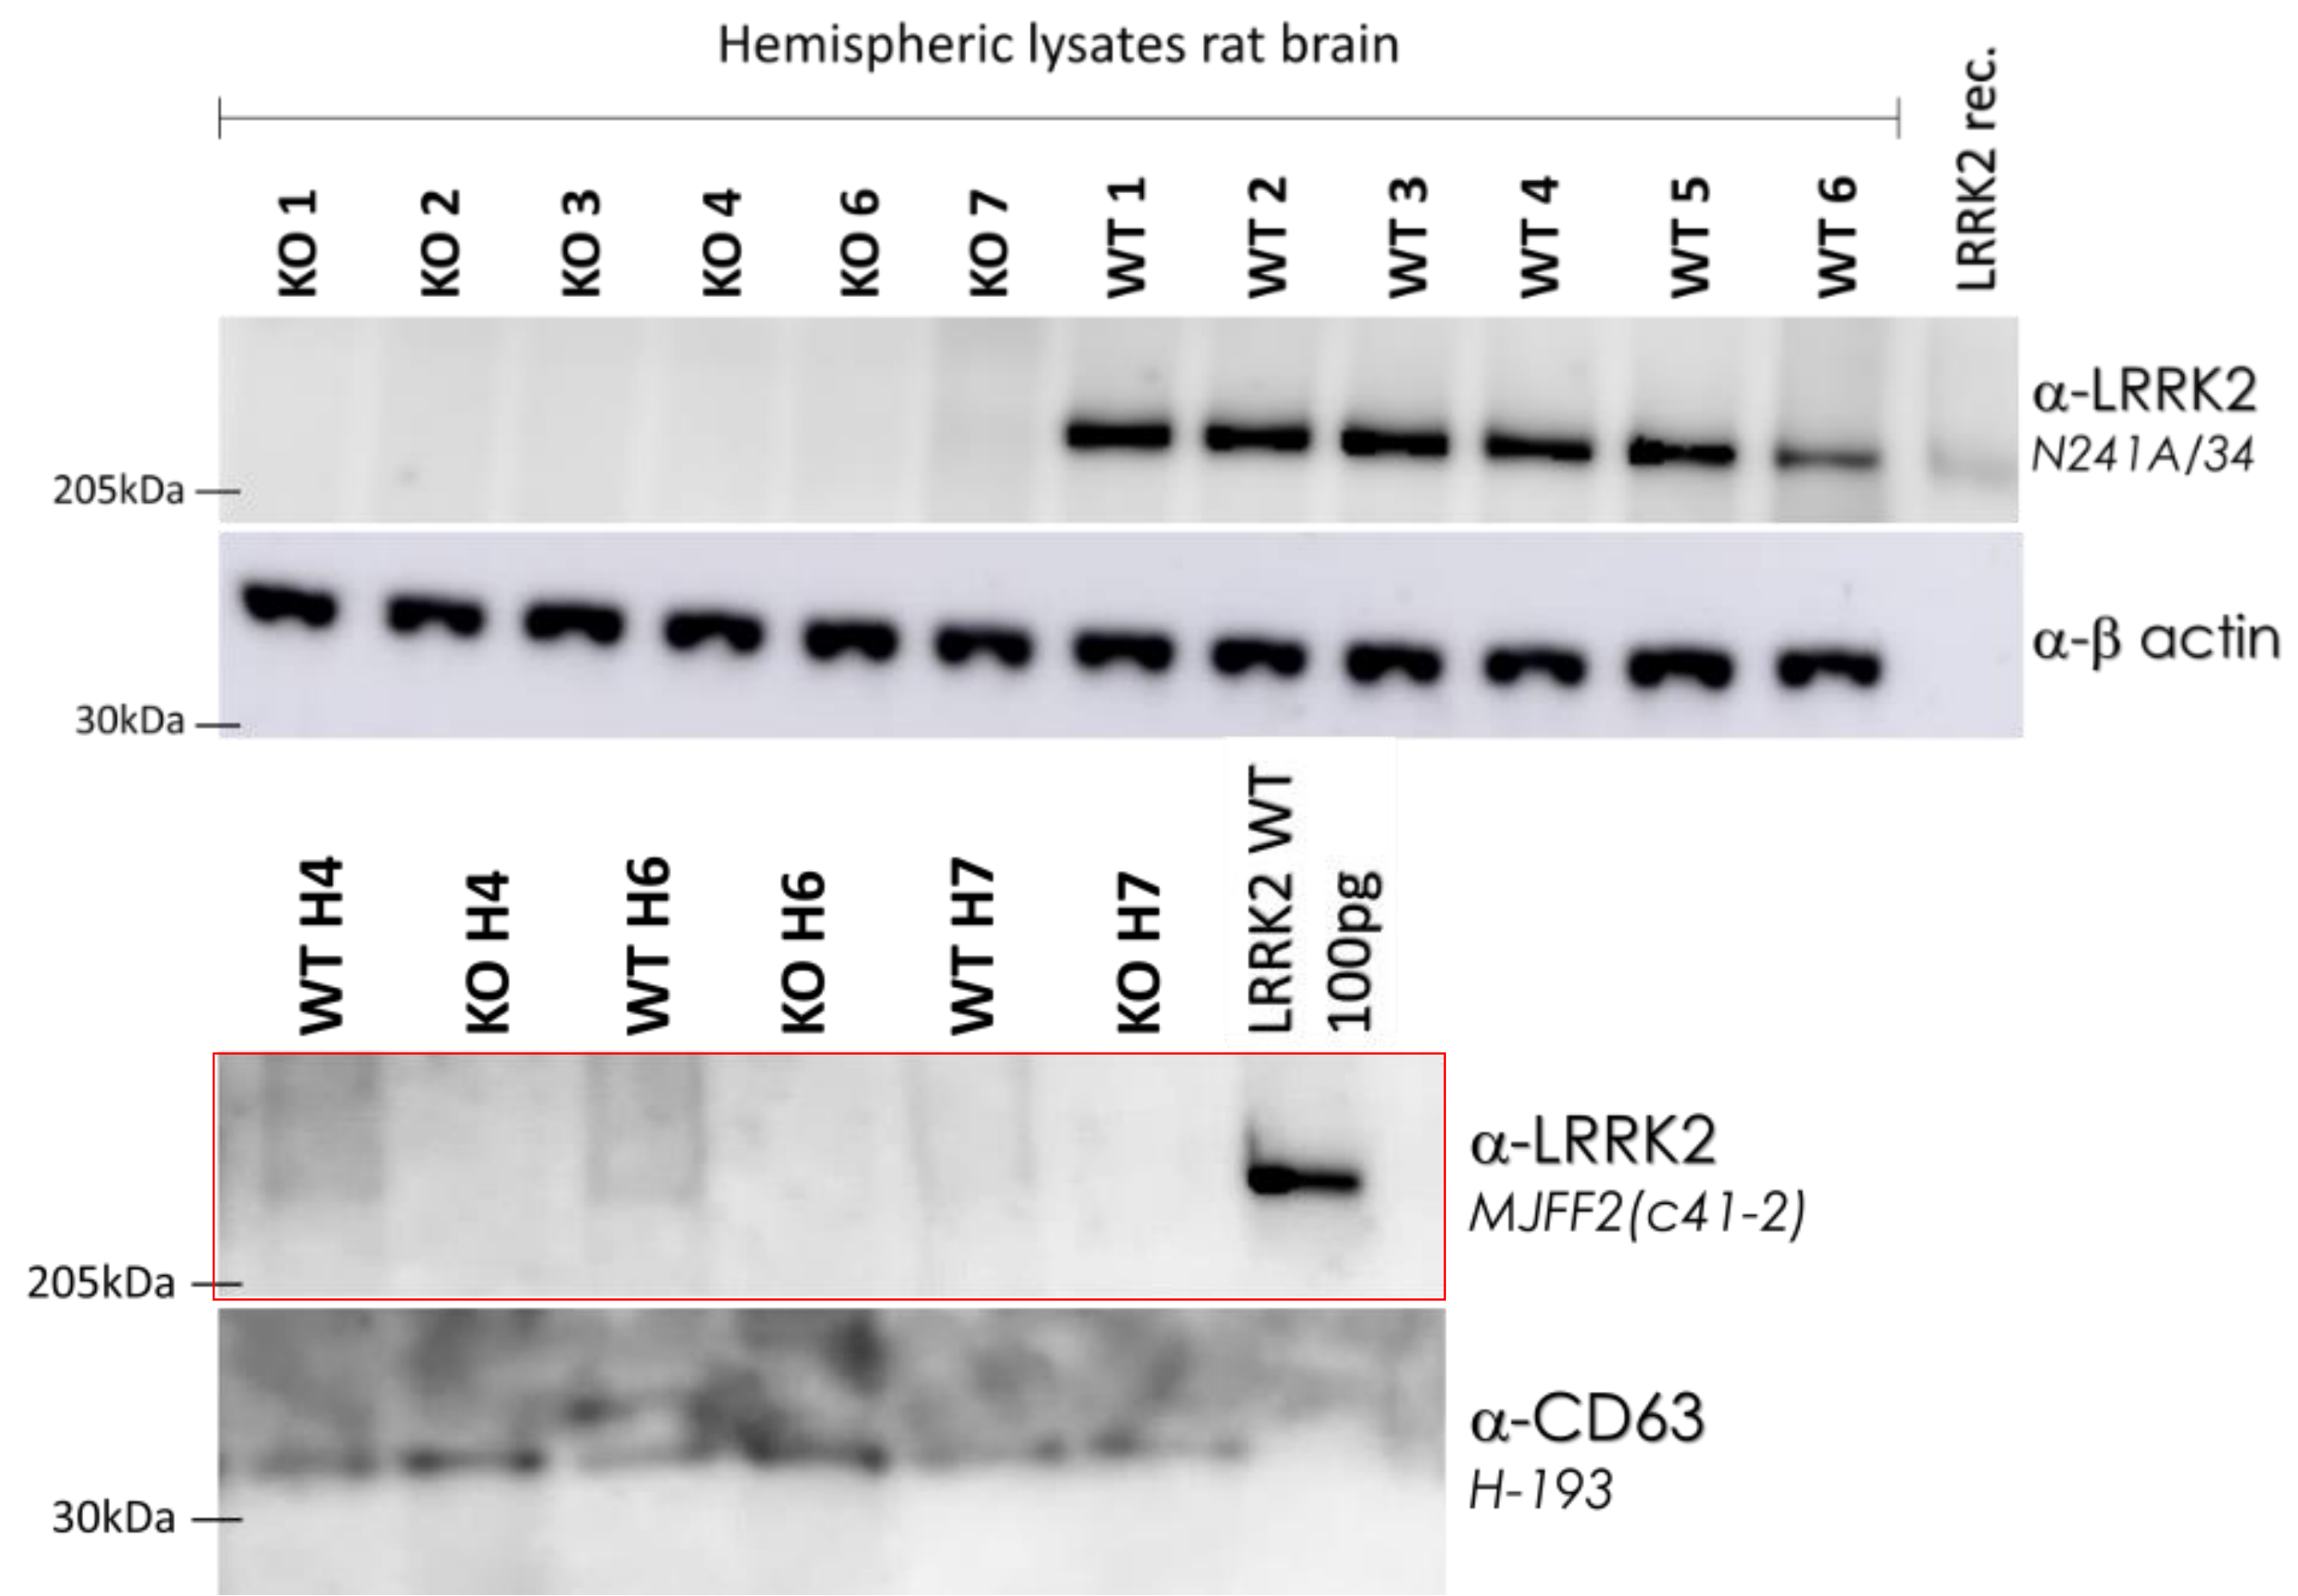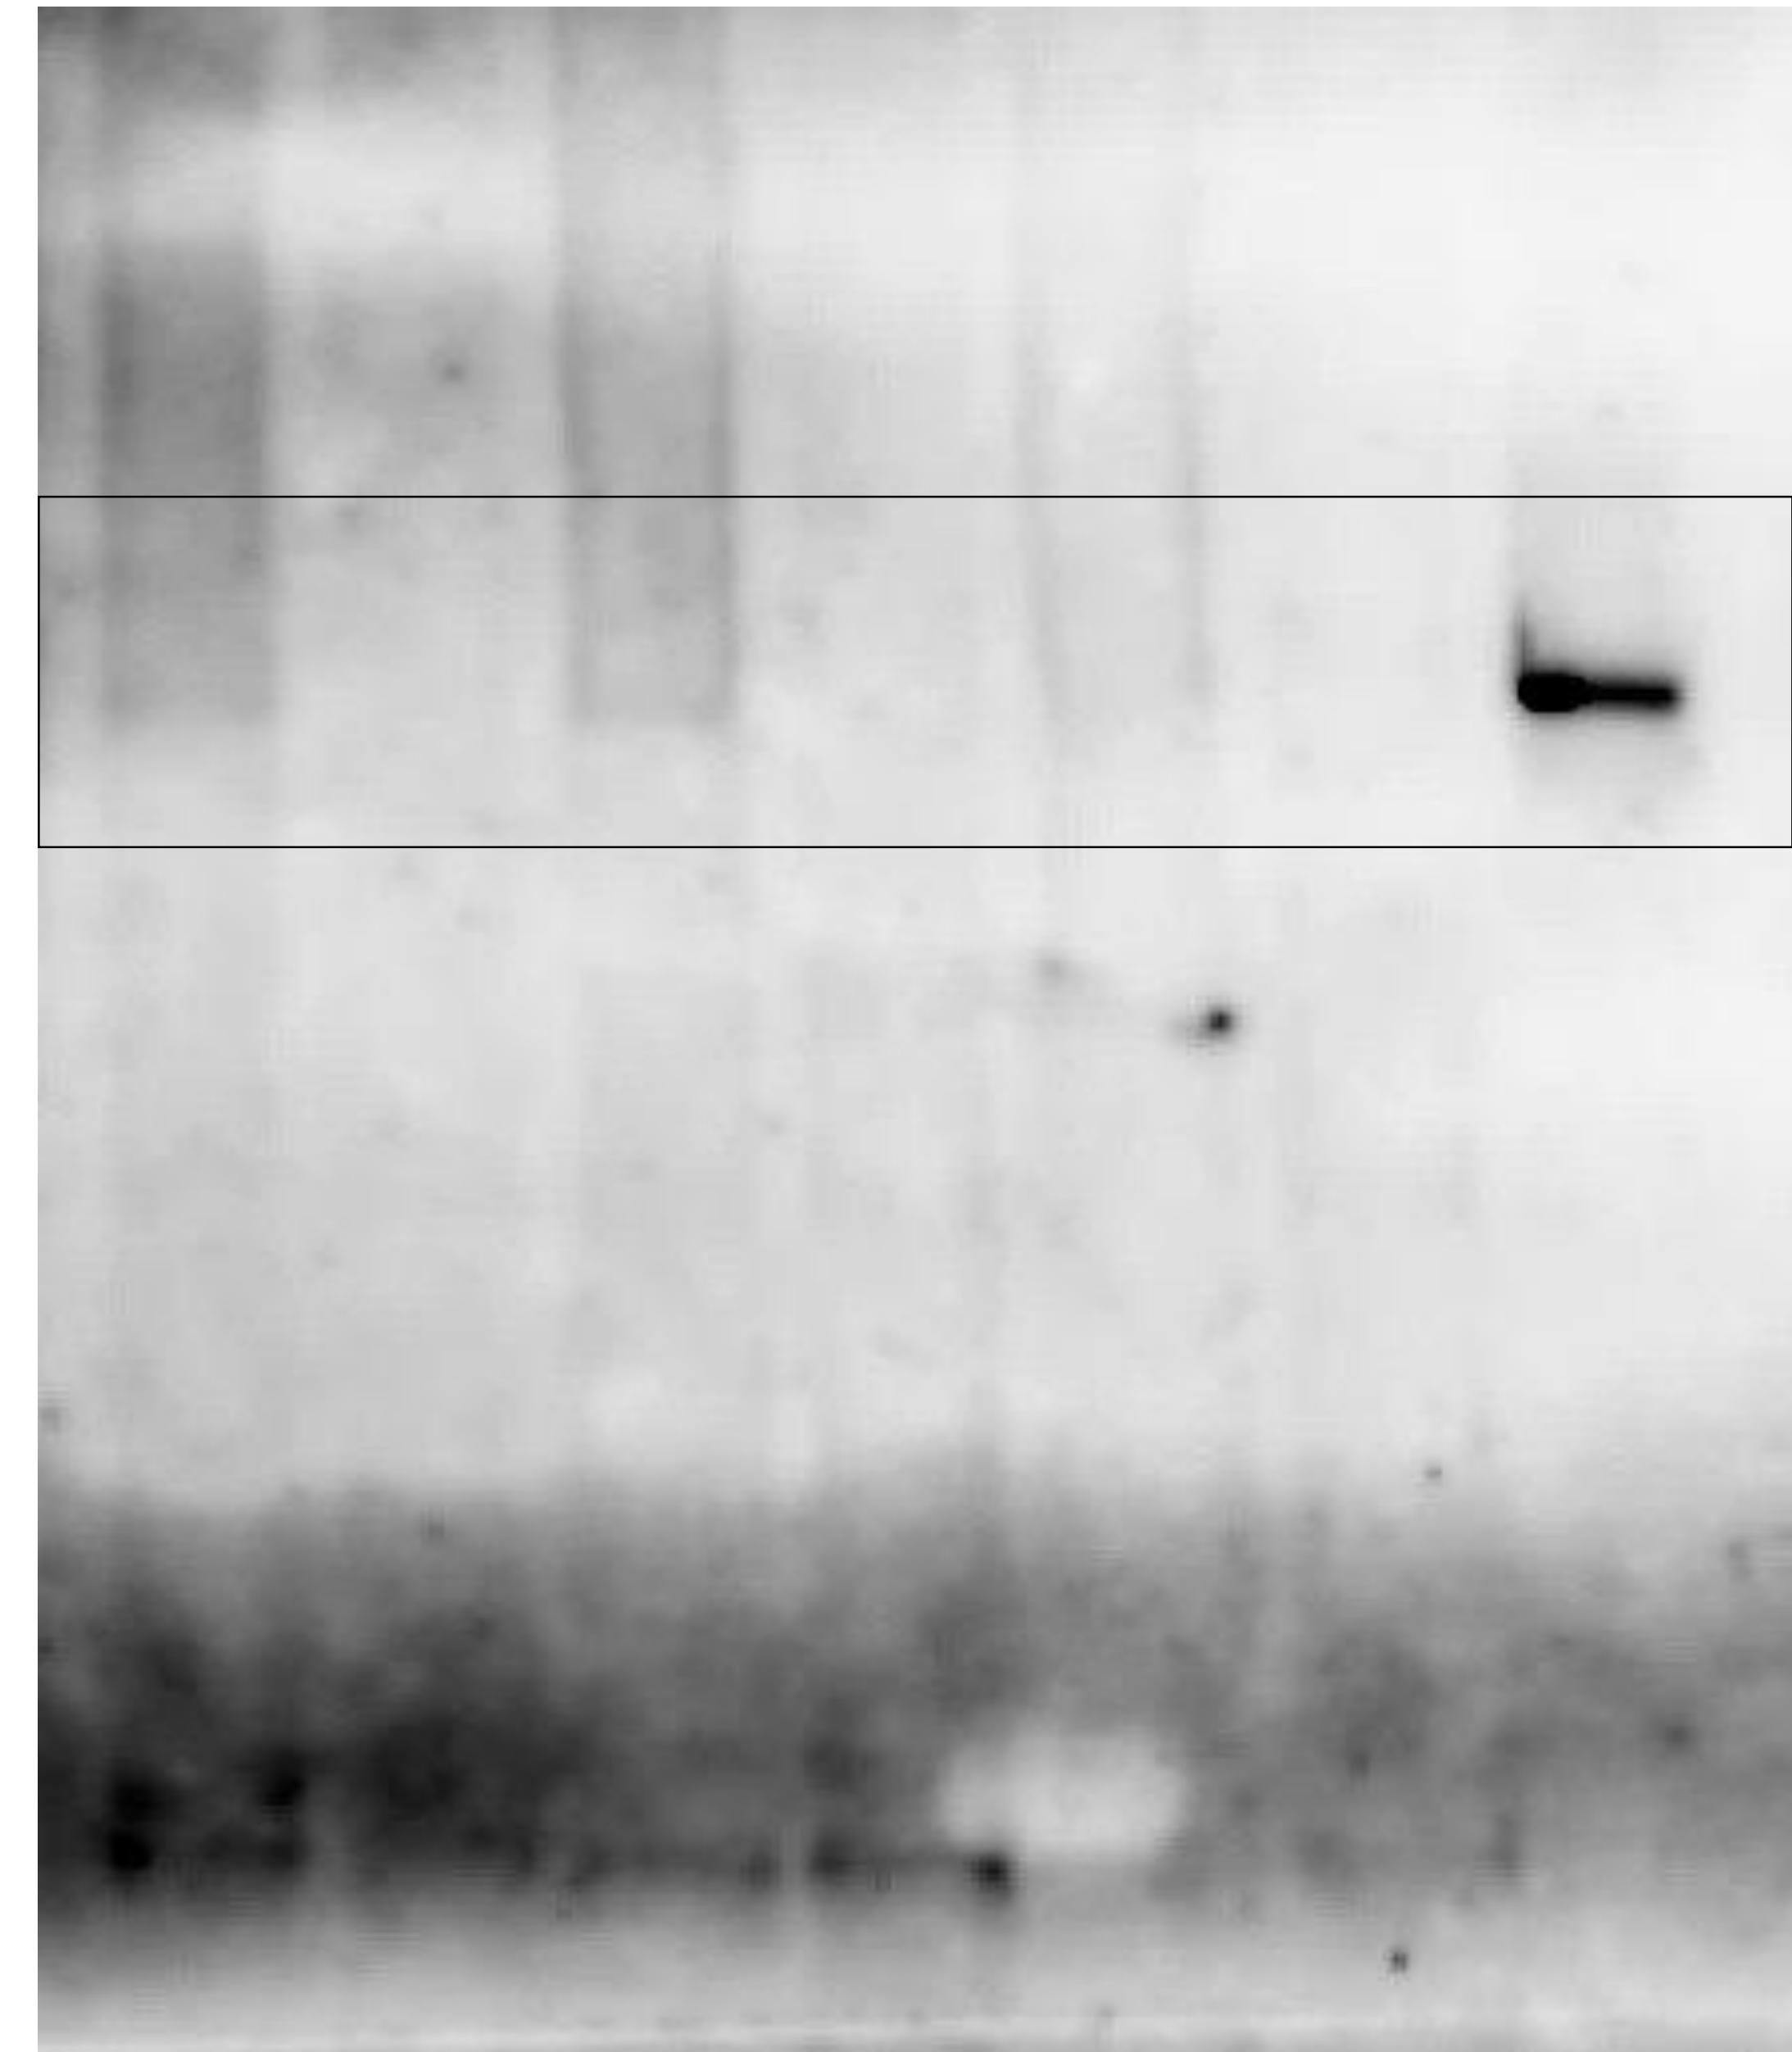

Suppl Figure 13b

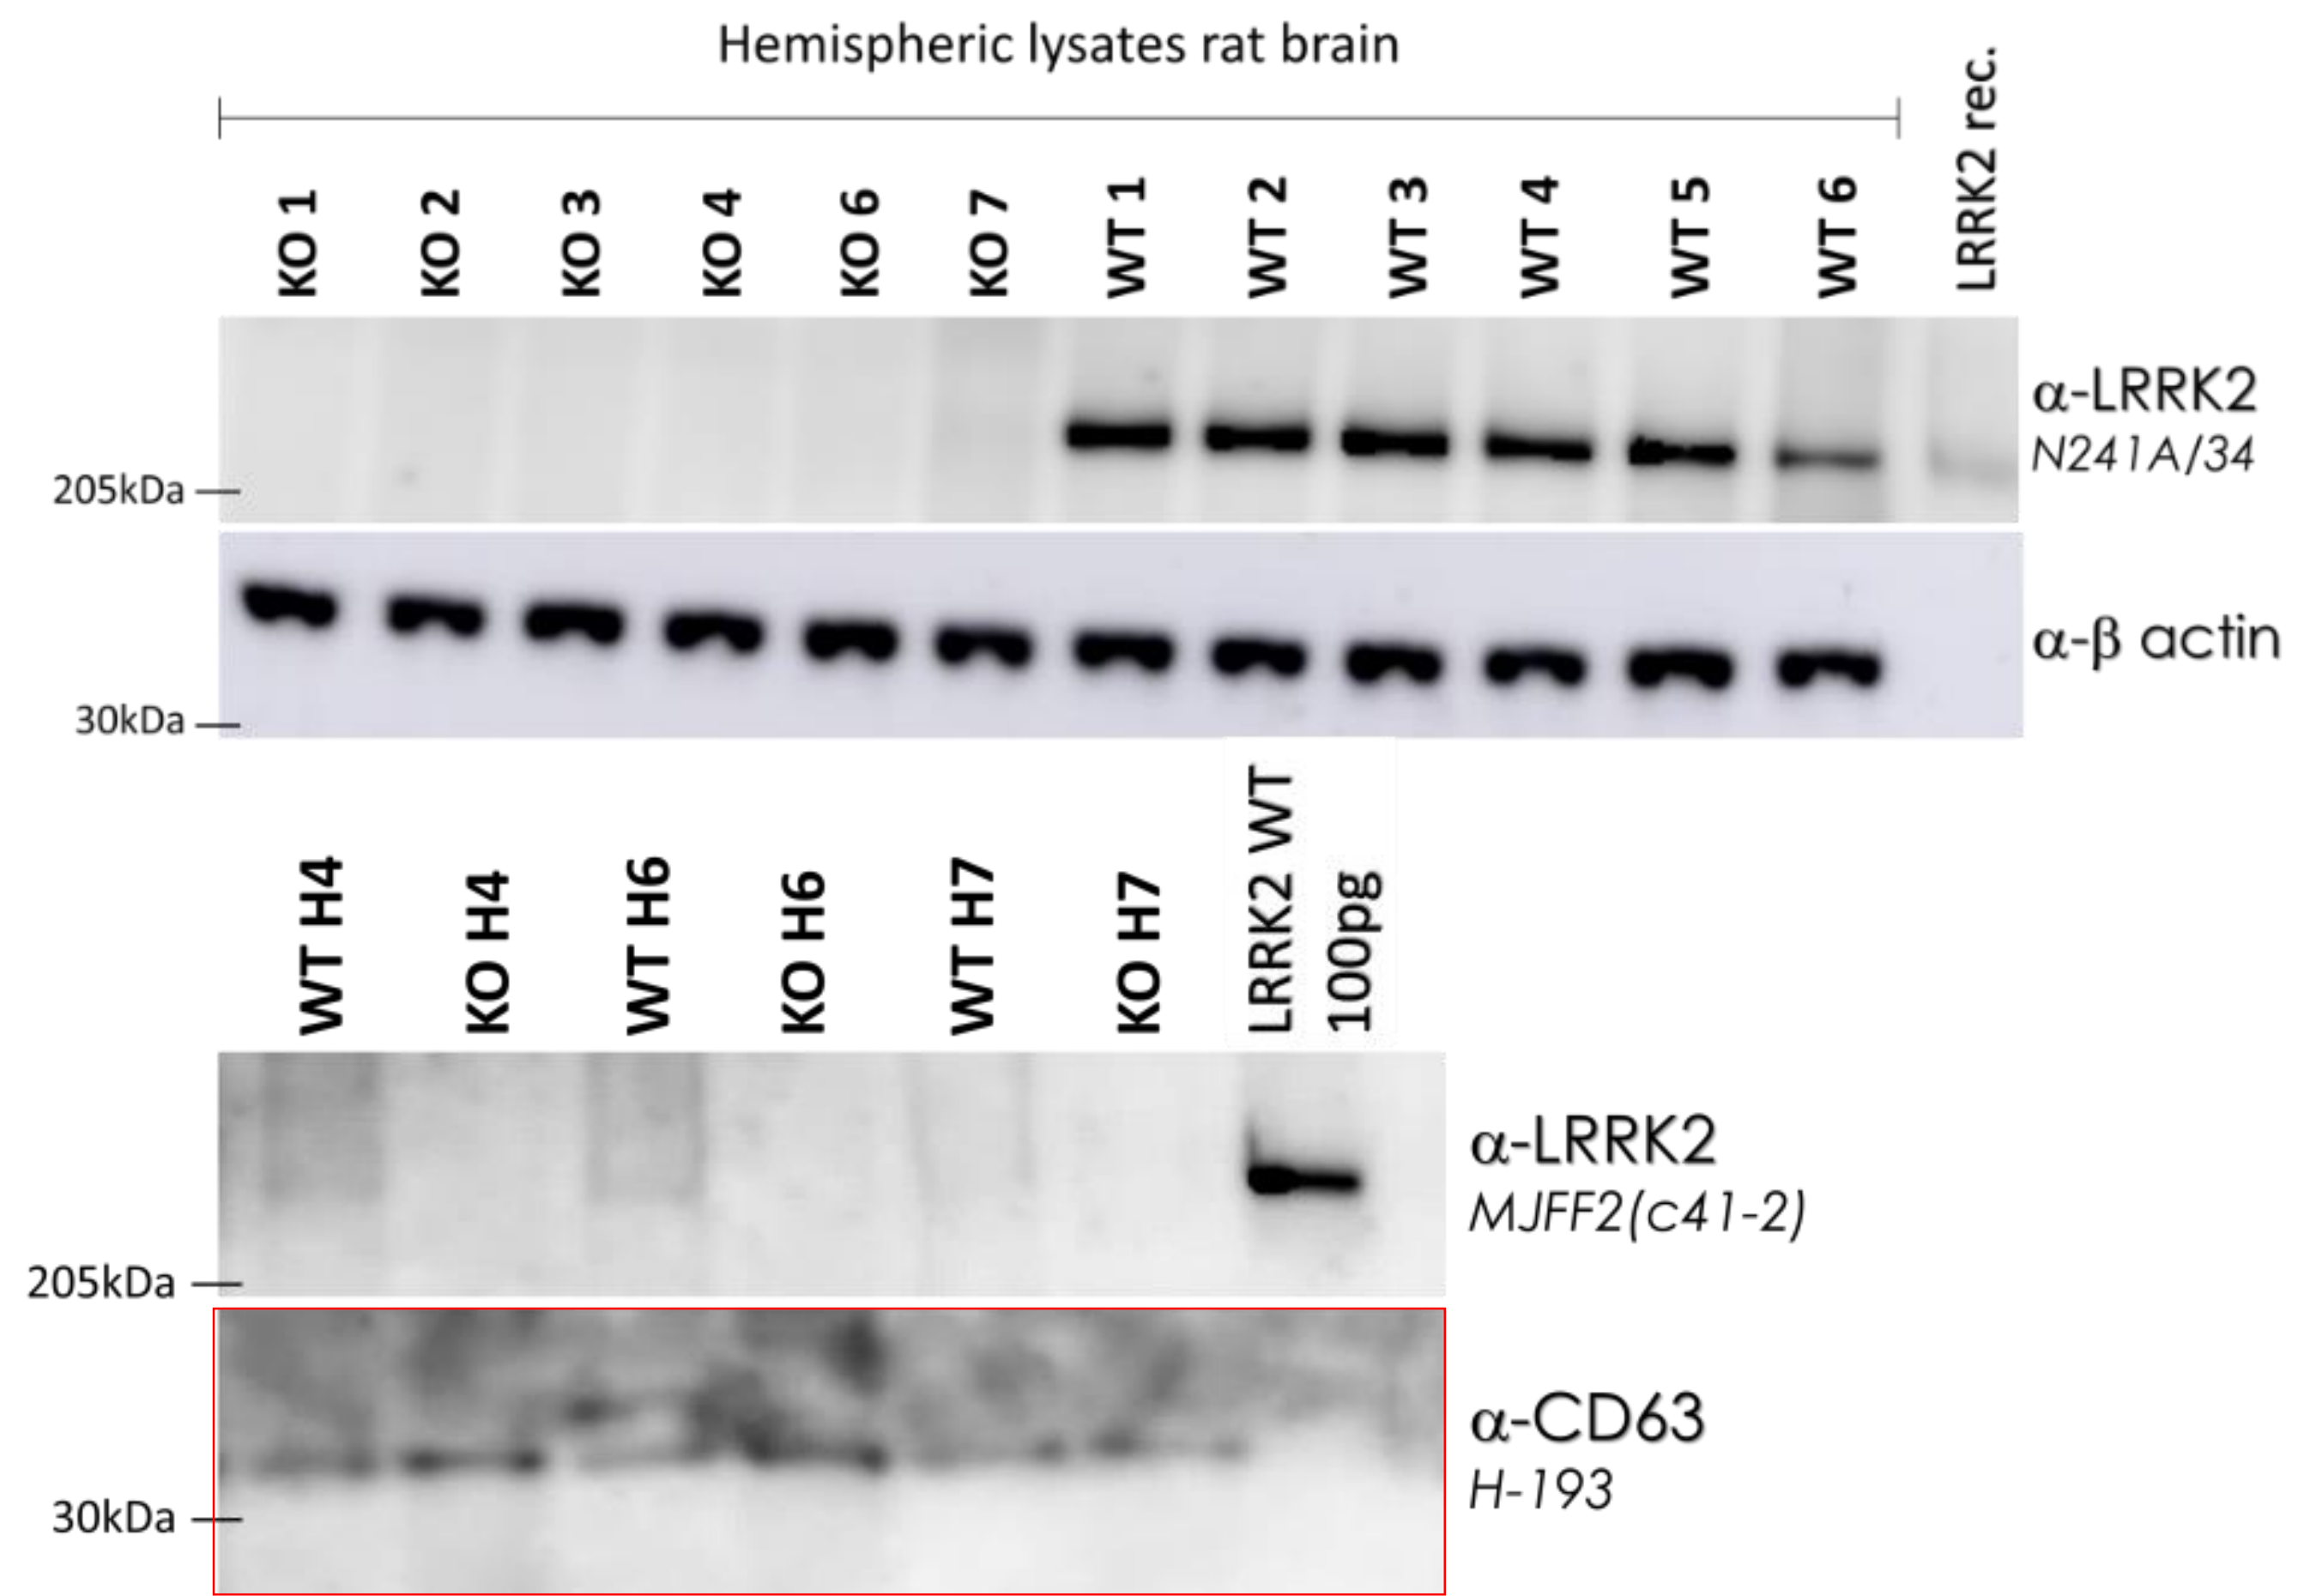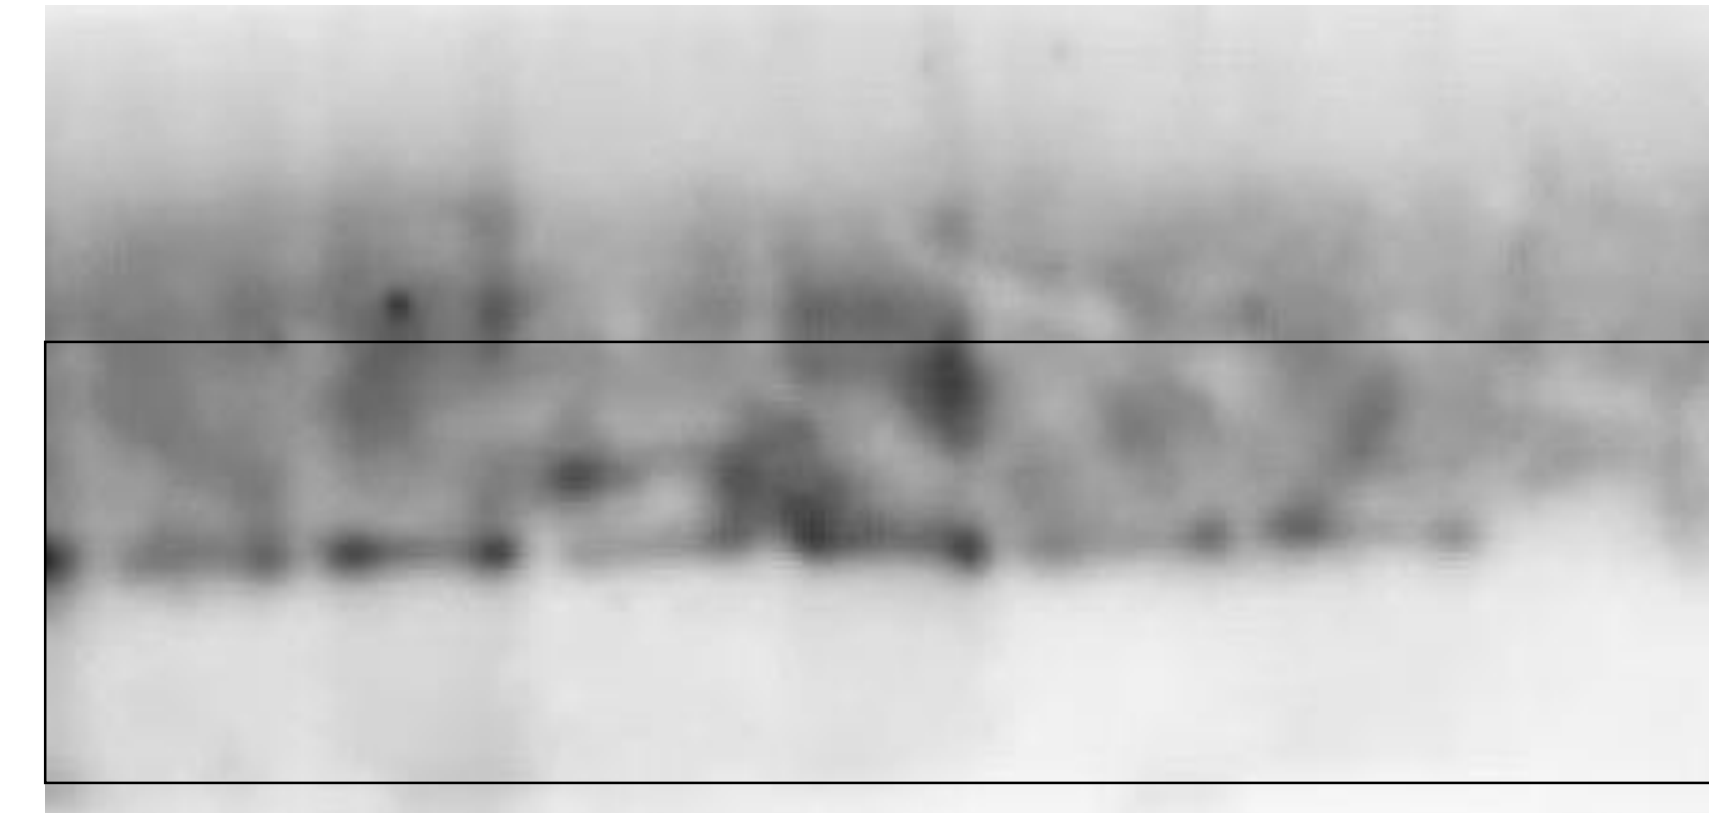

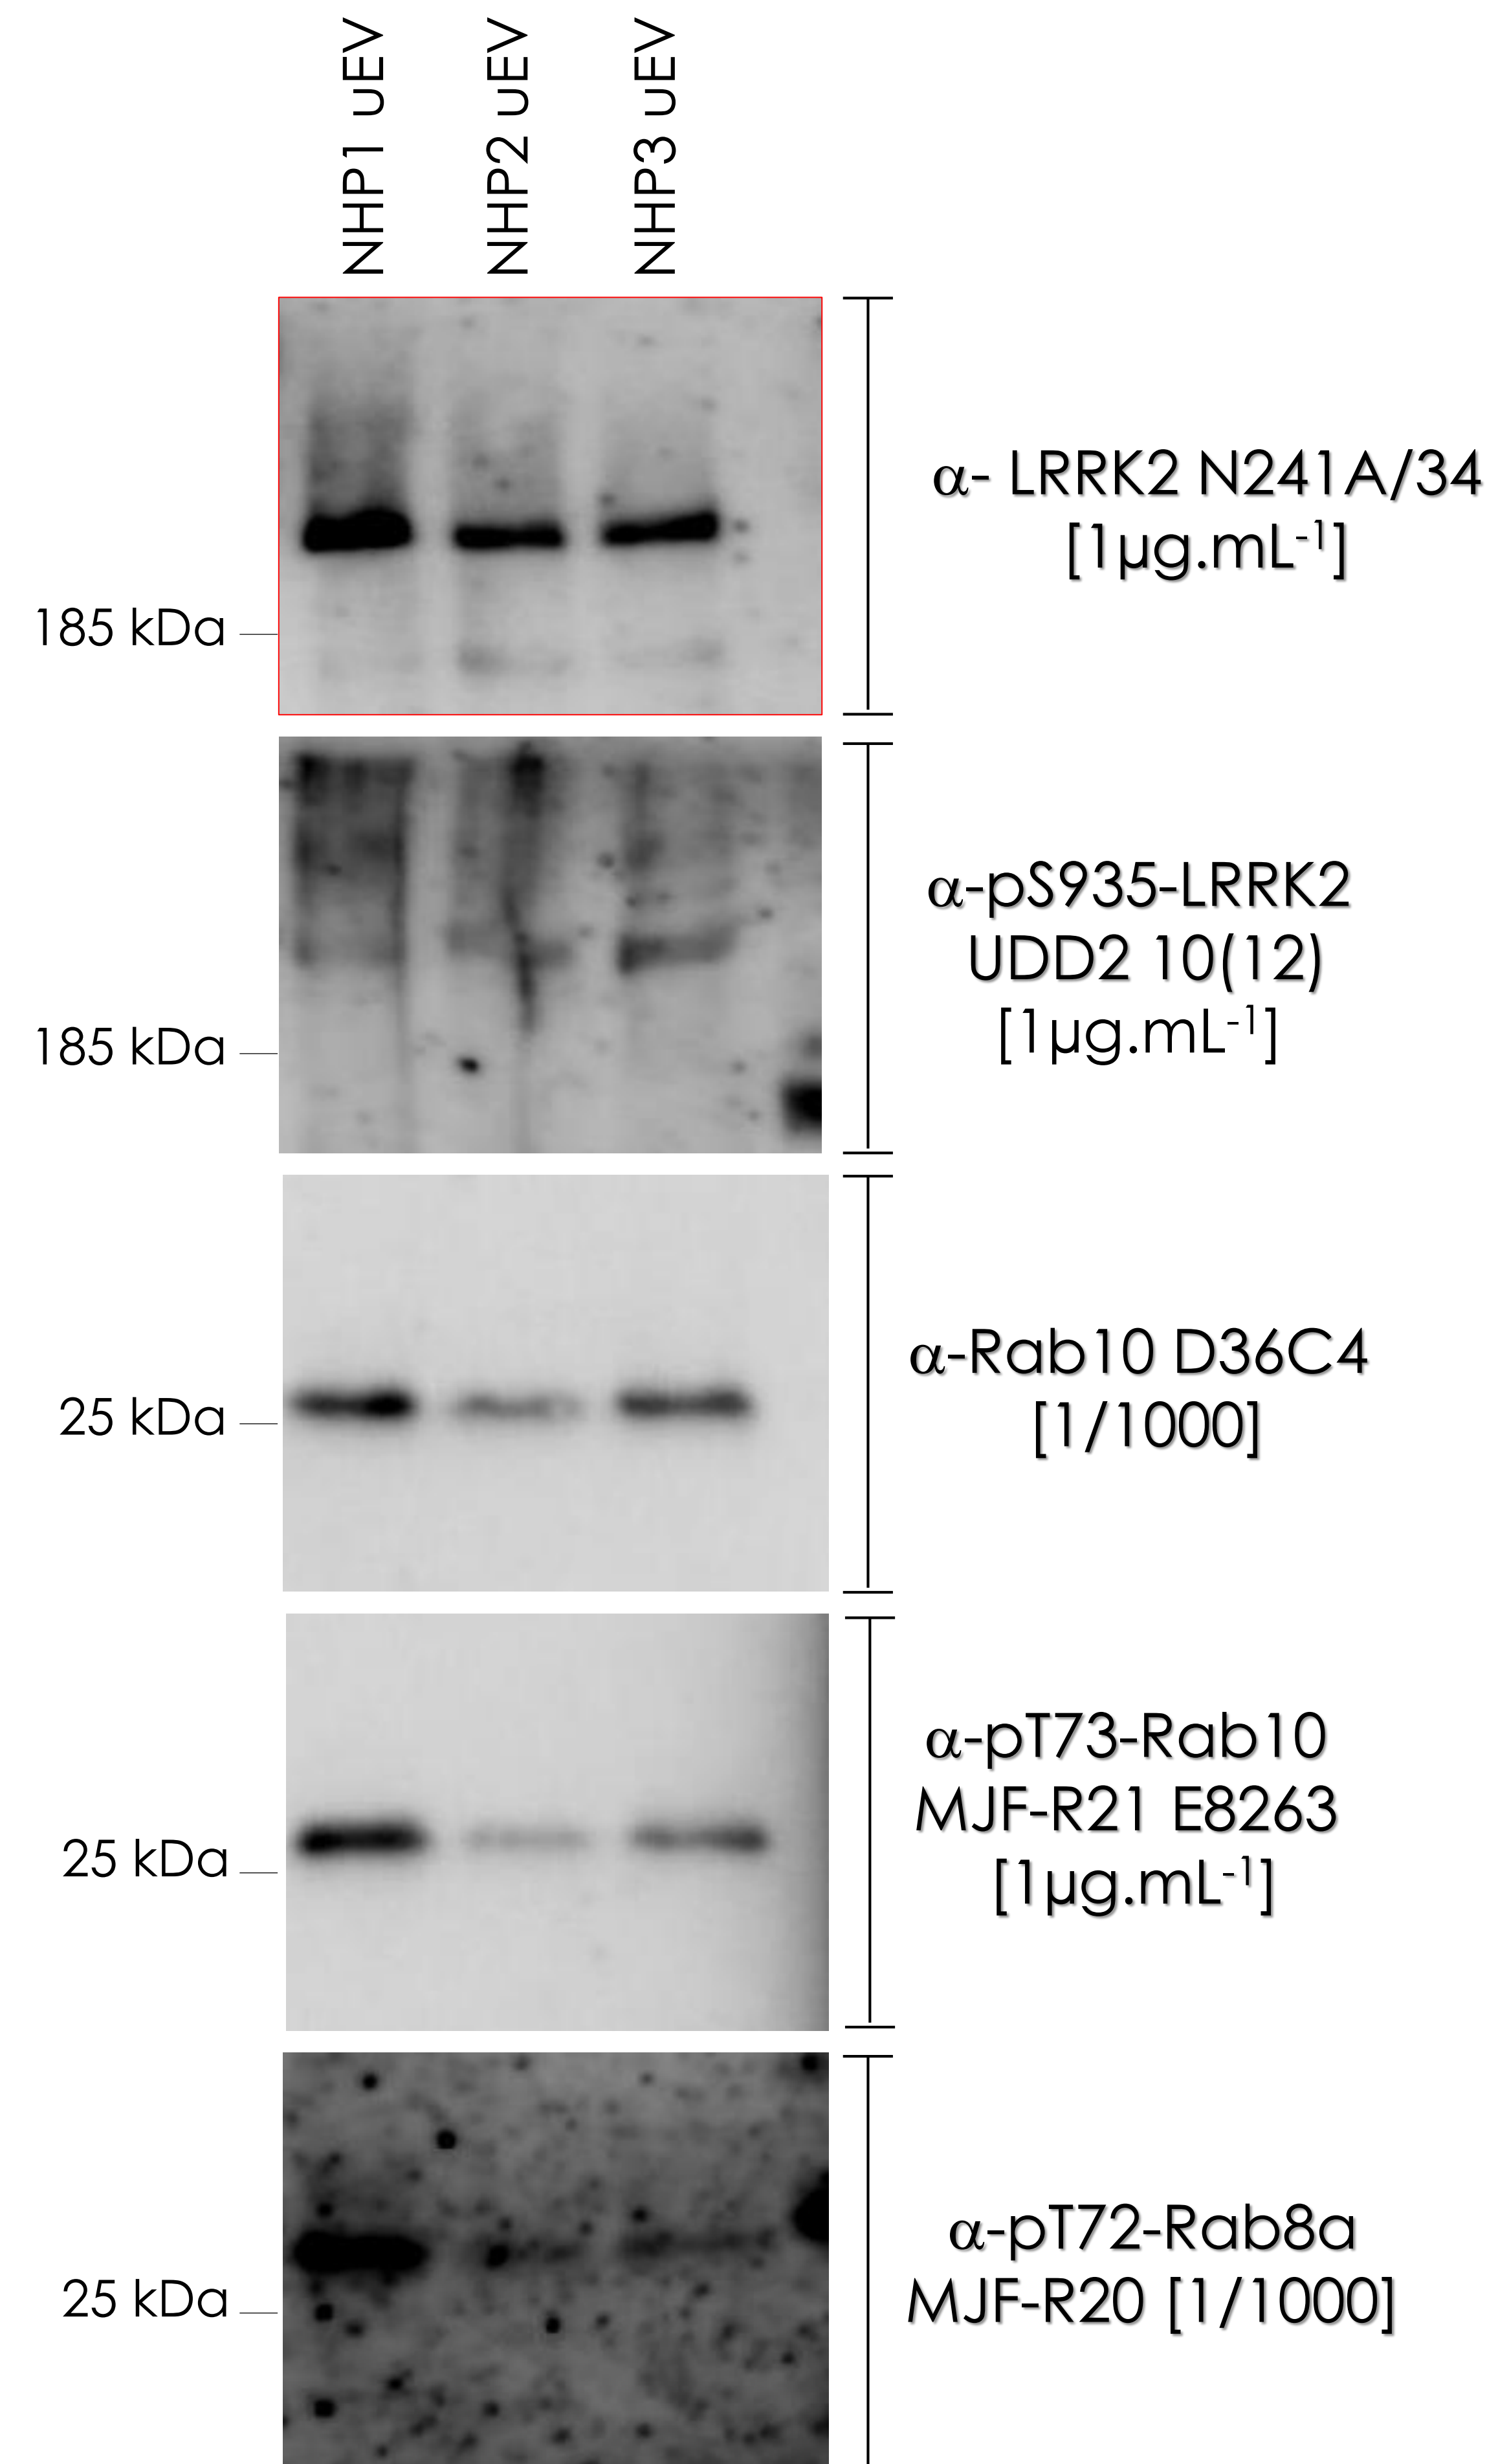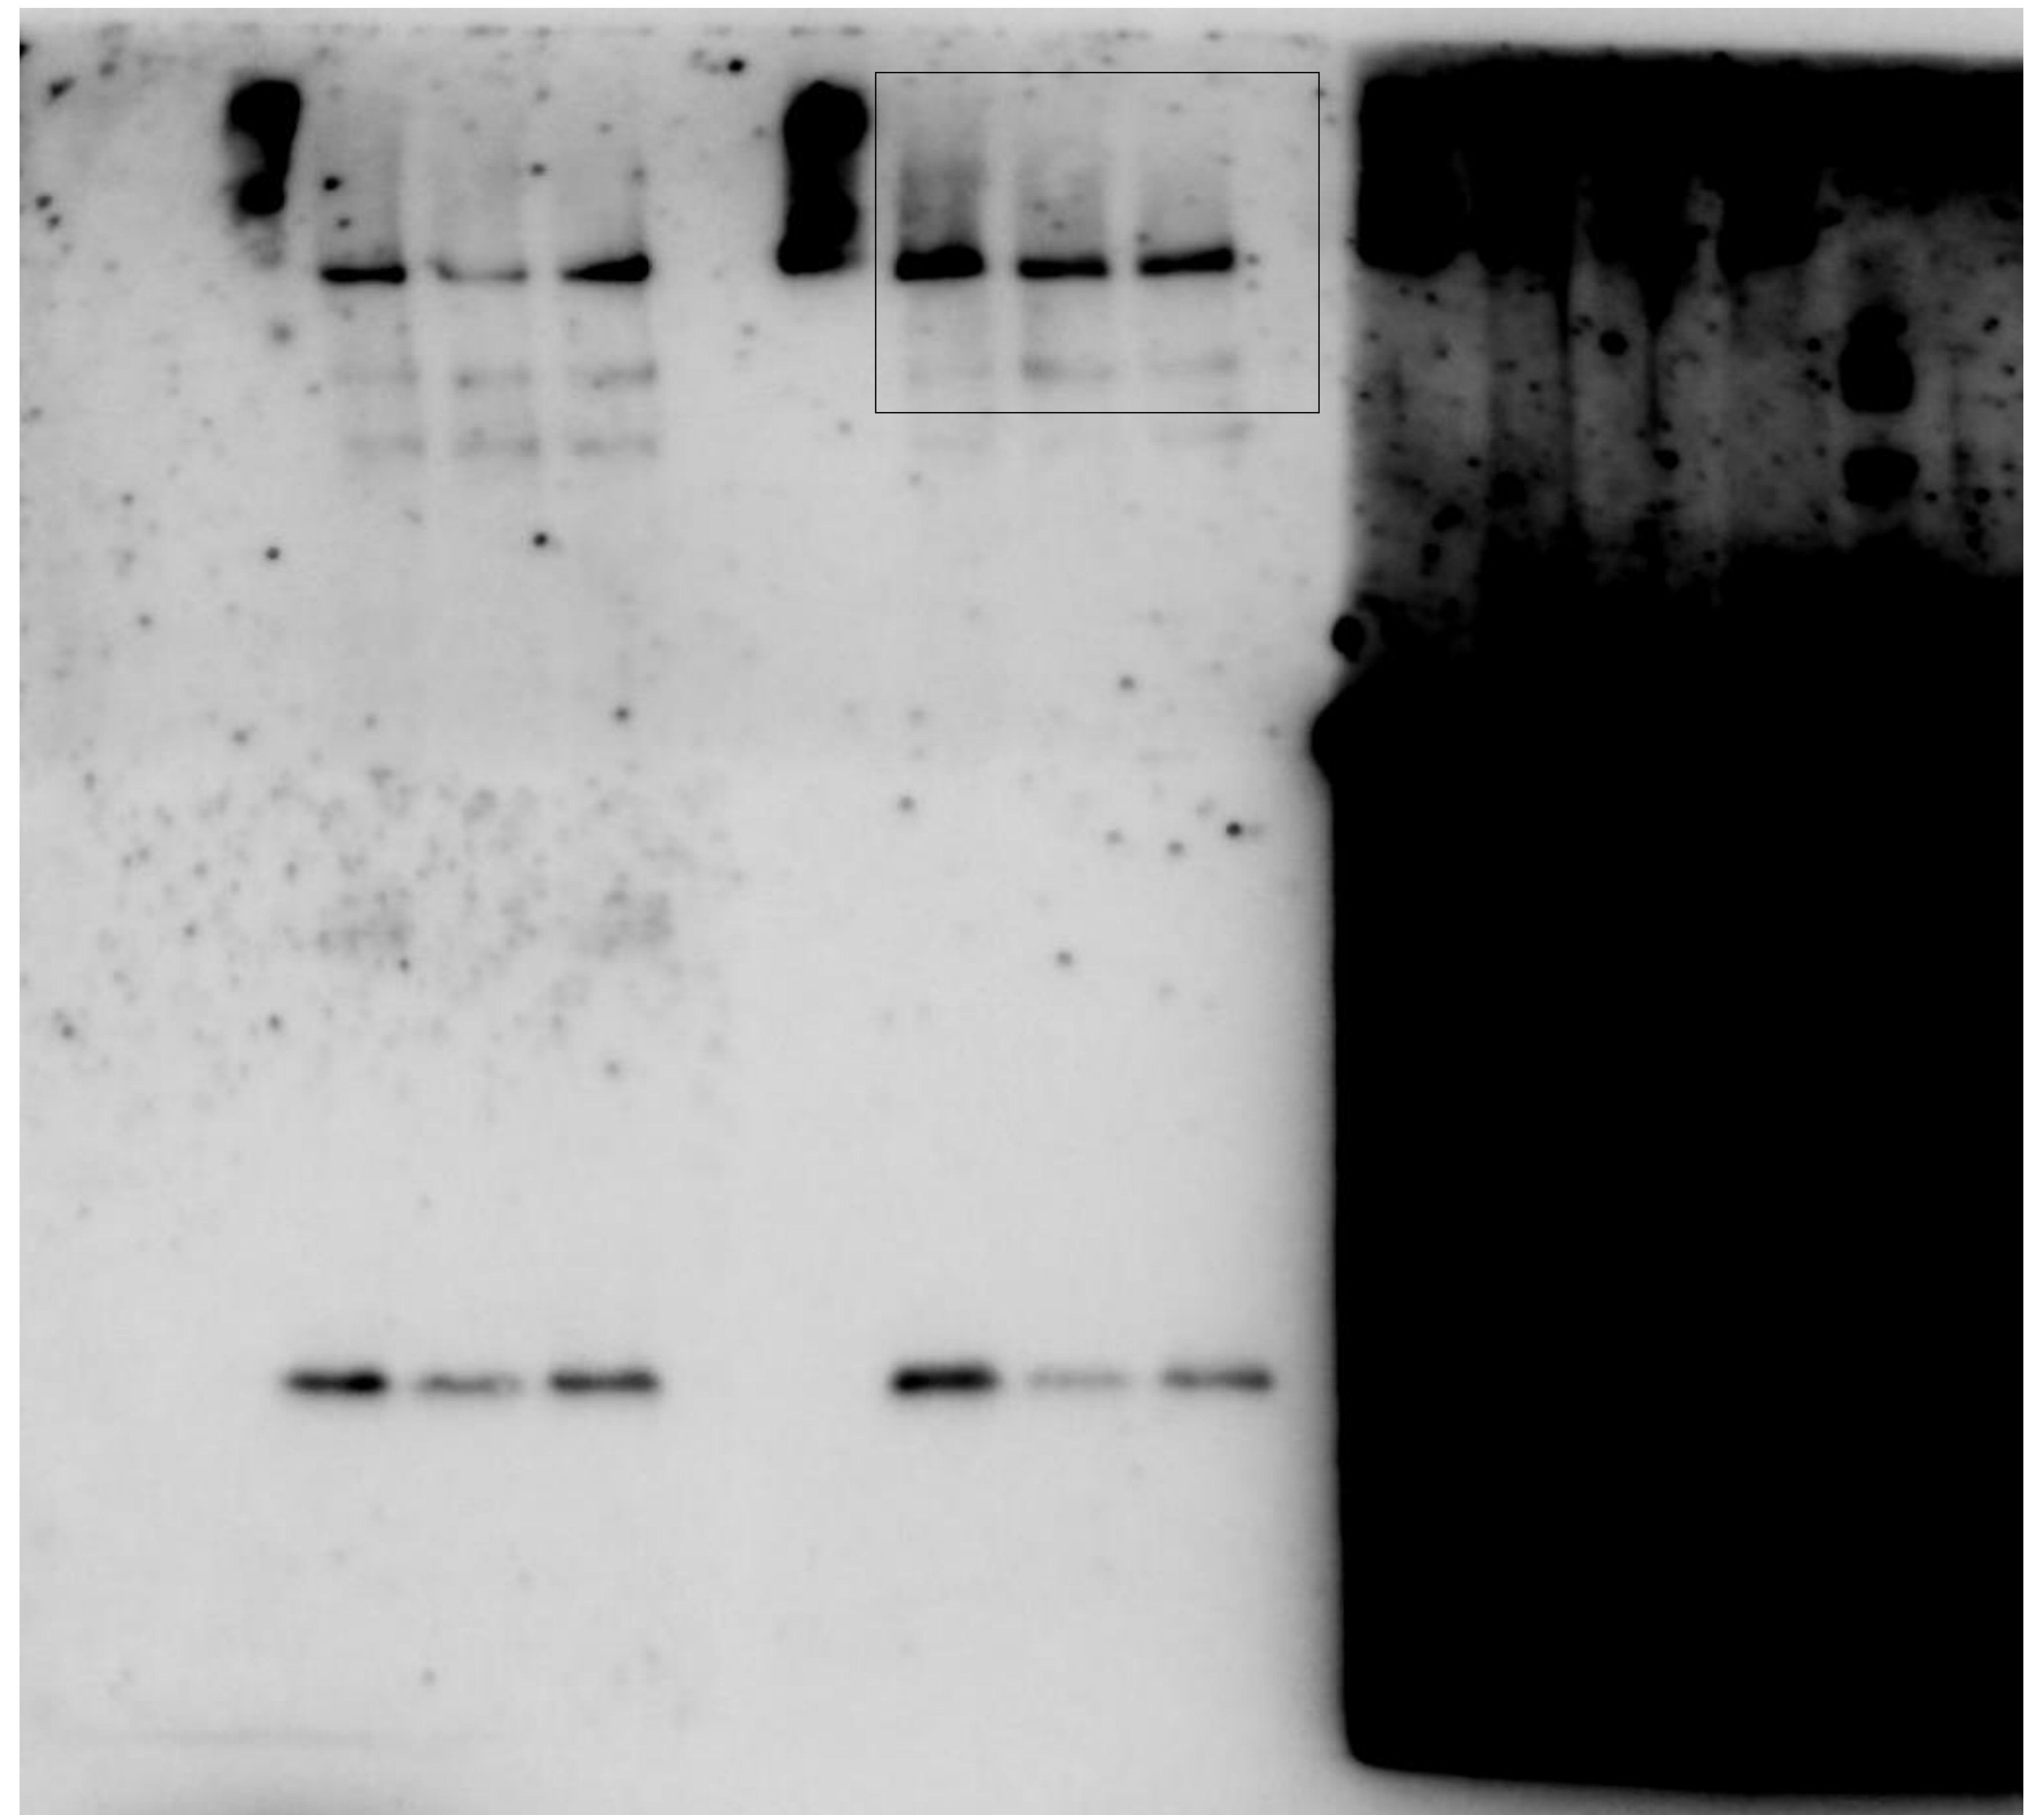



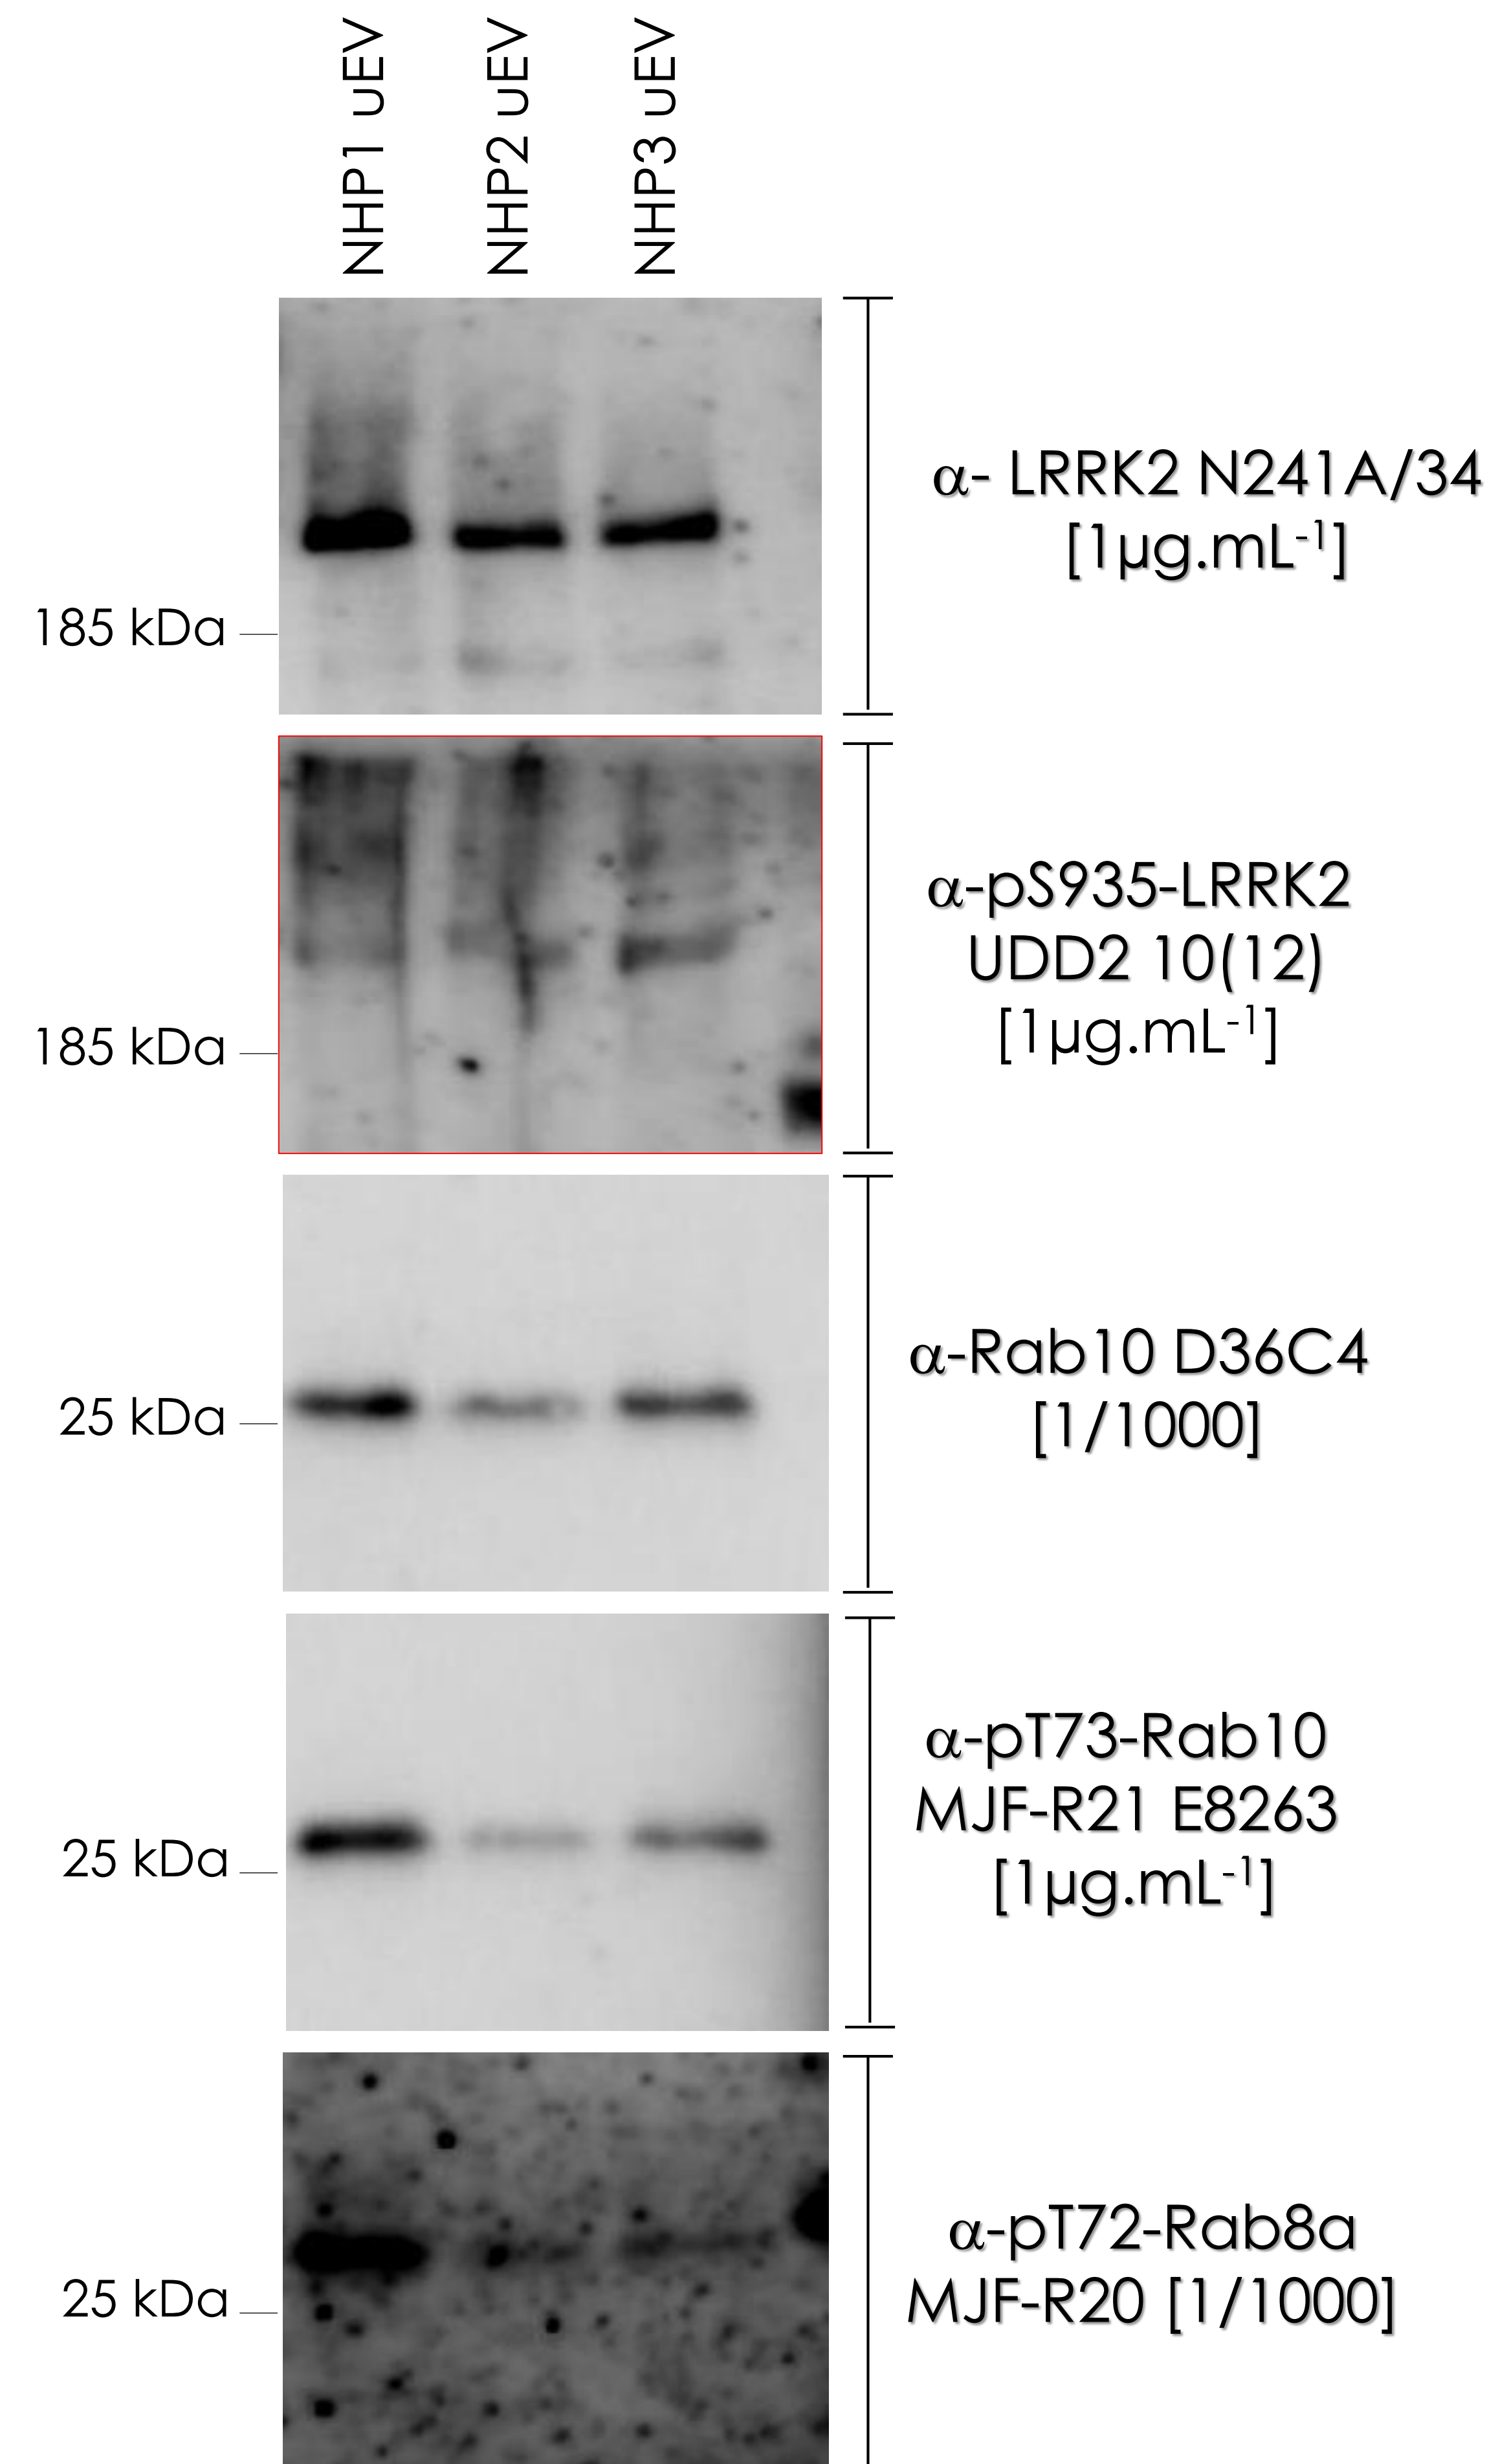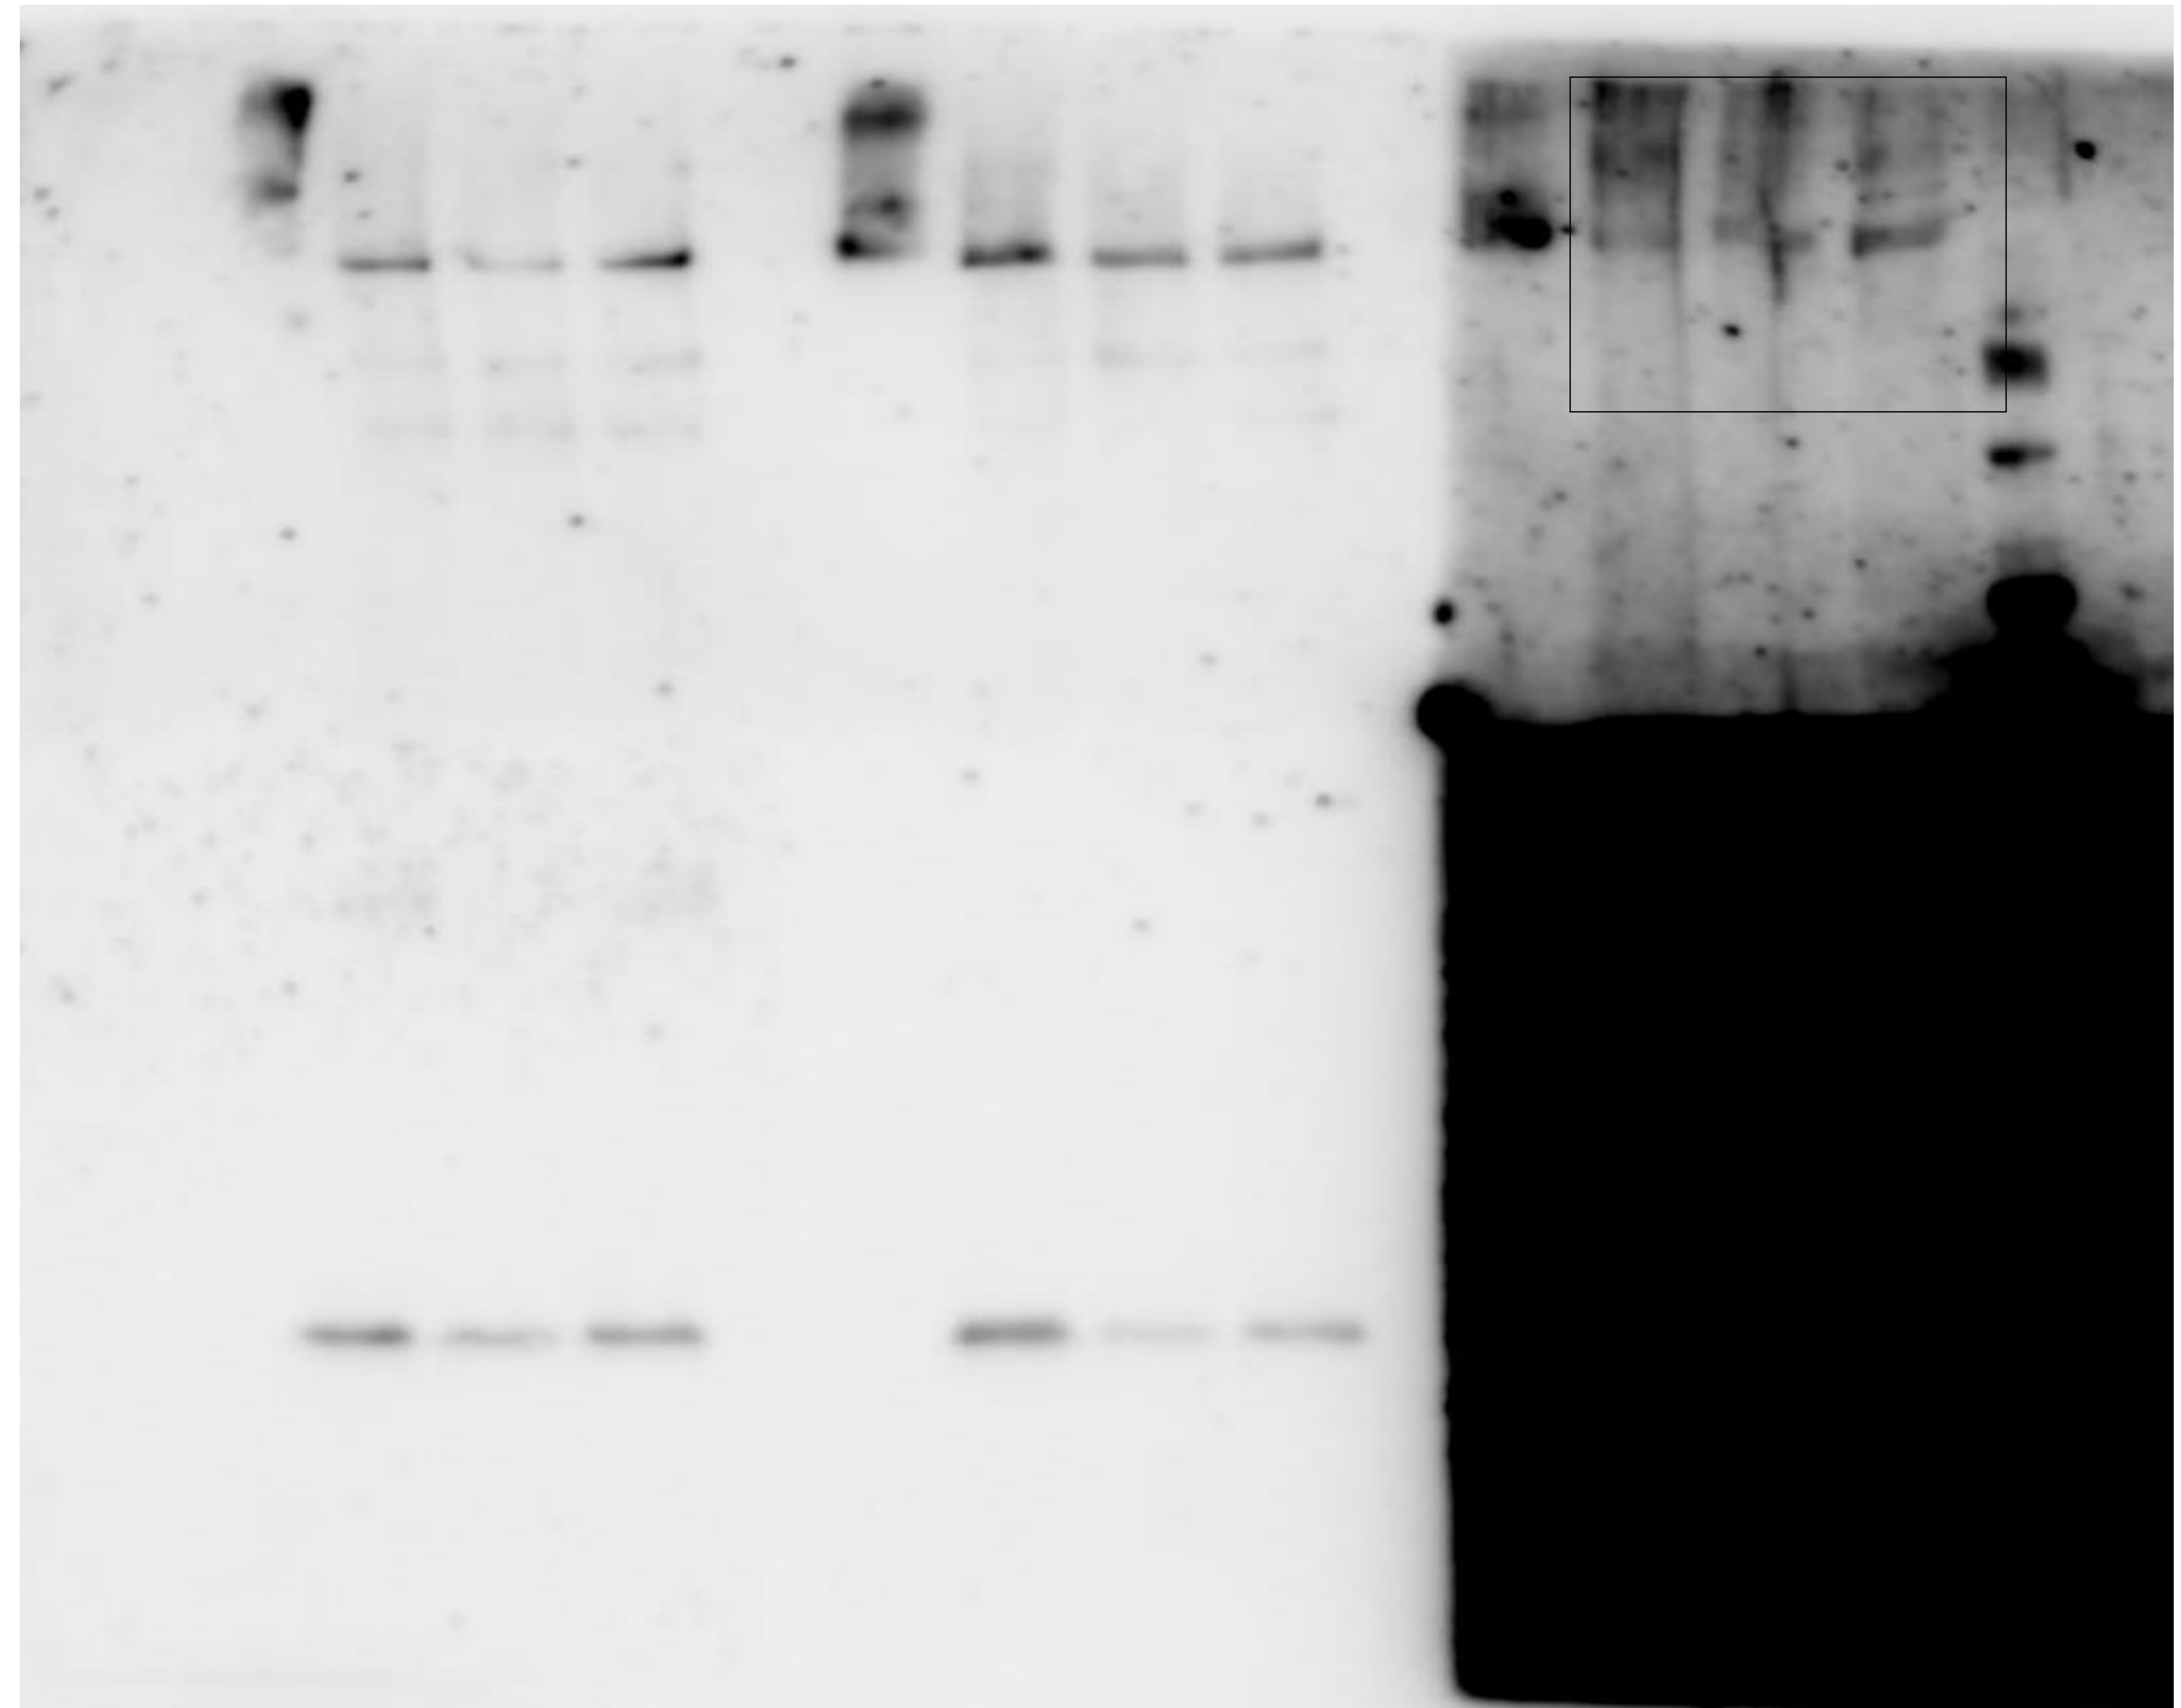

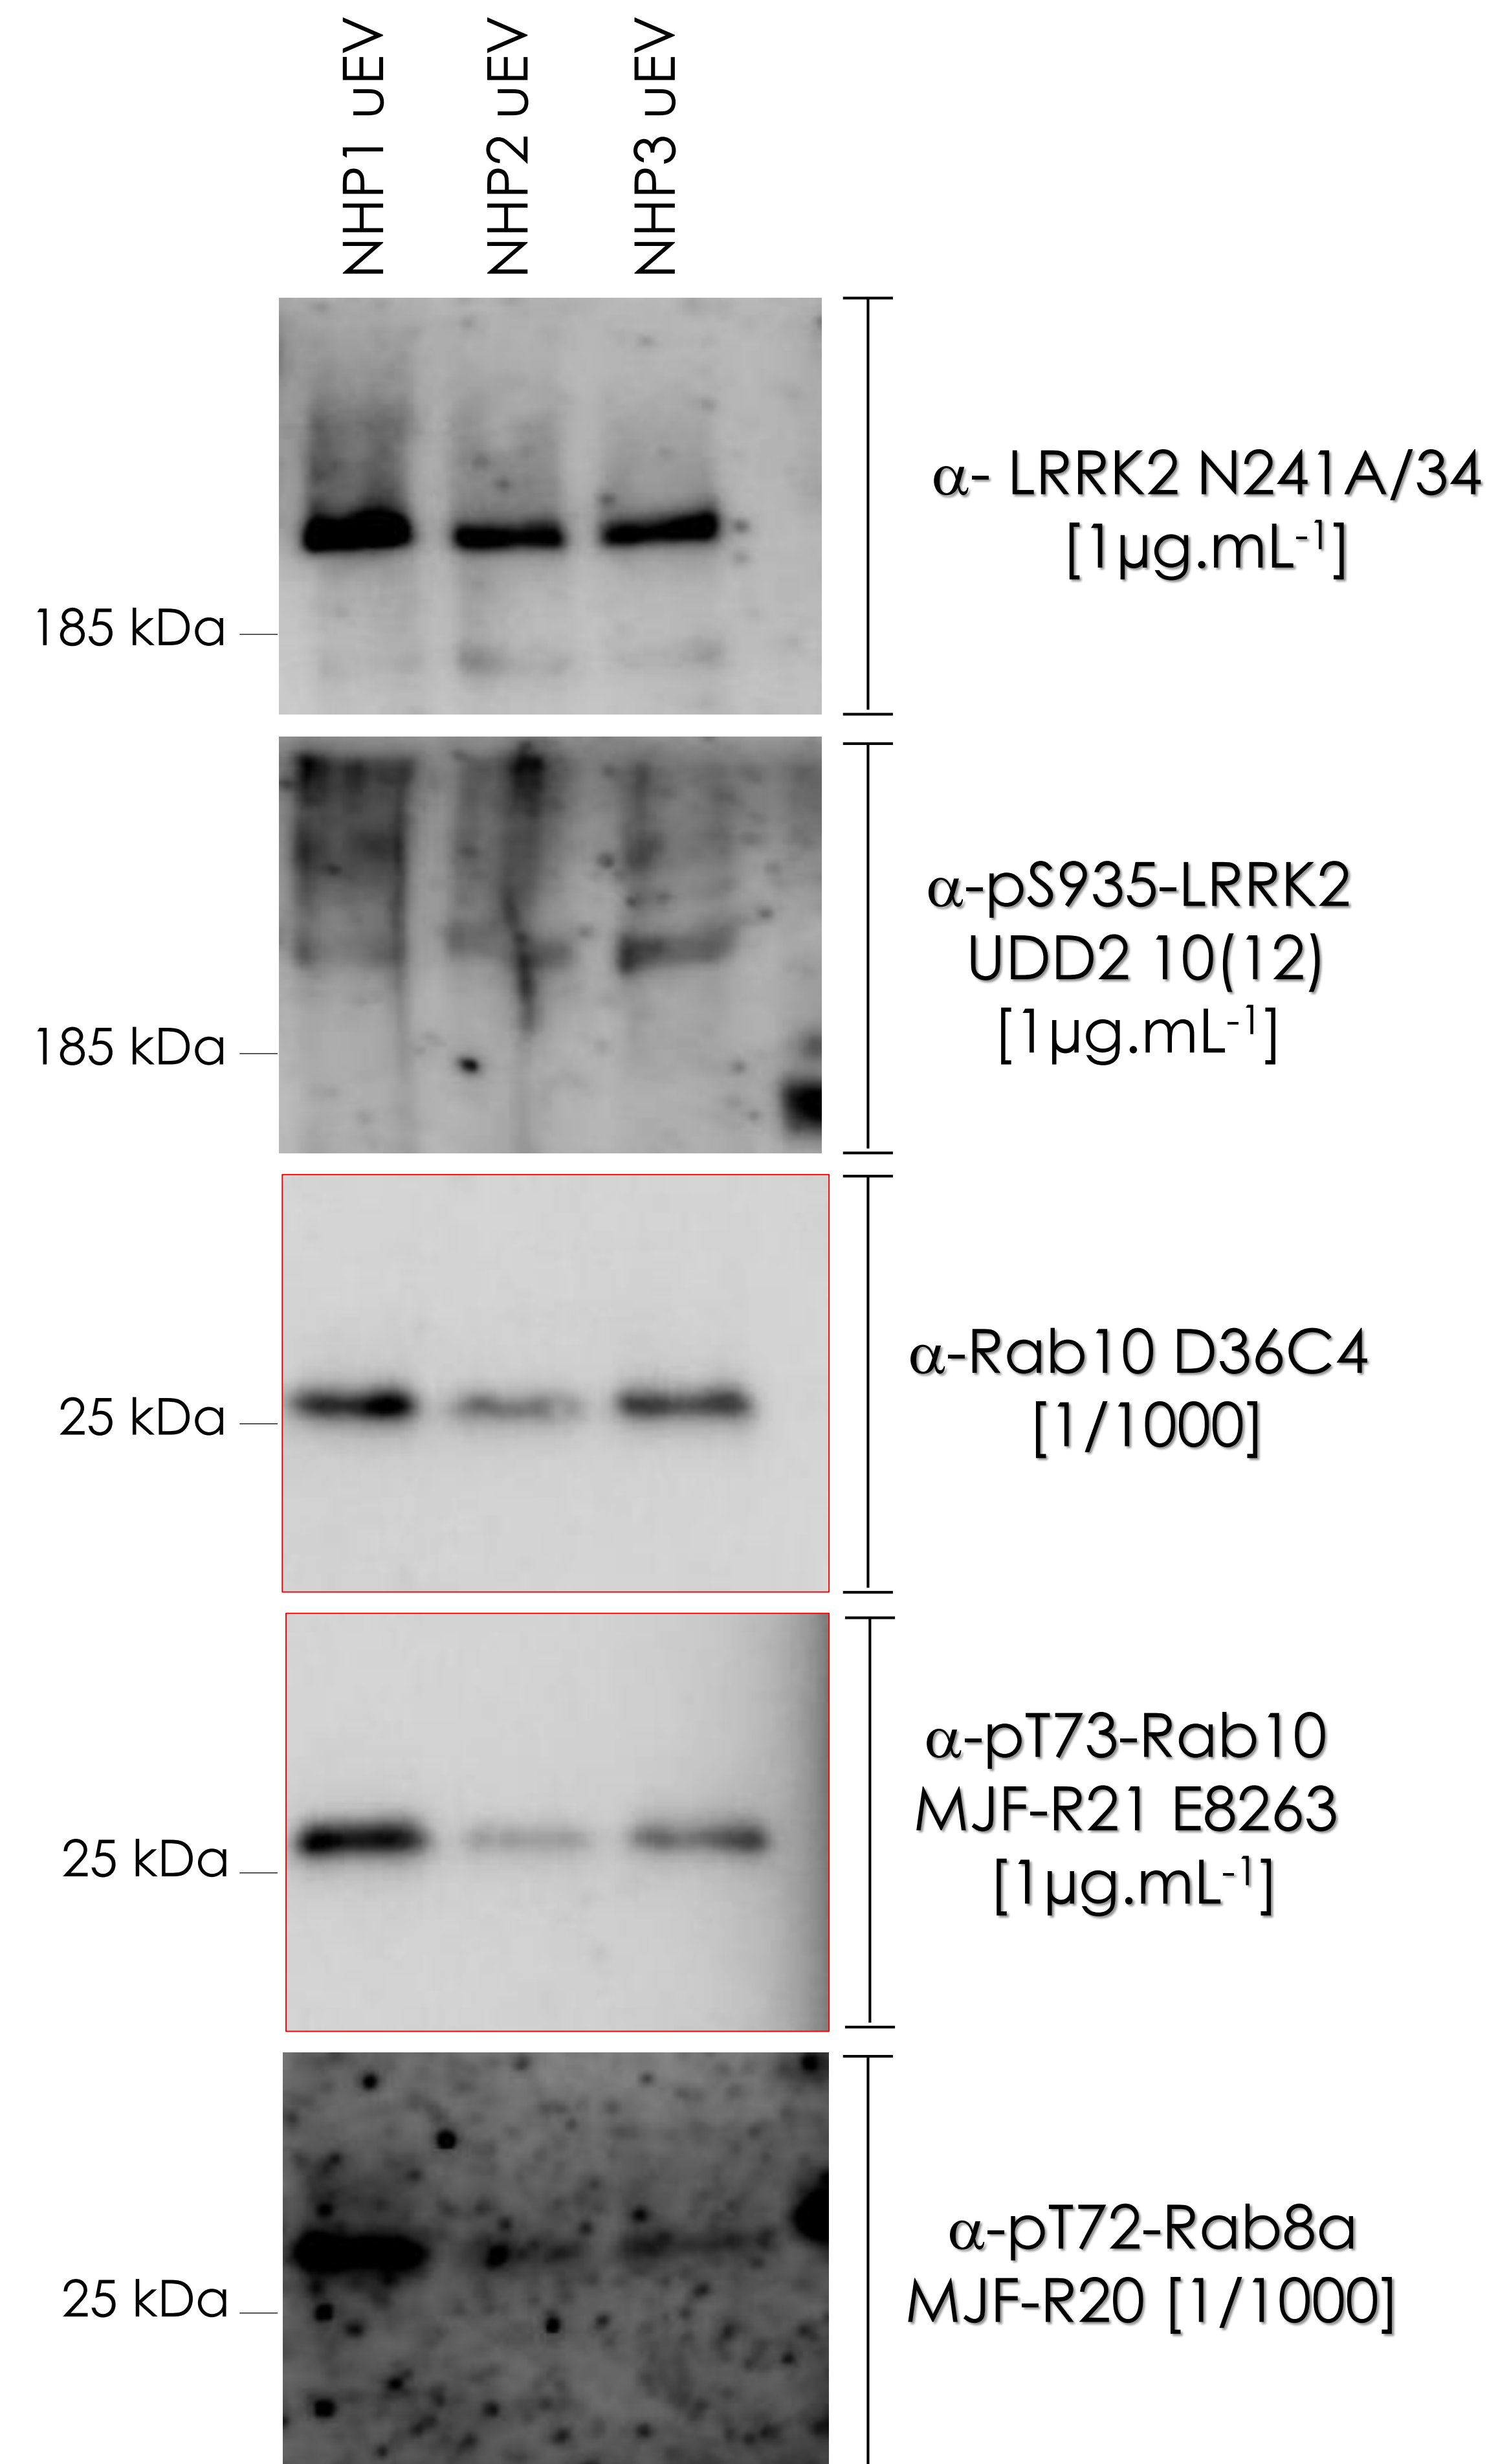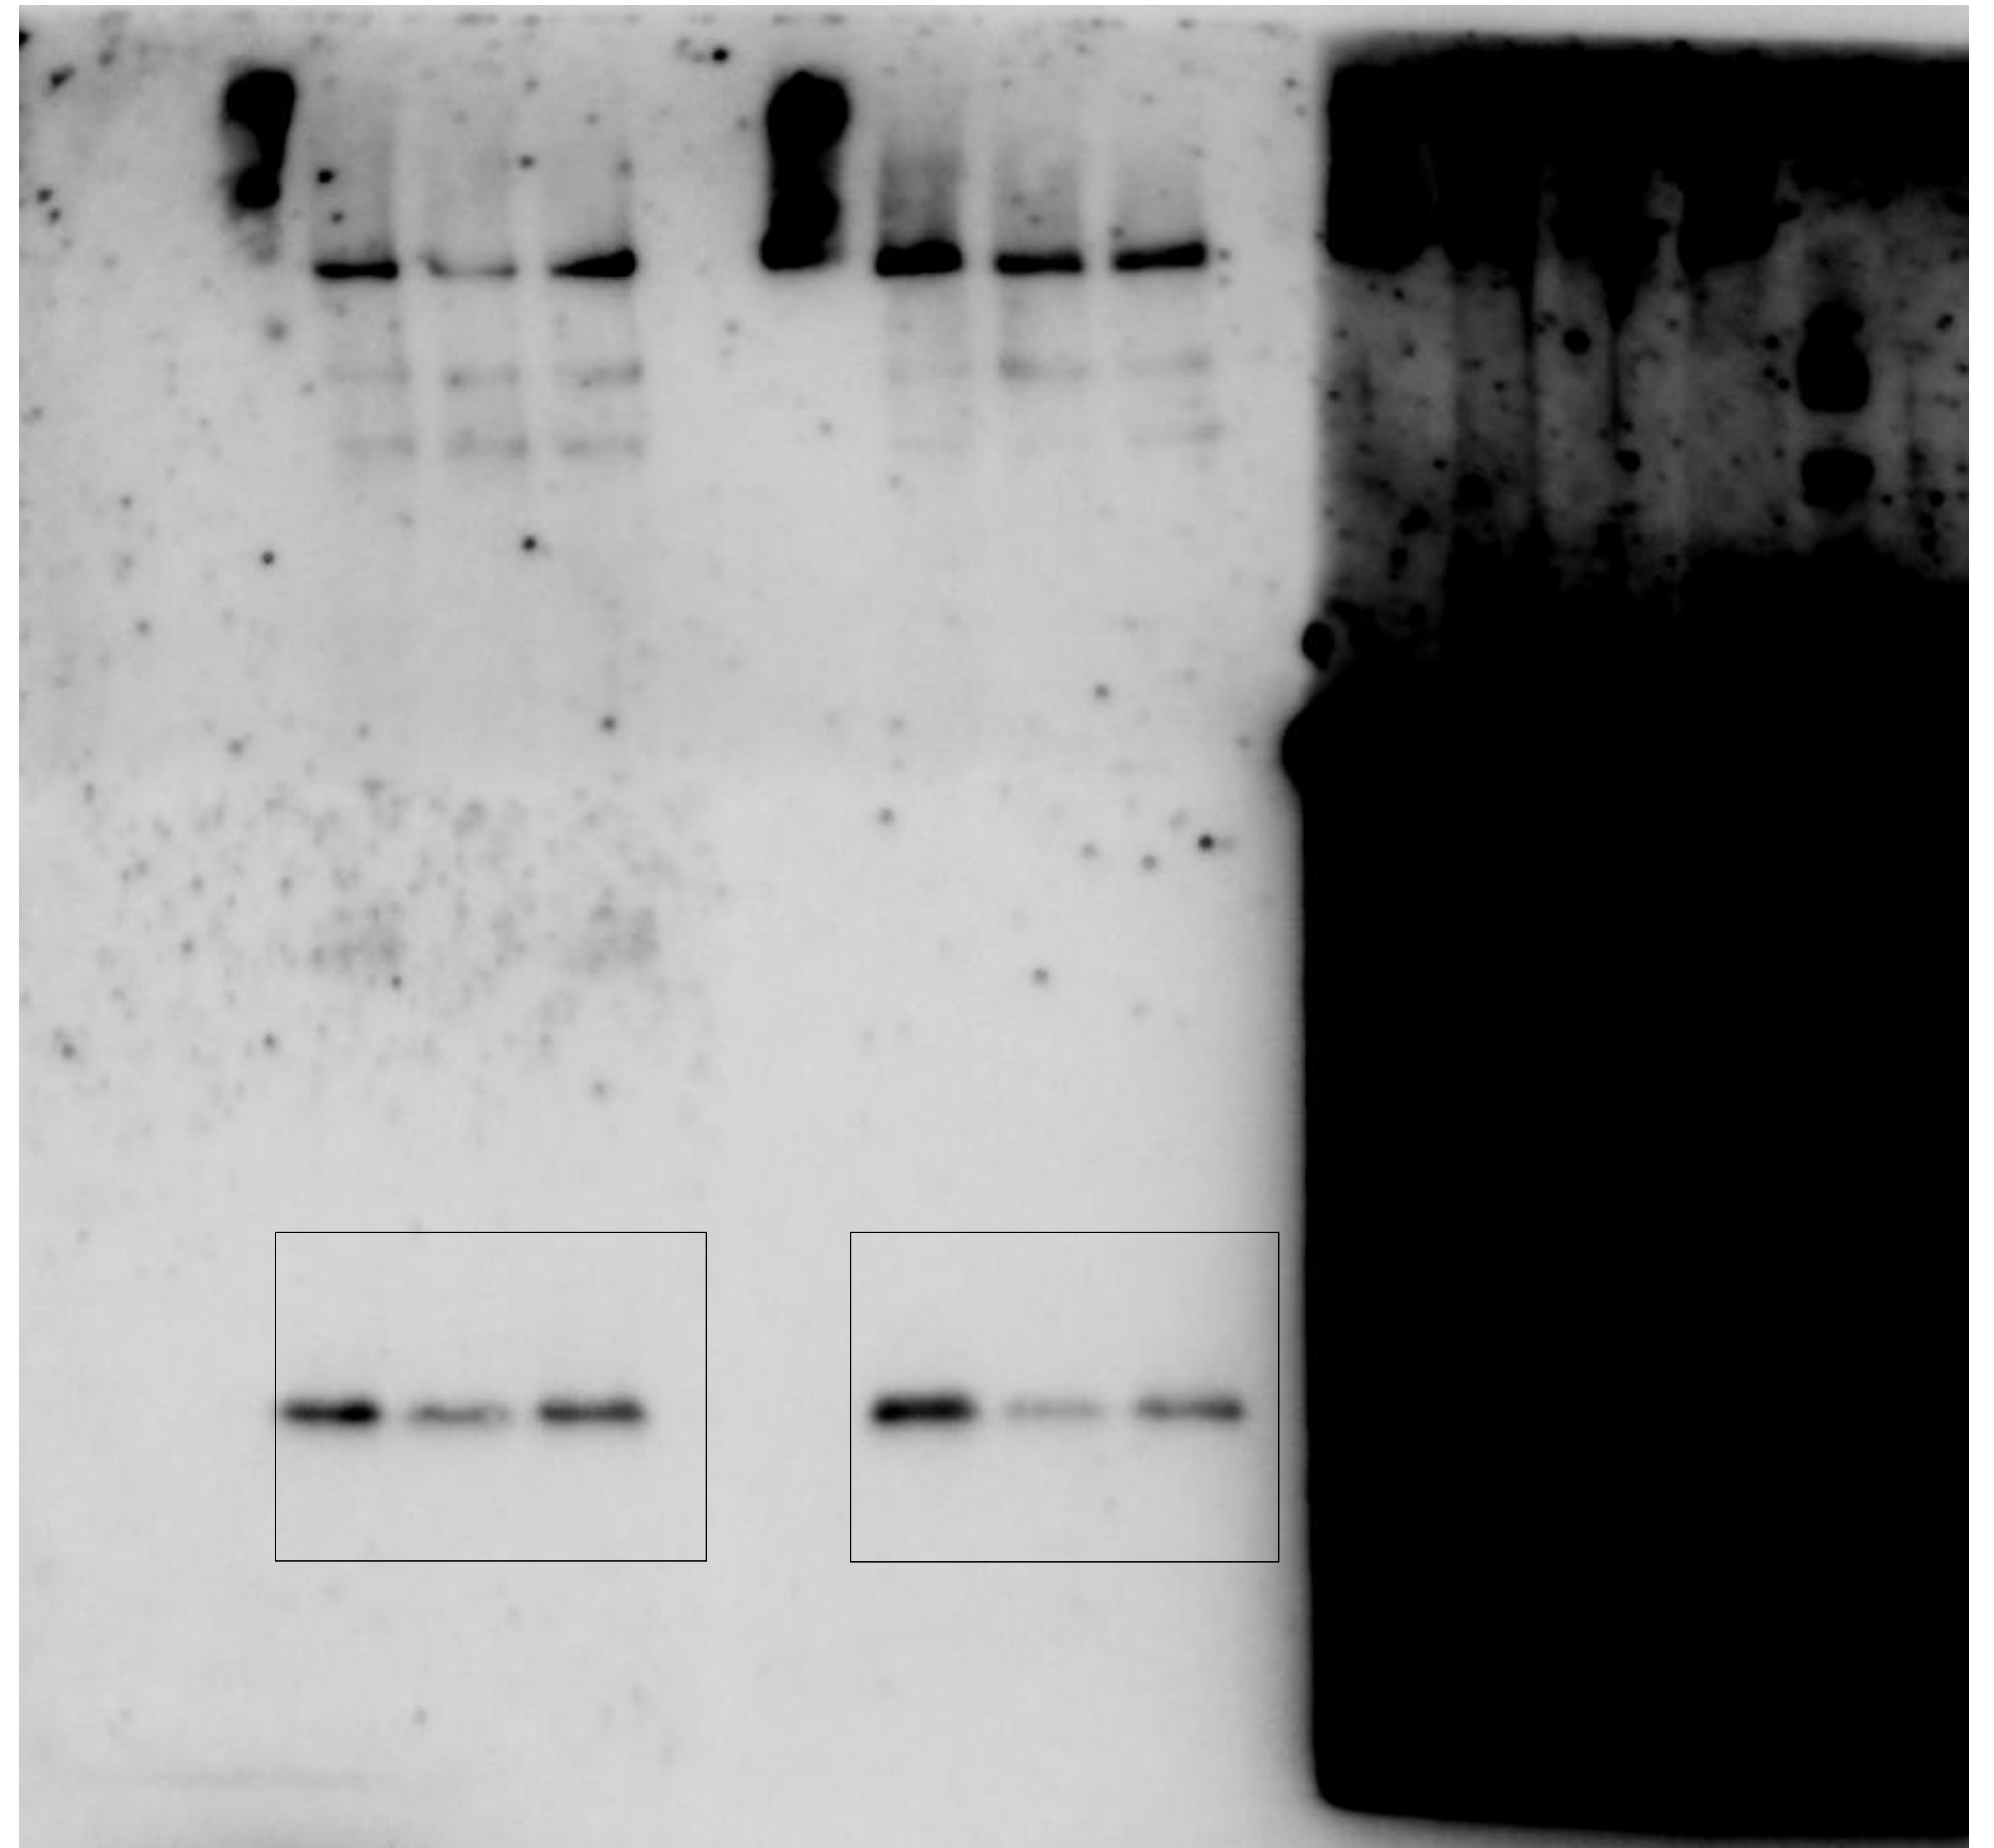

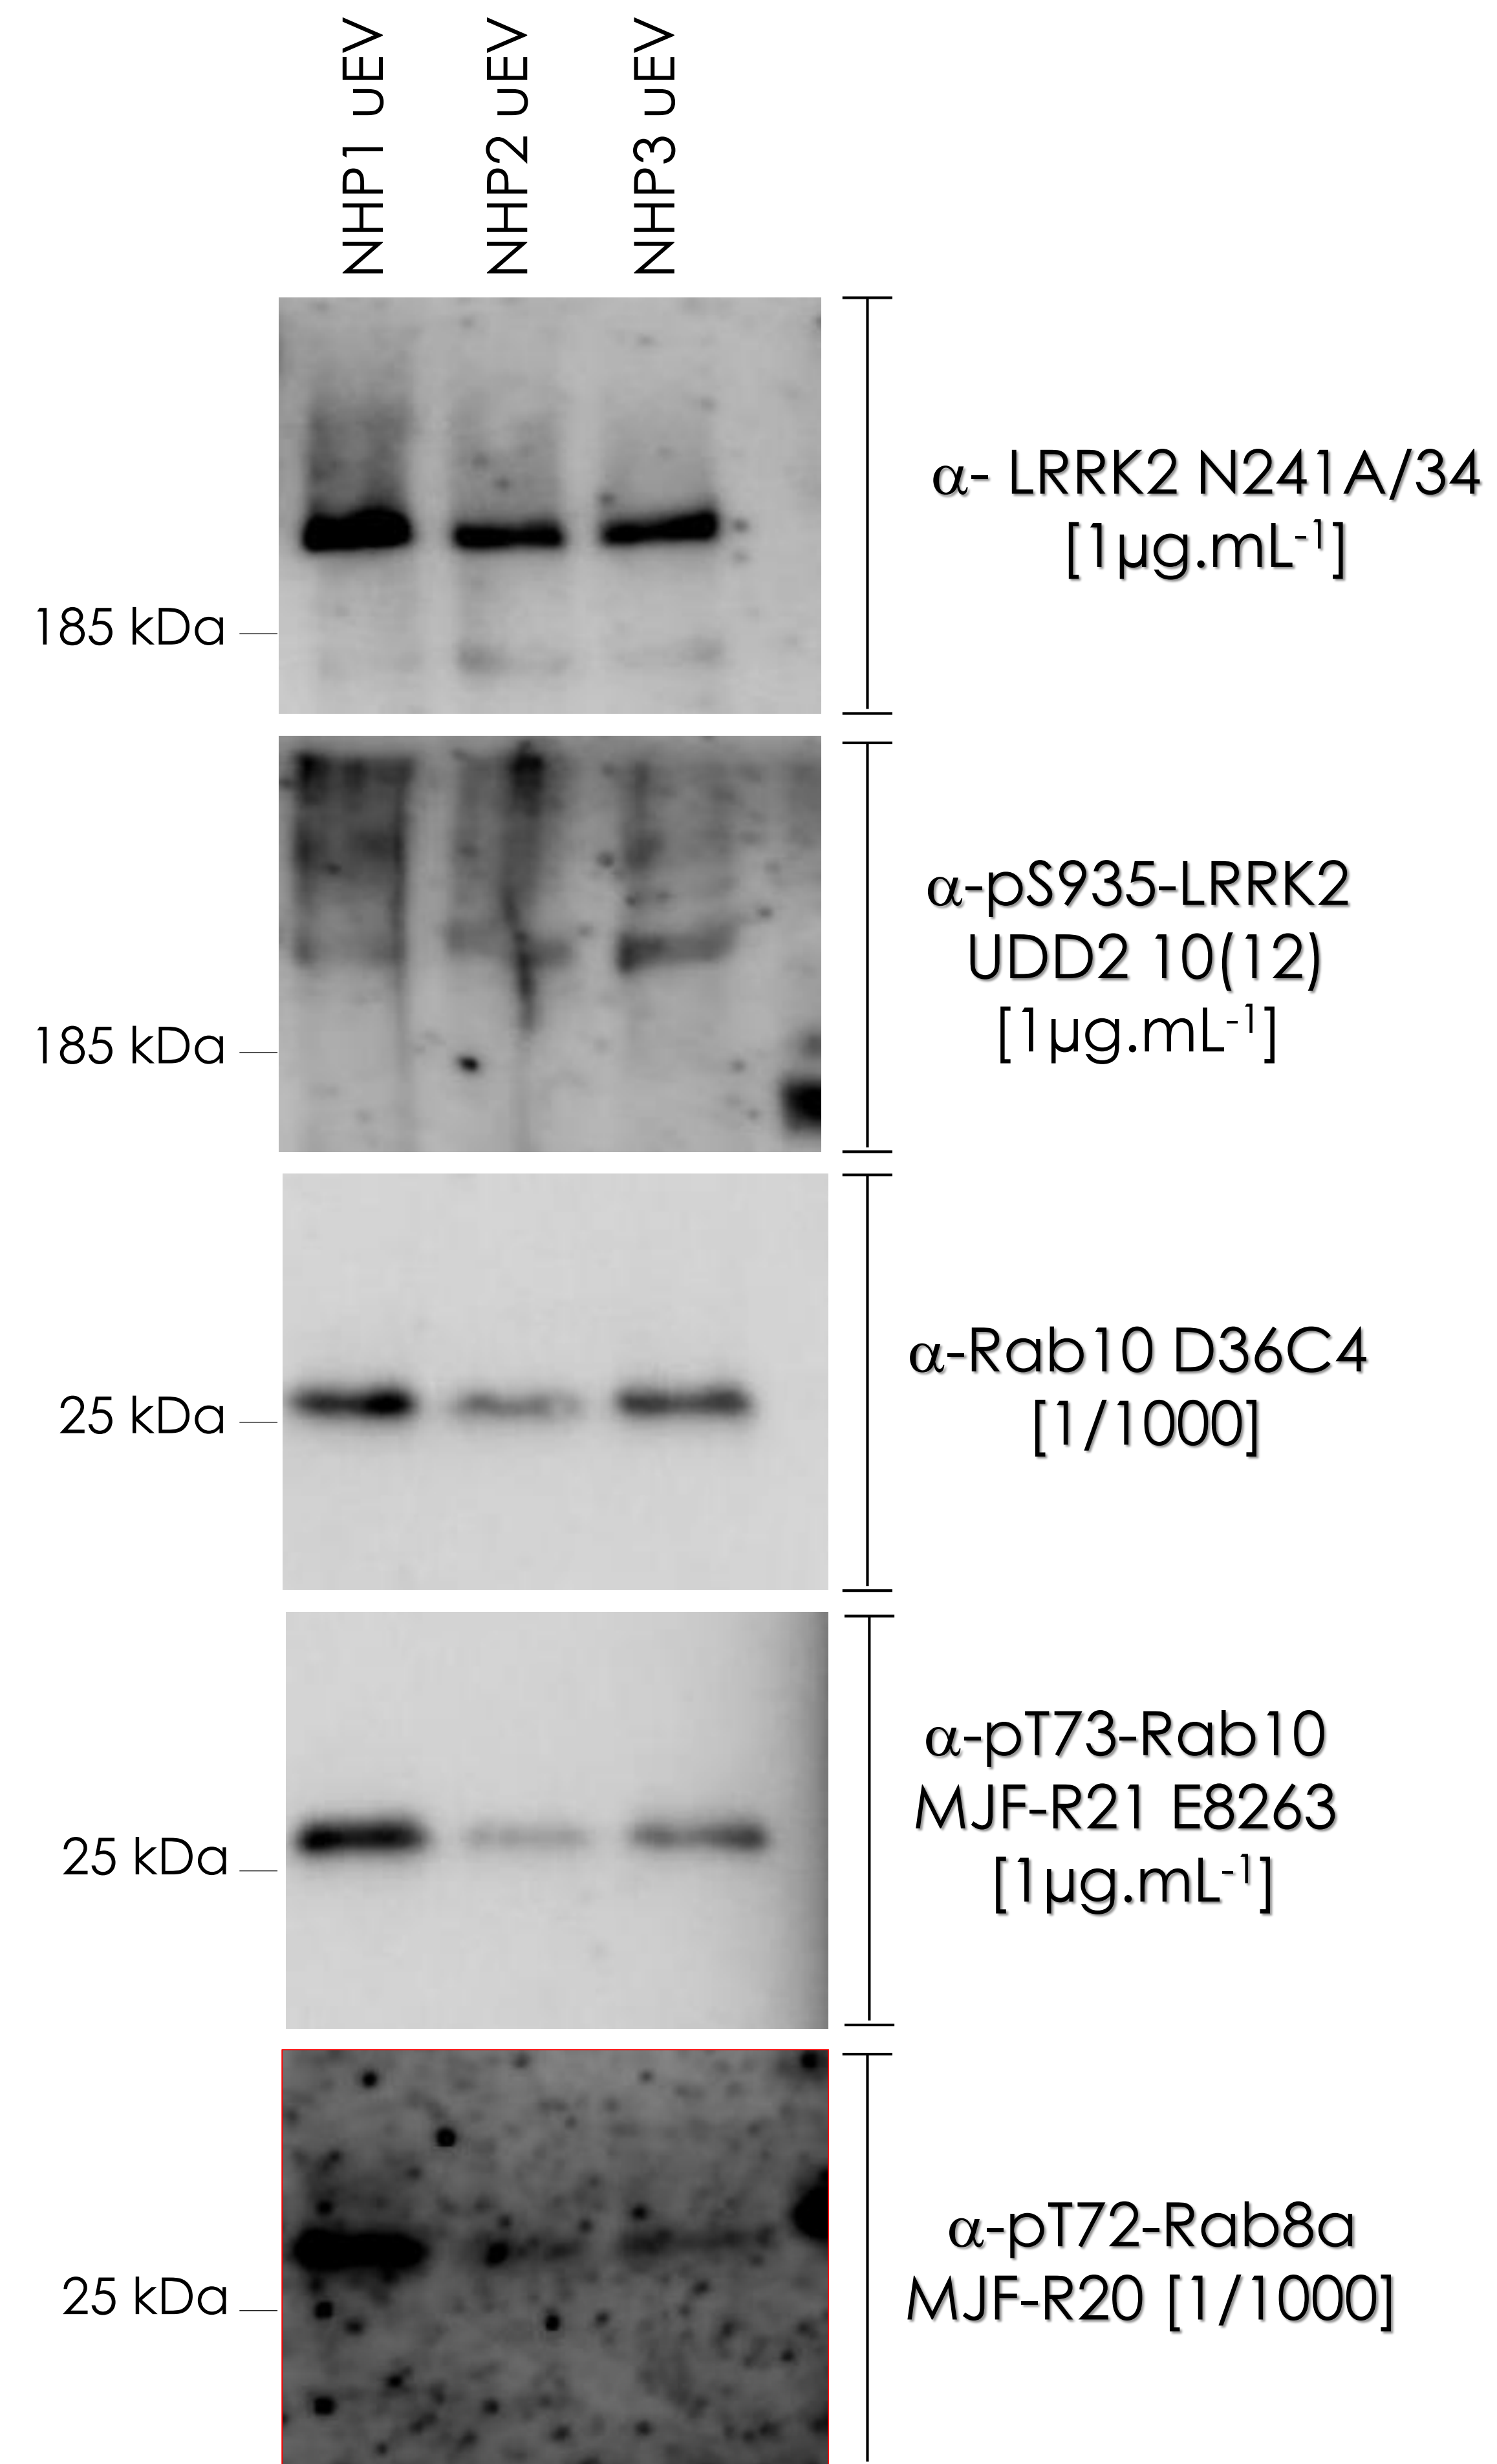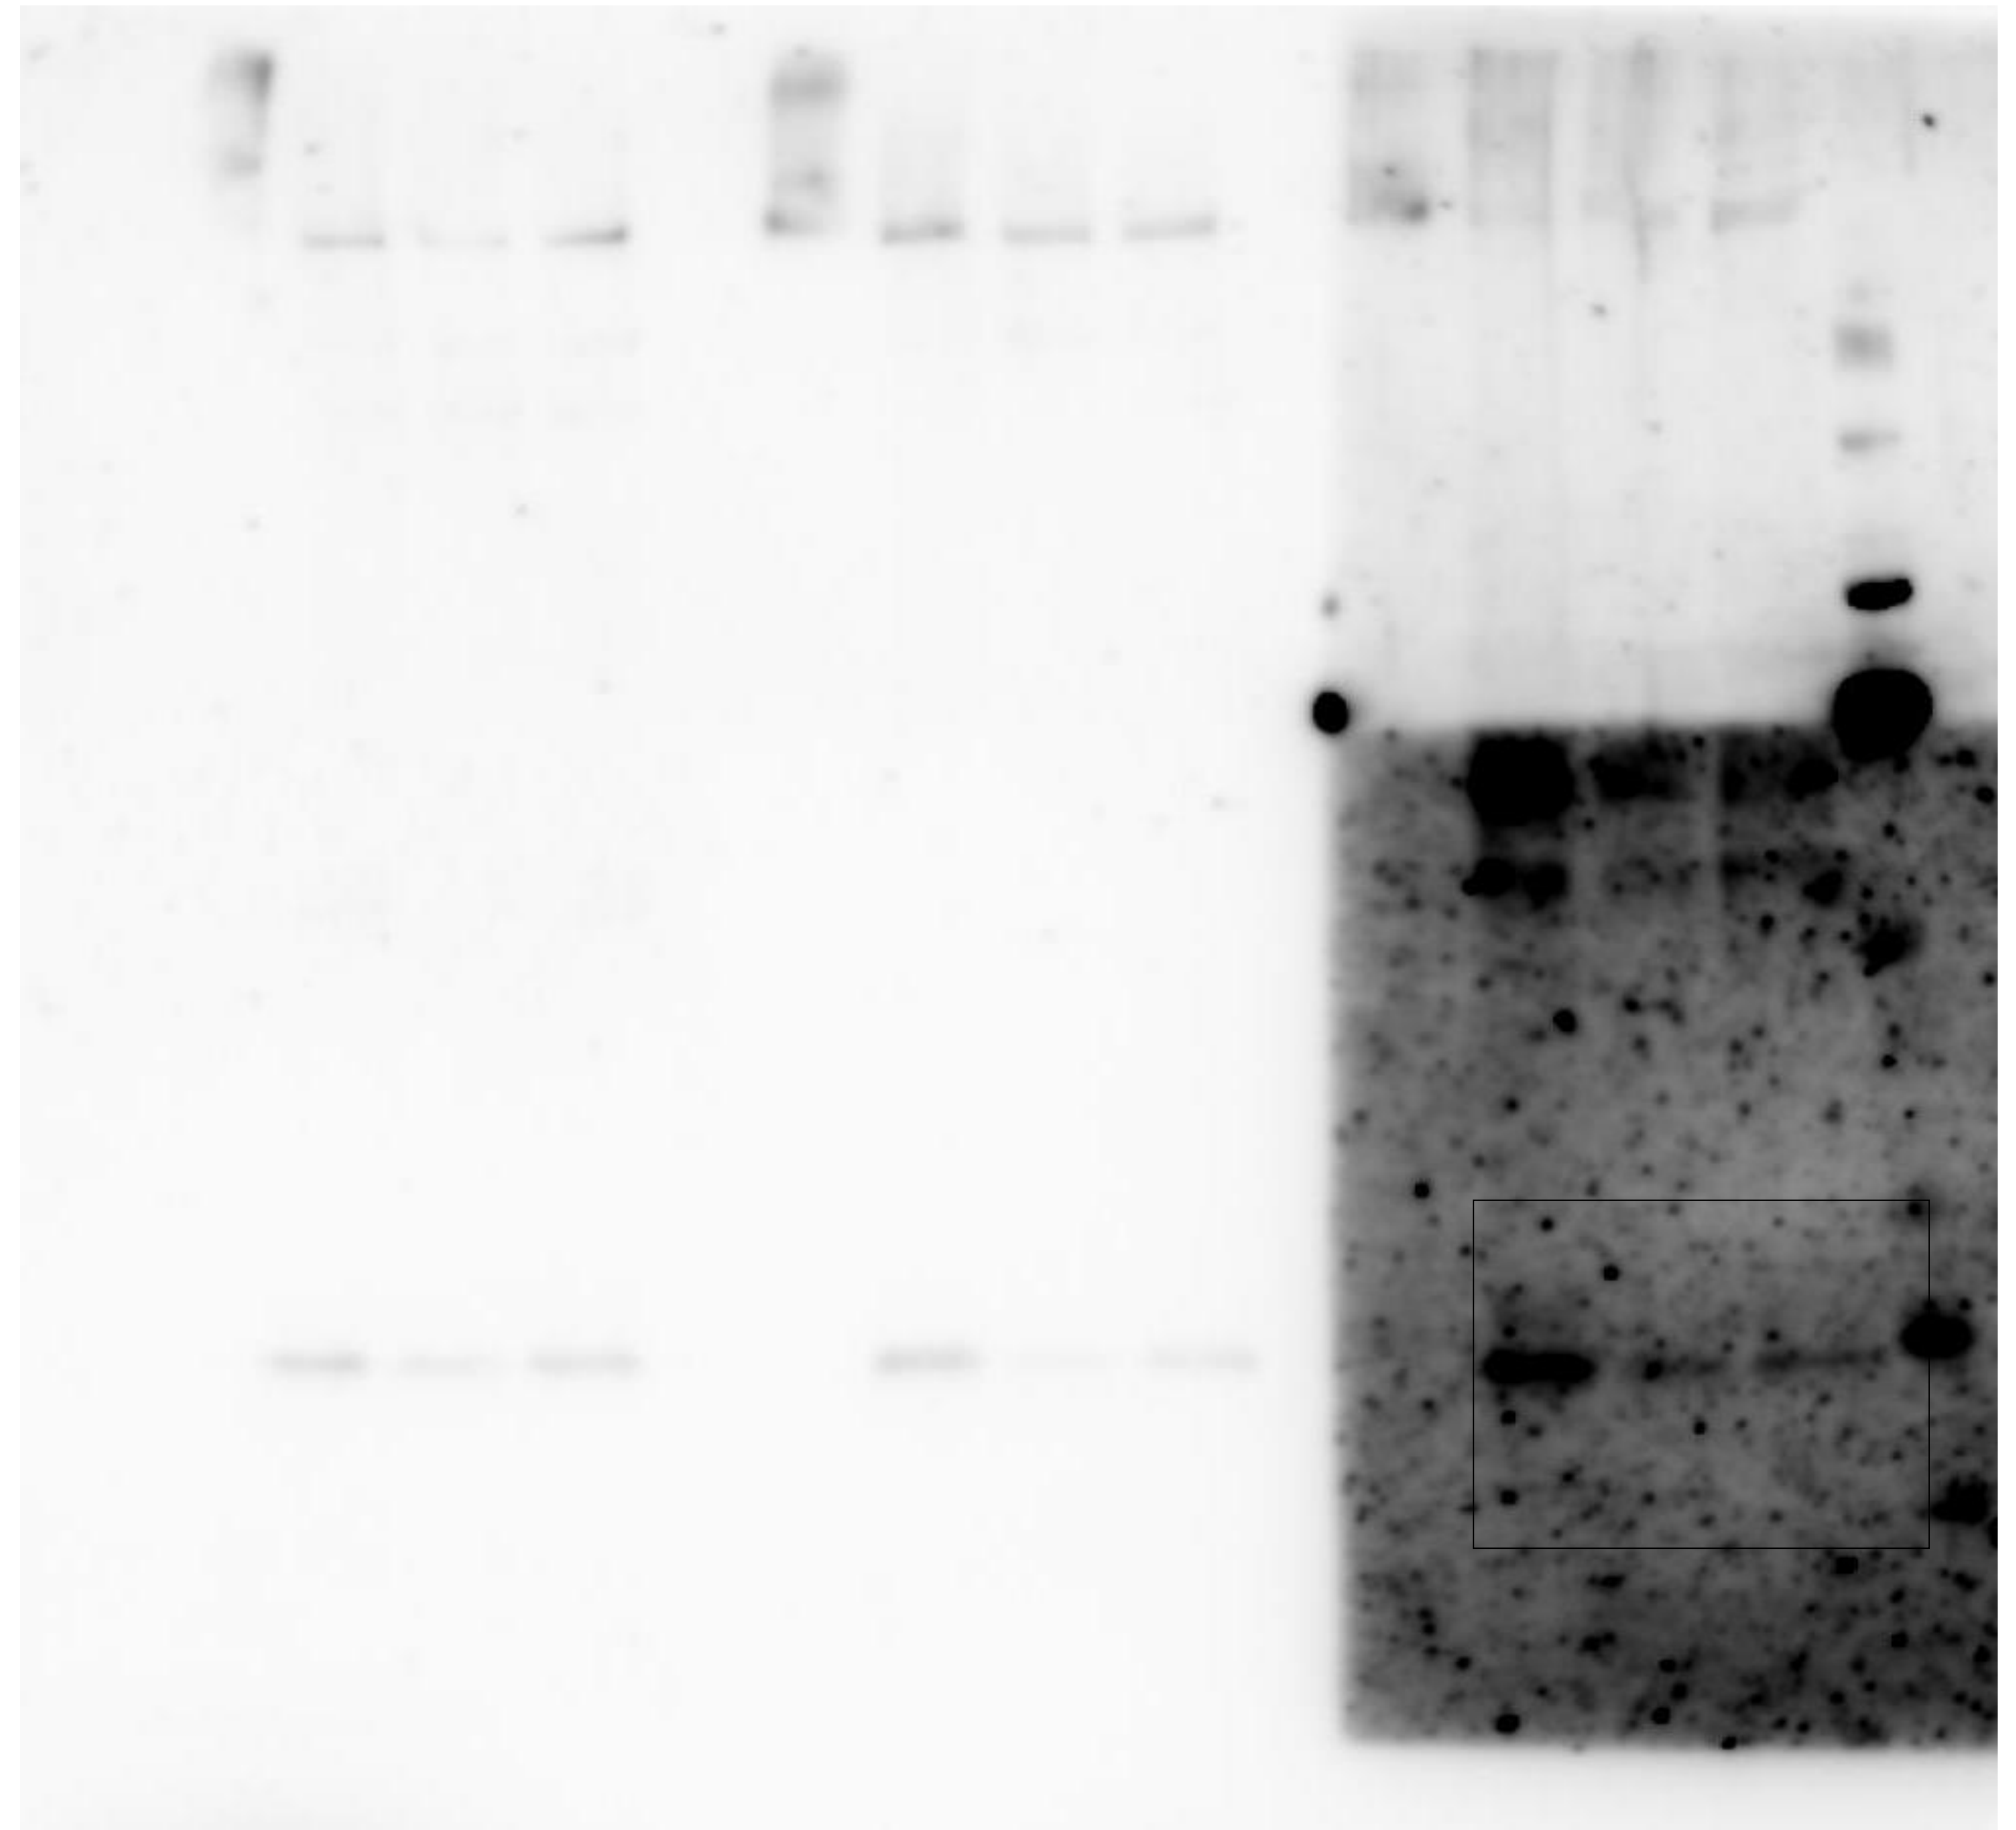

Suppl Figure 14b

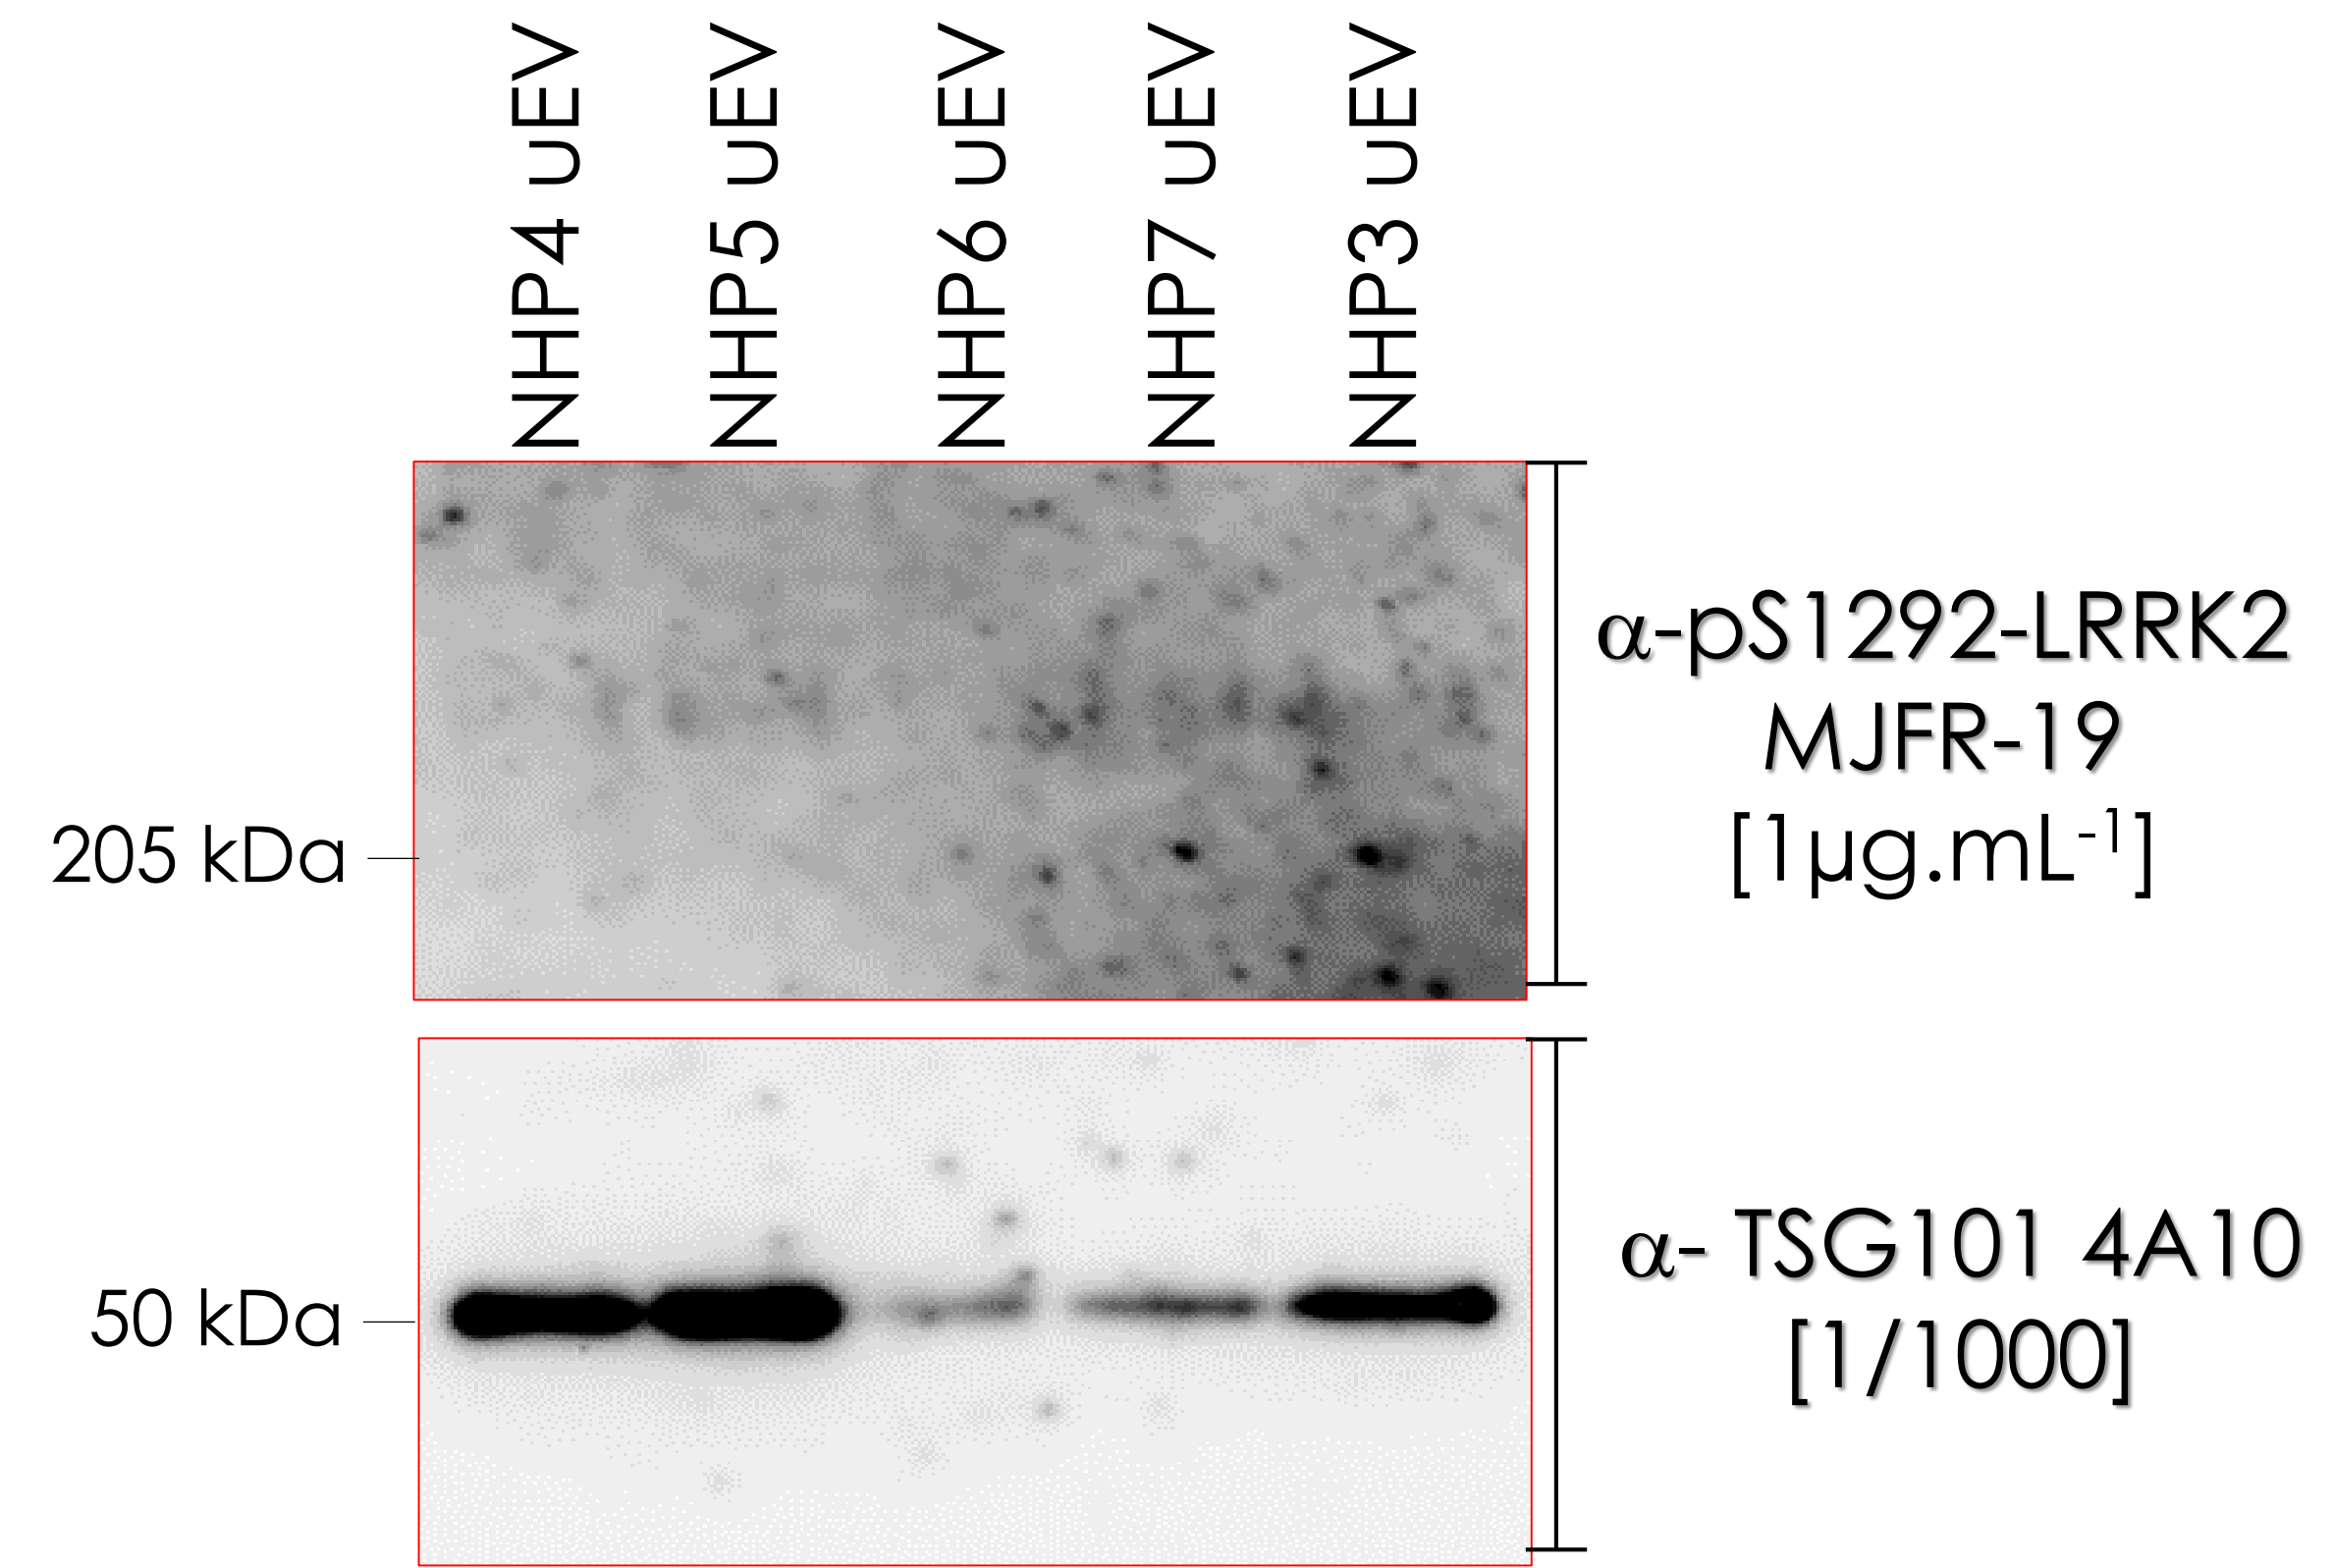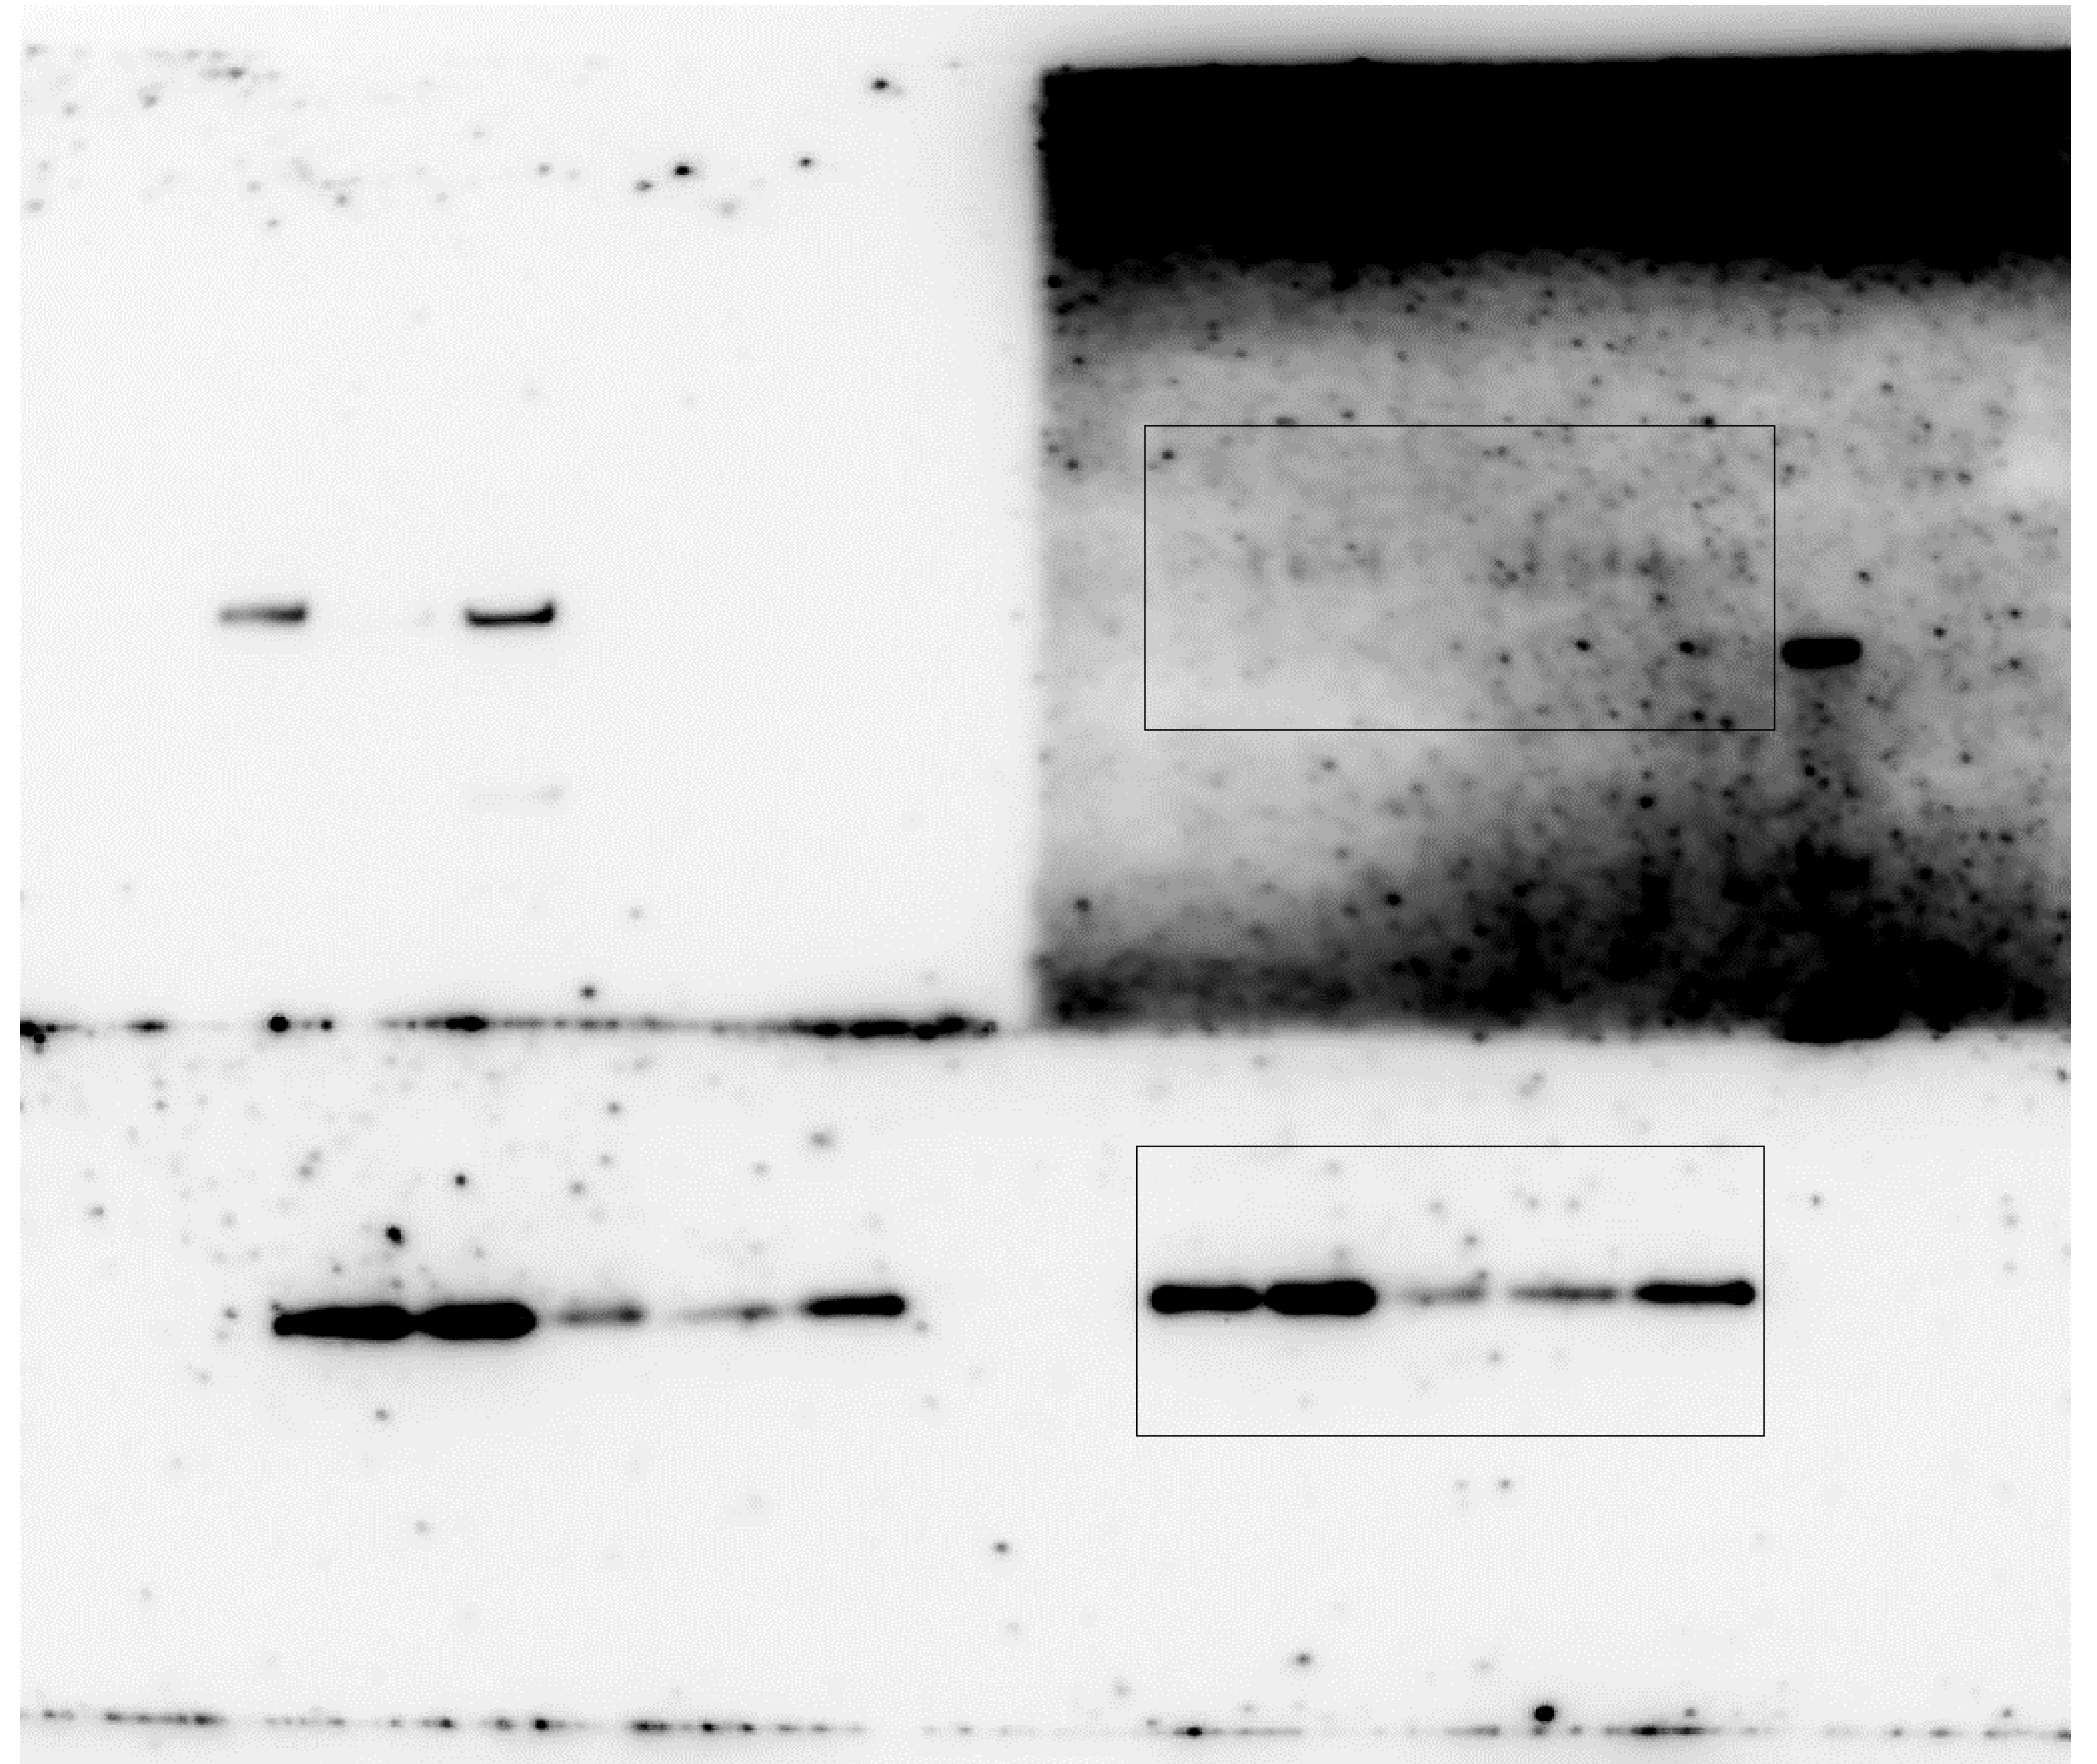

Supplement: 41531_2023_445_MOESM2_ESM.pdf [file 41531_2023_445_MOESM2_ESM.pdf]
